# Supplementary material for: (Ca, Eu, Yb)<sub>23</sub>Cu<sub>7</sub>Mg<sub>4</sub> as a Step towards the Structural Generalization of Rare Earth-Rich Intermetallics
Source: Preprints.org preprint supplement (doi:10.20944/preprints202401.0440.v1), 2024-01-05
Supplement: Supplementary file 1 [file supplementary]

Archive with 4 entries (4 files):
- CIF files/checkcif_Ca23Cu7Mg4.pdf
- CIF files/checkcif_Eu23Cu7Mg4.pdf
- CIF files/PS_34_ECM_a_3_Eu23Cu7Mg4_0m_a.cif
- CIF files/PS_37_CCM_a8_Ca23Cu7Mg4_0m_a.cif
