# Supplementary material for: (Ca, Eu, Yb)<sub>23</sub>Cu<sub>7</sub>Mg<sub>4</sub> as a Step towards the Structural Generalization of Rare Earth-Rich Intermetallics
Source: Preprints.org preprint supplement (doi:10.20944/preprints202401.0440.v1), 2024-01-05
Supplement: Supplementary file 1 [file supplementary › CIF files/PS_34_ECM_a_3_Eu23Cu7Mg4_0m_a.cif]

 
data_PS_34_ECM_a_3_Eu23Cu7Mg4_0m_a
 
_audit_creation_method            'SHELXL-2019/1'
_shelx_SHELXL_version_number      '2019/1'
_chemical_name_systematic         ?
_chemical_name_common             ?
_chemical_melting_point           ?
_chemical_formula_moiety          'Cu7 Eu23 Mg4' 
_chemical_formula_sum             'Cu7 Eu23 Mg4' 
_chemical_formula_weight          4037.10

loop_
 _atom_type_symbol
 _atom_type_description
 _atom_type_scat_dispersion_real
 _atom_type_scat_dispersion_imag
 _atom_type_scat_source
 'Cu'  'Cu'   0.3201   1.2651
 'International Tables Vol C Tables 4.2.6.8 and 6.1.1.4'
 'Eu'  'Eu'  -0.1578   3.6682
 'International Tables Vol C Tables 4.2.6.8 and 6.1.1.4'
 'Mg'  'Mg'   0.0486   0.0363
 'International Tables Vol C Tables 4.2.6.8 and 6.1.1.4'
 
_space_group_crystal_system       hexagonal
_space_group_IT_number            194
_space_group_name_H-M_alt         'P 63/m m c'
_space_group_name_Hall            '-P 6c 2c'
 
_shelx_space_group_comment
;
The symmetry employed for this shelxl refinement is uniquely defined
by the following loop, which should always be used as a source of
symmetry information in preference to the above space-group names.
They are only intended as comments.
;
 
loop_
 _space_group_symop_operation_xyz
 'x, y, z'
 '-y, x-y, z'
 '-x+y, -x, z'
 '-x, -y, z+1/2'
 'y, -x+y, z+1/2'
 'x-y, x, z+1/2'
 'y, x, -z'
 'x-y, -y, -z'
 '-x, -x+y, -z'
 '-y, -x, -z+1/2'
 '-x+y, y, -z+1/2'
 'x, x-y, -z+1/2'
 '-x, -y, -z'
 'y, -x+y, -z'
 'x-y, x, -z'
 'x, y, -z-1/2'
 '-y, x-y, -z-1/2'
 '-x+y, -x, -z-1/2'
 '-y, -x, z'
 '-x+y, y, z'
 'x, x-y, z'
 'y, x, z-1/2'
 'x-y, -y, z-1/2'
 '-x, -x+y, z-1/2'
 
_cell_length_a                    10.659(2)
_cell_length_b                    10.659(2)
_cell_length_c                    24.379(5)
_cell_angle_alpha                 90.00(3)
_cell_angle_beta                  90.00(3)
_cell_angle_gamma                 120.00(3)
_cell_volume                      2398.8(10)
_cell_formula_units_Z             2
_cell_measurement_temperature     293(2)
_cell_measurement_reflns_used     1120
_cell_measurement_theta_min       2.768
_cell_measurement_theta_max       30.501
 
_exptl_crystal_description        'irregularly shaped'
_exptl_crystal_colour             'grey'
_exptl_crystal_density_method     'not measured'
_exptl_crystal_density_diffrn     5.589          
_exptl_crystal_F_000              3400
_exptl_transmission_factor_min    0.5287
_exptl_transmission_factor_max    0.7461
_exptl_crystal_size_max           0.060
_exptl_crystal_size_mid           0.040
_exptl_crystal_size_min           0.03
_exptl_absorpt_coefficient_mu     32.610

_exptl_absorpt_correction_type    'multi-scan' 
_exptl_absorpt_process_details    'Bruker SADABS'
_diffrn_ambient_temperature       293(2)
_diffrn_radiation_wavelength      0.71073
_diffrn_radiation_type            MoK\a
_diffrn_radiation_source          'fine-focus sealed tube' 
_diffrn_radiation_monochromator   graphite 
_diffrn_measurement_device_type   'PHOTON III'
_diffrn_measurement_method        'four \w scans and one \f scan'

_diffrn_detector_area_resol_mean  ?
_diffrn_reflns_number             80771
_diffrn_reflns_av_unetI/netI      0.0180
_diffrn_reflns_av_R_equivalents   0.0830
_diffrn_reflns_limit_h_min        -15
_diffrn_reflns_limit_h_max        15
_diffrn_reflns_limit_k_min        -15
_diffrn_reflns_limit_k_max        13
_diffrn_reflns_limit_l_min        -34
_diffrn_reflns_limit_l_max        34
_diffrn_reflns_theta_min          2.768
_diffrn_reflns_theta_max          30.501
_diffrn_reflns_theta_full         25.243
_diffrn_measured_fraction_theta_max   0.998
_diffrn_measured_fraction_theta_full  0.997
_diffrn_reflns_Laue_measured_fraction_max    0.998
_diffrn_reflns_Laue_measured_fraction_full   0.997
_diffrn_reflns_point_group_measured_fraction_max   0.998
_diffrn_reflns_point_group_measured_fraction_full  0.997
_reflns_number_total              1435
_reflns_number_gt                 1120
_reflns_threshold_expression      'I > 2\s(I)'
_reflns_Friedel_coverage          0.000
_reflns_Friedel_fraction_max      .
_reflns_Friedel_fraction_full     .
 
_reflns_special_details
;
 Reflections were merged by SHELXL according to the crystal
 class for the calculation of statistics and refinement.
 
 _reflns_Friedel_fraction is defined as the number of unique
 Friedel pairs measured divided by the number that would be
 possible theoretically, ignoring centric projections and
 systematic absences.
;
 
_computing_data_collection        ?
_computing_cell_refinement        ?
_computing_data_reduction         ?
_computing_structure_solution     ?
_computing_structure_refinement 'SHELXL-2019/1 (Sheldrick, 2019)'
_computing_molecular_graphics     ?
_computing_publication_material   ?
_refine_special_details           ?
_refine_ls_structure_factor_coef  Fsqd
_refine_ls_matrix_type            full
_refine_ls_weighting_scheme       calc
_refine_ls_weighting_details
'w=1/[\s^2^(Fo^2^)+(0.0145P)^2^+41.5921P] where P=(Fo^2^+2Fc^2^)/3'
_atom_sites_solution_primary      ?
_atom_sites_solution_secondary    ?
_atom_sites_solution_hydrogens    .
_refine_ls_hydrogen_treatment     undef
_refine_ls_extinction_method      none
_refine_ls_extinction_coef        .
_refine_ls_number_reflns          1435
_refine_ls_number_parameters      40
_refine_ls_number_restraints      0
_refine_ls_R_factor_all           0.0445
_refine_ls_R_factor_gt            0.0259
_refine_ls_wR_factor_ref          0.0524
_refine_ls_wR_factor_gt           0.0454
_refine_ls_goodness_of_fit_ref    0.978
_refine_ls_restrained_S_all       0.978
_refine_ls_shift/su_max           0.001
_refine_ls_shift/su_mean          0.000
 
loop_
 _atom_site_label
 _atom_site_type_symbol
 _atom_site_fract_x
 _atom_site_fract_y
 _atom_site_fract_z
 _atom_site_U_iso_or_equiv
 _atom_site_adp_type
 _atom_site_occupancy
 _atom_site_site_symmetry_order  
 _atom_site_calc_flag
 _atom_site_refinement_flags_posn
 _atom_site_refinement_flags_adp
 _atom_site_refinement_flags_occupancy
 _atom_site_disorder_assembly
 _atom_site_disorder_group
Eu1 Eu 0.666667 0.333333 0.38390(3) 0.02207(16) Uani 1 6 d S T P . .
Eu2 Eu 0.46161(2) 0.53839(2) 0.33232(2) 0.02404(11) Uani 1 2 d S T P . .
Eu3 Eu 0.79283(3) 0.58566(5) 0.53062(2) 0.02445(11) Uani 1 2 d S T P . .
Eu4 Eu 0.12316(4) -0.12316(4) 0.250000 0.02637(14) Uani 1 4 d S T P . .
Eu5 Eu 0.25099(5) 0.12550(3) 0.11768(2) 0.02770(11) Uani 1 2 d S T P . .
Cu1 Cu 0.52492(6) 0.47508(6) 0.45093(4) 0.0308(3) Uani 1 2 d S T P . .
Cu2 Cu 0.333333 0.666667 0.250000 0.0311(6) Uani 1 12 d S T P . .
Mg1 Mg 0.000000 0.000000 0.000000 0.0255(16) Uani 1 12 d S T P . .
Mg2 Mg 0.4630(5) 0.2315(2) 0.250000 0.0254(9) Uani 1 4 d S T P . .
 
loop_
 _atom_site_aniso_label
 _atom_site_aniso_U_11
 _atom_site_aniso_U_22
 _atom_site_aniso_U_33
 _atom_site_aniso_U_23
 _atom_site_aniso_U_13
 _atom_site_aniso_U_12
Eu1 0.0214(2) 0.0214(2) 0.0234(4) 0.000 0.000 0.01070(11)
Eu2 0.02601(17) 0.02601(17) 0.0206(2) 0.00186(9) -0.00186(9) 0.01338(19)
Eu3 0.02226(16) 0.0257(2) 0.0266(2) -0.00046(19) -0.00023(9) 0.01284(12)
Eu4 0.0251(2) 0.0251(2) 0.0256(3) 0.000 0.000 0.0100(3)
Eu5 0.0286(2) 0.02832(18) 0.0263(2) -0.00225(10) -0.00450(19) 0.01429(12)
Cu1 0.0399(5) 0.0399(5) 0.0228(5) 0.0000(2) 0.0000(2) 0.0277(6)
Cu2 0.0367(10) 0.0367(10) 0.0197(13) 0.000 0.000 0.0184(5)
Mg1 0.022(2) 0.022(2) 0.032(4) 0.000 0.000 0.0112(11)
Mg2 0.026(2) 0.0250(16) 0.025(2) 0.000 0.000 0.0132(11)
 
_geom_special_details
;
 All esds (except the esd in the dihedral angle between two l.s. planes)
 are estimated using the full covariance matrix.  The cell esds are taken
 into account individually in the estimation of esds in distances, angles
 and torsion angles; correlations between esds in cell parameters are only
 used when they are defined by crystal symmetry.  An approximate (isotropic)
 treatment of cell esds is used for estimating esds involving l.s. planes.
;
 
loop_
 _geom_bond_atom_site_label_1
 _geom_bond_atom_site_label_2
 _geom_bond_distance
 _geom_bond_site_symmetry_2
 _geom_bond_publ_flag
Eu1 Cu1 3.0852(13) 3_665 ?
Eu1 Cu1 3.0852(13) . ?
Eu1 Cu1 3.0852(13) 2_655 ?
Eu1 Mg2 3.767(2) . ?
Eu1 Mg2 3.767(2) 2_655 ?
Eu1 Mg2 3.767(2) 3_665 ?
Eu1 Eu5 3.8373(9) 17_656 ?
Eu1 Eu5 3.8373(9) 18_666 ?
Eu1 Eu5 3.8373(9) 16_556 ?
Eu1 Eu2 3.9892(9) 2_655 ?
Eu1 Eu2 3.9892(8) 3_665 ?
Eu1 Eu2 3.9892(9) . ?
Eu2 Cu2 3.1042(6) . ?
Eu2 Cu1 3.1190(13) . ?
Eu2 Mg2 3.8441(7) . ?
Eu2 Mg2 3.8441(7) 3_665 ?
Eu2 Eu4 3.9374(8) 2 ?
Eu2 Eu4 3.9374(8) 3_665 ?
Eu2 Eu5 4.0019(8) 18_666 ?
Eu2 Eu5 4.0019(8) 16_556 ?
Eu2 Eu2 4.0138(12) 16_556 ?
Eu2 Eu3 4.0845(8) 14_566 ?
Eu2 Eu3 4.0845(8) 13_666 ?
Eu3 Cu1 3.1464(11) 13_666 ?
Eu3 Cu1 3.1465(11) 15_656 ?
Eu3 Cu1 3.1547(10) 3_665 ?
Eu3 Cu1 3.1548(10) . ?
Eu3 Mg1 3.8969(8) 4_665 ?
Eu3 Eu5 3.9172(9) 18_666 ?
Eu3 Eu5 3.9547(7) 5_665 ?
Eu3 Eu5 3.9547(8) 4_665 ?
Eu3 Eu3 4.0344(11) 2_655 ?
Eu3 Eu3 4.0344(11) 3_665 ?
Eu4 Mg2 3.704(4) 3 ?
Eu4 Mg2 3.704(4) . ?
Eu4 Eu4 3.9382(14) 3 ?
Eu4 Eu4 3.9382(14) 2 ?
Eu4 Eu5 3.9594(8) 16_556 ?
Eu4 Eu5 3.9594(7) 3 ?
Eu4 Eu5 3.9594(7) . ?
Eu4 Eu5 3.9594(8) 18_556 ?
Eu5 Mg1 3.6876(7) . ?
Eu5 Mg2 3.773(3) . ?
Eu5 Eu5 4.0130(11) 3 ?
Eu5 Eu5 4.0130(11) 2 ?
Cu1 Cu1 2.563(2) 13_666 ?
Mg2 Mg2 3.256(8) 3_665 ?
Mg2 Mg2 3.256(8) 2_655 ?
 
loop_
 _geom_angle_atom_site_label_1
 _geom_angle_atom_site_label_2
 _geom_angle_atom_site_label_3
 _geom_angle
 _geom_angle_site_symmetry_1
 _geom_angle_site_symmetry_3
 _geom_angle_publ_flag
Cu1 Eu1 Cu1 94.54(3) 3_665 . ?
Cu1 Eu1 Cu1 94.54(3) 3_665 2_655 ?
Cu1 Eu1 Cu1 94.54(3) . 2_655 ?
Cu1 Eu1 Mg2 151.92(7) 3_665 . ?
Cu1 Eu1 Mg2 104.32(5) . . ?
Cu1 Eu1 Mg2 104.32(5) 2_655 . ?
Cu1 Eu1 Mg2 104.32(5) 3_665 2_655 ?
Cu1 Eu1 Mg2 151.92(7) . 2_655 ?
Cu1 Eu1 Mg2 104.32(5) 2_655 2_655 ?
Mg2 Eu1 Mg2 51.21(10) . 2_655 ?
Cu1 Eu1 Mg2 104.32(5) 3_665 3_665 ?
Cu1 Eu1 Mg2 104.32(5) . 3_665 ?
Cu1 Eu1 Mg2 151.92(7) 2_655 3_665 ?
Mg2 Eu1 Mg2 51.21(10) . 3_665 ?
Mg2 Eu1 Mg2 51.21(10) 2_655 3_665 ?
Cu1 Eu1 Eu5 65.244(8) 3_665 17_656 ?
Cu1 Eu1 Eu5 148.59(3) . 17_656 ?
Cu1 Eu1 Eu5 65.244(8) 2_655 17_656 ?
Mg2 Eu1 Eu5 103.93(3) . 17_656 ?
Mg2 Eu1 Eu5 59.49(6) 2_655 17_656 ?
Mg2 Eu1 Eu5 103.93(3) 3_665 17_656 ?
Cu1 Eu1 Eu5 65.243(8) 3_665 18_666 ?
Cu1 Eu1 Eu5 65.243(8) . 18_666 ?
Cu1 Eu1 Eu5 148.59(3) 2_655 18_666 ?
Mg2 Eu1 Eu5 103.93(3) . 18_666 ?
Mg2 Eu1 Eu5 103.93(3) 2_655 18_666 ?
Mg2 Eu1 Eu5 59.49(6) 3_665 18_666 ?
Eu5 Eu1 Eu5 119.990(1) 17_656 18_666 ?
Cu1 Eu1 Eu5 148.59(3) 3_665 16_556 ?
Cu1 Eu1 Eu5 65.243(8) . 16_556 ?
Cu1 Eu1 Eu5 65.243(8) 2_655 16_556 ?
Mg2 Eu1 Eu5 59.49(6) . 16_556 ?
Mg2 Eu1 Eu5 103.93(3) 2_655 16_556 ?
Mg2 Eu1 Eu5 103.93(3) 3_665 16_556 ?
Eu5 Eu1 Eu5 119.990(1) 17_656 16_556 ?
Eu5 Eu1 Eu5 119.990(1) 18_666 16_556 ?
Cu1 Eu1 Eu2 124.713(6) 3_665 2_655 ?
Cu1 Eu1 Eu2 124.712(6) . 2_655 ?
Cu1 Eu1 Eu2 50.36(2) 2_655 2_655 ?
Mg2 Eu1 Eu2 59.34(2) . 2_655 ?
Mg2 Eu1 Eu2 59.34(2) 2_655 2_655 ?
Mg2 Eu1 Eu2 101.56(6) 3_665 2_655 ?
Eu5 Eu1 Eu2 61.468(4) 17_656 2_655 ?
Eu5 Eu1 Eu2 161.05(2) 18_666 2_655 ?
Eu5 Eu1 Eu2 61.468(4) 16_556 2_655 ?
Cu1 Eu1 Eu2 50.36(2) 3_665 3_665 ?
Cu1 Eu1 Eu2 124.712(6) . 3_665 ?
Cu1 Eu1 Eu2 124.713(6) 2_655 3_665 ?
Mg2 Eu1 Eu2 101.56(6) . 3_665 ?
Mg2 Eu1 Eu2 59.34(2) 2_655 3_665 ?
Mg2 Eu1 Eu2 59.34(2) 3_665 3_665 ?
Eu5 Eu1 Eu2 61.468(4) 17_656 3_665 ?
Eu5 Eu1 Eu2 61.468(4) 18_666 3_665 ?
Eu5 Eu1 Eu2 161.05(2) 16_556 3_665 ?
Eu2 Eu1 Eu2 110.545(13) 2_655 3_665 ?
Cu1 Eu1 Eu2 124.711(6) 3_665 . ?
Cu1 Eu1 Eu2 50.36(2) . . ?
Cu1 Eu1 Eu2 124.711(6) 2_655 . ?
Mg2 Eu1 Eu2 59.34(2) . . ?
Mg2 Eu1 Eu2 101.56(6) 2_655 . ?
Mg2 Eu1 Eu2 59.34(2) 3_665 . ?
Eu5 Eu1 Eu2 161.05(2) 17_656 . ?
Eu5 Eu1 Eu2 61.468(4) 18_666 . ?
Eu5 Eu1 Eu2 61.468(4) 16_556 . ?
Eu2 Eu1 Eu2 110.545(13) 2_655 . ?
Eu2 Eu1 Eu2 110.545(13) 3_665 . ?
Cu2 Eu2 Cu1 152.29(3) . . ?
Cu2 Eu2 Mg2 103.14(3) . . ?
Cu1 Eu2 Mg2 101.92(3) . . ?
Cu2 Eu2 Mg2 103.14(3) . 3_665 ?
Cu1 Eu2 Mg2 101.92(3) . 3_665 ?
Mg2 Eu2 Mg2 50.11(13) . 3_665 ?
Cu2 Eu2 Eu4 65.641(12) . 2 ?
Cu1 Eu2 Eu4 120.883(11) . 2 ?
Mg2 Eu2 Eu4 56.84(7) . 2 ?
Mg2 Eu2 Eu4 100.13(5) 3_665 2 ?
Cu2 Eu2 Eu4 65.641(11) . 3_665 ?
Cu1 Eu2 Eu4 120.883(11) . 3_665 ?
Mg2 Eu2 Eu4 100.13(5) . 3_665 ?
Mg2 Eu2 Eu4 56.84(7) 3_665 3_665 ?
Eu4 Eu2 Eu4 117.18(2) 2 3_665 ?
Cu2 Eu2 Eu1 158.097(18) . . ?
Cu1 Eu2 Eu1 49.61(2) . . ?
Mg2 Eu2 Eu1 57.45(4) . . ?
Mg2 Eu2 Eu1 57.45(4) 3_665 . ?
Eu4 Eu2 Eu1 105.298(12) 2 . ?
Eu4 Eu2 Eu1 105.298(12) 3_665 . ?
Cu2 Eu2 Eu5 123.567(9) . 18_666 ?
Cu1 Eu2 Eu5 62.788(12) . 18_666 ?
Mg2 Eu2 Eu5 99.51(7) . 18_666 ?
Mg2 Eu2 Eu5 57.45(4) 3_665 18_666 ?
Eu4 Eu2 Eu5 156.158(15) 2 18_666 ?
Eu4 Eu2 Eu5 59.822(13) 3_665 18_666 ?
Eu1 Eu2 Eu5 57.396(9) . 18_666 ?
Cu2 Eu2 Eu5 123.567(9) . 16_556 ?
Cu1 Eu2 Eu5 62.788(12) . 16_556 ?
Mg2 Eu2 Eu5 57.45(4) . 16_556 ?
Mg2 Eu2 Eu5 99.51(7) 3_665 16_556 ?
Eu4 Eu2 Eu5 59.822(13) 2 16_556 ?
Eu4 Eu2 Eu5 156.158(15) 3_665 16_556 ?
Eu1 Eu2 Eu5 57.396(9) . 16_556 ?
Eu5 Eu2 Eu5 112.271(18) 18_666 16_556 ?
Cu2 Eu2 Eu2 49.722(12) . 16_556 ?
Cu1 Eu2 Eu2 157.99(2) . 16_556 ?
Mg2 Eu2 Eu2 58.529(9) . 16_556 ?
Mg2 Eu2 Eu2 58.529(9) 3_665 16_556 ?
Eu4 Eu2 Eu2 59.356(10) 2 16_556 ?
Eu4 Eu2 Eu2 59.357(10) 3_665 16_556 ?
Eu1 Eu2 Eu2 108.375(13) . 16_556 ?
Eu5 Eu2 Eu2 107.735(10) 18_666 16_556 ?
Eu5 Eu2 Eu2 107.735(10) 16_556 16_556 ?
Cu2 Eu2 Eu3 107.704(17) . 14_566 ?
Cu1 Eu2 Eu3 49.61(2) . 14_566 ?
Mg2 Eu2 Eu3 148.69(4) . 14_566 ?
Mg2 Eu2 Eu3 115.86(5) 3_665 14_566 ?
Eu4 Eu2 Eu3 143.749(12) 2 14_566 ?
Eu4 Eu2 Eu3 87.905(16) 3_665 14_566 ?
Eu1 Eu2 Eu3 91.246(15) . 14_566 ?
Eu5 Eu2 Eu3 58.547(10) 18_666 14_566 ?
Eu5 Eu2 Eu3 107.359(17) 16_556 14_566 ?
Eu2 Eu2 Eu3 144.894(10) 16_556 14_566 ?
Cu2 Eu2 Eu3 107.704(16) . 13_666 ?
Cu1 Eu2 Eu3 49.61(2) . 13_666 ?
Mg2 Eu2 Eu3 115.86(5) . 13_666 ?
Mg2 Eu2 Eu3 148.69(4) 3_665 13_666 ?
Eu4 Eu2 Eu3 87.905(16) 2 13_666 ?
Eu4 Eu2 Eu3 143.749(12) 3_665 13_666 ?
Eu1 Eu2 Eu3 91.246(15) . 13_666 ?
Eu5 Eu2 Eu3 107.359(17) 18_666 13_666 ?
Eu5 Eu2 Eu3 58.547(10) 16_556 13_666 ?
Eu2 Eu2 Eu3 144.894(10) 16_556 13_666 ?
Eu3 Eu2 Eu3 59.190(18) 14_566 13_666 ?
Cu1 Eu3 Cu1 153.59(4) 13_666 15_656 ?
Cu1 Eu3 Cu1 136.86(2) 13_666 3_665 ?
Cu1 Eu3 Cu1 48.01(4) 15_656 3_665 ?
Cu1 Eu3 Cu1 48.01(4) 13_666 . ?
Cu1 Eu3 Cu1 136.864(19) 15_656 . ?
Cu1 Eu3 Cu1 91.84(4) 3_665 . ?
Cu1 Eu3 Mg1 101.671(17) 13_666 4_665 ?
Cu1 Eu3 Mg1 101.671(17) 15_656 4_665 ?
Cu1 Eu3 Mg1 101.515(18) 3_665 4_665 ?
Cu1 Eu3 Mg1 101.514(18) . 4_665 ?
Cu1 Eu3 Eu5 101.57(2) 13_666 18_666 ?
Cu1 Eu3 Eu5 101.57(2) 15_656 18_666 ?
Cu1 Eu3 Eu5 63.653(19) 3_665 18_666 ?
Cu1 Eu3 Eu5 63.65(2) . 18_666 ?
Mg1 Eu3 Eu5 56.316(10) 4_665 18_666 ?
Cu1 Eu3 Eu5 122.51(2) 13_666 5_665 ?
Cu1 Eu3 Eu5 63.224(18) 15_656 5_665 ?
Cu1 Eu3 Eu5 100.61(2) 3_665 5_665 ?
Cu1 Eu3 Eu5 155.94(2) . 5_665 ?
Mg1 Eu3 Eu5 56.018(11) 4_665 5_665 ?
Eu5 Eu3 Eu5 103.638(18) 18_666 5_665 ?
Cu1 Eu3 Eu5 63.224(17) 13_666 4_665 ?
Cu1 Eu3 Eu5 122.51(2) 15_656 4_665 ?
Cu1 Eu3 Eu5 155.94(2) 3_665 4_665 ?
Cu1 Eu3 Eu5 100.61(2) . 4_665 ?
Mg1 Eu3 Eu5 56.018(11) 4_665 4_665 ?
Eu5 Eu3 Eu5 103.638(18) 18_666 4_665 ?
Eu5 Eu3 Eu5 60.978(17) 5_665 4_665 ?
Cu1 Eu3 Eu3 50.125(16) 13_666 2_655 ?
Cu1 Eu3 Eu3 109.418(17) 15_656 2_655 ?
Cu1 Eu3 Eu3 94.529(19) 3_665 2_655 ?
Cu1 Eu3 Eu3 50.251(16) . 2_655 ?
Mg1 Eu3 Eu3 148.210(2) 4_665 2_655 ?
Eu5 Eu3 Eu3 109.472(10) 18_666 2_655 ?
Eu5 Eu3 Eu3 146.886(11) 5_665 2_655 ?
Eu5 Eu3 Eu3 109.282(9) 4_665 2_655 ?
Cu1 Eu3 Eu3 109.417(16) 13_666 3_665 ?
Cu1 Eu3 Eu3 50.125(16) 15_656 3_665 ?
Cu1 Eu3 Eu3 50.251(16) 3_665 3_665 ?
Cu1 Eu3 Eu3 94.529(19) . 3_665 ?
Mg1 Eu3 Eu3 148.210(2) 4_665 3_665 ?
Eu5 Eu3 Eu3 109.472(10) 18_666 3_665 ?
Eu5 Eu3 Eu3 109.282(9) 5_665 3_665 ?
Eu5 Eu3 Eu3 146.886(11) 4_665 3_665 ?
Eu3 Eu3 Eu3 60.0 2_655 3_665 ?
Cu1 Eu3 Eu2 108.78(2) 13_666 15_656 ?
Cu1 Eu3 Eu2 49.02(2) 15_656 15_656 ?
Cu1 Eu3 Eu2 93.00(2) 3_665 15_656 ?
Cu1 Eu3 Eu2 140.70(2) . 15_656 ?
Mg1 Eu3 Eu2 115.587(11) 4_665 15_656 ?
Eu5 Eu3 Eu2 149.651(10) 18_666 15_656 ?
Eu5 Eu3 Eu2 59.683(12) 5_665 15_656 ?
Eu5 Eu3 Eu2 90.273(18) 4_665 15_656 ?
Eu3 Eu3 Eu2 90.475(8) 2_655 15_656 ?
Eu3 Eu3 Eu2 60.406(9) 3_665 15_656 ?
Cu1 Eu3 Eu2 49.02(2) 13_666 13_666 ?
Cu1 Eu3 Eu2 108.78(2) 15_656 13_666 ?
Cu1 Eu3 Eu2 140.70(2) 3_665 13_666 ?
Cu1 Eu3 Eu2 93.00(2) . 13_666 ?
Mg1 Eu3 Eu2 115.587(11) 4_665 13_666 ?
Eu5 Eu3 Eu2 149.651(10) 18_666 13_666 ?
Eu5 Eu3 Eu2 90.273(18) 5_665 13_666 ?
Eu5 Eu3 Eu2 59.683(12) 4_665 13_666 ?
Eu3 Eu3 Eu2 60.406(9) 2_655 13_666 ?
Eu3 Eu3 Eu2 90.475(8) 3_665 13_666 ?
Eu2 Eu3 Eu2 60.283(18) 15_656 13_666 ?
Mg2 Eu4 Mg2 175.77(8) 3 . ?
Mg2 Eu4 Eu2 60.31(3) 3 18_556 ?
Mg2 Eu4 Eu2 123.08(3) . 18_556 ?
Mg2 Eu4 Eu2 123.08(3) 3 2_655 ?
Mg2 Eu4 Eu2 60.31(3) . 2_655 ?
Eu2 Eu4 Eu2 93.57(2) 18_556 2_655 ?
Mg2 Eu4 Eu2 60.31(3) 3 3 ?
Mg2 Eu4 Eu2 123.08(3) . 3 ?
Eu2 Eu4 Eu2 61.29(2) 18_556 3 ?
Eu2 Eu4 Eu2 62.784(17) 2_655 3 ?
Mg2 Eu4 Eu2 123.08(3) 3 17_656 ?
Mg2 Eu4 Eu2 60.31(3) . 17_656 ?
Eu2 Eu4 Eu2 62.784(17) 18_556 17_656 ?
Eu2 Eu4 Eu2 61.29(2) 2_655 17_656 ?
Eu2 Eu4 Eu2 93.57(2) 3 17_656 ?
Mg2 Eu4 Eu4 57.89(4) 3 3 ?
Mg2 Eu4 Eu4 117.89(4) . 3 ?
Eu2 Eu4 Eu4 109.424(10) 18_556 3 ?
Eu2 Eu4 Eu4 148.589(10) 2_655 3 ?
Eu2 Eu4 Eu4 109.424(10) 3 3 ?
Eu2 Eu4 Eu4 148.589(10) 17_656 3 ?
Mg2 Eu4 Eu4 117.89(4) 3 2 ?
Mg2 Eu4 Eu4 57.89(4) . 2 ?
Eu2 Eu4 Eu4 148.589(10) 18_556 2 ?
Eu2 Eu4 Eu4 109.424(10) 2_655 2 ?
Eu2 Eu4 Eu4 148.589(10) 3 2 ?
Eu2 Eu4 Eu4 109.424(10) 17_656 2 ?
Eu4 Eu4 Eu4 60.0 3 2 ?
Mg2 Eu4 Eu5 119.738(17) 3 16_556 ?
Mg2 Eu4 Eu5 58.881(15) . 16_556 ?
Eu2 Eu4 Eu5 150.708(17) 18_556 16_556 ?
Eu2 Eu4 Eu5 60.898(11) 2_655 16_556 ?
Eu2 Eu4 Eu5 92.382(16) 3 16_556 ?
Eu2 Eu4 Eu5 110.133(14) 17_656 16_556 ?
Eu4 Eu4 Eu5 90.541(11) 3 16_556 ?
Eu4 Eu4 Eu5 60.176(11) 2 16_556 ?
Mg2 Eu4 Eu5 58.881(15) 3 3 ?
Mg2 Eu4 Eu5 119.738(17) . 3 ?
Eu2 Eu4 Eu5 60.898(11) 18_556 3 ?
Eu2 Eu4 Eu5 150.708(17) 2_655 3 ?
Eu2 Eu4 Eu5 110.133(14) 3 3 ?
Eu2 Eu4 Eu5 92.382(16) 17_656 3 ?
Eu4 Eu4 Eu5 60.176(11) 3 3 ?
Eu4 Eu4 Eu5 90.541(11) 2 3 ?
Eu5 Eu4 Eu5 147.28(2) 16_556 3 ?
Mg2 Eu4 Eu5 119.738(17) 3 . ?
Mg2 Eu4 Eu5 58.881(15) . . ?
Eu2 Eu4 Eu5 92.382(16) 18_556 . ?
Eu2 Eu4 Eu5 110.133(14) 2_655 . ?
Eu2 Eu4 Eu5 150.708(17) 3 . ?
Eu2 Eu4 Eu5 60.898(11) 17_656 . ?
Eu4 Eu4 Eu5 90.541(11) 3 . ?
Eu4 Eu4 Eu5 60.176(11) 2 . ?
Eu5 Eu4 Eu5 109.13(2) 16_556 . ?
Eu5 Eu4 Eu5 60.898(19) 3 . ?
Mg2 Eu4 Eu5 58.881(15) 3 18_556 ?
Mg2 Eu4 Eu5 119.738(17) . 18_556 ?
Eu2 Eu4 Eu5 110.133(14) 18_556 18_556 ?
Eu2 Eu4 Eu5 92.382(16) 2_655 18_556 ?
Eu2 Eu4 Eu5 60.898(11) 3 18_556 ?
Eu2 Eu4 Eu5 150.708(17) 17_656 18_556 ?
Eu4 Eu4 Eu5 60.176(11) 3 18_556 ?
Eu4 Eu4 Eu5 90.541(11) 2 18_556 ?
Eu5 Eu4 Eu5 60.898(19) 16_556 18_556 ?
Eu5 Eu4 Eu5 109.127(19) 3 18_556 ?
Eu5 Eu4 Eu5 147.28(2) . 18_556 ?
Mg1 Eu5 Mg2 172.32(6) . . ?
Mg1 Eu5 Eu1 128.35(2) . 16_556 ?
Mg2 Eu5 Eu1 59.33(6) . 16_556 ?
Mg1 Eu5 Eu3 61.565(16) . 17_656 ?
Mg2 Eu5 Eu3 126.11(6) . 17_656 ?
Eu1 Eu5 Eu3 66.785(17) 16_556 17_656 ?
Mg1 Eu5 Eu3 61.198(12) . 6_544 ?
Mg2 Eu5 Eu3 120.790(18) . 6_544 ?
Eu1 Eu5 Eu3 95.561(11) 16_556 6_544 ?
Eu3 Eu5 Eu3 62.874(12) 17_656 6_544 ?
Mg1 Eu5 Eu3 61.198(12) . 4_664 ?
Mg2 Eu5 Eu3 120.790(17) . 4_664 ?
Eu1 Eu5 Eu3 95.560(11) 16_556 4_664 ?
Eu3 Eu5 Eu3 62.874(12) 17_656 4_664 ?
Eu3 Eu5 Eu3 113.77(2) 6_544 4_664 ?
Mg1 Eu5 Eu4 116.527(17) . 2 ?
Mg2 Eu5 Eu4 57.18(5) . 2 ?
Eu1 Eu5 Eu4 107.829(16) 16_556 2 ?
Eu3 Eu5 Eu4 150.078(12) 17_656 2 ?
Eu3 Eu5 Eu4 145.419(16) 6_544 2 ?
Eu3 Eu5 Eu4 89.441(17) 4_664 2 ?
Mg1 Eu5 Eu4 116.526(17) . . ?
Mg2 Eu5 Eu4 57.18(5) . . ?
Eu1 Eu5 Eu4 107.830(16) 16_556 . ?
Eu3 Eu5 Eu4 150.078(12) 17_656 . ?
Eu3 Eu5 Eu4 89.440(17) 6_544 . ?
Eu3 Eu5 Eu4 145.419(16) 4_664 . ?
Eu4 Eu5 Eu4 59.65(2) 2 . ?
Mg1 Eu5 Eu2 122.835(9) . 16_556 ?
Mg2 Eu5 Eu2 59.17(2) . 16_556 ?
Eu1 Eu5 Eu2 61.135(9) 16_556 16_556 ?
Eu3 Eu5 Eu2 95.401(13) 17_656 16_556 ?
Eu3 Eu5 Eu2 154.074(15) 6_544 16_556 ?
Eu3 Eu5 Eu2 61.770(13) 4_664 16_556 ?
Eu4 Eu5 Eu2 59.280(12) 2 16_556 ?
Eu4 Eu5 Eu2 107.701(17) . 16_556 ?
Mg1 Eu5 Eu2 122.835(9) . 17_656 ?
Mg2 Eu5 Eu2 59.17(2) . 17_656 ?
Eu1 Eu5 Eu2 61.136(9) 16_556 17_656 ?
Eu3 Eu5 Eu2 95.401(13) 17_656 17_656 ?
Eu3 Eu5 Eu2 61.770(13) 6_544 17_656 ?
Eu3 Eu5 Eu2 154.074(15) 4_664 17_656 ?
Eu4 Eu5 Eu2 107.700(18) 2 17_656 ?
Eu4 Eu5 Eu2 59.280(12) . 17_656 ?
Eu2 Eu5 Eu2 110.021(17) 16_556 17_656 ?
Mg1 Eu5 Eu5 57.035(9) . 3 ?
Mg2 Eu5 Eu5 116.69(5) . 3 ?
Eu1 Eu5 Eu5 150.0 16_556 3 ?
Eu3 Eu5 Eu5 109.473(9) 17_656 3 ?
Eu3 Eu5 Eu5 59.511(8) 6_544 3 ?
Eu3 Eu5 Eu5 109.281(9) 4_664 3 ?
Eu4 Eu5 Eu5 89.459(11) 2 3 ?
Eu4 Eu5 Eu5 59.551(9) . 3 ?
Eu2 Eu5 Eu5 146.136(9) 16_556 3 ?
Eu2 Eu5 Eu5 90.636(8) 17_656 3 ?
Mg1 Eu5 Eu5 57.035(9) . 2 ?
Mg2 Eu5 Eu5 116.69(5) . 2 ?
Eu1 Eu5 Eu5 150.0 16_556 2 ?
Eu3 Eu5 Eu5 109.473(10) 17_656 2 ?
Eu3 Eu5 Eu5 109.281(8) 6_544 2 ?
Eu3 Eu5 Eu5 59.511(8) 4_664 2 ?
Eu4 Eu5 Eu5 59.551(9) 2 2 ?
Eu4 Eu5 Eu5 89.459(11) . 2 ?
Eu2 Eu5 Eu5 90.636(8) 16_556 2 ?
Eu2 Eu5 Eu5 146.136(9) 17_656 2 ?
Eu5 Eu5 Eu5 60.0 3 2 ?
Cu1 Cu1 Eu1 143.02(7) 13_666 . ?
Cu1 Cu1 Eu2 136.95(7) 13_666 . ?
Eu1 Cu1 Eu2 80.03(3) . . ?
Cu1 Cu1 Eu3 66.17(4) 13_666 14_566 ?
Eu1 Cu1 Eu3 135.67(2) . 14_566 ?
Eu2 Cu1 Eu3 81.37(3) . 14_566 ?
Cu1 Cu1 Eu3 66.17(4) 13_666 13_666 ?
Eu1 Cu1 Eu3 135.67(2) . 13_666 ?
Eu2 Cu1 Eu3 81.37(3) . 13_666 ?
Eu3 Cu1 Eu3 79.75(3) 14_566 13_666 ?
Cu1 Cu1 Eu3 65.83(4) 13_666 2_655 ?
Eu1 Cu1 Eu3 86.31(3) . 2_655 ?
Eu2 Cu1 Eu3 138.025(19) . 2_655 ?
Eu3 Cu1 Eu3 131.99(4) 14_566 2_655 ?
Eu3 Cu1 Eu3 81.32(2) 13_666 2_655 ?
Cu1 Cu1 Eu3 65.83(4) 13_666 . ?
Eu1 Cu1 Eu3 86.31(3) . . ?
Eu2 Cu1 Eu3 138.026(19) . . ?
Eu3 Cu1 Eu3 81.32(2) 14_566 . ?
Eu3 Cu1 Eu3 131.99(4) 13_666 . ?
Eu3 Cu1 Eu3 79.50(3) 2_655 . ?
Eu2 Cu2 Eu2 135.153(8) . 18_566 ?
Eu2 Cu2 Eu2 82.706(17) . 2_665 ?
Eu2 Cu2 Eu2 135.153(8) 18_566 2_665 ?
Eu2 Cu2 Eu2 82.706(17) . 3_565 ?
Eu2 Cu2 Eu2 80.56(2) 18_566 3_565 ?
Eu2 Cu2 Eu2 82.706(17) 2_665 3_565 ?
Eu2 Cu2 Eu2 135.153(8) . 17_666 ?
Eu2 Cu2 Eu2 82.706(17) 18_566 17_666 ?
Eu2 Cu2 Eu2 80.56(2) 2_665 17_666 ?
Eu2 Cu2 Eu2 135.153(8) 3_565 17_666 ?
Eu2 Cu2 Eu2 80.56(2) . 16_556 ?
Eu2 Cu2 Eu2 82.706(17) 18_566 16_556 ?
Eu2 Cu2 Eu2 135.153(8) 2_665 16_556 ?
Eu2 Cu2 Eu2 135.153(8) 3_565 16_556 ?
Eu2 Cu2 Eu2 82.706(17) 17_666 16_556 ?
Eu5 Mg1 Eu5 180.000(13) 13 . ?
Eu5 Mg1 Eu5 65.930(17) 13 14 ?
Eu5 Mg1 Eu5 114.070(17) . 14 ?
Eu5 Mg1 Eu5 114.070(17) 13 2 ?
Eu5 Mg1 Eu5 65.930(17) . 2 ?
Eu5 Mg1 Eu5 180.0 14 2 ?
Eu5 Mg1 Eu5 65.930(17) 13 15 ?
Eu5 Mg1 Eu5 114.070(17) . 15 ?
Eu5 Mg1 Eu5 65.930(17) 14 15 ?
Eu5 Mg1 Eu5 114.070(17) 2 15 ?
Eu5 Mg1 Eu5 114.070(17) 13 3 ?
Eu5 Mg1 Eu5 65.930(17) . 3 ?
Eu5 Mg1 Eu5 114.070(17) 14 3 ?
Eu5 Mg1 Eu5 65.930(17) 2 3 ?
Eu5 Mg1 Eu5 180.000(17) 15 3 ?
Eu5 Mg1 Eu3 62.784(6) 13 16_446 ?
Eu5 Mg1 Eu3 117.216(6) . 16_446 ?
Eu5 Mg1 Eu3 62.784(6) 14 16_446 ?
Eu5 Mg1 Eu3 117.216(6) 2 16_446 ?
Eu5 Mg1 Eu3 117.882(14) 15 16_446 ?
Eu5 Mg1 Eu3 62.118(14) 3 16_446 ?
Eu5 Mg1 Eu3 117.216(6) 13 4_664 ?
Eu5 Mg1 Eu3 62.784(6) . 4_664 ?
Eu5 Mg1 Eu3 117.216(6) 14 4_664 ?
Eu5 Mg1 Eu3 62.784(6) 2 4_664 ?
Eu5 Mg1 Eu3 62.118(14) 15 4_664 ?
Eu5 Mg1 Eu3 117.882(14) 3 4_664 ?
Eu3 Mg1 Eu3 180.000(15) 16_446 4_664 ?
Eu5 Mg1 Eu3 117.882(15) 13 17_656 ?
Eu5 Mg1 Eu3 62.118(14) . 17_656 ?
Eu5 Mg1 Eu3 62.784(6) 14 17_656 ?
Eu5 Mg1 Eu3 117.216(6) 2 17_656 ?
Eu5 Mg1 Eu3 62.784(6) 15 17_656 ?
Eu5 Mg1 Eu3 117.216(6) 3 17_656 ?
Eu3 Mg1 Eu3 116.421(4) 16_446 17_656 ?
Eu3 Mg1 Eu3 63.579(4) 4_664 17_656 ?
Eu5 Mg1 Eu3 62.118(14) 13 5_454 ?
Eu5 Mg1 Eu3 117.882(15) . 5_454 ?
Eu5 Mg1 Eu3 117.216(6) 14 5_454 ?
Eu5 Mg1 Eu3 62.784(6) 2 5_454 ?
Eu5 Mg1 Eu3 117.216(6) 15 5_454 ?
Eu5 Mg1 Eu3 62.784(6) 3 5_454 ?
Eu3 Mg1 Eu3 63.579(4) 16_446 5_454 ?
Eu3 Mg1 Eu3 116.421(4) 4_664 5_454 ?
Eu3 Mg1 Eu3 180.000(13) 17_656 5_454 ?
Eu5 Mg1 Eu3 62.784(6) 13 18_566 ?
Eu5 Mg1 Eu3 117.216(6) . 18_566 ?
Eu5 Mg1 Eu3 117.882(14) 14 18_566 ?
Eu5 Mg1 Eu3 62.118(14) 2 18_566 ?
Eu5 Mg1 Eu3 62.784(6) 15 18_566 ?
Eu5 Mg1 Eu3 117.216(6) 3 18_566 ?
Eu3 Mg1 Eu3 116.421(5) 16_446 18_566 ?
Eu3 Mg1 Eu3 63.579(5) 4_664 18_566 ?
Eu3 Mg1 Eu3 116.421(4) 17_656 18_566 ?
Eu3 Mg1 Eu3 63.579(5) 5_454 18_566 ?
Eu5 Mg1 Eu3 117.216(6) 13 6_544 ?
Eu5 Mg1 Eu3 62.784(6) . 6_544 ?
Eu5 Mg1 Eu3 62.118(14) 14 6_544 ?
Eu5 Mg1 Eu3 117.882(14) 2 6_544 ?
Eu5 Mg1 Eu3 117.216(6) 15 6_544 ?
Eu5 Mg1 Eu3 62.784(6) 3 6_544 ?
Eu3 Mg1 Eu3 63.579(5) 16_446 6_544 ?
Eu3 Mg1 Eu3 116.421(5) 4_664 6_544 ?
Eu3 Mg1 Eu3 63.579(5) 17_656 6_544 ?
Eu3 Mg1 Eu3 116.421(4) 5_454 6_544 ?
Eu3 Mg1 Eu3 180.000(13) 18_566 6_544 ?
Mg2 Mg2 Mg2 60.000(1) 3_665 2_655 ?
Mg2 Mg2 Eu4 117.89(4) 3_665 2 ?
Mg2 Mg2 Eu4 177.89(4) 2_655 2 ?
Mg2 Mg2 Eu4 177.89(4) 3_665 . ?
Mg2 Mg2 Eu4 117.89(4) 2_655 . ?
Eu4 Mg2 Eu4 64.23(8) 2 . ?
Mg2 Mg2 Eu1 64.40(5) 3_665 16_556 ?
Mg2 Mg2 Eu1 64.40(5) 2_655 16_556 ?
Eu4 Mg2 Eu1 115.00(4) 2 16_556 ?
Eu4 Mg2 Eu1 115.00(4) . 16_556 ?
Mg2 Mg2 Eu1 64.40(5) 3_665 . ?
Mg2 Mg2 Eu1 64.40(5) 2_655 . ?
Eu4 Mg2 Eu1 115.00(4) 2 . ?
Eu4 Mg2 Eu1 115.00(4) . . ?
Eu1 Mg2 Eu1 120.13(12) 16_556 . ?
Mg2 Mg2 Eu5 116.69(5) 3_665 . ?
Mg2 Mg2 Eu5 116.69(5) 2_655 . ?
Eu4 Mg2 Eu5 63.94(6) 2 . ?
Eu4 Mg2 Eu5 63.94(6) . . ?
Eu1 Mg2 Eu5 61.182(17) 16_556 . ?
Eu1 Mg2 Eu5 178.69(12) . . ?
Mg2 Mg2 Eu5 116.69(5) 3_665 16_556 ?
Mg2 Mg2 Eu5 116.69(5) 2_655 16_556 ?
Eu4 Mg2 Eu5 63.94(6) 2 16_556 ?
Eu4 Mg2 Eu5 63.94(6) . 16_556 ?
Eu1 Mg2 Eu5 178.69(12) 16_556 16_556 ?
Eu1 Mg2 Eu5 61.182(17) . 16_556 ?
Eu5 Mg2 Eu5 117.51(12) . 16_556 ?
Mg2 Mg2 Eu2 64.94(7) 3_665 . ?
Mg2 Mg2 Eu2 115.43(7) 2_655 . ?
Eu4 Mg2 Eu2 62.85(4) 2 . ?
Eu4 Mg2 Eu2 116.78(10) . . ?
Eu1 Mg2 Eu2 117.01(6) 16_556 . ?
Eu1 Mg2 Eu2 63.21(2) . . ?
Eu5 Mg2 Eu2 116.40(6) . . ?
Eu5 Mg2 Eu2 63.38(2) 16_556 . ?
Mg2 Mg2 Eu2 64.94(7) 3_665 16_556 ?
Mg2 Mg2 Eu2 115.43(7) 2_655 16_556 ?
Eu4 Mg2 Eu2 62.85(4) 2 16_556 ?
Eu4 Mg2 Eu2 116.78(10) . 16_556 ?
Eu1 Mg2 Eu2 63.21(2) 16_556 16_556 ?
Eu1 Mg2 Eu2 117.01(6) . 16_556 ?
Eu5 Mg2 Eu2 63.38(2) . 16_556 ?
Eu5 Mg2 Eu2 116.40(6) 16_556 16_556 ?
Eu2 Mg2 Eu2 62.943(19) . 16_556 ?
Mg2 Mg2 Eu2 115.43(7) 3_665 17_656 ?
Mg2 Mg2 Eu2 64.94(7) 2_655 17_656 ?
Eu4 Mg2 Eu2 116.78(10) 2 17_656 ?
Eu4 Mg2 Eu2 62.85(4) . 17_656 ?
Eu1 Mg2 Eu2 63.21(2) 16_556 17_656 ?
Eu1 Mg2 Eu2 117.01(6) . 17_656 ?
Eu5 Mg2 Eu2 63.38(2) . 17_656 ?
Eu5 Mg2 Eu2 116.40(6) 16_556 17_656 ?
Eu2 Mg2 Eu2 179.61(14) . 17_656 ?
Eu2 Mg2 Eu2 117.055(19) 16_556 17_656 ?
Mg2 Mg2 Eu2 115.43(7) 3_665 2_655 ?
Mg2 Mg2 Eu2 64.94(7) 2_655 2_655 ?
Eu4 Mg2 Eu2 116.78(10) 2 2_655 ?
Eu4 Mg2 Eu2 62.85(4) . 2_655 ?
Eu1 Mg2 Eu2 117.01(6) 16_556 2_655 ?
Eu1 Mg2 Eu2 63.21(2) . 2_655 ?
Eu5 Mg2 Eu2 116.40(6) . 2_655 ?
Eu5 Mg2 Eu2 63.38(2) 16_556 2_655 ?
Eu2 Mg2 Eu2 117.056(18) . 2_655 ?
Eu2 Mg2 Eu2 179.61(14) 16_556 2_655 ?
Eu2 Mg2 Eu2 62.944(18) 17_656 2_655 ?
 
_refine_diff_density_max    1.587
_refine_diff_density_min   -1.358
_refine_diff_density_rms    0.241

_shelx_res_file
;
TITL PS_34_ECM_a_3_Eu23Cu7Mg4_0m_a.res in P6(3)/mmc
    PS_34_ECM_a_3_Eu23Cu7Mg4_0m_a.res
    created by SHELXL-2019/1 at 12:13:49 on 01-Jun-2023
REM Old TITL Integration of PS_34_ECM_a_3_Eu23Cu7Mg4
REM SHELXT solution in P6(3)/mmc: R1 0.049, Rweak 0.003, Alpha 0.010
REM <I/s>   0.576 for   87 systematic absences,  Orientation as input
REM Formula found by SHELXT:  Cu7 Eu23 Mg4

CELL  0.71076  10.6591  10.6591  24.3792   90.000   90.000  120.000
ZERR    2.000   0.0020   0.0020   0.0050    0.030    0.030    0.030
LATT  1
SYMM -Y, X-Y, Z
SYMM -X+Y, -X, Z
SYMM -X, -Y, 1/2+Z
SYMM Y, -X+Y, 1/2+Z
SYMM X-Y, X, 1/2+Z
SYMM Y, X, -Z
SYMM X-Y, -Y, -Z
SYMM -X, -X+Y, -Z
SYMM -Y, -X, 1/2-Z
SYMM -X+Y, Y, 1/2-Z
SYMM X, X-Y, 1/2-Z
SFAC CU EU MG
UNIT 14 46 8
L.S. 10
BOND
LIST 4
omit 0 1 1
acta
FMAP 2
PLAN 20
WGHT    0.014500   41.592098
FVAR       0.06276
EU1   2    0.666667    0.333333    0.383904    10.16667    0.02140    0.02140 =
         0.02340    0.00000    0.00000    0.01070
EU2   2    0.461607    0.538393    0.332319    10.50000    0.02601    0.02601 =
         0.02059    0.00186   -0.00186    0.01338
EU3   2    0.792831    0.585662    0.530620    10.50000    0.02226    0.02568 =
         0.02655   -0.00046   -0.00023    0.01284
EU4   2    0.123159   -0.123159    0.250000    10.25000    0.02506    0.02506 =
         0.02555    0.00000    0.00000    0.00995
EU5   2    0.250992    0.125496    0.117676    10.50000    0.02857    0.02832 =
         0.02630   -0.00225   -0.00450    0.01429
CU1   1    0.524920    0.475080    0.450933    10.50000    0.03989    0.03989 =
         0.02280    0.00002   -0.00002    0.02769
CU2   1    0.333333    0.666667    0.250000    10.08333    0.03675    0.03675 =
         0.01966    0.00000    0.00000    0.01837
MG1   3    0.000000    0.000000    0.000000    10.08333    0.02242    0.02242 =
         0.03154    0.00000    0.00000    0.01121
MG2   3    0.463029    0.231515    0.250000    10.25000    0.02639    0.02498 =
         0.02544    0.00000    0.00000    0.01319
HKLF 4


REM  PS_34_ECM_a_3_Eu23Cu7Mg4_0m_a.res in P6(3)/mmc
REM wR2 = 0.0524, GooF = S = 0.978, Restrained GooF = 0.978 for all data
REM R1 = 0.0259 for 1120 Fo > 4sig(Fo) and 0.0445 for all 1435 data
REM 40 parameters refined using 0 restraints

END

WGHT      0.0201     18.1291

REM Highest difference peak  1.587,  deepest hole -1.358,  1-sigma level  0.241
Q1    1   0.4688  0.5312  0.3638  10.50000  0.05    1.59
Q2    1   0.4613  0.5387  0.3026  10.50000  0.05    1.36
Q3    1   0.7800  0.5600  0.5005  10.50000  0.05    1.33
Q4    1   0.6667  0.3333  0.4147  10.16667  0.05    1.16
Q5    1   0.6667  0.3333  0.2500  10.08333  0.05    0.98
Q6    1   0.5646  0.5836  0.3407  11.00000  0.05    0.97
Q7    1   0.6667  0.3333  0.4828  10.16667  0.05    0.93
Q8    1   0.3589  0.3998  0.4064  11.00000  0.05    0.91
Q9    1   0.3434  0.1717  0.2303  10.50000  0.05    0.89
Q10   1   0.0856 -0.0856  0.2500  10.25000  0.05    0.86
Q11   1   0.4578  0.5422  0.2677  10.50000  0.05    0.86
Q12   1   0.1176 -0.1176  0.2176  10.50000  0.05    0.86
Q13   1   0.0000  0.0000  0.2500  10.08333  0.05    0.85
Q14   1   0.8663  0.7326  0.4954  10.50000  0.05    0.83
Q15   1   0.6667  0.3333  0.3460  10.16667  0.05    0.82
Q16   1   0.0528  0.1057  0.0794  10.50000  0.05    0.82
Q17   1   0.2292  0.1146  0.1517  10.50000  0.05    0.81
Q18   1   0.4618  0.5382  0.3995  10.50000  0.05    0.79
Q19   1   0.5639  0.5505  0.2500  10.50000  0.05    0.78
Q20   1   0.2388  0.2589  0.1348  11.00000  0.05    0.77
;
_shelx_res_checksum   34709

_shelx_hkl_file
;
   2  -1   0   72.20    5.99
   2  -1   0   59.49    6.65
   2  -1   0   67.98    6.45
   2  -1   0   74.98    5.88
   1  -2   0   80.96    4.82
   1  -2   0   71.15    4.28
   1   1   0   82.96    4.43
   1   1   0   64.89    5.21
   1   1   0   70.23    5.96
   1   1   0   82.85    8.37
   1   1   0   58.31    6.82
   1   1   0   60.43    5.45
   2  -1   0   71.23    5.93
   1  -2   0   70.01    7.81
  -1  -1   0   79.73    7.36
  -1   2   0   72.68    5.52
   1  -2   0   72.87    6.88
   1  -2   0   69.25    5.35
   1  -2   0   76.30    6.48
  -1  -1   0   85.06    5.05
  -1  -1   0   71.34    5.19
  -1  -1   0   70.21    6.35
  -1  -1   0   93.78    8.44
  -2   1   0   56.79    6.09
  -2   1   0   74.52    8.70
  -2   1   0   77.46    6.38
  -2   1   0   75.56    5.87
  -2   1   0   82.83    7.85
   0   2   0    7.88    4.87
   2   0   0    5.39    3.88
   2   0   0   12.01    4.29
   2   0   0    9.01    5.15
  -2   0   0   18.62    6.55
   2  -2   0   10.96    4.54
   2  -2   0    8.31    7.52
   2  -2   0    9.33    4.43
   2   0   0    3.97    5.22
   2   0   0   10.67    6.90
  -2   0   0   14.87    5.62
  -2   0   0   15.61    4.55
  -2   0   0   16.96    4.54
  -2   0   0    6.82    4.83
   0   2   0   10.02    4.73
  -2   2   0   11.38    4.32
   0  -2   0   -0.46    3.22
   0  -2   0   10.24    2.23
   0  -2   0   11.87    3.76
   0  -2   0    3.18    4.10
   0  -2   0   17.31    5.74
   0  -2   0    4.72    4.28
   0  -2   0    7.26    2.84
   0   2   0    4.30    3.91
  -2   0   0   13.50    3.72
  -2   2   0    9.44    7.65
  -2   2   0   11.44    4.38
  -2   2   0    5.19    4.67
   2   0   0   11.68    5.12
   0   2   0   14.48    2.92
   2  -2   0   18.92    6.59
   2  -2   0   11.04    3.61
  -3   2   0  336.17   13.32
  -1   3   0  306.57   16.96
  -1   3   0  303.62   12.50
  -1   3   0  323.74   11.24
   1  -3   0  333.41   15.84
  -3   2   0  339.77   19.55
   3  -2   0  333.96   13.81
   3  -2   0  303.72   13.67
  -1   3   0  325.97   13.04
  -1  -2   0  319.08   13.60
   1   2   0  315.85   14.04
   1   2   0  320.12   15.49
   1   2   0  326.94   13.23
   2  -3   0  346.89   18.51
  -3   1   0  358.56   19.05
  -3   1   0  326.82   13.91
  -3   1   0  312.15   13.70
  -3   1   0  300.41   16.48
  -3   1   0  337.74   17.90
  -3   1   0  293.86   13.93
  -2   3   0  287.82   18.74
  -2   3   0  336.96   16.51
  -1  -2   0  331.22   14.17
  -1  -2   0  335.41   14.37
   3  -2   0  323.23   18.56
   3  -2   0  314.37   16.19
   3  -2   0  313.03   13.57
   2  -3   0  313.04   15.78
   2  -3   0  311.16   12.37
   3  -1   0  319.46   18.44
   3  -1   0  324.29   14.32
   3  -1   0  312.09   13.67
  -3   2   0  308.54   14.17
  -3   2   0  312.64   18.52
   1  -3   0  327.11   13.19
   1  -3   0  320.75   12.99
   1  -3   0  317.84   11.99
   2   1   0  334.09   12.89
   2   1   0  344.80   14.77
   2   1   0  312.65   17.22
   2   1   0  308.13   18.50
   2   1   0  315.59   13.76
   3  -2   0  339.76   19.82
   3  -1   0  370.85   18.52
   3  -1   0  316.70   14.18
  -2  -1   0  308.45   15.37
  -2  -1   0  330.92   14.25
  -3   2   0  315.82   15.85
  -2  -1   0  304.65   14.56
  -2  -1   0  331.33   14.42
  -2  -1   0  317.44   14.07
   3  -1   0  325.37   16.70
  -1  -2   0  339.75   16.25
  -1  -2   0  355.24   17.15
  -3   0   0 2784.23   98.26
  -3   0   0 3019.62   97.37
   0  -3   0 2989.17   97.47
   0  -3   0 3023.67   95.92
   0  -3   0 3031.55   94.77
   0   3   0 2960.17   95.05
   3  -3   0 2973.37  100.66
   3  -3   0 2863.03   95.99
   3   0   0 3106.61   95.56
   3   0   0 2968.69   97.30
   3   0   0 3038.41   98.79
   3   0   0 2911.72   95.78
   3   0   0 3102.85   96.48
  -3   3   0 3090.20   99.72
  -3   3   0 3068.48   94.81
  -3   3   0 3037.59   96.22
  -3   3   0 3091.38   95.04
   0  -3   0 3035.64   94.18
   0  -3   0 3098.44   96.07
  -3   0   0 3073.44   97.95
  -3   0   0 3016.37   95.37
   0  -3   0 2947.33   95.19
  -3   0   0 2895.76   95.74
   0  -3   0 2998.68   93.43
   3  -3   0 3050.18   95.50
   0   3   0 3019.15   97.49
   0   3   0 2996.28   96.15
   0   3   0 3063.15   94.28
   3  -3   0 2935.39   99.11
   3  -3   0 3127.66   94.94
   3   0   0 3001.53   95.81
  -4   2   0 5368.78  169.17
  -2  -2   0 4946.80  169.43
  -4   2   0 5367.84  173.87
   2  -4   0 5531.65  174.43
   2  -4   0 5439.15  168.08
  -2  -2   0 5454.55  169.89
   2   2   0 5518.80  167.54
   2   2   0 5587.54  169.97
   2   2   0 5591.37  169.72
   2   2   0 5521.79  171.55
  -4   2   0 5454.39  169.42
   2  -4   0 5441.35  167.84
   4  -2   0 5448.27  171.74
   2  -4   0 5495.23  171.54
   2  -4   0 5519.67  168.62
   2  -4   0 5353.69  170.58
  -2  -2   0 5499.73  169.76
   2   2   0 5606.55  169.59
  -4   2   0 5319.50  173.02
  -4   2   0 5501.83  171.64
   4  -2   0 5461.71  169.38
   4  -2   0 5428.82  172.98
  -2  -2   0 5368.81  169.71
   2   2   0 5304.66  172.32
   4  -2   0 4998.73  173.02
   4  -2   0 5487.21  169.58
  -2  -2   0 5280.76  172.15
  -2  -2   0 5382.31  171.31
   4  -2   0 5256.31  169.74
   3   1   0  147.69    9.38
  -1  -3   0  134.58    9.71
  -1  -3   0  158.62   12.95
  -1  -3   0  147.46   13.40
  -4   1   0  134.95   10.17
  -3  -1   0  129.00   12.62
  -3  -1   0  140.24   10.84
  -3  -1   0  147.04   10.40
  -4   3   0  128.11    9.17
  -4   3   0  128.40   10.92
   4  -1   0  129.07   10.34
  -3  -1   0  136.47   10.35
   1   3   0  153.42   10.82
   3   1   0  155.74   10.37
   4  -3   0  124.86   13.10
  -4   1   0  103.01   12.17
  -1   4   0  134.31    9.10
  -3  -1   0  135.70   13.21
   1  -4   0  129.33   10.94
   1  -4   0  137.48    9.35
   1  -4   0  140.99   13.75
   1  -4   0  140.98    9.37
   1  -4   0  148.93    8.36
  -4   3   0  128.01   13.44
   3   1   0  151.66   10.24
  -1  -3   0  137.88   10.58
  -1  -3   0  125.68    9.86
  -3  -1   0  125.77   12.41
  -1   4   0  136.92   13.04
   4  -3   0  143.45   10.04
  -4   1   0  151.45   10.21
  -4   1   0  138.34   13.44
  -4   1   0  145.52   13.17
  -3   4   0  102.20    9.71
  -4   3   0  149.79   16.37
  -4   3   0  147.56   11.72
   3   1   0  125.30   13.60
   4  -3   0  155.97   12.02
   4  -3   0  130.51    9.93
  -1   4   0  149.68    8.64
   1   3   0  124.08   10.04
   1   3   0  138.39   12.05
   1   3   0  135.62   12.35
   1   3   0  154.45    9.10
   3  -4   0  108.91   11.97
   3  -4   0  153.37    9.49
   3  -4   0  159.89   12.69
   3  -4   0  150.49    8.85
   4  -1   0  156.36   15.18
   4  -1   0  135.24   10.70
   4  -3   0  141.72   10.37
   4  -1   0  115.69   13.33
   4  -1   0  145.72   12.83
   4  -1   0  139.28   10.60
   3   1   0  122.38   13.76
   4  -3   0  154.49   16.03
  -1   4   0  135.55    6.66
  -4   0   0    0.50    6.57
   0   4   0    3.00    5.94
   4   0   0   -1.92    7.03
   0  -4   0    4.91    5.46
   0  -4   0   -1.60    7.03
   4  -4   0    6.95    4.46
   4  -4   0    0.17    6.14
   0   4   0    6.89    3.48
  -4   0   0   -0.84    5.32
   0  -4   0    6.63    4.92
   0  -4   0    0.41    3.31
   0  -4   0    8.28    2.49
  -4   0   0   -2.46    5.09
  -4   0   0   -0.53    8.24
   4   0   0   11.40    6.75
  -4   4   0    2.37    8.84
   4  -4   0   17.77    9.79
  -4   4   0   10.31    5.23
  -4   0   0    8.54    7.93
   0  -4   0    6.98    5.53
   0   4   0    5.30    4.73
   0   4   0    6.30    6.62
   0  -4   0   15.31    5.24
  -4   4   0    4.03    4.31
  -4   4   0    0.63    6.52
  -4   0   0    5.76    5.10
   4   0   0   -0.56    5.59
   4   0   0    6.58    5.03
   4  -4   0    4.52   10.36
   4   0   0    3.02    9.03
   4   0   0    2.66    6.08
   4  -4   0   10.14    5.42
   3   2   0    8.96    5.06
   3  -5   0    3.76    6.62
   3   2   0   -2.07    7.65
  -3  -2   0    3.74    4.65
   5  -2   0    3.85    5.98
   2  -5   0    5.01    6.29
   3   2   0   -1.40    3.37
   5  -3   0   -0.29    8.54
   5  -3   0    8.55    7.13
   5  -3   0    3.60    5.45
  -5   2   0    1.40    5.32
  -5   2   0    4.34    8.09
   2   3   0   -2.38    6.51
  -5   3   0   -9.31    5.01
  -5   3   0    6.62    8.93
  -5   3   0    8.75    7.11
  -5   2   0    5.77    5.05
  -5   3   0    0.68    8.44
   5  -2   0   13.01    9.02
   2  -5   0   -1.31    3.42
   5  -2   0   -8.33    4.94
   5  -2   0    3.55    7.81
   3   2   0    6.40    5.55
   3  -5   0    3.54    4.46
  -3  -2   0   -5.59    7.12
  -3  -2   0    0.35    7.94
   2   3   0    0.08    2.16
  -2   5   0   -2.31    4.23
   2  -5   0   -7.11    6.09
   2  -5   0    2.09    4.64
   3  -5   0   -0.75    9.01
   3  -5   0    5.22    3.93
   3   2   0    4.91    4.86
   2   3   0    0.46    5.40
   2   3   0    6.08    5.27
  -5   2   0    1.69    7.64
   5  -2   0   -0.44    7.62
   5  -2   0    9.82    6.96
  -5   2   0    4.77    4.89
  -2  -3   0   20.72    6.46
  -2  -3   0   16.75    7.97
   3   2   0    5.37    8.77
  -2  -3   0    2.50    5.21
  -2  -3   0   -1.76    8.47
   5  -3   0   -1.29    9.18
   5  -3   0   -5.19    5.13
   5  -3   0    2.25    5.42
  -5   2   0   -4.41    8.55
   2  -5   0    8.02    8.69
   2  -5   0   -2.53    3.77
   2   3   0   -1.49    4.64
   3  -5   0    9.76    7.80
  -5   3   0    0.00    4.51
  -3  -2   0    4.30    5.51
  -2  -3   0    2.19    5.12
  -3  -2   0    2.05    5.28
  -3  -2   0    2.91    5.59
   1  -5   0   82.34    9.15
   1  -5   0  126.34    9.55
  -1  -4   0  113.97   11.12
   4  -5   0  135.38    9.07
   1   4   0  122.18   10.22
   1   4   0  116.26   11.98
   4  -5   0  119.11   13.06
   4  -5   0  113.07    9.03
   1  -5   0  112.84   10.01
  -5   4   0  115.01    9.09
   4   1   0  124.23   14.49
   4   1   0  113.22   13.08
   4   1   0  160.83   12.62
   5  -1   0  121.13   14.01
   5  -1   0  113.53   12.53
  -5   4   0  111.85   13.54
  -1   5   0  124.75    6.56
   5  -1   0  113.35   11.51
   5  -1   0  145.90   11.40
   5  -1   0   98.79    8.82
   5  -4   0  121.75   10.23
  -1   5   0  103.07   12.04
   5  -1   0  114.74   10.61
  -5   1   0  107.90   12.75
  -5   1   0  134.42   10.71
  -5   1   0   99.08    8.77
   1   4   0  121.44    8.72
  -5   1   0  106.77   12.75
   1  -5   0  118.70    8.59
   4  -5   0  143.70   12.02
   4  -5   0  129.69   16.31
  -5   4   0  119.13    9.73
  -4   5   0  126.80   11.82
  -1  -4   0  134.81   10.62
  -1  -4   0   92.21    8.67
  -1  -4   0  133.37   14.25
   1   4   0  141.15   11.56
   1  -5   0  111.99   12.88
   5  -4   0  134.17   15.82
   1  -5   0  118.40    8.99
  -1   5   0  129.20    9.65
  -4  -1   0  128.30   11.06
  -5   4   0  122.96   10.42
  -5   1   0  122.65   13.68
   4   1   0  107.60    9.49
   4   1   0   96.45    8.88
  -4  -1   0  106.07    9.05
  -4  -1   0  126.72   12.49
  -4  -1   0  115.42   13.42
   5  -4   0  105.28   13.34
   4   1   0  116.35    9.75
  -5   1   0  134.95   10.78
  -1   5   0  123.43    8.39
  -1  -4   0  130.97   10.06
   1  -5   0  117.10   10.11
   5  -4   0  140.93   10.42
   5  -4   0  112.15    9.66
  -4  -1   0  131.79   11.66
   5  -4   0  128.65   11.12
   5  -5   0  308.93   16.96
   5  -5   0  302.06   23.71
  -5   0   0  295.75   15.90
  -5   0   0  307.35   20.83
   5   0   0  293.47   21.73
   0   5   0  308.28   15.03
   0   5   0  287.37   15.29
   5   0   0  304.57   16.24
   0   5   0  292.72   18.42
   0  -5   0  292.80   15.86
   5  -5   0  277.83   22.20
   5  -5   0  295.75   14.65
   5   0   0  305.35   18.55
  -5   0   0  303.89   18.44
  -5   0   0  307.60   21.28
  -5   0   0  301.18   16.24
  -5   5   0  341.63   17.83
  -5   5   0  325.30   13.95
   0  -5   0  321.03   11.68
   0  -5   0  322.63   11.18
   0   5   0  312.88   12.89
  -5   0   0  329.83   16.03
   5   0   0  307.70   19.34
   5   0   0  283.34   15.61
   5   0   0  312.97   17.32
   0  -5   0  294.54   19.03
   0  -5   0  291.50   15.16
   3   3   0 9511.75  291.62
   6  -3   0 9385.62  300.16
   3  -6   0 9686.59  297.26
  -3  -3   0 9395.64  297.54
   6  -3   0 9460.29  294.76
  -3  -3   0 9302.77  295.48
   3  -6   0 9587.45  302.79
  -6   3   0 9634.42  294.68
   6  -3   0 9573.45  295.31
   6  -3   0 9385.15  295.59
   3   3   0 9098.73  298.49
  -3  -3   0 9548.29  297.22
  -6   3   0 9385.10  301.16
  -6   3   0 9705.91  295.04
   3   3   0 9505.91  297.96
   6  -3   0 9694.29  297.73
   3  -6   0 9312.12  293.45
   3  -6   0 9521.00  293.88
   3   3   0 9455.00  294.80
   6  -3   0 8429.82  303.03
  -3  -3   0 9999.00  299.11
  -3  -3   0 9227.30  295.38
   3   3   0 9501.40  297.54
   3  -6   0 9082.12  296.28
  -6   3   0 9456.73  297.37
   3   3   0 9645.34  295.28
   4  -6   0   45.04    5.19
  -6   4   0   41.23    6.29
  -2   6   0   38.06    5.91
   6  -4   0   44.33    7.48
   4  -6   0   25.43   11.42
   6  -2   0   33.82    9.79
   4  -6   0   33.19    9.42
   4   2   0   41.06    7.28
   6  -4   0   63.85    7.95
  -2  -4   0   36.83    8.88
   6  -2   0   50.58    7.90
   4   2   0   46.63   10.57
  -6   2   0   36.67   11.07
   2  -6   0   34.13    7.77
   6  -4   0   29.51   11.04
   6  -2   0   37.96    6.61
   2  -6   0   32.23    7.35
   4  -6   0   37.81    5.92
   4  -6   0   29.34    5.51
  -2  -4   0   37.00    7.09
  -2  -4   0   49.27   11.53
   2  -6   0   41.65   10.54
   4  -6   0   21.72    8.16
  -6   4   0   39.45   10.64
   2  -6   0   55.51    5.83
   6  -2   0   60.81   11.04
   6  -2   0   64.22   11.37
  -6   4   0   36.09    7.26
   4   2   0   47.81    5.63
   4   2   0   31.48    6.86
   4   2   0   45.83    7.35
   4   2   0   69.91   12.88
  -4  -2   0   28.35    5.68
  -6   4   0   43.99   13.10
   2  -6   0   44.73    6.53
   2   4   0   27.83    7.20
   2   4   0   43.83    7.43
   6  -4   0   38.36   12.08
   6  -4   0   41.98    7.67
   6  -4   0   57.47    8.51
  -6   2   0   37.36    6.55
  -2  -4   0   30.88    7.19
   2  -6   0   42.30    5.79
  -4  -2   0   41.16    7.20
  -4  -2   0   36.78    7.47
  -4  -2   0   51.10   10.33
  -6   2   0   41.94    9.96
   2   4   0   43.61    8.87
   6  -2   0   37.75    6.89
   2   4   0   40.65    6.17
  -4  -2   0   39.10    7.97
  -6   4   0   41.32    8.23
  -6   2   0   41.01   10.33
  -6   2   0   42.63    6.97
  -6   2   0   30.99    6.78
   2   4   0   36.56    7.96
  -4  -2   0   25.19    8.55
   1  -6   0   77.77    8.18
  -6   1   0   81.44    9.08
   6  -5   0   67.24    8.51
   5   1   0   77.11    9.45
  -6   1   0   73.80   12.87
  -1   6   0   91.17    6.09
   5  -6   0   88.98   14.69
   5   1   0  100.40   10.14
  -6   1   0   71.84    8.46
  -6   1   0   99.54   12.98
  -6   1   0   86.19   12.83
   1  -6   0   70.76    7.15
   1  -6   0   96.78   13.37
   5   1   0   83.05   12.36
  -6   5   0   87.86    7.71
  -1  -5   0   80.13   12.11
  -1  -5   0   63.54    8.32
   5  -6   0   81.73    7.35
   1  -6   0   80.34    7.65
   1  -6   0   71.49    8.15
   6  -5   0   83.08    8.36
   1  -6   0   54.38    8.92
  -5  -1   0   85.03    9.55
  -5  -1   0   86.45   12.20
  -5  -1   0   79.20   11.36
  -6   5   0   95.75   10.22
  -6   5   0   91.19    8.91
   1  -6   0   81.23    7.60
   5   1   0   88.19    8.23
   1   5   0   70.97   10.47
   5   1   0   72.06    8.35
  -5  -1   0   57.91   11.91
  -5  -1   0   70.46    8.56
  -5  -1   0   93.89    9.49
  -6   1   0   74.54    8.84
  -1  -5   0   77.67    9.06
  -1   6   0   66.68    7.35
  -1  -5   0   69.91    7.86
  -1   6   0   72.93   11.77
   6  -5   0   62.36   12.07
   6  -5   0  114.07   16.59
   6  -5   0   73.51    9.24
   6  -5   0   80.70    8.43
   1   5   0   93.01   10.16
   5  -6   0   95.45   11.28
   5  -6   0   84.47   15.38
   5  -6   0   83.13    7.64
   6  -1   0   78.50   11.17
   6  -1   0   97.31    9.91
   6  -1   0   70.04    8.25
   6  -1   0   83.92   12.25
   6  -1   0   89.26   10.14
  -1   6   0   84.14    6.54
   6  -1   0   89.84   12.91
   1   5   0   86.84    7.83
  -5   6   0   86.01   11.22
   1   5   0   84.11    8.38
  -1  -5   0   68.94    8.52
   5   1   0   85.99   13.76
  -6   0   0  177.46   18.09
   0  -6   0  181.95   20.93
   0  -6   0  198.84   12.93
   0  -6   0  204.91   15.34
   6   0   0  197.25   14.37
  -6   6   0  194.45   10.79
   0  -6   0  170.62   13.12
   6  -6   0  197.54   21.96
   6  -6   0  208.65   13.01
   6  -6   0  201.43   12.61
   6  -6   0  194.34   15.01
  -6   0   0  205.79   14.18
  -6   0   0  224.88   20.56
  -6   0   0  205.91   20.30
   0   6   0  190.73   12.65
   6   0   0  194.85   14.73
   6   0   0  200.84   15.07
   6   0   0  188.84   14.20
   6   0   0  188.06   17.66
   0  -6   0  185.30   13.74
  -6   0   0  199.10   14.06
   0   6   0  200.03   13.26
   0   6   0  189.60   16.47
  -6   6   0  193.96   16.10
  -6   0   0  214.64   14.55
   6   0   0  212.93   19.16
   0   6   0  182.94   10.10
   6  -6   0  210.85   20.41
   7  -3   0   24.66    7.92
   7  -3   0   23.31    7.06
   7  -3   0   27.27   10.80
  -7   3   0   30.88    7.06
  -7   3   0   49.78    8.05
  -7   4   0   42.40   12.79
   7  -4   0   55.63    8.66
   3   4   0   44.07    7.31
   4  -7   0   34.99    9.94
   7  -4   0   33.48   12.24
  -7   4   0   21.18    8.70
   4   3   0   37.22    4.60
  -7   3   0   28.68   11.62
   7  -3   0   32.27   10.35
   7  -3   0   45.18    7.53
  -7   4   0   24.62    6.60
   3   4   0   46.11    8.71
   3   4   0   28.70    7.21
   4   3   0   51.35    8.35
   4   3   0   54.12   11.71
   4   3   0   27.33   11.67
   4   3   0   35.92    7.38
   7  -4   0   30.89   12.74
   4  -7   0   31.45    6.07
  -4  -3   0   30.62    9.69
  -4  -3   0   19.96    7.29
   3   4   0   41.50    9.93
   3  -7   0   39.52    6.83
   3  -7   0   40.29    9.45
   3  -7   0   47.49   12.63
   3  -7   0   37.29    5.16
   4  -7   0   48.80    9.95
   4  -7   0   41.68   14.20
   4  -7   0   32.51    5.47
  -3  -4   0   47.76    9.10
  -4  -3   0   29.95    8.05
   7  -4   0   43.14   10.51
  -7   3   0   51.18   12.49
  -7   3   0   32.30    9.91
  -3  -4   0   36.23    7.83
   3   4   0   49.06   17.55
   4   3   0   25.75    7.68
  -4  -3   0   31.77   10.27
  -3  -4   0   57.47   12.26
  -7   4   0   55.91   12.97
  -4  -3   0   48.56    8.89
  -7   4   0   46.25    8.11
   3  -7   0   29.27    8.18
   7  -3   0   48.45   12.63
   7  -4   0   40.48    8.14
  -3  -4   0   36.00    8.51
   7  -4   0   28.75    7.26
  -3  -4   0   25.97    8.77
  -7   2   0  570.91   30.47
   5   2   0  589.35   32.08
  -5  -2   0  552.92   24.77
   7  -5   0  551.92   32.36
   2  -7   0  539.95   22.73
  -7   5   0  547.12   25.27
  -5  -2   0  534.49   27.96
   2   5   0  586.13   27.73
  -2  -5   0  529.64   24.68
  -5  -2   0  590.00   30.93
   5   2   0  600.29   25.16
   5   2   0  572.09   25.85
   2  -7   0  572.90   24.38
  -7   2   0  570.06   24.60
  -7   2   0  566.61   29.75
   7  -5   0  615.08   25.10
  -7   5   0  566.38   25.18
   2   5   0  538.92   25.18
  -7   2   0  582.06   24.62
  -5  -2   0  576.32   25.70
  -2   7   0  584.62   23.19
   5   2   0  599.54   32.06
   2   5   0  565.39   27.40
   2  -7   0  554.35   23.51
   2  -7   0  591.80   24.02
   2  -7   0  579.77   22.50
   5   2   0  592.03   22.69
  -5  -2   0  558.08   31.54
   7  -2   0  588.10   29.83
   5   2   0  549.46   24.89
   7  -2   0  589.27   30.23
   7  -2   0  599.23   26.12
   5  -7   0  562.37   33.53
   5  -7   0  572.59   22.34
   5  -7   0  584.74   26.74
  -7   2   0  536.56   24.55
   7  -2   0  560.71   24.63
   5  -7   0  607.87   29.89
   7  -2   0  545.22   29.57
  -7   5   0  541.92   23.24
  -2  -5   0  532.60   25.21
   7  -5   0  582.36   25.17
   7  -5   0  621.70   26.48
   7  -5   0  575.62   24.80
  -2  -5   0  577.85   25.67
  -2  -5   0  564.00   26.86
   2   5   0  631.32   25.46
   5  -7   0  538.80   22.42
   7  -2   0  597.19   25.92
   2  -7   0  597.90   31.09
   5  -7   0  615.60   22.19
   2  -7   0  558.88   33.31
   2   5   0  608.68   27.48
  -5   7   0  576.85   27.00
  -7   2   0  592.86   32.91
  -2  -5   0  636.49   31.90
  -1  -6   0   27.22   11.38
   7  -1   0   10.99   10.43
   7  -1   0   15.17   11.63
   1  -7   0    7.09    8.17
   1  -7   0   18.17    6.67
   6  -7   0   21.17    5.89
  -1   7   0   23.08    6.30
  -6  -1   0   22.19    7.68
   7  -1   0   21.70    6.34
  -7   1   0   28.22   11.02
   7  -6   0    3.60   11.07
   7  -6   0   13.54    6.40
   6   1   0   11.34   11.24
   6   1   0   43.84   13.59
  -7   6   0   26.04    6.56
  -6  -1   0   10.92    6.92
  -1   7   0   20.34    4.77
   1  -7   0   19.30    4.62
  -1  -6   0   18.50    6.60
   1   6   0   13.37    6.78
   7  -6   0   26.14    6.87
   7  -6   0   11.20    7.45
  -6  -1   0   11.85    7.51
   1  -7   0   27.52    6.70
   6   1   0   17.11    6.38
   6   1   0   18.87    7.57
   7  -6   0   22.04   13.07
   6  -7   0   15.20   13.13
   7  -1   0   24.38    7.39
   6  -7   0   15.47    5.52
   1  -7   0   27.86   11.58
  -7   1   0   26.28    7.19
  -6  -1   0   12.60   11.88
  -7   1   0   16.40    7.09
  -1   7   0   24.50    9.95
   1  -7   0   16.79    6.92
  -1  -6   0   15.75    6.96
  -7   6   0   13.17    8.42
  -6  -1   0   18.08    9.67
  -1  -6   0    9.99    7.37
   6   1   0   17.28   11.73
   1  -7   0   13.97    4.76
  -6   7   0   16.90    9.31
  -1  -6   0   21.46    7.53
   7  -1   0   28.40    9.40
  -7   6   0    7.25    5.73
   6   1   0   26.45    7.87
  -7   1   0   16.88   10.71
   7  -1   0   27.70    8.74
  -7   1   0   18.36    7.48
   1   6   0   32.41    8.00
   1   6   0   20.05    5.15
   6  -7   0   15.92   10.36
   1   6   0   26.58    9.56
   7  -6   0   29.14    7.58
   0   7   0   61.25   12.51
   0  -7   0   54.37   10.57
   7  -7   0   75.51   14.07
   7   0   0   56.76   13.90
  -7   7   0   70.78   11.44
   0  -7   0   80.59   14.18
   0  -7   0   65.70    9.63
   0  -7   0   75.30    8.88
   7  -7   0   98.08   10.20
   7   0   0   55.92    9.21
  -7   0   0   67.40   13.13
   0   7   0   74.47    8.85
   7   0   0   57.39   10.03
   7   0   0   54.89   13.43
  -7   0   0   97.76   14.71
   0  -7   0   64.80    9.25
   7   0   0   61.59    9.61
   0   7   0   74.43    8.05
   0   7   0   59.41    6.07
   7  -7   0   90.02   17.64
  -7   0   0   75.19   10.32
   7  -7   0   64.74   10.57
   7   0   0   82.57   11.06
  -7   0   0   52.29    8.90
  -7   0   0   83.07   10.82
   7  -7   0   74.82    8.36
   4  -8   0  172.35   12.66
  -4  -4   0  176.32   15.26
   4  -8   0  199.97   17.54
  -8   4   0  180.75   13.91
   8  -4   0  210.26   18.15
   8  -4   0  148.30   17.89
   4  -8   0  189.13   10.95
   4   4   0  191.62   15.57
  -4  -4   0  193.67   15.74
   4   4   0  182.78    8.62
   4  -8   0  176.94   21.05
  -4  -4   0  159.61   17.89
   8  -4   0  182.13   15.00
   8  -4   0  166.44   20.39
  -8   4   0  184.43   16.26
  -8   4   0  197.65   21.62
   4   4   0  165.18   17.07
  -4  -4   0  211.62   19.95
  -4  -4   0  229.75   15.94
   8  -4   0  195.66   21.09
   4  -8   0  193.82   16.57
   4   4   0  195.00   15.05
   8  -4   0  171.83   14.36
   4   4   0  188.32   17.95
  -8   4   0  179.28   14.01
   4   4   0  181.60   13.69
  -5  -3   0   32.12   10.61
  -3  -5   0   34.94   12.75
  -8   3   0   28.50   12.06
   3  -8   0    8.72    8.36
   3  -8   0   34.40    7.43
   8  -3   0   15.02   11.08
   3   5   0   34.09    8.75
   8  -3   0   44.56   12.89
   3  -8   0   29.61   14.01
   3   5   0   26.85    9.99
  -8   3   0   40.82   11.10
   5   3   0   40.02    9.83
  -8   5   0   31.96    7.22
   8  -3   0   32.16    8.01
   8  -5   0   37.28    9.55
   5  -8   0   39.10    5.88
   3   5   0   33.60    8.85
   5  -8   0   22.44    5.90
  -8   5   0   13.14    7.55
  -8   3   0   26.53    7.74
   8  -5   0   32.39   13.36
   8  -5   0   31.33    8.63
   8  -3   0   23.26   10.18
  -5  -3   0   28.25    8.29
   3  -8   0   32.21    8.45
   5  -8   0   25.38    5.83
   8  -5   0   23.25    7.23
   5  -8   0   20.85    8.84
  -5  -3   0   29.02    8.66
   8  -5   0   28.38    7.93
   5   3   0   40.46   13.46
   5   3   0   37.29    8.68
   5   3   0   58.60   13.59
  -3  -5   0   37.41    9.37
  -8   5   0   28.68    8.71
  -3  -5   0   23.91    8.50
  -3  -5   0   21.12    8.17
   3  -8   0   38.72    6.47
   3   5   0   26.69    8.30
   3  -8   0   23.05    5.90
  -5  -3   0   21.79    8.03
   3   5   0   38.00    7.75
   5  -8   0   19.80   10.22
   5  -8   0   23.39   12.95
   5   3   0   10.26    7.28
   8  -5   0   27.84   14.13
   8  -3   0   27.37    8.76
  -5  -3   0    9.06    9.74
   5   3   0   24.65    5.13
  -3  -5   0   29.43    9.59
   8  -3   0   26.57    8.23
  -6  -2   0   39.58   11.20
  -8   6   0   27.72    9.28
  -8   2   0   36.94   12.50
  -8   2   0   31.30    8.13
  -8   2   0   27.42    7.35
  -6  -2   0   38.35   14.31
  -8   2   0   35.27    8.63
   2  -8   0   37.57    7.22
   6  -8   0   35.94    6.31
   6  -8   0   23.31    9.23
   6  -8   0   38.99   11.31
  -8   6   0   35.13    7.11
   2   6   0   43.39    6.54
  -6  -2   0   41.51    8.73
   2  -8   0   44.95    7.60
   2  -8   0   31.31    6.55
   2  -8   0   30.63    7.88
   8  -2   0   36.18   11.64
   6   2   0   41.89    9.74
   2   6   0   28.72    8.49
   6   2   0   41.56    9.36
   8  -2   0   31.65    7.84
  -8   6   0   52.02    8.46
   8  -2   0   57.48   13.57
   2  -8   0   30.64   10.52
  -8   2   0   12.50   10.88
   6  -8   0   19.28   12.93
   6  -8   0   39.11    6.55
   2  -8   0   27.41    6.25
   2  -8   0   39.68    9.95
  -2  -6   0   47.07   10.27
   6   2   0   51.17    9.31
   8  -6   0   45.71   14.62
   8  -2   0   28.37    8.54
  -6  -2   0   38.85    8.87
   2  -8   0   37.26   12.90
   2   6   0   40.91    9.67
  -6  -2   0   40.61    9.04
  -2  -6   0   39.33    9.76
  -2  -6   0   30.92    9.95
  -2  -6   0   54.83   15.41
   8  -2   0   65.67   10.88
   6   2   0   51.60   15.78
   6   2   0   74.02   15.16
   8  -6   0   31.22    7.86
   8  -2   0   56.36   13.30
   6   2   0   39.66    6.72
  -6   8   0   19.46    9.76
  -2  -6   0   30.92    7.85
   8  -6   0   32.52   14.27
   2   6   0   31.22    9.98
   6  -8   0   53.52    6.70
  -2   8   0   42.90    8.34
   6  -8   0   23.21   13.99
   8  -6   0   51.46   10.32
   8  -6   0   34.99    9.39
  -8   1   0 2357.69   84.52
   8  -7   0 2303.62   77.90
   8  -1   0 2418.50   80.41
  -1  -7   0 2190.47   83.75
   8  -7   0 2333.56   77.61
   7   1   0 2440.28   80.40
   7   1   0 2297.69   78.80
   7   1   0 2341.25   79.79
  -8   7   0 2318.48   76.70
  -1   8   0 2391.52   77.13
   8  -1   0 2232.15   78.27
   7  -8   0 2408.02   84.53
   7  -8   0 2205.49   88.79
  -8   1   0 2181.55   84.56
   7  -8   0 2331.86   76.12
   8  -1   0 2309.02   81.37
   7   1   0 2306.21   98.63
   7   1   0 2311.09   80.48
   1  -8   0 2226.24   77.53
  -1  -7   0 2252.43   79.82
   1   7   0 2301.67   75.24
  -1  -7   0 2180.75   79.05
  -1  -7   0 2382.27   78.69
   1   7   0 2396.15   88.18
  -8   7   0 2368.36   75.45
  -7  -1   0 2275.94   79.58
   1  -8   0 2277.71   73.19
  -1  -7   0 2259.85   78.84
   1  -8   0 2349.62   77.28
   8  -7   0 2438.49   86.18
   8  -7   0 2398.73   78.32
  -1   8   0 2242.01   84.51
  -8   1   0 2294.61   79.23
  -8   1   0 2335.17   78.51
  -7  -1   0 2185.38   85.39
   1   7   0 2354.32   78.13
   8  -7   0 2210.06   79.53
   1  -8   0 2353.94   73.62
  -8   1   0 2328.64   79.46
  -7   8   0 2367.31   80.69
   8  -1   0 2277.05   80.03
  -7  -1   0 2260.18   78.32
   7   1   0 2211.46   85.74
  -7  -1   0 2268.75   82.77
   1  -8   0 2295.66   80.66
   7  -8   0 2343.42   76.13
  -8   7   0 2315.28   80.20
   7  -8   0 2279.96   80.24
  -7  -1   0 2250.88   79.55
   1   7   0 2250.70   77.13
   1  -8   0 2307.10   85.11
   8  -1   0 2362.64   85.28
   8  -7   0 2142.85   88.59
   1  -8   0 2338.55   78.30
   8  -1   0 2219.15   83.53
   8   0   0   39.91   10.17
   8   0   0   37.92   13.42
   0  -8   0   23.80    8.57
   8  -8   0   24.93    6.62
   8  -8   0   15.09    6.92
  -8   0   0   33.62    9.12
   8   0   0   24.17    8.46
   0  -8   0   14.98    7.06
   0   8   0   26.13    5.02
   8  -8   0   28.89   11.93
   8  -8   0   26.29    9.54
   8  -8   0   20.42    6.69
  -8   0   0    7.18   11.02
  -8   0   0   13.04    7.98
   8   0   0   17.17    8.30
   8   0   0   26.19    9.05
   0   8   0   32.54   11.90
  -8   8   0   28.31   10.45
   8  -8   0   25.48   15.43
  -8   0   0   28.94   11.13
   0   8   0   27.36    6.50
   0  -8   0   21.21    7.72
   0  -8   0   35.14   13.54
   8   0   0   13.83   11.62
   0   8   0    4.89    6.87
   0  -8   0    9.05    9.20
  -8   0   0   15.10    8.85
   5  -9   0   36.67   10.40
   5  -9   0   47.34    6.32
   5  -9   0   62.34   17.23
  -9   4   0   47.85    9.38
   4   5   0   46.26    9.19
   9  -4   0   34.39    8.68
   9  -4   0   48.28   14.02
   9  -4   0   45.86   10.01
   5  -9   0   51.15    7.52
  -4  -5   0   41.49   12.60
   5   4   0   45.36   12.84
  -9   5   0   38.67   15.54
   5   4   0   49.89    9.03
   5   4   0   97.35   15.71
   9  -5   0   57.51   10.20
  -5  -4   0   32.31   10.89
  -5  -4   0   55.76   10.31
   9  -4   0   40.64   14.36
   9  -5   0   24.73   14.31
  -9   4   0   33.93    8.35
   9  -5   0   50.48    9.84
   5  -9   0   35.06   10.70
   4   5   0   51.74   10.28
   4  -9   0   56.72   16.95
   4  -9   0   58.53   11.84
  -4  -5   0   52.19   10.29
   5   4   0   43.11    9.28
  -9   5   0   44.35    8.40
  -9   4   0   48.21   15.95
   9  -5   0   53.07   12.34
   4  -9   0   30.44    7.49
   9  -4   0   49.23   10.89
  -4  -5   0   56.71   10.76
   4   5   0   40.29   11.71
  -9   5   0   37.73    9.06
  -4  -5   0   39.91    8.70
   5  -9   0   44.52    7.18
  -9   4   0   34.96   11.26
   9  -5   0   60.33   10.64
  -9   5   0   19.89    9.60
  -5  -4   0   84.94   11.50
  -5  -4   0   36.99   10.20
  -5  -4   0   68.06   13.17
   4  -9   0   59.53    7.33
   4   5   0   51.58    9.13
   4  -9   0   81.72   12.56
   9  -4   0   50.53   10.26
  -4  -5   0   41.23   10.90
   5   4   0   64.40   10.61
   9  -5   0   53.80   15.30
   5   4   0   51.32    5.14
  -6  -3   0  195.96   19.13
  -9   3   0  207.72   16.37
   9  -6   0  221.16   17.54
   9  -6   0  203.43   20.90
   3  -9   0  183.83   15.76
  -6  -3   0  170.97   19.90
  -3  -6   0  237.57   17.71
   6  -9   0  205.71   17.12
   9  -3   0  198.31   17.45
   6  -9   0  176.27   17.31
   6   3   0  232.23   26.37
   6   3   0  170.49   18.98
   6   3   0  168.71   15.50
  -9   6   0  196.23   16.16
  -6  -3   0  197.27   16.50
   3  -9   0  194.79   17.43
  -3  -6   0  142.80   15.53
  -6  -3   0  149.42   14.49
  -3  -6   0  233.36   18.05
   3   6   0  218.83   14.15
   6  -9   0  208.75   12.70
   6  -9   0  196.79   12.40
  -9   3   0  218.20   19.47
  -9   6   0  195.04   14.62
  -9   3   0  186.32   16.10
   3  -9   0  178.76   21.60
  -6  -3   0  219.69   17.62
   9  -6   0  156.75   14.20
   9  -3   0  219.87   21.65
  -9   3   0  202.73   22.41
   3  -9   0  212.37   15.30
   6  -9   0  170.27   21.77
   3  -9   0  206.70   18.76
   6  -9   0  174.02   23.07
   9  -3   0  209.75   18.36
   9  -3   0  211.65   16.25
   9  -3   0  177.97   20.78
  -3  -6   0  217.59   22.56
  -9   6   0  207.29   15.97
   3  -9   0  181.45   12.77
   6   3   0  200.95   12.24
   6   3   0  241.22   18.49
   3   6   0  195.47   16.23
   9  -3   0  162.21   19.23
   3  -9   0  189.44   14.99
   9  -6   0  219.16   17.68
   9  -6   0  215.98   15.93
   6  -9   0  211.91   11.97
   9  -6   0  195.63   24.28
   6   3   0  199.05   16.57
  -3  -6   0  224.46   17.68
   3  -9   0  186.67   12.84
  -2  -7   0   79.30   10.40
  -9   7   0   96.90   12.53
   9  -2   0   82.90   14.13
   9  -7   0  102.80   17.80
   9  -7   0   91.16   10.89
   9  -2   0  101.57   16.13
   9  -2   0   79.72   11.51
   9  -7   0   77.65   12.08
  -9   2   0  107.45   12.83
   7  -9   0   87.58   17.66
  -2  -7   0   86.54   12.13
   2   7   0  106.32   11.66
  -9   2   0   83.91   11.29
   2   7   0   85.92   10.75
   9  -2   0   91.14   12.51
   7   2   0   95.27    9.39
   2  -9   0   90.62   10.69
   2  -9   0   78.06    8.43
  -2  -7   0   99.03   18.54
   2  -9   0   80.55    9.74
  -9   7   0   72.72    9.24
   2   7   0  106.25    9.71
   9  -7   0   76.48   11.01
  -7  -2   0   93.25   12.05
  -2  -7   0  117.10   13.01
  -7  -2   0   87.97   14.40
   7  -9   0   94.21    9.11
   9  -2   0   92.49   11.75
   7  -9   0  118.94   15.36
  -9   2   0   97.15   11.41
   2  -9   0  116.07   14.37
   2  -9   0  115.68   17.92
  -9   7   0  107.65   10.54
   7   2   0   83.02   10.84
   9  -2   0   98.89   15.87
   7   2   0   78.07   11.66
   7  -9   0   87.07   12.82
   7  -9   0   92.22   19.09
  -9   2   0   90.01   16.32
   7  -9   0   96.88    8.53
  -7  -2   0   82.64   11.12
   7   2   0   74.90   16.40
   2  -9   0   86.42    9.74
  -7  -2   0  115.26   13.36
   7   2   0   80.31   18.46
   7  -9   0   86.04    8.62
  -7  -2   0   92.04   18.06
  -2   9   0   96.87    9.82
   9  -7   0   80.60   10.58
   2  -9   0   86.87    8.05
  -2  -7   0   70.13   10.98
   2  -9   0  116.49   13.84
   9  -7   0  115.09   20.92
  -9   2   0   93.70   14.77
   2   7   0   81.26   13.67
   7   2   0   74.10   10.96
  -9   8   0   -5.91    9.29
  -8  -1   0   11.12    8.44
  -9   1   0   14.57    7.92
   1   8   0   12.40    6.89
   9  -8   0    3.40   12.04
   9  -8   0   12.75    7.41
   8  -9   0    6.25    8.78
  -1  -8   0   22.76    9.32
   8  -9   0   22.03   14.82
   8   1   0   38.87   14.54
   8  -9   0   10.78   10.90
   8   1   0    6.89    7.02
  -9   1   0   17.71   11.09
  -8  -1   0   21.95    8.87
  -1  -8   0   22.73    9.09
   1  -9   0   18.14    7.83
  -9   1   0   13.44    8.32
  -9   1   0   17.20   11.67
   8   1   0   23.06   14.22
  -1  -8   0   17.61    8.15
   9  -8   0   27.79    7.40
   1   8   0   19.30    5.39
  -8   9   0   14.71   10.24
   9  -1   0   20.42   12.04
   8   1   0   24.78    9.63
   1  -9   0    0.09   10.02
   8  -9   0    7.73    6.09
  -9   1   0   -1.23    7.63
   8   1   0   13.61    7.92
   1   8   0    9.33    7.68
  -8  -1   0   10.04   10.59
   1  -9   0    7.90   12.19
  -1   9   0   16.03    7.40
   1  -9   0   24.19    8.76
   9  -1   0   14.16    9.20
   9  -1   0   -0.22    8.78
  -1  -8   0   33.14   14.82
   9  -1   0    8.14    8.67
   9  -8   0   -2.89   14.55
   1  -9   0    5.73    6.48
   1   8   0   12.52   10.59
   8   1   0   26.82    9.27
  -8  -1   0   42.21   22.08
   9  -1   0   -7.31   10.65
   9  -8   0   10.47    7.09
   9  -8   0   10.66    8.81
   9  -1   0    9.77    8.33
  -8  -1   0   20.44    8.92
  -1  -8   0    2.70    8.46
   8  -9   0   14.43    5.41
   8  -9   0   15.90    6.29
  -9   8   0   17.74    5.37
   9  -9   0  782.42   31.58
   0  -9   0  802.69   41.64
   0  -9   0  796.04   36.95
  -9   9   0  766.23   35.86
   9   0   0  793.72   34.95
   9   0   0  840.78   36.90
   9   0   0  783.97   34.73
   0   9   0  829.78   33.23
  -9   0   0  825.51   34.77
   9  -9   0  729.23   35.26
   0  -9   0  800.69   35.01
   0  -9   0  806.76   33.68
  -9   0   0  804.58   40.15
   0   9   0  770.05   39.81
   9  -9   0  806.94   40.55
   0  -9   0  771.25   34.11
   0   9   0  792.63   27.77
  -9   0   0  744.36   34.79
   9  -9   0  730.27   45.35
   9   0   0  866.47   43.80
   9   0   0  760.62   35.48
   0   9   0  736.65   28.47
   9  -9   0  767.79   31.98
   9   0   0  790.93   39.96
  -9   0   0  793.35   42.65
   9  -9   0  805.44   32.12
  -9   0   0  787.59   35.35
   5   5   0 4220.63  137.54
   5 -10   0 4274.22  138.16
   5 -10   0 4177.42  132.37
  -5  -5   0 4200.65  137.17
   5 -10   0 4018.65  133.06
   5   5   0 4246.35  137.42
 -10   5   0 3995.05  138.18
  10  -5   0 3859.07  137.75
   5 -10   0 3999.27  138.89
  10  -5   0 4072.58  136.25
  10  -5   0 4127.61  145.08
   5 -10   0 4231.96  148.77
  -5  -5   0 4098.62  141.86
  -5  -5   0 4219.23  138.40
   5   5   0 4211.90  136.14
  10  -5   0 4152.24  139.88
  10  -5   0 4102.12  146.09
 -10   5   0 4198.37  147.21
  -5  -5   0 4266.98  140.96
  -5  -5   0 4009.71  137.57
 -10   5   0 4126.36  135.72
   5 -10   0 4324.38  133.53
   5   5   0 4075.61  140.29
 -10   5   0 4301.98  136.81
  10  -5   0 4165.17  138.08
   5   5   0 4246.07  141.31
   4 -10   0   27.60    8.27
  10  -6   0   20.06   13.68
   6 -10   0   25.60    6.25
  -4  -6   0   26.98    9.95
  -4  -6   0   33.11   10.42
   6 -10   0   23.40   14.44
  -6  -4   0   13.88   12.10
   4   6   0   13.95    8.71
  10  -4   0   30.84   13.70
   6 -10   0   18.12   10.11
   6   4   0   29.95    8.72
   6 -10   0   31.58    5.91
 -10   6   0   40.71    8.17
 -10   4   0   28.75    8.73
 -10   6   0   25.44    9.10
 -10   6   0   36.00    9.51
   6 -10   0   27.30   13.94
  -6  -4   0   33.01    9.96
  -6  -4   0   15.77   10.86
   6   4   0    0.07    7.82
  10  -4   0   41.45   11.06
 -10   4   0   22.67    8.43
   4 -10   0   26.78    7.72
  10  -6   0   17.39    9.12
   4   6   0   31.48    9.64
 -10   4   0   23.84   10.80
   4 -10   0    8.09   13.67
   6 -10   0   13.09    9.87
   6   4   0   26.80    9.60
   6   4   0   11.10   11.84
   6   4   0   12.78   11.39
 -10   4   0   31.28   15.00
  10  -4   0   17.34    8.96
  10  -4   0   38.52   14.21
  10  -4   0   41.58   11.14
   4 -10   0   26.26   10.36
   4   6   0   36.25   12.13
   4   6   0   20.97    7.84
  10  -4   0   26.04    9.59
   6 -10   0   19.18    6.07
  -4  -6   0   28.47   12.35
  10  -6   0   37.69   10.35
   4 -10   0   29.58    8.76
  10  -6   0   21.13    8.33
  -4  -6   0   11.81    8.45
   4   6   0   24.27   10.93
   6   4   0   18.88    4.90
  10  -6   0   29.04   15.31
   4 -10   0   18.11    6.26
  -4  -6   0   27.85    8.37
  -6  -4   0   20.76    9.36
  -6  -4   0   19.96    9.74
  10  -6   0    1.53    8.81
   3   7   0   -6.82    9.06
  10  -7   0   -6.56    7.61
   3 -10   0   10.32    6.32
  -3  -7   0    8.24   12.64
   7 -10   0   12.31   13.13
  -3  -7   0    2.03    8.71
   7 -10   0    7.84    9.08
  -7  -3   0   -0.26    8.34
  -7  -3   0    0.86   12.83
  -7  -3   0    8.61    8.80
  10  -7   0   -9.70   12.11
  10  -3   0   -8.53    9.22
  10  -3   0    0.78    7.39
  10  -3   0   -2.53   11.06
   3   7   0   -7.97    7.79
   7 -10   0  -10.29    4.78
 -10   7   0    7.25    9.28
 -10   7   0   -2.54    6.76
  -7  -3   0   -3.65    7.86
   3 -10   0    8.26    7.04
 -10   3   0   -2.63    7.64
   7 -10   0    0.21    4.95
   3 -10   0   -1.37    6.13
   7   3   0    4.10    5.26
   7   3   0    8.41    8.65
  10  -3   0    0.12    8.08
 -10   7   0   -4.26    6.14
  10  -7   0   -5.00    8.18
 -10   3   0   10.74   10.75
   3 -10   0   -5.26    9.09
   3 -10   0  -18.06   12.20
   7 -10   0    4.64    4.91
   7   3   0    6.70    7.66
   3   7   0  -15.15    7.32
  -7  -3   0    2.11    9.44
   3 -10   0   -6.91    6.39
   7   3   0  -14.91   12.99
   7   3   0   -5.38   11.26
   3   7   0    0.82    5.72
   3 -10   0   16.36   10.43
 -10   3   0    1.85   12.38
  10  -7   0    2.56   14.80
   7 -10   0    3.31    9.56
   7 -10   0  -12.25   11.61
  10  -7   0    4.75    8.77
  10  -7   0    3.03    7.72
  -3  -7   0   11.03    9.48
   3 -10   0   -2.60    5.78
  -3  -7   0    4.94    8.95
 -10   3   0   19.96    8.42
  -3  -7   0   -9.75    8.35
   7   3   0   11.61    8.79
  10  -3   0    8.41   11.64
  10  -3   0   21.12   12.15
  10  -8   0  204.81   27.22
   2 -10   0  195.07   17.00
  10  -2   0  261.62   23.26
  10  -2   0  230.63   20.40
  10  -8   0  231.29   16.85
   8 -10   0  219.82   13.54
  -2  -8   0  209.37   18.17
  10  -2   0  216.45   19.00
   8 -10   0  210.92   13.19
  10  -2   0  150.92   17.91
  10  -8   0  248.83   17.90
   2   8   0  202.39   13.16
   8 -10   0  209.65   20.42
  -2  -8   0  191.61   18.15
 -10   2   0  217.83   18.31
 -10   2   0  172.22   18.64
 -10   8   0  202.81   18.10
   2 -10   0  190.49   12.17
   2 -10   0  232.83   11.71
   8 -10   0  221.85   18.69
  -2  -8   0  169.34   16.75
  -2  -8   0  176.23   17.31
   2 -10   0  202.58   15.34
   2 -10   0  224.31   15.66
   2   8   0  197.45   20.78
   8 -10   0  196.60   25.71
  10  -8   0  200.76   16.69
   8 -10   0  190.93   12.42
   2 -10   0  206.68   24.59
   8   2   0  202.44   23.89
   8   2   0  220.05   18.04
  -8  -2   0  219.80   21.61
 -10   2   0  236.52   23.89
  10  -2   0  208.93   19.57
  -8  -2   0  189.35   17.24
   8   2   0  226.18   15.44
 -10   2   0  234.48   18.17
   2 -10   0  182.78   17.92
   8   2   0  177.77   25.49
  -2  10   0  209.07   15.28
  10  -8   0  202.40   17.81
   2 -10   0  188.88   18.46
  10  -8   0  169.05   21.04
 -10   8   0  228.18   13.96
   8   2   0  219.55   18.67
   8 -10   0  168.86   23.25
  -8  -2   0  179.27   16.60
  -8  -2   0  171.92   28.15
  -8  -2   0  158.13   16.10
   2   8   0  226.07   17.58
  10  -2   0  205.25   17.63
   8   2   0  186.42   17.37
  -2  -8   0  165.80   22.67
   2   8   0  188.75   16.05
   1 -10   0   -5.74    6.79
   9   1   0   -6.34   15.40
  -1  10   0    3.69    7.00
  -9  -1   0    7.93   14.61
   1   9   0   -5.26    4.79
  10  -9   0    5.70   15.32
 -10   1   0   -1.48   12.03
 -10   1   0    8.22    8.40
   1 -10   0   -1.16    9.41
  10  -9   0    0.99    7.19
   1 -10   0    4.52    6.86
  10  -9   0    1.47    9.06
  10  -9   0   -8.68    6.35
  -1  -9   0   16.69    9.36
   9 -10   0    8.97    7.24
  -9  -1   0   12.85   11.97
  10  -1   0   18.00   13.61
  10  -9   0   -0.33    6.90
   9   1   0    5.33    7.42
   9 -10   0  -10.82    8.13
   9 -10   0   23.83   15.69
   9   1   0    6.19    9.26
  -9  10   0    2.44    9.69
   1 -10   0    1.49    8.39
   9 -10   0   -3.92   10.41
 -10   1   0    2.50   10.98
  10  -1   0    3.05    9.26
  -1  -9   0    0.36   10.55
   1 -10   0   -6.75   12.91
  -9  -1   0  -11.69    7.72
  -9  -1   0   -1.72    8.35
  -1  -9   0    2.35   16.10
   9 -10   0   12.49   14.07
   1   9   0    1.33    5.91
  10  -1   0   24.05   12.86
   9   1   0    4.53   13.77
   9 -10   0    2.89    5.73
   9 -10   0    3.89    6.15
  10  -1   0   -7.77    9.01
   9 -10   0   11.18    5.65
 -10   1   0   11.14    8.65
   9   1   0   -3.55   10.01
  -1  -9   0  -10.92    6.99
 -10   9   0    3.18    9.87
   1 -10   0   -9.12   10.11
 -10   1   0    4.87   12.46
  10  -1   0    3.01   10.82
   1   9   0    4.78   10.79
  -1  -9   0   15.64    9.66
  -9  -1   0   13.82    9.76
   9   1   0    7.06    7.90
   1   9   0    4.37    7.72
  10  -1   0   12.68   13.64
  10  -9   0   14.46   12.59
  10 -10   0   50.09   18.98
  10 -10   0   12.74    6.83
 -10   0   0   29.27   13.95
  10   0   0   48.25   17.27
  10   0   0   29.12   13.17
  10 -10   0   23.42    8.46
 -10   0   0   35.76   10.31
  10   0   0   69.38   16.80
   0 -10   0   36.81   10.35
   0  10   0   41.95   13.72
 -10   0   0   39.78   11.51
  10 -10   0   25.69    8.33
 -10  10   0   31.02   11.93
 -10   0   0    2.90   10.47
 -10   0   0   15.45   10.22
   0 -10   0   36.54   11.01
   0 -10   0    5.01   16.06
  10   0   0   16.12   10.64
   0 -10   0   30.34   12.38
  10 -10   0   22.19   11.99
  10 -10   0   24.68   13.90
  10   0   0   19.41   10.03
   0  10   0   34.01    9.07
  10   0   0   16.53    8.82
  -6  -5   0    0.90    9.15
   6 -11   0    6.49    9.03
   6 -11   0   11.77   14.57
  11  -5   0   11.57   10.39
 -11   5   0    7.93   14.21
   5   6   0    9.54   12.16
   5 -11   0    8.20    6.93
  11  -5   0    8.15   12.66
   5 -11   0  -10.85   13.24
   5 -11   0   13.70   12.19
  11  -6   0    6.63   13.92
  -5  -6   0    0.07   11.40
   6 -11   0    4.42    4.86
   5 -11   0   14.79    6.14
  -5  -6   0  -13.48    8.51
   5 -11   0    9.85    8.71
  11  -6   0   29.26   24.50
   6   5   0  -12.86   10.38
  -6  -5   0   -6.53   11.59
 -11   5   0   13.88   11.99
  -6  -5   0    8.80   10.54
   5   6   0   26.17   10.03
   5   6   0   19.60   10.47
   5   6   0   -4.99   10.04
   6   5   0   -3.25   10.25
  11  -6   0    5.35    9.66
  -5  -6   0    3.67    9.53
  11  -6   0   -3.01    8.13
 -11   5   0    0.20    7.98
   6 -11   0   10.02   13.04
   5 -11   0   18.02    8.22
   6 -11   0   15.41    6.63
  11  -5   0  -16.90   12.13
 -11   5   0    0.00    7.97
  11  -5   0   17.41    9.52
  11  -6   0   -6.11    9.02
   6   5   0   25.20   10.31
 -11   6   0    4.60    8.87
  -6  -5   0   -3.27    9.50
 -11   6   0    3.67    7.59
 -11   6   0    2.33    8.24
  11  -5   0    3.64   10.14
  -5  -6   0   26.28   12.20
   6   5   0   16.50    7.99
  -6  -5   0   -5.27    9.96
  11  -4   0   -3.01   12.47
   4   7   0   -8.23    9.29
   7 -11   0   13.11    6.64
   7 -11   0   -1.58   14.72
  11  -7   0   11.15   14.85
   4 -11   0    5.21   11.10
  -7  -4   0   17.53   11.29
   7 -11   0    1.24    4.67
   4 -11   0    8.53    7.50
   4 -11   0    4.48   10.19
  11  -4   0    3.48   12.16
   4 -11   0    8.07    6.99
 -11   4   0   21.00    9.12
 -11   4   0   11.92   14.89
   4   7   0    4.50    6.73
   4 -11   0   11.02   14.71
  11  -4   0   -1.96   11.91
  -4  -7   0   13.10   10.22
  11  -7   0   -7.19    9.15
   7   4   0    3.77    5.04
   4   7   0   14.05    9.66
  -7  -4   0    8.53    9.32
   7   4   0   -0.24    7.17
   4 -11   0   -1.16    7.20
  11  -7   0   17.40    9.97
   7 -11   0   12.83   14.87
  11  -4   0   -5.34    7.76
 -11   7   0    4.81    9.08
  -7  -4   0    9.99    9.88
 -11   7   0    6.07    8.47
   7 -11   0    3.09    5.51
   7   4   0    9.15   11.60
 -11   7   0   -0.61    7.13
   7 -11   0   -0.71    9.26
  -4  -7   0   20.48    9.41
  -7  -4   0   13.91    9.23
   4 -11   0   14.76    6.29
  11  -7   0    7.94   13.46
  -4  -7   0    7.44    9.95
   7   4   0    1.37   11.66
  -7  -4   0    5.40    9.60
   7   4   0   10.21   11.72
  -4  -7   0   22.69   13.20
 -11   4   0   17.31    8.92
  11  -7   0   15.31    9.76
   7   4   0  -13.60    9.27
  11  -4   0   -6.84    9.90
  -8  -3   0   21.88    9.50
  11  -8   0   34.18   10.18
   3   8   0   51.44   10.77
   3 -11   0   27.93   12.60
   3 -11   0    6.41   14.82
  -3  -8   0   18.31   10.52
 -11   3   0   14.15   13.78
 -11   3   0   30.95    9.96
  11  -3   0   24.86   11.88
   8   3   0   -7.27   11.60
  -8  -3   0   11.05    9.47
 -11   3   0   -0.11   13.38
 -11   8   0   11.92   10.47
  -8  -3   0    4.33   11.56
   3   8   0   32.54   11.90
   3 -11   0   17.86    7.20
  11  -8   0   22.41   10.30
   8   3   0   17.73   10.01
  11  -8   0   20.85   17.78
 -11   3   0   16.18    9.57
   8 -11   0   28.58   15.16
  11  -8   0   13.80    9.78
  11  -3   0    7.28    9.15
   8 -11   0   27.05    7.59
  -3  -8   0   44.82   14.92
  -3  -8   0   18.36    9.65
 -11   8   0   18.94    7.53
   3 -11   0   17.08    8.35
   8   3   0   26.00   11.71
  11  -8   0   22.51   25.25
  11  -3   0   41.73   14.11
   8 -11   0   18.86    6.21
   8   3   0   19.02    8.12
   3   8   0   31.24    7.47
   8 -11   0   30.19   18.26
  11  -3   0   10.11   12.62
   8 -11   0   19.12   10.94
  -8  -3   0   26.02   10.54
  -8  -3   0    8.20   14.99
 -11   8   0    9.26    7.34
  11  -3   0   21.60   13.45
   8 -11   0   29.20   10.70
   2 -11   0   71.43   11.57
  -9  -2   0   45.19   11.63
   9   2   0   79.40   12.72
   9 -11   0   73.57   14.17
  11  -9   0   95.92   22.52
 -11   9   0   67.20   13.55
 -11   9   0   73.96    7.74
  -2  -9   0   82.64   12.49
   9 -11   0   68.74    8.78
   9   2   0   70.67   10.03
  -9  -2   0   81.45   20.31
  11  -2   0   85.56   19.26
   2 -11   0   82.14   16.06
   9   2   0   71.53   12.57
   9 -11   0   84.50   19.31
  11  -2   0   78.82   12.99
  -9  -2   0   95.24   14.28
  -9  -2   0   80.63   16.10
   9 -11   0   73.63   19.14
 -11   2   0   75.16   12.29
  11  -9   0   78.87   11.07
   2   9   0   75.72   15.90
   2 -11   0   71.93   15.36
  -2  11   0   63.45   10.04
   9   2   0   48.62   16.94
 -11   2   0   48.44   16.63
  11  -2   0   66.49   14.33
  -2  -9   0   79.67   19.85
 -11   2   0   87.36   13.40
  -2  -9   0   77.38   13.75
  11  -9   0   95.23   14.49
   2 -11   0   44.76    9.40
  11  -9   0   70.12   16.82
  -9  -2   0   54.41   13.74
   2 -11   0   76.96   19.10
  11  -9   0   93.98   12.03
  11  -2   0  105.90   17.44
   9   2   0   91.97   13.85
   2   9   0   55.97    8.14
   2   9   0   69.38   11.48
 -11   2   0   68.88   17.44
  -2  -9   0   73.33   14.12
   9 -11   0   71.00   13.41
  11 -10   0   36.23   12.08
   1  10   0   32.64    6.06
 -10  -1   0   45.37   17.72
   1  10   0   40.42   13.54
  11 -10   0   46.07    9.07
  -1 -10   0  -18.59   18.28
   1 -11   0   29.68   14.21
   1  10   0   27.48    9.26
 -10  -1   0   29.48   10.22
  10 -11   0   38.56   12.45
 -11   1   0   -5.69   22.60
   1 -11   0   -6.00   15.53
  10   1   0    4.53   15.42
  10 -11   0   51.93    8.61
  10 -11   0   30.40   11.43
 -10  11   0   27.49   11.60
  11 -10   0   40.46    9.46
  -1 -10   0   30.21   13.43
  10   1   0   21.00    9.77
  10   1   0   33.31    9.29
  -1 -10   0   16.54   10.88
  10 -11   0   38.60   18.32
 -11   1   0   30.93   13.68
 -11  10   0   26.74   13.84
 -10  -1   0   36.64   14.14
  11  -1   0   23.06   10.63
 -11   1   0   10.50   13.52
  -1  11   0   23.65    8.98
  -1 -10   0   24.40   10.06
  10   1   0   19.41   11.34
  10   1   0   32.95   12.22
  11 -10   0    8.17   12.60
 -10  -1   0   33.68   10.93
 -11   1   0   48.24   12.16
  11  -1   0   32.21   11.40
   1 -11   0   28.72    9.15
   1 -11   0   35.03   10.96
  11  -1   0   47.20   17.33
 -11   0   0   75.02   17.73
  11 -11   0   49.88    9.67
  11 -11   0   82.66   21.42
 -11  11   0   47.08   12.80
  11   0   0   29.21   10.48
 -11   0   0   41.36   16.06
 -11   0   0   53.41   11.94
  11   0   0   51.92   14.37
  11   0   0   45.69   18.55
   0 -11   0    2.22   19.38
   0 -11   0   83.90   16.66
  11 -11   0   56.32   14.68
  11   0   0   44.32   23.05
   0  11   0   81.71   11.97
   0 -11   0   49.24   11.22
   6 -12   0  226.25   27.99
   6 -12   0  246.22   31.95
  -6  -6   0  205.63   19.53
  -6  -6   0  261.62   23.69
 -12   6   0  269.77   20.26
   6 -12   0  234.21   14.63
   6   6   0  229.42   23.66
  12  -6   0  226.46   20.53
   6 -12   0  253.75   19.39
  -6  -6   0  239.09   21.44
   6   6   0  269.75   23.51
   6 -12   0  256.22   22.55
   6   6   0  255.28   18.82
   6   6   0  308.02   22.50
  12  -6   0  221.56   25.34
   6 -12   0  231.04   20.77
  12  -6   0  297.33   29.91
  -6  -6   0  245.04   21.71
 -12   6   0  255.03   19.54
  12  -6   0  242.73   20.48
  -7  -5   0    1.62    9.65
 -12   5   0   16.66   12.95
   5   7   0   40.26   11.26
   7   5   0   19.94   11.53
   7   5   0    8.20   13.15
 -12   7   0    9.66    8.22
 -12   5   0   11.54   13.90
   5 -12   0   18.18    9.30
  -5  -7   0   30.13   13.33
   7 -12   0    3.26    9.34
  12  -7   0   15.27   10.78
   5   7   0    5.11   11.32
  12  -5   0   38.57   15.35
  -5  -7   0   34.27   12.64
   7 -12   0    6.64   14.43
  12  -5   0   22.05   12.02
   5 -12   0   19.33    6.62
 -12   5   0   15.68    9.64
  -7  -5   0   20.50   12.49
   7 -12   0   16.20    6.11
   7 -12   0   27.27   16.93
   5 -12   0   30.74   11.95
 -12   5   0    9.03   15.67
  -7  -5   0   24.25   10.99
  -5  -7   0   25.34   12.03
  12  -5   0   37.16   13.10
   7 -12   0   25.59   11.76
  -5  -7   0   21.40   12.03
   7   5   0   30.17   10.74
 -12   7   0   18.09   10.39
   7   5   0   -5.15    7.91
  12  -7   0   18.81   11.20
  12  -7   0    8.14   10.26
  12  -7   0   18.06   14.92
  12  -7   0   35.55   16.52
  12  -5   0   -0.16   13.41
  12  -5   0   29.65   10.88
  12  -4   0   91.76   18.44
   8 -12   0   53.92   19.22
  -8  -4   0   62.54   13.00
  12  -4   0   26.63   15.03
  -4  -8   0   24.00   10.85
   8   4   0   91.14   14.01
  12  -8   0   73.09   13.27
   4   8   0   58.68   12.00
 -12   8   0   52.63   13.94
   8 -12   0   37.30   11.52
   8   4   0   28.02   15.32
   4 -12   0   56.88   15.08
   4 -12   0   64.38    9.12
  12  -8   0   78.67   17.64
  12  -8   0   71.28   13.59
  12  -4   0   53.00   12.10
   8   4   0   42.49    9.94
 -12   4   0   96.51   16.40
 -12   4   0   44.37   12.01
   4   8   0   48.02   14.54
  12  -4   0   36.30   14.21
   8 -12   0   54.94   14.68
  -4  -8   0   35.68   13.19
  -8  -4   0   57.60   12.83
   4 -12   0   42.97   22.19
  12  -8   0   45.70   11.37
 -12   4   0   58.99   19.10
   8 -12   0   43.82    7.33
  -4  -8   0   91.90   17.07
   8   4   0   41.60   18.18
  -4  -8   0   41.30   12.69
  -8  -4   0   69.54   15.43
 -12   3   0  129.29   15.45
   3 -12   0  132.77   13.07
  -9  -3   0  153.05   20.09
  12  -3   0  128.16   17.65
   9 -12   0  139.72   11.74
   9 -12   0  123.42   19.08
   3 -12   0  150.74   19.85
   9   3   0  136.82   15.54
 -12   3   0  137.35   22.78
  12  -3   0  120.83   19.84
   9 -12   0  129.87   23.14
 -12   9   0  133.40   17.64
 -12   3   0  175.49   21.89
  12  -9   0  140.34   15.19
  12  -3   0  134.60   16.03
  -3  -9   0  124.61   15.79
  -3  -9   0  119.19   17.18
  12  -9   0  152.16   17.42
  -9  -3   0  131.85   16.53
  12  -9   0  161.06   16.90
   9   3   0  143.11   17.26
  -3  -9   0  175.36   19.61
  12  -3   0  139.77   25.69
   3   9   0  136.88   15.60
   3   9   0  135.26   20.73
  12  -9   0  145.38   21.44
  -9  -3   0  148.31   16.26
 -12   3   0  111.84   14.83
 -10  -2   0   21.54   13.10
  10 -12   0   19.86    6.84
  -2 -10   0   21.22   13.11
 -10  -2   0    6.24    9.33
  -2 -10   0   -2.56    9.83
  12  -2   0   28.82   13.51
 -12   2   0   15.05   15.05
  12 -10   0   23.53    9.36
   2  10   0   17.23    9.66
  -2 -10   0    9.59   16.82
  -2 -10   0   -4.41   11.06
 -12   2   0   16.89   10.43
  10 -12   0    3.80   10.69
 -12   2   0   36.62   20.77
   2 -12   0   12.31   14.14
  12  -2   0   -0.31   13.31
 -12  10   0   14.60   12.12
   2 -12   0   14.48    8.36
 -10  -2   0   34.79   11.56
  10   2   0   14.55   10.79
  10   2   0   11.96    9.94
  12 -10   0    5.53   13.35
   2 -12   0  -15.32   17.64
  10 -12   0   14.96   16.72
 -11  -1   0    9.79    9.77
  -1 -11   0  -26.82   11.87
  12 -11   0    4.69    7.96
 -12   1   0   -2.40    9.60
   1 -12   0  -11.22   12.56
  11 -12   0   13.62   17.44
  12  -1   0   -6.67   10.15
  11 -12   0    3.21    6.63
  12  -1   0  -10.36   20.78
   1  11   0    1.51    9.03
  11 -12   0   13.72   11.51
 -12  11   0  -27.10   10.30
   1 -12   0  -15.14    7.53
 -11  -1   0   -2.54   12.64
  11   1   0    1.54   11.59
  -1 -11   0   11.10    9.98
  12  -1   0   23.12   17.58
  12 -11   0   -7.16   12.59
  -1  12   0   -2.08    7.97
 -12   1   0   13.44   14.59
  -1 -11   0  -89.63   30.09
  12  -1   0  -14.91   11.44
  12 -12   0   87.30   11.97
   0 -12   0   91.33   19.17
  12 -12   0   78.71   24.05
   0 -12   0  103.67   14.47
  12   0   0   89.23   17.33
 -12   0   0   68.24   13.85
  12 -12   0   67.46   17.12
   0  12   0   91.88   13.16
 -12   0   0   74.96   19.10
 -12  12   0   77.98   15.93
   6   7   0    3.39   11.10
   7 -13   0   -9.64    8.95
  -7  -6   0    0.98   10.23
  13  -6   0   -1.46   11.92
  -6  -7   0   15.04   10.51
 -13   6   0   12.67   10.04
 -13   7   0   26.42   11.48
  13  -6   0   23.97   13.26
   7   6   0    7.32   11.67
  13  -7   0    3.29   11.17
   6 -13   0   17.48   12.10
   6 -13   0   15.83   16.85
   7 -13   0   -4.65   16.51
  13  -7   0    9.39   11.58
  -7  -6   0   12.25   10.95
  13  -7   0    0.76   15.46
  13  -6   0    7.97   16.99
   6 -13   0    9.43    6.27
   7 -13   0   14.29    6.30
  -6  -7   0   36.08   13.35
  -6  -7   0    4.29   11.72
 -13   6   0   11.42    9.98
  -7  -6   0   23.34   13.05
  13  -8   0  140.57   23.99
   8 -13   0  186.29   12.91
 -13   5   0  192.42   18.18
   8 -13   0  178.05   28.16
  13  -8   0  182.70   19.92
  -5  -8   0  153.53   18.90
 -13   5   0  164.40   26.79
  -5  -8   0  225.06   25.59
  13  -5   0  206.41   23.44
   5 -13   0  175.84   27.99
 -13   5   0  189.35   26.96
   8 -13   0  157.22   17.75
  -5  -8   0  152.04   18.70
   5   8   0  173.05   18.21
 -13   8   0  142.72   17.68
   8   5   0  171.24   19.49
  -8  -5   0  227.02   24.35
   5 -13   0  189.80   21.76
   5 -13   0  166.43   13.80
  -8  -5   0  187.25   20.52
  13  -8   0  155.33   17.50
  -8  -5   0  190.40   18.92
  13  -5   0  169.41   20.29
  13  -5   0  150.27   22.84
  -9  -4   0    9.70   13.00
   9 -13   0    0.13   15.80
  13  -4   0    1.42   12.73
 -13   4   0    9.90   16.13
  -9  -4   0   -2.49    9.42
   4 -13   0    3.82   13.78
   9 -13   0   -8.03    9.91
  13  -9   0   14.99   10.50
  -4  -9   0   45.21   14.73
 -13   4   0    5.08   10.03
 -13   9   0   -3.09   10.95
  -9  -4   0    7.83   10.39
   9   4   0   22.09   12.75
   9 -13   0    5.23    5.84
  13  -9   0   15.05   15.58
  13  -4   0  -12.93   12.93
   4 -13   0    8.73    7.11
  -4  -9   0   -7.25   10.31
   4 -13   0  -13.07   15.76
  13  -4   0   25.61   14.51
   4   9   0    8.86   10.74
  -4  -9   0  -14.92   11.19
  10 -13   0    2.34   10.70
  -3 -10   0   57.85   20.87
  13 -10   0   -5.14    9.30
  10 -13   0    2.69   16.64
   3 -13   0  -21.49   12.58
 -13   3   0    5.82    9.82
  10   3   0  -10.63   10.79
  13  -3   0  -16.19   12.13
  13 -10   0  -21.06   13.70
  -3 -10   0   16.42   11.93
  13  -3   0   -5.80   14.27
 -10  -3   0   13.19   15.28
   3  10   0   -7.70    9.85
 -10  -3   0   -9.67    9.79
 -13   3   0  -16.70   14.19
 -13  10   0    1.53   11.67
   3 -13   0  -35.77   14.84
  -3 -10   0   14.73   13.58
  10 -13   0  -11.49    5.22
  13  -3   0    2.56   13.71
   3 -13   0    2.96    7.70
 -13  11   0  779.45   41.16
  -2 -11   0  857.88   44.59
   2 -13   0  680.37   51.44
   2  11   0  766.45   37.70
   2 -13   0  827.49   36.46
 -13   2   0  855.49   39.80
  -2 -11   0  785.96   39.86
 -11  -2   0  786.17   39.23
  13 -11   0  861.61   38.08
  13 -11   0  834.34   47.94
  11 -13   0  798.81   33.26
  11 -13   0  833.03   43.78
  -2 -11   0  920.27   50.54
  11   2   0  813.25   42.87
   2 -13   0  770.33   44.62
  13  -2   0  822.62   45.21
  11 -13   0  811.48   53.32
 -13   2   0  848.16   49.83
  13  -2   0  770.02   42.97
 -11  -2   0  878.60   46.75
 -13   1   0   -4.35   14.66
  13 -12   0   13.61   14.30
 -13  12   0   -6.92   11.69
  13 -12   0   -5.86    8.06
  12 -13   0    6.67    7.62
   1 -13   0   -9.10    8.03
  12   1   0   -0.73   12.46
  13  -1   0   14.02   13.72
 -12  -1   0    5.09   13.63
 -12  -1   0    5.23   10.49
  -1 -12   0  -21.46   13.78
   1  12   0   10.05   10.16
 -13   1   0    6.60   10.66
  12 -13   0  -14.50   18.07
   1 -13   0   -7.69   14.78
  12 -13   0  -12.92   10.54
  13 -12   0    2.85   18.16
  -1 -12   0    6.19   10.59
 -13   0   0   14.79   11.51
  13 -13   0   14.69    9.14
   0 -13   0   13.16   16.78
  13   0   0    4.67   14.69
  13 -13   0   -4.36   19.65
   0 -13   0    1.80    9.22
 -14   7   0   71.71   14.38
   7   7   0   38.97   14.34
   7 -14   0   39.87    7.70
   7 -14   0   82.26   16.83
  14  -7   0   14.79   17.89
  -7  -7   0   46.18   13.77
  14  -7   0   37.44   14.79
  -7  -7   0   35.36   13.53
  14  -7   0   23.49   13.64
   7 -14   0   36.25   19.56
   8 -14   0   51.22    8.06
  14  -6   0   73.10   17.30
  14  -8   0   67.83   20.09
 -14   6   0   65.63   13.70
 -14   8   0   37.28   12.83
  -6  -8   0   27.65   13.21
   8 -14   0   47.65   20.17
  14  -6   0   33.32   14.61
   6 -14   0   55.67   16.26
   6 -14   0   54.23    9.10
  -8  -6   0   37.85   14.15
   8   6   0   26.75   14.10
   6   8   0   68.59   15.01
  14  -8   0   35.71   13.78
  -6  -8   0   50.72   14.83
   6 -14   0   38.61   19.97
  -8  -6   0   53.05   14.19
  14  -6   0   49.99   20.00
  -5  -9   0   25.93   12.72
  14  -5   0   -3.97   13.55
   9   5   0   12.05   12.70
  -9  -5   0    7.51   10.97
  14  -5   0  -19.44   12.12
   5 -14   0   -1.32    6.43
   9 -14   0   -0.83    5.28
  -9  -5   0    9.12   12.24
   9 -14   0  -10.38    9.60
  -5  -9   0    6.66   12.48
  14  -9   0    3.59   11.82
   5 -14   0  -21.44   12.61
   5 -14   0  -12.71   16.47
   5   9   0   21.45   12.21
   9 -14   0    4.47   17.09
 -14   5   0   -8.65    9.88
  14  -9   0  -10.90   15.17
 -14   9   0    5.56   12.00
  14  -5   0  -21.45   14.56
 -14   4   0  120.55   25.32
 -14  10   0  100.71   17.89
   4  10   0  124.42   16.79
   4 -14   0  128.57   13.14
  10 -14   0   75.53   15.23
   4 -14   0   78.63   19.19
  10 -14   0  119.34   24.76
  -4 -10   0  113.70   18.56
  14 -10   0   85.34   20.91
  10   4   0   67.67   16.88
  14  -4   0   95.36   20.34
  10 -14   0  111.46   10.67
   4 -14   0   97.39   24.86
 -10  -4   0   98.32   15.81
  14 -10   0  130.53   17.03
 -14   4   0  142.95   17.40
  14  -4   0   99.01   20.58
  14  -4   0  103.14   19.92
  -4 -10   0  110.90   17.23
 -14   3   0    4.26   10.78
  14 -11   0   16.69   17.23
  14 -11   0    0.43   24.93
  11 -14   0   24.89   12.41
  -3 -11   0    1.89   11.12
 -14   3   0   12.35   17.61
  11   3   0   13.00   16.87
   3 -14   0    3.96   15.34
   3 -14   0  -40.86   19.36
  -3 -11   0  -13.24   22.20
  11 -14   0    4.92   11.65
   3  11   0   13.69   11.23
 -14  11   0    6.28   13.00
  14  -3   0    4.21   14.86
 -11  -3   0   31.65   12.54
  14  -3   0  -16.57   14.44
   2 -14   0   -1.45    8.36
   2 -14   0   -7.43   16.33
  12   2   0  -17.65   13.93
 -14  12   0   -4.32   12.30
 -14   2   0    5.71   17.13
  14 -12   0   -8.26    9.16
  12 -14   0   -6.23   19.07
  12 -14   0  -12.83   11.50
 -14   2   0    7.05   10.68
  -2 -12   0   13.29   11.35
  14 -12   0  -11.21   14.49
  -2 -12   0    6.31   15.21
  14  -2   0   -1.68   15.06
  12 -14   0    3.28    6.74
   2  12   0  -17.15   13.34
   7 -15   0   -1.36   13.30
  -8  -7   0   16.80   13.51
   8   7   0   -6.35   12.78
  15  -7   0  -17.20   28.50
  -7  -8   0    1.15   12.72
  15  -8   0  -15.23   16.07
 -15   8   0   -0.04   11.46
  -7  -8   0    0.57   11.88
  -8  -7   0   -1.45   11.72
   7 -15   0   -6.23   17.56
  15  -7   0   14.97   14.70
  15  -8   0    1.81   12.91
 -15   7   0    1.49   10.76
   8 -15   0   18.07   14.44
   8 -15   0  -18.76   18.25
   7 -15   0   -0.21    6.62
   9 -15   0   -2.56    5.52
   6 -15   0   -9.08   18.30
   6 -15   0    3.34    6.27
   6 -15   0  -11.98   13.71
  15  -6   0  -12.34   12.58
   6   9   0  -19.25   19.48
  15  -6   0   -2.35   13.49
  15  -9   0  -20.71   15.90
 -15   9   0  -14.73   11.57
  -9  -6   0    0.41   11.91
   9 -15   0  -19.15   18.98
  -6  -9   0   -0.54   12.91
   9   6   0  -10.03   12.72
  15  -9   0  -14.17   12.46
  -6  -9   0    1.74   12.57
 -15   6   0    0.38   10.72
  -1   0  -1   -4.98    3.64
   1  -1   1   -0.92    1.13
   0  -1   1    1.24    2.17
   0  -1  -1    4.06    3.52
   0  -1  -1    0.40    1.32
   1   0   1   -1.81    1.99
   1   0  -1    3.14    1.70
   1   0  -1    0.57    1.71
   0  -1   1   -1.14    2.61
   0  -1   1    0.89    1.18
   0  -1  -1   -0.88    1.98
  -2   1  -1    5.43    5.26
   1   1  -1   12.09    6.00
  -1   2  -1    4.87    4.03
   1   1  -1   -4.39    2.93
   2  -1  -1   -5.32    2.53
   1  -2   1    3.65    3.79
  -1   2  -1   -4.79    4.70
  -2   1   1   -3.83    4.70
   1  -2   1    1.77    5.43
  -1  -1  -1    0.49    3.99
  -1  -1  -1    8.25    4.18
   2  -1  -1   -2.79    5.07
  -1   2  -1   -4.24    3.22
   1  -2   1   -1.71    2.01
  -1  -1  -1    0.40    2.46
  -1  -1   1    5.73    3.24
  -1   2  -1    1.57    2.18
   1  -2  -1   -3.38    3.68
   2  -1   1   -1.11    4.74
  -1  -1  -1    1.55    3.62
  -2   1   1    6.76    5.38
   1  -2  -1    1.28    3.11
   2  -1   1    3.18    5.58
  -1  -1   1   -3.20    3.11
   2  -1  -1    0.15    2.69
   1   1   1   -1.11    4.48
  -1  -1  -1    0.25    4.86
  -2   1   1    6.37    3.54
  -2   1  -1    6.14    2.99
  -2   1  -1    1.78    4.26
  -1  -1   1    3.56    3.59
  -2   1  -1   -2.68    4.41
   2  -1  -1    3.97    7.00
   1   1   1    4.62    2.29
   2  -1  -1   -1.13    4.61
  -2   1  -1   -3.28    3.38
  -1   2  -1   -1.28    4.97
   1   1   1    2.07    3.30
   2  -1   1   -0.36    3.16
   1  -2   1    1.06    2.92
   1   1  -1   -3.17    2.85
   1  -2   1   -0.80    4.37
   1   1  -1   10.68    5.40
   1   1  -1   -1.76    3.20
   1   1   1    3.32    4.02
  -1  -1   1   -1.56    5.29
   1   1   1   -1.77    2.19
   2  -1   1    2.61    3.51
   2  -1   1   -4.74    5.15
  -1  -1  -1    3.15    3.15
  -1   2  -1   -0.75    2.31
   1   1  -1   -2.79    3.59
  -2   1   1    1.61    3.13
  -1  -1   1    9.32    5.61
   2  -1   1    5.13    3.03
   2  -1  -1   -0.38    3.75
   0  -2   1   10.90    1.96
   2  -2  -1   12.13    4.33
   2   0   1    8.83    3.91
   2   0   1    4.21    4.78
   2   0   1    2.94    6.96
  -2   0  -1   13.01    4.09
   0  -2   1   12.22    4.59
  -2   0   1   13.68    4.17
  -2   2  -1   15.84    4.45
  -2   2   1   15.79    5.12
   0   2   1   -0.64    4.18
   0  -2  -1    5.22    4.07
   2   0  -1   11.18    6.80
   2   0   1   16.55    4.42
   0  -2  -1    5.14    4.52
   2   0  -1    9.98    3.50
   0  -2   1   19.58    3.70
  -2   2  -1    6.08    5.63
   0   2   1   -0.84    3.97
   0  -2  -1    8.45    2.87
  -2   0   1   13.49    4.01
   2  -2   1   10.69    6.23
  -2   2   1    5.06    7.68
  -2   2  -1    3.16    5.03
  -2   0   1   13.84    6.74
  -2   2   1    6.88    4.30
   0   2  -1   12.40    3.14
   0   2  -1   11.83    5.02
  -2   0  -1    7.45    3.73
   2   0  -1   15.51    6.69
   2  -2  -1    3.12    4.21
   2  -2   1    8.09    2.90
   0  -2  -1   10.15    4.86
   2  -2  -1    5.93    6.89
  -2   2  -1   14.48    3.07
   2   0  -1    5.62    4.30
   0   2   1   12.36    4.89
   0  -2  -1    5.16    3.64
   0   2   1   14.99    4.04
   0   2   1   10.92    2.64
   2   0   1    4.93    4.12
   0   2   1   16.34    2.76
   2  -2   1    0.89    4.51
   2   0   1    5.52    6.63
   2  -2  -1    9.43    6.84
  -2   0  -1    6.15    4.74
   2   0  -1    5.50    3.55
   0  -2  -1    2.84    2.30
  -2   0  -1    7.29    4.46
   0   2  -1    1.59    2.87
   2  -2   1   13.39    4.32
  -2   0   1    9.79    5.78
   0  -2   1   18.25    6.80
   0  -2   1    2.95    3.73
   2   0  -1    3.50    5.70
  -2   2   1   12.79    3.80
   2  -2  -1    9.18    4.27
   0   2  -1   14.93    5.48
   0   2  -1    5.67    3.41
  -2   0  -1   12.06    4.66
  -2   0  -1   11.46    6.23
  -2   0   1    7.12    4.07
   3  -1   1  612.93   22.37
  -3   2  -1  611.25   23.60
   1   2   1  602.79   22.95
   3  -2  -1  633.59   22.04
   1   2   1  612.90   21.30
  -1   3  -1  572.60   21.86
  -3   1   1  589.32   21.44
  -2  -1  -1  601.11   22.42
  -1   3  -1  602.65   20.27
  -1  -2   1  617.80   22.24
  -3   2  -1  606.85   22.20
  -1   3  -1  585.27   23.27
  -1  -2   1  593.21   21.94
   2   1  -1  647.18   22.02
  -2   3   1  577.72   23.32
  -1   3  -1  591.68   25.02
   1  -3  -1  647.17   20.67
   3  -2  -1  603.76   21.54
   1  -3  -1  602.05   19.82
  -3   1   1  582.69   21.81
   3  -2  -1  626.56   23.59
  -3   1   1  576.65   27.07
   3  -1   1  622.64   24.48
   2  -3   1  610.72   24.13
   2  -3   1  627.50   24.64
  -3   2  -1  570.09   26.20
   3  -2  -1  602.67   21.74
  -2  -1  -1  624.76   25.54
   3  -1   1  630.28   22.13
  -2  -1  -1  581.40   22.17
  -3   2  -1  597.94   21.02
  -2  -1  -1  630.47   21.66
   1   2   1  628.39   22.30
   1  -3  -1  614.08   25.10
   2  -3   1  567.67   27.39
   1   2   1  601.67   19.80
   2   1  -1  717.52   30.19
   3  -1   1  600.03   22.06
  -2  -1  -1  593.86   22.96
   3  -1   1  616.21   25.67
   2   1  -1  594.10   25.26
   2  -3   1  589.68   21.01
   1  -3  -1  602.05   21.73
   2   1  -1  613.15   21.91
  -3   1   1  591.31   24.74
   2   1  -1  595.23   22.55
  -1  -2   1  574.29   21.82
  -3   1   1  573.06   25.43
   3  -1   1  581.83   24.18
  -2  -1  -1  590.90   22.10
  -1   3  -1  596.35   20.62
   3  -2  -1  588.90   25.71
  -1  -2   1  637.06   24.52
  -1  -2   1  636.45   25.03
  -3   1   1  619.06   22.02
   2   1   1  627.91   21.20
  -1  -2  -1  622.10   24.17
   2   1   1  615.29   22.17
  -3   1  -1  626.08   22.21
  -3   1  -1  593.48   24.80
   3  -1  -1  548.37   24.44
   3  -2   1  597.93   23.94
   3  -1  -1  597.39   25.27
   1   2  -1  607.05   21.63
   2   1   1  603.29   21.92
   1  -3   1  581.30   20.79
  -2   3  -1  636.90   20.72
  -1  -2  -1  589.53   21.53
  -2   3  -1  633.73   25.29
  -2   3  -1  619.61   24.27
  -2  -1   1  640.15   22.60
   1   2  -1  623.56   22.02
   1   2  -1  604.13   22.03
  -1  -2  -1  605.66   22.23
   3  -2   1  598.05   21.22
  -3   1  -1  598.68   25.00
   1  -3   1  580.95   20.70
   3  -1  -1  623.79   22.43
   3  -2   1  616.25   26.39
  -2  -1   1  596.89   21.86
  -1  -2  -1  641.88   22.46
  -3   2   1  618.62   21.93
   2  -3  -1  622.82   26.05
  -1   3   1  592.42   21.53
   3  -1  -1  601.25   26.98
  -3   1  -1  599.43   21.72
   2   1   1  596.53   22.53
  -2  -1   1  569.94   24.19
  -3   2   1  610.45   23.60
   2   1   1  589.98   23.69
  -3   1  -1  595.78   24.79
   2  -3  -1  581.75   23.27
   3  -2   1  592.37   25.72
   1  -3   1  532.98   22.61
   1  -3   1  606.68   25.47
  -1  -2  -1  586.44   19.79
   3  -1  -1  606.32   21.62
   1  -3   1  602.61   21.49
  -2   3  -1  574.61   20.69
  -1  -2  -1  615.44   23.41
  -3   2   1  592.80   21.82
   1  -3   1  608.22   22.14
   1   2  -1  615.07   24.14
   2   1   1  573.75   25.44
   3  -1  -1  608.53   21.98
  -3   2   1  564.13   25.45
  -3   1  -1  586.57   22.00
  -2  -1   1  570.35   25.32
   0  -3   1  232.57    8.69
   0   3   1  224.14    9.66
  -3   0  -1  261.50   14.23
   0  -3  -1  230.61   12.72
  -3   0   1  252.16   12.23
   3  -3  -1  240.52   13.43
   0  -3   1  224.06   12.93
   0   3  -1  214.41   11.23
  -3   0  -1  231.96   14.08
   0  -3  -1  232.24    9.46
  -3   0   1  252.86   17.34
   3  -3  -1  239.55   18.32
   3  -3  -1  244.27   12.16
   3   0   1  222.97   14.04
   3  -3  -1  229.61   18.80
   0   3  -1  208.88   14.42
   3  -3   1  241.52   17.15
   3   0  -1  285.60   15.91
   0   3   1  237.11   14.00
   0   3  -1  255.94   10.55
  -3   3  -1  236.09   10.39
  -3   0  -1  288.00   21.06
   0  -3   1  246.84   15.81
  -3   0  -1  202.58   12.27
  -3   0  -1  242.91   12.41
  -3   3  -1  221.32   16.54
   3  -3   1  228.55   19.03
   3   0  -1  231.78   12.19
   3   0   1  225.06   12.22
   0  -3   1  228.91   11.58
   0  -3   1  221.99   11.14
   3   0  -1  227.42   12.72
  -3   0  -1  239.82   12.55
   3   0   1  237.84   17.73
   3  -3   1  218.70   12.60
   3  -3   1  232.96   10.71
   3  -3  -1  229.20   11.98
  -3   0   1  219.43   12.29
  -3   3   1  234.87   10.95
   3   0  -1  236.18   17.44
   0   3  -1  254.83   14.76
  -3   3   1  230.86   11.78
   0   3   1  220.83   11.86
  -3   0   1  219.70   14.66
   0  -3  -1  232.23   10.57
   3   0  -1  248.22   11.67
   3   0  -1  219.93   15.13
   3   0   1  251.01   12.26
  -3   0   1  188.36   16.66
   0  -3  -1  229.35   12.03
   0   3   1  233.04   12.22
  -3   3  -1  225.10   13.51
  -3   3  -1  257.69   12.29
   3  -3   1  216.01   13.67
   3   0   1  252.14   13.07
   0  -3  -1  258.86   14.46
  -3   0   1  245.12   12.57
  -3   3   1  235.11   13.47
   0  -3  -1  226.75   12.88
  -2  -2  -1    2.31    3.57
  -2  -2   1   -2.45    4.12
   2   2  -1    9.63    7.80
   2   2   1    6.66    7.72
   2  -4   1   -3.11    3.57
   2   2   1    2.45    4.15
  -2  -2  -1  -11.09    6.67
   4  -2  -1    7.66    7.44
  -2  -2   1   -3.92    5.10
   2  -4  -1    6.57    3.05
   4  -2  -1   -3.12    8.29
   2  -4  -1   -0.41    6.94
   2   2   1    3.22    4.72
   2  -4  -1    9.31    6.29
   4  -2   1   15.22    7.73
  -2  -2   1   -2.29    9.07
   2   2  -1   -0.31    5.22
   4  -2   1   10.91    8.55
   2  -4   1    2.97    8.42
   2  -4   1    3.02    3.66
   4  -2  -1   -0.67    4.71
  -4   2   1    1.60    4.74
   2   2   1    2.77    5.38
  -4   2  -1    3.77    4.22
  -2   4  -1    2.76    2.88
   4  -2   1    0.82    4.74
   4  -2   1    0.42    5.05
  -2  -2  -1   -1.40    7.08
  -4   2   1    4.27    7.71
   2   2  -1   -8.49    7.60
   4  -2   1    5.62    8.24
   4  -2  -1   -5.17    5.11
   2  -4  -1    5.27    4.69
   2  -4  -1    1.13    3.06
  -2  -2  -1   -7.83    5.59
  -4   2   1   -1.89    4.48
  -4   2  -1    5.86    7.95
  -4   2  -1    9.77    7.00
   2   2  -1    5.95    2.88
   2  -4   1    0.60    6.31
   2  -4   1   -3.87    6.73
  -2  -2  -1    3.05    5.22
  -4   2  -1    0.94    7.34
   2  -4  -1   -0.08    8.42
  -2  -2   1   -6.77    7.76
  -4   2   1    8.39    7.03
   4  -2  -1    4.36    9.65
   2   2  -1    1.55    4.80
   2   2   1    0.02    2.95
   4  -2   1   -7.10    4.39
   2   2  -1   -3.92    4.75
  -4   2  -1   -6.00    4.89
  -2  -2  -1   -2.45    3.88
  -4   2   1  -23.49    8.64
  -2  -2   1    7.21    5.36
   2   2   1    4.19    7.00
  -2   4  -1   -5.38    6.75
  -2   4  -1    8.66    4.26
   4  -2  -1   -2.61    4.41
   4  -1   1    0.80    8.31
   4  -1   1   12.42    5.35
  -1  -3   1    2.46    5.05
  -4   3  -1    4.72    5.12
   4  -3  -1   -2.11    9.16
  -4   1   1    1.24    4.92
   4  -1   1    3.81    5.17
   1  -4  -1   10.31    4.53
  -4   1   1    5.72    7.86
   4  -3  -1    4.61    4.80
  -4   3  -1    3.80    4.16
   3   1  -1    6.78    5.13
   1   3   1   12.06    5.54
  -4   1   1    1.48    7.84
   3   1  -1   13.93    5.03
   3   1  -1    5.69    4.84
   4  -3  -1    5.52    6.58
   1  -4  -1    1.43    5.77
  -3  -1  -1    0.69    6.43
   3   1  -1    5.59    4.70
   1   3   1    0.24    5.89
   3  -4   1   -5.35    6.72
   1  -4  -1    5.70    3.36
   3  -4   1    7.78    3.87
   1   3   1    2.89    2.24
  -4   1   1   10.20    4.99
  -4   3  -1    9.59    7.73
  -1  -3   1   11.80    7.86
   1   3   1    4.57    6.08
   1   3   1   -0.05    4.08
  -3   4   1   -4.20    6.59
   1  -4  -1    3.13    4.22
   4  -3  -1    6.39    5.05
  -4   1   1    0.43    8.90
  -3  -1  -1    0.12    5.00
  -1   4  -1    4.38    7.21
   1   3   1    0.34    4.96
   1  -4  -1   13.24    7.87
   3   1  -1   13.89    9.67
   4  -3  -1   10.85    9.32
  -1  -3   1   -0.09    5.60
  -3  -1  -1    5.18    5.14
   3  -4   1    7.81    8.24
   4  -1   1   11.77    7.21
  -1   4  -1   -0.72    4.04
   4  -1   1    3.58    6.78
  -3  -1  -1   16.82    5.45
  -4   1   1    0.07    4.67
   1  -4  -1    3.27    5.02
   3  -4   1    8.29    4.54
  -3  -1  -1   -1.06    7.28
  -1  -3   1    5.29    4.80
  -1  -3   1    7.08    4.66
  -1   4  -1    5.19    3.19
   4  -3  -1    3.76    4.50
   4  -1   1    4.19    4.89
  -3  -1  -1   11.28    5.09
  -4   3  -1   10.34    6.06
  -1   4  -1    5.40    5.43
   3   1  -1   -1.90    8.08
   1   3  -1    6.99    6.66
  -1  -3  -1   14.65    5.46
  -3  -1   1    0.54    5.16
  -1  -3  -1   12.55    6.98
   3   1   1    8.38    4.21
   4  -1  -1   -0.63    4.64
   4  -3   1   -0.01    8.63
  -1  -3  -1   -1.39    4.17
   3  -4  -1   -4.05    4.65
   4  -1  -1    5.62    4.93
  -3   4  -1    1.54    6.90
   4  -3   1   10.83    4.72
  -3  -1   1    7.99    4.95
   4  -3   1   -0.50    9.28
   3   1   1    9.87    5.03
  -3   4  -1   -6.76    7.13
  -4   3   1    2.00    5.02
   1  -4   1    6.64    4.46
   1   3  -1    7.50    4.96
   1  -4   1    3.96    4.66
   4  -1  -1    5.07    5.20
   1   3  -1    1.52    4.36
   3  -4  -1   10.75    8.95
  -4   3   1    4.49    4.44
   4  -3   1    4.67    5.82
  -4   3   1    3.50    8.66
  -4   1  -1    6.64    4.96
   3   1   1    6.70    5.69
  -4   3   1   -5.83    5.90
  -3   4  -1    1.04    3.41
  -4   1  -1    2.74    5.34
  -1  -3  -1    7.54    2.33
   1  -4   1   12.98    4.96
   1  -4   1    2.72    3.99
   3   1   1   -0.09    8.65
   4  -1  -1   -1.98    7.83
   4  -1  -1   -7.20    8.69
   1  -4   1    5.77    7.80
  -3  -1   1   -3.97    7.95
  -4   1  -1    1.79    7.92
   4  -1  -1    2.35    7.84
   3   1   1    4.08    4.70
   3  -4  -1   12.87    7.23
  -3  -1   1    6.03    5.37
  -4   1  -1    9.22    7.31
  -3  -1   1   12.40    7.53
   3  -4  -1    4.33    3.99
  -4   1  -1    9.92    7.89
   1   3  -1   -5.97    4.87
   3  -4  -1   -4.49    8.91
  -1   4   1    8.36    7.18
  -1  -3  -1    3.77    6.51
  -4   1  -1    7.97    4.87
  -1  -3  -1   -3.63    4.79
   3   1   1   -4.71    6.89
  -3   4  -1    1.94    3.81
  -1   4   1    5.19    4.59
   4  -3   1    6.20    5.52
  -4   0   1  141.77   13.54
   4   0  -1  171.99   11.02
  -4   0  -1  150.39   10.84
   4  -4  -1  105.90   12.76
   0   4  -1  135.71   12.32
   4   0   1  153.31   13.22
   0  -4   1  135.66   11.44
   4   0   1  156.11   14.57
   0  -4  -1  159.45   11.54
  -4   4   1  153.69    9.02
   4  -4  -1  138.73   12.10
  -4   0  -1  193.82   16.49
   0  -4   1  152.10    6.63
  -4   4   1  128.56   10.16
   0  -4  -1  122.17   12.88
   4  -4  -1  144.87   10.52
   0   4  -1  159.68   10.21
   4   0   1  177.32   11.83
  -4   0   1  150.84   13.30
   4   0  -1  151.16   13.39
  -4   4  -1  140.86    8.91
   0   4   1  167.09   10.52
   4  -4   1  161.16   12.30
  -4   0  -1  165.16   12.65
   4  -4   1  154.00   11.02
  -4   0  -1  151.09   11.15
   0  -4  -1  146.15   11.12
   4   0  -1  148.08   14.07
   4   0  -1  122.06   12.08
   4  -4   1  158.23    9.42
   0  -4   1  162.29   14.41
   0  -4   1  123.08   11.09
  -4   0  -1  166.67   11.31
   4  -4  -1  146.71   17.56
   0  -4  -1  163.55    9.41
   0   4   1  163.57    8.15
   0  -4   1  152.45   10.38
   0   4  -1  153.95    8.58
   4   0   1  181.16   11.49
   0   4  -1  141.58   12.98
   4   0  -1  159.19   11.48
   0  -4   1  152.92   10.00
   0   4   1  146.91   12.72
   4  -4   1  160.73   17.95
   4   0   1  163.05   10.87
   4   0   1  165.95   11.96
   4  -4   1  162.64   14.81
   0  -4  -1  168.37   11.54
  -4   4  -1  146.41   10.14
  -4   0   1  173.12   11.25
  -4   0  -1  172.89   13.88
  -4   4  -1  131.73   13.16
   0  -4   1  162.45    6.49
  -4   4   1  149.64   12.46
  -4   0   1  154.16   11.08
   4  -4  -1  160.08   10.68
   0   4   1  146.33   10.24
  -4   0   1  145.48   10.92
   4   0  -1  135.51   10.18
  -4   4  -1  137.91   12.59
   3  -5   1  328.97   13.11
  -2  -3   1  316.75   20.65
  -5   3  -1  285.70   19.99
  -3  -2  -1  336.24   15.53
   5  -3  -1  323.10   20.35
   2  -5  -1  333.73   12.18
  -2  -3   1  319.31   15.29
  -5   2   1  298.77   14.70
   3   2  -1  281.10   14.68
   2  -5  -1  299.22   12.60
  -2   5  -1  324.58   12.52
   2  -5  -1  295.84   14.54
   2   3   1  304.39   16.86
   3  -5   1  304.29   21.83
  -3  -2  -1  313.17   14.90
  -5   3  -1  305.90   14.03
   5  -2   1  270.02   19.75
   3   2  -1  345.03   20.28
  -5   2   1  302.95   14.56
   5  -3  -1  300.55   22.20
   3  -5   1  299.44   17.57
   5  -3  -1  319.50   15.18
   2  -5  -1  296.78   16.25
  -2   5  -1  301.56   13.26
  -5   3  -1  311.66   17.30
  -2  -3   1  289.16   18.26
   2   3   1  289.63   11.28
   2   3   1  322.44   15.55
   5  -3  -1  314.14   17.47
   5  -3  -1  318.36   15.42
  -2   5  -1  308.39   11.31
   3  -5   1  294.27   13.19
  -3  -2  -1  297.40   15.40
  -5   2   1  287.94   14.70
   3   2  -1  306.32   15.81
  -5   2   1  306.89   18.91
   3   2  -1  307.34   12.59
   5  -3  -1  276.33   14.71
  -5   3  -1  315.95   15.33
   5  -2   1  282.60   15.00
  -3  -2  -1  278.85   16.72
   5  -2   1  290.13   19.02
  -3  -2  -1  289.83   19.18
   3  -5   1  321.21   18.74
   2  -5  -1  322.90   17.94
  -2  -3   1  292.91   15.06
   2   3   1  332.52   14.27
   3   2  -1  287.89   14.77
  -3  -2  -1  300.27   15.72
  -5   2   1  311.51   19.44
   5  -2   1  306.30   15.05
   3   2  -1  277.95   20.00
  -5   3  -1  296.24   20.82
   5  -2   1  291.13   18.56
   2  -5  -1  296.83   19.94
  -2  -3   1  316.17   15.78
   2   3  -1  291.39   19.51
   2   3  -1  299.56   17.95
   2  -5   1  285.79   12.98
  -5   3   1  307.96   20.12
   3  -5  -1  319.78   19.08
  -3  -2   1  290.13   15.41
   2  -5   1  291.94   16.13
   5  -2  -1  306.36   15.50
   5  -2  -1  289.28   18.95
   3   2   1  310.64   12.77
  -2  -3  -1  278.62   18.27
  -3   5  -1  304.89   19.21
   5  -3   1  309.09   15.49
  -5   3   1  292.15   14.67
   3   2   1  329.61   19.42
  -2  -3  -1  317.65   18.78
   2  -5   1  305.84   13.63
   2   3  -1  319.76   15.41
   3  -5  -1  319.68   17.44
   2   3  -1  313.08   14.65
   5  -2  -1  331.99   19.13
   3  -5  -1  300.42   14.23
  -3  -2   1  306.29   19.51
   3  -5  -1  302.73   12.04
   3   2   1  305.48   14.69
   5  -3   1  280.94   20.32
   2  -5   1  303.55   13.38
  -5   3   1  313.51   17.59
   3   2   1  312.78   15.79
  -5   2  -1  302.50   20.52
  -2   5   1  296.92   13.94
  -2  -3  -1  313.75   15.69
  -5   2  -1  281.98   14.94
  -5   3   1  321.84   14.74
   2  -5   1  270.12   19.74
   3  -5  -1  296.81   21.39
   5  -2  -1  293.95   14.41
  -3  -2   1  308.60   15.27
  -2  -3  -1  320.65   15.08
   5  -2  -1  294.36   15.87
   3   2   1  309.25   20.24
   2  -5   1  315.45   16.93
   5  -3   1  293.33   14.62
   5  -3   1  303.07   15.46
  -2  -3  -1  288.47   14.92
   5  -3   1  327.36   20.77
  -3  -2   1  293.68   15.20
  -5   2  -1  292.60   19.58
   2   3  -1  304.43   14.99
  -3  -2   1  302.62   17.86
   5  -3   1  273.25   17.36
  -2  -3  -1  306.47   13.04
  -3   5  -1  355.33   17.98
   3   2   1  324.21   15.21
   5  -2  -1  344.29   21.73
  -5   2  -1  302.73   18.43
  -5   2  -1  316.08   14.95
   5  -4  -1    9.25   10.40
   5  -4  -1   12.16    5.40
   5  -1   1   12.01    6.47
  -1   5  -1   20.81    8.39
  -4  -1  -1   19.68    7.31
   1   4   1   24.00    6.06
   4   1  -1   11.04    5.89
   5  -1   1    1.68    5.43
  -1   5  -1   13.57    4.84
  -1   5  -1   16.64    3.70
  -5   4  -1   12.43    6.03
   1  -5  -1   13.56    8.01
   1  -5  -1   22.84    5.64
  -4  -1  -1   14.92    5.40
   4  -5   1   22.81    8.89
   4   1  -1   -1.05    9.12
   4  -5   1   14.39    4.81
  -1  -4   1   11.50    5.43
   1  -5  -1   19.56    4.57
   4   1  -1   12.54    9.15
   5  -4  -1    9.69    5.49
   5  -1   1   20.99    6.67
  -4  -1  -1   15.90    6.22
   1   4   1    4.75    6.02
   5  -4  -1   19.72   10.82
   1   4   1   11.49    6.59
   1  -5  -1    6.49    5.50
  -1  -4   1   11.02    8.67
   4  -5   1   14.25    4.39
  -5   4  -1   10.48    9.30
  -5   4  -1   15.82    4.37
   5  -1   1   25.54    9.33
  -5   1   1    9.91    5.60
   1  -5  -1   13.76    4.01
  -5   1   1   19.16    6.13
  -1  -4   1    8.89    5.60
  -1  -4   1   11.89    6.61
   4   1  -1   13.79    5.37
  -5   1   1    4.91    5.41
   5  -4  -1   28.43    7.24
   4   1  -1   11.85    5.47
  -5   1   1   16.38    8.35
   5  -1   1   18.65    8.03
  -4  -1  -1   17.45    5.91
   5  -1   1   16.67    7.42
  -5   1   1   17.59    9.07
  -5   4  -1    4.68    6.53
   1   4   1   13.44    4.49
   4   1  -1    7.69    5.19
  -4  -1  -1   18.97   10.17
   5  -4  -1    5.68    4.90
  -1  -4   1    4.41    5.58
  -4  -1  -1   12.28    6.65
  -4   5   1   14.04    7.83
   4  -5   1   21.51    7.65
   1  -5  -1    8.07    4.84
  -1   5  -1   16.16    5.46
   1  -5  -1    3.87    6.68
  -5   4   1   16.13    5.10
   1  -5   1   15.95    5.17
   4  -5  -1   11.19    4.94
   4   1   1   -0.10    7.56
  -5   1  -1   12.69    7.97
  -1  -4  -1   18.98    6.80
   5  -4   1    9.50    7.48
  -4   5  -1   12.62    3.73
  -4  -1   1   18.55    5.95
  -1  -4  -1    9.10    5.39
   5  -1  -1   13.77    5.65
  -5   1  -1   11.15    4.86
  -5   1  -1   13.88    7.88
   4   1   1   14.50    9.83
  -1   5   1    6.03    4.96
   4   1   1    2.40    4.61
  -5   4   1   -6.28    5.40
   5  -1  -1   22.74    9.24
  -4   5  -1   10.12    4.03
   1   4  -1    9.25    5.69
   1   4  -1    1.98    4.30
   4  -5  -1   21.88    7.33
  -5   4   1   20.91    6.11
   5  -4   1    2.22    4.67
   5  -4   1   27.96    6.68
   5  -1  -1   14.81    6.35
  -4  -1   1    4.98    5.41
   4   1   1    3.23    3.88
   4   1   1   14.11    6.01
  -5   4   1   30.36   11.69
   5  -1  -1    1.21    5.60
   1  -5   1    8.69    4.73
  -5   1  -1    6.06    8.03
   5  -1  -1   19.18    8.60
   4  -5  -1   14.29    8.04
  -4  -1   1    7.13    5.79
   1   4  -1    4.36    6.79
   5  -4   1   -3.05    9.44
  -4  -1   1   16.51    7.98
  -1  -4  -1   21.63    6.01
   1  -5   1   17.31    8.59
   4  -5  -1   16.38   10.62
  -1   5   1   22.40    8.24
   1  -5   1   13.63    4.89
  -1  -4  -1   13.38    7.73
  -4   5  -1    9.16    7.91
   5  -1  -1   10.44    8.38
  -5   1  -1   24.56    6.12
   4   1   1    8.46    6.46
   1  -5   1   16.30    4.61
  -4  -1   1    2.17    7.38
   4  -5  -1   20.76    4.67
   5  -4   1    1.61    9.93
   1   4  -1    8.50    7.75
  -1  -4  -1   11.09    5.84
  -4   5  -1    6.68    8.35
  -5   1  -1   12.63    5.57
   5  -5   1  803.02   37.20
  -5   0   1  815.14   30.34
   5   0  -1  764.86   32.96
   0  -5   1  787.66   30.07
   5   0  -1  773.29   29.20
   0  -5  -1  793.81   27.19
   0   5  -1  781.60   28.73
   5  -5  -1  772.97   28.93
  -5   5   1  787.69   30.90
  -5   0   1  789.95   35.09
   0  -5  -1  771.66   25.88
   5  -5   1  798.00   35.12
   5   0   1  829.62   30.53
   5  -5   1  787.10   30.95
  -5   0  -1  813.63   30.35
  -5   0  -1  776.01   29.47
   0  -5  -1  766.12   32.53
   5   0   1  791.17   30.62
   0   5   1  778.89   29.04
   0  -5   1  797.67   29.18
   0   5   1  801.48   26.73
   0   5   1  747.83   28.07
  -5   0   1  778.07   30.14
  -5   5  -1  808.70   31.27
   5  -5  -1  834.36   35.94
   0   5   1  763.12   32.06
   0   5  -1  777.33   32.78
   5   0   1  733.64   32.25
  -5   5   1  827.22   26.78
   5  -5  -1  742.28   37.07
   5   0   1  718.79   34.75
   5   0   1  777.67   29.56
   0   5  -1  821.55   27.45
  -5   0  -1  769.12   32.11
   5   0  -1  801.38   31.49
   5   0   1  801.06   30.46
  -5   0  -1  778.71   33.46
  -5   0   1  833.78   33.69
   0  -5   1  764.51   33.25
   5  -5   1  735.75   27.87
   0  -5  -1  752.79   29.53
   0   5  -1  812.56   29.98
  -5   5  -1  763.26   27.69
  -5   5  -1  750.00   35.07
   5  -5  -1  748.65   30.37
  -5   0   1  773.55   29.17
  -5   0  -1  784.55   34.74
  -5   5  -1  749.89   28.13
   5   0  -1  761.98   30.06
   0  -5  -1  767.67   29.33
   5   0  -1  826.13   35.87
  -5   0  -1  758.51   29.78
  -3  -3  -1   -5.71    5.53
   3   3  -1   -3.58    9.08
   3  -6   1    5.54    7.36
   3   3  -1    5.60    5.24
  -6   3  -1   -1.98    8.20
   3  -6   1   -0.03    4.36
   6  -3   1    1.12    5.96
  -6   3   1    7.06    7.82
  -6   3  -1    4.87    5.92
  -6   3  -1   -3.39    4.66
   3   3  -1    2.80    2.56
   3   3   1    0.75    3.06
  -3  -3   1   -5.55    8.64
  -6   3   1  -13.58    4.74
   3   3   1    0.76    5.92
  -3  -3  -1    1.56    4.92
  -3  -3  -1    6.01    6.22
   3  -6  -1    7.05    5.35
   3   3   1   -1.36    5.74
  -3  -3  -1    0.13    4.79
   6  -3   1    6.83    9.60
  -3  -3   1    0.47    6.06
   3  -6  -1   -2.22    6.99
   3   3  -1    7.11    8.47
   6  -3  -1   -1.49    8.33
   6  -3   1    3.54    8.96
  -3  -3   1    1.48    4.53
   3  -6   1   -0.23    7.30
   6  -3  -1   -5.49    4.76
  -6   3  -1    4.77    7.52
   3  -6   1   -1.78    3.71
   3   3   1   -6.55    4.64
   3  -6  -1    2.55    9.00
  -3  -3   1    2.56    5.92
   6  -3   1   -4.70    4.38
   6  -3   1    5.03    5.65
   6  -3  -1   -4.33    7.15
  -6   3   1    2.31    5.86
   6  -3   1    9.22    6.09
   6  -3  -1    5.94    5.67
  -6   3  -1    3.47    9.90
   6  -3  -1   -5.84   10.51
   3   3   1   -1.12    7.00
  -3  -3  -1   -5.18    7.91
  -3  -3  -1   -1.85    7.78
   3   3   1  -15.58    7.41
   6  -3  -1   -2.18    6.04
  -6   3   1    8.48   10.34
   3   3  -1    3.10    5.29
   3  -6  -1   -7.00    6.92
   2  -6  -1    3.25    5.73
   2  -6  -1    8.66    6.61
   6  -2   1   -2.96    7.80
   6  -4  -1   27.71   10.64
  -6   2   1    0.57    5.74
  -4  -2  -1    1.35    8.87
  -2   6  -1    8.20    4.52
  -2   6  -1   12.29    3.93
  -4  -2  -1    1.08    5.61
   2   4   1    3.67    5.91
   6  -2   1    1.92    5.61
   2  -6  -1    7.91    9.07
   4   2  -1   17.48   11.22
   4   2  -1    3.88    9.80
  -2  -4   1    3.98    5.78
  -2  -4   1    4.29    6.25
   4  -6   1    8.92    4.53
  -6   2   1   11.51    8.39
  -4  -2  -1    9.48    7.25
   6  -4  -1   12.39   10.78
   2   4   1   -0.02    6.91
   4  -6   1   10.29    7.98
   6  -2   1    8.16    6.06
   4  -6   1    9.05   10.34
   6  -2   1    2.96    7.90
   4   2  -1   -1.16    4.79
   4  -6   1    3.30    4.24
   2  -6  -1    8.26    5.33
   2   4   1    2.04    4.94
  -6   4  -1    5.48    8.23
   2  -6  -1    5.59    3.83
  -4  -2  -1    4.94    6.54
  -2  -4   1   11.71    6.96
  -6   4  -1   -2.96    6.16
   4   2  -1    6.44    4.04
   6  -4  -1    8.18    5.57
   6  -2   1    6.04    5.29
   4   2  -1    0.05    6.27
   2  -6  -1    9.04    6.70
   4  -6   1    6.06    3.92
   2   4   1    7.79    7.05
   6  -4  -1    5.59    6.04
  -6   2   1    3.27    4.84
   6  -4  -1    6.17    5.29
   4  -6   1   -7.49    7.80
  -2  -4   1   21.75   10.98
   4   2  -1   12.08    5.76
  -4  -2  -1   15.42    5.87
  -6   2   1   12.15    5.99
   6  -2   1    2.73    9.64
  -4  -2  -1    4.65    6.46
   6  -4  -1   17.38    6.90
  -6   4  -1    1.98    4.50
   2  -6  -1   -3.69    3.95
  -2  -4   1    4.49    5.30
   6  -4   1   -7.86    9.31
   2   4  -1    0.04    5.45
  -4  -2   1    2.72    5.22
   2  -6   1   10.99    4.98
  -2  -4  -1    2.74    5.92
   2   4  -1   12.33    6.15
   4   2   1   12.77    4.24
   2   4  -1    6.85    4.50
   6  -4   1    0.65    5.80
   6  -4   1   -4.19   10.16
  -6   2  -1   10.95    5.47
   2  -6   1    7.09    7.27
   6  -2  -1   11.65    6.32
  -6   4   1    9.68   10.60
   6  -4   1    6.48    5.79
  -4  -2   1    4.78    8.10
  -4  -2   1    3.84    5.98
  -6   2  -1   14.30    8.69
   2  -6   1   -0.29    8.78
   4  -6  -1    4.80    4.25
  -6   4   1    5.28    5.82
  -6   2  -1    6.97    8.87
  -6   2  -1    8.87    8.57
   6  -2  -1   -4.50    7.74
  -4  -2   1   -0.03    9.04
   2  -6   1   12.81    4.48
  -4   6  -1   -1.88    7.64
  -2   6   1   -2.55    4.89
   4  -6  -1    6.00    4.89
  -2  -4  -1    2.81    6.07
   4  -6  -1    7.53    7.14
   4   2   1   15.73    6.56
   6  -4   1    4.09    5.49
   4   2   1   27.47   11.14
   6  -4   1    0.21    6.14
  -2  -4  -1   21.89   10.30
   4   2   1    4.36    4.90
   4  -6  -1    6.45    4.84
  -2  -4  -1    2.80    7.40
  -6   4   1    1.90    5.08
   2   4  -1   13.06    8.00
   6  -2  -1    4.42    5.22
   2  -6   1   10.61    5.10
  -2  -4  -1    3.50    6.54
   6  -2  -1   13.55    9.57
   4  -6  -1   -0.62    7.35
  -6   4   1    6.03    6.45
   6  -2  -1    1.75    6.27
   4   2   1    7.87    5.96
   4   2   1   11.92    9.16
   6  -2  -1    5.39    8.32
   2  -6   1    9.14    5.86
   6  -5  -1   32.93    6.31
  -6   1   1   35.74    5.84
  -6   5  -1   19.16   10.09
  -1  -5   1   36.30    7.22
  -1   6  -1   43.15    6.07
   5   1  -1   27.17    6.17
   6  -1   1   26.91    6.56
  -5   6   1   34.26    8.39
  -6   5  -1   31.60    7.35
   1  -6  -1   34.82    8.08
  -1  -5   1   28.57    6.20
   1  -6  -1   36.76    9.97
  -1   6  -1   29.33    9.92
   1   5   1   43.96    7.64
   6  -1   1   27.98    6.54
  -1  -5   1   28.09    7.49
   5  -6   1   39.20    6.09
   5   1  -1   32.87    7.29
   6  -1   1   36.42    9.08
   1  -6  -1   32.61    5.87
  -6   5  -1   40.55    8.89
   6  -5  -1   17.85    6.24
  -1  -5   1   31.00    6.75
   1   5   1   35.28    5.07
  -5  -1  -1   37.25    9.15
   6  -1   1   38.84    7.96
   6  -5  -1   35.26    7.64
   1  -6  -1   32.74    6.24
   5  -6   1   37.99   18.50
  -6   1   1   49.86   11.69
  -6   1   1   46.70   12.89
   5  -6   1   31.45   12.69
  -6   5  -1   27.92    5.66
   5   1  -1   44.23   11.46
   5   1  -1   30.04    6.48
   5  -6   1   31.31    8.93
   6  -1   1   30.38    9.91
  -1   6  -1   38.81    4.51
   5   1  -1   30.35    7.37
   1   5   1   41.61    8.93
   6  -1   1   50.70    9.48
   1   5   1   42.83    8.88
  -6   1   1   41.78    7.40
   5  -6   1   34.93    5.61
  -5  -1  -1   54.86   11.84
   6  -5  -1   34.04    7.52
   1  -6  -1   41.44    7.25
   6  -5  -1   14.51    9.97
   1  -6  -1   34.16    5.68
  -5  -1  -1   41.95    7.81
   6  -5  -1   46.07   13.12
  -5  -1  -1   38.73    7.79
  -5  -1  -1   35.33    7.37
   1  -6  -1   32.86    5.04
  -1   6  -1   35.12    6.09
   5   1  -1   51.19   11.56
  -5  -1  -1   37.69    9.42
  -1  -5   1   42.87   10.80
   1   5  -1   26.21    6.45
  -6   1  -1   34.12    6.80
   1   5  -1   45.38    6.16
  -6   1  -1   52.73   10.82
  -6   5   1   35.99    6.29
   5   1   1   37.74   11.12
  -1  -5  -1   40.52    7.17
   6  -1  -1   26.64    6.69
   5  -6  -1   35.62    6.10
   5   1   1   17.96    9.69
  -5   6  -1   54.10   10.11
   1  -6   1   34.41    5.02
  -5  -1   1   33.28    6.75
   6  -1  -1   37.27   11.20
   1  -6   1   28.08    6.13
   5   1   1   35.44    8.63
  -1  -5  -1   51.11    8.60
   6  -1  -1   39.82    6.64
  -1   6   1   30.67    9.43
  -1  -5  -1   35.63    7.42
   6  -5   1   26.31   12.36
   1   5  -1   35.82    8.45
   5   1   1   31.38    7.00
   5   1   1   34.91    6.23
   6  -5   1   34.03   10.90
  -6   1  -1   34.54    7.05
  -6   5   1   38.52    6.67
  -5  -1   1   32.50   11.19
   5  -6  -1   40.31    5.69
   5   1   1   29.36    6.62
  -6   1  -1   42.74    7.92
   6  -1  -1   36.46   10.23
   6  -5   1   41.53    8.56
   5  -6  -1   48.20   12.73
  -1  -5  -1   20.86    9.30
   1  -6   1   34.70    4.98
  -5  -1   1   32.01    9.32
   1  -6   1   44.06    9.28
   1  -6   1   32.58    6.10
  -5  -1   1   24.32    6.85
   1  -6   1   39.42    6.62
   6  -5   1   34.26    6.60
  -5   6  -1   34.90    4.64
   5  -6  -1   44.30   13.82
  -1   6   1   35.84    6.57
  -1  -5  -1   39.76    7.11
   6  -1  -1   47.62    8.28
  -6   1  -1   43.76   11.08
  -5   6  -1   34.06    4.15
   6  -5   1   60.32    8.41
  -6   1  -1   45.43   10.39
  -5  -1   1   48.14    7.95
   1   5  -1   25.92    8.40
   1  -6   1   22.67   11.99
   5  -6  -1   53.64    8.92
   6  -1  -1   47.51   10.26
   6   0   1   85.66    9.99
   0  -6   1   64.62    7.62
   6  -6   1   84.02    7.72
   6  -6  -1   69.00    8.20
   0   6  -1  100.09    9.67
   0  -6   1   76.99    8.75
   6  -6   1   82.75    9.16
   0   6   1   77.82    7.48
  -6   0   1   69.81    9.23
   6  -6  -1   71.41   10.04
  -6   0  -1   62.83    8.98
  -6   0  -1   72.70   12.96
   6   0   1   63.61    9.55
   0  -6  -1   90.43    9.54
   6   0   1   79.36    9.27
   0   6  -1   66.13   11.36
  -6   0   1   60.40    7.67
   0  -6  -1   73.08    7.96
   6   0  -1   58.10    9.34
   6  -6  -1   79.20   14.84
  -6   0  -1   90.84   12.47
   0  -6   1   79.14   10.54
   0   6  -1   74.95    8.23
   0  -6   1   69.52   12.68
  -6   0  -1   94.64   13.29
  -6   0   1   71.78    8.50
  -6   6  -1   96.42   10.75
   0  -6  -1   70.94    9.61
   6   0   1   71.75   12.75
   6  -6   1   88.42   13.48
  -6   0  -1   75.66    9.29
   0   6   1   81.62    6.83
   6  -6   1   69.39   10.02
   0   6  -1   83.33    7.53
   6  -6  -1   63.96   12.32
   6   0  -1   79.45   10.20
   0  -6  -1   72.99   11.98
   6  -6  -1   79.12    8.52
   6   0  -1   63.63    8.65
  -6   0   1   80.11   12.21
   0  -6  -1   74.45    8.79
  -6   6  -1   93.55    7.90
   0  -6  -1   83.97    7.24
  -6   0   1   59.75   11.34
  -6   6   1   93.13   10.95
  -6   0  -1   53.10    8.40
   6   0  -1   64.56   13.67
   6   0   1   53.61    7.23
   6   0  -1   78.67   13.39
   0   6   1   79.82   12.16
   6  -6   1   91.82   16.30
   0  -6   1   80.01    9.88
   6   0   1   73.78   12.20
  -6   6  -1   88.04   13.01
   6   0  -1   79.20    8.78
   0  -6  -1   81.64    6.91
   3   4   1  138.71   11.24
  -3  -4   1   91.31   12.09
   7  -3   1  115.25   15.43
   3  -7  -1  123.87    8.41
   7  -4  -1  138.93   17.81
  -7   4  -1  143.40   17.78
   3  -7  -1  117.40   16.12
   7  -4  -1  131.21   10.62
  -7   3   1  108.39   10.08
  -7   4  -1  126.46   12.69
  -7   3   1  116.31   15.71
   3  -7  -1  132.48    8.96
   7  -4  -1   97.79   16.11
  -7   3   1  119.83   13.32
   3   4   1  143.04   13.38
   4   3  -1  118.02   14.59
  -3  -4   1  142.82   12.03
  -7   4  -1  103.05   14.63
   3  -7  -1  116.18   11.87
  -7   3   1  133.22   10.91
   7  -4  -1  125.30   11.39
  -3  -4   1   92.58    9.25
  -7   4  -1  108.57    9.37
   7  -3   1  123.64   13.87
   3   4   1  118.44    6.30
   7  -3   1  111.50   10.77
   4   3  -1  133.07    8.09
   3   4   1  123.35   14.68
   4  -7   1  124.41    9.70
   4  -7   1  116.24   12.21
   4   3  -1   94.98    8.88
   4  -7   1  120.59    9.62
  -4  -3  -1  123.60   12.30
  -4  -3  -1  121.93   14.92
   4  -7   1  127.79   17.82
   7  -3   1  118.35   10.71
   4   3  -1  105.97   10.46
  -4  -3  -1  145.03   12.94
   4   3  -1  111.34   16.70
   3  -7  -1   87.19   10.95
  -4  -3  -1  100.18   10.34
  -4  -3  -1  121.97   11.56
   7  -3   1  142.97   16.24
   4  -7   1  116.70   13.01
   7  -3   1  137.84   12.68
  -4  -3  -1  149.17   16.20
  -3  -4   1  110.37   10.93
  -3  -4   1  104.80   14.70
   3  -7  -1  129.55   11.36
   7  -4  -1   96.39   12.01
   3   4   1  125.22   11.23
   4  -7   1  124.59    9.54
   4   3  -1   98.52   10.09
  -7   4  -1  150.03   12.12
  -3  -4  -1  103.17   11.15
   4   3   1  145.42   16.17
   4   3   1  104.62   10.63
   4  -7  -1  134.21   10.95
  -3  -4  -1  128.03   22.93
  -7   3  -1  143.18   14.43
  -7   3  -1  136.13   16.62
  -7   4   1  148.96   12.91
  -7   3  -1  115.22   10.06
   3   4  -1  147.54   11.92
   4   3   1  138.85   15.92
  -3  -4  -1  127.19   14.33
   3   4  -1  126.17   14.72
   7  -3  -1  144.16   16.23
   4   3   1  127.82    8.46
   7  -3  -1  114.86   10.08
   3   4  -1  100.79   13.02
  -3  -4  -1  141.24   12.28
   7  -4   1  136.48   12.35
  -4  -3   1  106.94   10.61
  -7   3  -1  147.41   17.54
   7  -3  -1  118.94   16.17
  -7   4   1  101.09   14.95
   3   4  -1  129.42   11.29
   3  -7   1  113.34   16.97
   4   3   1  134.45   11.61
   3  -7   1  141.39    9.75
  -7   3  -1  125.43   10.70
   7  -3  -1  137.67   14.23
   3  -7   1  120.43   12.56
  -7   4   1  119.82   10.67
   4  -7  -1  109.35   12.48
   7  -4   1  123.92   10.80
   3   4  -1  144.79   12.55
   3  -7   1  130.19   10.41
   4  -7  -1  121.39    8.34
   3  -7   1  139.27   11.96
  -7   4   1  134.60   11.69
   4  -7  -1  111.51   17.51
   4  -7  -1  122.66   12.76
   7  -4   1  128.70   16.11
   4   3   1  124.43   10.72
  -4  -3   1  100.70   13.82
   7  -4   1  136.83   16.60
   7  -4   1   87.06   10.74
   7  -4   1  123.25   11.01
  -4  -3   1  132.32   11.66
   7  -3  -1  123.93   11.75
  -4  -3   1  110.22   16.69
  -3  -4  -1  118.56   11.31
   7  -3  -1   96.88   10.37
  -5  -2  -1   19.72    7.24
   2   5   1    7.88    7.09
   7  -5  -1   20.49    8.10
   2   5   1   25.49    7.31
   7  -2   1   13.75    9.29
   5  -7   1   24.23   12.34
   5   2  -1   10.96    7.90
  -5  -2  -1   17.96   10.82
   7  -5  -1   18.39    6.34
   2   5   1   14.31    5.70
   7  -2   1   11.10   10.55
   7  -2   1   28.52    7.87
  -2   7  -1   21.03    5.41
   5  -7   1   19.96   10.31
   7  -5  -1   13.45    7.24
   7  -2   1   26.37   10.74
   5   2  -1   14.64    6.90
   2   5   1   18.78    8.23
  -2  -5   1   24.58    7.10
  -7   5  -1   12.37    7.23
   2   5   1   13.54   11.67
  -7   5  -1   19.83   10.62
   7  -5  -1   14.72   15.12
   7  -2   1   15.56    7.23
  -7   2   1   20.48    7.16
   2  -7  -1   11.91    6.68
   2  -7  -1   24.63    6.28
   5   2  -1   47.36   14.19
   7  -5  -1   16.88    7.18
   5  -7   1   26.93    9.87
   7  -2   1   15.51    6.69
  -7   5  -1   23.18    5.99
  -2  -5   1   25.08   14.69
  -2  -5   1   17.21    7.49
   5  -7   1   10.31    4.85
   5  -7   1   19.74    5.18
  -5  -2  -1   17.09    9.10
   2  -7  -1   19.67    5.53
   2  -7  -1   16.56   10.52
   2  -7  -1   25.41    8.81
   5   2  -1   26.32    5.30
   5   2  -1   27.29    7.35
  -2  -5   1   24.04    6.89
  -5  -2  -1   23.62    8.37
   5   2  -1   24.71   12.55
   2  -7  -1   20.85    5.08
  -5  -2  -1   15.46    8.51
  -2  -5   1    3.05    7.01
   7  -5  -1   17.28   12.47
   2  -7  -1   26.13    6.94
  -7   2   1    1.73    9.58
   5  -7   1   20.40    4.93
  -7   2   1   15.97   10.27
  -7   2   1   23.80    7.08
  -7   2   1   23.31    6.62
  -5  -2  -1   20.37    7.80
  -7   5  -1   19.13    7.64
  -2  -5  -1    6.64    8.37
   7  -5   1   12.60    8.14
   2  -7   1   30.38    6.66
   7  -2  -1   18.08    7.06
  -7   5   1   19.49    7.21
   2  -7   1   24.52    6.16
   5   2   1   19.59    6.65
   7  -2  -1   20.05    7.30
   7  -5   1   17.17    6.35
  -2  -5  -1   39.52   12.56
  -7   5   1   26.55    8.00
   2  -7   1   23.14   11.48
   5   2   1    9.75    7.63
   7  -2  -1   22.21   10.41
   5  -7  -1   14.59    9.44
  -5  -2   1   21.94    7.62
   2   5  -1   19.23   10.44
  -7   2  -1   24.63   10.99
   7  -2  -1   22.30   10.79
   7  -2  -1   25.42   11.44
  -2  -5  -1   18.73    6.30
  -2  -5  -1    3.20    6.87
  -2   7   1   23.33    6.18
   5   2   1    9.07   10.91
   2  -7   1   18.89    6.31
  -7   2  -1   22.89   10.81
   5  -7  -1   18.16    4.75
   5  -7  -1   15.60   13.77
   5  -7  -1   19.14    8.00
   2  -7   1   24.26    6.18
   7  -5   1   32.13    7.17
   7  -5   1   18.78    7.81
   5  -7  -1    7.69    5.32
   2   5  -1   21.22    8.88
   5   2   1   16.69    7.99
   2   5  -1   29.82    8.97
   5  -7  -1   20.58    5.71
   7  -2  -1   19.50    8.33
   5   2   1   19.63    5.30
   2   5  -1   23.12    6.95
  -7   5   1   15.27    6.12
  -5  -2   1   25.77   10.84
  -5  -2   1    1.07    7.95
  -5  -2   1   13.81    9.17
  -5   7  -1   17.63    8.62
   2  -7   1   14.83    8.88
  -2  -5  -1   13.89    7.04
   5   2   1   42.13   13.22
  -7   2  -1   16.12    7.26
  -7   2  -1   21.77    6.65
  -7   2  -1    7.84   10.27
  -5  -2   1   12.22    7.61
   7  -5   1   25.00   12.33
  -7   1   1   10.51    9.88
  -1  -6   1   19.22    7.45
   1  -7  -1    9.67    6.75
  -7   6  -1   24.21    6.78
   7  -6  -1   10.75   13.56
  -7   6  -1   12.03    5.71
  -6  -1  -1    8.48    7.13
   1  -7  -1   25.77   10.93
   6   1  -1   19.36   11.39
  -6  -1  -1   13.27   10.99
   6   1  -1   18.30    8.00
  -7   1   1   23.27   10.53
  -7   1   1   33.94    7.43
   1  -7  -1   12.41    5.87
   7  -1   1   11.62    7.54
   1   6   1   20.53    8.94
  -1   7  -1   10.99    5.45
   6   1  -1   22.36    6.63
  -1   7  -1   20.03   10.53
  -1  -6   1   26.62   11.86
   1  -7  -1   30.91    6.29
   7  -6  -1   10.74    6.08
  -6  -1  -1   36.05   14.82
  -1  -6   1   11.46    7.43
   7  -6  -1   21.56   12.00
  -1  -6   1   19.17    7.16
  -7   1   1   22.10    7.43
  -1  -6   1   13.12    6.04
   7  -1   1    8.63    8.52
  -6  -1  -1   17.91    9.82
   1  -7  -1   16.29    4.47
   1   6   1   10.53    4.83
   1   6   1   10.81    6.44
   1  -7  -1   19.02    8.02
   7  -6  -1   28.02    7.55
   6  -7   1   11.20   11.53
   6  -7   1   10.56    5.89
   7  -6  -1   19.82    7.01
  -6  -1  -1   25.33    7.76
   6   1  -1   21.21    6.78
  -7   6  -1   19.96   11.13
   6  -7   1   23.72   10.45
   7  -1   1   25.44    8.45
   6   1  -1   41.32   12.84
  -1   7  -1   16.41    5.88
  -7   6  -1   12.40    8.81
  -6  -1  -1   17.97    9.69
   6   1  -1   22.88    8.40
   6  -7   1   23.31    5.69
   6  -7   1    7.21    8.83
  -1   7  -1   13.11    4.12
  -6   7   1   17.60    9.26
   1   6   1   15.76    7.04
   1  -7  -1   18.72    5.78
   7  -1   1   23.11   10.08
  -7   1   1   15.98    6.22
   7  -1   1   19.86    7.90
   7  -6  -1   16.10    7.31
   6   1   1   11.07    6.00
   6   1   1   11.74   10.94
   7  -1  -1   21.90   11.14
   7  -1  -1   11.54    7.85
  -7   1  -1   13.07    7.83
   1  -7   1   23.47    6.75
   1   6  -1   16.44    6.90
   1   6  -1   19.11    5.19
  -7   6   1   24.20    8.52
  -7   1  -1   19.73    7.59
   6   1   1   23.33   12.44
   7  -6   1   12.76    6.22
  -1  -6  -1   15.21    7.52
   7  -1  -1   15.37   13.20
  -1  -6  -1   19.28    6.37
   1  -7   1   17.70    4.29
   6  -7  -1   18.74    5.18
   7  -6   1   33.14   13.52
   6   1   1   17.17    7.58
   1   6  -1   26.89    7.92
   1  -7   1   14.19    7.96
   1  -7   1   13.74   11.14
  -6  -1   1   19.15    7.47
  -6  -1   1   27.74   10.09
   1  -7   1   19.96    6.21
  -7   1  -1   13.67    7.63
  -6   7  -1   22.03    9.15
   7  -1  -1   16.17    6.97
   6  -7  -1    5.62   11.29
   7  -1  -1   27.87    8.36
   6   1   1   30.54    8.61
   7  -6   1   19.54    6.45
  -1  -6  -1   14.56    7.33
   7  -1  -1   24.77    9.49
   1  -7   1   14.85    6.65
  -6  -1   1   17.41    7.26
  -7   1  -1   14.77   10.87
  -7   1  -1   12.52   10.38
   6   1   1   16.13    6.40
   1  -7   1   14.49    4.20
   6  -7  -1   18.16    9.05
   6  -7  -1   17.07    5.77
   7  -6   1   11.49   10.90
  -6  -1   1   13.43   11.98
   6  -7  -1   29.04   10.87
  -7   6   1   34.02    6.82
  -1   7   1   21.80    9.80
  -7   1  -1   18.48   10.45
  -1  -6  -1    9.58    6.30
   1   6  -1   21.16    9.21
  -7   6   1    7.63    5.43
  -6  -1   1   11.79    7.12
   7  -6   1   18.95    7.28
  -7   7  -1   58.36   11.13
   7   0   1   93.09   16.34
   7   0  -1   64.57    9.66
  -7   0  -1   65.94   13.20
   7  -7   1   73.87   11.46
   7  -7   1   74.69    8.12
   7  -7  -1   84.10   13.90
   0  -7   1   70.05    9.41
   7  -7   1   69.52   13.75
  -7   0   1   67.43   10.11
   0   7   1   74.03    6.26
   0  -7   1   88.50   10.07
   7   0  -1   64.18   10.19
  -7   0  -1   76.86   14.52
   0  -7  -1   89.23    9.71
  -7   0   1   60.47    8.94
  -7   0  -1   80.73   11.12
   0  -7  -1   78.01   13.69
   7   0   1   60.72   10.30
   7   0   1  103.14   11.81
  -7   0  -1   74.46   12.81
   7  -7  -1   81.11   16.64
  -7   0  -1   59.61    9.27
   7  -7  -1   62.56    7.78
  -7   0   1   61.42   13.89
   7  -7  -1   67.68    8.42
   0   7   1   74.22    7.61
   0  -7   1   71.37   11.44
   7   0  -1   56.04    9.80
   0  -7  -1   72.53   11.32
   7   0   1   80.60   14.35
   0  -7   1   72.31    8.97
   0   7  -1   71.48    6.74
   0  -7  -1   71.56   10.14
   7  -7  -1   73.70    8.38
   0   7  -1   79.84    9.20
  -7   0  -1   75.03    9.52
   0   7   1   81.10   13.29
   7  -7   1   96.24   18.01
   7  -7   1   97.98    9.77
   7   0  -1   65.98   14.32
   0  -7   1   71.31   13.96
   7   0   1   67.46   10.10
   0  -7  -1   78.43    9.33
  -7   7   1   84.24   11.45
  -7   0   1   75.05   13.01
  -7   0   1   96.17   11.29
   7   0   1   51.39    9.17
   0   7  -1   63.90   12.45
   7   0  -1   70.94   16.63
   7  -7  -1   62.44    9.83
   0   7   1   81.11    9.17
   7   0  -1   74.55   10.06
  -7   7  -1   89.94    7.62
   0   7  -1   86.07    9.24
   4   4  -1   -3.80    7.16
   8  -4   1   -2.72   11.52
   4   4   1    6.63    3.65
   8  -4   1    1.35    7.43
  -8   4   1   -1.84    6.22
   4   4   1    9.82    7.58
  -4  -4  -1    7.80    6.70
   4  -8   1   -3.20    8.49
  -8   4   1   -0.36    6.28
  -8   4   1   -3.48   11.72
   4   4   1   -0.58    7.60
   8  -4   1    5.01    6.62
   4   4  -1  -11.26    9.53
   4  -8   1   14.17    8.60
  -8   4   1  -14.13    7.41
  -8   4  -1   -0.46   10.84
   4  -8  -1   -8.62    5.52
   4   4  -1    3.89    7.13
   8  -4  -1    7.27   10.49
   4  -8  -1   -0.06   12.08
  -4  -4  -1   -1.19    6.89
   8  -4   1    5.22    7.05
  -4  -4   1   -3.35    7.28
   8  -4  -1   -2.11    8.13
  -8   4  -1   -1.32   11.90
   8  -4  -1   -2.54    7.55
   4   4  -1    2.82    9.53
   4  -8   1    4.69    5.24
   4   4   1    3.12    8.92
  -4  -4   1    7.06    7.66
  -4  -4   1    0.86    7.44
   4  -8   1   -0.91   12.72
   8  -4  -1   10.05   11.68
   4  -8  -1   -1.85    8.18
  -8   4  -1    3.36    6.20
  -4  -4  -1    3.33    8.67
  -8   4  -1    7.13    6.98
   4  -8   1   -1.12    4.33
  -4  -4  -1    7.39   10.57
   4   4   1   -5.69    5.44
   4  -8  -1    2.14    4.18
  -4  -4   1   -1.41   10.10
   4  -8  -1    4.45    9.56
   4   4  -1    1.76    5.55
   4   4  -1   -1.88    2.66
   8  -4   1  -12.33   10.33
   8  -4  -1    6.02    6.01
   4   4   1  -10.77    8.30
   8  -4   1   -8.79    7.41
  -8   4  -1   -1.31    9.05
  -4  -4   1   -5.47    9.20
  -4  -4  -1    2.62    7.92
  -8   3   1    8.46    9.23
  -3  -5   1   16.58    7.81
  -8   5  -1   19.19    6.71
  -5  -3  -1   11.43    8.28
   3  -8  -1   23.21    5.49
   5  -8   1   18.23    5.55
  -3  -5   1    8.28    7.90
  -8   5  -1    5.33    7.37
  -3  -5   1   19.69   12.67
   8  -5  -1    8.27    7.53
  -8   3   1   26.47   12.52
   5   3  -1   23.98    4.83
  -8   3   1    4.84    7.21
   5  -8   1   13.52    8.76
   5   3  -1    3.82    7.79
   5   3  -1   32.43   13.22
   3  -8  -1   25.08    7.19
   8  -3   1   14.24    7.57
   3   5   1   15.09    6.31
   5  -8   1   19.77   13.95
   3  -8  -1   32.93    9.32
   5   3  -1   11.96   12.49
   8  -3   1    9.22   11.45
   8  -5  -1   19.95   14.00
   5  -8   1   13.33    5.37
  -8   3   1   10.34    6.71
   3  -8  -1   14.23    7.73
  -5  -3  -1    3.54    7.38
   5   3  -1    7.68    7.56
   3   5   1   12.61    9.00
   3  -8  -1   16.77   12.77
  -8   5  -1   17.85   11.08
   3  -8  -1   17.59    7.37
   5  -8   1   14.64    5.19
  -5  -3  -1   34.22   12.11
  -5  -3  -1   15.91    7.95
  -5  -3  -1    9.40    9.45
   8  -5  -1   13.42    7.53
   3   5   1   14.03    7.89
   3   5   1   43.09    8.99
   8  -5  -1   14.97    9.02
   3  -8  -1   27.39    5.58
  -3  -5   1   12.82    7.77
   8  -5  -1    1.78   12.55
   5  -8   1   11.08    9.34
  -8   5  -1   18.01    8.61
   3   5   1   22.42    9.58
  -3  -5   1   14.12    8.25
   8  -5  -1   21.73    7.13
   8  -3   1   15.71   11.33
   8  -3   1   17.99    7.78
   8  -3   1   18.39    8.61
   8  -3   1   12.79    8.39
   8  -5   1   18.73    7.66
  -3  -5  -1   13.82    8.05
   3  -8   1   12.95    9.37
   3   5  -1   17.60    6.02
   8  -5   1   18.44    7.89
  -5  -3   1   14.54    9.89
   8  -3  -1   32.01   10.85
  -3  -5  -1   16.63   11.91
  -5  -3   1   12.12    7.93
   8  -3  -1   10.11   11.99
  -5  -3   1   18.55    8.26
   5  -8  -1    9.39    5.51
   3  -8   1   23.45    5.90
  -8   3  -1   16.70    8.19
   8  -5   1   15.96   12.34
  -3  -5  -1   18.09    8.10
   5  -8  -1   23.75    8.72
  -8   3  -1   18.10   10.22
  -8   5   1    7.25    7.29
   3  -8   1   13.19    6.24
   5   3   1   20.98    7.27
   3  -8   1   18.65    7.48
   5   3   1   22.89   10.93
   8  -3  -1    4.93    7.07
   8  -3  -1   22.76    8.64
   5   3   1   26.36   11.44
   8  -5   1   11.71    7.54
  -8   3  -1   19.02   11.57
   3   5  -1   19.51    9.62
  -5  -3   1    6.74   10.40
  -8   5   1   31.99   14.23
   5  -8  -1   25.62    5.03
   5   3   1   23.98    5.07
   5  -8  -1   21.00   11.74
  -8   5   1    9.94    7.54
   5  -8  -1   18.32    5.95
  -5  -3   1   12.96    8.57
  -8   3  -1   19.97   12.91
   3   5  -1   19.35    8.34
  -3  -5  -1    9.01    7.73
   5   3   1   14.03    7.66
   8  -5   1   10.63    6.43
   3  -8   1    6.71   12.37
   8  -5   1   11.71   12.33
   3   5  -1   26.86    8.28
   5   3   1   20.41    8.74
  -3  -5  -1   17.84    9.36
  -8   5   1   20.01    6.64
  -8   3  -1   13.33    7.14
   5  -8  -1   14.11   12.97
   5  -8  -1   20.29    9.93
   8  -3  -1   23.40    9.55
   8  -3  -1   -1.09   10.00
  -6  -2  -1  191.18   19.95
   8  -6  -1  265.15   24.99
   6  -8   1  228.08   12.90
   8  -6  -1  199.46   15.17
   8  -2   1  243.52   20.61
  -6  -2  -1  229.53   16.54
   2  -8  -1  237.28   13.88
   2   6   1  253.37   18.91
   6  -8   1  280.24   24.86
   8  -2   1  221.10   17.82
  -2   8  -1  243.23   14.21
   2  -8  -1  212.13   18.69
   8  -2   1  227.95   16.12
   8  -6  -1  257.53   17.29
   8  -6  -1  214.37   16.70
   8  -6  -1  214.15   16.13
  -2  -6   1  240.22   17.38
   8  -6  -1  215.80   25.05
   6   2  -1  254.73   23.26
  -8   2   1  258.32   16.53
  -2  -6   1  241.25   17.17
   2   6   1  233.44   13.55
  -8   2   1  222.61   15.55
   6   2  -1  222.35   16.26
   6  -8   1  222.17   12.40
   8  -2   1  239.90   17.90
   2   6   1  190.06   16.06
   2  -8  -1  242.83   16.39
   6   2  -1  245.72   14.24
  -6  -2  -1  212.57   16.52
   2  -8  -1  236.58   14.04
  -2  -6   1  256.34   16.97
  -8   6  -1  234.81   16.04
  -6  -2  -1  252.22   19.38
   6  -8   1  234.61   13.23
  -8   2   1  243.21   21.77
   6   2  -1  249.11   17.68
  -6  -2  -1  218.54   16.91
  -8   6  -1  213.49   14.01
   2   6   1  248.98   16.59
  -2  -6   1  215.37   17.36
   6   2  -1  239.26   16.39
   2  -8  -1  224.06   22.83
   2  -8  -1  229.59   13.88
   2  -8  -1  254.77   15.39
   6  -8   1  215.35   20.26
   6  -8   1  259.69   25.74
  -8   2   1  229.69   21.61
  -8   2   1  239.60   15.70
   6  -8   1  218.08   18.03
   2  -8  -1  219.59   17.63
   8  -2   1  207.53   20.12
  -2  -6   1  272.83   26.55
  -8   6  -1  250.98   17.42
   6   2  -1  274.13   26.08
   2   6  -1  246.44   14.02
   2   6  -1  234.36   19.45
   6  -8  -1  230.89   25.17
  -8   6   1  252.36   15.07
   6  -8  -1  233.96   13.96
   6  -8  -1  273.49   18.28
  -2  -6  -1  191.26   16.92
  -8   2  -1  258.38   22.30
   6  -8  -1  223.64   13.54
  -8   6   1  244.66   17.68
  -2  -6  -1  254.53   25.01
   2  -8   1  223.82   18.47
  -6  -2   1  238.17   19.75
   8  -6   1  222.43   16.90
   8  -6   1  246.96   16.32
  -8   2  -1  231.78   16.02
  -8   2  -1  230.52   19.98
   8  -2  -1  224.28   16.15
   6   2   1  235.65   14.13
   6  -8  -1  222.55   21.02
   8  -2  -1  249.35   17.55
   2   6  -1  255.30   16.33
  -8   2  -1  199.42   15.95
  -2  -6  -1  248.37   16.73
   8  -2  -1  285.67   23.02
   8  -6   1  220.49   25.28
   8  -6   1  240.52   17.12
   6   2   1  230.28   17.70
   8  -2  -1  241.27   21.48
  -8   2  -1  189.47   20.21
   2  -8   1  239.43   14.10
   2   6  -1  300.80   19.38
   6   2   1  226.55   16.19
   2  -8   1  200.42   16.89
   8  -6   1  216.57   16.11
   8  -6   1  220.55   22.11
  -6  -2   1  255.71   23.72
   6   2   1  254.22   25.40
  -6   8  -1  218.95   18.71
  -6  -2   1  239.63   16.73
  -6  -2   1  200.35   18.94
   8  -2  -1  235.76   17.92
   2  -8   1  240.44   22.96
  -8   6   1  227.47   15.00
   2  -8   1  233.32   14.03
   8  -2  -1  247.75   22.85
   2  -8   1  208.91   15.04
  -6  -2   1  256.27   17.10
   2  -8   1  226.15   13.87
   6   2   1  171.52   18.99
  -2  -6  -1  223.22   17.25
   2  -8   1  243.97   14.49
  -2   8   1  227.89   14.62
  -2  -6  -1  211.31   16.95
   6   2   1  240.69   16.62
   6  -8  -1  255.94   12.66
   6  -8  -1  258.62   25.16
   7   1  -1  -10.05   11.68
  -1   8  -1    0.60    3.73
   8  -1   1  -12.04    7.13
   7  -8   1   17.32    6.60
   1   7   1    0.45    9.00
  -8   1   1    4.58    7.05
   8  -1   1    1.51    6.97
   7  -8   1   -4.26    8.14
   1  -8  -1    4.18    4.54
   8  -7  -1  -11.18   12.56
   1  -8  -1   11.95    4.34
  -7  -1  -1   13.84    7.89
  -8   7  -1    1.30    5.47
  -7  -1  -1   -5.18    6.68
  -7  -1  -1    7.92    9.72
  -8   7  -1   -8.51    5.66
  -8   7  -1    9.44    8.82
  -1  -7   1   10.77   12.48
  -1   8  -1   -4.41    4.34
   7  -8   1   -8.83    5.03
   7   1  -1    0.75    7.77
   1  -8  -1   -2.69    7.22
   1   7   1    4.76    6.23
   8  -7  -1    2.33   11.79
   1   7   1    9.16    7.36
   1  -8  -1   -0.44    8.74
  -8   1   1    7.15    6.51
  -7   8   1    7.28    9.40
   8  -1   1   15.58    8.65
  -1   8  -1    4.67   10.57
   1   7   1   -1.95    4.27
   7  -8   1   -9.24   12.38
   1  -8  -1    6.08   11.09
   8  -7  -1    4.06    6.47
  -1  -7   1   -4.59    7.30
  -8   1   1    7.25   10.59
  -8   1   1   -1.44   10.45
  -7  -1  -1   -6.51    6.99
   8  -1   1   13.47   11.43
  -1  -7   1   -2.79    7.71
  -1  -7   1   -1.90    6.15
   7  -8   1   -2.67    9.92
   8  -7  -1   -2.86    7.07
   1  -8  -1    7.16    6.02
   7   1  -1    2.39    7.04
   8  -7  -1    3.79    7.73
   7   1  -1    2.24   13.07
   8  -1   1    4.14    8.11
   8  -1   1   -9.49   11.49
  -8   1   1   -5.47    6.84
  -1  -7   1   -4.74    8.37
   7   1  -1  -13.45    7.31
  -7  -1  -1   -0.74   10.88
  -1   8  -1   16.89    6.28
   8  -7  -1   -1.18    6.32
   1  -8  -1   -3.83    6.04
  -8   1  -1  -10.37    6.01
   8  -1  -1   -8.10    7.53
  -1  -7  -1   -4.15    6.37
   8  -1  -1   10.49    7.46
   1  -8   1    1.02    3.41
  -8   1  -1   -1.30    7.52
  -1  -7  -1    2.61    6.53
  -8   7   1    2.68    4.69
  -8   1  -1   19.07   11.95
  -8   1  -1   -7.75   12.04
  -7  -1   1    3.91    7.03
  -7  -1   1    7.53   10.70
   8  -1  -1    5.66   11.19
   7  -8  -1    0.18    8.26
  -7  -1   1   11.88    9.58
   8  -7   1    2.33    6.37
   8  -7   1   -1.01    7.98
   1   7  -1   -2.15    6.38
   7  -8  -1    1.52    5.13
  -7   8  -1    4.65    9.30
   7   1   1    4.07    6.57
   8  -7   1    4.04    6.32
   8  -1  -1    5.11    8.98
   7  -8  -1    4.31    5.54
   1  -8   1   -1.24    3.50
  -8   1  -1   -0.65    7.57
   1  -8   1   -4.64    6.93
   7  -8  -1    0.49   10.18
  -1   8   1   -7.27    6.37
   1   7  -1    8.98    7.27
   1   7  -1   -1.16    8.90
  -7  -1   1    6.52    7.61
   1  -8   1    2.68    9.26
   1  -8   1    1.37   11.56
   1  -8   1    4.04    6.38
   1  -8   1   -1.23    6.30
   8  -7   1   27.58   13.44
   8  -1  -1   -8.51    7.10
  -1  -7  -1    9.27    8.27
   7   1   1   -1.23    7.66
   7   1   1    1.23   11.72
  -8   7   1  -11.52    7.87
   7   1   1   -2.55    6.73
   7  -8  -1    8.52   13.54
   1   7  -1    4.92    4.84
   8  -1  -1   -5.16   10.45
   7   1   1  -14.38    7.73
  -8   7   1    9.81    6.21
  -1  -7  -1    5.58    7.95
   7   1   1    2.00   12.66
  -7  -1   1    0.28    7.35
   8  -7   1    6.94    6.24
  -1  -7  -1   12.81   11.99
  -8   1  -1    1.05   10.79
   8  -7   1    2.04   14.33
   8  -8  -1  156.18   13.18
   8  -8   1  171.35   14.26
   0   8   1  183.97   19.89
  -8   8  -1  171.08   16.53
  -8   0   1  173.21   20.38
   8  -8   1  191.24   16.94
   0   8  -1  173.87   14.03
   8  -8  -1  184.61   15.91
  -8   0   1  173.85   14.83
   8   0  -1  178.69   16.65
   0  -8   1  173.09   15.43
   8  -8  -1  190.43   13.49
   8   0  -1  185.10   15.97
  -8   8   1  187.42   16.38
   8   0   1  138.08   13.16
  -8   0  -1  205.27   16.76
   0  -8  -1  161.39   16.10
   8   0   1  146.75   14.88
   0   8  -1  178.42   12.58
  -8   0   1  195.74   16.48
   8  -8   1  172.99   13.27
  -8   0  -1  178.28   15.55
   8   0   1  171.23   16.39
   0   8   1  169.09   14.60
   8  -8  -1  193.92   19.70
   0   8   1  174.62   10.67
   0  -8   1  184.94   21.00
   8   0  -1  200.83   21.65
   8  -8   1  189.98   23.49
   8   0   1  179.03   16.36
   8   0   1  203.20   21.87
   8   0   1  188.98   27.17
   0  -8  -1  155.16   14.55
  -8   0  -1  182.96   19.02
   8   0  -1  206.21   21.51
   8   0  -1  168.97   17.02
   8  -8   1  170.20   18.42
   0  -8   1  201.58   17.68
   0   8  -1  193.05   20.23
  -8   0  -1  172.44   15.36
   0  -8   1  178.50   14.57
   0   8   1  154.34    9.51
   0  -8   1  210.68   16.62
   8  -8  -1  175.20   22.82
  -8   0   1  154.13   19.82
  -8   0   1  190.45   16.49
   0  -8  -1  175.32   20.16
   8   0  -1  164.47   15.06
   0   8  -1  181.94   10.65
   0  -8  -1  162.76   14.25
   0  -8  -1  160.17   14.24
  -5  -4  -1   27.61    9.42
   4  -9  -1    8.45    8.14
   5  -9   1   20.68    6.25
   4   5   1   14.91    9.55
   9  -4   1    0.30    8.65
   9  -5  -1   19.11    9.39
   9  -5  -1   10.79    8.03
   4  -9  -1   18.07    5.40
   9  -4   1   22.34   13.44
   9  -4   1   16.67    7.91
   5  -9   1   27.44    5.83
   4  -9  -1   18.61    8.21
   9  -5  -1   32.07   14.56
  -4  -5   1    7.64    8.87
   9  -4   1   -8.93   10.98
   5   4  -1   15.05    3.92
  -4  -5   1    8.34    8.90
   4   5   1   25.25    7.39
  -5  -4  -1   14.59   10.01
  -9   5  -1   11.58    8.76
   4  -9  -1    4.10    6.51
   5   4  -1   26.45   12.32
   5   4  -1   19.54    3.98
  -4  -5   1    1.44   11.51
   5  -9   1   28.79   14.59
   4   5   1   27.98    8.79
   5   4  -1   11.36    8.83
   9  -4   1   13.91    9.93
   9  -5  -1   16.89    8.31
   5   4  -1   13.03   12.17
   5  -9   1   29.16   10.90
  -9   5  -1   34.60    8.89
  -5  -4  -1   18.28    8.37
   5   4  -1    6.60    7.96
   5   4  -1   25.96    8.01
  -9   4   1   13.97   12.98
  -5  -4  -1   20.48    9.15
  -9   4   1   22.82    8.06
   9  -5  -1   26.85   13.94
   5  -9   1   25.69    9.58
   9  -4   1   13.45    8.74
  -5  -4  -1   20.76   11.66
  -4  -5   1    9.26    7.58
   4  -9  -1   21.21    9.96
  -9   4   1   30.80   10.35
   4  -9  -1   15.50   13.71
  -9   4   1   23.34    7.92
   4   5   1   12.08    8.01
   5  -9   1   26.89    5.73
  -4  -5   1   17.55   10.69
   9  -5  -1   18.97    8.39
   5   4   1   23.18    8.56
   5   4   1   26.62    8.49
  -5  -4   1    7.17   10.52
   4   5  -1   11.01    7.91
  -5  -4   1   20.42    9.82
  -5  -4   1   28.39    9.15
   4   5  -1   20.56    8.32
  -9   4  -1   14.58    9.71
   4  -9   1   22.79    6.84
  -4  -5  -1   14.26    8.15
   9  -5   1   18.11    8.62
  -5  -4   1   13.23    8.37
  -4  -5  -1   13.77   11.31
   4  -9   1   25.07   14.86
   4   5  -1    4.74    6.61
   5   4   1   -0.59    8.94
   4   5  -1   32.99   11.58
   5  -9  -1   24.09    6.23
   9  -4  -1   31.70   13.80
  -4  -5  -1   13.82    7.85
   5   4   1   21.08    4.63
   5  -9  -1    9.42   13.19
   5  -9  -1   13.84    4.67
  -9   5   1   14.76    7.28
   4  -9   1   23.30    6.40
  -5  -4   1   22.41    8.90
   9  -5   1   19.33    8.61
   9  -5   1   17.15   14.81
   4   5  -1   16.47   10.94
   9  -5   1   29.35   14.46
  -4  -5  -1   24.13    9.42
  -9   4  -1   16.93    7.29
   9  -5   1   19.32   12.86
   5   4   1   17.87   10.63
   5  -9  -1   32.70   10.23
   9  -4  -1   19.57   12.56
  -9   5   1   27.83    9.23
   9  -5   1   13.82    9.13
   9  -4  -1   11.67    9.19
   9  -4  -1   21.61    8.50
   9  -4  -1   12.18    7.89
  -9   4  -1   41.15   14.90
  -9   5   1   18.60   14.31
   4  -9   1   26.69   10.61
  -9   4  -1   15.90    7.95
   5  -9  -1   -0.29    8.29
  -9   5   1   19.83    7.94
   9  -4  -1    5.86    7.97
  -4  -5  -1   27.82    9.63
   5   4   1    5.45    6.14
   5  -9  -1   14.13    6.62
   9  -3   1   37.19   12.50
   6   3  -1   33.79   14.54
  -6  -3  -1   -2.64    8.73
   3  -9  -1    9.11   10.01
   3  -9  -1   22.07    7.74
   3  -9  -1   33.36    6.74
   3  -9  -1   18.31    5.63
   9  -3   1   25.29    9.82
   3  -9  -1   19.84   13.51
   6   3  -1   26.46    8.96
   3  -9  -1   29.51    7.57
   9  -3   1   39.47   13.70
  -3  -6   1   19.86    9.68
   3  -9  -1   28.71   10.44
   6  -9   1   22.69   10.38
  -3  -6   1   25.78    9.48
  -3  -6   1   44.54   14.46
   9  -6  -1   26.70   12.87
  -3  -6   1   14.96    8.82
   9  -6  -1   40.18   10.39
   9  -6  -1   15.12    8.19
   9  -3   1   30.40   12.12
   9  -6  -1   30.00   15.03
  -9   3   1   13.93    7.97
   3   6   1   29.24    6.65
  -9   6  -1   20.37    7.05
  -9   6  -1   15.38    8.66
   3   6   1   32.87    9.30
   6  -9   1   22.59    5.78
   6  -9   1   26.08    5.92
  -9   3   1   23.03   13.43
   3  -9  -1   10.28    7.75
  -9   6  -1   21.75    8.73
  -6  -3  -1   26.36    8.55
   9  -3   1   22.96    9.41
   9  -3   1   21.31    8.68
   6  -9   1   25.97   10.53
   6  -9   1   18.35   13.32
   6  -9   1   21.02    6.11
   3   6   1   30.83   10.45
   6  -9   1   44.04   13.82
   6   3  -1    7.84    6.62
  -6  -3  -1   16.70    9.26
   6   3  -1    8.23   12.67
  -9   3   1   32.03   11.50
   6   3  -1   27.14    5.41
   6   3  -1   25.43    9.25
  -6  -3  -1   37.47   11.50
  -9   3   1   50.38    9.80
  -6  -3  -1   36.03    9.21
  -3  -6   1   37.79    9.60
   3   6   1   46.96    9.26
   3   6   1   39.96    9.37
   9  -6  -1   22.90    8.98
   9  -6  -1   28.23    8.15
   6  -9  -1   30.98   15.04
   6   3   1   22.17    8.17
   9  -3  -1   24.01   12.45
   9  -6   1   34.95    9.35
   3  -9   1   25.51    7.04
   9  -3  -1   15.66    9.93
   3   6  -1   14.77    9.85
  -9   3  -1   19.84    7.85
   3  -9   1   26.90   10.96
  -9   3  -1   17.96   12.19
   3  -9   1   42.73    8.21
   9  -6   1   14.70    6.50
  -6  -3   1   21.14    9.09
   3  -9   1   18.33    6.28
   6   3   1   40.24    9.68
   6  -9  -1   12.91   10.02
  -9   6   1   20.56    7.77
  -3  -6  -1   18.96    8.97
   6  -9  -1   18.30    6.16
  -9   3  -1   18.68    8.18
   3   6  -1   31.28    8.67
   6   3   1   39.67    6.32
   6  -9  -1   12.03    9.66
   9  -3  -1   41.39   13.70
  -6  -3   1   37.67   13.89
  -3  -6  -1   43.95   10.54
   3   6  -1   27.16    7.28
  -3  -6  -1   21.80   12.28
  -6  -3   1   18.49    8.33
   6   3   1   13.08    8.35
  -3  -6  -1   43.87   10.21
   6   3   1    9.98   12.59
  -9   6   1   26.26    9.60
  -9   6   1   41.62    9.52
   3  -9   1   33.35    7.78
  -6  -3   1   16.39   10.82
   9  -6   1   23.60   14.44
   9  -6   1   33.71   15.25
   6  -9  -1   27.26    6.26
  -3  -6  -1   18.96    8.71
   3  -9   1   28.59   14.74
   9  -3  -1   21.74    9.08
   6   3   1   23.08   11.17
   9  -3  -1   31.70   10.08
  -6  -3   1   22.56    8.37
   9  -3  -1   24.10    8.59
   3   6  -1   18.84   10.65
   9  -6   1   30.61    8.90
  -9   3  -1   41.29   12.22
   6  -9  -1   24.69    5.44
   9  -6   1   37.98   10.29
   6  -9  -1   26.47   13.56
   2   7   1   28.96    8.27
   2   7   1   26.04    8.64
   2   7   1   32.27    6.54
   7   2  -1   37.11   14.20
  -7  -2  -1   45.92   11.81
  -2  -7   1   34.82    8.81
   9  -2   1   42.68   12.67
   2   7   1   31.91   12.09
   2  -9  -1   31.54   10.89
   2  -9  -1   43.02   11.83
   9  -7  -1   27.98    7.58
  -7  -2  -1   30.29    9.26
   7  -9   1   32.44    5.77
  -9   7  -1   26.41    7.81
  -9   2   1   27.51    9.00
  -9   2   1   29.55    8.86
   9  -2   1   17.72    9.76
   2  -9  -1   52.40    9.56
  -9   2   1   64.23   10.62
   7  -9   1   21.30   10.82
   7  -9   1   35.73    6.46
  -2   9  -1   37.45    7.41
   9  -7  -1   37.41    9.37
  -7  -2  -1   32.08   12.66
  -7  -2  -1   28.59    9.10
   7   2  -1   44.20    9.69
   9  -2   1   52.17   11.22
   7   2  -1   53.42   10.61
   9  -7  -1   31.19    8.81
   7   2  -1   41.93    8.57
   2  -9  -1   40.29    7.65
  -9   2   1   33.70   13.35
   9  -2   1   24.16   12.24
   9  -2   1   29.99   11.24
  -2  -7   1   25.89    8.99
  -2  -7   1   33.08   16.05
   9  -7  -1   41.89    9.93
   2  -9  -1   40.64    6.32
   9  -2   1   26.16    8.69
   7  -9   1   48.58   11.13
   7  -9   1   34.93   15.91
   7  -9   1   34.66    6.77
  -7  -2  -1   39.36    9.24
   2  -9  -1   35.46    7.30
  -9   7  -1   32.30   10.44
   2  -9  -1   39.05   13.99
  -2  -7   1   45.51   10.70
   9  -7  -1   43.14   16.52
  -9   2   1   36.83   11.99
  -2  -7   1   41.10    9.95
   7  -9   1   37.20   15.06
   9  -7  -1   51.61   15.44
   7   2  -1   26.89    6.83
   2  -9  -1   37.81    7.35
   7   2  -1   27.77   17.94
  -9   7  -1   32.39    7.20
   2   7  -1   47.42   12.02
   9  -2  -1   39.33   12.98
   7   2   1   42.12    9.57
   7  -9  -1   41.67    7.01
  -9   2  -1   39.20   13.25
  -9   7   1   37.51   10.36
  -2   9   1   50.68    8.42
  -9   7   1   31.73    7.67
  -2  -7  -1   25.63    9.76
  -2  -7  -1   39.45    9.89
  -9   7   1   47.51    7.72
  -2  -7  -1   19.77    9.51
   7  -9  -1   41.71   10.79
  -7  -2   1   41.84    9.28
   2  -9   1   47.58   14.89
   2   7  -1   38.61    9.59
   9  -2  -1   35.22    9.01
   2   7  -1   29.48    8.77
   2  -9   1   38.40    7.90
   7  -9  -1   43.54   11.92
  -9   2  -1   59.77    9.73
   9  -7   1   45.49    8.52
   9  -7   1   42.09   14.16
   2   7  -1   42.36    7.65
   2  -9   1   33.74    8.42
   2  -9   1   52.46   12.46
   2  -9   1   41.94   10.49
   7  -9  -1   44.61   14.39
   9  -7   1   32.01    8.54
   7   2   1   35.59    7.37
   7   2   1   39.39   16.67
  -7   9  -1   24.48   10.82
   2  -9   1   37.19    6.28
  -9   2  -1   30.50    8.81
   7   2   1   42.54   10.16
   7   2   1   52.55   10.66
  -9   2  -1   47.42   12.80
  -7  -2   1   33.71   10.50
   9  -2  -1   41.96   13.97
  -2  -7  -1   48.68   15.40
   9  -7   1   42.76   17.45
   9  -2  -1   10.70   10.87
  -2  -7  -1   33.11    8.66
   9  -2  -1   38.44    9.58
   7  -9  -1   44.50   15.05
   7  -9  -1   36.38    6.25
   2  -9   1   42.75    6.53
   9  -7   1   36.75    9.94
   7  -9  -1   37.45    6.76
   7   2   1   46.91   15.16
  -7  -2   1   48.40   10.48
   2  -9   1   44.55    7.83
  -7  -2   1   23.33    8.93
  -7  -2   1   34.41   11.97
   9  -2  -1   24.78    9.95
   9  -7   1   38.15    8.48
  -1   9  -1   33.54   12.69
  -8   9   1   20.10   10.20
   8   1  -1   22.86    8.85
   1  -9  -1   20.95    4.19
   1   8   1   30.32    6.90
  -9   1   1   20.45    8.49
   9  -1   1   22.31   10.49
   9  -1   1   40.81   15.40
   8  -9   1   15.23   11.57
  -8  -1  -1   20.62    8.93
   8   1  -1   35.56   14.82
   9  -8  -1   20.98    8.95
   1  -9  -1   23.09    8.94
  -9   1   1   21.59   13.67
  -1  -8   1   15.09    7.85
   9  -8  -1   24.56    7.49
   1  -9  -1   22.06    7.37
   1   8   1   21.06    8.36
  -9   8  -1   27.54    6.63
   1  -9  -1   23.45    8.33
   9  -8  -1   17.63    8.15
  -9   1   1   20.86   12.41
   8  -9   1   28.44    5.97
   1   8   1   35.15   11.50
   8  -9   1   32.97   15.32
  -8  -1  -1   22.27    8.58
   1  -9  -1   23.52    3.99
  -8  -1  -1   26.59    8.62
  -1  -8   1   22.67    9.81
  -8  -1  -1   70.42   20.81
   9  -8  -1   32.62   13.22
  -1  -8   1   18.25    9.00
   9  -8  -1   24.96   15.61
  -8  -1  -1   31.52   11.70
   9  -8  -1   15.92    7.40
   8   1  -1   21.05    7.49
   1  -9  -1   20.97   13.29
   9  -1   1   22.75    9.92
   9  -1   1   32.83   12.46
  -9   8  -1   31.94   11.04
   9  -1   1   14.56    9.75
  -1   9  -1   28.43    4.15
   1  -9  -1   18.45   10.81
   9  -1   1   19.08    8.92
   8   1  -1   22.53    9.85
   8  -9   1   29.58    6.62
   8   1  -1   28.90    8.43
   8  -9   1   31.52   10.46
   1   8   1   28.64    5.52
   8  -9   1   24.43   14.86
   8  -9   1   24.22    7.06
  -9   1   1   42.85   10.14
  -1   9  -1   22.89    7.09
  -1  -8   1   22.71   15.00
  -9   1   1   32.71    8.64
  -1  -8   1   11.88    7.99
   1  -9   1   14.55   13.05
   1   8  -1   16.08    7.16
  -8  -1   1   37.17    9.28
  -9   1  -1   29.32    8.87
   9  -1  -1   23.53   10.23
   8  -9  -1   32.82   11.81
   9  -1  -1   21.85   10.34
  -8  -1   1   24.58    8.67
   1  -9   1   34.67   11.12
   8   1   1   49.44   15.05
  -1  -8  -1   18.89    8.88
  -1  -8  -1   36.75    9.56
   9  -1  -1   28.55   12.82
   9  -1  -1   19.05    7.64
   1   8  -1   23.30    5.98
   9  -1  -1   36.89   13.06
  -9   8   1   32.78   10.47
   8   1   1   29.80    9.63
  -1  -8  -1   36.58   14.94
   9  -1  -1   18.75    8.42
   8  -9  -1   19.13   14.48
   1  -9   1   17.45    8.54
   1   8  -1   20.51   11.19
   1  -9   1   14.36    7.77
   8   1   1   15.25    7.43
  -1   9   1   20.94    7.56
  -8  -1   1   25.84    9.25
   1  -9   1   24.89    7.53
  -9   1  -1   20.25    9.21
   9  -8   1   20.19    7.11
  -9   1  -1   26.02    8.98
  -1  -8  -1   23.24    9.44
   1   8  -1   23.88    8.08
  -9   1  -1   39.21   13.20
   8   1   1   28.52    9.60
   8   1   1   19.62    8.88
   8  -9  -1   18.49    6.14
  -8   9  -1   33.38   11.09
  -9   1  -1   23.84   13.74
  -8  -1   1   39.11   12.31
  -1  -8  -1   19.41    9.98
   9  -8   1   31.29   10.25
   8  -9  -1   27.76    9.56
   9  -8   1   14.65   13.18
   8   1   1    2.45   13.21
  -8  -1   1    5.54    8.83
   9  -8   1   22.88   16.05
   9  -8   1   23.08    7.46
   9   0   1   26.12   12.68
   0  -9  -1  -10.81   12.20
  -9   0   1   -0.39    8.12
   0   9   1   -0.58    3.97
   0  -9   1    4.77    7.69
   9   0  -1   25.09   12.52
   9   0   1    1.28    9.28
   9  -9   1    4.89    9.60
   9   0  -1   -5.45    7.58
   0   9  -1   -3.34    6.57
  -9   0   1   -0.10   10.65
   9   0   1   -9.78   12.26
   9  -9  -1   -3.65    7.93
   0  -9  -1   -4.64    8.24
   0   9   1   21.05   10.97
   9   0  -1    4.16    9.69
   9  -9  -1   -4.87   14.91
   0  -9  -1    2.30    9.43
   0  -9  -1   -9.27    7.38
   9  -9   1    8.72   14.36
   9   0   1   -6.98    7.89
   0  -9   1    7.29   13.95
   9   0   1    7.17    8.38
  -9   9   1   -2.08    9.08
   9  -9  -1    2.40   10.64
   9   0   1   -1.05    7.53
   0  -9   1    3.97    7.63
   9  -9   1   -0.63    5.66
   9  -9   1   -7.05    5.88
   9  -9  -1   -0.83    6.01
  -9   9  -1    6.32    9.79
   0   9  -1   -4.84   10.83
  -9   0   1    2.82    7.84
   9   0  -1    2.62   12.25
   0  -9   1   21.91   11.43
  -9   0  -1   -6.64    7.61
  -9   0  -1   10.52    8.47
   0  -9  -1  -17.97    6.13
  -9   0   1    3.92    9.15
  -9   0  -1    4.24   11.45
   9  -9  -1   -7.29    5.43
   9   0  -1   -4.31    7.50
   0   9  -1    2.61    4.42
   0   9   1    5.61    7.20
   9  -9   1    9.94    6.58
   9   0  -1   -1.98    7.84
   9  -9   1    7.55   11.33
  -9   0  -1  -13.11   10.22
  -9   0  -1    8.65    9.69
   0  -9   1   -3.16    7.99
   0   9  -1   -7.71    5.00
  -9   0   1    0.33    7.92
   9  -9  -1   -1.94    5.97
  -5  -5  -1   -8.67    8.13
 -10   5  -1   -6.81    6.52
  10  -5   1   15.20    8.65
  -5  -5   1    9.16    9.52
  10  -5   1    9.94   12.44
   5 -10  -1    8.58    6.39
  10  -5  -1   -1.23    8.28
  -5  -5   1    0.51    8.30
  -5  -5  -1   14.87    8.69
   5   5   1   -3.50    6.40
   5 -10   1   -3.47    5.28
   5   5  -1    7.25   11.18
   5 -10  -1    2.85    5.69
   5 -10   1    2.72    5.92
   5   5   1   -4.48    8.29
   5 -10  -1    7.92   13.40
 -10   5   1   -3.05    7.60
 -10   5   1   -7.20    7.11
  10  -5  -1  -21.31   11.22
   5 -10  -1   -3.94    8.59
   5   5  -1   -1.22   10.66
   5 -10  -1  -19.12    8.04
 -10   5  -1   -1.27    9.56
  -5  -5  -1   -4.64    8.51
  10  -5   1   -3.90    9.01
  10  -5   1   30.76   14.45
   5 -10   1   -4.99    5.07
   5 -10  -1   -9.53    8.36
   5   5   1    8.06    9.93
   5 -10  -1    3.22    4.72
   5 -10   1   -5.88    8.13
  10  -5  -1    5.67   13.62
  10  -5  -1   -6.17    9.42
   5   5   1   -3.41    7.68
   5   5   1    3.82    9.74
  -5  -5   1    0.17    8.29
 -10   5   1   28.33   15.37
 -10   5   1    4.90    9.23
   5   5  -1  -12.06    8.02
  -5  -5   1    4.73   10.67
 -10   5  -1    3.84    7.91
   5   5  -1    8.82    7.53
  10  -5  -1    1.13    9.53
   5 -10   1   19.20   10.37
  10  -5   1    2.03    8.85
  10  -5   1    4.64    8.96
  -5  -5  -1   17.15    9.98
   5 -10   1    2.90   13.92
  -5  -5   1   -0.34    8.79
  -5  -5  -1    0.45    8.66
  10  -5  -1    0.49    7.61
   5   5  -1   12.50    7.92
   6 -10   1   10.81    5.53
  -6  -4  -1   20.38   10.87
   6   4  -1   -1.48   11.07
  10  -4   1   14.54    8.55
   6   4  -1   -0.91    8.18
  -4  -6   1   11.68    9.34
   6   4  -1    1.52    3.99
  10  -6  -1   -7.91    7.70
  -6  -4  -1   14.74    9.20
  -4  -6   1   -2.91    8.58
   6   4  -1   -1.20    7.76
   4 -10  -1   19.85   11.28
  -4  -6   1   14.13    8.31
   4   6   1   11.50    9.73
   4 -10  -1    6.97    5.78
 -10   6  -1    6.81    6.88
  10  -4   1   18.68    9.80
 -10   6  -1   13.51    8.99
   4 -10  -1    7.15   13.71
   6   4  -1    9.33   12.13
 -10   4   1   23.38   14.17
  -6  -4  -1   -7.57    7.62
  10  -6  -1   17.65   14.77
   6 -10   1    6.45    5.31
  -4  -6   1    8.51   11.40
  -6  -4  -1    5.15    9.49
  -4  -6   1   -8.75    9.33
   4   6   1    8.51    6.29
  10  -6  -1   11.80    9.21
   4 -10  -1   12.02    8.09
  10  -4   1   -3.16    8.38
   6 -10   1    9.09   10.42
 -10   6  -1   -1.70    7.81
   4 -10  -1    3.72    9.74
   4   6   1    6.35    8.26
   6 -10   1    8.17    9.45
  -6  -4  -1    7.10    8.91
  10  -4   1   -3.52   11.25
   6   4  -1    3.81    6.65
   4   6   1   10.35    8.84
   6 -10   1   21.29   15.33
   6 -10   1    7.02    5.33
   4   6   1   10.90    9.36
 -10   4   1   13.41    8.04
  10  -6  -1   10.77   12.85
  10  -6  -1    2.44    6.83
 -10   4   1   -4.11    7.84
  10  -6  -1   23.20   10.83
  10  -4   1    6.66   10.68
 -10   4   1   -9.88    9.22
   4 -10  -1   12.84    7.62
   6   4  -1    6.72    4.18
  10  -4   1   10.13   12.70
   4 -10  -1   -1.08    6.92
  10  -6   1   -7.01   12.14
   6   4   1   10.36   10.30
 -10   4  -1   12.16   10.78
   6 -10  -1   17.58   12.41
  -4  -6  -1   18.29    9.45
  -6  -4   1   -5.89    9.99
 -10   6   1   -4.44    7.68
   6 -10  -1    2.64    6.33
  -4  -6  -1   22.82   11.95
   4 -10   1    8.46    9.13
   6   4   1   -4.77    8.56
   6 -10  -1   15.05   13.78
   4 -10   1   11.17    8.11
   6 -10  -1   -6.13    8.65
  10  -4  -1    5.35   11.64
  10  -6   1    7.77    7.82
   4   6  -1   10.35   10.55
  10  -4  -1   20.11   13.36
   4 -10   1    5.69    6.29
  10  -4  -1   11.29    8.10
   6 -10  -1   -2.75    8.41
  -4  -6  -1    1.30    7.66
   6   4   1    8.44    7.70
   6   4   1    7.20    8.53
   6 -10  -1   -2.08    4.20
   6 -10  -1   -0.26    5.57
  10  -6   1   16.74   14.50
   4   6  -1    4.55    8.30
   4 -10   1   16.24    7.25
   4 -10   1    2.00    6.06
  -4  -6  -1   14.78    9.35
   4 -10   1   -5.62   13.76
   4   6  -1   17.84    6.94
 -10   6   1    7.85    8.10
   6   4   1    4.54    4.61
 -10   6   1   15.22    7.79
   6   4   1    3.84   11.12
  -6  -4   1    1.46    7.50
  -4  -6  -1   11.37   10.25
 -10   4  -1    2.57    7.49
  10  -4  -1    4.84    8.49
  -6  -4   1   16.88    9.81
  10  -4  -1   17.45   10.06
 -10   4  -1    3.28    7.94
  -6  -4   1   11.20   13.12
   4   6  -1    5.66    8.03
  10  -6   1    0.87    8.57
 -10   4  -1   -2.41   13.04
  10  -4  -1   -2.13   10.21
  10  -6   1   -0.59    8.09
  10  -6   1    1.83    8.62
  -6  -4   1    2.28    8.39
 -10   3   1    3.50    8.44
   3 -10  -1    0.38    5.83
  -3  -7   1    5.59    8.90
   7   3  -1    1.78    5.10
  10  -7  -1   13.35    8.45
   7 -10   1   -1.56    4.96
   7   3  -1   -8.52   12.28
   7   3  -1    2.84    7.41
   7 -10   1   19.91   13.30
  10  -7  -1   -3.80   12.29
 -10   3   1  -16.38    9.84
   3 -10  -1   14.96   13.52
   3 -10  -1   -3.09    6.43
  10  -7  -1   -1.16   14.95
   3   7   1   -3.79    7.81
  10  -3   1   20.59   13.31
  10  -3   1   14.26   10.08
  -7  -3  -1    0.96    8.81
   3 -10  -1   -0.93    5.68
  10  -7  -1    6.73    8.40
   7 -10   1    0.28    9.32
   3   7   1    7.27    5.77
 -10   7  -1    9.65    9.46
  10  -3   1    6.85    7.99
  10  -3   1   -3.51    8.07
   7 -10   1   15.36   14.42
  10  -7  -1    8.12    6.74
  -3  -7   1    6.34    9.33
  -3  -7   1    4.15   12.99
   3 -10  -1   16.06   11.04
   7 -10   1    4.08    4.90
 -10   7  -1   16.89    7.01
  10  -7  -1    2.85    8.71
   7   3  -1  -14.56   13.95
  10  -3   1   -0.29   11.09
  10  -3   1   18.09   11.66
  -7  -3  -1    8.25    8.51
   3   7   1    1.20    7.68
  -7  -3  -1  -20.11   11.68
  -7  -3  -1   -2.86    9.39
 -10   3   1   -9.70   12.17
   7   3  -1   11.40    9.22
   3 -10  -1   13.42    6.41
  -3  -7   1    8.52    9.49
   7   3  -1   12.20    9.10
 -10   7  -1    2.93    7.73
   3   7   1    3.28    9.00
 -10   3   1   20.63    8.34
   7 -10   1   -1.32    9.35
   7 -10   1   -1.56    5.25
   3 -10  -1   22.79   10.38
  -7  -3  -1   -4.14    8.77
   7   3   1   -9.33   12.94
   3 -10   1    9.75    6.21
   3   7  -1    3.31    6.14
   7   3   1  -21.20    7.43
   3 -10   1   14.32    9.77
  -7  -3   1   -9.08    9.35
  10  -3  -1    4.97    9.48
   3   7  -1   -9.56    7.46
   7 -10  -1   10.76    4.92
 -10   7   1    9.83    6.91
  10  -3  -1    4.16    8.77
 -10   3  -1   24.44   13.23
  -3  -7  -1   20.07    9.55
  -7  -3   1    1.19    7.52
  10  -3  -1   14.34    8.02
  10  -7   1   10.40    8.87
  10  -3  -1   21.41   12.40
  -3  -7  -1    0.49    8.64
  10  -7   1   -0.34   12.25
  10  -3  -1   15.89   11.35
  -3  -7  -1    7.92    9.45
  10  -7   1   -1.79    7.80
  10  -7   1   -5.97    5.82
  10  -3  -1   11.69   11.92
   7   3   1   12.93    7.87
  10  -7   1    2.15    7.87
  10  -7   1  -14.36   12.57
   7 -10  -1  -10.58    5.02
   7   3   1    6.65    5.51
   3 -10   1    5.71    6.15
   3   7  -1    8.98    8.32
  -3  -7  -1   11.84   11.92
  -7  -3   1   -1.08    8.16
   3   7  -1    5.03   10.07
   7 -10  -1   -4.97    8.13
  -7  -3   1   10.40    8.98
   7 -10  -1    3.01    5.52
  -3  -7  -1   -7.39    8.40
 -10   3  -1    3.20    8.22
 -10   3  -1    3.20    7.97
   3 -10   1    0.95   10.62
   7   3   1    1.22    8.71
 -10   3  -1   15.40   11.41
 -10   7   1    7.31    8.93
   7   3   1   -0.74   12.49
   3 -10   1    8.74   14.24
   3 -10   1   -0.60    6.79
  -7  -3   1    1.32   12.31
   7 -10  -1    9.91   13.27
   7 -10  -1    4.80    9.56
   3 -10   1   -3.16    6.39
 -10   7   1   -9.58    6.29
   7 -10  -1    6.60   12.24
   2 -10  -1    1.58    8.27
   2   8   1   23.81    5.99
  10  -8  -1   16.02   14.09
  10  -8  -1   28.37   16.81
  10  -8  -1    8.30    9.32
  -2  -8   1   20.72    9.53
   8 -10   1   11.16    9.71
   2 -10  -1   20.12    7.29
  -8  -2  -1   19.45    8.99
  10  -2   1    7.92   11.32
   8   2  -1   13.06    8.99
 -10   2   1   36.89   14.64
 -10   2   1   29.90   13.89
   8 -10   1   33.26    7.17
 -10   8  -1   15.21    6.80
  10  -2   1   35.06   11.46
   8   2  -1   38.46   10.23
   8   2  -1   -3.59   18.38
   2 -10  -1   22.54    7.46
   2   8   1   16.70   10.74
   8   2  -1   -2.32   13.56
  -2  10  -1   17.08    7.31
 -10   8  -1   21.15   10.48
  10  -2   1   28.36   10.82
  -8  -2  -1   16.93    9.26
  10  -8  -1   27.16    8.44
   2 -10  -1   34.23    5.63
 -10   2   1   23.51    8.11
 -10   2   1   25.50    9.12
   8   2  -1    8.28    6.97
  10  -8  -1   13.27    8.48
   2 -10  -1   26.46   14.21
   8 -10   1   19.09    5.48
  10  -8  -1   31.87    8.08
  -8  -2  -1    7.19    9.29
  10  -2   1   42.47   13.88
  -8  -2  -1   34.57   11.75
   8 -10   1   15.99    5.85
  10  -2   1   27.44   10.68
   2 -10  -1   24.66    6.03
 -10   2   1   21.18    9.13
  -2  -8   1   28.61   10.93
   8 -10   1   21.93   11.18
   8   2  -1   23.87   10.21
   2   8   1   37.98    8.59
  -2  -8   1   22.64    9.45
   2 -10  -1   18.59   10.46
 -10   8  -1   23.92    7.43
  -2  -8   1   34.95   17.17
   2 -10  -1   22.58   11.85
   2   8   1   43.31    9.58
  10  -2   1   23.10    9.13
  -8  -2  -1   16.71   13.82
  -2  -8   1   16.38    9.90
   8 -10   1   17.70   14.45
   8 -10   1   19.21   15.03
   2   8  -1   16.68    6.19
   2   8  -1   10.76   10.76
  10  -8   1   21.75    8.39
   2   8  -1    8.77    7.86
   2 -10   1   30.10   14.34
   8 -10  -1   16.97    9.70
   8 -10  -1   23.16   14.25
  -2  -8  -1    9.03    7.80
   8 -10  -1   14.46   13.61
   8   2   1   15.38    9.29
 -10   2  -1   22.01   12.57
 -10   2  -1    0.20    7.95
   8   2   1   51.91   15.42
   2   8  -1   13.45    8.24
  -2  -8  -1   21.21    9.83
  10  -8   1   17.83   13.55
   2 -10   1   19.30    7.63
   8   2   1  -14.70   16.96
 -10   8   1   18.90    7.54
  -8  -2   1   24.07    9.20
 -10   8   1   15.80    6.09
  -2  10   1   20.81    8.08
 -10   8   1   25.78   10.79
   2 -10   1   21.81    4.88
  10  -8   1   24.76   10.05
  -8  -2   1   27.53   10.09
  10  -8   1   24.64   16.50
  10  -2  -1   33.18   10.58
  -2  -8  -1    5.30    9.56
   8 -10  -1   23.01    7.31
   2 -10   1    9.53    9.92
   8   2   1   18.42   10.52
  -2  -8  -1   33.46   16.19
   8   2   1    4.57    6.93
  10  -2  -1   12.65   12.09
   8 -10  -1   22.88    5.90
  -8  -2   1    6.09    8.69
  10  -8   1   25.57    8.63
  -8  -2   1   13.53   11.80
  -8  -2   1    8.06    9.62
   2 -10   1   29.03   12.13
   8 -10  -1    5.56    9.88
   2 -10   1   21.99    5.38
   8 -10  -1   19.43    6.04
   2 -10   1   17.28    8.00
  10  -2  -1    5.31   10.20
 -10   2  -1   21.69    9.54
  10  -2  -1   42.51   13.41
  10  -2  -1   13.72   11.09
  -2  -8  -1   15.58    8.37
   2 -10   1   29.78    8.05
  10  -2  -1   29.51    9.63
  10  -8   1   16.22    7.92
 -10   2  -1    8.39   12.60
   8   2   1   12.63    6.59
   9   1  -1   44.34   11.85
   1 -10  -1   43.70    8.89
  -1  -9   1   19.59   17.75
  10  -9  -1   57.96   18.37
 -10   9  -1   33.46   11.44
  -9  -1  -1   24.36   12.23
  -1  -9   1   47.96   13.03
   9   1  -1   41.13   11.19
   9   1  -1   35.22    9.11
  -1  -9   1   33.18   10.63
 -10   1   1   26.96    9.37
  10  -9  -1    3.71    8.61
  10  -1   1   27.32   10.76
  -9  -1  -1   38.18   11.06
   9 -10   1   24.37   15.52
  -9  -1  -1   40.96   10.37
 -10   1   1   34.77   13.68
  10  -9  -1   29.53    8.62
  10  -1   1   53.11   14.48
   1   9   1   30.64    9.20
  -1  -9   1   23.27    9.02
  10  -1   1   22.39   10.07
   1 -10  -1   28.89   11.79
  10  -9  -1   41.64    8.66
 -10   1   1   24.86    8.65
   9 -10   1   25.94    7.19
  -1  10  -1   46.17    8.88
   1 -10  -1   21.24    8.31
   9 -10   1   28.79    6.16
   9 -10   1   40.27   12.83
   9   1  -1   30.27   15.28
  10  -1   1   41.91   10.86
   9   1  -1   36.65   10.46
   1 -10  -1    7.51   14.41
   9 -10   1   17.70   10.33
   9 -10   1   37.91   18.12
  10  -1   1   25.84   11.43
  -9  -1  -1   26.81   14.04
   1   9   1   28.12   12.32
  -9  -1  -1   25.96    9.68
   9   1  -1   25.78   17.67
 -10   1   1   32.43   11.90
  10  -1   1   97.55   19.51
   9 -10   1   25.84    6.72
   1   9   1   29.46    7.01
  -9  10   1   38.01   11.14
   1 -10  -1   26.15    9.57
  10  -9  -1   22.20    7.68
  10  -9  -1   19.33   13.10
  -1  -9   1   43.03   11.33
  10  -1  -1   17.23   10.99
 -10   9   1   49.46   12.07
 -10   1  -1   36.84   13.83
  -9  -1   1   53.31   11.26
  10  -1  -1   65.82   16.00
  10  -9   1   38.37    8.55
 -10   1  -1   25.00   10.87
 -10   1  -1   26.25    9.26
  10  -1  -1   30.13   14.64
   1 -10   1   30.19   11.35
   9   1   1   38.29    9.18
   9 -10  -1   51.14    7.44
   1 -10   1   35.40   12.18
   1 -10   1   29.08   15.94
   1 -10   1   26.97    8.96
   9 -10  -1   22.34    6.60
   1   9  -1   45.74   13.77
   9 -10  -1   21.65   15.15
  -1  -9  -1   14.73    8.85
   9   1   1   39.87   17.31
   9 -10  -1   35.41    7.58
   9 -10  -1   18.87    9.79
  -9  -1   1   14.61    8.84
  -1  -9  -1   31.14    9.13
  10  -9   1   14.42    7.59
   9 -10  -1   32.28   12.46
  -9  -1   1   44.33   10.82
   1 -10   1   29.99    9.80
  -9  -1   1   49.93   15.64
 -10   1  -1   19.09   13.10
   9   1   1   34.03   11.65
   1   9  -1   37.22    6.54
   9   1   1   31.57    8.60
  10  -9   1   25.38   17.73
   1   9  -1   31.96    9.05
  -9  10  -1   32.31   11.53
  10  -1  -1   38.13   11.32
   9 -10  -1   28.53    6.95
   1   9  -1   37.29    8.23
  -1  10   1   24.50    8.25
  10  -9   1   21.28   13.35
  10  -9   1   15.66    9.99
  10  -9   1   29.78    8.22
  -9  -1   1   31.73   13.20
  -1  -9  -1   29.09   10.75
  -1  -9  -1   46.90   12.81
   9   1   1   34.59   10.63
   9   1   1   32.65   15.17
   1 -10   1   17.62    8.34
 -10   1  -1   34.80   10.33
  10  -1  -1   28.87   10.25
  10  -1  -1    6.74   12.51
  -1  -9  -1    8.41   16.08
  10   0  -1  143.08   15.99
   0 -10  -1  133.00   17.92
 -10   0  -1  210.57   25.43
 -10   0   1  162.81   15.47
 -10  10   1  190.31   18.08
  10 -10   1  196.16   23.70
   0 -10  -1  166.14   23.33
   0 -10   1  183.26   24.84
   0  10  -1  176.47   11.09
   0  10   1  147.30   14.26
  10   0  -1  136.33   17.18
 -10   0  -1  143.13   15.12
  10 -10  -1  195.75   14.96
   0  10  -1  182.60   15.70
 -10   0   1  161.00   17.23
   0 -10  -1  158.10   16.07
   0 -10   1  163.79   16.46
  10 -10  -1  146.78   22.23
 -10   0  -1  202.94   17.96
  10   0   1  164.96   16.42
 -10   0   1  183.92   25.86
  10   0   1  183.42   18.01
   0  10  -1  206.54   23.15
  10   0   1  171.32   23.04
   0 -10  -1  160.67   16.91
  10 -10   1  194.39   14.15
  10 -10  -1  175.98   27.35
 -10   0   1  181.79   22.21
 -10   0  -1  172.08   16.46
  10   0  -1  227.62   25.69
   0  10  -1  146.91    9.88
   0 -10   1  188.86   17.39
  10 -10   1  178.66   18.43
  10 -10  -1  179.08   14.36
   0 -10   1  193.87   19.76
  10   0  -1  177.45   16.79
 -10   0  -1  196.48   23.12
 -10   0   1  139.74   14.93
  10 -10   1  212.16   27.42
  10   0   1  186.52   20.83
  10 -10   1  184.79   15.10
  10   0   1  173.34   18.18
  10   0   1  216.23   25.12
  10 -10  -1  177.60   14.70
  10   0  -1  191.43   23.64
 -10  10  -1  198.15   18.91
   6   5  -1   51.71   11.74
   5 -11  -1   45.92    8.74
   6   5  -1   36.56   13.64
   5   6   1   48.40   12.94
  11  -5   1   47.53   16.00
  11  -5   1   52.99   12.42
 -11   6  -1   43.50   11.27
   6 -11   1   51.18    7.77
  11  -5   1   52.22   16.25
   5   6   1   68.15   13.34
   6 -11   1   63.10   12.02
   6 -11   1   58.12   17.49
   5   6   1   58.32   11.04
  11  -5   1   61.87   11.92
  11  -5   1   54.32   13.39
  11  -6  -1   61.15   11.21
  -6  -5  -1   50.47   18.23
   6   5  -1   64.65   15.36
 -11   5   1   49.13   10.66
 -11   5   1   64.20   11.18
  -6  -5  -1   54.94   12.96
  -5  -6   1   45.44   11.32
  -5  -6   1   55.85   12.40
  -6  -5  -1   68.46   13.74
   5 -11  -1   41.89   16.40
   5 -11  -1   68.94   10.82
   6 -11   1   41.64    7.09
  -5  -6   1   76.27   15.20
  -6  -5  -1   67.39   11.89
 -11   6  -1   53.67   10.97
  11  -6  -1   73.12   13.22
 -11   5   1   48.31   17.83
  11  -6  -1   59.45   17.18
  -5  -6   1   43.39   12.19
   6   5  -1   67.66   11.01
   5 -11  -1   57.68    7.69
   6 -11   1   28.91   13.47
 -11   5   1   60.05   13.41
 -11   6  -1   47.91    9.68
  11  -6  -1   49.11   13.29
   5   6   1   49.90   15.70
  -6  -5  -1   46.42   11.30
   5   6   1   42.36   11.65
   5 -11  -1   57.42   11.07
   6 -11   1   59.07    8.05
   6   5   1   63.73   10.33
  -5  -6  -1   62.37   14.29
   5 -11   1   52.57   10.53
   6 -11  -1   59.36    8.43
  -6  -5   1   46.50   12.58
  11  -6   1   41.35   11.49
   6   5   1   62.97   12.44
  11  -5  -1   45.26   16.50
  -6  -5   1   72.12   14.56
  -6  -5   1   74.26   20.39
   6   5   1   61.25   15.31
   6 -11  -1   38.46   11.22
   5   6  -1   34.49   13.30
   6 -11  -1   58.85   17.32
   5 -11   1   47.24   17.92
   5 -11   1   60.93    8.60
 -11   6   1   55.09   10.09
 -11   5  -1   53.16   10.44
  -5  -6  -1   82.24   13.37
  -5  -6  -1   67.83   12.21
  11  -5  -1   47.93   11.73
   6   5   1   56.83   14.04
   6 -11  -1   53.16    6.97
  11  -5  -1   49.58   12.57
  11  -5  -1   69.17   17.39
  11  -6   1   78.03   18.30
 -11   6   1   65.94   10.88
   6   5   1   56.18   12.29
   6 -11  -1   40.63   16.94
   5 -11   1   74.58   14.63
  -6  -5   1   72.76   12.25
 -11   5  -1   47.47   13.83
   6 -11  -1   59.23    8.17
 -11   5  -1   67.88   19.31
  11  -6   1   38.86   14.98
  11  -5  -1   51.79   10.71
   6 -11  -1   57.62   10.65
  11  -6   1   62.12   11.94
   5 -11   1   58.89    8.39
  11  -6   1   51.71   12.56
 -11   6   1   52.30   11.39
   5   6  -1   82.58   19.18
   6 -11  -1   41.53   18.86
   5 -11   1   64.22   10.21
 -11   5  -1   65.59   11.48
  -6  -5   1   53.17   12.23
   5   6  -1   46.60   11.66
   4   7   1   -4.05    9.56
   4 -11  -1    3.16    7.05
 -11   4   1    6.85    8.62
   4 -11  -1    7.24    5.89
  11  -4   1   -9.81   12.12
  -7  -4  -1   -2.77    9.86
  -4  -7   1   11.97   10.17
  11  -4   1   -9.21   10.26
  -4  -7   1    9.23   12.54
 -11   7  -1   -8.73    6.40
   4 -11  -1   -3.89    6.99
   7   4  -1   -9.87    8.30
  -7  -4  -1   11.11    8.74
   4 -11  -1   -9.64   13.18
   7   4  -1   -2.82    4.66
   7   4  -1    2.63    8.43
  11  -7  -1   11.70    9.85
   4   7   1   -0.29    9.14
  11  -7  -1  -10.32    8.36
  -4  -7   1   -0.62    9.81
  -7  -4  -1   12.22    9.69
  11  -4   1    7.82   12.60
   7   4  -1   16.36   12.56
 -11   4   1   21.89   14.83
   7 -11   1   10.61   13.10
  -7  -4  -1   -7.26   12.26
  -7  -4  -1    2.44    9.42
  11  -4   1   -4.38    9.96
   7 -11   1    8.59    9.71
  11  -7  -1   23.95    9.56
   7   4  -1  -13.25   11.87
   4 -11  -1  -10.49   10.78
  -4  -7   1   -3.08    8.70
   4 -11  -1   -9.25    6.55
  11  -7  -1    5.13   13.85
   7 -11   1   -0.38   13.87
   7 -11   1   -5.00    4.82
   4   7   1    2.24    6.92
 -11   7  -1    3.82    8.91
 -11   7  -1    1.72    8.53
   4 -11  -1   10.79   10.96
   7 -11   1   -8.19    4.77
   7 -11   1    8.27   11.10
  11  -4   1    6.24    9.04
  11  -7  -1   15.28   15.37
 -11   4   1    5.47    8.33
 -11   7   1    9.82    9.03
   4 -11   1    3.82    6.08
   4 -11   1    4.63    7.54
   4   7  -1    7.49   10.44
   4   7  -1   -1.37    6.52
  -7  -4   1    2.82    9.84
  11  -7   1   -5.13    8.23
   4 -11   1   18.55    7.54
  -7  -4   1    5.15    9.23
 -11   4  -1   28.79   20.28
  11  -7   1   12.36    9.63
  11  -4  -1    3.66   11.76
   7 -11  -1   -1.48    9.11
   7 -11  -1   -1.54   13.64
  -4  -7  -1   11.48   12.05
  11  -4  -1   -1.47    7.75
   7   4   1   -4.36   11.65
 -11   4  -1    9.18    8.06
  11  -7   1    9.04   13.53
  11  -7   1   -0.09   14.50
  -7  -4   1    3.46   13.30
  11  -4  -1   -6.08   12.08
   4 -11   1   17.20   10.84
   7   4   1   -3.64    9.41
   7   4   1    5.05    7.65
   7 -11  -1   -9.60    5.53
  11  -7   1    3.10    9.15
  -7  -4   1   -0.74   11.28
   4 -11   1   -9.28    6.46
  11  -4  -1    3.48   10.69
  11  -4  -1   25.58   13.26
  -4  -7  -1    6.94    9.35
 -11   7   1   11.58    7.88
  -4  -7  -1   19.04   10.09
   4 -11   1   -1.51   14.83
   4   7  -1   -1.00    8.97
   7   4   1   11.30   12.53
   7 -11  -1   11.69    4.54
  -4  -7  -1   -6.18    9.92
   7   4   1   -3.73    4.98
 -11   4  -1    4.29   13.88
 -11   7   1   12.03    7.63
 -11   4  -1    3.61    8.48
   4 -11   1    1.86   11.09
   7 -11  -1   -1.73    5.52
  -7  -4   1   -9.01    7.83
   7   4   1    8.12    9.61
  11  -3   1  156.09   20.00
  11  -8  -1  158.15   25.48
   8 -11   1  186.65   25.38
  11  -3   1  151.37   19.10
  -3  -8   1  153.86   20.94
  11  -8  -1  137.21   14.68
   3 -11  -1  165.99   14.84
   8   3  -1  167.00   17.87
  -3  -8   1  147.39   17.07
  -8  -3  -1  133.01   15.48
  11  -3   1  126.25   16.46
   3 -11  -1  181.27   14.34
   8   3  -1  123.85   22.19
  -8  -3  -1  137.28   15.43
 -11   3   1  153.44   14.98
   8 -11   1  167.26   17.68
   8 -11   1  165.38   11.57
  -8  -3  -1  171.38   19.44
   3 -11  -1  149.83   17.58
  11  -3   1  169.15   18.99
   8   3  -1  179.23   17.44
 -11   8  -1  173.74   17.72
  11  -8  -1  156.62   26.73
   3   8   1  163.14   19.15
  -8  -3  -1  162.09   16.47
   8 -11   1  167.04   18.27
   8   3  -1  167.09   21.57
  -3  -8   1  148.49   16.20
   8   3  -1  162.24   15.05
   3 -11  -1  167.45   16.56
  11  -8  -1  124.56   25.33
 -11   8  -1  183.48   15.13
   3 -11  -1  144.28   21.73
  -8  -3  -1  144.90   31.31
 -11   3   1  150.43   21.90
   3   8   1  142.33   12.36
 -11   8  -1  162.59   14.04
  11  -3   1  190.81   22.63
   8   3  -1  143.50   17.61
   3   8   1  173.60   15.99
  11  -8  -1  152.65   15.88
   8 -11  -1  218.65   22.53
  -8  -3   1  145.55   21.89
   3   8  -1  171.15   20.65
   3 -11   1  160.52   23.20
  -8  -3   1  139.57   16.54
   8 -11  -1  108.57   20.35
   8 -11  -1  169.75   12.73
 -11   3  -1  151.89   15.32
   8   3   1  131.80   21.04
  11  -3  -1   98.46   17.31
  11  -8   1  122.84   26.73
  -3  -8  -1  131.48   16.54
   8 -11  -1  139.57   16.66
  11  -8   1  139.33   24.14
   3   8  -1  110.94   13.79
   8   3   1  114.53   15.84
   8 -11  -1  147.92   11.12
  11  -8   1  161.05   18.25
  -3  -8  -1  158.65   24.90
  11  -8   1  161.50   15.31
 -11   8   1  143.60   13.19
  11  -3  -1  223.44   23.78
  11  -3  -1  138.91   15.45
 -11   8   1  161.91   14.13
  -8  -3   1  158.00   15.69
 -11   3  -1  188.90   16.43
   8   3   1  143.74   13.42
  11  -3  -1  116.28   18.60
   8   3   1  151.68   16.47
  -3  -8  -1  154.54   19.90
  11  -8   1  165.60   18.62
 -11   8   1  131.15   15.79
   8   3   1  143.25   15.71
   8 -11  -1  173.44   24.04
   3   8  -1  148.36   13.05
  -8  -3   1  134.16   18.29
  11  -3  -1  166.77   18.44
   8   3   1  163.27   21.08
  -8  -3   1  176.43   17.37
   3 -11   1  148.66   13.10
 -11   3  -1  150.45   21.48
 -11   3  -1  132.86   18.81
   3 -11   1  147.87   17.90
  -3  -8  -1  145.76   17.07
   3 -11   1  121.05   18.70
   3 -11   1  146.46   13.64
  -9  -2  -1   16.20    9.68
  11  -9  -1   30.40   17.41
  -2  -9   1   11.53   10.63
   9   2  -1   17.69   10.09
   2   9   1   20.51    5.94
   2 -11  -1    4.86    7.30
   2 -11  -1   21.32    8.85
   9 -11   1   14.76   14.79
  -2  -9   1   29.17   17.57
  11  -9  -1   16.14    8.71
  11  -9  -1   19.82    8.88
   2 -11  -1   -7.07   13.87
 -11   2   1    6.41   13.94
 -11   2   1   14.67    9.32
  -9  -2  -1   11.54   12.85
 -11   2   1   13.95    9.62
   9   2  -1   21.12   16.35
   2 -11  -1   11.94    9.15
   2   9   1   19.92    9.44
  -2  -9   1   10.47   11.20
  -9  -2  -1   27.24   10.87
  -9  -2  -1   18.90   12.81
   9   2  -1   31.09   11.43
   2   9   1    4.76   11.94
   9 -11   1   15.43    6.79
   9 -11   1   25.29   11.68
   9   2  -1   18.03    7.52
  11  -2   1    5.94   13.91
   9 -11   1    5.52   10.01
   2 -11  -1   10.47   12.17
  -2  11  -1   16.40    7.91
   2 -11  -1    4.59   10.75
  -2  -9   1   20.36   10.80
 -11   9  -1   15.94    6.24
  11  -9  -1    0.20   13.37
 -11   9  -1   13.21   11.94
   9   2  -1   37.36   10.76
  11  -2   1   22.87   11.89
  11  -2   1    1.75   12.60
  11  -2   1   12.27   10.13
   9 -11   1   30.20   17.68
   2 -11   1   13.73   12.06
   9   2   1   12.34    7.75
   9 -11  -1   12.58   14.59
  -2  -9  -1   17.30    9.60
  -9  -2   1   29.90   10.20
 -11   9   1   27.14   11.46
  -9  -2   1   23.27   12.87
  -2  -9  -1   14.33   10.66
   2 -11   1    7.99    8.57
 -11   2  -1   16.53   13.65
  11  -2  -1    9.98   13.54
   9 -11  -1   -0.81   10.12
  -9  -2   1   -4.48    7.76
  -9  -2   1   24.07   11.06
 -11   2  -1   11.02   15.09
  11  -9   1   21.81    8.60
   9 -11  -1   19.41    6.32
  11  -9   1   28.18   17.45
  -2  -9  -1   13.17   11.37
  -9  -2   1    6.51    9.69
   2   9  -1    6.35    8.44
 -11   2  -1   -0.19    8.97
   9   2   1   -0.56    9.83
   2 -11   1   -0.07   12.04
   2   9  -1   22.54    6.70
  -2  -9  -1   39.70   16.81
   9   2   1    8.75    8.07
  11  -2  -1    6.68   11.50
   9 -11  -1    2.90    9.60
  11  -9   1   15.36    8.38
  -2  11   1   15.71    8.12
   2 -11   1   16.19   15.36
  11  -9   1    9.91   13.25
   9   2   1   14.06   10.22
   9 -11  -1   16.00    5.90
   9 -11  -1   23.46    6.74
   9 -11  -1   19.97   15.62
 -11   2  -1   20.12   10.02
   2   9  -1    5.78   11.93
  11  -9   1   35.46   11.90
   2 -11   1    4.97    7.14
   1 -11  -1    2.87   12.49
   1 -11  -1    5.03    7.92
  10 -11   1    7.98   11.01
  11 -10  -1   -1.86    7.40
 -11   1   1    7.57   22.51
  -1 -10   1   16.07   12.65
  -1 -10   1  -33.84   18.38
  -1 -10   1    4.71   10.61
 -11   1   1    7.84   13.08
 -10  -1  -1    4.07   10.60
  11  -1   1   -0.74    9.31
  10 -11   1   -3.10    9.54
 -10  -1  -1   10.99   11.72
   1  10   1    7.16    8.53
  10   1  -1   18.45    9.77
 -10  -1  -1   20.56   10.11
  10 -11   1   14.38   17.10
  10   1  -1   -6.39    9.55
  11  -1   1   10.91   14.43
 -11  10  -1   18.32   11.68
  -1 -10   1   12.46    9.35
  -1  11  -1   15.79    7.93
  11 -10  -1    6.77   13.24
   1  10   1    5.66    4.45
  11 -10  -1   10.92   10.18
  10   1  -1    8.83   10.98
   1  10   1   28.69   12.59
  10 -11   1    6.07    6.74
  10   1  -1    4.67   14.60
  10   1  -1   -3.36    7.89
   1 -11  -1   -0.37    9.14
 -10  -1  -1   -1.06    9.04
   1 -11  -1    9.08   15.22
  11  -1   1   -0.17   11.02
  11  -1   1   51.65   15.02
  11 -10  -1   22.19    8.19
  11  -1   1    2.41    9.44
  11  -1  -1    1.54    9.92
  10 -11  -1   15.45    6.67
  10   1   1   17.88   11.77
  10 -11  -1   12.84   11.41
  11  -1  -1   35.51   14.67
 -10  -1   1   -5.29    8.41
  -1 -10  -1  -20.44   18.66
  10   1   1   -0.16   14.81
  11  -1  -1    7.12   11.26
 -11   1  -1   -0.74    8.91
 -11   1  -1   -0.72    9.69
  11  -1  -1    1.06    9.79
  -1 -10  -1    8.65    9.40
 -10  11  -1   -0.35   10.04
 -11   1  -1   11.30   12.97
 -10  -1   1   12.02   12.46
 -10  -1   1   -2.56   14.62
   1  10  -1   13.72    8.37
  11 -10   1   -3.45   11.92
  -1 -10  -1    4.24   11.69
  10 -11  -1   30.77   16.72
  11 -10   1    7.41    7.68
   1 -11   1   -2.38   12.30
  11 -10   1    8.86    7.96
  11  -1  -1    2.86   15.01
  10 -11  -1    5.88    7.47
 -11   1  -1   -3.30   11.54
   1  10  -1   -1.45   11.29
   1 -11   1    8.10    8.06
  10   1   1    2.42    8.10
  11 -10   1    9.51   10.80
  -1 -10  -1    0.18    9.56
  10   1   1   14.64    9.41
  -1  11   1   20.22    8.57
   1 -11   1   18.59   17.06
  10 -11  -1    8.76    9.79
  10   1   1    4.70   10.38
 -10  -1   1    2.94    8.67
  11 -11   1   -2.18    6.96
   0 -11  -1  -38.76   17.05
 -11  11  -1   17.95   11.83
  11 -11   1   38.95   17.96
  11   0  -1   24.28   12.23
   0 -11  -1    4.54    9.15
   0  11  -1   15.49    8.88
 -11  11   1   -1.59   10.52
  11 -11  -1    1.44    6.89
  11   0   1  -41.75   19.72
  11   0   1   13.35    9.68
  11   0   1   14.40   12.20
 -11   0  -1   11.15   10.04
  11   0  -1   19.66   16.58
   0 -11   1   13.28   13.42
 -11   0  -1   10.51   13.11
   0  11   1    9.67    8.98
 -11   0   1    9.07    9.59
  11   0   1    4.00   15.66
  11 -11   1   -7.99   11.20
   0 -11   1    9.21    8.74
  11   0  -1  -47.04   19.15
 -11   0   1   13.91   14.35
  11   0  -1   -2.12    8.49
   0 -11  -1   -5.07   11.61
  11 -11  -1   10.66   11.97
  -6  -6  -1    4.30   10.44
  12  -6  -1  -20.77   12.65
   6 -12   1   -3.90   14.99
  12  -6  -1   20.95   15.14
   6 -12  -1   -5.13   12.15
  -6  -6  -1    3.12   10.22
 -12   6  -1    3.16   12.07
  -6  -6   1  -17.65    9.23
  -6  -6   1    1.14    9.94
   6   6   1   -3.65    9.90
 -12   6  -1   -5.36    7.54
 -12   6   1   -7.60    7.87
   6   6  -1   14.72    9.38
   6 -12  -1   12.43   11.11
   6   6  -1  -11.48   10.88
   6 -12  -1    7.43    5.43
   6   6  -1   -6.06    9.42
 -12   6   1   14.57    9.00
  -6  -6   1   -9.70    9.11
   6 -12   1  -21.13    8.07
  -6  -6   1   12.20   11.01
   6   6   1   -8.30   10.36
  12  -6  -1  -10.70   12.54
   6 -12   1    5.95   12.97
  -6  -6  -1   12.87   10.48
   6   6  -1   12.09    9.02
   6 -12  -1   -7.70    8.35
  12  -6  -1    2.39    9.18
  12  -6   1  -16.60   13.49
  12  -6  -1   -9.71    9.95
  -6  -6  -1    0.80   10.57
  12  -6   1    6.17    9.53
  12  -6   1    2.79   10.91
   6 -12  -1    2.98    6.44
   6   6   1    0.75   15.60
   6   6   1   -7.93    7.84
   6 -12   1    5.51    6.09
  12  -6   1    9.04   13.94
  12  -6   1   11.88   16.23
 -12   5   1  -26.26   13.41
  12  -7  -1    1.41   10.05
  12  -5   1  -17.44   10.27
   5 -12  -1  -10.11   14.46
 -12   7  -1   -8.61    7.12
  12  -7  -1    3.16    9.32
  -5  -7   1    0.10    9.31
  -5  -7   1    8.18   11.90
  12  -7  -1    1.07   13.97
  -5  -7   1   -8.90   10.14
   7 -12   1   -7.82   13.93
  12  -7  -1  -11.92    9.83
 -12   5   1   -0.31    8.37
   5 -12  -1    1.86    5.78
   5   7   1   -2.78   10.69
   5 -12  -1   11.52   11.67
   5   7   1   21.23   10.89
   7 -12   1  -10.38    8.82
  12  -5   1    8.07   12.01
  -7  -5  -1  -12.03    9.20
  -5  -7   1   -3.06    9.93
  12  -5   1    1.75   13.97
 -12   5   1   -6.22   15.08
   7 -12   1   -3.29    5.40
  12  -5   1   25.61   13.92
  -7  -5  -1    2.01   10.41
   5 -12  -1   -0.95    8.22
   7 -12   1   -3.12   11.72
   7 -12   1   -1.90   13.25
   7   5  -1    8.75   11.07
   7   5  -1   -7.14    7.63
  -7  -5  -1  -17.45    7.18
  12  -5   1    3.85    9.94
   7   5  -1    1.31    8.83
   5 -12  -1  -24.66   12.14
  12  -7  -1   10.73   16.66
   7   5  -1  -11.98   12.33
  -7  -5   1  -17.13    9.19
 -12   7   1    7.62    9.36
  -5  -7  -1   20.67   13.21
   5   7  -1   -1.76    9.40
  12  -7   1   -1.65    9.41
   7 -12  -1    9.61    8.37
  -7  -5   1   12.70   11.51
   5 -12   1   -4.42   16.19
   7 -12  -1    6.01   13.61
 -12   5  -1    1.89    8.49
  -7  -5   1   16.91   11.22
  -5  -7  -1   18.61   11.73
   7   5   1   -0.79    8.12
   7   5   1  -22.08   10.95
   7 -12  -1   -1.26    4.65
  12  -7   1    9.12   10.48
 -12   7   1   -3.14    7.71
  -5  -7  -1   13.65   11.97
  12  -7   1    5.46    9.64
   7 -12  -1    1.76   14.11
  12  -5  -1   22.09   14.38
  12  -7   1    5.79   15.35
  -5  -7  -1    7.72   10.61
   7 -12  -1   -0.67    9.09
   7   5   1   -2.17   10.06
   7   5   1  -12.57   10.37
  12  -5  -1   -1.59   13.61
   5 -12   1    7.41   11.36
  12  -5  -1   -2.93   10.57
   5   7  -1  -17.70   10.39
   5 -12   1   -6.36    7.83
  12  -5  -1   -0.84   11.23
   7 -12  -1    2.24    7.29
   7 -12  -1    3.92   10.80
  12  -5  -1    8.64    9.58
  12  -7   1    4.05   13.68
 -12   5  -1   -4.01   11.44
   5 -12   1    1.11    6.07
 -12   4   1   67.04   17.97
   8   4  -1   45.08   12.95
  12  -8  -1   53.65   12.83
  -8  -4  -1   35.58   11.63
  12  -4   1   50.08   16.32
   8   4  -1   59.43   10.65
  -8  -4  -1   59.99   14.69
   8 -12   1   29.79   17.28
  12  -8  -1   60.85   12.28
  -8  -4  -1   37.24   10.82
   4 -12  -1   49.46    8.48
  12  -4   1   47.48   15.00
   8   4  -1   21.94   15.19
  -4  -8   1   54.89   15.58
 -12   4   1   55.17   18.10
  12  -4   1   91.61   17.28
  12  -4   1   45.14   11.79
  -4  -8   1   70.70   14.05
 -12   4   1   50.80   12.13
 -12   4   1   57.70   13.62
   8 -12   1   44.24   12.48
   4   8   1   38.39   14.47
   4   8   1   43.27   11.77
   8   4  -1   69.30   13.71
   8 -12   1   50.34    7.76
   4 -12  -1   61.82   19.40
   4 -12  -1   63.03   15.37
  12  -8  -1   76.92   13.31
  -4  -8   1   44.73   11.73
  12  -8  -1   53.86   16.87
  -4  -8   1   42.51   13.25
 -12   8  -1   38.90   12.58
  12  -4   1   48.80   16.26
 -12   8   1   41.98    9.94
   8   4   1   43.15   10.29
  -8  -4   1   64.81   15.40
  12  -4  -1   88.03   17.92
  -4  -8  -1   62.71   13.09
  12  -4  -1   41.64   15.39
 -12   4  -1   48.53   11.11
 -12   8   1   67.82   13.32
  -8  -4   1   47.35   12.44
   4   8  -1   54.42   12.96
  -4  -8  -1   54.18   13.39
   4 -12   1   55.37   24.53
  12  -4  -1   57.83   12.68
   8 -12  -1   72.29   19.83
   8   4   1   31.91   15.18
 -12   4  -1   85.83   15.90
  12  -8   1   59.91   13.16
  12  -8   1   53.93   16.80
 -12   4  -1   54.57   11.98
  -8  -4   1   63.02   12.38
   8 -12  -1   59.66    7.85
  12  -8   1   52.47   12.06
   8 -12  -1   55.10   12.81
   4 -12   1   50.59    8.80
   8   4   1   65.64   13.85
   4 -12   1   48.93   14.68
  -4  -8  -1   82.48   16.29
  12  -4  -1   91.62   26.42
   8 -12  -1   50.50   12.62
  12  -8   1   61.37   12.02
  12  -4  -1   39.86   13.67
  -4  -8  -1   45.91   13.34
 -12   4  -1   69.48   32.48
   4   8  -1   42.84   14.09
 -12   3   1    6.62   14.73
  12  -3   1   20.42   12.33
  12  -3   1   11.62   10.28
  12  -9  -1   18.40   10.01
   9 -12   1   -2.71    5.64
 -12   3   1   -4.83   11.12
   3   9   1   -7.01    8.99
 -12   3   1   19.96   22.04
  12  -9  -1    1.74   13.61
  12  -3   1   32.89   13.21
   3 -12  -1   12.30   12.79
 -12   3   1   19.55    9.77
  -9  -3  -1    5.44   10.10
  12  -3   1   -7.21   13.31
  -3  -9   1    1.26   11.38
  -3  -9   1    0.96   11.65
   3 -12  -1    3.39    6.98
  -9  -3  -1    2.68    9.94
  12  -9  -1   10.39   10.00
 -12   9  -1   -9.78   10.28
   9 -12   1  -12.02   14.81
   9   3  -1   -5.26    7.13
  12  -3   1   10.66   12.85
  -3  -9   1   10.31   11.52
  12  -9  -1    5.48    9.19
  -3  -9   1   29.30   14.49
   9 -12   1   -7.02    9.95
   9   3  -1    1.19   10.21
  -9  -3  -1    3.31   11.10
   3 -12  -1   -8.77   14.82
   3   9  -1  -13.55   10.68
 -12   3  -1    5.92    9.43
  -9  -3   1    0.74   10.59
  -9  -3   1   11.81   12.40
 -12   9   1   11.66   11.40
 -12   3  -1    1.94    9.49
   3 -12   1   -5.25    6.67
  12  -9   1   -2.62    8.22
  12  -3  -1    5.77   10.34
   3   9  -1   -4.18   11.63
   9   3   1   -3.30   10.27
  12  -3  -1    8.27   13.29
  -3  -9  -1   -1.23   11.08
   9 -12  -1  -12.20   13.72
 -12   3  -1   -5.12   12.34
  12  -9   1   -3.70   13.91
  12  -3  -1  -13.66   20.71
  12  -9   1  -13.40    9.17
  -9  -3   1   -4.98    8.97
   3 -12   1   -9.64   12.47
  -3  -9  -1   20.93   13.24
   3 -12   1   -8.69   16.72
  12  -9   1    2.66    9.00
 -12   3  -1   -0.09   18.62
  -3  -9  -1   -5.72   11.15
   9   3   1    2.90    8.38
  -3  -9  -1   -2.89   10.25
   9 -12  -1   -5.66   13.99
   9 -12  -1    4.08    5.18
  12  -3  -1    4.92   11.84
  12 -10  -1    9.06   13.76
  -2 -10   1   -3.59   10.91
 -12   2   1   12.97    9.54
  -2 -10   1   -8.09   11.86
  12  -2   1   54.89   15.76
  10   2  -1    9.16   11.89
 -10  -2  -1    5.45   12.29
   2 -12  -1  -12.21   12.83
  12  -2   1   26.86   12.92
 -12   2   1   28.16   15.80
  -2 -10   1   31.50   17.72
  10 -12   1   15.62   17.51
   2 -12  -1   -5.70   19.13
  10   2  -1    2.58   10.43
   2 -12  -1   11.30    8.00
 -10  -2  -1   15.32   10.28
 -10  -2  -1    3.20    9.06
  -2 -10   1    6.79    9.78
  -2  12  -1    2.90    7.58
   2  10   1   12.66    9.74
 -12  10  -1   25.85   12.77
  12  -2   1    7.75   13.79
  10 -12   1    7.33   11.14
  12 -10  -1   11.18    8.67
  10 -12   1    9.54    6.66
  -2 -10  -1   34.01   11.00
  10   2   1   11.01   11.69
  12 -10   1   13.25    9.25
  12  -2  -1   -2.79   13.03
  -2 -10  -1   -6.74   11.76
  10 -12  -1   22.59   11.81
  10 -12  -1    8.15    6.16
  -2 -10  -1   16.78   12.07
   2 -12   1   10.18    8.38
  12 -10   1    9.64   14.03
 -10  -2   1    7.25   12.72
   2 -12   1   20.65   13.61
  10 -12  -1   22.37   17.12
 -10  -2   1   19.09   12.04
 -12   2  -1    3.79   13.49
 -12   2  -1   18.49   10.24
 -12  10   1    5.47   11.45
 -10  -2   1   21.02   10.08
  -2 -10  -1    9.10   15.60
  12  -2  -1   28.28   16.28
  12  -2  -1   17.60   13.19
 -12   2  -1    0.89   13.65
   2 -12   1    5.18   17.28
  10   2   1    5.97    9.25
  12  -1   1   -3.29   11.92
  -1  12  -1   14.76    9.13
  12  -1   1  -12.93   10.06
  -1 -11   1   12.73    9.70
   1 -12  -1   -5.39   12.99
 -12  11  -1   14.08   12.54
   1  11   1   11.91    9.53
  12 -11  -1    2.48    7.85
  11 -12   1   -1.16   10.78
  11 -12   1    3.41    7.10
  -1 -11   1  -32.28   11.77
   1 -12  -1  -43.91   17.92
   1 -12  -1   10.15    8.71
  11   1  -1  -16.19   10.61
  -1 -11   1  -37.61   21.01
 -12   1   1   16.59   10.29
 -11  -1  -1    5.23   10.06
  12 -11  -1   -9.51   12.65
 -12   1   1    3.15   14.19
  11 -12   1    6.27   17.72
   1 -12   1   10.16    8.85
   1 -12   1  -35.53   18.34
  12  -1  -1   -6.97   10.23
  -1 -11  -1    7.80    9.93
  -1 -11  -1  -42.82   19.97
  -1 -11  -1   -4.86   13.17
   1  11  -1   14.34   10.71
 -11  -1   1    2.19    9.93
  12  -1  -1   -4.70   14.91
  11 -12  -1  -21.73    9.36
  -1  12   1   -2.17    8.25
  12 -11   1   -0.08    7.90
  11 -12  -1    8.69   17.37
  12  -1  -1   -0.65   11.97
 -12   1  -1   -0.12   13.58
 -11  -1   1   36.44   15.47
  11 -12  -1   10.31    6.98
   1 -12   1  -15.96   13.05
  11   1   1  -15.05   10.88
 -12  11   1  -19.64   10.28
  12 -11   1  -17.01   11.65
 -12   1  -1   -3.05    9.35
  12 -12  -1    6.51   18.06
  12 -12   1    7.89   18.21
  12 -12   1   -5.76    7.56
 -12  12   1  -21.91    9.69
 -12  12  -1  -16.13   10.93
   0 -12   1   -9.82   14.08
 -12   0   1   -6.58    9.67
  12   0   1   -8.75   11.58
 -12   0   1    1.40   14.48
  12 -12   1  -14.73   10.76
   0  12  -1    0.14    8.25
  12   0  -1   20.19   13.43
   0 -12  -1    7.56    9.33
   0  12   1   -4.99    9.17
   0 -12  -1   -6.84   13.65
  12 -12  -1   -4.41   11.16
 -12   0  -1   -0.64    9.92
   0 -12   1    8.86    9.34
 -12   0  -1   10.95   14.07
  12 -12  -1   -9.33    7.01
   6 -13  -1   61.65   20.93
  13  -7  -1   52.21   13.97
 -13   7  -1  101.73   15.00
   6   7   1   79.76   15.15
 -13   6   1   65.32   12.52
  13  -7  -1   79.39   19.54
  -6  -7   1   85.89   16.54
   6 -13  -1   74.46    8.90
  -6  -7   1   89.78   15.63
  13  -6   1   70.53   20.49
   6 -13  -1   87.24   16.16
  -7  -6  -1   95.39   15.61
   7 -13   1   50.38   12.67
   7 -13   1   89.94    9.76
 -13   6   1   85.70   13.38
  -7  -6  -1   66.08   14.48
   7 -13   1   92.05   23.87
  13  -7  -1  116.23   16.80
  -7  -6  -1   78.34   16.05
  13  -6   1   75.59   16.14
   7   6  -1   78.83   14.81
  -6  -7   1   98.44   15.88
  -7  -6   1   83.72   15.73
  13  -6  -1   57.34   18.85
  -6  -7  -1   95.94   15.99
  13  -7   1   91.33   16.95
  13  -6  -1   79.40   15.95
  13  -7   1   89.13   19.84
  13  -6  -1   95.39   17.30
   7   6   1   74.57   15.29
  13  -7   1   68.13   14.31
   6 -13   1   82.06   15.66
 -13   6  -1   69.07   12.63
 -13   7   1   85.55   13.80
   7 -13  -1   68.68   13.23
   7 -13  -1   83.89   21.78
  -6  -7  -1   88.76   15.70
   6 -13   1   74.49    9.60
   6 -13   1   93.74   22.08
 -13   6  -1  112.31   14.75
   7 -13  -1   97.75    9.22
  -7  -6   1   75.76   14.58
   6   7  -1  104.27   15.80
  -6  -7  -1   95.47   16.64
  -7  -6   1  106.50   18.29
   8   5  -1   23.21   12.48
  -5  -8   1   34.34   13.62
   5 -13  -1   -5.58   15.86
   8 -13   1    9.89   10.45
   5 -13  -1   30.81   14.40
  13  -5   1   18.03   13.23
  13  -8  -1   32.66   12.02
  -8  -5  -1   22.58   12.75
  -5  -8   1   11.18   11.82
 -13   5   1   28.99   18.53
  13  -5   1    3.98   12.40
  13  -5   1    1.92   14.97
   8 -13   1   18.07    6.56
 -13   5   1   27.97   10.72
   5 -13  -1   15.37    6.57
   5   8   1   27.20   11.79
  13  -8  -1    6.85   15.04
  -8  -5  -1   20.02   11.83
 -13   8  -1   27.14   12.00
  13  -8  -1    4.72   10.15
  -8  -5  -1   17.48   12.57
   8 -13   1    0.83   16.56
  -5  -8   1   28.77   12.26
   5 -13   1   40.55   15.20
  -5  -8  -1   27.38   12.49
   8 -13  -1    6.29   16.31
   8   5   1   27.39   12.70
 -13   5  -1    0.53    9.84
  13  -8   1   15.98   16.11
  13  -8   1   29.26   12.52
  13  -5  -1   39.83   14.94
  13  -5  -1   15.55   15.63
  -8  -5   1   35.69   11.91
   8 -13  -1   12.71    5.72
  -5  -8  -1   41.21   14.19
   8 -13  -1    3.39   10.10
  -8  -5   1   24.72   13.76
   5 -13   1    9.29    6.96
 -13   5  -1    9.66   10.22
  13  -8   1   18.10   10.98
  -5  -8  -1   14.30   12.78
 -13   8   1   27.08   11.57
  13  -5  -1   20.70   13.62
   5 -13   1    8.07   16.83
  -8  -5   1   21.62   11.43
   5   8  -1   19.12   11.60
   4 -13  -1   -0.45    6.80
  -9  -4  -1   -0.06   11.03
  13  -9  -1   -2.64    9.06
   9   4  -1   -6.44   11.15
   4   9   1    8.49   11.01
  -9  -4  -1   -9.83    9.80
 -13   4   1   13.21    9.85
  13  -9  -1  -19.80   12.92
  13  -9  -1   -1.11    9.56
 -13   9  -1    4.37   11.18
   9 -13   1    8.78   16.52
  -4  -9   1    1.43   12.19
  -4  -9   1   -2.35   10.33
  13  -4   1  -10.29   12.36
   9 -13   1    1.92   10.23
  13  -4   1   -3.04   13.01
 -13   4   1    4.34   16.20
   9 -13   1   -0.02    5.69
  -4  -9   1   14.19   13.48
   4 -13  -1  -10.93   15.50
   4 -13  -1   -2.18   13.13
  13  -4   1   14.52   14.02
  -9  -4  -1    0.16   11.59
 -13   4  -1   14.59   10.75
   4 -13   1   14.85   17.82
   4   9  -1    1.20   10.17
  -9  -4   1   -9.05    8.33
   9   4   1  -10.72   11.53
 -13   4  -1   23.41   16.92
  -4  -9  -1   -7.96   10.52
   4 -13   1  -10.35    6.73
  -9  -4   1  -16.73    9.18
   9 -13  -1    0.97    9.63
  13  -9   1  -13.56    9.04
   9 -13  -1    6.15   15.92
  -4  -9  -1   -5.18   12.14
   9 -13  -1    4.57    5.25
   4 -13   1   17.49   14.04
  13  -4  -1   -3.71   13.90
  13  -4  -1   23.91   14.63
 -13   9   1   26.88   12.27
  -9  -4   1   10.05   14.57
  13  -4  -1   -5.16   11.86
  13  -9   1   10.30   15.19
 -10  -3  -1   33.06   15.02
  -3 -10   1   26.62   14.18
 -13  10  -1   24.41   13.15
  10 -13   1   31.72    7.87
  13  -3   1   10.99   14.20
 -13   3   1   57.57   12.73
  13 -10  -1   31.79   11.12
  10   3  -1   33.68   12.72
   3 -13  -1   44.21   17.18
 -13   3   1   24.68   17.15
  10 -13   1   41.00   20.23
   3  10   1   29.82   11.22
  -3 -10   1   27.98   13.50
 -10  -3  -1   40.80   12.29
  -3 -10   1   66.41   18.58
  10 -13   1   28.89   12.13
  13  -3   1   24.33   27.87
   3 -13  -1    9.73   18.78
   3 -13  -1   36.71    9.11
  13 -10  -1   46.56   17.21
  13  -3   1   36.65   16.10
  -3 -10  -1   65.39   18.80
   3  10  -1   31.25   11.32
 -13   3  -1   31.88   18.17
  10 -13  -1   35.42    7.06
  13  -3  -1   32.05   16.19
  13 -10   1   26.05   10.83
 -10  -3   1   18.41   11.37
  13  -3  -1   18.82   15.07
  13  -3  -1   19.07   14.13
   3 -13   1   20.69   15.74
 -10  -3   1   45.80   16.24
 -13  10   1   33.20   13.44
  10   3   1   37.26   14.21
  -3 -10  -1   26.18   11.94
  13 -10   1   16.18   15.54
   3 -13   1   34.22    9.39
 -13   3  -1   50.30   12.41
  -3 -10  -1   47.10   14.94
  10 -13  -1   38.31   12.58
  10 -13  -1   25.73   17.75
   3 -13   1   30.02   20.68
 -13   2   1    0.94   15.10
  -2 -11   1   31.69   18.46
   2  11   1   11.65   10.19
  13  -2   1   -7.80   12.98
 -13  11  -1   12.39   12.63
  -2 -11   1  -17.19   13.30
  11 -13   1    0.95   17.79
 -11  -2  -1   -5.98   13.15
  13  -2   1  -35.14    9.99
  13 -11  -1   -7.51    8.03
   2 -13  -1   18.08    9.49
   2 -13  -1   -3.19   14.68
  13 -11  -1   -1.42   13.93
  -2 -11   1   29.65   11.39
 -13   2   1    7.54   10.20
   2 -13  -1  -37.85   17.90
  11   2  -1   -5.71   11.31
 -11  -2  -1    9.99   10.68
  11 -13   1    5.93    6.62
  11 -13   1  -17.78    9.64
   2 -13   1    1.23    8.11
  -2 -11  -1   -0.34   12.87
   2  11  -1    1.41    9.69
 -11  -2   1   15.47   10.73
  11 -13  -1  -13.85   16.71
 -13   2  -1    4.34   15.13
  13 -11   1   -6.44   13.70
 -13  11   1   -1.73   11.46
  11 -13  -1  -11.93   10.42
 -13   2  -1   13.80   11.09
  11   2   1   -7.62   12.29
 -11  -2   1   -5.19   12.68
  13  -2  -1  -35.01   11.32
   2 -13   1    4.99   15.29
  13 -11   1    6.40    9.26
  -2 -11  -1   -5.95   10.17
  11 -13  -1   -1.33    5.98
  13  -2  -1   -7.10   11.61
  -1 -12   1   27.91   11.34
  12   1  -1    8.29   13.20
 -13   1   1   18.68   16.88
   1 -13  -1   22.54   17.53
  -1 -12   1    1.99   15.65
 -13   1   1   24.43   11.49
 -13  12  -1    1.05   12.38
  13 -12  -1   28.03   15.36
  13  -1   1  -18.96   12.72
  13 -12  -1   17.87    9.25
 -12  -1  -1   30.90   12.25
  12 -13   1   19.17   13.15
  12 -13   1   41.85   22.24
   1 -13  -1   18.16    9.72
   1  12   1   14.37   10.47
  12 -13   1   19.57    8.59
 -12  -1   1   32.72   16.15
  13  -1  -1    6.74   14.56
 -13   1  -1   23.49   16.76
  13 -12   1   14.39    9.48
   1 -13   1   29.66   10.66
   1 -13   1   21.48   17.30
  -1 -12  -1   -1.82    9.47
 -13  12   1   14.31   12.61
  12 -13  -1   -3.12   11.50
  12 -13  -1   24.64   21.32
  12 -13  -1   19.78    7.77
 -13   1  -1   10.20   10.73
 -12  -1   1   37.65   12.18
  -1 -12  -1   12.77   15.95
   1  12  -1   34.39   11.84
  12   1   1   13.14   14.67
  13 -12   1   41.75   21.31
  13 -12   1    9.71   14.13
   0 -13  -1  -16.70   14.67
   0 -13  -1    9.23    9.86
  13   0  -1   -7.76   13.49
  13 -13  -1    7.31    8.18
  13 -13  -1   13.81   20.88
  13 -13   1  -19.09   17.58
  13 -13   1  -10.82    7.85
 -13   0  -1    3.31   11.14
 -13   0   1   11.29   11.00
  13   0   1  -10.11   13.34
   0 -13   1   12.72   10.51
   0 -13   1   10.51   15.84
 -13   0   1    4.12   14.97
  14  -7  -1  -14.84   12.16
  -7  -7   1   -5.99   11.97
   7 -14   1   34.65   13.34
  14  -7  -1   18.69   12.82
   7 -14  -1  -18.07   15.23
  -7  -7   1   11.92   12.52
  14  -7   1    9.96   12.31
   7 -14  -1   -1.91    5.39
   7 -14  -1   -4.38   12.31
 -14   7   1   -4.10    9.91
  14  -7   1  -23.75   10.61
   7 -14   1  -16.84   16.20
 -14   7  -1   21.95   11.15
  14  -7   1   -9.44   16.66
   7   7  -1   -4.09   11.09
   7   7   1    1.53   12.25
   7 -14   1    7.48    6.33
  -7  -7  -1    4.22   11.40
  14  -7  -1  -24.61   14.12
  -7  -7  -1   14.86   12.06
 -14   6   1   -7.20    9.53
   6 -14  -1    1.70   13.42
  14  -8  -1  -14.76   14.83
  14  -6   1  -27.83   11.42
  14  -6   1    0.13   13.05
  14  -6   1  -10.72   15.97
   8 -14   1    4.35    6.42
 -14   8  -1   18.00   11.89
  -6  -8   1   16.04   12.34
  -8  -6  -1   11.09   12.07
   6   8   1   -3.77   11.32
  -8  -6  -1   16.29   12.09
   8 -14   1  -20.24   15.57
   6 -14  -1    7.08    6.27
  -6  -8   1   10.58   12.57
  14  -8  -1    2.90   11.63
   6 -14  -1  -10.50   16.04
  14  -8  -1   10.81   11.40
   8   6  -1    7.61   12.80
 -14   8   1    8.06   11.25
   6 -14   1    5.06    6.57
  14  -8   1  -11.57   10.74
  14  -6  -1  -12.69   12.28
  -8  -6   1  -11.82   10.65
  -6  -8  -1  -11.31   10.91
   6 -14   1   44.36   15.18
  -8  -6   1   12.00   10.83
  14  -8   1    7.34   16.47
   8 -14  -1  -23.00   14.81
   8   6   1  -19.21   11.27
   8 -14  -1    6.43    5.50
  14  -6  -1  -13.63   12.22
 -14   6  -1    8.09   10.57
  -6  -8  -1   11.43   12.64
   6   8  -1  -15.55   11.42
  14  -6  -1   -5.53   15.28
   6 -14   1  -11.43   16.67
  14  -9  -1   34.76   13.18
   5 -14  -1   27.92    7.87
 -14   5   1   14.43   18.50
 -14   5   1   16.03   11.36
  -9  -5  -1   15.33   13.21
   9   5  -1   28.04   14.02
 -14   9  -1   35.47   13.67
  14  -5   1   19.48   14.68
  14  -5   1    4.01   16.06
   9 -14   1   27.55   13.30
   5 -14  -1   18.07   18.41
  -9  -5  -1   23.52   12.24
  14  -9  -1   -1.11   16.59
   5   9   1   31.80   13.16
  -5  -9   1   32.48   14.43
   9 -14   1   21.91   18.79
   9 -14   1   24.92    7.31
  -5  -9   1   10.32   12.59
  14  -5   1    8.99   14.39
   5 -14  -1   22.01   15.24
  14  -5  -1   30.82   15.18
   5 -14   1   25.28   20.32
   9 -14  -1   23.72    6.27
  14  -5  -1   18.88   14.82
   5 -14   1    9.93   14.76
   5 -14   1   25.96    8.29
 -14   5  -1   29.41   12.27
   5   9  -1   35.67   13.31
  -5  -9  -1   35.59   13.87
   9 -14  -1   -1.01    9.99
  14  -9   1   17.28   12.23
  -9  -5   1   28.03   12.50
  14  -9   1  -19.48   15.53
  -5  -9  -1   -5.23   12.61
   9   5   1   33.81   14.46
   9 -14  -1   -1.45   15.77
  14  -5  -1    4.40   16.18
 -14   9   1   16.87   12.21
  -9  -5   1   23.79   12.74
   4  10   1   -0.06   11.10
 -10  -4  -1   -1.00   10.84
  10 -14   1   -7.37   16.28
  -4 -10   1    1.07   13.82
  10 -14   1   -5.36    5.76
  14  -4   1   -8.18   14.58
   4 -14  -1   -2.06    6.90
  14  -4   1   -6.08   13.91
 -14   4   1    3.43   10.42
   4 -14  -1  -25.34   16.77
   4 -14  -1   -4.62   14.82
  10   4  -1  -10.02   12.11
  14  -4   1    5.97   14.95
  10 -14   1   -4.77   10.90
  14 -10  -1  -16.88    9.23
  14 -10  -1  -26.03   14.05
 -14  10  -1   11.00   12.50
  -4 -10   1   -3.70   11.01
 -14   4   1    6.06   17.51
  14  -4  -1    9.18   14.15
  14 -10   1  -14.71    9.90
  14  -4  -1  -12.22   13.69
  10 -14  -1    4.33   10.48
  10 -14  -1    4.38    5.31
   4 -14   1   -2.08    7.05
  -4 -10  -1   12.11   13.16
 -10  -4   1   11.48   11.22
  14  -4  -1   -4.98   14.24
  -4 -10  -1   13.05   12.03
  10   4   1    3.69   13.45
   4 -14   1   -2.23   14.90
 -14  10   1   -9.62   11.25
   4 -14   1  -30.78   17.47
  10 -14  -1  -30.38   13.58
 -14   4  -1   14.46   10.74
  14 -10   1    2.72   15.98
   4  10  -1   11.59   11.17
 -14   4  -1    6.86   16.61
  11 -14   1   -1.97   12.13
  14  -3   1    5.01   15.37
  -3 -11   1   19.10   12.26
 -11  -3  -1    7.04   11.03
 -14   3   1   16.00   11.38
  11   3  -1  -15.63   16.26
 -14   3   1    6.39   16.49
  -3 -11   1    3.94   20.03
  14  -3   1  -10.29   13.66
 -14  11  -1   -1.54   12.22
  14 -11  -1   14.74   18.36
  14 -11  -1  -11.98   20.60
   3  11   1   17.19   11.68
  11 -14  -1   62.84   37.21
   3  11  -1   -6.95   10.74
  11   3   1   24.51   17.76
  14  -3  -1   10.96   15.00
 -14   3  -1   34.64   19.28
   3 -14   1   10.81   15.26
  -3 -11  -1   20.72   17.80
 -11  -3   1   10.89   11.25
  -3 -11  -1   19.99   12.77
  14 -11   1   -1.06   16.61
  11 -14  -1   -4.42   10.68
   3 -14   1   -4.13   29.30
  14  -3  -1   15.27   15.12
 -14  11   1   -5.76   11.82
  14 -11   1    3.78   27.01
  11 -14  -1    7.81    6.80
 -14   3  -1   21.61   11.81
 -14   2   1    7.48   10.63
  14 -12  -1   -0.79   15.02
   2  12   1   28.06   12.06
  12 -14   1   -6.73   11.50
  14 -12  -1   11.10   10.16
  12   2  -1   -9.77   14.73
 -12  -2  -1   11.36   20.94
  -2 -12   1   -5.22   10.07
  12 -14   1    9.99   20.73
   2 -14  -1    8.95    8.30
 -14  12  -1   13.50   13.80
  12 -14   1   -3.03    6.91
   2 -14  -1  -15.80   16.52
 -14   2   1  -16.49   15.90
  14  -2   1  -35.60   15.52
  -2 -12   1   -1.22   14.12
  14 -12   1  -11.76   14.29
  12 -14  -1   18.52   19.67
  12 -14  -1  -11.63   11.32
 -12  -2   1  -10.84   11.63
 -14  12   1   -9.25   12.19
  -2 -12  -1   21.62   12.37
   2 -14   1    0.84    8.26
  14 -12   1   -2.62    9.60
  14  -2  -1  -14.21   13.98
 -14   2  -1   12.88   16.83
  -2 -12  -1  -22.51   13.07
  14 -12   1   31.78   21.61
  12   2   1   -1.44   14.56
   2 -14   1   -0.86   15.98
 -14   2  -1   11.46   12.56
  12 -14  -1   -6.14    6.10
  15  -7   1   20.06   14.83
  -8  -7  -1   18.54   13.28
  -7  -8   1   12.88   13.83
 -15   8  -1   21.96   13.05
 -15   7   1    7.67   11.69
   7 -15  -1    7.08   15.28
   8   7  -1   22.02   14.86
   8 -15   1   34.33   13.89
  -7  -8   1   31.44   13.94
  15  -7   1   -5.17   19.94
   7 -15  -1   -1.09   18.46
   8 -15   1   18.26    6.82
  15  -8  -1   20.47   15.13
   8 -15   1   25.77   30.64
   7   8   1   32.02   21.19
  -8  -7  -1   16.90   13.55
  15  -8  -1    6.37   16.89
  15  -8   1   16.69   18.38
  15  -7  -1    1.81   19.78
 -15   8   1   14.68   12.61
   7 -15   1   14.34    6.97
  15  -7  -1   -7.38   12.50
   8 -15  -1   36.37   24.93
  -8  -7   1    0.40   12.20
  -8  -7   1   -2.08   15.18
  -7  -8  -1   29.79   14.51
  15  -8   1    9.15   13.15
  -7  -8  -1   24.27   13.58
   7 -15   1   29.71   15.38
   7 -15   1   -2.91   18.42
  15  -7  -1  -12.75   16.70
   8   7   1   32.72   14.70
 -15   7  -1    5.26   11.30
   8 -15  -1  -18.87   16.53
   9 -15   1   -1.42    6.06
  -6  -9   1    0.34   11.95
   6 -15  -1    5.03    5.90
  -9  -6  -1    9.37   12.12
  15  -9  -1  -33.01   14.68
  -6  -9   1   -2.51   12.62
 -15   6   1    1.97   11.09
  15  -9  -1   10.97   13.35
  15  -6   1  -12.99   13.40
   9   6  -1   10.72   14.18
   6 -15  -1  -20.68   18.05
  15  -6   1   -1.05   13.00
   9 -15   1  -11.10   16.76
 -15   9  -1    8.05   12.60
   6 -15  -1   15.32   14.64
 -15   9   1    0.34   12.14
  15  -6  -1  -15.66   13.10
   6   9  -1    9.73   16.90
 -15   6  -1   -4.52   10.49
  -9  -6   1    5.78   14.93
   6 -15   1   23.53   15.14
  15  -9   1   -6.66   16.20
   9   6   1   -0.94   12.98
  -6  -9  -1    5.50   12.38
   6 -15   1    5.92    6.87
  15  -6  -1   12.18   14.94
   9 -15  -1    5.85    6.37
   6 -15   1  -32.59   16.98
  -6  -9  -1    3.49   12.78
  15  -9   1   -3.89   16.36
   0  -1  -2   64.50    3.75
  -1   0  -2   68.69    4.94
   0  -1   2   69.89    6.73
   0   1   2   57.39    4.62
   0   1  -2   59.27    5.93
   1   0  -2   53.43    5.73
  -1   1   2   47.28    4.85
   1   0   2   56.32    5.92
   1  -1   2   67.86    5.67
  -1   1   2   59.16    7.73
  -1   0  -2   72.94    5.94
   1  -1   2   65.56    2.92
   1   0   2   59.63    4.68
   1   0  -2   66.12    5.29
   0  -1   2   68.46    5.69
   1  -1  -2   71.81    4.38
   0  -1  -2   71.27    4.49
   0  -1  -2   65.01    5.03
   0  -1   2   70.37    4.00
   1   0   2   68.88    4.86
  -1   1  -2   61.91    4.99
   1   0  -2   70.97    4.59
   1   0   2   63.31    4.76
   0  -1  -2   57.10    4.35
   1  -1  -2   59.13    3.23
   0   1   2   61.49    3.29
  -1   1  -2   60.40    6.60
  -1   0  -2   62.26    4.85
  -1   1  -2   65.25    5.48
   1   0  -2   64.26    3.48
  -1   0   2   54.60    4.84
   0  -1  -2   66.90    4.15
   1  -1  -2   71.32    5.77
   2  -1   2   23.00    5.20
   2  -1   2   22.18    3.43
   1   1   2   32.03    4.05
   1   1   2   21.57    3.85
   2  -1  -2   26.21    3.45
  -2   1  -2   38.94    5.09
  -2   1  -2   26.36    3.40
   1  -2   2   33.55    2.83
  -1  -1   2   33.02    4.68
  -2   1  -2   26.39    4.50
   1  -2   2   27.86    4.30
   1   1  -2   34.41    6.43
   2  -1  -2   32.33    5.02
  -1  -1   2   24.67    3.93
  -1  -1  -2   28.65    4.50
  -2   1  -2   37.15    6.00
   1  -2   2   33.93    5.76
  -1   2  -2   28.64    4.15
  -1   2  -2   29.32    2.22
  -1   2  -2   32.48    3.70
   2  -1   2   28.58    6.34
   1   1  -2   33.24    3.95
  -1  -1   2   24.48    4.03
   1  -2  -2   30.83    4.44
  -1   2  -2   27.75    6.12
  -1  -1  -2   33.22    5.06
   1  -2  -2   25.60    4.64
   2  -1   2   24.42    4.20
   1  -2   2   31.42    6.64
   1   1  -2   26.20    6.48
  -1  -1  -2   31.48    4.10
  -1  -1   2   33.03    7.24
   1   1   2   31.34    3.75
   1   1  -2   23.86    2.90
   2  -1  -2   29.31    3.09
  -1  -1   2   28.43    5.86
   1  -2   2   29.07    3.93
  -2   1   2   30.68    5.23
   2  -1   2   34.23   10.89
   2  -1  -2   28.12    5.29
  -2   1   2   35.74    4.57
  -1   2  -2   24.81    5.85
  -2   1   2   28.35    3.48
  -1  -1  -2   39.64    4.16
  -2   1   2   29.65    6.41
   1   1   2   32.76    3.55
   2  -1  -2   21.20    5.59
  -1  -1  -2   32.43    5.50
   1   1   2   23.54    4.54
   1   1  -2   26.40    4.13
  -1   2  -2   29.86    4.25
   1   1  -2   31.74    4.99
   2  -2   2  129.41    8.93
   0   2   2  117.34    6.90
  -2   0   2  111.31    8.02
  -2   2  -2  142.03    9.83
   0  -2   2  116.48    6.85
  -2   0  -2  100.14    8.47
   2   0  -2   99.41   10.44
   2   0   2  121.24    8.17
   0   2   2  113.78    8.42
   0   2   2  114.57    5.66
   0  -2  -2  131.09    8.11
   2  -2  -2  125.72    8.24
  -2   2   2  110.62    9.10
  -2   0   2  117.83    8.34
   2   0   2  127.20    8.89
   2   0   2  116.82    8.26
   0   2  -2  132.12   10.43
   0  -2  -2  108.47    6.23
   0  -2   2  125.51    7.59
   2  -2   2  118.79    9.10
   0   2  -2  111.36    6.88
   2  -2   2  113.88   10.09
  -2   0  -2  117.70    9.65
   2  -2  -2  125.18    7.41
   2  -2  -2  120.23    5.79
   0  -2  -2  112.98    8.67
   0  -2  -2  122.77    8.52
   0   2   2  116.14    7.39
   2   0   2  128.61   11.74
  -2   0  -2  107.43    8.35
  -2   0   2  102.37    9.05
  -2   0  -2  130.99    8.63
  -2   2   2   99.88    8.93
   0  -2   2  120.82    5.65
   2  -2   2  113.75    5.35
   0   2  -2  116.67    7.16
  -2   2  -2  118.37    9.47
  -2   0  -2  113.48    8.28
  -2   0  -2  125.40    8.20
   2   0  -2  108.17    6.90
   0  -2  -2  134.69    8.45
   2   0   2  115.21    8.26
   0   2   2  121.48    7.94
  -2   2  -2  121.55    5.49
   0   2  -2  123.83    5.77
   2   0  -2  123.78    7.89
  -2   2   2  107.18   11.60
   0  -2   2  115.96   10.93
  -2   0   2  116.41   10.62
   2   0  -2   98.63    9.47
   2  -2  -2  124.80   11.63
   0  -2   2  126.69    9.55
   0   2   2  118.18    8.61
  -2   0   2  115.24    7.29
  -2   2  -2  112.83    8.14
   3  -1   2  779.14   27.79
  -2  -1  -2  793.80   27.83
  -3   2  -2  811.76   29.21
   3  -1   2  768.63   29.80
  -1   3  -2  812.99   26.55
  -2  -1  -2  807.07   30.57
   1  -3  -2  802.71   25.18
   2  -3   2  845.49   29.34
   2   1  -2  762.79   31.67
  -3   1   2  796.41   30.71
   2  -3   2  810.01   25.64
   1   2   2  769.21   28.03
   1  -3  -2  805.15   27.70
   3  -1   2  817.98   30.95
   1   2   2  810.03   27.99
  -3   1   2  756.61   30.47
   1   2   2  787.48   27.68
   1   2   2  808.98   26.86
  -3   1   2  753.54   27.53
   3  -2  -2  793.76   27.05
  -1  -2   2  790.28   27.65
  -1   3  -2  796.70   26.00
   2   1  -2  784.93   27.78
  -3   1   2  822.22   28.00
  -3   2  -2  806.41   26.56
  -3   1   2  784.98   26.95
  -1   3  -2  823.09   28.11
   3  -2  -2  743.79   30.84
   3  -1   2  803.73   29.28
   3  -2  -2  808.39   28.19
  -1  -2   2  796.53   31.19
   2   1  -2  795.13   28.09
  -3   2  -2  814.69   29.89
  -2  -1  -2  781.36   27.06
  -2  -1  -2  747.64   27.83
  -1  -2   2  852.39   30.27
   2   1  -2  784.39   27.24
   2  -3   2  773.29   29.50
  -1  -2   2  829.86   27.90
  -2  -1  -2  795.40   28.09
   3  -2  -2  760.99   28.75
   2   1  -2  793.71   31.95
   1  -3  -2  780.35   30.45
   3  -2  -2  804.04   27.02
   1   2   2  832.27   28.49
   2  -3   2  796.58   25.45
  -3   2  -2  757.38   27.92
  -1   3  -2  794.89   30.85
   3  -1   2  772.85   27.41
  -1  -2   2  808.96   27.76
   1   2   2  788.44   26.12
   1  -3  -2  771.91   27.62
   2  -3   2  786.15   27.15
  -1   3  -2  772.12   27.41
   1  -3  -2  803.12   25.72
   2   1  -2  791.36   29.12
   1  -3   2  771.02   26.10
  -1   3   2  785.41   27.72
  -3   1  -2  803.12   27.37
   3  -2   2  844.27   29.80
   3  -1  -2  765.71   32.83
  -3   1  -2  769.55   30.16
  -3   2   2  811.04   27.93
   1   2  -2  773.04   24.96
   3  -2   2  816.86   30.42
  -2   3  -2  765.96   29.68
   3  -2   2  777.64   27.88
   2   1   2  823.49   27.90
  -3   1  -2  763.50   27.69
   2  -3  -2  785.67   28.56
   1   2  -2  791.62   27.52
  -1  -2  -2  779.02   27.21
  -3   1  -2  810.50   29.40
   3  -1  -2  773.65   26.89
   1  -3   2  803.27   27.13
   1   2  -2  809.23   30.27
   3  -1  -2  803.87   30.61
  -1  -2  -2  809.83   28.02
   1   2  -2  803.51   27.68
  -3   2   2  746.26   26.40
   1   2  -2  790.94   30.80
   3  -1  -2  782.09   27.65
   3  -2   2  826.51   26.70
  -3   2   2  772.61   28.57
  -1  -2  -2  744.10   29.18
   2   1   2  748.83   30.26
  -1  -2  -2  766.30   28.11
   3  -1  -2  783.02   28.27
  -3   2   2  781.10   31.07
  -2  -1   2  785.24   27.91
   1   2  -2  797.60   27.46
   2   1   2  794.31   27.00
   3  -1  -2  817.33   30.77
  -1  -2  -2  812.45   28.24
   2   1   2  763.63   28.35
  -2  -1   2  786.55   30.50
   2   1   2  787.84   27.71
   2   1   2  770.30   27.82
  -2  -1   2  810.41   31.21
  -3   1  -2  771.17   30.13
  -3   2   2  813.37   27.31
   1  -3   2  794.04   26.99
  -2  -1   2  814.57   27.52
   1  -3   2  768.40   28.72
  -2   3  -2  790.81   26.65
   1  -3   2  792.18   27.76
   1  -3   2  824.46   31.33
   2  -3  -2  751.58   32.57
   3  -2   2  792.90   32.16
  -2   3  -2  813.64   29.11
   0   3   2   15.85    5.42
   3   0   2   11.30    5.03
  -3   3  -2   16.16    3.70
  -3   0   2   16.60    4.65
  -3   0  -2   10.06    5.12
   3  -3   2   18.20    6.13
   3  -3  -2   22.21    5.47
   3  -3   2   15.22    7.56
  -3   0  -2   17.21    6.48
   3  -3  -2   23.37    6.44
   0   3  -2   18.40    7.08
  -3   0   2   26.02    5.52
   0  -3   2   22.06    5.50
   0   3  -2   13.69    3.39
   3   0  -2   12.27    8.42
   0   3  -2   21.81    4.28
   0   3   2   18.45    3.86
  -3   3  -2   24.32    5.58
   3  -3  -2   29.94   10.65
  -3   0  -2   21.31    5.47
   3   0   2   20.64    5.33
  -3   3   2   13.67    9.76
  -3   3  -2   10.74    6.59
   0  -3  -2   12.83    5.89
   0   3   2   17.16    3.31
   0  -3   2   20.56    6.38
   0  -3   2   25.21    7.98
   3   0  -2   11.36    5.82
   0   3  -2   20.02    4.30
  -3   0  -2   12.23    5.42
   3   0   2   -5.04    7.37
   0   3   2   21.66    4.83
   3   0   2   10.48    6.23
   3   0  -2   -2.47    7.18
  -3   0  -2    8.71    4.77
   3  -3  -2    5.78    8.71
   3  -3   2   21.32    5.38
   0  -3  -2   31.48    6.74
  -3   0   2   20.16    5.20
  -3   0   2    7.88    7.27
   3   0  -2   12.13    4.35
   0  -3  -2   27.24    4.02
   3   0  -2   19.17    9.63
   3   0  -2   26.62    4.88
  -3   0  -2   15.82    7.77
   0   3   2   23.21    6.65
   3   0   2   26.57    5.93
  -3   3   2   21.71    3.50
  -3   3  -2   26.44    6.81
   3  -3   2   24.82    3.72
   3  -3  -2   11.65    5.74
   3   0   2   14.32    5.15
   0  -3  -2   12.56    3.74
   0  -3   2   22.39    4.59
   0  -3   2   12.62    5.45
   0   3  -2    0.53    6.21
  -3   3   2   20.44    6.09
   0  -3  -2   18.03    5.51
   0  -3  -2   23.62    5.47
   0  -3   2   23.18    2.76
  -3   0   2   31.33    9.26
  -3   3   2   22.24    5.60
  -4   2  -2   85.32    9.86
   2   2   2   98.89    8.85
  -2  -2   2  101.00   10.51
  -2  -2  -2  120.73   11.80
   2   2   2   91.99   11.08
   2   2   2  120.73    8.71
   2   2   2  142.04   11.21
  -4   2  -2   78.60    8.28
  -4   2   2  113.01   12.67
   4  -2  -2  125.22   10.66
   2  -4   2  126.99    7.05
  -2  -2  -2  110.03    7.45
  -2  -2  -2  111.90    9.99
  -2  -2   2  119.49    9.50
   4  -2   2  126.97   13.99
   2   2  -2  128.78   13.72
   4  -2  -2  121.92    9.58
  -2  -2   2  106.19   12.18
   4  -2  -2  107.96    9.13
   4  -2   2  117.59   12.24
   2   2   2  105.70    7.50
   2   2  -2  116.56    6.35
   2   2   2   92.88    7.95
  -2   4  -2  114.13    7.14
   2   2  -2  123.05    7.46
  -2  -2   2  112.47    9.69
  -4   2  -2  104.14   11.73
  -4   2  -2   96.49    7.95
   2   2  -2  123.26    9.30
   2  -4   2  100.27   12.10
  -2  -2  -2   90.95   10.92
   4  -2  -2   87.03    7.21
   4  -2   2  101.71    8.80
  -2  -2  -2  124.64    9.14
  -2  -2   2  112.95    8.76
   4  -2  -2   76.35   12.26
   2  -4  -2  129.41   10.10
  -4   2  -2  123.09    8.28
   4  -2   2  114.42    9.03
   2  -4  -2  123.84   10.82
   4  -2   2  105.10   10.47
  -4   2   2  103.61    9.33
   4  -2   2  119.44    9.64
   2  -4   2  113.63    8.39
   4  -2  -2   77.17   10.48
   2   2  -2  108.14   12.14
  -2   4  -2  106.64    8.56
   2   2  -2  100.82    9.32
  -4   2   2  106.90    8.54
  -4   2   2   97.15    9.77
   2  -4   2   92.62    9.41
   2  -4   2  109.05    9.11
   3  -4   2  139.05   12.17
   4  -1   2  144.74   10.71
  -4   1   2  129.97   12.69
  -1  -3   2  144.36   12.54
   1   3   2  119.90    9.82
   4  -1   2  130.91   10.44
   1   3   2  107.15   10.13
   4  -1   2  142.69   13.68
   4  -1   2  136.61   10.17
   1  -4  -2  142.78   10.51
  -4   1   2  112.60    9.06
   3  -4   2  112.31   14.90
  -1   4  -2  136.62    7.75
  -4   3  -2  127.36    8.09
  -4   3  -2  126.16   10.47
  -4   1   2  144.18    9.72
  -1  -3   2  142.78   14.44
   1  -4  -2  120.70    8.43
   1   3   2  107.02    9.63
  -3  -1  -2  118.74   10.75
   1   3   2  119.94    6.65
   4  -3  -2  118.16    8.95
   4  -1   2  136.11   12.21
  -4   1   2  142.83   13.71
  -3  -1  -2   98.03   10.26
   1   3   2  116.52   10.23
   4  -3  -2   84.66   11.96
  -1  -3   2  139.53    9.92
   4  -3  -2  140.41   11.47
  -1   4  -2  108.49   12.84
  -3  -1  -2   91.88    9.47
  -1  -3   2  131.86    9.86
  -3   4   2  135.73   11.81
   4  -3  -2  123.46   15.08
   1  -4  -2  129.08    6.92
   1  -4  -2  112.36   12.95
   1  -4  -2  118.02    8.92
   4  -3  -2  124.00   10.30
  -3  -1  -2  120.69    9.34
   3   1  -2  122.62   10.55
  -3  -1  -2  135.39   10.51
   3   1  -2   96.84   11.97
   3   1  -2  122.81    9.46
  -1   4  -2  126.67   10.60
  -1   4  -2  119.22    8.01
   3   1  -2  133.77   11.34
  -4   3  -2  121.69   11.59
   1   3   2  125.56    8.20
  -3  -1  -2  118.36   10.22
   4  -1   2  122.36   11.94
   3   1  -2  135.05   13.04
  -4   1   2  123.68    9.22
   3   1  -2  122.72    9.28
  -1  -3   2  140.38   10.45
   3  -4   2  109.46   10.08
  -1   4  -2  122.46   10.45
   4  -3  -2  124.78    9.45
   3  -4   2  120.59    7.20
  -4   3  -2  144.28   11.47
   3  -4   2  125.31    9.35
   4  -3   2  131.39    8.65
   4  -1  -2  128.89    9.47
   3  -4  -2  115.28   14.20
  -4   3   2  111.59    9.84
  -3  -1   2  124.01    9.89
  -1  -3  -2  142.85   10.69
   4  -1  -2  134.59   13.14
   3   1   2  108.75   10.95
   4  -1  -2  118.80   13.34
   3   1   2  123.63   11.75
   1  -4   2  116.14    9.82
   3  -4  -2  123.88   13.12
  -1  -3  -2  119.89   11.52
   1  -4   2  124.00   11.29
  -4   1  -2  129.38    9.99
   4  -3   2  121.28   14.28
   3  -4  -2  140.64   12.42
  -3  -1   2  119.12    9.30
  -4   1  -2  112.01   12.70
   1  -4   2  139.55   14.26
   3   1   2  143.00   10.15
  -3  -1   2  144.02   13.13
  -1   4   2  104.16    9.21
   4  -3   2  158.35   15.09
   3   1   2  143.57   10.86
  -1  -3  -2  111.63    9.86
   1   3  -2  119.52    9.53
   4  -1  -2  123.82   11.59
  -3  -1   2  112.49   10.22
   3  -4  -2   97.97    8.18
   3   1   2  144.55    9.22
  -1  -3  -2  125.67    8.96
   1  -4   2  123.71    8.37
   1   3  -2  129.78   12.62
  -4   1  -2   94.66    9.71
  -4   1  -2  138.16   10.09
  -3  -1   2  106.33   11.75
   3  -4  -2  123.23    7.25
   4  -3   2  113.20   10.37
  -4   3   2  132.10    9.58
   1  -4   2  118.10    8.70
  -4   3   2  132.09   10.86
  -1  -3  -2  139.52   10.97
  -4   1  -2  115.17   11.30
   1   3  -2  131.99    9.08
  -3   4  -2  132.44    8.79
  -3   4  -2   99.45   10.27
   4  -3   2  125.44   10.44
   4  -1  -2  106.38   10.68
  -3   4  -2  101.99    9.84
  -4   3   2  129.30   14.91
   1  -4   2  130.83    8.59
   4  -1  -2  127.30   10.57
   4   0   2  137.08   11.04
   4   0   2  154.42   15.58
  -4   0   2  117.35   13.13
   0  -4   2  126.97   10.00
  -4   4  -2  113.55   11.34
   4   0  -2  116.60   11.54
   0  -4  -2  141.44   12.27
  -4   0   2  163.37   10.48
   4  -4   2  126.38   10.77
   4  -4   2  119.40    8.16
  -4   4   2  122.90   10.22
   0   4   2  135.12    8.91
   0  -4  -2  149.59    7.64
   4   0  -2  139.86   11.36
  -4   0  -2  115.02   12.14
  -4   0  -2  134.94   10.75
   4   0   2  137.15   12.06
   4   0   2  135.11   10.46
  -4   0  -2  131.12   10.96
   0  -4   2  117.20    9.44
   0   4   2  114.70   11.75
  -4   0   2  121.34   10.57
   4   0  -2  119.88   12.47
   4  -4   2  141.16   12.22
   4   0  -2  132.12    9.96
   0  -4   2  154.68    9.74
   0   4   2  126.44    9.53
   4  -4   2  129.12   12.49
   4   0  -2  124.12   13.68
   0  -4  -2  128.52   10.53
   0  -4   2  141.37   11.61
   4  -4  -2  121.29   14.42
   4  -4  -2  132.22    9.75
   0   4   2  143.08    7.34
  -4   0  -2  136.92   10.48
   4   0   2  135.86   11.06
   4   0   2  148.88   10.66
   0  -4   2  136.44    5.93
   4   0  -2  140.85   10.71
   4  -4   2  154.23   17.37
   0  -4   2  118.78   13.50
   4  -4  -2  129.92   11.38
   0   4  -2  151.74   12.79
  -4   4  -2  137.70    8.03
  -4   4   2  107.66   10.03
   0   4  -2  140.18    8.55
  -4   0  -2  121.75   10.41
  -4   4  -2  142.08   10.28
   0  -4  -2  146.12   10.74
   0   4  -2  146.22    9.46
  -4   0   2  146.51   13.66
  -4   4  -2  139.91   12.34
   4  -4  -2  127.49   10.63
   0  -4  -2  140.82    8.70
   4  -4  -2  136.86   14.99
  -4   0   2  143.98   10.91
   0  -4  -2  115.84   10.81
   0   4  -2  132.04   12.80
  -2   5  -2  366.80   14.53
   3  -5   2  373.21   19.71
   5  -3  -2  398.72   19.13
   5  -2   2  339.48   16.68
   2   3   2  331.78   16.27
  -2  -3   2  375.37   17.26
  -5   2   2  370.01   17.06
  -2   5  -2  353.40   21.45
  -5   2   2  357.84   16.06
   5  -2   2  389.75   16.89
   3   2  -2  380.16   14.88
   3   2  -2  354.25   16.45
  -5   2   2  361.12   21.23
  -3  -2  -2  377.13   15.91
  -2   5  -2  391.36   15.71
   3   2  -2  400.21   17.72
   2  -5  -2  355.58   17.74
   2  -5  -2  368.03   22.07
  -3  -2  -2  372.35   18.16
   2   3   2  359.59   17.87
   2   3   2  392.22   17.68
   2   3   2  370.68   15.94
   5  -3  -2  371.36   22.24
  -3  -2  -2  379.62   17.30
   3  -5   2  382.05   15.63
   3   2  -2  371.98   22.80
  -2  -3   2  356.36   16.91
  -5   3  -2  398.84   17.53
   2  -5  -2  339.75   19.43
  -2  -3   2  374.71   22.54
   5  -2   2  375.74   17.91
  -3  -2  -2  358.35   21.48
   3   2  -2  387.87   23.26
   3  -5   2  385.95   14.32
   2  -5  -2  344.44   17.63
  -2   5  -2  344.11   18.66
   5  -3  -2  392.76   16.80
  -2   5  -2  374.26   13.96
  -2  -3   2  365.11   17.04
   2  -5  -2  361.28   13.34
   5  -2   2  399.32   20.98
   3   2  -2  346.29   16.67
   2  -5  -2  376.65   13.93
   5  -3  -2  359.98   24.10
  -5   3  -2  360.70   21.21
   2   3   2  372.71   13.88
  -5   2   2  348.09   20.31
  -3  -2  -2  363.15   17.29
   5  -3  -2  369.77   16.30
   2  -5  -2  354.53   16.81
   3  -5   2  366.04   19.87
  -3  -2  -2  345.08   17.32
   5  -2   2  343.13   20.02
  -5   3  -2  380.43   18.98
  -5   3  -2  352.54   15.40
   5  -3  -2  386.08   17.63
   5  -2   2  370.50   20.52
  -3  -2   2  361.62   16.62
  -2  -3  -2  390.33   17.59
  -2  -3  -2  360.50   17.37
   5  -2  -2  389.47   20.37
  -5   2  -2  384.50   21.64
   5  -3   2  374.92   16.33
  -2  -3  -2  346.57   19.67
   5  -2  -2  377.67   20.97
   2  -5   2  341.25   21.94
   3  -5  -2  358.83   18.67
   2  -5   2  400.11   14.94
  -5   2  -2  383.11   16.57
  -3  -2   2  376.74   17.42
   5  -3   2  344.08   16.95
  -3  -2   2  336.11   20.63
   2   3  -2  388.45   16.92
   2   3  -2  345.45   19.75
  -3  -2   2  403.89   17.59
   5  -3   2  355.32   22.10
  -2  -3  -2  380.50   16.84
  -3   5  -2  359.49   20.30
   3   2   2  383.73   19.95
   5  -3   2  325.65   21.94
   5  -3   2  358.92   19.59
   2   3  -2  382.47   17.06
   2   3  -2  402.24   16.80
   3  -5  -2  381.95   16.44
  -5   2  -2  383.49   21.42
  -3   5  -2  395.14   19.79
   5  -2  -2  360.26   23.38
  -3   5  -2  364.43   14.33
   3   2   2  354.39   20.80
  -5   3   2  362.06   21.18
  -5   2  -2  397.46   20.33
   3   2   2  373.74   17.77
   3   2   2  347.51   16.37
   2  -5   2  355.35   18.44
   5  -2  -2  377.93   16.98
   3   2   2  367.85   14.88
   3   2   2  350.28   16.88
  -3   5  -2  372.92   14.70
   5  -2  -2  367.76   17.62
  -5   2  -2  387.91   17.35
   5  -3   2  390.13   17.65
   3  -5  -2  368.06   21.51
  -2  -3  -2  370.88   13.98
   2   3  -2  327.01   21.12
  -5   3   2  362.03   18.53
  -5   3   2  369.25   16.59
   2  -5   2  373.06   17.35
  -5   3   2  356.72   16.44
  -2  -3  -2  382.42   19.42
   5  -2  -2  334.29   15.95
   2  -5   2  349.78   15.85
   2  -5   2  376.53   15.52
   1   4   2    1.22    2.73
   1  -5  -2    9.70    6.64
   5  -1   2   12.81    7.70
   1  -5  -2    7.22    5.73
   5  -4  -2    7.14    5.60
   5  -1   2    0.75    4.91
  -1  -4   2   -4.87    5.81
  -5   1   2    0.69    7.86
   5  -4  -2    7.48    5.52
   5  -1   2    0.28    5.37
   5  -4  -2    7.70    5.01
  -5   4  -2   -0.33    8.14
   4   1  -2    8.33    5.86
  -1  -4   2    7.20    4.85
   1   4   2    0.23    5.60
  -4  -1  -2    7.95    4.79
   4   1  -2    0.84    4.83
   5  -4  -2   -0.21   10.13
   4  -5   2   -2.15    7.18
   4  -5   2   12.97    8.14
  -1   5  -2    6.18    5.92
  -5   1   2   14.61    5.06
  -4  -1  -2    2.10    6.29
   1  -5  -2    4.61    7.35
   1  -5  -2   -0.26    4.51
   4   1  -2    2.77    4.22
   4   1  -2    3.18    5.69
   5  -1   2    0.94    8.10
  -4  -1  -2    6.17    5.64
   4   1  -2    0.98    9.22
   5  -4  -2    2.56   10.23
  -1   5  -2   -5.06    3.85
  -5   4  -2    4.16    3.92
  -1  -4   2    4.24    5.21
  -5   1   2    4.31    5.09
   5  -1   2    6.74    5.60
  -4   5   2    8.67    6.66
  -5   1   2    2.45    4.93
  -4  -1  -2   -1.22    6.09
  -1  -4   2   10.11    5.62
  -5   4  -2    1.87    5.49
   1  -5  -2    0.87    3.67
  -4  -1  -2   -0.73    7.94
   4  -5   2    6.65    4.91
   4  -5   2    5.55    3.67
   1   4   2    2.27    5.37
   5  -1   2    8.46    6.58
   5  -4  -2    2.04    5.15
  -1  -4   2   16.06    9.13
  -5   4  -2    5.78    6.58
  -1   5  -2    5.53    7.69
   1   4   2   -0.88    5.64
   1  -5  -2    1.54    3.98
   1   4   2    1.47    4.08
   1   4   2    2.83    5.35
   4   1  -2   15.37    9.11
  -1   5  -2    2.92    3.44
  -5   1   2    1.25    8.39
  -4  -1  -2   -2.81    5.48
   5  -4   2    4.88    6.12
   4  -5  -2    9.09    6.47
  -1   5   2   -4.91    5.13
   1  -5   2    2.49    4.49
  -1  -4  -2    2.54    7.06
   1  -5   2   10.98    3.91
   4  -5  -2    5.57    3.80
  -1  -4  -2    2.98    5.74
  -5   1  -2    2.65    7.18
  -5   1  -2   -3.90    7.11
  -5   4   2    8.63   10.64
  -5   1  -2   -0.89    5.17
  -4  -1   2   -1.80    7.91
  -4  -1   2   -5.76    7.18
  -4   5  -2   -2.36    7.20
  -5   1  -2    7.33    5.34
  -4   5  -2    1.93    4.09
   1   4  -2    2.45    4.87
   1   4  -2   -4.64    6.58
  -4  -1   2    8.25    5.46
   1  -5   2    0.72    8.25
   5  -1  -2    5.47    4.83
   5  -1  -2   -3.03    7.91
   1  -5   2    5.64    4.47
   5  -1  -2    1.08    8.04
  -5   4   2    2.03    4.87
   4  -5  -2   17.38    8.85
  -5   1  -2    7.71    5.88
  -1  -4  -2   -5.34    4.75
   5  -4   2    1.22    8.48
   5  -4   2   11.44    4.73
   1   4  -2    4.31    4.39
   4   1   2    1.86    5.27
   1   4  -2    7.07    7.42
   5  -1  -2   11.09    8.84
  -5   4   2   -1.31    4.94
  -4   5  -2   13.94    7.82
   4   1   2    2.98    4.74
   5  -4   2    4.87    6.49
   4   1   2    4.16    6.16
  -5   1  -2    5.40    7.38
   1  -5   2    1.46    4.84
   5  -1  -2    9.11    4.96
   4   1   2   -3.19    7.37
  -1  -4  -2    6.91    6.17
   4   1   2    3.87    5.78
  -4  -1   2   13.24    5.16
  -1  -4  -2    1.19    5.36
   4  -5  -2   -0.30    5.29
  -5   4   2    2.92    5.60
   5  -1  -2   12.23    6.09
   4  -5  -2   11.51   10.21
   5  -4   2    3.77   10.74
  -4  -1   2    3.36   11.29
   4   1   2   15.61    9.40
   0   5   2 1301.47   49.32
   5  -5   2 1415.49   55.61
   0   5   2 1323.33   46.66
  -5   0   2 1354.94   46.55
   5  -5  -2 1371.72   53.11
   5  -5   2 1321.74   51.77
  -5   0   2 1372.11   50.90
   0   5  -2 1336.29   47.93
   5   0  -2 1375.09   46.53
  -5   5  -2 1372.71   46.08
   5   0   2 1296.17   49.07
   5   0   2 1421.15   47.89
   0  -5  -2 1417.13   47.36
   5   0   2 1319.63   51.81
   5  -5   2 1323.98   48.38
  -5   0  -2 1357.59   47.37
  -5   0  -2 1316.02   51.97
   5  -5  -2 1305.95   47.58
   0  -5  -2 1339.86   43.83
   5   0   2 1345.96   47.51
  -5   0  -2 1392.27   49.76
   5   0  -2 1410.35   49.74
  -5   5  -2 1342.79   44.73
   0  -5   2 1354.43   47.77
   0   5  -2 1360.17   45.15
   0  -5   2 1366.18   46.35
   0  -5  -2 1323.03   47.08
   5   0   2 1406.88   48.16
   5  -5  -2 1339.85   54.39
   0  -5  -2 1369.18   46.96
  -5   0   2 1382.43   47.60
   5   0  -2 1404.03   52.54
   5   0  -2 1405.83   47.71
  -5   5  -2 1278.90   50.66
   0   5  -2 1333.49   50.64
   0  -5  -2 1357.50   49.52
   0   5   2 1344.75   44.86
  -5   0   2 1313.67   47.47
   5  -5   2 1368.25   45.07
   0   5   2 1377.17   43.99
   0   5  -2 1356.59   45.81
   5   0  -2 1415.04   54.82
  -5   5   2 1346.53   47.96
   5   0  -2 1342.56   51.02
   5   0   2 1318.66   46.95
   5  -5   2 1386.12   49.54
  -5   0  -2 1383.92   47.88
  -5   0  -2 1355.36   49.47
  -5   0   2 1368.60   52.27
  -5   0  -2 1391.90   49.61
   5  -5  -2 1334.44   46.72
  -5   5  -2 1386.72   52.22
   0  -5   2 1343.14   51.09
  -3  -3   2    3.39    6.49
   6  -3   2   -3.93    8.43
   3  -6   2   -3.65    3.94
   3  -6   2    1.07    9.85
  -3  -3  -2    7.69    5.87
  -6   3  -2    5.69    7.51
  -6   3   2   -5.91    8.84
   3  -6  -2   -5.88    6.58
   3  -6   2    0.28    4.00
  -3  -3  -2  -13.11    8.29
   3   3   2   -7.67    6.16
   3  -6   2    0.09    6.62
   3  -6  -2   -4.41    3.05
   3   3  -2    3.71    2.67
  -6   3  -2    7.03    4.89
  -3  -3   2  -11.71    8.96
  -6   3   2    1.54    7.83
   6  -3   2   -0.88    5.40
  -6   3  -2   -0.11    9.60
   3  -6  -2    3.20    3.08
   6  -3  -2    0.91    8.08
   3   3   2   -4.69    4.37
   3   3  -2    0.53    4.77
   6  -3  -2   -0.43   15.12
   3   3   2    4.46    6.84
  -3   6  -2   -2.53    3.83
   6  -3  -2    6.15    5.94
   6  -3   2   -7.63    8.00
  -3  -3  -2  -13.88    6.70
   6  -3  -2   -2.31    5.09
   3   3  -2    9.31    9.15
   3   3  -2    2.37    5.67
   3   3  -2    5.95    8.56
   6  -3   2    9.05    8.21
  -3  -3  -2   -5.51    5.56
   3  -6  -2   -1.92    7.45
   3  -6  -2    0.88    9.54
   6  -3  -2   -6.59    4.87
  -3  -3  -2   -4.80    4.59
   6  -3   2    3.30    5.39
  -3  -3   2   -1.88    5.17
  -3   6  -2    1.10    3.19
  -3  -3   2   -6.87    5.57
   3  -6   2    7.07    7.49
   3  -6  -2   -1.08    5.37
   3   3   2    3.52    3.54
   3   3   2    0.64    5.26
  -3  -3  -2    1.43    4.47
  -6   3  -2  -11.12    7.88
   6  -3   2   -1.67    6.05
  -6   3   2    4.95    5.41
   3   3   2   -3.85    7.46
   6  -3  -2    1.02    9.82
   3   3  -2    0.41    4.47
  -6   3   2   -2.85    5.21
   2  -6  -2    4.10    5.78
  -2  -4   2   18.01    7.73
   4   2  -2    2.09    5.29
  -4  -2  -2   12.93    7.54
   6  -2   2   -4.07    7.94
  -4  -2  -2   37.85   19.44
  -6   4  -2    3.25    4.64
  -4  -2  -2    7.70    5.93
   2  -6  -2   14.00    5.78
   6  -4  -2   11.29    9.79
  -2  -4   2   10.72    5.98
   4   2  -2   25.41   12.34
   4  -6   2    8.59    3.74
  -4  -2  -2    5.66    6.36
  -2  -4   2   26.68   12.12
   6  -2   2   21.69    7.57
   4  -6   2    9.00    3.98
   6  -4  -2    7.23   10.37
   4   2  -2   10.49    5.63
   2   4   2   10.64    6.30
   6  -2   2    2.84    5.67
   6  -4  -2    7.00    7.45
  -6   2   2    2.62    5.25
   4   2  -2    3.05    4.19
   4  -6   2    9.74    8.00
  -4  -2  -2    8.53    6.69
   2  -6  -2   11.90    6.73
   2  -6  -2    2.02    3.73
   2   4   2   10.92    6.53
   6  -2   2    2.84    5.88
   4  -6   2    9.07    5.01
  -2  -4   2    7.12    5.82
   4  -6   2   13.14   10.88
  -6   2   2   13.44    5.78
  -2   6  -2    9.76    3.37
   2  -6  -2   17.53    6.80
  -6   2   2   -2.13    7.36
   2  -6  -2    7.58    4.03
  -6   4  -2    0.55    7.84
   2   4   2   -7.83    5.68
   4   2  -2   21.26    7.15
   2   4   2    8.55    2.59
   6  -4  -2    6.25    6.18
  -6   2   2   14.32   10.05
  -4  -2  -2   16.96    6.33
   4   2  -2   26.29   10.81
  -6   2   2    7.02    5.54
   6  -4  -2   -1.46    5.08
  -2   6  -2   19.14    5.11
  -2  -4   2    8.56    6.53
   2  -6  -2   21.11    9.68
   4  -6   2    4.34    7.88
  -6   4  -2    6.62    6.69
   6  -2   2   -5.07    6.07
  -2   6  -2    5.35    4.32
  -6   4  -2    8.31    6.45
  -2   6  -2    8.80    9.28
   6  -4  -2    1.56    5.09
   2   4   2    9.64    6.69
   2   4   2    7.60    4.58
  -4  -2   2    2.69    7.65
   6  -2  -2   15.89    9.00
  -4  -2   2   12.76    7.12
   4  -6  -2   17.48   11.46
   2  -6   2   10.60    6.66
   4   2   2    9.18    4.53
  -4  -2   2   17.05    6.54
   6  -4   2    2.42    9.85
  -2  -4  -2   11.40    7.10
  -6   4   2   10.70    5.81
  -4   6  -2    5.63    3.61
   4   2   2   23.80   10.24
   6  -2  -2    6.96    5.58
   2   4  -2    6.63    4.48
   4   2   2   17.91    8.33
  -2  -4  -2    6.95    6.40
   2   4  -2   15.26    6.18
  -4   6  -2   11.83    3.80
   4  -6  -2    4.94    5.12
   4   2   2   -3.61    6.38
  -6   4   2    7.76   10.32
   2  -6   2   17.06    4.75
  -6   2  -2    1.24    6.25
   6  -4   2   15.21    5.52
   2  -6   2    6.29    5.08
   4  -6  -2   10.58    6.90
  -6   2  -2    5.93    5.29
   4  -6  -2    4.30    5.42
  -6   2  -2   -0.44    8.70
  -6   2  -2    1.83    8.13
  -2   6   2    8.93    5.50
   2  -6   2    6.94    5.39
  -2  -4  -2    7.61    5.36
   2   4  -2   21.49    6.46
   4   2   2    9.73    5.72
   6  -2  -2    4.46    9.09
   4   2   2   24.75    6.65
   6  -4   2    4.44   11.05
  -4  -2   2   10.98    9.36
  -4  -2   2    1.31    6.12
   4  -6  -2    1.53    7.87
   6  -2  -2   20.93   10.01
   6  -4   2    8.53    6.16
  -4   6  -2    5.62    7.71
   2  -6   2   12.00    4.73
  -2  -4  -2   38.52    9.91
  -6   2  -2   -7.93    7.23
  -6   4   2    5.60    5.31
  -2  -4  -2    8.16    6.49
   6  -4   2   -1.97    6.06
   6  -2  -2    8.32    5.90
   2   4  -2    1.27    7.67
  -4   6  -2    3.71    7.98
   6  -4   2   11.22    6.85
  -6   4   2    6.53    6.29
  -5  -1  -2   50.63   12.54
   1  -6  -2   46.26    5.66
   1  -6  -2   50.22    5.84
   5   1  -2   45.38    7.29
   5   1  -2   39.75    7.40
  -1  -5   2   48.88    7.68
  -5  -1  -2   40.51    8.46
   5  -6   2   28.67   11.28
   5   1  -2   18.28   10.95
   5  -6   2   42.87    8.87
   6  -1   2   41.95    8.73
   1  -6  -2   34.49    5.90
   6  -1   2   51.29   10.69
   1   5   2   45.35    7.21
   6  -1   2   51.82   10.75
  -6   5  -2   50.42   10.95
  -6   5  -2   32.52    5.23
   5  -6   2   46.93    6.67
  -1  -5   2   55.62    9.50
   6  -5  -2   39.49    7.42
   6  -1   2   31.87    6.54
   6  -5  -2   46.04    7.69
   6  -5  -2   36.28    7.26
   1   5   2   33.45    8.36
   5   1  -2   33.70    7.01
  -6   1   2   37.97    7.33
  -6   1   2   27.96    9.25
  -6   5  -2   27.21    7.90
  -6   1   2   31.16   10.72
  -6   5  -2   39.50    7.53
   6  -1   2   27.26    6.55
  -5  -1  -2   36.32    7.45
   6  -5  -2   29.70   10.55
   1   5   2   38.76    5.50
  -1  -5   2   38.23    6.93
   6  -1   2   34.13    7.70
  -6   1   2   38.09    6.84
  -1   6  -2   39.31    7.06
  -1  -5   2   55.29    9.11
   5  -6   2   41.00    5.52
  -5  -1  -2   28.12    8.78
  -1   6  -2   44.67    5.04
  -1   6  -2   31.40   10.13
   1  -6  -2   38.82   10.08
  -6   1   2   36.23    6.57
   6  -5  -2   46.55   12.74
   1  -6  -2   41.87    7.09
  -1  -5   2   49.98   11.40
   1  -6  -2   41.99    7.53
   1  -6  -2   42.48    8.75
   6  -5  -2   49.65    7.39
   5   1  -2   36.43    7.63
   5   1  -2   37.48   12.39
  -5  -1  -2   46.08    7.32
  -5  -1  -2   26.66    6.77
  -1   6  -2   25.70    5.49
   1   5   2   40.19    8.53
   5  -6  -2   38.75    8.18
   1  -6   2   39.48   11.15
  -1  -5  -2   51.78    8.61
   6  -1  -2   36.25   11.15
  -5   6  -2   47.39    5.58
   5  -6  -2   53.25    5.83
  -5  -1   2   32.52    6.81
  -6   1  -2   32.41    6.58
   5   1   2   45.99   10.11
  -6   1  -2   36.92   10.01
   6  -5   2   35.61    6.09
   5   1   2   27.22    8.30
  -1   6   2   26.23    6.59
   5   1   2   29.01    6.24
   1  -6   2   23.23    7.91
   6  -5   2   36.46    7.85
   1  -6   2   43.31    4.83
  -6   5   2   33.21    6.57
   5  -6  -2   29.98   10.22
  -6   1  -2   59.66    8.29
  -5  -1   2   39.48   12.48
   1   5  -2   41.96    9.60
   5  -6  -2   34.47   11.51
   1   5  -2   27.91    6.61
   6  -1  -2   43.72   10.93
   5  -6  -2   40.24    6.60
  -6   1  -2   38.72    7.17
  -5  -1   2   30.33    7.40
  -5  -1   2   36.23   11.67
  -1  -5  -2   50.97    7.46
   1   5  -2   44.20    6.03
  -6   1  -2   35.71   11.16
  -5   6  -2   33.78    9.93
   6  -5   2   36.26    8.23
   6  -5   2   41.26   12.33
   5   1   2   30.41    7.76
  -6   5   2   32.26    7.74
   5   1   2   35.00    7.31
  -1  -5  -2   47.62    9.99
   6  -1  -2   46.52   11.05
   5   1   2   34.75    6.95
   6  -1  -2   39.60    7.01
  -6   1  -2   35.66    9.67
  -1  -5  -2   44.32    7.92
  -5   6  -2   33.91    8.62
   1   5  -2   35.75    9.00
  -1  -5  -2   22.95    7.00
  -1  -5  -2   48.44    4.69
   1  -6   2   32.76    6.23
   1  -6   2   28.32    5.92
   1  -6   2   35.87    7.15
  -6   5   2   42.27    6.16
   6  -1  -2   23.93    5.77
   6  -5   2   15.33    9.87
   6  -1  -2   25.46    7.54
   6  -6  -2   15.60    6.13
  -6   6  -2   10.95    8.19
   0  -6  -2    6.59    5.09
   6   0  -2   21.81    8.01
   6   0  -2   11.46    6.43
   6   0  -2    4.74    5.17
   6   0  -2   18.49   10.88
   0  -6  -2   11.68    8.80
  -6   0   2   15.32    6.50
   6  -6  -2   13.12    5.15
   6  -6  -2   25.56    9.83
   6  -6   2   16.67    5.94
   0  -6  -2    3.67    3.27
   0  -6  -2   10.33    6.85
   0  -6  -2    6.45    5.65
  -6   0   2    5.29   10.01
   6  -6  -2   -1.29   11.26
  -6   6   2    4.54    8.02
   0   6   2   10.89    3.51
   0   6  -2    9.90    4.45
   6   0  -2    8.56   10.94
   6   0   2    1.13    6.81
   0   6   2    8.93    6.30
   0   6   2   15.28    8.31
   0   6   2   17.88    4.96
   6   0   2    7.06    6.29
  -6   0   2    5.06    8.90
   0  -6   2   14.40    6.71
   0   6  -2    5.88    5.68
  -6   0  -2    7.57    8.27
   6   0   2   17.99    7.63
   6  -6   2   13.47    7.89
   6  -6   2   16.00   11.54
   6  -6   2   17.51   10.53
  -6   0  -2    8.30   10.36
  -6   0  -2   11.72    6.56
  -6   0   2    3.87    6.04
   6   0  -2   20.45    8.37
   0  -6   2   11.84    7.59
   0  -6   2   19.92    6.66
   6   0   2   13.74    9.06
  -6   0  -2    8.71    6.59
   0  -6   2   16.78   10.08
   0   6  -2    3.18    7.24
   6  -6   2   12.19    5.27
   0   6  -2   14.35    9.00
   6   0   2   36.90    7.85
   0  -6  -2   11.12    4.90
  -6   6  -2    5.99    9.75
   0  -6  -2    6.34    7.46
  -6   0  -2   22.72    9.32
   6  -6  -2   16.65    7.24
  -6   0   2   20.77    6.75
   6  -6  -2    7.56    5.74
  -6   6  -2    4.83    5.25
   6   0   2    9.64   11.89
  -6   0  -2    7.32    6.39
   0  -6   2   23.73    6.95
   4   3  -2   78.94    9.60
   7  -4  -2  120.64   12.76
   7  -3   2   95.96    9.97
   7  -3   2   76.41   11.08
   4  -7   2   87.55    7.19
  -4  -3  -2   99.62    9.93
  -7   4  -2  132.15   13.19
   4   3  -2  105.90   14.84
   4   3  -2  125.94   11.33
   7  -3   2  136.03   12.70
  -7   3   2  114.84    9.75
   3  -7  -2   86.61   10.80
   7  -3   2  112.22   14.68
   3   4   2  112.37   10.31
   3  -7  -2  103.48    9.57
   3  -7  -2   96.09   11.24
   3  -7  -2  117.89   16.99
   3   4   2  109.80   10.83
  -3  -4   2  110.64   10.49
   4  -7   2   99.87    8.44
   4   3  -2   88.53    7.54
   4  -7   2  163.25   16.81
   4   3  -2  135.74   16.51
   7  -4  -2  136.25   17.95
  -7   4  -2   85.41   15.55
   7  -4  -2   82.56   10.40
  -3  -4   2  113.31   10.94
  -3  -4   2   79.23    8.53
   4   3  -2   92.36    9.88
   7  -4  -2  108.58   15.57
   7  -4  -2   94.47    9.65
   7  -3   2   88.11   13.32
  -4  -3  -2  106.72   11.36
   3   4   2  121.81   13.55
   7  -4  -2   94.73   10.24
  -4  -3  -2   97.67   11.68
   3   4   2  109.52    6.96
   4  -7   2  112.05    8.68
  -4  -3  -2   89.48    9.17
   4   3  -2   98.80    7.45
  -4  -3  -2   69.12   10.57
  -7   3   2  102.25   15.32
  -7   3   2  113.89   12.51
  -4  -3  -2   81.09   12.09
  -7   4  -2  101.03    8.83
  -7   4  -2  110.84   10.85
   7  -3   2   89.98   14.46
  -3  -4   2  115.32   15.52
  -3  -4   2  108.23   13.67
  -7   3   2   96.52    9.47
   3  -7  -2  111.17    7.49
   3  -7  -2   90.37   10.52
   4  -7   2   94.95   15.58
   4  -7   2   99.94   12.18
   3  -7  -2   99.15    7.91
  -3  -4  -2  117.34   11.09
  -3  -4  -2   95.43   13.09
  -4  -3   2  112.98   14.34
  -7   3  -2   74.88   12.93
   7  -4   2  121.84   14.88
   4  -7  -2  111.19    7.30
  -3  -4  -2  102.18   10.79
  -4  -3   2   89.92   10.09
   4   3   2  111.19    8.45
   3   4  -2  115.79   10.60
  -7   4   2   94.37    9.46
   7  -3  -2   95.39   14.51
   3   4  -2  121.84   10.74
   3   4  -2   87.39    9.64
  -7   4   2  113.06   16.09
   4  -7  -2  114.53   17.13
   7  -3  -2  134.58   13.98
   3  -7   2   78.85   16.22
   4   3   2   96.74   11.84
   7  -3  -2   91.15    9.32
   4  -7  -2   88.97   10.83
  -7   3  -2  107.87   15.18
  -7   3  -2  107.50   10.44
   7  -4   2  102.21   15.93
  -4  -3   2   88.33    9.47
  -4  -3   2  107.47   14.19
  -7   4   2   94.42    9.78
   4   3   2   92.44    8.40
   3  -7   2   94.01   10.19
   7  -4   2   78.20   10.45
   3   4  -2  114.76   14.05
   4  -7  -2   90.07   11.73
   4   3   2  134.31   13.56
   7  -4   2  104.69   11.30
   7  -3  -2   85.04   15.53
  -3  -4  -2   86.92    9.74
   4  -7  -2   89.35    8.58
  -3  -4  -2  103.70    8.72
   4   3   2   71.30    9.10
  -7   3  -2  113.22   13.34
  -7   4   2  141.67   18.67
  -3  -4  -2   98.46   12.43
   3  -7   2  102.94   16.47
   7  -4   2  110.04   10.52
   3  -7   2  108.32    9.47
   3  -7   2   86.58    8.34
   7  -3  -2  123.85   11.99
   3   4  -2  114.59   14.18
   7  -4   2  115.03   10.29
   4   3   2   99.20   11.78
  -7   3  -2  113.15    9.60
   7  -2   2   25.41    7.89
  -2   7  -2   25.77    5.11
   2  -7  -2   24.67    5.48
  -7   2   2   14.29    6.77
   7  -2   2   11.75    6.95
  -2  -5   2   20.93    6.91
  -7   2   2   11.49    6.82
   7  -5  -2   13.62   11.61
   2   5   2   26.63    8.31
   2  -7  -2   20.39    7.19
   7  -5  -2   22.05    6.78
  -7   2   2   17.54    6.37
   5   2  -2   26.74    6.26
   2  -7  -2   11.46   10.82
  -7   5  -2   25.00    5.89
  -7   5  -2   21.08    7.47
   7  -5  -2   19.16    7.43
   2   5   2   10.46    6.21
   2   5   2   25.40    8.06
   2  -7  -2   18.89    6.90
   5  -7   2   20.27    4.53
  -5  -2  -2   12.53    7.19
   5   2  -2   31.35   13.65
  -5  -2  -2   26.35   11.22
   5   2  -2   42.24   14.78
   7  -2   2   22.90    9.99
  -2  -5   2    7.87    7.00
   5  -7   2   16.96   12.46
  -7   5  -2   24.74    7.88
   2  -7  -2   13.65    6.17
   2  -7  -2   20.88    5.25
  -5  -2  -2   35.46    9.61
   5   2  -2    6.67    6.54
  -2  -5   2   62.61   15.32
   5  -7   2   24.05   10.00
   7  -5  -2   17.50    6.19
  -2   7  -2   15.56   10.08
  -2   7  -2   11.15    5.08
   2   5   2   21.89    7.65
  -7   2   2   14.49   10.85
   5  -7   2   26.52    6.39
  -2  -5   2   27.45    6.83
  -2  -5   2   18.28    7.69
  -5  -2  -2   19.24    7.78
  -5  -2  -2   29.19    8.58
   5  -7   2   16.97    4.55
  -7   2   2   22.32    9.43
  -2   7  -2   23.05    4.01
   5   2  -2   25.47    5.67
  -7   5  -2   24.75   11.20
   7  -2   2   27.66    9.67
   2   5   2   23.67    5.94
   5   2  -2   24.18    7.99
   2  -7  -2   18.65    8.57
  -5  -2  -2   16.02    7.18
   7  -2   2   13.04    6.73
   7  -5  -2   37.11    8.23
   7  -5  -2   22.59   12.89
   5   2   2   21.63    5.53
   7  -2  -2   14.61    7.05
   2  -7   2   27.75    6.22
  -5   7  -2   31.73   10.25
  -5  -2   2   36.97    7.48
  -7   5   2   19.27    7.03
  -2  -5  -2   21.26    6.78
  -7   2  -2   20.50   10.38
  -2   7   2   24.01    6.73
  -2  -5  -2   19.89    7.82
  -5  -2   2   48.31   15.75
   2   5  -2   22.27    8.51
   7  -2  -2   13.64    6.85
   5   2   2   43.01   12.92
   7  -5   2   14.17    7.39
  -5  -2   2   37.15   24.34
   7  -5   2    9.79    7.05
   5  -7  -2   14.98   11.97
  -7   5   2   26.11    6.36
  -7   5   2   21.34   13.67
  -7   2  -2    8.68    9.92
   2   5  -2   22.18    9.46
   2  -7   2   27.62    6.26
   2  -7   2   18.58    8.21
   2  -7   2   21.61   11.71
  -7   2  -2   22.73   10.83
   7  -2  -2   20.34    8.27
   7  -2  -2   11.33   10.72
  -2  -5  -2   25.37    7.61
   7  -5   2   14.54    6.64
   5  -7  -2   15.18    9.01
   5  -7  -2   21.23    6.10
   5   2   2   17.86    7.82
   5   2   2   26.17    9.17
   7  -2  -2   22.03   10.68
  -2  -5  -2   16.14    7.40
   5  -7  -2   23.27    8.08
  -7   2  -2   15.33    7.04
   7  -5   2   13.22   11.64
  -5  -2   2   16.96    7.24
   7  -2  -2   10.60   10.00
   2  -7   2   22.11    6.25
   5  -7  -2   26.63    4.76
   2   5  -2   14.32    6.91
  -2  -5  -2   40.47   12.12
   5  -7  -2   21.54    6.08
   5   2   2   23.29    6.16
   7  -5   2   19.25    6.60
  -7   5   2   15.50    6.96
  -5  -2   2   16.29    9.58
  -7   2  -2   26.87    7.02
   2  -7   2   21.03    6.09
   6  -7   2   15.46   10.09
   1  -7  -2   -7.06    6.83
   7  -6  -2    6.42    6.81
   1  -7  -2    4.75    5.49
   6  -7   2    4.58    7.81
  -6  -1  -2   20.78    7.39
  -6  -1  -2    2.66    7.06
   7  -1   2   -2.13    6.44
   7  -1   2   -9.48   22.03
  -7   1   2    0.93    6.00
   7  -1   2    5.11    6.69
   1   6   2    8.09    4.54
   6   1  -2    5.16   11.71
   7  -6  -2   -0.44    6.39
   6  -7   2   -2.29   11.00
   6  -7   2    0.97    5.75
  -6  -1  -2    2.02    6.72
   1  -7  -2   -2.24    4.82
  -6  -1  -2    2.76   10.55
   1  -7  -2    2.44    5.65
  -7   6  -2    7.24    6.46
  -1  -6   2   17.00    8.38
  -1  -6   2    8.09    6.15
  -1   7  -2    5.27    5.86
  -7   1   2   -6.64    6.07
   6   1  -2   -0.01    6.97
  -6  -1  -2    2.75    8.57
   1   6   2    1.83    5.82
  -7   6  -2    2.01    9.00
   1  -7  -2    4.15    9.60
  -7   1   2  -12.83    5.83
   7  -1   2   -2.36    7.13
   6   1  -2    7.81    6.47
   6   1  -2    3.52   12.49
  -6  -1  -2   -5.62    8.82
  -1   7  -2    4.97    4.12
   7  -6  -2   -6.79    9.94
   6  -7   2   -5.85   10.46
  -6   7   2    7.51    7.94
  -7   1   2   -4.59    9.60
  -1  -6   2    4.79    7.13
   7  -6  -2    9.18   11.91
  -7   1   2   -6.46   10.00
   1  -7  -2   -2.65    8.12
   7  -1   2   -0.14    8.91
   7  -1   2   -0.73    7.50
   7  -6  -2    0.17    6.40
  -7   6  -2    0.45    8.08
  -1   7  -2    6.15    5.40
   6   1  -2    3.97    6.19
   6  -7   2   -3.50    4.64
  -1  -6   2   12.16   11.79
   1   6   2   12.47    8.19
   6   1  -2   -9.17    6.20
   1  -7  -2    6.63    4.37
   1   6   2    0.27    6.29
   7  -6  -2    4.14    5.63
  -7   6  -2   -2.42    4.69
  -1  -6   2   -5.20    6.24
  -1   7  -2    7.86   10.02
   1  -7   2    4.74    5.47
   1   6  -2    2.57    6.19
  -6  -1   2    4.97    9.79
   7  -1  -2    7.52   12.01
  -7   6   2    2.94    4.64
   1  -7   2    2.33    3.94
   6  -7  -2    1.58    9.80
   1  -7   2    9.65    3.75
   6  -7  -2   -1.18    7.22
   1  -7   2    0.43    5.88
  -7   6   2    3.39    7.81
  -1  -6  -2   12.60   10.50
   6   1   2    4.26    4.92
  -6   7  -2   -1.96    3.71
  -1   7   2   -7.64    5.91
  -6   7  -2   12.93    9.06
   1   6  -2   -0.77    4.14
   1  -7   2   -0.66    5.72
  -7   1  -2  -15.93   18.17
  -6   7  -2    5.12    8.73
  -6  -1   2   -4.98    6.15
   7  -6   2   -7.63   10.37
   7  -1  -2  -10.08    6.10
   7  -6   2  -10.37    6.89
  -6  -1   2    1.17    6.34
   1  -7   2    1.76   10.95
   6   1   2   -2.96    9.45
  -7   1  -2    4.00    9.29
   6  -7  -2    4.67    4.44
   6  -7  -2  -12.96   10.75
   7  -6   2    6.22   12.09
  -7   1  -2    7.29    9.91
   7  -1  -2   12.04    7.20
   6   1   2   -6.57    6.03
   7  -1  -2    5.22    6.93
  -6  -1   2   14.03    7.23
   6  -7  -2   -1.55    5.31
  -1  -6  -2   -3.51    6.43
  -7   6   2   -1.91    5.70
   1   6  -2   -3.51    7.82
  -6   7  -2  -12.92    9.44
   6   1   2   -3.00    7.46
   6   1   2    3.48    5.90
  -7   1  -2    5.81    6.79
  -1  -6  -2  -11.41    6.29
  -6  -1   2    3.51   11.07
  -1  -6  -2    9.15    6.82
   6   1   2    2.85   11.64
   7  -6   2   -3.01    5.34
   7  -6   2    3.18    5.95
   1  -7   2    3.24    7.85
  -1  -6  -2   -2.47    5.83
   7  -1  -2  -14.02    8.44
   1   6  -2   13.24    8.47
   7  -1  -2   12.51   11.23
  -7   1  -2    5.57    6.04
  -7   0  -2  111.68   16.89
   7   0  -2  106.46   15.47
   7  -7  -2   82.93   18.25
  -7   7   2   89.06   11.85
  -7   0   2  102.91   11.54
   0   7  -2   93.06   10.14
   7  -7  -2   93.90    9.95
   0  -7  -2  110.89   12.40
   0   7   2   94.58   13.88
  -7   0  -2  108.51   11.49
   0  -7  -2   84.83    9.87
   7  -7  -2  109.38    9.36
   7  -7   2   99.08   18.18
   0  -7   2  119.12   11.23
   7   0   2   95.37   10.72
   0   7   2  103.36    8.36
  -7   0  -2   93.61   14.19
  -7   0  -2  118.44   14.82
  -7   0   2  114.67   15.78
   0  -7  -2  101.11    6.73
  -7   7  -2  122.31   13.80
   0  -7  -2   99.41    7.89
   0   7   2  102.87    7.16
   0   7   2  119.25   10.96
   7   0  -2  105.45   12.27
   7   0   2  105.32   15.22
   7  -7   2   94.04   10.12
   7   0   2   85.12   13.17
  -7   0  -2   91.68   10.78
   7  -7   2  114.06   16.46
   7   0   2  116.75   11.85
   7  -7   2  117.93   13.31
   7   0  -2  122.27   17.16
   0   7  -2   91.40    8.62
   7   0  -2   98.99   11.84
   7  -7  -2   89.64    9.03
   0  -7  -2   94.23    9.73
   0  -7  -2   78.34   10.37
   0  -7  -2  108.73   14.72
   7   0   2  107.56   11.74
  -7   7  -2  112.36    9.01
   0  -7   2  109.63   11.24
   0  -7   2  104.88   10.18
   0   7  -2   84.07    9.16
   0  -7   2  135.31   17.50
   7  -7  -2  113.86   12.33
  -7   0   2  105.81   11.02
   7   0  -2   92.01    9.83
  -7   7  -2  136.35   16.88
   7  -7   2   99.03    8.70
  -7   0  -2  107.16   11.17
  -7   0   2  109.56   16.51
   7  -7  -2   94.39   14.48
   7   0   2  114.19   12.32
   0  -7   2   90.34   11.65
  -7   0   2   95.79   10.26
   7   0  -2   96.86   10.96
   4   4   2    0.26    3.84
   4   4  -2   -7.23    5.42
  -4  -4  -2    0.96    6.75
   4   4   2    4.79    6.21
   4   4   2   -0.02    8.21
  -8   4   2    3.50    6.74
   4  -8   2   -6.21    7.80
   4  -8  -2   10.87    8.18
  -8   4   2  -13.43   10.90
   4  -8   2   -4.26   11.14
   8  -4  -2  -11.15    9.77
   8  -4   2   -3.35    6.75
   4   4  -2   -1.68    7.02
   4   4  -2    6.71    9.99
  -8   4   2   -5.32    7.88
   8  -4   2   15.95   11.46
  -4  -4  -2   -2.25    5.59
  -4  -4   2    8.01    8.14
   8  -4   2    4.90    8.36
   4   4  -2    4.49   11.87
  -8   4  -2    2.84    8.87
   4  -8  -2    2.29    3.72
   8  -4  -2    4.84    6.76
   4   4   2   16.30    7.23
  -8   4  -2    5.53   11.64
   8  -4   2   -2.06    7.07
  -4  -4  -2   -5.61    8.57
  -8   4  -2    2.47    6.87
   4  -8  -2   -0.89    5.93
   8  -4   2   -1.90   10.66
   8  -4  -2   11.87    7.42
  -4  -4  -2   11.96    7.60
   8  -4   2    5.53    7.18
  -8   4  -2   -8.29    5.71
   4  -8  -2    6.71   12.59
  -4  -4   2   -1.95    7.11
   8  -4  -2   -1.39    7.38
  -4  -4   2   15.49    7.78
  -4  -4   2  -11.58    6.07
   4   4  -2    7.02    7.39
   4  -8   2   -0.66    4.78
   8  -4  -2   -3.49    8.19
  -4  -4   2    0.76   10.95
  -4  -4  -2   -2.89    8.98
   4   4   2   -7.84    8.09
   4  -8   2    7.79    7.90
   4   4   2   -9.81    6.86
  -4  -4  -2  -15.03    6.43
   4  -8   2   -8.06    4.80
  -8   4   2    8.54    6.59
  -8   4  -2    8.13   10.58
   8  -4  -2   15.11   12.16
   5   3  -2   89.25   11.06
   5   3  -2  123.03   15.56
   8  -3   2  172.68   15.22
   3  -8  -2  144.39   14.29
  -8   3   2  157.45   13.04
   8  -3   2  112.92   15.71
  -8   5  -2  123.60   10.30
  -8   3   2  142.74   12.50
   5  -8   2  120.26    9.46
  -3  -5   2  124.86   12.31
   3  -8  -2  147.83   14.26
   5  -8   2  109.65   18.25
   3   5   2  146.88   11.67
  -3  -5   2  128.49   18.14
   8  -5  -2  141.65   12.25
   5  -8   2  144.96   14.03
   3  -8  -2  148.04    9.92
   8  -3   2  126.99   16.38
   3  -8  -2  117.10   11.31
   5  -8   2  129.13    9.53
   8  -5  -2  110.73   11.06
  -8   5  -2  137.73   12.66
   5  -8   2  141.95   11.15
  -5  -3  -2  104.11   11.73
   5   3  -2  153.05   18.26
   8  -3   2  126.09   12.14
  -5  -3  -2  131.97   12.26
   8  -3   2  110.51   14.93
  -8   3   2  145.02   15.11
   5   3  -2  103.87   15.44
   5   3  -2  123.63    9.22
   3   5   2  131.60   14.24
  -5  -3  -2  135.23   12.46
   3   5   2  134.09   12.58
   8  -3   2  128.01   12.85
   8  -5  -2  171.60   20.68
   8  -5  -2  158.23   14.75
   8  -5  -2  117.01   18.10
   3   5   2  132.23   14.84
   8  -5  -2  116.71   12.26
   3  -8  -2  103.25   11.62
  -5  -3  -2  120.20   16.08
  -5  -3  -2  117.89   15.88
  -8   5  -2  122.00   13.77
   3   5   2  115.94   11.42
  -3  -5   2  139.29   12.73
   3  -8  -2  139.66    9.63
   5   3  -2  129.98   12.23
   5  -8   2  139.66   14.77
  -8   3   2  166.93   19.89
   3  -8  -2  131.52   18.39
  -5  -3  -2  149.04   13.45
  -3  -5   2  146.13   13.85
  -8   5  -2  102.52   14.87
  -8   3  -2  118.55   11.82
   8  -3  -2  124.91   16.81
  -8   5   2  135.98   18.88
   8  -3  -2  123.56   17.42
   5  -8  -2  115.55   10.06
   5   3   2  139.73   13.09
   3  -8   2  114.83    9.68
   5  -8  -2  121.05   13.99
   8  -3  -2  125.73   14.51
   5  -8  -2  128.14   11.44
  -5  -3   2  112.54   15.67
   8  -5   2  142.70   19.74
  -3  -5  -2  114.09   10.97
   5  -8  -2  127.81   19.20
   8  -5   2  102.26   15.46
   5  -8  -2  134.25    8.50
   8  -5   2  155.02   15.21
   8  -3  -2  144.34   13.81
   3  -8   2  140.70   13.59
   8  -3  -2  109.52   12.43
  -8   3  -2  133.87   17.42
   5  -8  -2  168.81   14.78
   3  -8   2  112.86   12.93
   3   5  -2  128.26   15.54
  -8   5   2  136.89   12.76
   3   5  -2  162.54   13.28
  -5  -3   2  102.45   11.16
  -3  -5  -2  131.39   13.11
  -5  -3   2  136.08   12.41
  -8   3  -2  129.54   15.32
   8  -3  -2  106.37   11.45
   5   3   2  178.03   18.63
   5   3   2  127.66   10.07
  -8   3  -2  161.46   12.75
  -5  -3   2  159.45   14.81
  -3  -5  -2  145.38   15.91
   5   3   2  139.40   12.04
   3   5  -2  138.67   12.40
   3  -8   2  125.83   10.85
  -3  -5  -2   96.76   12.72
   5   3   2  128.69   15.03
   5  -8  -2  119.93   18.33
  -8   3  -2  124.56   16.27
  -8   5   2  138.18   11.74
   8  -5   2  133.20   12.81
   3   5  -2  142.15   12.57
   8  -5   2  152.57   14.40
  -3  -5  -2  147.47   13.11
  -8   5   2  146.16   13.04
   3  -8   2  129.05   19.10
  -5  -3   2  131.24   15.71
   5   3   2  127.02   12.01
  -6  -2  -2  498.97   25.69
   8  -6  -2  585.47   33.51
  -6  -2  -2  522.95   28.62
   6  -8   2  560.23   30.38
  -8   6  -2  554.88   25.36
   2  -8  -2  518.02   27.37
  -2  -6   2  601.02   26.04
   8  -2   2  511.12   32.50
   6  -8   2  542.35   35.21
  -2  -6   2  520.06   26.27
   2   6   2  529.44   22.33
   2   6   2  535.12   24.92
   2  -8  -2  606.53   24.94
   8  -2   2  566.84   26.98
   6  -8   2  590.58   21.11
   6   2  -2  529.89   26.32
   6   2  -2  562.39   25.91
   8  -2   2  528.51   25.41
   8  -6  -2  537.50   34.86
   6  -8   2  509.78   33.74
  -8   2   2  576.14   25.88
   2  -8  -2  568.03   27.06
  -8   2   2  583.50   25.03
   2  -8  -2  523.79   30.98
   2  -8  -2  580.00   22.61
  -8   2   2  565.96   25.40
   6   2  -2  564.55   23.21
   8  -2   2  568.60   31.55
  -2  -6   2  566.20   25.81
  -8   6  -2  553.14   22.96
   6  -8   2  559.17   21.38
  -6  -2  -2  554.06   26.08
  -8   6  -2  529.45   32.64
  -8   2   2  504.88   29.88
   8  -6  -2  549.82   25.73
   2   6   2  506.72   27.08
   8  -6  -2  550.71   25.90
  -2   8  -2  544.39   19.32
  -6  -2  -2  525.60   32.22
   8  -6  -2  497.04   25.18
  -2  -6   2  545.19   27.11
   2  -8  -2  570.00   22.96
  -8   6  -2  528.49   26.17
   2  -8  -2  500.96   24.91
   6  -8   2  591.38   28.05
  -8   2   2  606.98   32.07
   6   2  -2  540.86   25.05
  -2   8  -2  593.62   22.89
   6  -8   2  583.87   23.28
   6   2  -2  515.86   34.08
   8  -2   2  549.02   29.56
  -2  -6   2  551.85   34.83
  -6  -2  -2  560.94   28.04
   2  -8  -2  534.91   22.94
  -2   8  -2  541.37   20.18
   8  -2   2  521.04   26.31
   2   6   2  602.67   25.85
   8  -6  -2  594.93   25.19
  -8   6   2  564.83   25.83
   6  -8  -2  526.83   21.07
  -8   6   2  545.20   23.22
   6  -8  -2  544.40   23.16
   6  -8  -2  542.33   34.46
   8  -6   2  565.62   26.49
  -2  -6  -2  601.73   26.01
   8  -2  -2  551.78   24.64
  -2   8   2  541.32   24.04
   6  -8  -2  566.57   26.75
   8  -6   2  559.91   25.59
   2  -8   2  542.71   27.51
   8  -2  -2  555.46   31.10
  -8   2  -2  517.56   24.93
   2   6  -2  529.83   23.22
   8  -2  -2  575.20   31.65
   6   2   2  553.57   32.66
   2  -8   2  526.56   22.43
  -2  -6  -2  532.97   26.68
  -6  -2   2  578.06   25.31
  -6   8  -2  619.15   28.67
  -6  -2   2  537.83   29.47
  -8   6   2  510.39   24.43
   6   2   2  543.60   31.96
   6  -8  -2  589.89   29.94
  -2  -6  -2  524.78   31.62
   8  -6   2  541.79   33.50
   8  -6   2  543.22   34.85
   6   2   2  530.77   25.65
   6   2   2  583.18   23.59
  -2  -6  -2  570.79   26.89
   8  -2  -2  574.58   26.78
   8  -6   2  547.33   26.25
  -8   2  -2  551.64   30.78
   2  -8   2  513.43   27.60
   2  -8   2  554.39   23.68
  -2  -6  -2  544.02   26.54
   8  -2  -2  566.13   31.13
   2   6  -2  526.21   24.93
   2  -8   2  553.44   32.64
   2  -8   2  522.12   23.93
   8  -2  -2  602.22   27.65
   8  -6   2  560.01   24.78
  -8   2  -2  573.24   32.75
   2  -8   2  533.46   23.76
  -8   2  -2  601.78   32.01
   6  -8  -2  583.65   23.60
  -8   2  -2  537.29   25.71
  -6  -2   2  517.08   25.93
   1  -8  -2   22.58   11.66
  -7  -1  -2    7.99   10.34
  -7  -1  -2   25.83   10.60
   7  -8   2    4.55   12.03
   7  -8   2    9.48    9.36
   1  -8  -2    7.49    9.26
   8  -7  -2    8.38    7.38
   7   1  -2   13.16    8.65
  -1   8  -2   21.47    6.42
  -7   8   2   10.90    9.02
  -8   7  -2   12.96    5.75
   8  -7  -2   13.05    6.91
   7  -8   2   16.24   11.32
   7  -8   2   19.61   12.82
  -7  -1  -2   21.06   12.42
  -8   1   2   20.88   12.72
   7  -8   2   10.46    6.13
  -1  -7   2   23.94   14.10
   1  -8  -2   16.73    6.24
   1  -8  -2   15.51    6.63
  -1   8  -2   18.67    5.89
   8  -7  -2   12.16    8.10
  -8   1   2    6.66    7.78
   8  -1   2   16.00   11.11
   8  -1   2   16.25    8.58
   1   7   2   12.77    4.94
   8  -7  -2   15.60    7.51
  -8   7  -2   23.47   11.93
   7  -8   2   11.19    5.48
   8  -7  -2    2.60   13.16
   7   1  -2   22.20   13.99
   7   1  -2    3.81    6.70
  -8   7  -2    2.26    8.73
  -1  -7   2   28.77   10.10
   8  -1   2    8.55    9.00
   8  -1   2   19.23   13.28
  -8   1   2   21.96    8.44
   1   7   2   12.69    9.29
  -8   7  -2    6.36    6.65
  -1   8  -2   15.21    4.67
   7   1  -2   17.39   11.93
   1  -8  -2   16.26    5.61
   8  -1   2    8.70    7.92
   8  -7  -2    3.04   12.17
   7  -8   2    7.47    4.72
  -7  -1  -2    5.23    7.22
  -1  -7   2    4.27    8.34
  -1  -7   2   26.13    8.33
   1  -8  -2   20.62    9.58
   1  -8  -2   20.99    4.95
  -8   1   2    3.37   10.81
   8  -1   2    6.76    8.52
  -8   1   2   24.05    7.91
   1   7   2   18.75    7.89
  -7  -1  -2   10.57    7.77
  -1   8  -2    3.70   10.51
   1   7   2   26.95    6.49
   7   1  -2    9.38    8.04
  -1  -7   2   22.55    8.99
  -1  -7  -2   22.85   12.35
   8  -1  -2   15.56    7.83
   1  -8   2   15.80    7.47
   8  -1  -2   25.42    8.00
   8  -1  -2    2.59    9.79
  -1  -7  -2    3.98    7.84
   1  -8   2    7.99    6.72
  -8   7   2    3.26    8.86
  -8   1  -2   12.95    8.28
  -8   1  -2   15.43    7.88
   1  -8   2    7.50    3.42
  -7  -1   2   10.37    7.74
   8  -7   2    6.13   13.34
   8  -7   2    8.09    6.55
  -8   1  -2   16.59   18.95
   1   7  -2   20.82    7.38
   1   7  -2    9.59   10.13
   1  -8   2   14.15    7.11
   7  -8  -2   15.26    5.34
   7   1   2   32.35   12.53
   1  -8   2   32.09   13.11
   1   7  -2   18.24    8.07
  -1   8   2   14.26    7.52
   7   1   2   11.32    6.84
   7   1   2   25.76    9.13
   7  -8  -2   25.96   11.28
  -7  -1   2   15.84    8.32
  -1  -7  -2   17.02    8.88
  -8   1  -2   10.18    7.06
  -7   8  -2   13.98    9.58
   7   1   2   16.99    8.41
   1  -8   2   15.62    9.71
  -8   7   2   16.66    4.64
  -8   1  -2   33.51   12.22
   8  -1  -2   18.92   12.10
  -7  -1   2   12.19   10.78
   7   1   2   12.48   13.18
  -7  -1   2   11.79    9.73
   7  -8  -2   23.20    8.95
   7  -8  -2   -7.37   12.34
   8  -7   2    9.35   12.36
   8  -7   2   20.43    8.85
   1  -8   2   16.03    3.67
   1   7  -2   23.47    5.64
  -1  -7  -2   12.99    7.88
   8  -7   2   22.44    8.30
  -1  -7  -2   22.32    6.99
  -7  -1   2   10.54    7.40
   8  -1  -2   13.04   11.79
   7   1   2   12.85    7.41
   7  -8  -2    8.81    6.25
   8  -7   2   13.91    6.63
   8  -1  -2    6.02    8.73
  -8   1  -2   30.54   11.71
   8  -8  -2  155.27   12.65
   8   0  -2  143.64   18.82
  -8   0  -2  199.78   23.20
   8   0  -2  160.91   15.80
   8   0   2  142.81   13.62
  -8   0  -2  156.81   14.81
   0  -8  -2  145.23   14.65
   0  -8  -2  162.11   15.09
  -8   0   2  183.99   15.08
  -8   8   2  190.50   16.16
   8   0   2  150.32   14.59
   8  -8   2  154.30   12.32
  -8   0  -2  177.86   19.07
   0  -8  -2  164.46   14.12
   8  -8   2  169.80   18.64
   0   8   2  159.25   13.06
  -8   0  -2  143.24   13.85
   0   8  -2  149.54   18.10
   0   8  -2  175.82   13.83
  -8   0  -2  128.77   21.40
   8   0  -2  182.45   20.67
  -8   0  -2  128.69   13.33
  -8   0   2  160.23   20.95
   0   8   2  152.64    8.93
   0   8  -2  175.80   10.71
   8  -8   2  151.90   15.28
  -8   8  -2  146.67   15.62
   8  -8   2  174.82   23.32
   0   8   2  153.72    8.56
   8   0   2  187.75   20.61
   8  -8   2  154.57   13.27
   0   8  -2  158.80   13.52
   8   0  -2  142.00   13.44
   8   0   2  134.35   13.72
   0  -8   2  184.87   21.83
   0  -8   2  173.41   14.81
   8  -8  -2  168.76   23.00
  -8   0   2  153.75   18.48
   0   8   2  152.38   19.87
   8   0   2  158.37   23.07
   8   0  -2  157.23   15.46
   8   0   2  125.71   13.21
   8   0  -2  143.91   14.03
   8  -8  -2  154.60   13.62
   0  -8  -2  150.32   13.91
   8  -8  -2  145.03   17.43
   0  -8   2  167.37   16.72
   8  -8  -2  153.49   12.48
   0  -8   2  172.88   15.45
  -8   0   2  142.32   13.76
  -8   8  -2  148.71   10.76
   0  -8  -2  176.82   20.45
  -8   0   2  118.52   11.66
   8  -8  -2  147.36   14.54
  -5  -4  -2   46.75   10.98
  -9   4   2   31.09   10.18
   5   4  -2   55.18   10.59
  -4  -5   2   26.65    7.64
   4  -9  -2   26.03   13.72
  -5  -4  -2   58.12   10.38
   5   4  -2   44.54    4.55
   4  -9  -2   52.93    6.11
  -4  -5   2   58.95   13.37
   5  -9   2   41.96    6.18
   5   4  -2   43.24   12.98
   9  -5  -2   44.82    8.81
   9  -5  -2   49.80   10.49
  -4  -5   2   18.15    9.16
  -9   5  -2   38.94    9.77
   9  -4   2   34.92    9.75
  -5  -4  -2   54.66   10.47
   4   5   2   47.13   10.38
   4  -9  -2   48.24   10.15
   4  -9  -2   37.81    9.01
  -9   5  -2   43.36   10.71
   4   5   2   48.37    8.07
   5  -9   2   38.19   10.07
   5  -9   2   42.05    6.68
   9  -4   2   51.40   14.24
   5  -9   2   35.56   11.13
  -4  -5   2   24.93   12.78
   9  -4   2   30.77    9.57
   4  -9  -2   37.97    8.35
   5   4  -2   35.55   12.24
   5   4  -2   42.89    9.41
  -9   5  -2   64.21   14.26
   5   4  -2   35.67    7.96
   9  -5  -2   69.36   16.11
  -5  -4  -2   32.68   10.13
   9  -5  -2   38.13    9.50
   5  -9   2   56.85   16.08
   9  -4   2   54.34   12.40
   5  -9   2   35.33    6.86
   4   5   2   54.68   14.61
  -5  -4  -2   43.73   13.74
  -9   4   2   42.80    9.12
  -9   4   2   30.87    8.26
   5   4  -2   51.93    4.70
   9  -4   2   39.79    9.10
  -9   4   2   49.86   15.61
  -9   5  -2   37.62    7.93
   9  -5  -2   48.29   11.64
   9  -4   2   28.65   12.75
  -4  -5   2   41.06    9.94
   4  -9  -2   38.42   10.25
   9  -5  -2   38.44   14.41
   4   5   2   42.78   10.85
   4   5   2   18.45    8.18
   5  -9  -2   41.99    8.02
   5   4   2   32.18    9.09
  -4  -5  -2   63.59   12.34
  -5  -4   2   38.84    9.93
   9  -5   2   15.58    8.90
  -9   5   2   31.86    8.28
   4   5  -2   41.16    9.22
   5  -9  -2   43.06   10.69
   4  -9   2   59.93   11.95
   4  -9   2   42.26   15.72
   5   4   2   39.71   12.16
   5  -9  -2   41.72    5.62
   4  -9   2   37.45    6.93
  -9   4  -2   32.95   14.13
   9  -5   2   38.68    8.34
   4   5  -2   44.78    9.79
  -5  -4   2   28.15    9.10
   9  -4  -2   40.15   14.34
   4  -9   2   52.92    7.36
  -5  -4   2   60.19   10.90
   5  -9  -2   35.58    7.37
   4   5  -2   33.84    7.47
   9  -4  -2   39.57    9.89
  -4  -5  -2   40.95    9.63
   9  -5   2   48.36    9.81
  -9   5   2   30.17    8.43
   5  -9  -2   44.25   14.12
  -9   4  -2   47.78   12.27
   9  -4  -2   63.81   15.63
  -9   4  -2   56.66   10.10
   5  -9  -2   33.77   10.36
   4   5  -2   42.44   12.51
   5   4   2   52.36   11.75
  -9   5   2   46.45   10.13
   9  -5   2   48.13   14.97
  -4  -5  -2   43.65    9.67
  -4  -5  -2   29.69    9.45
  -5  -4   2   27.55    9.10
   5   4   2   47.28    8.23
  -9   4  -2   40.98    8.60
   9  -5   2   46.38    9.99
  -4  -5  -2   13.51    8.43
   9  -4  -2   40.16   10.71
   9  -4  -2   47.11   11.76
   9  -5   2   44.71   13.21
   5   4   2   56.74   10.72
   5   4   2   37.39    5.58
   4   5  -2   50.45   11.84
  -9   5   2   50.20   16.13
  -9   4  -2   34.12   13.37
  -5  -4   2   42.42   13.29
   9  -4  -2   46.13    8.84
   5  -9  -2   49.66   15.92
   9  -3   2    4.36    7.05
   3  -9  -2    3.95    5.30
   6  -9   2   -4.49   13.35
   9  -6  -2    3.69    8.36
   3  -9  -2  -12.13    6.25
  -3  -6   2    6.25   13.23
   6  -9   2    0.67    4.43
  -9   6  -2  -19.40   10.15
   9  -6  -2    6.52   12.18
   3   6   2    8.44    7.82
   6   3  -2   -8.43    7.47
   3  -9  -2   -2.09   11.32
   3  -9  -2   -3.95    4.79
  -9   3   2   -1.64    7.37
  -3  -6   2   -4.00    8.33
  -9   3   2   -1.04    6.82
   9  -6  -2    1.26   13.45
   9  -3   2   -2.70   10.66
   3  -9  -2   -6.52    9.05
   3   6   2   -2.12    8.05
  -3  -6   2    4.42    8.31
   3   6   2    6.79    8.13
   9  -3   2    6.29    7.92
   6  -9   2    6.80    5.84
  -9   6  -2    3.05    7.79
   6  -9   2   14.86    9.41
   3  -9  -2    7.42    9.28
   3  -9  -2   -0.25    7.13
   6   3  -2   -6.30   13.37
   9  -6  -2   20.08    9.44
   6   3  -2   24.21   14.52
   9  -3   2    2.53   10.87
  -9   3   2  -10.32    8.98
  -9   6  -2    3.57    5.90
   3   6   2   -1.33    5.08
  -9   3   2    3.58   11.97
  -6  -3  -2    6.63    9.22
   6   3  -2    2.12    4.63
  -3  -6   2    7.32    9.73
  -9   6  -2   -0.31    7.73
  -6  -3  -2    6.73    7.46
   9  -6  -2   -8.98    6.34
   3  -9  -2   -4.20    6.56
  -3  -6   2   -7.79    7.05
  -6  -3  -2   -6.66   11.26
  -6  -3  -2    7.44    7.97
   6  -9   2   -3.19    4.25
   9  -3   2    7.38    8.92
   6   3  -2   -3.74    8.39
   9  -6  -2   -7.89    6.74
   9  -3   2   10.45   10.59
  -6  -3  -2    3.62    8.25
   6   3  -2    3.56    7.11
   3   6   2   -1.21    7.36
   6  -9   2   -4.93    8.62
   3  -9   2    2.52    6.09
  -3  -6  -2   -3.82    8.71
   9  -3  -2    9.25   11.17
   9  -6   2    9.28    7.99
   3  -9   2    6.44   12.83
   9  -6   2   -0.85    7.54
   6   3   2    4.20    7.14
  -9   3  -2    4.62   11.90
   9  -3  -2    0.74    7.84
  -6  -3   2   -5.88    7.49
  -9   6   2    9.68    6.93
   6  -9  -2   -4.50    5.31
   3   6  -2   -1.16    7.54
   3   6  -2  -12.40    8.37
   3   6  -2    1.55    6.22
   9  -3  -2    1.41    8.84
  -9   3  -2    1.92    7.68
   6  -9  -2  -12.88    7.62
  -6  -3   2  -13.62    6.97
   9  -3  -2   -9.51   11.27
   3  -9   2   -0.19    6.26
   6   3   2  -14.36    6.96
  -9   6   2   -2.33    6.21
   6   3   2  -16.55   10.88
  -6  -3   2    1.51    7.10
   9  -6   2   10.73   13.47
   6  -9  -2   -3.96    5.13
  -3  -6  -2   -5.33    8.47
   9  -3  -2   -8.20   10.16
  -3  -6  -2   -1.03   10.80
  -9   3  -2    3.59    6.68
  -9   6   2   -1.65    7.47
  -9   3  -2   13.83   12.33
   6  -9  -2   -4.29   12.48
  -6  -3   2  -11.30    9.51
  -9   3  -2   -8.92   10.17
   9  -6   2  -20.90   11.26
   6  -9  -2    1.37    4.31
  -6  -3   2   -0.81   10.22
   6  -9  -2    0.91   11.88
   9  -6   2   -2.10    6.65
   3  -9   2   -3.32    6.02
  -3  -6  -2   -3.15    7.31
   9  -3  -2    9.90    7.55
   3   6  -2   -5.21    9.53
   6  -9  -2    7.70    9.56
   9  -6   2   -6.10    7.30
   6   3   2    4.03    5.23
   6   3   2    3.84   11.35
  -3  -6  -2    1.95    8.10
   6   3   2   -3.34    7.34
   3  -9   2   19.25    9.78
   7   2  -2    7.57   12.38
  -2  -7   2   15.16    8.96
   2  -9  -2   23.63    5.83
   2   7   2   -2.85    8.40
   2   7   2    2.00    6.97
   9  -2   2   26.75   11.95
   9  -7  -2   -0.50    7.75
   7   2  -2    4.23    7.19
  -2  -7   2   24.32   16.03
   7  -9   2    7.73   12.59
   2  -9  -2   -1.61    9.74
   9  -2   2   13.02   10.75
  -9   2   2    6.33    8.02
   9  -7  -2    2.72    6.76
   9  -2   2   12.68   10.14
   9  -7  -2   20.10    8.55
  -7  -2  -2   10.09    8.15
  -2  -7   2    5.58    8.96
   7   2  -2    4.76    8.80
  -2  -7   2   12.66    7.62
  -2   9  -2    2.15    5.85
  -9   7  -2   18.07    9.46
  -9   2   2    5.45    7.15
   7   2  -2   -2.91    5.50
   7   2  -2   14.77   16.89
   9  -2   2    1.39    7.90
   7  -9   2   19.36    4.82
   7  -9   2   -3.02    8.62
   7  -9   2   13.42   13.55
   7   2  -2    9.07    8.26
   2  -9  -2   14.25    9.42
  -7  -2  -2    6.74   11.61
   2  -9  -2    7.86    8.98
   7  -9   2   18.69   10.60
  -7  -2  -2    2.66    8.53
  -7  -2  -2   17.53    9.57
   2  -9  -2   19.05    6.87
   9  -7  -2   -3.38   12.16
   2  -9  -2   10.86    6.04
   2  -9  -2    1.33    5.90
   2   7   2   17.55    5.71
   9  -2   2   24.23    9.56
   7  -9   2    5.00    4.92
  -9   2   2    5.77    7.32
  -2  -7   2   17.26    9.39
   2   7   2   -1.26    7.18
   9  -2   2   11.13    8.25
   9  -7  -2    4.36    7.67
  -9   7  -2    5.97    7.41
   2  -9  -2    0.45   11.59
  -7  -2  -2   15.43    9.09
   9  -7  -2   16.44   14.53
   7  -9   2    0.86    5.85
  -9   7  -2    6.25    5.91
  -9   2   2   13.51   10.19
  -9   2   2    8.21   11.71
  -9   7   2   12.02    5.96
  -7  -2   2   23.19    9.20
   7  -9  -2   12.26   12.48
  -7  -2   2   -3.90    7.82
   9  -2  -2   -3.43    8.35
  -2   9   2   11.44    7.06
  -9   7   2    7.65    8.97
  -9   2  -2   12.49   12.14
   7   2   2    3.42    7.49
   7  -9  -2   16.20   10.07
  -7  -2   2    7.66   12.95
  -2  -7  -2    0.23    8.77
   7   2   2   15.84    8.80
   7  -9  -2   11.77    5.74
  -9   2  -2   13.20   11.90
   9  -2  -2    9.11    9.03
   7  -9  -2    9.84    8.83
   2  -9   2    9.06    5.14
   2   7  -2   17.60   10.50
  -7  -2   2   12.69    8.19
   9  -7   2   17.08    7.75
   2   7  -2    5.10    8.60
   9  -2  -2    7.33   11.21
  -9   2  -2   -3.31    7.26
   2   7  -2    1.64    5.65
   2  -9   2   -1.98    9.72
   2   7  -2    3.37    7.41
   9  -2  -2    8.25    7.73
   7   2   2   15.59    8.93
   9  -7   2   -0.26   12.60
   9  -2  -2   49.26   13.69
  -7   9  -2    8.49    9.90
   2  -9   2   11.48    7.06
   2  -9   2    3.53    6.84
  -9   2  -2    8.47    8.28
   9  -2  -2   18.24   12.33
   9  -7   2   -4.03    7.08
   9  -7   2    9.88    8.84
  -9   2  -2    3.57   10.85
  -2  -7  -2    5.64    6.32
  -7  -2   2    4.78   10.04
   7   2   2   18.16   12.16
  -2  -7  -2    4.88    8.26
  -2  -7  -2    5.47    8.72
   2  -9   2    7.42    9.35
   9  -7   2    1.13   14.37
  -9   7   2   10.57    7.90
  -2  -7  -2   11.81   13.42
   2  -9   2   18.66    6.88
   9  -7   2   12.52    8.41
   2  -9   2    9.92    5.16
   7  -9  -2   -3.11   11.93
   7  -9  -2    5.31    5.00
   2  -9   2   21.61   13.05
  -1   9  -2   63.09    6.04
   8  -9   2   56.16   13.23
  -9   1   2   63.40   11.19
  -9   8  -2   59.25    8.20
  -1  -8   2   47.35   10.19
  -8  -1  -2   63.73   12.84
   9  -8  -2   60.56    9.33
   9  -1   2   76.04   11.66
   1  -9  -2   68.47   15.36
  -9   1   2   56.05   13.99
   8   1  -2   81.02   17.76
   1   8   2   61.84    7.73
  -1  -8   2   66.82   10.45
   1  -9  -2   60.24   10.73
  -1  -8   2   57.40   10.83
   1  -9  -2   54.62    5.63
  -1   9  -2   45.96   14.17
   8   1  -2   69.47   11.35
   1  -9  -2   65.72    6.24
  -1  -8   2   62.33   11.83
   9  -8  -2   47.76   10.53
   9  -1   2   69.48   11.88
   1   8   2   68.55    6.84
   8  -9   2   61.96    8.93
  -8  -1  -2   41.88    9.93
   8  -9   2   48.33   16.79
   8  -9   2   46.67   16.48
  -8  -1  -2   42.33   15.01
   1   8   2   51.96    9.88
  -8   9   2   60.96   11.48
   1  -9  -2   63.94    9.61
  -8  -1  -2   55.20   10.16
   9  -8  -2   82.64   15.87
  -9   1   2   55.89   10.43
  -9   1   2   68.28   10.18
   8   1  -2   36.54   16.18
   1  -9  -2   44.14   11.52
  -9   8  -2   41.29   11.36
   8   1  -2   63.20   11.84
  -1   9  -2   46.97    8.24
   8  -9   2   64.05    6.85
   8  -9   2   67.15    7.59
   1  -9  -2   62.73    9.55
   9  -8  -2   80.73   19.11
   9  -8  -2   50.95    9.12
   8   1  -2   68.27    9.53
   9  -1   2   37.67   10.85
  -1   9  -2   68.48    7.30
  -9   1   2   45.81   14.46
  -1  -8   2   67.35   18.28
   9  -8  -2   37.00    7.82
   9  -1   2   49.20   10.86
   1   8   2   68.45   13.53
   8   1  -2   41.73    8.72
   9  -1   2   74.14   14.19
   8  -9   2   43.84   11.69
   9  -1   2   78.89   16.46
  -8  -1  -2   67.31   11.07
  -8  -1   2   71.82   17.35
   8   1   2   80.85   11.34
   9  -8   2   69.46   18.20
  -8  -1   2   72.13   14.54
   1  -9   2   49.48    8.84
   8  -9  -2   56.57   17.57
  -1  -8  -2   49.89    9.20
  -9   1  -2   51.01   14.44
  -8  -1   2   64.36   10.16
   1  -9   2   61.50   15.76
   8   1   2   68.03   15.52
  -1  -8  -2   68.92   11.92
   9  -8   2   53.15    9.54
  -9   1  -2   57.17   14.00
   9  -1  -2   52.32   11.00
   9  -8   2   54.58    9.14
  -1   9   2   55.73    9.65
   1   8  -2   64.60   14.21
   1   8  -2   67.70    7.88
   8  -9  -2   50.25    8.47
   1  -9   2   50.86   11.96
   8   1   2   41.93   14.02
  -8  -1   2   50.37   10.88
   9  -1  -2   60.99   11.73
   1  -9   2   50.29   12.32
   9  -1  -2   91.43   16.35
   8  -9  -2   63.08   11.58
  -9   1  -2   59.61   11.24
  -1  -8  -2   50.34   15.26
   9  -1  -2   54.81   15.06
   8   1   2   54.52    8.98
   1  -9   2   45.51    8.90
   9  -1  -2   58.21   12.46
  -9   1  -2   63.81   11.02
   9  -1  -2   88.57   11.51
   8  -9  -2   62.72   13.25
   8   1   2   36.87   10.85
   8  -9  -2   69.74    8.09
  -1  -8  -2   53.03    9.39
  -1  -8  -2   59.67   12.12
   9  -8   2   54.33   14.80
   8   1   2   37.60   10.39
   1   8  -2   54.53    9.33
   1   8  -2   50.16    9.65
   9  -8   2   52.93    8.96
   8  -9  -2   73.79    8.16
  -8   9  -2   57.21   12.31
  -9   8   2   44.23   10.84
  -9   1  -2   52.18   10.38
  -9   1  -2   48.21   14.93
   9  -8   2   41.22   10.40
  -9   0  -2    6.50    9.18
   0   9  -2   19.56   11.81
  -9   0  -2   10.20   11.07
  -9   0   2    9.14    8.13
   9  -9  -2   10.36    6.31
   9   0  -2    0.62    9.56
   9  -9   2    6.72    7.07
   9   0   2   12.60    8.67
  -9   0   2    8.57    7.91
   0   9  -2    1.67    6.11
   9   0   2    5.09   13.02
   9   0   2    9.86    8.74
   0  -9  -2   -2.39    7.40
  -9   0  -2    3.92    8.73
  -9   0   2    1.73   11.70
   9  -9  -2   20.57    7.23
   9  -9   2   13.34    9.42
   9   0   2   27.09   10.19
  -9   0  -2    5.96    8.29
   0  -9   2    5.00    8.18
   9   0  -2   13.56    8.57
   0  -9   2   15.68    8.86
   9   0   2   13.64    8.26
   0  -9   2   -1.44   14.21
   0  -9  -2   21.96   13.18
  -9   9   2    9.30    9.60
   9   0  -2   32.68   13.90
  -9   0  -2    4.79   12.26
   0   9   2    1.15    7.62
   9  -9  -2   18.95    6.59
   0  -9   2    2.09   10.39
   0   9  -2   -4.49    6.55
   9  -9   2    1.70    5.80
   9   0  -2   -4.63    7.98
   9  -9  -2    3.17   11.06
  -9   0   2   12.16   11.80
   9   0   2   34.36   12.35
   9  -9   2    8.51   11.52
   9   0  -2  -11.74   12.67
   0  -9  -2    8.99    8.83
   0  -9  -2    3.15    9.42
   9   0  -2   -1.87   13.86
  -9   0   2   -7.72    7.57
  -9   9  -2   10.78   10.31
   9  -9   2    9.44   13.89
   0  -9  -2    0.99    7.28
   9  -9  -2   11.41    8.57
   0   9  -2    7.62    4.76
   0  -9   2   11.26    7.60
   9  -9  -2   32.26   17.70
  -5  -5  -2   32.73   11.22
   5 -10   2   22.60   15.13
 -10   5   2   42.43    9.33
   5 -10  -2   37.88    7.46
 -10   5  -2   45.69    9.87
   5 -10   2   31.94    6.52
  -5  -5  -2   20.70    9.59
 -10   5  -2   45.46    9.06
  -5  -5   2   22.88    8.50
   5   5  -2   24.90    9.20
  10  -5  -2   43.02   15.87
  10  -5  -2   34.27    9.85
  -5  -5   2   22.03    9.81
  -5  -5   2   17.31   10.66
   5 -10   2   29.80   10.24
   5   5  -2   30.28   12.73
   5 -10  -2   23.56    9.54
  10  -5   2   27.08    9.88
   5 -10  -2   45.25    9.85
  10  -5   2   23.83    8.21
   5 -10  -2   25.85   15.45
 -10   5   2   24.65    8.83
   5   5   2   24.78    9.40
   5   5  -2   36.48   13.00
 -10   5   2   37.31   15.40
   5   5   2   25.21    8.76
   5 -10  -2   36.31    5.49
   5 -10  -2   38.66    8.05
   5 -10  -2   46.95   11.66
   5   5   2   43.04   13.50
   5   5   2   40.75    9.58
 -10   5  -2   55.09   11.51
  10  -5   2   44.19   15.71
  10  -5   2   35.11   12.01
   5 -10  -2   33.63   13.89
  10  -5  -2   32.49    8.88
  10  -5   2   15.44   13.76
   5 -10   2   19.52    6.22
  -5  -5   2   27.35    9.93
   5   5  -2   48.34   10.15
  -5  -5  -2   31.83   10.38
  -5  -5   2   26.00   12.73
   5   5  -2   55.48   10.41
  -5  -5  -2   29.91   10.84
  -5  -5  -2   31.94    9.60
  10  -5  -2   30.36   11.01
 -10   5   2   36.65   10.56
   5 -10   2   29.15    6.03
  10  -5  -2   48.39   15.17
  10  -5  -2   20.54    9.68
   5 -10   2   40.20   10.95
  10  -5   2   20.37    9.60
 -10   6  -2    0.13    8.18
  -6  -4  -2   11.61    9.55
  10  -6  -2   -4.94    8.45
  -4  -6   2    5.00    8.95
 -10   4   2   -3.37    7.52
   6   4  -2  -18.22   10.93
   6 -10   2   -1.72    8.81
   4 -10  -2    6.28    5.00
   6 -10   2   -2.55    4.87
   6 -10   2    7.52    5.43
  10  -6  -2    0.52    7.66
   6   4  -2   -0.06    8.08
  10  -6  -2    4.38   12.81
  -6  -4  -2   11.91    8.32
   4   6   2   13.53    8.02
   4   6   2    4.15   10.75
  10  -4   2   10.09   12.76
  10  -4   2    5.00    9.31
   4   6   2    9.66    6.95
   6   4  -2   -1.59    8.43
   6 -10   2    8.45    4.74
  10  -4   2   10.93   10.75
  10  -4   2    7.85   12.06
 -10   6  -2   -5.74    6.18
  -4  -6   2   12.10    9.42
 -10   4   2   17.07   10.37
 -10   6  -2   17.20    9.35
  -4  -6   2    0.58   11.74
   4 -10  -2    3.85   12.94
  10  -6  -2    9.42    7.81
 -10   4   2   -4.21   12.81
   4 -10  -2   25.21   10.40
  -6  -4  -2   11.03    9.99
  10  -6  -2   12.50   14.35
   4 -10  -2    9.38    8.00
   4   6   2   -8.42    8.11
  -6  -4  -2   -2.90    8.66
  10  -4   2   -8.50    7.80
   6   4  -2    6.60    3.82
   6   4  -2    9.44    7.31
  -4  -6   2    0.88    8.21
  -4  -6   2   -5.94    7.59
   6 -10   2   -0.34    9.17
  -6  -4  -2   -0.37    8.75
   6   4  -2    5.56   13.16
   4 -10  -2   -2.47    9.40
  10  -6  -2   -6.67    8.66
   6   4  -2    1.13    3.82
   6 -10   2   -7.27   13.71
 -10   4   2   12.85    7.83
   4 -10  -2    0.64    7.11
  10  -4   2   -5.91    7.49
   4 -10  -2   13.14    7.44
  -6  -4   2    6.30    9.52
  -6  -4   2   18.97    8.65
  10  -4  -2    9.97    8.52
  10  -6   2   -1.95   11.88
  10  -6   2   11.14   14.31
  10  -6   2    8.73    8.96
   6 -10  -2    7.83    4.43
  10  -4  -2   20.99   13.78
   4 -10   2  -10.46    8.59
   4   6  -2    6.64   10.68
  10  -4  -2   10.97   10.16
   4   6  -2   -1.49    8.24
   4 -10   2   11.20    6.34
 -10   6   2   20.96   15.50
  -6  -4   2    1.82    8.49
   6 -10  -2    3.80   12.52
  -4  -6  -2    0.92    8.99
 -10   4  -2    6.22   13.46
   6 -10  -2   -2.34    5.51
 -10   6   2   -1.34    7.24
   6 -10  -2   -6.73    8.92
  10  -6   2    1.78    8.55
 -10   4  -2   10.96    7.89
   6   4   2    1.46    7.06
  -4  -6  -2    8.30   10.50
   6   4   2   -3.68    8.20
  10  -4  -2   25.65   13.83
   6   4   2    3.09    7.80
   6   4   2   -5.34    9.78
  -6  -4   2    2.30    8.32
   6   4   2    6.98    4.96
   4 -10   2    1.96    5.88
   4   6  -2    4.28    6.70
  -4  -6  -2    8.87    8.73
  -4  -6  -2   -4.40    8.49
  10  -4  -2    5.35   10.89
  10  -4  -2    0.84    7.70
   6 -10  -2    6.12   13.40
  -4  -6  -2   -9.97    7.37
  10  -6   2    7.37    9.00
   6 -10  -2    6.01    6.05
   4 -10   2   -1.99   13.78
 -10   6   2    1.02    7.98
   4 -10   2   -5.51    7.26
   6   4   2   -9.45    9.51
   6 -10  -2   -2.13    8.70
  10  -6   2  -10.04    7.19
 -10   4  -2   -5.15    9.49
  -6  -4   2    4.48   10.66
 -10   6   2    3.13    7.17
 -10   4  -2    0.88    7.17
   7 -10   2   33.01    5.80
  10  -7  -2   24.00    8.08
  10  -7  -2   16.29    8.82
 -10   3   2   17.11    8.47
  -7  -3  -2   15.37    9.43
  10  -7  -2   27.18   10.18
   3   7   2   34.42    9.51
   7 -10   2   22.63    5.37
  -3  -7   2   13.80    8.16
   7   3  -2   21.95    6.22
   7   3  -2   34.45    6.44
  10  -3   2   34.71   13.48
  10  -7  -2   25.48   13.89
   7 -10   2   34.82    7.14
   7 -10   2   22.94   16.34
  10  -3   2   22.34   12.19
   3 -10  -2   28.05    6.93
   3   7   2   23.50   10.89
 -10   7  -2    7.19    7.59
  -3  -7   2   16.14   10.05
   7 -10   2   16.11   10.19
   7 -10   2    5.80   12.67
  10  -3   2   40.96   11.03
 -10   3   2   22.54   13.51
   3 -10  -2   38.62    7.62
  -7  -3  -2   26.59   11.06
   7   3  -2   23.28    8.44
   3 -10  -2   26.24    6.64
  -7  -3  -2   38.91   14.96
 -10   7  -2   25.46   10.24
  10  -3   2   22.97   12.95
  10  -7  -2   15.82    9.71
   7   3  -2   50.24   11.31
  -3  -7   2   25.73   10.70
   7   3  -2   26.36    9.46
  10  -3   2   25.31   10.01
   3   7   2   27.33    6.48
   7   3  -2   40.91   15.61
   3 -10  -2   26.84   14.72
  10  -7  -2   32.86   15.82
  -7  -3  -2   25.23    9.67
   3 -10  -2   33.41   11.55
   7 -10   2   33.59   11.29
  -7  -3  -2   32.20    9.69
 -10   7  -2   25.32    8.84
   7   3  -2    0.54   15.32
  -3  -7   2    4.37    9.65
   3 -10  -2   47.19    9.71
  10  -3   2   15.69    8.33
   3 -10  -2   26.36    8.03
   3   7   2   25.84    8.71
  -3  -7   2   35.83   14.80
   3 -10  -2    7.05   10.62
 -10   3   2   38.11   10.28
 -10   3   2   32.10   12.07
   7   3   2   20.49    9.86
 -10   7   2   12.20    7.85
   3 -10   2   33.10    7.26
  -7  -3   2   11.49    9.06
  -3  -7  -2   16.93    8.57
   3 -10   2   19.07    7.04
 -10   3  -2   36.18   14.14
 -10   7   2   34.40    7.85
  -7  -3   2   30.89   10.87
  -3  -7  -2   53.16   14.05
  10  -3  -2   23.91    9.26
   3   7  -2   35.10    8.10
 -10   7   2   23.02    9.77
 -10   3  -2   22.48    9.38
   7 -10  -2   35.64    6.91
   3 -10   2   16.02    9.75
   3 -10   2   41.66   15.69
   7   3   2    7.44   13.08
   7   3   2   15.17   12.06
  -3  -7  -2   16.12    8.56
  10  -3  -2   12.19   13.23
   3   7  -2   26.16   11.84
  10  -3  -2   31.47    9.03
   3 -10   2   20.84    6.67
   7 -10  -2   27.25   14.20
  10  -7   2   35.06   10.25
  10  -7   2   26.69   15.99
  10  -7   2   22.77    9.01
  10  -3  -2   19.52   11.54
  10  -7   2   16.44    8.82
  -7  -3   2   31.19    9.41
   7   3   2   21.36    8.22
   7 -10  -2   44.15   14.64
  -7  -3   2   28.23   12.80
  -3  -7  -2   14.70    9.23
   7 -10  -2   27.15   10.96
  10  -7   2   28.94    8.21
   7   3   2   33.85    7.00
   7 -10  -2   24.56    5.33
  10  -7   2   28.12   13.82
   3 -10   2   35.52   12.16
  -7  -3   2   29.24   12.04
  -3  -7  -2   18.48   10.09
   3   7  -2   39.23    9.81
 -10   3  -2   24.85    8.77
   7 -10  -2   36.55    7.25
  10  -3  -2   23.67   10.90
   7 -10  -2   34.12    9.89
  10  -3  -2   41.42   14.23
   3   7  -2   18.34   10.00
   3 -10   2   30.15    7.95
   7   3   2   25.36   10.01
 -10   3  -2   57.77   13.91
  -2  -8   2    2.61    9.41
  -2  10  -2  -11.47    5.68
  10  -2   2    0.27    9.41
   2   8   2    0.65    4.92
  10  -8  -2   -4.23   12.29
   2 -10  -2  -12.03    8.89
   8   2  -2   15.96    6.96
  10  -2   2   -6.37    9.96
 -10   8  -2    7.65    6.34
   2   8   2    4.96    6.85
  10  -2   2    8.82    9.28
   8   2  -2   -6.82    7.70
  10  -8  -2   10.21   15.82
   8 -10   2   13.51   14.34
  10  -8  -2    5.26    8.59
   2 -10  -2    0.83    6.24
 -10   2   2   23.25    8.39
   2 -10  -2    8.66    5.20
  -2  -8   2   -5.73    8.01
   8 -10   2    2.32    9.72
  -8  -2  -2   14.35   14.38
  -2  -8   2  -16.23    8.35
   8 -10   2    9.26    9.77
   8 -10   2   11.43   14.60
   2 -10  -2   -1.63    8.24
   2 -10  -2   -1.68    6.18
 -10   8  -2   -8.10    6.64
  10  -8  -2   10.63    7.78
  10  -2   2   -8.77   11.08
   8   2  -2  -37.43   16.98
   8   2  -2    7.07   14.02
   2   8   2   -0.33    9.75
  -8  -2  -2    9.07    8.65
   8 -10   2    4.55    6.12
   8   2  -2    5.28    9.30
  10  -8  -2   -6.38    6.96
   8   2  -2   13.84    8.69
  -2  -8   2   10.51    9.73
 -10   2   2    4.42    8.02
  10  -2   2    5.60    8.69
  -8  -2  -2    9.42    8.90
   2 -10  -2   16.36   11.35
   8 -10   2   -2.54    4.67
 -10   8  -2   -1.61    9.58
 -10   2   2   -3.23    8.49
   2 -10  -2    1.57    5.71
   2   8   2    1.52    8.16
  -2  -8   2   21.64   16.89
  -8  -2  -2    6.81   10.52
   2 -10  -2   -3.44   12.62
 -10   2   2   15.09   13.35
  10  -2   2   32.41   12.63
  -8  -2  -2    4.70    8.64
   8 -10   2   -0.09    4.43
  10  -8  -2    4.34    7.98
 -10   2   2   -4.42   10.94
   8   2   2   -1.93    8.45
  -2  -8  -2   -8.02    8.99
  10  -8   2    0.59    7.20
   8   2   2    7.12   12.22
   2 -10   2   -5.56    9.34
 -10   8   2    0.38    6.60
   8 -10  -2    4.39    4.67
  10  -2  -2  -15.22   10.93
  10  -8   2   -8.85   12.06
   2 -10   2  -19.63   12.06
   8 -10  -2   -3.99   12.18
  -2  -8  -2   15.86   14.15
   2 -10   2   -5.03    6.12
  -2  -8  -2    5.59    9.50
   2   8  -2   12.30    7.71
  -8  -2   2   -3.34   10.65
  -8  -2   2    4.81   11.17
   2   8  -2    8.34    8.15
  -8  -2   2    5.29    8.96
   8 -10  -2    6.86    9.96
   8   2   2    0.19    8.96
 -10   2  -2    8.69    8.39
   2 -10   2   11.67    4.47
   2   8  -2    6.10   10.90
  -2  -8  -2    4.45    7.68
  -2  -8  -2   -9.63    8.51
 -10   2  -2    6.81    8.61
  -8  10  -2   -0.42    9.48
   8   2   2    0.31    6.68
 -10   2  -2    6.94   12.32
  10  -8   2  -15.92   14.64
   8 -10  -2    2.42    5.73
   8 -10  -2   -1.42    5.19
   8 -10  -2   11.45    8.53
 -10   8   2   -4.68    4.86
  10  -2  -2   -2.88    6.54
  -8  -2   2    3.78    8.04
 -10   8   2    2.66    9.80
 -10   2  -2    2.86   12.17
  10  -8   2   15.50    9.40
   2 -10   2    5.34   10.76
   2   8  -2   -4.40    5.09
  10  -2  -2   -1.08    8.02
  10  -2  -2    9.91   11.50
  10  -8   2   -4.08    7.58
   8   2   2    6.32    8.52
  -8  -2   2    1.60    8.12
  10  -2  -2   -9.84   10.65
  -2  10   2    3.00    7.09
  10  -8   2   -2.03    7.15
   8 -10  -2    8.12   13.55
  10  -2  -2    1.77    9.96
   8   2   2  -33.92   14.90
   2 -10   2    7.54    6.90
   2 -10   2   -8.36    4.19
  10  -1   2   14.02   12.19
   9 -10   2   -3.72    5.96
  10  -9  -2   -9.17   15.15
   9   1  -2    5.61   12.66
   9 -10   2   15.50   12.28
  10  -9  -2   -1.06    6.95
   9 -10   2  -10.97   13.72
   1 -10  -2    1.79    7.68
  -9  -1  -2   -3.80   11.71
   1   9   2   -0.74    7.98
   1 -10  -2   -4.21   10.96
   1 -10  -2   -1.53   13.19
 -10   1   2   15.72   12.44
   9 -10   2    0.69    6.73
  -9  10   2   15.15    9.72
   9 -10   2   -6.06    9.74
  -9  -1  -2    3.22    8.38
 -10   9  -2    2.87   10.56
 -10   9  -2   -2.29    5.19
   1   9   2   15.50   10.93
  10  -1   2    3.61    8.95
  -1  -9   2    6.06   10.76
  -1  -9   2   -0.71    7.87
   1 -10  -2    9.89    8.96
   1   9   2    1.30    4.89
  -9  -1  -2   -3.10    7.90
  -9  -1  -2    9.17    9.06
  -1  10  -2    2.97   11.35
 -10   1   2    7.45    8.39
 -10   1   2   13.65   13.09
  10  -9  -2   21.36    9.66
  -1  -9   2    1.64   16.76
   9   1  -2   -2.26    7.68
   1 -10  -2   -2.05    7.22
   9 -10   2    5.48   14.00
  10  -1   2    7.45    7.30
   9   1  -2   10.65    7.93
   9   1  -2   -4.20    8.43
  10  -9  -2   -2.89    6.59
  10  -1   2   -4.01    8.51
   9 -10   2    8.80    5.54
  -9  -1  -2    7.20   11.33
   9   1  -2   16.40   10.21
  10  -1   2   49.06   15.79
  10  -1   2   20.35   10.79
  -1  -9   2    9.46    9.48
 -10   1   2    5.03    8.35
  10  -9  -2   11.41   12.49
   9   1  -2  -17.32   16.76
  -1  10  -2    1.30    6.61
 -10   1   2   15.64   13.12
  10  -9  -2   20.24    7.46
  -9  -1   2   15.99   12.39
  10  -9   2   -1.09   12.08
   9   1   2    2.59    7.37
  10  -1  -2   -1.54    9.58
 -10   1  -2   -7.81   13.10
   1   9  -2    9.43    5.60
  -1  -9  -2   -9.67    9.74
  -9  -1   2   -5.95    8.15
   1 -10   2   -1.66    9.98
  -9  -1   2    7.49    8.64
  10  -9   2    4.55    7.28
   9 -10  -2   10.48    6.13
 -10   1  -2    1.37   11.31
   9   1   2   24.58   15.59
  10  -9   2   -3.40   14.53
   9 -10  -2   -4.53    9.93
  10  -1  -2    6.05    9.73
   9 -10  -2    9.30   14.95
   1 -10   2   26.85   11.85
 -10   9   2   10.53   10.13
   9 -10  -2   -1.81    8.30
  -1  -9  -2   16.85    8.73
  10  -9   2   -1.42    7.17
  -1  -9  -2    9.21   15.66
  -1  -9  -2    0.42    7.65
   1 -10   2    0.03    7.93
  10  -1  -2   16.50   13.11
   9   1   2   -6.26   12.28
   1   9  -2    8.80    7.24
  10  -1  -2   -5.03    8.17
  10  -1  -2    2.22   12.77
   9 -10  -2    6.54    5.59
   9   1   2   11.72   10.33
   1 -10   2   -2.34   13.91
 -10   1  -2   -7.55    8.56
  10  -1  -2    6.09    7.85
  -9  -1   2   -1.75   10.76
   1   9  -2   10.75   12.12
   1 -10   2    0.02    7.44
  -9  -1   2    3.87    8.10
 -10   1  -2   -2.88    8.16
  -1  10   2    8.45    7.68
   9 -10  -2   13.16    6.20
   9 -10  -2    8.89    6.77
   1   9  -2    9.53    7.78
   1 -10   2   -2.57    6.86
   9   1   2    2.35    8.34
  -1  -9  -2   -6.61    9.20
  -9  10  -2   13.60   10.56
  10  -9   2    1.92    6.88
  10  -9   2   -3.91    8.59
 -10   0  -2  208.41   19.14
   0  10  -2  233.81   24.17
   0  10  -2  199.78   13.14
   0 -10  -2  211.38   20.85
   0  10  -2  196.03   11.76
   0 -10   2  198.15   20.17
  10   0  -2  236.59   21.05
 -10   0   2  209.17   17.93
  10   0  -2  238.02   27.27
  10   0  -2  194.12   22.60
 -10  10  -2  208.14   20.04
 -10  10   2  268.18   21.12
   0 -10  -2  209.10   24.76
  10 -10   2  204.20   19.08
  10 -10   2  242.10   14.97
  10   0   2  190.62   18.49
   0 -10  -2  217.31   17.76
  10 -10   2  249.76   28.12
   0 -10   2  201.99   17.75
   0  10  -2  196.69   16.36
  10 -10   2  206.07   26.88
  10 -10  -2  223.21   16.40
 -10   0  -2  216.20   18.82
 -10   0  -2  199.43   23.20
 -10   0  -2  216.34   18.68
  10 -10  -2  206.49   33.33
  10   0   2  253.42   26.65
  10   0   2  164.83   22.23
 -10   0   2  211.47   24.57
 -10   0  -2  177.10   20.31
  10 -10  -2  208.09   19.45
 -10   0   2  219.50   24.73
 -10   0   2  291.61   26.09
  10   0   2  189.05   18.75
   0 -10  -2  186.35   17.69
 -10   0   2  199.87   18.23
  10 -10  -2  198.27   14.84
  10 -10  -2  187.43   14.79
  10   0  -2  161.31   17.64
  10 -10   2  215.43   28.07
   0 -10   2  222.42   19.67
   0 -10   2  204.22   26.59
   0  10   2  204.92   16.82
  10 -10  -2  202.30   27.92
  10   0   2  286.80   26.43
  10   0  -2  225.13   20.31
  10   0  -2  192.91   19.18
  10 -10   2  182.56   15.80
  10   0   2  233.25   19.80
   5 -11  -2   76.31   12.09
 -11   5   2   83.53   14.61
  11  -6  -2   69.46   14.56
   6   5  -2   48.69   14.94
  -5  -6   2   67.99   12.84
   5 -11  -2   65.69   13.08
   6 -11   2   58.33    7.09
  11  -5   2   72.46   16.81
 -11   5   2   68.16   19.56
  11  -5   2   50.52   11.57
  11  -5   2   52.06   16.95
   6   5  -2   59.69   13.08
   5 -11  -2   73.24   17.99
  11  -6  -2   64.08   13.06
 -11   6  -2   71.03   10.31
  -5  -6   2   94.82   16.58
  -6  -5  -2   69.24   13.23
  -6  -5  -2   90.05   13.51
   5   6   2   64.38    9.99
   6 -11   2   53.48   11.94
   6   5  -2   33.17   10.64
  -5  -6   2   62.49   12.07
   5 -11  -2   70.41   10.84
   5 -11  -2   33.37   15.31
   5   6   2   66.92   13.56
 -11   6  -2   37.06   10.58
   5   6   2   71.92   11.93
   5   6   2   68.63   12.68
 -11   5   2   77.16   11.84
   5 -11  -2   71.36    7.65
   5 -11  -2   81.76   12.21
   6 -11   2   59.31   19.20
  11  -5   2   77.82   13.43
  11  -5   2   86.00   14.95
  -6  -5  -2   71.18   13.08
  11  -6  -2   69.72   11.74
  11  -6  -2   72.51   18.00
  -6  -5  -2   63.08   12.26
  11  -6  -2   83.27   21.39
 -11   5   2   44.73   10.51
  -5  -6   2   83.15   12.76
 -11   6  -2   69.14   13.04
   6 -11   2   74.46   13.56
   6   5  -2   73.64   16.73
   6   5  -2   39.30    9.03
   6 -11   2   68.89    8.86
   6 -11  -2   83.82   14.81
  11  -5  -2   75.51   13.59
   6   5   2   68.04   13.92
  -5  -6  -2   70.57   20.07
   5   6  -2   56.06   15.99
   5 -11   2   72.70   13.92
   6 -11  -2   67.82    9.28
   5 -11   2   73.48   11.84
 -11   6   2   58.23   10.98
   6 -11  -2   98.19   18.78
   6   5   2   60.33   15.14
  -5  -6  -2   80.88   13.69
  -6  -5   2   64.31   12.06
 -11   6   2   70.83   11.18
   6 -11  -2   71.55    7.11
   6 -11  -2   79.74   18.47
  11  -6   2   71.21   18.16
  11  -5  -2   51.98   11.28
   6 -11  -2   76.42   12.12
   6 -11  -2   55.93    8.69
   5 -11   2   63.47   18.50
 -11   5  -2   77.10   11.49
  11  -6   2   80.30   12.95
  11  -6   2   60.61   17.26
  11  -6   2   56.29   12.39
  -6  -5   2   56.26   12.15
   6   5   2   96.35   13.70
  11  -6   2   71.83   12.67
   6   5   2   69.94   12.40
   6 -11  -2   71.11   12.81
 -11   6   2   85.84   12.02
   6   5   2   57.73   11.60
   5   6  -2   68.20   11.70
   5 -11   2   72.84    8.83
  11  -5  -2   55.67   16.74
   5 -11   2   64.10    9.10
   6   5   2   80.25    6.32
  -5  -6  -2   70.87   12.89
   5 -11   2   61.47    7.86
  -6  -5   2   79.31   15.57
 -11   5  -2   79.68   21.01
   5   6  -2   64.15   14.64
   5   6  -2   68.54   16.93
  11  -5  -2   43.24   11.48
 -11   6   2   68.94   19.54
  -5  -6  -2   58.51   12.01
 -11   5  -2   74.45   11.86
  -4  -7   2    7.16   10.07
  11  -4   2  -10.19   11.96
 -11   4   2   10.95    9.16
 -11   7  -2    5.95    8.86
   7   4  -2   -7.24    9.25
  11  -7  -2    4.72    8.95
  11  -7  -2   -7.08   13.12
  11  -4   2   15.64   11.52
   4 -11  -2    5.48    8.06
   7   4  -2   -6.49    6.73
 -11   7  -2    0.52    6.75
   4 -11  -2    3.70   14.06
   7   4  -2    0.29    9.65
   4   7   2   -0.53    6.50
  -7  -4  -2   13.93    9.71
   4 -11  -2    0.67    5.28
  11  -7  -2    7.53   14.79
   7   4  -2   21.47   14.06
   7 -11   2   12.16   12.94
   7   4  -2   -8.77   12.50
  11  -4   2   -3.98   11.37
   4 -11  -2    0.24   10.76
  11  -7  -2   -5.55    8.28
   4   7   2    6.71   10.41
   7   4  -2   -5.37    4.47
  -4  -7   2   16.06   13.23
 -11   4   2   -7.88   12.95
  11  -4   2   15.86   11.07
 -11   7  -2  -11.26    8.41
   7 -11   2    1.30    9.85
  -4  -7   2   -8.81    9.42
  11  -4   2  -13.17    8.19
   7 -11   2  -15.05    8.71
  -7  -4  -2   -7.56   11.90
  -7  -4  -2    1.43    9.87
  -7  -4  -2    9.97   10.09
   4 -11  -2    3.26    7.28
  11  -7  -2   10.60    9.77
  -4  -7   2  -11.00    9.36
   4   7   2   -0.61    8.75
   7 -11   2    5.93   15.55
   7 -11   2    2.49    5.78
   7 -11   2   -1.46    4.66
 -11   4   2    2.99   10.77
  -7  -4  -2    8.87    9.67
 -11   4   2    6.14    8.33
   4 -11  -2    3.44   10.19
   4 -11  -2   12.26    7.52
  -4  -7  -2  -26.08    8.52
   4 -11   2    4.89    6.68
  11  -4  -2   10.98    8.38
  -7  -4   2    5.33   13.03
  11  -4  -2   -3.18   13.00
   4 -11   2   10.86    7.01
 -11   7   2   -4.35    8.50
   7 -11  -2   19.83    9.88
  11  -4  -2   16.42   15.57
  11  -4  -2   -4.96    9.47
   4   7  -2    2.29    7.20
   4 -11   2   -0.25   14.27
   4 -11   2    1.89   10.67
   7 -11  -2    4.18    5.77
  11  -7   2  -16.43   12.72
 -11   4  -2   -8.45   13.32
   4   7  -2    6.30    8.81
  11  -7   2   12.94   17.72
   4 -11   2   17.66   11.27
 -11   7   2   -7.32    6.89
  -7  -4   2   -8.60   10.64
   7 -11  -2   -3.10    9.31
  -7  -4   2    7.29    9.52
  -4  -7  -2   16.84   11.73
   7 -11  -2   -6.02    9.15
 -11   7   2    1.34    7.43
  11  -7   2   -6.71    8.22
   7 -11  -2    4.11    6.00
  11  -4  -2    8.07   10.54
  -7  -4   2    8.55    9.62
 -11   4  -2   -0.44   12.98
   4 -11   2    1.14    7.34
  -7  -4   2   -2.84    8.67
   4   7  -2    2.08   10.98
   7   4   2  -15.77   10.64
 -11   4  -2   10.11    8.14
 -11   4  -2   -1.30    8.47
   7   4   2   -1.49    9.54
   7   4   2  -14.63    7.71
   7   4   2   -1.98   13.35
   4 -11   2   11.84    6.72
  11  -7   2    0.61    8.82
  -4  -7  -2    0.63    9.05
   7 -11  -2    1.35   13.67
   7   4   2   -2.80    5.14
  11  -7   2    2.01    9.73
   7   4   2   -8.09    6.98
   7 -11  -2   -1.13    4.20
  11  -3   2  344.72   25.76
 -11   3   2  345.05   31.10
   3 -11  -2  308.42   24.43
  11  -3   2  375.80   28.49
  -3  -8   2  315.35   23.42
  11  -8  -2  320.24   22.55
   3   8   2  378.02   23.65
   3 -11  -2  347.93   19.37
  11  -8  -2  322.80   33.02
  -8  -3  -2  349.01   23.66
  11  -3   2  329.16   28.63
  11  -8  -2  353.97   32.86
   8   3  -2  373.45   33.38
   8 -11   2  297.60   30.83
  -8  -3  -2  330.68   23.66
  11  -8  -2  350.34   34.05
 -11   8  -2  336.88   20.60
 -11   3   2  408.67   37.26
   3   8   2  334.03   18.11
   3 -11  -2  347.14   18.69
   8 -11   2  325.84   26.02
  -8  -3  -2  265.95   27.21
   8 -11   2  350.06   17.25
  -8  -3  -2  332.32   25.15
 -11   8  -2  361.65   23.98
  11  -8  -2  377.96   23.75
   8   3  -2  374.48   18.45
   8   3  -2  382.90   27.62
  -3  -8   2  362.24   30.36
 -11   3   2  385.39   34.50
 -11   3   2  335.90   20.90
   8   3  -2  320.66   22.44
   8 -11   2  402.64   24.97
   3 -11  -2  328.89   21.49
 -11   8  -2  350.52   19.77
  -8  -3  -2  369.59   25.60
  -3  -8   2  357.84   23.81
   8   3  -2  266.90   28.85
   3 -11  -2  361.11   30.68
  11  -3   2  366.21   27.94
   3   8   2  310.04   24.51
  11  -3   2  326.48   27.31
   8   3   2  339.82   18.59
 -11   3  -2  383.59   22.56
  11  -8   2  332.52   21.49
   8   3   2  289.24   24.11
   3 -11   2  318.55   31.88
 -11   3  -2  310.14   21.40
   3 -11   2  324.18   17.77
   8 -11  -2  338.08   25.46
   3 -11   2  342.09   29.67
   8   3   2  329.95   22.43
  11  -3  -2  357.97   29.21
  -8  -3   2  361.46   22.66
 -11   8   2  325.14   17.54
   8   3   2  333.93   30.68
   3 -11   2  313.12   25.94
  11  -3  -2  297.11   25.84
 -11   3  -2  363.97   29.29
  11  -3  -2  356.40   28.45
 -11   8   2  358.97   21.00
  -8  -3   2  333.29   23.66
   8 -11  -2  332.40   30.64
 -11   3  -2  357.48   30.91
   8 -11  -2  351.40   18.25
  -3  -8  -2  329.28   26.47
  -3  -8  -2  275.61   28.17
  11  -8   2  278.63   29.56
  -3  -8  -2  313.62   23.09
  -8  -3   2  328.87   26.98
   3   8  -2  345.72   21.56
  11  -8   2  370.05   24.68
   3   8  -2  319.26   18.57
  -8  -3   2  382.30   31.42
   8   3   2  327.92   22.71
  11  -8   2  343.76   33.26
  11  -3  -2  356.65   22.38
   3 -11   2  325.85   21.98
   3   8  -2  339.16   27.24
  -3  -8  -2  362.56   27.54
   8 -11  -2  341.67   15.96
 -11   8   2  318.07   23.18
   8 -11  -2  353.02   31.14
  -8  -3   2  349.15   24.00
  11  -8   2  346.46   31.18
   2   9   2   22.93    6.26
   9   2  -2   18.70   10.54
   2 -11  -2   19.05   15.18
  11  -9  -2   32.00   18.04
  -9  -2  -2   21.47   10.14
   9   2  -2   25.88    9.04
  11  -9  -2   28.47    9.30
   2 -11  -2   49.84   13.75
 -11   2   2   18.49   14.28
   9   2  -2   23.15    9.96
   9   2  -2    7.56   15.20
  -2  -9   2   23.29   11.17
  -9  -2  -2   10.44   11.88
   2   9   2   37.68   13.12
  11  -2   2   11.92   10.04
 -11   2   2   40.17   15.92
   9 -11   2   18.42   10.63
   9 -11   2   23.71   17.06
 -11   2   2   32.40   10.16
 -11   9  -2   25.07    7.62
  11  -2   2   43.74   13.48
  -2  -9   2   16.98   17.51
  -2  11  -2   10.21    7.35
  11  -2   2   29.15   12.40
  -2  -9   2   12.59   12.02
  11  -9  -2   34.02    9.67
  -2  -9   2   19.13    9.91
  11  -2   2   23.81   11.77
  -9  -2  -2   20.85   10.08
   9 -11   2   25.30    7.07
   2 -11  -2   24.79    8.88
   2   9   2   21.05    9.87
  11  -9  -2   14.54   13.84
   2 -11  -2   29.77    8.44
 -11   2   2   24.86   10.53
  11  -2   2   45.08   16.31
  -9  -2  -2   29.06   13.24
   9   2  -2   35.64    8.32
   2 -11  -2   39.38   12.94
  -9  -2  -2   35.61   10.84
   9 -11   2   25.02   16.28
 -11   9  -2   12.27   13.02
   9 -11   2   15.96   11.17
   2 -11  -2   22.17    9.67
  11  -9  -2   45.41   12.35
 -11   2  -2   23.45    9.96
   2 -11   2   11.58    7.70
  -2  -9  -2   33.09   11.57
  -9  -2   2    9.27    8.89
   9   2   2   37.61    8.73
   9   2   2   31.00   11.82
  -9  -2   2   33.38   17.73
  11  -2  -2    7.01   10.23
   9 -11  -2   22.63    6.03
   9 -11  -2   20.15   10.16
   2   9  -2   27.93    9.60
  -9  -2   2   15.12    9.94
  -2  -9  -2   45.98   16.76
  11  -9   2   10.58   13.88
   2 -11   2   28.64   17.07
  11  -9   2   58.19   12.93
  11  -9   2   41.90    9.01
 -11   2  -2   28.87   13.74
 -11   2  -2   30.35   14.47
  11  -9   2   26.13   17.47
   9 -11  -2   25.13   16.15
 -11   9   2   43.78   12.28
   9   2   2   25.37   14.72
   9 -11  -2   23.79   15.41
   9 -11  -2   20.66    6.02
   9 -11  -2   21.56   11.35
  -9  -2   2   44.76   12.11
   9   2   2    5.97    8.98
  -2  -9  -2   19.83   12.42
  11  -2  -2    3.30   11.66
  11  -2  -2   17.50   13.23
  -9  -2   2   34.22   13.83
  11  -2  -2   26.02   13.89
   2   9  -2   19.39    6.57
   9 -11  -2   30.90    7.25
  -2  11   2   30.33    8.80
 -11   2  -2   31.60   13.50
   2 -11   2   32.46   12.96
   2 -11   2   20.24   13.05
   9   2   2   18.18   11.13
   2   9  -2   13.14   12.50
  11  -9   2   18.12    8.98
  11  -2  -2   65.95   18.04
  11  -1   2   13.72   10.12
  11  -1   2    0.72   10.19
   1 -11  -2    1.23    7.75
   1 -11  -2    4.97   12.36
 -11   1   2   13.78   10.45
   1 -11  -2   13.04    9.68
  10   1  -2  -12.69   12.69
   1  10   2   -5.57    7.83
  11  -1   2   -8.29   10.45
  11 -10  -2   -1.22   12.48
  -1 -10   2   -4.68    9.47
  11  -1   2    5.75   14.57
  11 -10  -2  -13.57    7.02
  10 -11   2    1.29   10.91
 -11  10  -2  -18.51    9.97
  10   1  -2   -6.52    9.42
  10 -11   2    5.72    6.41
 -10  -1  -2    3.99   11.62
 -11   1   2  -11.32   14.19
  10   1  -2    0.95    8.78
 -10  -1  -2   -3.03    8.56
  10 -11   2    5.66   10.79
  11 -10  -2    6.13    9.42
  11 -10  -2    4.59    7.25
  -1 -10   2   -1.33    8.51
  -1 -10   2  -13.52   19.50
  10   1  -2   -7.70    7.52
 -10  -1  -2   -2.09    9.22
  -1  11  -2   16.00    7.81
  10 -11   2  -19.79   13.33
  10   1  -2   21.17   11.59
 -11   1   2    4.15   13.36
 -10  -1  -2  -10.47   11.00
   1 -11  -2  -28.28   13.03
  -1 -10   2  -15.35   10.81
  11  -1  -2   21.50   14.26
   1 -11   2  -32.12   14.50
  11  -1  -2   -3.87    9.66
  -1 -10  -2  -33.46   17.33
   1 -11   2   -3.13    8.13
  11  -1  -2  -14.16    8.94
  10 -11  -2   27.62   16.75
 -11   1  -2   -2.02    9.08
  10   1   2   -5.28    8.46
  11  -1  -2  -32.22   11.13
  11 -10   2   14.67   13.26
 -11   1  -2    1.35   12.74
  11 -10   2   17.20   11.10
 -10  11  -2   -9.53   10.07
  10   1   2   15.35   15.13
  10   1   2    0.73   11.04
 -10  -1   2   14.63   10.05
  10 -11  -2   -4.07    5.62
 -11   1  -2  -17.51   13.16
  10 -11  -2   -4.62   10.30
  -1  11   2    8.77    8.38
 -11   1  -2    2.67    9.31
  10   1   2   -3.79    7.61
  10   1   2    5.96   10.61
 -10  -1   2  -11.96   11.43
   1  10  -2   -2.41    8.09
  11  -1  -2  -15.62   10.43
   1  10  -2   -2.46   11.89
  10 -11  -2   -1.17    9.24
 -10  -1   2  -12.45   11.35
 -10  -1   2    1.26   13.96
  -1 -10  -2  -10.79    7.93
  11 -10   2    0.42    7.62
  10 -11  -2   -0.09    6.33
 -11  10   2    1.51   10.36
   1 -11   2    9.84   12.16
  -1 -10  -2    1.47   11.75
 -11   0   2   86.06   18.82
 -11   0   2   46.62   11.65
  11   0   2   41.47   11.17
  11   0  -2   54.51   14.22
 -11   0  -2   92.31   13.82
  11 -11  -2   54.42   14.86
  11 -11  -2   56.24   12.84
 -11  11  -2   40.53   12.91
  11   0  -2   43.20   11.45
   0 -11  -2   -0.83   19.30
  11 -11  -2   57.47    9.68
  11   0  -2   45.29   18.28
  11   0   2   44.38   19.93
  11   0  -2   39.00   13.50
  11   0   2   45.68   13.28
  11 -11   2   40.56   18.43
   0 -11   2   56.85   12.66
 -11  11   2   60.88   13.42
   0 -11  -2   60.75   12.10
 -11   0   2   53.67   18.97
   0 -11  -2   44.11   13.15
  11   0   2    3.04   21.37
   0  11  -2   73.34   16.12
  11 -11   2   40.16    9.38
 -11   0  -2   66.34   16.56
   0  11   2   62.01   11.29
   0  11  -2   57.33   10.30
   0 -11   2   52.90   15.24
   0 -11  -2   39.91   14.43
  11 -11   2   51.55   14.81
   6   6   2  -13.26   10.87
   6 -12  -2   10.40    9.47
   6 -12  -2   17.38   10.90
 -12   6   2  -12.88    8.01
 -12   6   2   12.38    8.90
 -12   6  -2   -4.78   11.34
  12  -6   2    7.88   15.03
   6   6   2   19.48   10.92
   6 -12  -2   11.81   13.87
   6   6  -2    9.13   12.65
  12  -6   2    9.40   12.42
  -6  -6   2    8.07    9.02
  12  -6  -2   14.92   14.74
  12  -6  -2   -3.46   10.06
   6   6  -2   21.28    9.58
   6 -12   2   -4.91    9.60
   6 -12  -2   14.11    7.12
  12  -6  -2    1.90   10.52
   6 -12   2    0.00    6.11
   6 -12  -2    7.94   23.51
  -6  -6   2    0.61   11.21
  -6  -6  -2    5.16   10.47
  -6  -6   2   10.16   10.03
   6   6   2    6.30    8.94
   6 -12   2    2.22   15.41
  12  -6   2   -4.34   10.55
   6   6  -2   15.64   10.39
 -12   6  -2    2.44    8.13
  -6  -6  -2    4.21   10.31
  12  -6   2    8.42   14.10
   6   6  -2   -4.51    8.20
  -6  -6  -2   15.89   10.92
  12  -6   2    3.85    9.60
  -6  -6   2  -10.04   10.15
  -6  -6  -2    5.13   12.61
   6 -12  -2    6.49    5.00
 -12   6   2   26.87   17.31
  12  -6  -2    1.94   14.47
  -7  -5  -2   42.44   12.35
   5 -12  -2   17.61   15.06
   5 -12  -2   28.90   16.41
  -5  -7   2    4.66   10.43
  12  -5   2    3.89   11.01
  -5  -7   2   12.72   10.35
  12  -5   2   27.04   16.07
   5 -12  -2   16.27   13.04
  -5  -7   2   30.88   13.71
   5 -12  -2   21.14    9.40
 -12   7  -2   14.65    8.30
  12  -5   2   46.47   15.27
   5   7   2   14.45   10.71
   7 -12   2   22.31   17.21
  -7  -5  -2   27.68   10.72
   7   5  -2   44.72   11.60
  12  -5   2   25.47   11.11
   7 -12   2    2.14    9.49
  12  -7  -2   10.52   15.14
  12  -7  -2   32.27   13.57
  12  -5   2   -1.19   11.19
  12  -7  -2   21.57   11.49
  12  -7  -2   24.77   10.99
   5 -12  -2   21.72    6.17
   7   5  -2   21.68   10.29
 -12   5   2   25.69   17.74
  -7  -5  -2   32.37   12.24
   7 -12   2   31.77   17.03
 -12   7  -2   26.69   10.84
   7 -12   2   19.96    6.79
 -12   5   2   30.29    9.90
  -5  -7   2   20.81   10.28
   7   5  -2   32.06    9.89
   7   5  -2    2.86   13.82
   5 -12  -2   15.07   14.62
 -12   5   2   33.68   10.76
  12  -7   2   16.87   10.91
  12  -5  -2   30.49   13.91
   7 -12  -2   36.55   11.97
   7 -12  -2   27.47    5.71
  12  -7   2    3.58   14.88
 -12   5  -2   17.20    9.16
   5 -12   2   27.10    7.91
   7 -12  -2   24.97   10.63
  -5  -7  -2   23.97   11.38
  12  -5  -2   31.50   12.81
   7   5   2   18.89   18.39
 -12   5  -2   31.75   12.51
  -7  -5   2   26.07   12.61
  -5  -7  -2   20.18   11.64
   7 -12  -2   21.02    7.03
  12  -5  -2   33.51   13.15
   5 -12   2   13.73    9.27
  12  -7   2   38.17   17.11
   5   7  -2    7.28   12.39
   5   7  -2   27.81   10.66
  -5  -7  -2   43.93   12.16
  -7  -5   2   21.96   10.85
  -7  -5   2   33.35   10.30
   7 -12  -2   18.15   14.57
   5 -12   2   26.07   12.24
   7 -12  -2   31.66   10.17
 -12   5  -2   31.00   10.93
   7   5   2   14.88    9.03
  12  -7   2    5.88   10.03
 -12   7   2   13.43    9.14
 -12   7   2   32.78   10.20
  12  -5  -2   43.05   14.94
  12  -7   2   17.81   11.02
  12  -5  -2   20.29   15.34
   5 -12   2   12.14   16.44
   7   5   2   30.12   12.01
   7 -12  -2   32.58   16.97
  -8  -4  -2   12.21   11.12
  -4  -8   2   10.47   11.45
  12  -8  -2   -7.48    9.69
  12  -4   2   15.38   11.67
 -12   4   2   15.30   15.15
   8   4  -2  -21.63   13.69
  12  -4   2   32.68   13.60
  -4  -8   2    5.67    8.71
  12  -4   2   36.07   14.08
   8   4  -2   22.20   11.02
   8 -12   2   10.42    6.35
  12  -4   2   10.74   13.16
   4 -12  -2    9.65    6.26
   8 -12   2    3.17   10.38
  12  -8  -2    8.19   10.09
  -8  -4  -2   23.15   10.60
  -4  -8   2   43.49   15.38
   4   8   2    0.36    9.39
   4 -12  -2   -3.09   14.54
  -8  -4  -2   11.31   10.48
   8   4  -2    6.23    9.44
 -12   8  -2   34.24   12.19
  12  -4   2    7.31    9.19
  -4  -8   2   11.84   11.17
 -12   4   2   16.06    9.93
   8 -12   2   14.19   16.27
   4 -12  -2   -7.32   11.73
 -12   4   2   18.25    9.38
   8   4  -2    7.93   10.05
  12  -8  -2   27.85   15.32
  12  -8  -2   -2.30    9.22
   8 -12  -2    5.63   14.78
   4 -12   2   41.82   18.25
 -12   8   2    5.34    9.92
 -12   4  -2    5.27   11.15
  12  -4  -2    9.59    9.59
  -4  -8  -2   14.85   10.62
  12  -8   2   13.48   14.33
  12  -8   2   20.06    9.84
   4 -12   2   12.77    7.42
  -8  -4   2   16.51   12.62
  -8  -4   2   -7.53    9.19
  -4  -8  -2   12.65   11.88
  -8  -4   2   -2.54   10.32
   8 -12  -2   19.64   10.87
   8   4   2    9.96    8.39
   8   4   2   39.43   11.83
   8 -12  -2   13.14   10.49
   8 -12  -2   13.26    5.13
  -4  -8  -2   26.44   11.72
   8 -12  -2   22.30    9.79
  -4  -8  -2   33.83   13.30
  12  -4  -2    2.54   12.92
  12  -4  -2   25.97   13.79
  12  -4  -2   23.62   12.09
   4   8  -2   13.04   12.59
 -12   8   2   -2.12    8.01
   4 -12   2   -6.65   11.65
  12  -4  -2   19.85   13.11
 -12   4  -2    7.00    9.06
   4   8  -2    2.59   11.75
  12  -8   2   11.82   11.20
  12  -8   2   23.60   10.20
 -12   4  -2    7.98   23.40
 -12   4  -2   24.71   10.71
 -12   9  -2   -2.35   11.07
  12  -3   2   20.87   14.20
  12  -3   2    8.76   13.18
  -9  -3  -2   14.93   10.40
   9   3  -2   17.22    8.77
  12  -9  -2    2.11    9.60
   9   3  -2   22.78   10.80
  -9  -3  -2   29.51   11.18
  -3  -9   2   11.29   11.03
  12  -9  -2    7.50    9.37
   9   3  -2   -5.93   16.10
 -12   3   2   28.26   15.94
   9 -12   2   21.16    7.19
  12  -9  -2   15.08   14.33
   3   9   2    8.51   10.15
  12  -3   2    0.60   11.89
  -3  -9   2   42.01   15.47
   9 -12   2   -5.41   10.04
   9 -12   2  -11.20   14.97
   3 -12  -2   -6.05   14.24
   3 -12  -2    2.08   12.71
   3 -12  -2    9.88    7.34
  -3  -9   2   34.33   13.25
  -3  -9   2    6.88   11.01
  12  -9  -2   17.17    9.13
  -9  -3  -2   18.41   12.10
   9   3   2   30.86   12.07
 -12   3  -2   -2.94    9.00
  -3  -9  -2    0.48   10.95
   9   3   2   19.06    9.56
   9 -12  -2    0.63   15.32
   3 -12   2   13.38    7.78
  12  -3  -2   -9.99    9.49
  12  -9   2    6.61    9.11
  -9  -3   2   23.83   10.28
  -3  -9  -2   22.81   10.79
  12  -9   2   10.90   14.41
 -12   3  -2    0.28    9.61
  -9  -3   2   11.12   12.69
  12  -3  -2   29.79   24.80
   9 -12  -2   10.96    5.19
   3 -12   2    1.87   16.05
   3   9  -2   -1.86   13.21
  -9  -3   2   18.70   10.60
 -12   3  -2   24.08   13.36
  12  -9   2    2.10    8.13
  -3  -9  -2   31.14   14.16
  -3  -9  -2  -15.13   10.59
  12  -3  -2    7.00   12.08
   9 -12  -2   12.42    5.26
  12  -3  -2    9.78   14.15
   9 -12  -2   -1.56   11.91
   3 -12   2    8.78   12.99
 -12   2   2    7.51   14.54
  12 -10  -2   12.67    9.06
  -2 -10   2    3.44    9.65
  -2 -10   2    0.45   12.62
  12  -2   2    5.26   14.56
 -10  -2  -2   -5.18    9.28
 -10  -2  -2   -4.10   11.77
  -2  12  -2    5.17    7.76
  12 -10  -2   12.82    8.88
  -2 -10   2  -12.58   10.91
  10 -12   2    3.34   10.90
   2 -12  -2  -13.55   15.19
   2 -12  -2   -0.67    7.69
   2  10   2   11.37    9.91
  12 -10  -2    1.33    9.73
  12  -2   2  -12.65   11.18
  10   2  -2   12.69   11.56
  -2 -10   2    3.10   17.43
  10 -12   2   -9.04   16.34
 -10  -2  -2    3.47    9.62
  12 -10  -2    2.67   13.69
 -12  10  -2   21.07   12.40
  10 -12   2   -5.18    6.36
   2 -12  -2    6.61   12.77
 -12   2   2   23.79    9.83
  10   2   2   14.24    9.87
  12  -2  -2    3.82   14.66
  12  -2  -2   -2.43   13.71
 -12   2  -2   -2.22   22.05
 -10  -2   2   28.33   10.31
   2 -12   2    7.76    8.14
   2 -12   2   -3.05   13.62
   2 -12   2  -28.46   15.09
  -2 -10  -2    6.99   10.17
  12  -2  -2   11.85   11.53
  -2 -10  -2    6.35   12.69
  10 -12  -2    7.60    5.70
  -2 -10  -2   19.20   14.89
  -2 -10  -2    6.30   11.51
  10   2   2   17.75   12.16
 -12   2  -2    5.53    9.84
  12 -10   2    9.24   15.00
  10 -12  -2   18.76   16.60
  10 -12  -2    0.54   10.96
   2  10  -2   20.98   14.16
  12  -2  -2    2.61   11.86
  12 -10   2    8.53    8.80
 -12   2  -2   -0.97   11.42
 -12  10   2   -0.38   10.68
 -12  11  -2   19.45   12.71
  11 -12   2   34.55   19.29
 -11  -1  -2   27.77   14.46
  12 -11  -2   21.04   14.48
 -11  -1  -2   24.32   11.16
  11 -12   2   16.55   12.67
  -1 -11   2  -23.15   22.51
 -12   1   2   31.95   10.93
 -12   1   2   33.20   16.22
   1 -12  -2   16.20    8.93
  12 -11  -2   30.38    9.36
  -1 -11   2   34.49   14.75
   1 -12  -2  -46.66   27.64
  -1 -11   2   32.44   11.96
  11 -12   2   14.73    8.05
  12  -1   2   37.52   14.57
  -1  12  -2   19.62    8.81
   1 -12  -2   24.62   14.86
  11   1  -2   24.88   12.78
   1  11   2   31.04   10.27
 -11  -1   2   16.93   10.75
   1 -12   2   26.69   10.29
 -11  12  -2   34.36   12.96
 -12  11   2   26.75   12.15
  12  -1  -2   23.78   11.63
  12 -11   2   49.52   20.00
  11 -12  -2   29.92    7.61
   1 -12   2   13.45   15.27
  11   1   2   23.33   13.87
  12  -1  -2   19.12   14.13
   1 -12   2  -20.29   19.63
  -1  12   2   19.97    9.79
  -1 -11  -2  -30.47   20.24
 -12   1  -2   22.96   15.67
  11 -12  -2   32.56   13.09
 -11  -1   2   47.41   16.35
  12 -11   2   34.44   14.80
  -1 -11  -2   13.37   14.19
  12  -1  -2   -4.20   14.02
 -12   1  -2   19.83   10.81
  12 -11   2   28.59    9.88
  -1 -11  -2   23.58   10.48
  11 -12  -2   22.99   18.23
   0 -12   2    4.82    9.67
  12 -12  -2    3.13    7.77
 -12  12  -2   -1.30   11.38
 -12   0   2    4.68    9.79
   0 -12  -2    2.81   14.97
  12   0  -2   10.87   13.02
   0  12   2   -9.85    8.78
 -12   0   2   -0.03   14.52
  12 -12   2    0.46    7.76
   0 -12   2  -20.76   12.78
 -12   0  -2   19.40   14.88
  12 -12   2   20.02   13.32
  12 -12  -2   30.60   18.46
  12 -12  -2    0.72   11.79
  12   0   2    5.08   12.92
 -12   0  -2   -5.61   10.35
   0 -12  -2   -0.69    8.53
  12 -12   2    7.13   18.96
   7   6  -2   91.73   15.34
   6 -13  -2   74.35    8.28
  13  -7  -2   89.39   20.40
  13  -7  -2   66.12   13.81
   7 -13   2   64.93    9.26
  -7  -6  -2   86.27   15.80
 -13   7  -2   78.91   14.03
  13  -6   2   81.51   15.76
  13  -6   2   59.88   17.23
  13  -6   2   58.78   18.73
   6 -13  -2   80.18   16.06
   6   7   2   39.82   13.50
  -6  -7   2   87.28   15.22
  -6  -7   2  100.88   18.03
  -6  -7   2   83.36   15.35
 -13   6   2   70.63   12.94
   6 -13  -2   61.57   19.65
  -7  -6  -2   80.07   15.36
   7 -13   2   48.82   12.44
 -13   6   2   68.99   12.92
   7 -13   2   82.57   22.84
  13  -7  -2   66.87   14.61
  -7  -6  -2   75.99   14.86
  13  -7   2   69.29   14.29
  13  -6  -2   57.93   15.04
 -13   7   2   58.47   12.88
   7 -13  -2   58.86   12.54
   7   6   2   86.31   15.39
  -7  -6   2   89.33   14.59
 -13   6  -2   57.37   13.37
   7 -13  -2   71.27   20.24
   7 -13  -2   76.28    7.86
  -6  -7  -2   63.54   14.32
  -7  -6   2   94.35   17.69
  13  -6  -2   75.92   16.89
  13  -7   2   93.40   16.16
  -7  -6   2   42.16   15.15
  -6  -7  -2   67.23   14.39
  -6  -7  -2   80.09   15.42
   6   7  -2   64.98   14.30
 -13   7   2   82.35   13.97
  13  -7   2   63.38   19.59
   6 -13   2   74.22    9.87
   6 -13   2   51.89   20.38
  13  -6  -2   71.45   13.55
  13  -6  -2   50.19   17.65
  -5  -8   2  -15.62   10.99
  -5  -8   2   26.76   14.25
   8 -13   2    9.06   16.94
   8 -13   2   -4.01    5.97
 -13   5   2   16.47   10.00
   5 -13  -2   -3.38   16.01
   8 -13   2   -0.36    9.56
  -8  -5  -2   14.20   12.09
  13  -5   2  -22.73   13.13
  13  -8  -2    1.46   11.18
   5 -13  -2  -17.79   11.61
  13  -8  -2   -1.71   14.14
   5   8   2  -13.41   10.35
  -8  -5  -2  -11.46    9.74
  -5  -8   2   14.29   10.97
  13  -5   2   10.06   12.28
 -13   5   2    4.32   17.04
   8   5  -2    2.13   11.58
  13  -8  -2   16.28   11.32
   5 -13  -2    0.88    5.79
 -13   8  -2   12.75   10.83
  13  -5   2    1.21   11.92
  -8  -5   2    1.00   12.81
 -13   8   2   -5.69   10.05
 -13   5  -2   -0.96    9.63
  13  -8   2   -4.49    9.66
  -5  -8  -2    8.05   11.33
   5 -13   2   12.39   13.41
   8 -13  -2    7.92    5.00
  13  -8   2   -0.66   10.07
  13  -8   2   -7.84   14.52
   5 -13   2    4.73    7.15
   5   8  -2   -6.50   10.50
   8   5   2   -8.41   10.74
  -8  -5   2  -11.25    9.79
 -13   5  -2  -16.46    8.65
  -8  -5   2    9.35    9.82
  -5  -8  -2   12.19   11.23
  13  -5  -2   -7.15   11.75
  13  -5  -2  -18.96   13.00
   8 -13  -2   -5.89    9.30
  13  -5  -2   14.39   13.01
   5 -13   2   -4.29   16.07
  -5  -8  -2  -10.76   10.15
   8 -13  -2    2.82   16.05
   4 -13  -2   30.93   14.70
  13  -4   2   12.46   14.78
 -13   4   2    6.07   16.60
   9   4  -2    6.31   12.20
  -9  -4  -2   21.72   13.37
   4   9   2   18.34   11.79
  -9  -4  -2   34.12   12.04
  -9  -4  -2   17.64   11.57
  -4  -9   2   28.86   13.53
   9 -13   2   31.66   19.02
   9 -13   2   19.67    7.14
 -13   4   2   12.88   10.08
  13  -4   2    3.02   14.05
   9 -13   2    6.39   11.10
  13  -9  -2    3.85   10.47
   4 -13  -2   33.18   19.19
  13  -4   2   36.04   14.57
  13  -9  -2   35.06   12.44
  -4  -9   2   21.66   11.01
  13  -9  -2   25.39   16.56
   4 -13  -2   10.13    7.14
 -13   9  -2   13.31   12.06
 -13   9   2   29.90   12.87
  -9  -4   2   42.62   12.32
   4 -13   2    9.57   17.75
   9 -13  -2   24.12   17.25
   4 -13   2   35.85   15.51
  13  -9   2   37.84   18.43
   9 -13  -2   12.09   10.80
  13  -4  -2   19.00   14.93
   9 -13  -2   24.86    6.14
 -13   4  -2   15.04   16.95
   4 -13   2   17.56    7.85
  13  -4  -2  -18.43   12.46
  -4  -9  -2    8.45   12.12
  13  -4  -2   46.34   16.47
   4   9  -2   39.09   12.31
 -13   4  -2   15.87   11.12
   9   4   2   47.30   13.68
  -9  -4   2   22.34   11.01
  -4  -9  -2   31.56   12.35
  -9  -4   2   35.22   15.75
  13  -9   2   10.66   10.59
   3  10   2   24.64   11.66
  10 -13   2   23.20    7.29
  10   3  -2   -4.67   11.35
 -10  -3  -2   34.84   12.47
  13  -3   2   16.15   13.81
  13  -3   2   -0.82   12.62
  10 -13   2    5.77   11.39
  -3 -10   2   54.53   17.60
 -13  10  -2   16.78   13.30
   3 -13  -2    7.83   18.02
  13 -10  -2   26.05   16.28
 -13   3   2   24.70   10.94
   3 -13  -2   15.19   15.60
  13 -10  -2   -0.28    9.60
   3 -13  -2   18.54    7.95
  10 -13   2    8.66   17.70
  -3 -10   2   17.90   12.03
  -3 -10   2   11.12   13.33
 -13   3   2   24.07   16.81
   3 -13   2    6.48   18.97
  -3 -10  -2   11.49   12.92
  13  -3  -2    2.47   13.73
  13  -3  -2   20.62   15.98
  -3 -10  -2   26.01   11.75
  10 -13  -2   16.59   11.05
  13  -3  -2   17.58   14.53
 -10  -3   2    9.44   10.51
  13 -10   2   39.34   17.27
  10   3   2   20.75   13.57
   3 -13   2   -2.46    7.46
 -13   3  -2   27.75   17.20
   3  10  -2   15.95   10.27
  10 -13  -2   22.36   17.91
 -13  10   2   18.01   12.28
   3 -13   2   -8.37   13.47
  10 -13  -2   13.99    5.91
 -13   3  -2   23.27   11.62
  13 -10   2   20.51   10.33
 -10  -3   2   24.34   14.91
   2  11   2    7.05   10.21
  -2 -11   2   -1.05    9.56
   2 -13  -2    5.18    8.21
 -13   2   2    8.06    9.99
  13 -11  -2    5.57   14.69
  11 -13   2   16.06   18.65
  13  -2   2    8.46   14.14
  11   2  -2   -7.29   11.18
  -2 -11   2   14.91   18.13
 -13  11  -2   -2.69   11.94
 -11  -2  -2    1.18   10.54
  11 -13   2    4.98   11.81
 -13   2   2    5.29   16.14
   2 -13  -2  -11.88   14.03
   2 -13  -2  -37.47   18.30
  13 -11  -2   10.15    9.25
  -2 -11   2  -18.65   13.03
  11 -13   2    4.11    6.90
  13  -2   2  -12.50   11.17
  -2 -11  -2    8.32   10.42
   2 -13   2  -20.22   13.06
  11 -13  -2    4.56    5.69
  11 -13  -2   -7.02   10.55
  13 -11   2   -3.99    8.65
   2  11  -2    2.67    9.53
  13  -2  -2   -0.38   12.99
  13  -2  -2   24.52   19.89
 -11  -2   2   11.41   14.52
 -11  -2   2   10.96   10.63
   2 -13   2    1.19    8.27
  11 -13  -2   -9.44   15.55
 -13   2  -2    6.10   15.63
  11   2   2    6.47   13.76
  13 -11   2    3.82   14.72
  13  -2  -2    1.13   11.88
 -13  11   2   -4.78   10.82
  -2 -11  -2    9.28   13.47
 -13   2  -2    4.21   10.99
 -12  -1  -2   46.45   12.96
 -13   1   2   40.64   11.98
  12   1  -2   22.33   14.34
   1  12   2   29.24   11.69
  12 -13   2   10.75   20.47
   1 -13  -2   -8.86   15.19
  12 -13   2   28.58    9.04
   1 -13  -2   17.35   10.11
  13 -12  -2    9.69   14.24
  13  -1   2   14.16   14.73
 -13  12  -2   64.65   15.79
  13 -12  -2   26.36    9.95
 -13   1   2   44.83   18.08
  -1 -12   2   16.85   15.98
  12 -13   2    8.29   12.86
  -1 -12   2   22.00   10.97
  13  -1  -2   31.06   15.39
   1 -13   2    7.28   15.89
  12 -13  -2   15.33    7.61
  12 -13  -2   36.53   21.17
  13 -12   2   35.24   16.22
  -1 -12  -2   51.10   12.68
   1 -13   2   27.29   11.11
 -13  12   2   23.00   12.91
  13 -12   2   22.50   10.10
 -12  -1   2   27.34   11.63
  13 -12   2   48.86   21.83
  12 -13  -2   27.22   13.64
 -12  -1   2   25.23   15.83
  -1 -12  -2   25.76   17.28
  12   1   2   16.31   14.84
 -13   1  -2   24.56   16.23
 -13   1  -2   57.23   13.24
   0 -13  -2   55.79   19.50
 -13   0   2   62.43   13.24
  13 -13  -2   -0.73   22.68
  13 -13   2   42.70   23.26
  13   0  -2   44.15   16.35
   0 -13  -2   41.32   11.49
  13 -13  -2   47.52   10.41
  13 -13   2   40.16   10.71
   0 -13   2   52.36   12.68
   0 -13   2   59.78   19.22
  13 -13  -2   31.64   22.75
  13   0   2   29.18   16.88
 -13   0  -2   65.28   23.51
 -13   0   2   36.30   17.44
 -13  13  -2   49.46   19.08
  -7  -7   2   -6.02   11.43
  14  -7   2   -5.00   11.41
  -7  -7  -2   -3.44   11.36
 -14   7  -2   16.33   11.27
  -7  -7   2   30.01   13.92
  14  -7  -2  -14.33   11.08
  -7  -7   2    8.19   12.59
 -14   7   2    3.64   11.11
   7   7  -2    8.12   12.50
   7 -14   2  -10.46   16.71
  14  -7   2   -3.82   12.11
   7 -14   2    3.88    6.68
   7 -14  -2    7.49   12.36
   7   7   2   -6.37   11.52
  -7  -7  -2    0.99   11.50
  14  -7  -2  -12.93   15.23
  14  -7  -2   -4.62   12.18
  14  -7   2   -0.79   15.78
   7 -14  -2  -10.41   15.63
   7 -14  -2    7.08    5.34
  14  -6   2   13.27   14.05
  -8  -6  -2   29.77   13.28
 -14   8  -2   24.84   12.18
  14  -6   2   24.18   17.73
   6 -14  -2   24.27    6.69
  14  -8  -2   36.69   18.27
  -6  -8   2   42.41   13.57
   8   6  -2   37.95   13.78
   6   8   2   25.71   13.27
   6 -14  -2   23.71   19.27
   8 -14   2   46.27    8.68
   8 -14   2    2.50   17.94
  -6  -8   2   55.85   15.47
 -14   6   2   19.76   11.32
   6 -14  -2   -2.24   13.34
  14  -8  -2    9.50   12.69
  -6  -8   2   27.90   13.95
  14  -6   2   28.67   14.54
  -8  -6  -2   22.15   12.68
  14  -8  -2   61.85   14.22
   6 -14   2   14.55   19.27
   8 -14  -2   35.41   18.76
   8 -14  -2   28.40    5.88
  14  -6  -2   16.91   14.23
  -6  -8  -2   10.50   11.96
   8   6   2   35.41   14.25
  -8  -6   2   45.76   15.28
  14  -6  -2   14.22   17.25
 -14   6  -2   27.75   12.06
   6 -14   2   23.55    8.05
  -6  -8  -2   19.22   12.62
  14  -6  -2   35.57   15.00
  14  -8   2   29.96   13.63
   6   8  -2   41.10   13.44
  14  -8   2   12.24   16.22
   6 -14   2   -0.54   13.05
 -14   8   2   33.65   12.89
  -8  -6   2   31.90   12.97
  -8  -6   2   22.28   12.28
  -5  -9   2   86.35   19.40
   9 -14   2   59.51    9.38
  -9  -5  -2   74.74   14.79
   9   5  -2   57.59   15.06
  14  -9  -2   60.68   19.60
 -14   5   2   78.45   23.42
   9 -14   2   45.78   20.59
  14  -5   2   29.23   18.21
   5 -14  -2   68.48   17.59
   5 -14  -2   51.66   20.75
  14  -9  -2   48.74   13.76
  -9  -5  -2   69.74   15.52
 -14   5   2   70.43   13.62
   9 -14   2   99.16   24.02
   5 -14  -2   74.99    9.40
   5   9   2   82.45   16.12
  14  -5   2   78.16   17.84
  -5  -9   2   79.53   16.13
  -5  -9   2   80.20   15.98
  14  -5   2   91.30   17.61
 -14   9  -2   65.77   15.25
 -14   5  -2   81.01   15.01
   9 -14  -2   52.12   20.41
  -5  -9  -2   58.78   15.76
  14  -9   2   70.29   14.60
  14  -5  -2   50.12   19.03
   9 -14  -2   71.93    7.88
  -5  -9  -2   65.02   16.06
   9   5   2   60.39   16.59
  14  -9   2   63.19   20.26
  -9  -5   2   68.89   14.69
   9 -14  -2   60.90   13.59
   5 -14   2   83.41   18.46
   5 -14   2   39.23   21.81
   5 -14   2   68.01   10.46
 -14   9   2   56.63   14.49
  14  -5  -2   82.31   18.57
   5   9  -2   60.29   14.26
  -9  -5   2   76.10   17.81
  -9  -5   2   58.11   20.13
  14  -5  -2   36.65   16.00
  14 -10  -2  -31.24   13.38
  14  -4   2    9.85   14.96
   4 -14  -2   -0.18    6.78
  -4 -10   2   17.58   14.34
  14  -4   2  -12.79   13.46
 -14   4   2  -16.13   16.33
   4 -14  -2  -12.50   16.39
   4  10   2  -10.46   10.31
 -10  -4  -2    1.28   10.54
  10 -14   2  -15.38   10.07
  10 -14   2    8.64   18.45
  10 -14   2   -4.68    5.86
 -14  10  -2   16.87   13.18
  -4 -10   2    5.26   12.09
   4 -14  -2  -11.56   14.28
  10   4  -2  -27.95   11.74
  14 -10  -2   -6.01   10.16
 -14   4   2   -0.05    9.63
  14  -4   2    3.96   15.01
  14  -4  -2  -10.34   13.28
  14  -4  -2    4.49   15.58
  10 -14  -2   -3.95    4.70
 -10  -4   2  -25.83    9.12
  -4 -10  -2   -8.40   10.60
 -14   4  -2    0.32   10.60
  14 -10   2  -17.22   15.27
 -10  -4   2   -0.32   14.27
   4 -14   2   -1.01   19.08
   4  10  -2   15.98   11.47
   4 -14   2   -5.18    7.00
   4 -14   2    0.43   15.02
  -4 -10  -2  -12.84   12.05
  10   4   2   13.01   13.47
  10 -14  -2  -16.80   15.29
  14  -4  -2  -24.44   13.64
 -14  10   2   -6.55   11.99
  14 -10   2   -0.52   10.59
  10 -14  -2  -17.76    9.17
 -11  -3  -2   23.63   12.11
  14  -3   2   11.39   14.72
  11 -14   2  -23.52   30.97
  11   3  -2   46.66   17.17
 -14   3   2   30.30   12.03
  14 -11  -2   11.62   12.48
  -3 -11   2   20.57   12.21
  11 -14   2    4.23   12.33
 -14   3   2   19.72   18.06
   3  11   2   26.36   11.89
   3 -14  -2  -15.12   19.85
 -14  11  -2   27.46   14.15
  14  -3   2   15.42   15.38
  14 -11  -2    8.36   18.46
  14 -11   2  -30.31   16.07
  11 -14  -2   16.23    6.56
 -14   3  -2   11.83   17.53
   3 -14   2   10.14   10.44
  11 -14  -2   13.16   22.00
 -11  -3   2   15.57   11.16
 -14   3  -2   28.01   12.61
  14  -3  -2   13.61   14.87
  -3 -11  -2   25.85   17.22
 -14  11   2   26.23   13.31
   3  11  -2   -8.90   10.55
  11 -14  -2   12.39   12.08
  11   3   2   24.57   16.31
  -3 -11  -2   40.90   15.25
   3 -14   2  -26.02   20.17
  14  -3  -2    5.68   14.65
   2  12   2  -13.69   10.68
 -14  12  -2  -21.27   20.05
  12 -14   2   11.35    7.95
   2 -14  -2   21.57    9.38
  12 -14   2   -4.00   19.71
  14 -12  -2    0.26    9.65
 -14   2   2   20.89   17.67
  -2 -12   2    8.46   14.51
  12   2  -2    7.71   12.99
 -12  -2  -2   28.96   13.63
   2 -14  -2  -14.61   15.41
  -2 -12   2  -13.92    9.94
  14  -2   2  -16.59   19.98
  14 -12  -2    5.47   15.10
 -14   2   2    5.19   10.87
  12 -14   2  -18.43   10.90
  14  -2  -2   -2.89   14.44
  14 -12   2  -17.45   14.63
   2 -14   2    9.61    9.45
  12   2   2   -8.66   13.63
  14 -12   2   -9.59    9.38
  -2 -12  -2   17.74   11.39
  12 -14  -2    5.04   12.48
  12 -14  -2    1.13    6.09
  14 -12   2   10.28   19.69
 -12  -2   2    1.25   10.46
   2 -14   2  -38.98   14.19
  -2 -12  -2  -18.36   13.88
  12 -14  -2   13.48   19.96
 -14  12   2    6.16   12.18
 -15   8  -2   -3.72   11.88
  -8  -7  -2   -7.80   12.24
  -7  -8   2   11.95   12.41
  15  -8  -2   12.39   17.56
  -8  -7  -2   19.68   13.36
   7   8   2  -15.13   13.51
 -15   7   2   18.26   11.89
   8   7  -2   -3.42   14.03
   7 -15  -2   -2.42   17.76
  15  -7   2   -4.91   13.71
  15  -8  -2  -31.85   19.69
   8 -15   2    5.03    6.88
   7 -15  -2   -8.47   24.47
  15  -7   2    1.36   20.10
  -7  -8   2   20.30   15.42
  -7  -8  -2   20.55   14.23
  15  -7  -2   -6.78   11.83
   7 -15   2  -26.40   19.29
  15  -7  -2   -3.73   13.45
  -8  -7   2   21.88   21.67
  -7  -8  -2    2.23   12.78
  15  -8   2   -0.42   17.41
  -8  -7   2  -11.36   10.70
 -15   8   2    6.82   11.08
  15  -7  -2  -16.29   19.08
   8   7   2  -12.43   12.75
   7 -15   2    8.34   13.70
  15  -8   2   -9.56   11.79
 -15   7  -2   -3.01   11.16
   7 -15   2   -1.04    6.80
   8 -15  -2  -18.53   15.24
  -9  -6  -2   -7.87   11.13
   9 -15   2   13.88    7.40
  15  -9  -2   17.78   12.73
 -15   9  -2    5.21   12.64
   6 -15  -2  -13.70   13.34
   6 -15  -2    0.51    6.24
   6   9   2    0.41   15.34
 -15   6   2  -20.80    9.66
  15  -6   2   -8.07   13.23
  -6  -9   2   -0.96   13.13
   9 -15   2   -8.06   18.13
  -6  -9   2   27.49   13.58
   9   6  -2    4.26   13.10
  15  -9  -2   -3.80   16.18
   6 -15  -2  -36.74   16.00
   9   6   2   -0.94   13.70
   6 -15   2  -18.17   19.91
  -6  -9  -2   15.68   14.70
 -15   9   2   -3.65   11.79
   6 -15   2   20.94   14.50
  -6  -9  -2   27.66   14.26
  15  -9   2  -11.37   17.56
  15  -6  -2  -18.50   13.00
 -15   6  -2   -0.46   11.14
   6   9  -2  -12.52   13.09
  15  -6  -2   -0.24   14.95
  -9  -6   2    6.70   17.93
  15  -9   2  -19.27   17.75
   6 -15   2    2.69    6.84
   0   0  -3    6.79    2.19
   0   0  -3   -0.18    1.88
   0   0  -3    0.38    1.35
   1   0  -3  127.87    6.66
   0  -1   3  138.07    6.61
   1  -1   3  130.95    8.81
   0  -1  -3  128.36    5.97
  -1   0  -3  134.36    6.79
   1  -1  -3  126.88    5.55
   1  -1   3  126.76    7.67
  -1   1   3  132.37    8.20
  -1   0  -3  119.34    6.73
  -1   0   3  131.39    7.13
  -1   0   3  123.00    7.11
   0   1  -3  124.61    6.59
   0   1   3  129.27    5.85
   0   1  -3  120.72    6.00
  -1   0   3  128.83    6.91
   1   0  -3  128.48    9.01
   0   1  -3  124.42    8.79
   1  -1   3  127.93    5.41
   0   1  -3  123.93    8.58
   1  -1  -3  126.92    7.59
   0  -1  -3  124.95    5.75
  -1   1  -3  123.32    6.91
  -1   1   3  124.36    5.38
  -1   0  -3  125.21    7.57
  -1   1   3  126.38    7.99
   0   1   3  118.11    5.59
   1  -1   3  139.46    6.92
   1   0   3  136.24    6.88
   1   0  -3  123.41    8.84
   1  -1  -3  125.83    5.69
   1   0  -3  128.50    5.08
   1  -1  -3  137.38    8.56
  -1   1  -3  123.49    8.11
   1  -1  -3  130.11    7.79
  -1   0   3  125.42    8.31
   1   0  -3  123.09    6.94
   0  -1   3  126.18    6.06
   1   0   3  138.94    6.69
  -1   1  -3  145.11    7.27
  -1   0  -3  122.95    7.10
   0   1   3  127.85    7.81
   0  -1  -3  125.87    6.19
   0  -1   3  132.97    9.24
  -1   1  -3  125.83    5.22
  -1   1  -3  126.89    7.29
  -1   0   3  128.90    5.18
   0  -1  -3  134.01    6.94
   0   1  -3  111.78    6.65
  -1   2  -3    5.53    3.73
  -2   1   3   -1.25    4.39
  -2   1   3   -4.42    6.39
   1  -2   3    3.83    6.86
   1   1  -3   -2.68    2.97
  -2   1  -3   -4.74    4.12
   2  -1   3    0.47    3.39
  -1  -1  -3    0.29    3.41
   2  -1   3    1.66    4.41
   1   1   3    1.65    3.19
  -1   2  -3   -0.16    1.59
  -1   2   3   -2.28    4.08
   2  -1  -3    0.10    2.81
   1  -2  -3    2.04    4.09
  -1   2  -3    2.95    5.23
   1  -2  -3    4.21    5.53
  -1  -1  -3   -4.75    4.07
  -1  -1  -3   -2.95    2.48
  -1  -1  -3    0.96    3.39
   2  -1   3   10.76    5.49
  -1  -1  -3    1.98    4.07
   1   1  -3   -3.26    2.99
   1   1   3    2.18    3.78
  -1  -1   3    3.36    3.70
  -1  -1   3    3.96    3.57
  -2   1   3   -0.04    4.12
   1   1  -3   -0.14    3.77
  -1   2  -3    0.02    5.23
   1   1  -3    3.06    5.82
  -2   1   3    3.16    2.66
   1   1   3    1.81    3.48
  -1   2  -3    4.49    3.63
   2  -1  -3   -5.08    4.66
  -1  -1  -3   -4.67    4.18
  -2   1  -3    0.05    3.05
   2  -1  -3    0.16    2.60
  -2   1  -3    4.18    4.38
   1  -2   3   -0.82    3.24
   1   1   3    6.85    4.63
   1   1  -3   -6.93    3.43
  -2   1  -3   -5.61    4.45
   2  -1   3   -4.41    6.16
   1  -2   3    1.22    1.63
   1  -2  -3    0.77    4.68
   1  -2   3   13.26    5.53
   2  -1   3   -5.02    2.87
  -1  -1   3    3.01    5.92
   1  -2   3    2.86    3.54
  -1  -1   3   11.92    7.54
  -1  -1   3   -1.26    2.90
   2  -1  -3   -0.66    5.31
   0   2   3   50.43    6.11
  -2   0   3   63.32    6.30
   2   0  -3   50.98    4.31
   0  -2  -3   60.35    5.42
   0  -2  -3   61.80    5.24
   2   0  -3   55.42    8.83
  -2   2   3   48.24    5.47
   0  -2  -3   49.81    4.60
  -2   2  -3   50.77    6.13
   0  -2  -3   60.63    6.30
  -2   0   3   57.14    7.66
   2  -2  -3   58.70    5.66
   2   0  -3   40.04    4.73
   0  -2   3   62.92    7.09
  -2   0   3   51.17    8.10
   0  -2   3   47.22    4.98
   2  -2  -3   59.21    4.43
  -2   2   3   44.42    6.35
   2   0  -3   50.87    7.93
   0   2  -3   55.53    5.20
  -2   2  -3   48.49    5.99
   2   0   3   43.90    5.55
   0  -2  -3   61.05    5.83
   2  -2   3   64.38    6.47
   0  -2   3   68.54    8.66
   2  -2  -3   63.61    8.24
   2  -2  -3   58.26    4.59
  -2   0  -3   59.73    7.21
  -2   0  -3   51.06    5.29
  -2   0  -3   69.63    6.26
  -2   2  -3   55.63    5.83
  -2   0  -3   56.72    7.52
   0   2  -3   45.16    4.67
  -2   2  -3   62.52    3.79
   0   2  -3   57.81    4.46
   0  -2   3   53.99    5.25
   0  -2  -3   60.70    6.98
   2  -2   3   59.91    3.82
   0   2   3   50.80    4.58
   2   0   3   52.44    6.37
   0   2  -3   53.28    7.77
   0   2   3   54.48    4.41
   2   0   3   70.00    6.19
   2  -2  -3   70.30    6.78
   2   0   3   42.71    5.34
   2  -2   3   51.89    6.24
   2   0  -3   67.82    6.18
  -2   0   3   54.28    4.57
  -2   2   3   54.68    8.35
   2   0   3   67.12    5.71
  -2   0   3   58.91    5.40
   2   0   3   46.51    7.49
   0   2   3   56.16    5.24
  -2   0  -3   43.73    5.36
   0  -2   3   52.95    4.27
  -3   1   3 1033.89   34.96
  -1   3  -3 1010.04   33.71
  -2  -1  -3 1031.41   37.22
   2   1  -3  982.77   38.20
   1   2   3 1017.67   33.51
  -1   3  -3 1040.55   34.10
   3  -1   3 1028.30   35.19
   3  -1   3  994.64   34.25
   3  -2  -3 1026.65   33.59
   3  -1   3 1056.23   37.44
  -1  -2   3 1021.81   34.42
   3  -1   3  988.28   36.26
   2  -3   3 1022.05   35.51
   2  -3   3  987.62   36.14
  -1  -2   3 1054.52   37.10
   2   1  -3  994.85   34.72
   1  -3  -3 1026.11   34.89
  -3   1   3 1024.53   33.53
   1   2   3  988.25   33.59
   2   1  -3 1007.09   33.66
   1   2   3 1047.37   35.07
   3  -2  -3  967.09   37.21
   3  -1   3 1018.02   34.76
  -2  -1  -3 1065.97   35.17
  -2  -1  -3  996.01   34.71
   2   1  -3 1040.98   34.79
   2  -3   3  984.77   34.39
  -1   3  -3  993.44   32.56
   2  -3   3 1043.84   39.26
   2   1  -3 1030.88   34.01
  -2  -1  -3  999.29   34.76
   1  -3  -3 1031.70   34.59
  -2  -1  -3 1029.98   34.24
  -1  -2   3 1029.65   38.55
  -1   3  -3 1017.21   37.89
   1   2   3 1046.62   34.70
  -3   1   3  973.23   36.75
  -1  -2   3 1028.79   34.83
   1  -3  -3 1023.82   34.78
  -3   2  -3 1031.89   35.91
  -1  -2   3 1008.29   32.54
   2   1  -3 1019.07   38.98
   1  -3  -3 1000.10   37.40
  -3   2  -3 1000.45   33.15
   3  -2  -3 1030.83   33.75
  -1  -2   3  987.54   34.32
   3  -2  -3 1025.71   35.33
  -3   2  -3  992.97   36.10
   1   2   3  997.54   33.99
   1   2   3 1061.06   35.02
  -1   3  -3 1035.80   35.13
   3  -2  -3 1010.07   35.25
   3  -1   3  994.53   35.85
  -2  -1  -3 1046.34   34.23
   3  -2   3  997.90   34.82
  -1  -2  -3 1017.10   35.92
   1   2  -3 1035.34   37.61
  -2  -1   3 1015.07   33.94
   2   1   3 1017.56   36.79
   2  -3  -3 1018.57   36.24
   3  -1  -3  964.93   34.33
  -3   2   3  986.63   37.82
  -1  -2  -3 1032.76   35.07
   2  -3  -3  955.26   38.55
  -2   3  -3 1049.37   34.01
   3  -1  -3 1005.59   33.52
  -1  -2  -3 1049.95   34.81
   3  -1  -3 1041.65   37.82
   3  -1  -3  996.60   35.14
  -3   1  -3 1008.76   36.84
  -2  -1   3 1036.71   34.90
  -3   2   3  996.57   33.33
  -2   3  -3 1027.65   36.50
  -3   1  -3 1021.38   34.10
  -3   1  -3 1040.47   34.88
   1   2  -3 1041.60   34.58
   3  -2   3  989.20   36.42
   3  -2   3  975.36   36.11
   2  -3  -3 1008.24   34.81
  -3   2   3 1016.36   34.91
   1  -3   3 1017.39   34.20
   2   1   3  987.89   34.43
   1   2  -3 1031.09   34.26
   1  -3   3  986.12   35.76
   2   1   3 1037.03   34.16
  -3   2   3 1054.69   35.10
  -3   2   3  971.81   33.65
  -1  -2  -3 1031.23   33.52
   3  -2   3 1034.61   39.21
  -1  -2  -3  989.47   34.02
   1   2  -3  965.48   37.41
   2   1   3 1007.91   34.69
  -2  -1   3 1087.68   35.07
   1  -3   3  999.46   35.00
   1  -3   3 1006.60   33.92
   1   2  -3 1027.71   32.44
  -1  -2  -3  993.34   34.34
  -2  -1   3 1008.06   37.71
   2   1   3 1047.92   34.59
  -2   3  -3 1035.92   35.23
  -1   3   3  997.57   34.79
   3  -2   3 1003.15   33.33
  -2  -1   3 1052.87   37.82
   3  -1  -3 1053.41   37.08
  -3   1  -3 1000.22   35.87
  -3   1  -3 1021.69   37.29
   3   0  -3 4357.91  140.49
   3  -3   3 4425.27  142.09
   3  -3   3 4488.95  138.29
  -3   3   3 4548.55  144.25
  -3   3   3 4371.63  140.44
   3  -3  -3 4378.99  140.15
   3   0  -3 4489.64  143.29
   3   0   3 4341.02  140.69
   0   3   3 4625.68  138.44
   0   3  -3 4529.91  139.37
   3   0  -3 4536.72  143.27
   0  -3   3 4554.81  141.40
   3  -3  -3 4487.36  138.71
  -3   3  -3 4380.79  141.73
   0   3   3 4473.58  138.69
   3   0  -3 4439.64  140.71
   3   0   3 4528.02  141.02
   0  -3   3 4451.48  138.35
   0  -3  -3 4486.65  140.09
   0  -3   3 4513.20  143.40
   0   3   3 4488.52  139.26
   0   3  -3 4526.61  143.23
   3   0  -3 4490.11  139.56
   0  -3  -3 4498.15  140.64
   0  -3  -3 4510.40  139.06
   0  -3  -3 4524.09  140.49
   0   3   3 4335.48  140.29
  -3   0  -3 4409.73  141.02
  -3   0  -3 4532.57  140.44
  -3   3  -3 4465.92  138.25
   0   3  -3 4375.80  138.41
   0   3   3 4460.70  141.23
   3  -3   3 4383.72  140.72
   3   0  -3 4511.17  143.11
   0  -3  -3 4509.90  140.97
   3  -3  -3 4543.90  139.27
   0  -3   3 4502.24  140.18
   3   0   3 4458.60  140.44
   3  -3   3 4493.17  141.16
  -3   0   3 4493.98  140.53
   0   3  -3 4381.25  139.75
  -3   0  -3 4424.85  140.84
  -3   0  -3 4197.78  142.63
  -3   3  -3 4483.89  140.48
   0  -3   3 4483.60  139.47
   3   0   3 4496.74  140.43
  -3   0   3 4545.95  139.57
  -3   0   3 4363.45  143.17
   3  -3  -3 4416.94  144.13
   0  -3  -3 4462.13  139.23
  -3   0  -3 4585.18  140.46
   0   3   3 4568.17  140.41
  -3   0   3 4466.17  140.65
   3  -3  -3 4458.23  140.90
   3   0   3 4603.42  140.85
   3   0   3 4179.33  142.68
  -2  -2  -3   -6.37    5.33
   2   2   3    6.48    3.78
   4  -2   3   -3.43    8.12
  -4   2  -3   -7.94    6.44
   2  -4  -3   -1.22    5.20
   2   2  -3   -1.50    8.64
   4  -2   3   -1.61    8.36
  -4   2  -3   -4.76    6.06
  -4   2   3   -3.46    4.25
   4  -2  -3    6.60    5.90
  -2   4  -3    1.61    8.38
   4  -2   3    5.50    7.24
   2   2  -3    0.37    4.76
   2   2   3    7.73    5.36
   4  -2   3    3.98    6.77
  -4   2   3   -4.56    7.93
  -4   2  -3    2.66    3.82
  -4   2   3   -0.02    3.39
   4  -2  -3    1.88    6.88
  -2  -2  -3   -7.48    4.32
  -2   4  -3   -0.83    2.68
  -2  -2   3   -0.70    4.83
  -2  -2  -3    2.96    6.43
   2  -4  -3    6.67    5.79
   2  -4   3   -1.14    3.09
  -2  -2   3   -4.75    4.69
  -2   4  -3    3.16    7.03
  -2  -2   3    5.06    4.81
   2  -4   3    1.57    6.27
   2   2  -3   20.25    8.99
  -2  -2  -3   -2.62    5.49
  -2  -2  -3    2.82    5.31
  -4   2   3    6.09    5.25
   4  -2   3    0.49    4.80
  -2  -2   3   -7.40    8.74
   4  -2   3   -3.52    4.37
  -2  -2  -3    5.34    3.64
   2  -4   3   -5.46    4.72
  -2   4  -3   -4.86    3.57
   2  -4   3    2.48    4.15
   4  -2  -3    0.99    4.60
   4  -2  -3    1.54    3.97
   2   2   3    6.48    5.56
   2   2   3   -5.81    4.57
   2   2   3    2.24    3.88
   2   2  -3  -17.06    4.91
  -2   4  -3    1.99    4.84
  -2   4  -3    8.39    4.98
  -4   2  -3    7.31    5.63
   2   2  -3   -4.26    4.74
   2   2  -3   -1.74    4.33
   2   2  -3   -2.49    4.89
   4  -2  -3    3.29    9.63
   2  -4   3   -5.55    8.40
  -2  -2   3    8.50    7.06
  -4   2   3    8.32    6.68
   4  -2  -3    1.48    7.79
   2  -4  -3    6.96    6.17
   3   1  -3   12.79    5.65
   1  -4  -3    1.25    4.28
   1  -4  -3    1.87    3.60
  -4   3  -3    6.08    6.27
   4  -3  -3   -7.82    3.76
  -4   1   3    6.69    4.87
   1   3   3    4.00    3.69
  -4   1   3   -4.89    7.45
  -1   4  -3   10.27    4.12
  -1   4  -3    3.20    3.54
   3  -4   3   -0.58    4.35
  -3  -1  -3   21.84    8.50
   3  -4   3    1.20    7.18
  -3  -1  -3    8.76    4.66
   4  -1   3    2.05    8.78
  -1   4  -3   11.22    7.95
   4  -3  -3    5.40    5.92
   4  -1   3    2.11    4.72
   3  -4   3    5.46    2.60
  -1  -3   3    1.76    4.73
  -4   1   3    0.45    5.01
  -3  -1  -3    8.59    5.64
  -3  -1  -3    3.41    5.24
  -1  -3   3   12.20    5.03
   3   1  -3    4.59    9.17
  -1   4  -3    4.69    6.47
   4  -3  -3    4.12    4.55
   1  -4  -3   -0.94    2.64
  -1  -3   3   14.98    8.41
  -1   4  -3    1.05    4.21
  -3  -1  -3    1.93    5.05
   4  -3  -3    9.57    8.31
   1   3   3   -5.68    4.74
   4  -1   3    5.61    5.75
   1  -4  -3    7.85    5.66
   4  -1   3    9.22    5.49
   3  -4   3    3.27    2.68
  -3  -1  -3   14.40    5.79
   4  -3  -3    6.55    9.32
   3   1  -3    5.75    4.79
  -1  -3   3   -1.61    5.94
   3   1  -3   12.70    4.69
  -4   1   3   15.56    8.32
  -4   3  -3    7.81    6.11
   4  -1   3    5.33    5.23
   3  -4   3   14.45    9.76
   4  -1   3    0.59    6.71
  -4   3  -3   -3.08    5.23
   1   3   3    1.84    5.25
  -3   4   3   14.28    6.73
   1  -4  -3   10.86    6.88
   1   3   3    6.87    5.13
   1  -4  -3    2.42    5.23
   4  -3  -3    6.50    5.70
  -1  -3   3    3.47    5.22
   3   1  -3    0.47    6.58
   3  -4   3   -1.71    6.53
  -4   3  -3    2.14    3.33
  -4   1   3    4.66    4.31
   1   3   3    5.24    3.24
   1   3   3    7.52    4.94
   3   1  -3   12.23    9.91
   4  -3   3   -0.99    5.47
   4  -3   3    9.86    3.92
   4  -1  -3    1.87    5.82
  -4   3   3   14.29    9.24
  -3   4  -3    0.20    4.26
  -1  -3  -3    7.85    5.44
   3  -4  -3    2.52    5.48
   1   3  -3    7.40    8.37
  -4   1  -3    6.89    5.97
  -3   4  -3    5.02    7.03
   1   3  -3    4.07    7.40
   4  -1  -3    0.71    6.63
  -3  -1   3   -9.61    7.94
   4  -1  -3    4.12    7.86
  -3   4  -3    7.05    6.17
   4  -1  -3   10.65    7.39
   3   1   3   10.95    8.00
  -1  -3  -3    4.00    6.19
  -1  -3  -3    3.74    3.48
  -3  -1   3    2.12    5.08
   3   1   3    6.64    4.89
  -3  -1   3    0.14    4.67
   4  -1  -3    6.08    8.67
  -1  -3  -3   12.16    4.39
   3   1   3    9.35    4.73
  -4   3   3   15.73    5.51
  -4   1  -3    1.62    5.51
   1   3  -3    4.54    4.85
  -4   1  -3   11.91    7.56
   4  -1  -3   -0.58    4.14
  -3  -1   3    6.12    7.79
  -4   1  -3    7.96    6.89
  -4   3   3   -0.23    4.86
  -3  -1   3   -5.32    4.19
   3   1   3    7.17    6.41
   4  -3   3    0.71    8.76
   1  -4   3    3.31    3.47
  -1   4   3    2.72    5.14
   4  -3   3    8.06    5.17
  -4   1  -3    8.23    5.17
   1   3  -3    2.65    3.99
   3   1   3   -1.36    5.46
   1  -4   3    3.58    4.10
   3  -4  -3   10.07    6.28
  -4   3   3    8.46    5.06
  -1  -3  -3    4.05    5.29
   4  -3   3   -7.81    6.40
  -1  -3  -3    4.48    5.75
   3  -4  -3    6.54    9.06
   1  -4   3   -0.02    5.18
   1  -4   3    3.86    3.79
   3   1   3    6.56    5.34
   1  -4   3    7.56    7.34
   1  -4   3    0.47    5.71
   4   0   3  278.93   14.12
   4  -4   3  270.96   15.60
   4  -4  -3  270.24   11.77
   4  -4  -3  252.72   14.28
  -4   4  -3  302.16   17.14
  -4   0  -3  256.92   13.83
  -4   0  -3  259.19   14.04
   0   4  -3  243.32   16.77
   4   0  -3  268.51   14.06
   0   4   3  269.26   10.44
   0   4  -3  271.28   12.51
   0  -4   3  279.44   14.87
   0  -4   3  258.94    9.96
   4  -4  -3  228.00   13.87
   0  -4  -3  273.33   14.34
  -4   0  -3  255.04   14.47
  -4   0   3  255.25   19.23
  -4   4  -3  278.01   15.78
  -4   0   3  246.63   14.08
   0   4   3  276.81   14.40
   4   0   3  264.90   14.40
   4   0   3  294.48   14.60
  -4   4   3  282.05   14.76
   4  -4  -3  297.52   20.63
   4  -4   3  264.36   10.99
   0   4  -3  271.68   11.12
  -4   0  -3  249.63   14.98
  -4   4   3  263.63   19.50
  -4   0   3  264.43   13.09
   0  -4  -3  256.91   15.23
   0  -4  -3  254.17   13.75
   4   0   3  278.33   14.01
   0   4   3  266.80   11.93
   0  -4   3  243.54   17.31
   4   0  -3  270.61   14.49
  -4   0  -3  251.61   14.91
  -4   0  -3  302.96   18.26
  -4   0   3  270.41   17.48
   4   0   3  271.61   18.59
  -4   4  -3  248.58   13.50
   4   0  -3  241.08   18.77
   4   0  -3  299.54   19.73
   0  -4  -3  253.60   11.54
   0  -4  -3  272.67   14.35
  -4   4  -3  283.26   10.86
   4  -4   3  262.49   14.58
   0   4   3  232.89   15.19
   0   4   3  264.73   11.14
   4   0  -3  290.02   12.95
   4  -4  -3  259.16   19.92
   0   4  -3  263.69   12.52
   0  -4  -3  262.11   12.06
   4  -4  -3  277.05   12.80
   4   0  -3  257.59   17.86
   0  -4   3  278.72   13.56
  -4   0   3  279.71   14.25
   4   0   3  275.07   15.09
   0  -4   3  259.03   12.62
   0  -4   3  252.35   14.77
   4  -4   3  256.71   17.40
   0   4  -3  228.42   15.95
  -5   2   3   17.54    4.88
   5  -3  -3   14.69    4.72
  -3  -2  -3    5.50    5.09
   3  -5   3   12.14    3.22
   3  -5   3   17.83    3.42
  -5   2   3   26.34    8.29
  -2   5  -3    5.14    7.98
  -2   5  -3   20.08    3.61
   3  -5   3   25.85   10.18
   2  -5  -3   11.64    5.75
   3  -5   3   14.58    6.64
  -5   3  -3    9.71    6.38
  -2  -3   3   18.67    7.65
   2   3   3   21.14    5.76
  -5   2   3   17.60    5.68
  -5   2   3   15.53    8.62
   3  -5   3    9.44    5.41
   2   3   3   17.80    6.04
   5  -3  -3   20.76    7.22
   5  -2   3   17.12    6.06
   2   3   3   27.30    6.51
   3   2  -3   22.80    5.97
  -2   5  -3   22.86    6.43
  -2   5  -3   21.22    5.63
  -2  -3   3   30.35   11.31
  -2   5  -3   13.50    4.00
   3   2  -3   12.39    8.73
   5  -2   3   23.51    5.89
   5  -2   3   15.06    5.80
  -3  -2  -3   21.45    8.01
   5  -3  -3   32.96   11.67
   3  -5   3   11.06    7.32
  -2  -3   3   14.91    5.72
   5  -2   3   15.26    8.63
   5  -3  -3   12.10    4.82
   2   3   3   22.55    4.13
   3   2  -3   37.10   11.01
   5  -3  -3    9.83    5.96
   3   2  -3   26.08    6.78
  -3  -2  -3   18.67    5.88
   5  -3  -3   19.11    9.57
   5  -2   3   20.52    7.42
   3   2  -3   14.39    4.86
   2  -5  -3   22.56    9.19
  -3  -2  -3   20.93    4.78
  -5   3  -3   15.45    7.77
  -2  -3   3   22.31    6.35
  -5   3  -3    4.58    5.73
   5  -2   3   19.89    8.71
   2   3   3   17.28    6.18
  -5   3  -3   27.93    4.79
   2   3   3   24.85    5.22
   3   2  -3   27.05    4.29
  -2  -3   3   14.80    5.69
  -3  -2  -3   14.63    5.45
  -3  -2  -3   21.02    6.50
   3   2  -3   15.52    4.97
   2  -5  -3   15.29    5.97
  -5   2  -3   14.59    7.59
   2  -5   3    9.79    7.06
   2  -5   3   22.91    4.93
  -2  -3  -3   15.81    5.27
   5  -3   3   15.62    4.91
  -5   3   3   22.28    9.27
  -3   5  -3   21.87    4.22
  -2  -3  -3   14.47    6.14
   5  -2  -3   27.73    7.13
   3   2   3   25.17    8.36
   2   3  -3   21.60    8.17
   2   3  -3    6.94    5.26
  -3  -2   3   17.09    8.43
  -5   2  -3   17.49    4.96
  -3  -2   3   42.97    9.12
  -2  -3  -3   16.28    8.06
   5  -2  -3   17.05    9.24
   5  -3   3   22.97    8.39
   5  -3   3   25.84    8.73
  -5   3   3   11.65    5.48
  -5   3   3   22.88    5.68
   3   2   3   15.39    5.69
   2   3  -3   15.25    5.91
   5  -3   3   11.87    5.66
   3  -5  -3   10.02    6.22
   5  -2  -3   20.60    6.04
   3   2   3   17.63    6.07
   3   2   3   42.63    8.39
   2   3  -3   16.93    8.77
  -3   5  -3   30.16    5.48
   3  -5  -3   23.50    8.68
   3  -5  -3   12.80    5.72
  -2  -3  -3    9.39    3.65
  -2  -3  -3   27.03    7.48
   3   2   3   14.92    4.58
  -5   2  -3   21.11    7.93
  -5   2  -3   17.98    9.11
  -3  -2   3   19.46    5.83
  -3  -2   3   15.10    5.62
   5  -3   3   14.34    9.60
   5  -2  -3   -1.80    7.54
  -5   3   3   13.85    6.60
  -3   5  -3   15.81    6.95
  -3   5  -3   24.66    7.63
   2  -5   3   15.83    9.30
  -3  -2   3   -0.54    8.45
   2   3  -3   19.04    5.12
   5  -3   3   22.58    6.81
   2  -5   3   15.36    3.80
   3  -5  -3   19.21    9.93
  -5   2  -3   13.39    6.05
   5  -2  -3   12.20   10.05
   3   2   3   22.20    5.63
   2  -5   3   20.54    5.56
   5  -2  -3   27.23    5.25
  -2  -3  -3   24.59    6.52
  -1   5  -3  595.47   22.99
   4   1  -3  586.18   24.09
   4   1  -3  534.61   28.96
   5  -1   3  556.51   27.67
   5  -1   3  588.55   24.32
   1  -5  -3  592.79   23.72
   5  -4  -3  598.64   23.74
  -5   1   3  574.98   23.63
   5  -1   3  541.19   25.37
   5  -1   3  575.07   23.62
   4   1  -3  576.48   28.33
  -1   5  -3  594.56   21.36
   1   4   3  585.14   24.20
   4  -5   3  576.61   20.09
  -5   1   3  575.59   23.37
   4   1  -3  579.31   23.64
  -4  -1  -3  614.72   24.13
  -5   4  -3  516.19   23.64
   1   4   3  580.85   21.31
   4  -5   3  607.02   25.68
   4   1  -3  571.49   22.79
   1   4   3  597.87   20.43
  -1   5  -3  552.21   27.19
  -5   1   3  595.34   22.58
   4  -5   3  573.48   26.89
   1  -5  -3  580.30   22.03
   1   4   3  566.13   23.62
  -4  -1  -3  528.61   27.51
  -1  -4   3  568.43   23.41
  -4  -1  -3  561.02   23.50
  -5   4  -3  573.72   27.13
   1   4   3  579.32   23.50
   5  -4  -3  546.49   29.15
   5  -4  -3  572.67   24.01
  -4   5   3  638.29   25.27
  -4  -1  -3  594.16   24.58
   5  -4  -3  553.03   22.07
  -1  -4   3  587.95   23.89
  -4  -1  -3  612.46   24.10
  -5   1   3  575.96   27.34
   4  -5   3  576.46   30.34
  -4  -1  -3  573.11   23.69
  -5   4  -3  569.21   24.02
  -1   5  -3  640.72   21.50
  -1  -4   3  578.51   22.85
   5  -1   3  595.75   23.71
   1  -5  -3  608.12   24.36
  -5   1   3  583.79   27.60
   1   4   3  580.22   22.96
   5  -4  -3  588.65   22.98
   5  -1   3  587.77   25.06
  -1  -4   3  630.36   28.62
   1  -5  -3  614.43   20.92
   1  -5  -3  583.08   26.47
  -5   4  -3  571.11   21.03
   1  -5  -3  587.76   21.79
   4  -5   3  601.40   23.10
   4   1  -3  552.49   24.95
  -1  -4   3  558.52   25.27
  -1   5  -3  631.97   24.25
   5  -4  -3  617.64   30.63
   1  -5   3  554.16   28.18
  -1  -4  -3  551.51   23.92
   4  -5  -3  579.59   30.40
  -5   1  -3  587.58   23.60
   4   1   3  603.58   28.18
   1   4  -3  564.13   22.68
  -1  -4  -3  598.76   22.71
   5  -1  -3  601.61   22.58
   5  -1  -3  615.65   24.34
   5  -1  -3  569.36   23.63
   4  -5  -3  600.51   20.64
  -4  -1   3  580.49   26.91
   1  -5   3  545.77   24.21
   1  -5   3  594.14   21.05
  -4  -1   3  502.69   27.51
  -1  -4  -3  583.60   24.64
  -4   5  -3  588.46   26.83
   1  -5   3  629.65   22.94
  -5   1  -3  586.62   25.91
   5  -4   3  576.90   27.98
   5  -1  -3  616.93   28.34
   4  -5  -3  607.80   28.64
   1   4  -3  568.15   26.88
   4  -5  -3  568.03   24.40
   5  -1  -3  558.85   29.28
  -1  -4  -3  605.04   25.07
  -4  -1   3  533.69   23.69
   4   1   3  589.66   23.66
   5  -4   3  596.30   24.20
  -1  -4  -3  551.82   23.68
  -5   4   3  581.53   23.21
   5  -1  -3  563.59   27.46
   4  -5  -3  593.53   23.62
   5  -4   3  584.58   30.58
  -5   4   3  582.51   22.02
  -5   1  -3  599.40   23.34
  -5   4   3  592.68   23.29
  -5   1  -3  584.84   27.51
  -4   5  -3  589.13   22.00
  -1  -4  -3  583.41   20.39
   5  -4   3  615.32   25.04
  -4   5  -3  614.51   25.97
   4   1   3  585.08   24.16
   5  -4   3  593.34   21.71
   1  -5   3  568.10   21.73
  -4  -1   3  568.74   22.87
  -5   1  -3  583.90   26.22
   1  -5   3  594.97   23.62
   4   1   3  538.40   24.51
   4   1   3  551.69   23.45
  -5   4   3  641.38   30.05
  -1   5   3  562.99   23.16
   1   4  -3  610.56   22.67
   4   1   3  585.57   23.02
   0   5  -3 1052.58   36.13
  -5   0   3 1051.83   42.83
   0   5  -3 1070.41   41.58
  -5   0  -3 1040.60   37.73
   5  -5  -3 1036.38   37.59
   0   5   3 1038.98   34.03
  -5   5  -3 1080.28   36.99
   0  -5  -3 1048.72   36.10
  -5   5  -3 1042.56   34.68
   5  -5  -3 1040.74   37.86
   5  -5   3 1040.52   42.44
   5   0   3  954.00   42.03
   5  -5   3 1036.32   38.87
   0  -5   3 1016.54   36.47
   5   0  -3 1024.34   38.40
   0   5  -3 1058.94   35.89
   5  -5  -3 1028.43   37.94
   5  -5   3 1068.02   35.00
   0  -5  -3 1032.93   34.74
  -5   0  -3 1011.09   39.43
  -5   0  -3 1010.24   42.08
  -5   5   3 1030.69   38.26
   0   5  -3 1077.68   42.12
   5   0  -3 1060.53   38.11
  -5   0   3 1051.88   36.82
   5  -5  -3 1070.87   35.63
  -5   0  -3 1068.58   39.64
  -5   0  -3 1021.17   38.14
   0   5   3 1020.94   39.60
   5   0   3  960.28   40.24
   5  -5  -3 1076.50   45.26
   5   0  -3  994.61   40.72
   0  -5  -3 1041.36   39.51
   5  -5   3 1014.46   45.19
  -5   0   3 1036.29   37.98
  -5   0  -3 1006.81   39.29
   5   0   3 1039.55   38.01
   0  -5   3  986.12   38.12
   0  -5  -3 1062.12   37.87
   5   0   3 1033.80   37.80
   5   0   3 1058.26   39.42
   0  -5   3 1026.66   42.15
  -5   0   3 1069.62   37.90
   5   0  -3 1056.66   36.79
   0  -5  -3 1060.86   37.32
   5  -5   3 1070.76   38.24
   0   5   3 1045.45   37.52
  -5   0   3 1086.31   41.82
  -5   5  -3  986.76   41.51
   5   0  -3 1082.60   42.34
  -5   5  -3  985.44   41.33
   0   5   3 1052.17   34.60
   5   0  -3  990.92   42.58
   3  -6   3    4.62    6.18
  -3  -3   3  -10.70    9.47
  -6   3   3  -12.97    6.79
  -3   6  -3   -4.29    6.64
  -6   3   3   -5.99    4.83
  -3  -3  -3   -8.67    5.30
   3  -6   3   11.38    9.74
   3  -6  -3    4.00    7.15
   3   3  -3    0.24    4.74
   3   3   3    5.68   11.14
   3   3  -3   -1.48    2.73
   3   3  -3    1.09    2.76
  -3  -3   3    3.58    5.49
  -3  -3  -3   -5.66    3.92
   6  -3   3   -7.83    7.60
  -3   6  -3   -1.21    3.56
  -3  -3  -3   -5.95    6.02
   3   3  -3    9.76    9.62
  -3   6  -3    1.31    4.51
   3   3   3    1.53    6.53
   3  -6  -3    0.85    7.68
   6  -3  -3    0.20    6.13
   6  -3  -3    2.22    5.09
  -6   3   3   -1.10    4.07
   3   3   3    0.26    5.54
  -3  -3  -3   10.52   10.42
   3   3   3    4.92    6.48
  -6   3  -3   10.05   10.31
  -3  -3   3   -5.90    4.49
   6  -3  -3   -4.60   10.18
   6  -3   3    0.15    9.31
   6  -3   3    9.19    9.16
   6  -3   3    9.96    6.31
   3  -6   3    3.70    3.72
  -6   3   3   -5.09    5.41
  -3  -3  -3   -7.62    6.62
   6  -3  -3   -3.94    7.65
   3   3   3   -3.87    4.51
   6  -3   3    3.73    5.40
   3  -6  -3   -8.83    4.92
  -3  -3   3    3.51    6.05
   3  -6   3   -2.78    4.19
  -6   3  -3   -6.55    6.00
  -3  -3   3   -4.99    7.06
  -6   3   3   -2.32    9.04
   3  -6  -3   -0.66    9.83
   6  -3  -3    4.87    8.87
   3   3   3    0.63    3.89
  -6   3  -3    4.95    7.56
   3  -6   3    5.86    6.95
  -6   3  -3    2.46    4.52
   6  -3  -3    4.32    5.36
  -3  -3  -3    8.88    5.93
   3  -6  -3    2.75    5.81
   6  -3   3   10.67    6.22
   3   3  -3    7.95    5.55
  -6   3  -3   -5.04    6.99
   3   3  -3    7.50    9.37
   4  -6   3   15.91    3.74
   6  -2   3   15.53    6.77
   2   4   3   17.17    6.30
  -4  -2  -3   18.14    6.15
   6  -2   3   10.88    6.00
  -2   6  -3   14.84    6.63
  -6   4  -3   16.51    4.84
  -4  -2  -3   24.02    7.10
  -2  -4   3   14.97    6.50
   4   2  -3   26.01   12.91
   2  -6  -3   16.49    4.32
   6  -4  -3   30.06   11.28
   2   4   3    3.12    5.98
  -2  -4   3   34.86   12.74
   4   2  -3   10.93    5.57
  -6   4  -3   21.91    7.27
  -4  -2  -3   21.48    7.50
  -6   2   3   13.70    5.00
   4   2  -3   14.87    5.67
   2  -6  -3   12.06    3.49
   2  -6  -3   27.97    7.88
  -4  -2  -3   21.99    9.14
   2  -6  -3   21.58    6.30
   2  -6  -3    7.94    6.27
  -2   6  -3   18.71    9.75
   6  -2   3   19.96    8.85
   6  -2   3   39.49   11.47
   4  -6   3   16.86    8.37
   2  -6  -3   17.61    7.37
  -2  -4   3   18.34    6.34
   2   4   3   22.74    5.11
  -2   6  -3   29.37    4.67
   2  -6  -3    7.57    9.04
  -6   2   3   18.89    8.76
   6  -4  -3   37.34   11.66
  -4  -2  -3   24.38    6.95
   4  -6   3   17.19    3.73
   2   4   3   21.75    3.44
   6  -2   3   11.65    6.39
  -2  -4   3   11.97    6.19
   4   2  -3    7.33    9.31
  -6   2   3    1.49    8.67
  -2   6  -3   20.14    4.07
   4  -6   3   21.86    5.93
   6  -4  -3   21.61    5.69
  -4  -2  -3   15.67    5.82
  -6   2   3   27.34    6.98
  -6   2   3   13.43    5.56
   4   2  -3    6.37    6.43
   6  -4  -3   14.49    5.71
  -6   4  -3   23.75    7.29
   6  -4  -3   18.30    7.26
   2   4   3   20.83    6.87
   4  -6   3   16.17   11.04
   6  -4  -3   10.63    6.78
  -2   6  -3   31.06    6.25
  -6   4  -3   22.17    9.08
   4  -6   3   14.49    8.00
   4   2  -3   19.29    5.11
   6  -2   3    9.90    8.24
   2   4   3   21.55    6.85
  -2  -4   3    9.80    9.06
  -4  -2   3   14.35    5.87
   4   2   3   12.05    8.43
   6  -4   3   11.38   11.16
  -2   6   3   11.68    5.97
   6  -2  -3   27.70    6.17
   2   4  -3   12.70    5.89
  -4  -2   3   23.70   10.29
   2  -6   3   18.27    4.88
   4   2   3    7.38    5.88
  -6   2  -3   26.26   10.06
   6  -2  -3    8.91    5.84
   4   2   3   38.30   10.41
   2  -6   3    8.69    6.93
   2   4  -3   15.72    8.73
   6  -4   3   17.14    7.80
   2   4  -3   17.77    9.17
  -2  -4  -3   17.55    7.05
  -2  -4  -3   36.39    6.28
  -6   2  -3   16.93    6.78
  -6   4   3    9.73    5.89
  -6   4   3   12.55    6.08
   4   2   3    2.39    6.37
   6  -4   3   21.71    9.98
  -4   6  -3   19.96    4.77
  -4   6  -3   10.98    7.79
   4  -6  -3   11.48    8.35
  -4   6  -3   17.17    9.01
   2  -6   3   13.56    5.28
   6  -4   3   15.18    5.75
  -4   6  -3   17.16    4.45
   6  -2  -3   23.39    9.08
  -4  -2   3   15.87    5.99
   4  -6  -3   23.90   11.24
   2  -6   3   17.65    5.52
  -6   2  -3   28.74    8.82
   4  -6  -3   12.53    7.23
   6  -4   3   17.23    6.45
  -4  -2   3   14.50    7.08
  -6   4   3   23.30   11.00
  -2  -4  -3   13.74    6.49
  -2  -4  -3   15.99    3.62
   4   2   3   15.09    5.59
   4  -6  -3   11.27    5.53
  -6   4   3   12.37    5.75
   6  -4   3   21.21    6.86
   2   4  -3   15.85    5.41
  -2  -4  -3   27.48    9.28
   6  -2  -3   12.98    9.82
   4  -6  -3   14.41    5.97
   6  -2  -3   31.13    8.08
  -6   2  -3   28.36    8.64
  -2  -4  -3   14.61    6.37
   2  -6   3   12.34    5.17
  -6   2  -3   14.45    5.71
  -4  -2   3   17.64    9.72
   2  -6   3   18.99   10.48
   4   2   3   18.55    4.88
   5  -6   3    8.09    7.69
  -5  -1  -3    8.86    5.58
  -6   1   3    3.13    9.28
   1   5   3    5.68    5.51
   5  -6   3    2.60   11.05
  -6   5  -3    7.37    8.75
   1  -6  -3    9.16    6.57
   5   1  -3    7.06    9.31
   5   1  -3    3.32   11.18
  -6   5  -3   12.66    7.12
   6  -5  -3    9.75    6.15
  -1  -5   3   -0.43    6.86
   5  -6   3    7.68    5.26
   1  -6  -3   -1.79    4.10
  -1  -5   3   -7.77    6.56
   1  -6  -3    2.46    5.09
  -1   6  -3    9.96    8.97
   6  -1   3   -4.32    5.21
  -1   6  -3    4.89    4.46
  -6   1   3    0.31    5.50
   5   1  -3    5.33    5.85
   1  -6  -3    7.04    4.59
  -6   1   3    4.14    5.07
   5   1  -3    6.16    6.56
  -5  -1  -3    6.86    6.81
   5  -6   3   -7.95    7.82
   5  -6   3   13.44    3.93
   1   5   3    6.39    5.99
   6  -5  -3    1.29    4.70
   1   5   3   11.99    6.63
   1   5   3    3.41    6.62
   5   1  -3    3.29    6.46
  -1   6  -3    2.55    6.17
   5   1  -3   11.53    6.04
  -1  -5   3    0.20    5.57
  -6   1   3   -0.68    8.79
  -5  -1  -3    2.01    6.28
   6  -1   3   11.53    8.52
  -5  -1  -3    5.30    9.20
  -6   5  -3   -0.93    3.89
  -6   5  -3   12.00    6.33
  -6   1   3   12.39    5.94
   1   5   3    7.09    4.05
   1  -6  -3    7.51    8.29
   1  -6  -3   -1.79    6.84
  -1  -5   3   15.54   12.02
   6  -1   3    8.81    7.84
  -1   6  -3    0.34    3.89
   6  -1   3   11.94    6.86
   6  -1   3    3.60    9.34
   6  -5  -3    4.61    6.31
  -5  -1  -3    9.36    6.38
   6  -5  -3   10.79    6.61
   6  -5  -3    5.86    9.90
  -1  -5   3    4.69    5.65
   6  -5  -3   -2.26   10.89
   6  -1   3    0.05    6.36
  -5   6   3  -13.78    7.29
  -5  -1  -3    0.07    6.89
   6  -5   3   19.45    9.91
   6  -5   3   12.24   11.67
  -5  -1   3    1.66    5.41
  -5  -1   3    3.71    6.64
   5   1   3    2.38    8.28
  -5   6  -3    3.33    4.59
  -6   1  -3    3.95    6.01
   5  -6  -3   13.00    4.44
  -6   1  -3   -0.51    8.59
   6  -1  -3   -0.19    5.19
   1  -6   3   10.68    5.31
  -5  -1   3    3.67    8.27
  -6   5   3   -1.98   10.61
   5  -6  -3   -4.80    8.92
   5  -6  -3   -1.24    5.49
   6  -5   3   11.79    6.84
  -1   6   3    5.40    5.48
  -5   6  -3   -0.75    8.35
   1  -6   3    2.03    5.70
   6  -1  -3    3.75    9.08
   6  -1  -3   -2.78    8.84
  -1  -5  -3    7.50    3.29
   5   1   3    3.12    5.97
  -5  -1   3    1.28    5.66
   1  -6   3   -2.77    6.83
   1   5  -3   -0.09    7.90
  -6   1  -3    1.96    7.44
  -6   5   3    6.45    4.58
   1  -6   3    1.22    4.92
  -1  -5  -3   15.69    6.74
   1  -6   3    4.50    3.67
   5   1   3   13.83    7.12
  -6   1  -3    8.03    8.46
   5   1   3   11.66    6.08
  -1  -5  -3   10.88    5.97
   6  -1  -3    8.70    9.28
  -6   5   3   -1.00    5.42
   1   5  -3    5.22    4.99
  -6   5   3   -0.03    6.71
  -5  -1   3    2.92    9.87
   6  -5   3    6.12    6.86
   5   1   3   12.89   10.19
   6  -1  -3    1.03    6.93
   5  -6  -3    2.37   10.45
   5  -6  -3    1.25    6.69
  -6   1  -3    0.98    6.67
  -5   6  -3    9.15    8.25
   1  -6   3    7.34    9.51
   6  -1  -3    9.65    5.63
  -1  -5  -3   -1.42    6.01
  -1  -5  -3    8.06    8.07
  -1  -5  -3    3.66    6.27
   1   5  -3   10.81    8.15
   1   5  -3    7.03    5.61
   6  -5   3    4.98    4.76
  -6   1  -3    1.83    4.42
   5   1   3    8.81    5.31
   0  -6  -3 1331.73   46.46
  -6   0  -3 1246.89   45.32
   6  -6  -3 1247.15   54.50
   6  -6  -3 1297.43   51.23
  -6   0  -3 1170.31   50.15
  -6   6  -3 1262.54   47.08
  -6   0   3 1183.38   50.37
   6  -6   3 1215.12   42.19
   6  -6  -3 1248.11   43.05
   0   6   3 1245.48   40.75
   6   0   3 1212.35   47.27
   6   0  -3 1355.72   51.65
  -6   0   3 1279.76   48.13
  -6   0   3 1260.83   45.77
   6  -6  -3 1234.75   44.74
   0  -6  -3 1336.42   43.91
   6   0   3 1258.77   51.21
   0  -6  -3 1296.28   45.74
   0   6   3 1239.93   47.93
   0   6  -3 1244.88   45.85
  -6   0   3 1224.86   49.50
   0  -6   3 1295.47   44.96
   0  -6  -3 1236.20   44.63
   6   0  -3 1202.02   45.45
   0   6   3 1234.79   41.19
  -6   0   3 1307.20   44.57
   6   0  -3 1222.05   44.32
   0   6   3 1234.99   44.55
  -6   0  -3 1262.67   47.87
   0  -6   3 1258.39   44.31
   6   0   3 1263.89   46.16
   0  -6  -3 1251.04   41.41
  -6   0  -3 1283.06   48.35
   6  -6   3 1265.75   46.82
   0   6  -3 1253.45   43.51
   6   0  -3 1275.28   48.27
   6   0   3 1289.37   45.52
   6  -6  -3 1200.81   45.39
   0  -6   3 1223.69   50.14
   6  -6   3 1280.05   50.85
  -6   6  -3 1223.52   43.96
  -6   6   3 1197.32   45.78
   0   6  -3 1245.88   49.68
   6   0   3 1246.09   45.89
   0  -6   3 1329.83   46.59
   6   0   3 1266.07   45.76
   0  -6   3 1303.02   45.91
   6  -6   3 1248.38   44.88
  -6   0  -3 1245.06   45.90
   6   0  -3 1271.36   46.19
   0  -6  -3 1276.97   47.96
   6   0  -3 1290.83   50.76
   6  -6  -3 1308.61   43.46
  -6   6  -3 1215.20   50.31
   6  -6   3 1120.29   56.99
  -6   0  -3 1220.20   45.15
   3  -7  -3   72.18   14.37
  -7   4  -3   77.26   11.61
  -3  -4   3   86.29    9.64
  -3  -4   3   77.69   12.43
   4   3  -3   83.33    7.32
   3  -7  -3   78.22   10.09
   4   3  -3   88.19   10.06
   4  -7   3   75.10    6.19
   7  -4  -3   71.27    8.34
   7  -4  -3  116.39   11.70
  -3   7  -3   89.08    6.88
   4   3  -3   91.57    7.14
   7  -3   3   75.38   12.74
   3   4   3   89.84   10.73
   7  -4  -3   77.10   10.84
  -7   4  -3   84.94    8.12
   4   3  -3   98.08   15.61
  -4  -3  -3   87.08   10.40
  -7   3   3   70.05   11.55
   4  -7   3   85.92    7.61
  -4  -3  -3   88.70   10.86
   3  -7  -3   95.23    6.74
  -4  -3  -3   88.56   13.56
  -4  -3  -3   79.16    9.79
   7  -4  -3   78.21   14.69
  -3  -4   3   96.58   10.57
  -3   7  -3   95.89    7.32
   3  -7  -3   96.22    7.11
  -3  -4   3   84.40   14.50
   4   3  -3   75.02   13.68
   7  -3   3   83.90   13.78
   3   4   3   83.83   10.35
   3  -7  -3   82.32    9.13
  -7   3   3  114.63   16.29
  -7   3   3   82.38    9.55
   7  -4  -3  108.73   10.75
   7  -3   3   73.93   11.71
   3   4   3   72.47    9.94
  -7   4  -3   90.44   10.06
   4  -7   3   70.87   14.64
   3  -7  -3   83.17   11.01
   4  -7   3   84.31   11.09
   7  -3   3   65.79    7.60
   3   4   3   75.11    8.84
  -4  -3  -3   85.81    8.56
   4   3  -3   87.36    9.45
   7  -3   3  113.67   10.92
  -3  -4   3  124.57   11.97
   4   3  -3   95.03    9.07
   4  -7   3   90.92    8.30
   3   4   3   94.34    7.31
   3  -7  -3   79.00   10.24
  -7   3  -3   92.21   12.55
   3   4  -3   90.51    9.65
  -4   7  -3   89.03    7.63
  -7   3  -3   64.20   12.10
   7  -3  -3   80.98   15.33
   4   3   3  110.97   12.51
   4  -7  -3   73.40   11.56
   4  -7  -3   76.96   10.23
  -7   3  -3   87.39    8.73
  -3  -4  -3   85.12   10.28
   4   3   3   78.26    6.90
   3   4  -3   84.28   13.24
   3  -7   3   98.28    7.46
   7  -4   3   95.55    9.72
   7  -3  -3   99.77   15.82
   3   4  -3   95.86   14.12
  -7   3  -3  104.94   15.52
  -3  -4  -3   83.56    6.94
   3   4  -3   81.39    9.50
   3  -7   3   62.83    7.41
   7  -3  -3   73.44    8.94
   7  -3  -3   71.38    8.34
  -4   7  -3   82.93    6.88
  -7   4   3   91.44   15.49
  -3  -4  -3   91.26   12.00
   7  -4   3   73.14   10.12
   4  -7  -3   92.22   15.39
  -3  -4  -3   85.76   10.85
  -4  -3   3  104.10   11.54
  -4  -3   3   65.72    8.94
   7  -4   3   67.58   11.96
   3  -7   3   83.72   15.40
   3  -7   3   70.63    9.16
  -3  -4  -3   65.75   10.65
   4   3   3   94.33    9.50
   4   3   3  117.25   14.96
   7  -3  -3   88.30   12.19
   4   3   3   54.33    9.05
   3   4  -3   83.87    9.20
   4  -7  -3   83.34    8.92
  -4  -3   3   71.49   11.38
   7  -4   3   87.98   15.15
  -7   4   3   81.24    9.31
  -4   7  -3   68.28   11.11
  -4  -3   3   89.81   14.05
   4  -7  -3   88.70   16.18
   7  -4   3   84.80    9.86
   7  -3  -3   82.13   10.74
  -7   3  -3   76.83    9.75
  -3  -4  -3   75.39    9.63
  -7   2   3  824.89   31.27
   7  -2   3  829.42   36.00
  -7   5  -3  815.18   30.11
   7  -5  -3  776.24   39.20
   7  -5  -3  782.46   31.81
   2  -7  -3  868.30   33.72
   5   2  -3  844.36   32.90
  -5  -2  -3  853.69   34.34
   5   2  -3  867.46   40.93
  -2  -5   3  800.59   33.15
   5  -7   3  862.61   28.29
   5  -7   3  801.75   34.93
  -5  -2  -3  792.32   32.83
   2  -7  -3  801.14   29.39
   2  -7  -3  857.80   38.63
   5   2  -3  841.67   30.81
   2  -7  -3  817.95   32.50
   7  -2   3  784.83   36.24
   2  -7  -3  843.02   29.14
   2   5   3  803.04   30.17
   7  -2   3  833.85   34.01
   7  -5  -3  807.91   33.07
  -7   2   3  809.77   36.74
  -7   2   3  832.88   33.24
   5   2  -3  839.70   32.30
   7  -2   3  849.69   33.48
   5  -7   3  868.82   28.48
  -7   5  -3  782.11   33.13
   2   5   3  810.92   33.56
  -7   2   3  826.17   38.11
  -2  -5   3  781.24   32.43
   2  -7  -3  793.64   31.24
   7  -5  -3  825.77   33.53
   5  -7   3  816.54   36.30
  -5  -2  -3  789.78   33.06
  -2   7  -3  835.77   30.25
   2   5   3  827.28   33.14
  -2  -5   3  813.02   32.82
  -7   2   3  802.50   32.09
  -7   5  -3  816.74   38.77
   2   5   3  821.07   27.40
  -5  -2  -3  817.79   38.14
   5   2  -3  850.58   33.52
   2  -7  -3  800.45   33.97
  -2   7  -3  861.07   29.72
   5  -7   3  852.56   31.25
  -7   5  -3  893.70   33.62
  -2  -5   3  805.50   38.42
   7  -5  -3  881.06   41.32
   2   5   3  809.48   32.83
  -5  -2  -3  819.95   33.20
   2   5   3  806.61   32.50
  -2  -5   3  810.84   40.75
   7  -5  -3  775.55   31.63
   7  -2   3  863.51   42.19
   5  -7   3  791.54   41.70
  -2   7  -3  837.42   38.89
   5   2  -3  755.68   39.13
  -2  -5  -3  851.35   33.57
   2   5  -3  837.85   36.71
  -7   2  -3  823.52   37.60
   2  -7   3  841.06   30.43
  -7   5   3  809.03   32.10
  -5   7  -3  829.93   28.60
  -2  -5  -3  862.76   32.60
   7  -5   3  845.45   31.56
   2  -7   3  798.46   38.91
  -2  -5  -3  809.19   33.15
  -7   2  -3  807.09   32.02
   5  -7  -3  873.60   31.53
   2  -7   3  852.32   34.57
  -7   2  -3  867.53   33.02
   7  -2  -3  828.93   41.66
   5   2   3  856.72   32.66
   5  -7  -3  818.40   28.23
  -5  -2   3  849.04   36.95
   7  -2  -3  820.09   39.34
  -5   7  -3  871.36   35.43
   7  -2  -3  789.45   31.42
   7  -2  -3  770.38   32.91
   7  -5   3  867.42   34.52
  -5  -2   3  811.53   33.07
  -7   2  -3  858.79   37.58
   5  -7  -3  808.68   31.50
  -7   5   3  859.35   31.45
   2  -7   3  847.67   31.33
   7  -5   3  834.83   33.23
  -2   7   3  872.79   34.03
  -2  -5  -3  836.75   27.72
  -5  -2   3  839.93   33.37
   7  -5   3  807.59   48.79
   5  -7  -3  826.37   41.17
   2  -7   3  789.35   31.52
   7  -2  -3  933.60   34.57
   5  -7  -3  785.14   33.39
   5  -7  -3  869.81   37.69
   2   5  -3  759.97   34.33
   2  -7   3  847.75   30.63
  -2  -5  -3  844.47   36.50
  -5  -2   3  808.06   38.57
   5   2   3  804.58   32.82
  -5   7  -3  821.52   28.49
  -7   5   3  854.32   32.30
  -5  -2   3  818.94   32.24
   2   5  -3  814.48   32.14
  -7   2  -3  818.31   37.47
   5   2   3  820.45   33.50
  -2  -5  -3  803.79   34.35
   5   2   3  828.19   30.78
   7  -2  -3  918.34   38.30
  -5   7  -3  826.74   37.23
   5   2   3  836.59   36.52
  -7   5   3  879.47   40.99
   7  -5   3  848.30   39.06
   5   2   3  812.20   37.85
   7  -1   3  201.15   16.11
   7  -6  -3  145.20   20.42
   1   6   3  139.21   11.82
   1  -7  -3  165.36   11.51
  -1   7  -3  145.84    9.44
  -7   6  -3  152.88   14.03
  -6  -1  -3  184.75   14.83
   6   1  -3  153.92   14.06
  -1  -6   3  127.90   11.55
   1  -7  -3  141.12   17.82
  -7   6  -3  129.32   16.23
   7  -1   3  138.05   16.46
  -6  -1  -3  162.93   17.58
  -7   1   3  141.60   12.34
   6  -7   3  165.37   21.55
  -7   1   3  126.68   14.99
   6  -7   3  164.80    8.98
   7  -6  -3  109.36   15.02
   6  -7   3  142.53   12.00
   6  -7   3  126.10   14.45
   6   1  -3  151.55   13.71
  -7   1   3  132.94   11.95
   1  -7  -3  146.28   10.22
  -6  -1  -3  168.44   13.52
  -7   1   3  137.41   16.12
  -6  -1  -3  154.93   13.29
   6   1  -3  153.80   13.39
   7  -1   3  166.26   14.54
   6  -7   3  142.77   18.83
  -1  -6   3  119.20   16.49
   6  -7   3  133.19    9.61
  -1   7  -3  139.15   11.36
   7  -1   3  134.93   14.61
  -1  -6   3  167.72   13.80
   6   1  -3  189.24   20.53
   7  -1   3  139.95   12.52
   1   6   3  123.11   14.31
   7  -6  -3  151.96   12.63
  -7   6  -3  157.19   12.62
  -6   7   3  160.94   14.10
   6   1  -3  172.13   19.59
  -7   6  -3  148.14   10.24
   1  -7  -3  170.11   11.36
   6   1  -3  136.82   11.53
   1   6   3  130.95   10.74
   1  -7  -3  141.47   12.53
   7  -6  -3  145.32   12.18
  -6  -1  -3  156.88   15.80
   1  -7  -3  138.74   12.84
   7  -1   3  161.75   15.68
  -7   1   3  170.54   13.74
   1  -7  -3  122.10   12.59
  -1  -6   3  106.11   11.73
  -6  -1  -3  149.67   14.43
   6  -7   3  145.35   14.04
   7  -6  -3  134.25   11.61
   1   6   3  142.29    9.22
  -1   7  -3  162.88   11.22
  -1  -6   3  131.57   12.23
   7  -6   3  147.64   11.58
   1   6  -3  162.80   12.18
  -6  -1   3  151.68   13.08
  -6   7  -3  136.51   18.23
   1  -7   3  152.31   12.28
   7  -1  -3  127.86   18.66
   6  -7  -3  136.25   12.27
  -1  -6  -3  129.62   13.14
   6   1   3  214.20   21.33
   7  -1  -3  172.62   14.30
  -7   6   3  139.05    9.09
   6  -7  -3  159.82   16.25
   7  -1  -3  134.25   15.22
   1  -7   3  106.40   12.86
  -6   7  -3  147.73   14.23
  -7   1  -3  140.36   17.30
  -1  -6  -3  159.13   17.91
   1  -7   3  148.72    8.46
  -1  -6  -3  148.24   13.49
  -7   1  -3  113.63   10.57
   7  -6   3  153.97   13.47
  -6  -1   3  166.36   17.99
  -1   7   3  163.14   13.28
   6  -7  -3  146.34   12.96
  -6   7  -3  128.74   10.11
   6  -7  -3  130.34   18.49
  -7   1  -3  158.19   15.79
   1   6  -3  150.92   17.13
  -7   6   3  156.89   12.13
  -7   1  -3  145.65   12.76
   6  -7  -3  137.22   10.00
   6   1   3  145.35   13.56
   1  -7   3  141.54   13.12
  -7   1  -3  146.22   16.85
   1  -7   3  119.58   16.43
   7  -1  -3  126.92   11.59
   1  -7   3  146.26   12.16
   7  -1  -3  155.62   14.25
  -1  -6  -3  162.42   13.21
   7  -6   3  133.21   16.57
   6   1   3  166.58   12.88
  -1  -6  -3  171.52   14.55
   7  -6   3  132.52   18.78
   1   6  -3  137.10   10.57
   6   1   3  140.94   12.84
   7  -1  -3  149.51   17.39
   6   1   3  158.56   14.20
   6   1   3  141.06   15.22
  -7   6   3  153.44   13.33
  -1  -6  -3  166.93    7.70
  -6  -1   3  150.43   18.12
   7  -6   3  144.60   13.52
  -6  -1   3  159.48   14.07
   1   6  -3  155.47   14.76
   1  -7   3  122.08   11.02
  -7   0  -3   37.46   10.80
   0  -7   3   30.24    7.32
  -7   0   3   37.50   11.13
   7  -7  -3   29.40   14.89
   7   0   3   13.41    8.42
  -7   0   3   31.36    7.79
  -7   7  -3   21.94    9.65
  -7   7   3   30.61    9.36
   7   0   3   29.16   10.99
  -7   0   3   16.16   10.72
   0  -7   3   21.68    7.33
   7  -7   3   19.59    7.13
   7   0   3   27.79    8.28
  -7   0  -3    7.84   11.85
   7  -7   3   31.48    6.07
   7   0  -3   20.17   11.22
  -7   0   3   31.44    7.58
   0   7  -3   18.43   10.71
   0   7  -3   25.14    8.00
  -7   0  -3   26.20    8.03
   7  -7   3   25.41   11.96
   7   0  -3   31.18    9.50
   7   0  -3   28.80    8.11
   7   0  -3   13.92    8.47
   7   0   3   14.50    7.61
   7   0   3   29.16   13.39
   7   0   3   21.67    6.94
   0  -7  -3   25.19    4.49
   0  -7  -3   30.83    5.80
   0  -7  -3   16.44    6.85
   0  -7  -3   33.78    9.81
   0  -7  -3   25.81   11.08
   0  -7   3   16.46    7.55
   7  -7   3   13.71    9.24
   0  -7   3   30.77   13.07
   7  -7  -3   21.30    6.34
   0  -7  -3   17.43    6.96
  -7   7  -3   27.24   11.32
   7   0  -3   30.58   13.15
   0   7   3   18.78    7.36
  -7   7  -3   25.11    6.83
   0   7   3   26.72    3.89
  -7   0  -3   17.03    7.94
  -7   0  -3   30.69    7.56
   0   7   3   28.83    4.51
   7  -7  -3   23.51    6.16
   0   7   3   33.94   10.39
  -7   0  -3   47.36   11.34
  -7   0   3   13.00    7.40
   0  -7   3   23.11    9.18
   0   7  -3   32.90    5.66
   7  -7  -3   29.70   11.16
   7  -7   3   43.47   14.24
   0   7  -3   32.10    6.72
   8  -4  -3   -1.68    7.60
  -4  -4  -3   12.12    8.12
  -4  -4   3  -22.95   10.32
   4   4   3    3.05    6.83
   8  -4  -3   -0.73    6.83
   4  -8   3   -6.78    4.27
   4   4   3   -1.31    5.51
   4   4  -3  -11.05   10.33
  -4  -4  -3   -0.06    9.23
   4   4   3   -2.09    6.96
   4  -8   3    3.99    7.80
  -8   4  -3  -13.20    6.43
   4   4   3    2.54    4.31
  -4  -4  -3  -11.73    8.01
   4  -8   3   10.74    9.57
  -4  -4   3   -1.18    6.88
   8  -4   3   -3.67    8.54
   4  -8  -3   -0.51   11.63
  -8   4   3    9.20    6.55
   8  -4   3   -5.25    9.77
  -8   4  -3   -2.05    9.57
   4   4  -3   -1.54    6.32
  -4  -4  -3   -9.91    7.37
   8  -4   3   10.26   11.69
   4   4   3    8.15   14.76
  -8   4   3   -1.92    8.98
  -8   4   3  -18.43   11.11
   4   4  -3    2.65    7.23
   8  -4  -3  -16.94    5.66
   8  -4   3   -8.81    7.16
   4  -8  -3    1.04    7.99
   4  -8  -3   -0.96    6.07
  -8   4  -3    6.72    9.18
   4   4  -3   17.37   10.89
   8  -4   3  -16.00    6.57
   8  -4  -3    0.19   10.93
   8  -4  -3   -0.75   11.32
   4  -8  -3    8.71    7.88
   8  -4   3   -1.84    6.74
   4   4  -3   -2.26    6.36
   4  -8   3    1.57    5.36
  -4  -4   3   -3.98    6.69
  -4  -4  -3   -3.43    5.55
  -4  -4  -3    0.96    7.02
  -4  -4   3   -0.59    7.78
   4  -8  -3   -3.94    7.53
  -8   4  -3   -0.02    5.52
  -8   4   3   -9.14    7.46
   4  -8   3   11.12   13.42
   4   4   3    1.99    8.07
  -4  -4   3   -6.21    6.86
   8  -4  -3    8.18    9.10
   4  -8  -3    5.96    3.43
   5   3  -3   36.48    5.26
   3  -8  -3   25.11   12.32
   8  -3   3   27.51    8.95
  -5  -3  -3   27.12    9.00
   8  -5  -3   44.33   14.55
   3   5   3   18.29    8.44
   5   3  -3   22.07   11.64
   3  -8  -3   31.89    9.90
   5  -8   3   41.98    9.92
  -3  -5   3   21.33    9.83
   8  -5  -3   21.05   13.26
  -8   3   3   22.71    7.20
  -5  -3  -3   46.05    8.74
   8  -5  -3   26.34    7.67
   8  -3   3   37.51    9.01
  -8   3   3   34.56   12.52
   3   5   3   29.90    3.62
   5   3  -3   33.52    7.61
  -8   3   3   28.78    8.35
  -8   5  -3   20.94    8.73
   3  -8  -3   24.30    5.00
   3  -8  -3   28.42    8.07
   8  -3   3   12.32   11.88
  -8   3   3   25.42   10.84
   8  -3   3   34.15    8.98
   3   5   3   20.88    9.46
   5   3  -3   28.60    8.82
   3  -8  -3   30.70    7.88
  -5  -3  -3   26.46    9.32
   5  -8   3   28.26    6.60
  -3  -5   3   39.72    8.33
   5  -8   3   30.80   10.08
   5  -8   3   22.58    4.87
   5   3  -3   32.85    8.19
   3  -8  -3   20.38    7.97
  -8   5  -3   19.36    8.06
   3  -8  -3   38.30    9.88
   3   5   3   20.28    8.53
  -3  -5   3   32.78   14.18
  -5  -3  -3   31.38   11.17
   8  -5  -3   28.56    9.62
   5  -8   3   30.29   14.04
   3  -8  -3   29.93    5.45
   8  -5  -3   26.19    7.64
   3   5   3   35.18    8.75
   8  -3   3   49.27   11.89
   5   3  -3   26.37    5.26
   8  -5  -3   23.48    8.95
  -8   3   3   37.88   12.13
  -5  -3  -3   15.59    7.73
   5  -8   3   23.99    4.65
  -8   5  -3   32.04    6.71
  -8   5  -3   20.81   11.15
   8  -3   3   35.77   11.76
  -3  -5   3   19.76    8.12
   3   5   3   32.87    6.95
  -5  -3  -3   31.18    8.34
  -3  -5   3   24.25    8.53
  -8   5   3   29.36    7.97
   3  -8   3   25.86   13.76
   8  -3  -3   34.50   12.45
   5  -8  -3   38.40    8.92
   8  -5   3   20.88    7.83
  -5  -3   3   23.94    8.36
   3  -8   3   21.78    5.91
   5  -8  -3   31.68    9.90
   5  -8  -3   35.67    7.14
   5   3   3   22.83    6.59
   8  -5   3   35.46   10.37
  -5  -3   3   46.94   11.91
  -5  -3   3   27.69    8.69
   3  -8   3   35.07   10.06
   5   3   3   31.94    8.79
  -8   5   3   43.34    8.37
   3   5  -3   39.10   11.85
   5  -8  -3   45.23   14.61
   3   5  -3   36.41    8.82
  -3  -5  -3   26.99    8.75
  -8   3  -3   23.82    8.19
   8  -5   3   26.11    7.79
   8  -5   3   37.36    9.10
   8  -3  -3   17.89   12.45
   3  -8   3   29.13    7.17
  -8   5   3   28.18    7.65
   8  -5   3   20.21   11.59
   5  -8  -3   27.29    6.74
  -3  -5  -3   29.58   11.13
  -5  -3   3   15.00    7.61
   5  -8  -3   26.35    4.41
   8  -5   3    8.69   12.51
   5   3   3   12.69    7.52
   5   3   3   36.20   10.76
   3   5  -3   30.54    6.91
  -8   3  -3   38.63   13.36
   8  -3  -3   24.05    8.87
   8  -3  -3   22.75    7.35
   8  -3  -3   22.18    7.59
   5   3   3   30.15    5.84
  -5  -3   3   37.42   11.69
  -3  -5  -3   10.98    8.41
   5  -8  -3   35.25   13.61
  -8   3  -3   21.85   11.51
  -3  -5  -3   27.61    8.42
  -8   5   3   44.90   15.35
   8  -3  -3   60.40   12.04
  -8   3  -3   44.26   11.30
   5   3   3   34.76   12.27
  -3  -5  -3   16.38    9.34
  -8   3  -3   37.92    7.66
  -3  -5  -3   24.21    4.83
   3  -8   3   32.17    7.84
  -8   6  -3  534.31   22.26
  -6  -2  -3  491.92   25.42
   2  -8  -3  548.14   22.05
   6  -8   3  541.74   19.86
  -2   8  -3  560.45   31.82
  -2  -6   3  554.03   26.31
  -8   6  -3  545.24   32.36
   2  -8  -3  525.03   22.77
   2  -8  -3  524.29   27.34
   8  -6  -3  520.15   24.09
  -8   2   3  530.06   23.97
   6   2  -3  563.27   23.08
   6   2  -3  564.91   25.20
   8  -2   3  564.89   28.59
  -2  -6   3  491.79   26.90
   6   2  -3  580.58   26.38
  -2   8  -3  522.50   21.07
  -2   8  -3  538.66   19.79
   8  -2   3  583.25   31.57
   8  -2   3  540.05   26.36
   6   2  -3  492.25   33.63
  -8   2   3  565.04   30.55
  -6  -2  -3  511.16   27.85
   2  -8  -3  536.83   21.76
  -6  -2  -3  525.10   25.20
   8  -2   3  581.18   26.98
   2   6   3  527.55   26.32
   2  -8  -3  526.81   25.15
   2   6   3  533.28   23.86
   8  -6  -3  528.84   24.78
  -8   2   3  547.52   31.05
   6  -8   3  502.07   27.55
   2  -8  -3  535.50   31.15
   6  -8   3  591.76   23.54
  -2  -6   3  556.26   35.64
   2   6   3  534.96   21.82
   6   2  -3  529.50   36.14
   2   6   3  539.91   25.25
  -8   2   3  489.31   24.31
  -8   2   3  538.14   25.56
  -6  -2  -3  533.39   25.85
   6  -8   3  538.53   29.64
  -2   8  -3  553.87   21.93
   8  -6  -3  511.74   34.26
  -2  -6   3  534.36   25.80
   2   6   3  550.02   25.65
  -8   6  -3  473.93   24.58
   6  -8   3  513.21   20.06
   8  -2   3  515.58   25.33
   2  -8  -3  560.70   24.67
  -6  -2  -3  522.44   31.66
  -2  -6   3  543.71   25.55
   8  -6  -3  515.98   25.75
   8  -6  -3  587.39   32.84
  -8   6  -3  542.07   26.06
   6  -8   3  512.00   34.19
  -2  -6  -3  569.88   31.15
   6  -8  -3  519.51   29.19
   6   2   3  552.49   26.29
   2  -8   3  514.98   23.69
   6   2   3  437.47   30.18
  -2  -6  -3  578.10   25.42
   8  -2  -3  481.98   25.83
   2  -8   3  545.41   23.08
  -8   2  -3  542.58   30.75
   8  -2  -3  491.39   30.80
   6   2   3  552.54   25.62
  -6  -2   3  526.91   25.67
   6  -8  -3  511.45   23.02
   6  -8  -3  527.22   25.80
   2  -8   3  539.51   32.35
  -8   2  -3  583.04   25.88
   2   6  -3  509.28   28.55
   8  -6   3  536.54   35.13
   8  -2  -3  516.65   31.40
   6  -8  -3  568.99   34.15
  -8   6   3  574.04   25.69
   8  -6   3  519.56   25.28
   8  -2  -3  577.25   31.54
  -2   8   3  548.76   24.27
   6  -8  -3  554.40   20.38
   8  -6   3  562.35   32.64
  -2  -6  -3  507.89   25.71
  -6  -2   3  534.42   24.41
  -6  -2   3  526.69   29.29
   8  -2  -3  557.95   27.04
   2  -8   3  528.36   23.59
  -8   2  -3  517.12   30.29
   8  -6   3  498.99   25.84
   2  -8   3  507.40   27.13
   6   2   3  549.87   23.28
  -6  -2   3  570.55   26.76
  -2  -6  -3  495.15   25.77
   6  -8  -3  543.32   23.48
   8  -6   3  544.40   23.83
   2   6  -3  536.73   27.73
   2   6  -3  537.23   23.25
  -8   6   3  514.72   22.16
   2   6  -3  575.29   24.78
  -2  -6  -3  520.50   26.66
   2  -8   3  559.27   22.03
   6   2   3  524.72   25.02
  -8   2  -3  515.64   24.70
  -6  -2   3  553.22   32.08
   6   2   3  509.55   30.37
  -8   2  -3  477.45   31.18
   8  -6   3  548.37   26.32
  -8   6   3  545.02   24.57
  -6   8  -3  577.24   28.29
  -8   1   3   15.95    7.40
  -7  -1  -3   -1.74    7.82
  -7  -1  -3   29.07   10.57
  -7   8   3   16.13    9.20
   1  -8  -3    0.77    8.71
   7  -8   3    3.93   12.57
   7   1  -3   13.19   14.94
  -8   1   3   18.92    7.95
   7  -8   3    9.33    9.22
   8  -7  -3    6.23   13.35
  -8   7  -3   16.51   11.76
  -8   1   3   -5.80   10.57
  -1  -7   3    8.92    7.63
   8  -7  -3    9.66    6.79
   1  -8  -3    3.07    5.83
   1   7   3    3.41    4.20
   7  -8   3    6.30    5.74
   1  -8  -3    7.75   11.34
   7   1  -3    9.87    7.60
  -8   1   3   -0.24    7.44
   7  -8   3   16.24   14.54
  -1   8  -3    8.09    6.71
   7  -8   3    8.02    4.34
   1   7   3   12.04    8.91
  -7  -1  -3   -1.74    7.03
   1   7   3    6.31    7.73
  -1  -7   3    9.50    8.58
   8  -1   3    8.53    7.39
  -8   7  -3    8.72    5.32
  -8   7  -3   18.17    9.65
   1  -8  -3   17.34    6.44
  -7  -1  -3   18.70   10.21
  -1  -7   3   12.04   13.43
   8  -7  -3    5.67    5.77
   1  -8  -3   11.49    4.99
   8  -7  -3   -1.88   10.99
   8  -7  -3   16.16    7.34
   7   1  -3   17.14   14.23
   8  -7  -3    2.10    7.08
  -7  -1  -3    8.57    8.30
   7  -8   3   10.16    5.01
   7   1  -3    2.77    7.16
   8  -1   3   11.35    8.22
  -1   8  -3    6.08    4.70
   7  -8   3   16.33   10.58
  -8   1   3   11.00   11.30
   8  -1   3   22.01   13.22
  -1   8  -3    3.48    5.58
   1   7   3    8.12    5.55
   7   1  -3    8.44    7.87
   8  -1   3   -2.58    7.86
   8  -1   3   -0.08    7.36
  -1  -7   3    8.10    7.43
   1  -8  -3    2.38    7.94
  -7  -1  -3    2.73   11.50
  -8   7  -3   20.80    7.66
   1  -8  -3    1.12    5.72
  -1   8  -3   10.27   10.96
   1  -8   3    4.69    3.26
   8  -1  -3    1.44    8.08
   8  -7   3    4.18    6.87
   8  -1  -3   11.42   11.89
  -1  -7  -3   20.46    8.97
   8  -1  -3   -3.85    6.64
   7   1   3    4.27    8.21
   1  -8   3    7.15    3.53
   1   7  -3    9.41    8.13
  -7  -1   3    5.62   11.09
   7  -8  -3   13.42    8.19
   8  -1  -3    0.31    9.71
  -1  -7  -3   10.41    7.57
   1  -8   3    7.29    7.43
   7  -8  -3   10.05   10.45
   1  -8   3    6.57    6.80
   1  -8   3   21.86    9.83
  -8   1  -3   20.34   10.76
   1  -8   3   11.43    6.85
   7   1   3   18.32    8.86
  -1  -7  -3    2.33    6.41
  -1   8   3   10.78    7.14
  -7  -1   3    0.33    7.26
   8  -7   3  -12.13   10.49
  -1  -7  -3    3.33    8.66
  -7   8  -3    3.18    4.20
  -1  -7  -3    6.52   11.20
   8  -1  -3   13.77   12.01
   1   7  -3   22.20   11.15
  -7   8  -3   12.42    5.30
  -7   8  -3   17.51   11.00
   1  -8   3    9.35   12.91
  -7  -1   3    0.01    7.58
  -8   1  -3    5.24    7.99
   7  -8  -3   13.88    5.20
   8  -7   3    2.65   13.46
   1   7  -3    8.45    6.70
   1  -8   3   -7.23    8.51
   7  -8  -3    9.15    6.49
  -8   1  -3    4.62    7.19
   8  -7   3   14.35    9.10
  -8   7   3    1.09    8.27
  -8   1  -3    5.94   10.33
   8  -7   3    4.74    6.21
  -7  -1   3    8.19    8.01
  -7  -1   3   -3.71   10.83
   7  -8  -3   14.69    5.16
   1   7  -3   19.29    6.08
  -7   8  -3   21.54   10.16
   7   1   3   14.76   12.02
   8  -1  -3   -0.62    7.17
   7   1   3   19.91    8.70
   7   1   3   19.35   11.68
   7   1   3    7.75    6.76
   7  -8  -3   22.56   12.75
  -8   0   3   -3.63    6.98
  -8   0  -3   16.73   11.20
   8   0  -3    5.80    8.87
   8   0  -3    2.13    6.72
   8  -8  -3    7.10   10.47
   0   8   3    5.55    7.34
   0  -8  -3    0.32    6.88
   8   0   3    2.98    7.18
   8   0  -3  -13.91    7.86
  -8   0   3   -2.00    6.77
   8  -8   3    9.82   11.27
   0   8  -3    8.07    6.34
   8   0   3   10.42   10.86
   8  -8   3   -9.33   12.05
   8   0   3    8.29    8.54
   0  -8   3    5.84    7.16
   8   0  -3    9.46   11.78
   8  -8  -3    2.05    6.49
   8  -8  -3    2.82    5.74
   0  -8  -3   -4.55   10.49
   8  -8   3    1.59    8.68
   0   8  -3   -1.92   10.04
  -8   8  -3    5.67    9.52
   8   0   3   21.41    8.60
   0  -8   3    6.07    6.81
   8  -8   3    2.99    5.57
  -8   8  -3    8.05   11.41
  -8   0  -3  -17.87   10.45
   0   8  -3    1.82    7.17
   0  -8   3   10.05    7.39
   8  -8  -3  -20.00   13.13
  -8   0   3    1.27   10.82
  -8   0  -3   -1.19    6.79
  -8   0   3   -8.17   11.59
   8  -8  -3    3.88    7.97
   0  -8  -3    5.67    8.58
   0  -8   3    4.11   13.10
   8  -8  -3    6.61    5.63
   0  -8  -3   -8.29    7.58
  -8   0  -3   -6.48    7.38
  -8   0  -3    4.15    9.85
  -8   0  -3    5.29    7.05
   8   0   3   19.73   13.50
   0  -8  -3   -1.03    6.79
   8   0   3   -7.06    8.18
   0  -8  -3   -1.76    3.07
   8   0  -3   31.41   13.64
   8  -8   3    6.27    6.92
  -8   0   3   11.81    7.49
   0   8  -3   -1.12    4.82
   8   0  -3   12.30    7.85
  -8   8   3    2.23    8.59
  -8   8  -3    2.88    5.87
   0  -8   3   -2.02    9.29
   9  -4   3  260.10   21.99
  -9   5  -3  274.10   18.11
  -9   5  -3  271.30   20.23
   9  -5  -3  286.30   27.39
   4  -9  -3  254.83   12.23
   9  -5  -3  265.02   20.44
[truncated: 2,082,455 more chars]
