# Supplementary material for: (Ca, Eu, Yb)<sub>23</sub>Cu<sub>7</sub>Mg<sub>4</sub> as a Step towards the Structural Generalization of Rare Earth-Rich Intermetallics
Source: Preprints.org preprint supplement (doi:10.20944/preprints202401.0440.v1), 2024-01-05
Supplement: Supplementary file 1 [file supplementary › CIF files/PS_37_CCM_a8_Ca23Cu7Mg4_0m_a.cif]

 
data_PS_37_CCM_a8_Ca23Cu7Mg4_0m_a
 
_audit_creation_method            'SHELXL-2019/1'
_shelx_SHELXL_version_number      '2019/1'
_chemical_name_systematic         ?
_chemical_name_common             ?
_chemical_melting_point           ?
_chemical_formula_moiety         'Ca23 Cu7 Mg4'
_chemical_formula_sum            'Ca23 Cu7 Mg4' 
_chemical_formula_weight          1463.86

loop_
 _atom_type_symbol
 _atom_type_description
 _atom_type_scat_dispersion_real
 _atom_type_scat_dispersion_imag
 _atom_type_scat_source
 'Ca'  'Ca'   0.2262   0.3064
 'International Tables Vol C Tables 4.2.6.8 and 6.1.1.4'
 'Cu'  'Cu'   0.3201   1.2651
 'International Tables Vol C Tables 4.2.6.8 and 6.1.1.4'
 'Mg'  'Mg'   0.0486   0.0363
 'International Tables Vol C Tables 4.2.6.8 and 6.1.1.4'
 
_space_group_crystal_system       hexagonal
_space_group_IT_number            194
_space_group_name_H-M_alt         'P 63/m m c'
_space_group_name_Hall            '-P 6c 2c'
 
_shelx_space_group_comment
;
The symmetry employed for this shelxl refinement is uniquely defined
by the following loop, which should always be used as a source of
symmetry information in preference to the above space-group names.
They are only intended as comments.
;
 
loop_
 _space_group_symop_operation_xyz
 'x, y, z'
 '-y, x-y, z'
 '-x+y, -x, z'
 '-x, -y, z+1/2'
 'y, -x+y, z+1/2'
 'x-y, x, z+1/2'
 'y, x, -z'
 'x-y, -y, -z'
 '-x, -x+y, -z'
 '-y, -x, -z+1/2'
 '-x+y, y, -z+1/2'
 'x, x-y, -z+1/2'
 '-x, -y, -z'
 'y, -x+y, -z'
 'x-y, x, -z'
 'x, y, -z-1/2'
 '-y, x-y, -z-1/2'
 '-x+y, -x, -z-1/2'
 '-y, -x, z'
 '-x+y, y, z'
 'x, x-y, z'
 'y, x, z-1/2'
 'x-y, -y, z-1/2'
 '-x, -x+y, z-1/2'
 
_cell_length_a                    10.236(2)
_cell_length_b                    10.236(2)
_cell_length_c                    23.413(5)
_cell_angle_alpha                 90.00(3)
_cell_angle_beta                  90.00(3)
_cell_angle_gamma                 120.00(3)
_cell_volume                      2124.4(9)
_cell_formula_units_Z             2
_cell_measurement_temperature     293(2)
_cell_measurement_reflns_used     1060
_cell_measurement_theta_min       2.298
_cell_measurement_theta_max       33.223
 
_exptl_crystal_description        'irregularly shaped'
_exptl_crystal_colour             'grey'
_exptl_crystal_density_method     'not measured'
_exptl_crystal_density_diffrn     2.288          
_exptl_crystal_F_000              1422
_exptl_transmission_factor_min    0.6611
_exptl_transmission_factor_max    0.7465
_exptl_crystal_size_max           0.040
_exptl_crystal_size_mid           0.030
_exptl_crystal_size_min           0.020
_exptl_absorpt_coefficient_mu     6.269
_shelx_estimated_absorpt_T_min    0.7880
_shelx_estimated_absorpt_T_max    0.8340

_exptl_absorpt_correction_type    'multi-scan' 
_exptl_absorpt_process_details    'Bruker SADABS'
_diffrn_ambient_temperature       293(2)
_diffrn_radiation_wavelength      0.71073
_diffrn_radiation_type            MoK\a
_diffrn_radiation_source          'fine-focus sealed tube' 
_diffrn_radiation_monochromator   graphite 
_diffrn_measurement_device_type   'PHOTON III'
_diffrn_measurement_method        'one \w scan and one \f scan'

_diffrn_detector_area_resol_mean  ?
_diffrn_reflns_number             39998
_diffrn_reflns_av_unetI/netI      0.0447
_diffrn_reflns_av_R_equivalents   0.1014
_diffrn_reflns_limit_h_min        -15
_diffrn_reflns_limit_h_max        11
_diffrn_reflns_limit_k_min        -15
_diffrn_reflns_limit_k_max        14
_diffrn_reflns_limit_l_min        -36
_diffrn_reflns_limit_l_max        35
_diffrn_reflns_theta_min          2.298
_diffrn_reflns_theta_max          33.223
_diffrn_reflns_theta_full         25.243
_diffrn_measured_fraction_theta_max   0.998
_diffrn_measured_fraction_theta_full  0.999
_diffrn_reflns_Laue_measured_fraction_max    0.998
_diffrn_reflns_Laue_measured_fraction_full   0.999
_diffrn_reflns_point_group_measured_fraction_max   0.998
_diffrn_reflns_point_group_measured_fraction_full  0.999
_reflns_number_total              1592
_reflns_number_gt                 1060
_reflns_threshold_expression      'I > 2\s(I)'
_reflns_Friedel_coverage          0.000
_reflns_Friedel_fraction_max      .
_reflns_Friedel_fraction_full     .
 
_reflns_special_details
;
 Reflections were merged by SHELXL according to the crystal
 class for the calculation of statistics and refinement.
 
 _reflns_Friedel_fraction is defined as the number of unique
 Friedel pairs measured divided by the number that would be
 possible theoretically, ignoring centric projections and
 systematic absences.
;
 
_computing_data_collection        ?
_computing_cell_refinement        ?
_computing_data_reduction         ?
_computing_structure_solution     ?
_computing_structure_refinement 'SHELXL-2019/1 (Sheldrick, 2019)'
_computing_molecular_graphics     ?
_computing_publication_material   ?
_refine_special_details           ?
_refine_ls_structure_factor_coef  Fsqd
_refine_ls_matrix_type            full
_refine_ls_weighting_scheme       calc
_refine_ls_weighting_details
'w=1/[\s^2^(Fo^2^)+(0.0652P)^2^] where P=(Fo^2^+2Fc^2^)/3'
_atom_sites_solution_primary      ?
_atom_sites_solution_secondary    ?
_atom_sites_solution_hydrogens    .
_refine_ls_hydrogen_treatment     undef
_refine_ls_extinction_method      none
_refine_ls_extinction_coef        .
_refine_ls_number_reflns          1592
_refine_ls_number_parameters      41
_refine_ls_number_restraints      0
_refine_ls_R_factor_all           0.0864
_refine_ls_R_factor_gt            0.0403
_refine_ls_wR_factor_ref          0.1320
_refine_ls_wR_factor_gt           0.0932
_refine_ls_goodness_of_fit_ref    1.156
_refine_ls_restrained_S_all       1.156
_refine_ls_shift/su_max           0.000
_refine_ls_shift/su_mean          0.000
 
loop_
 _atom_site_label
 _atom_site_type_symbol
 _atom_site_fract_x
 _atom_site_fract_y
 _atom_site_fract_z
 _atom_site_U_iso_or_equiv
 _atom_site_adp_type
 _atom_site_occupancy
 _atom_site_site_symmetry_order  
 _atom_site_calc_flag
 _atom_site_refinement_flags_posn
 _atom_site_refinement_flags_adp
 _atom_site_refinement_flags_occupancy
 _atom_site_disorder_assembly
 _atom_site_disorder_group
Ca1 Ca 0.333333 0.666667 0.11757(8) 0.0180(4) Uani 1 6 d S T P . .
Ca2 Ca 0.41302(12) 0.20651(6) 0.03215(5) 0.0209(2) Uani 1 2 d S T P . .
Ca3 Ca 0.87836(9) 1.12164(9) 0.250000 0.0211(3) Uani 1 4 d S T P . .
Ca4 Ca 0.75222(12) 0.87611(6) 0.38123(5) 0.0219(2) Uani 1 2 d S T P . .
Ca5 Ca 0.53951(6) 0.46049(6) 0.16824(5) 0.0217(2) Uani 1 2 d S T P . .
Cu1 Cu 0.47445(4) 0.52555(4) 0.04959(3) 0.0243(2) Uani 1 2 d S T P . .
Cu2 Cu 0.666667 0.333333 0.250000 0.0277(4) Uani 1 12 d S T P . .
Mg1 Mg 1.000000 1.000000 0.500000 0.0234(17) Uani 0.93(4) 12 d S T P . .
Ca01 Ca 1.000000 1.000000 0.500000 0.0234(17) Uani 0.07(4) 12 d S T P . .
Mg2 Mg 0.5412(3) 0.77058(14) 0.250000 0.0190(5) Uani 1 4 d S T P . .
 
loop_
 _atom_site_aniso_label
 _atom_site_aniso_U_11
 _atom_site_aniso_U_22
 _atom_site_aniso_U_33
 _atom_site_aniso_U_23
 _atom_site_aniso_U_13
 _atom_site_aniso_U_12
Ca1 0.0162(5) 0.0162(5) 0.0214(8) 0.000 0.000 0.0081(2)
Ca2 0.0212(5) 0.0177(4) 0.0250(5) -0.0003(2) -0.0006(4) 0.0106(3)
Ca3 0.0185(5) 0.0185(5) 0.0233(7) 0.000 0.000 0.0069(6)
Ca4 0.0219(5) 0.0221(4) 0.0215(5) -0.0020(2) -0.0041(4) 0.0109(3)
Ca5 0.0240(4) 0.0240(4) 0.0197(5) 0.0007(2) -0.0007(2) 0.0139(4)
Cu1 0.0314(3) 0.0314(3) 0.0187(3) -0.00034(12) 0.00034(12) 0.0221(3)
Cu2 0.0312(6) 0.0312(6) 0.0206(8) 0.000 0.000 0.0156(3)
Mg1 0.0240(19) 0.0240(19) 0.022(2) 0.000 0.000 0.0120(10)
Ca01 0.0240(19) 0.0240(19) 0.022(2) 0.000 0.000 0.0120(10)
Mg2 0.0150(11) 0.0195(9) 0.0211(11) 0.000 0.000 0.0075(6)
 
_geom_special_details
;
 All esds (except the esd in the dihedral angle between two l.s. planes)
 are estimated using the full covariance matrix.  The cell esds are taken
 into account individually in the estimation of esds in distances, angles
 and torsion angles; correlations between esds in cell parameters are only
 used when they are defined by crystal symmetry.  An approximate (isotropic)
 treatment of cell esds is used for estimating esds involving l.s. planes.
;
 
loop_
 _geom_bond_atom_site_label_1
 _geom_bond_atom_site_label_2
 _geom_bond_distance
 _geom_bond_site_symmetry_2
 _geom_bond_publ_flag
Ca1 Cu1 2.9651(12) 3_565 ?
Ca1 Cu1 2.9651(12) 2_665 ?
Ca1 Cu1 2.9651(12) . ?
Ca1 Mg2 3.607(2) . ?
Ca1 Mg2 3.607(2) 2_665 ?
Ca1 Mg2 3.607(2) 3_565 ?
Ca1 Ca4 3.7133(13) 18_566 ?
Ca1 Ca4 3.7133(13) 16_556 ?
Ca1 Ca4 3.7134(13) 17_666 ?
Ca1 Ca5 3.8430(14) 2_665 ?
Ca1 Ca5 3.8430(14) 3_565 ?
Ca1 Ca5 3.8430(14) . ?
Ca2 Cu1 3.0287(8) . ?
Ca2 Cu1 3.0287(8) 2_655 ?
Ca2 Cu1 3.0582(10) 14 ?
Ca2 Cu1 3.0582(10) 13_665 ?
Ca2 Mg1 3.7378(13) 4_664 ?
Ca2 Ca4 3.7816(12) 17_656 ?
Ca2 Ca4 3.7816(12) 18_566 ?
Ca2 Ca4 3.8252(17) 4_664 ?
Ca2 Ca2 3.894(2) 3_665 ?
Ca2 Ca2 3.894(2) 2_655 ?
Ca2 Ca5 3.9015(15) 2_655 ?
Ca2 Ca5 3.9015(15) . ?
Ca3 Mg2 3.525(2) 3_675 ?
Ca3 Mg2 3.525(2) . ?
Ca3 Ca3 3.735(3) 3_675 ?
Ca3 Ca3 3.735(3) 2_765 ?
Ca3 Ca4 3.7653(12) 16_556 ?
Ca3 Ca4 3.7653(12) 3_675 ?
Ca3 Ca4 3.7653(12) 18_676 ?
Ca3 Ca4 3.7653(12) . ?
Ca3 Ca5 3.7910(13) 2_665 ?
Ca3 Ca5 3.7910(13) 18_676 ?
Ca3 Ca5 3.7910(13) 3_675 ?
Ca3 Ca5 3.7910(13) 17_666 ?
Ca4 Ca01 3.5436(12) . ?
Ca4 Mg1 3.5436(12) . ?
Ca4 Mg2 3.5972(17) . ?
Ca4 Cu1 3.6580(11) 16_556 ?
Ca4 Cu1 3.6580(11) 17_666 ?
Ca4 Ca4 3.804(2) 2_765 ?
Ca4 Ca4 3.804(2) 3_675 ?
Ca5 Cu2 2.9574(11) . ?
Ca5 Cu1 3.0079(14) . ?
Ca5 Mg2 3.6993(11) 3_565 ?
Ca5 Mg2 3.6993(11) . ?
Ca5 Ca5 3.828(2) 16_556 ?
Cu1 Cu1 2.4927(14) 13_665 ?
Mg2 Mg2 3.191(4) 2_665 ?
Mg2 Mg2 3.191(4) 3_565 ?
 
loop_
 _geom_angle_atom_site_label_1
 _geom_angle_atom_site_label_2
 _geom_angle_atom_site_label_3
 _geom_angle
 _geom_angle_site_symmetry_1
 _geom_angle_site_symmetry_3
 _geom_angle_publ_flag
Cu1 Ca1 Cu1 93.89(4) 3_565 2_665 ?
Cu1 Ca1 Cu1 93.89(4) 3_565 . ?
Cu1 Ca1 Cu1 93.89(4) 2_665 . ?
Cu1 Ca1 Mg2 153.18(6) 3_565 . ?
Cu1 Ca1 Mg2 104.24(3) 2_665 . ?
Cu1 Ca1 Mg2 104.24(3) . . ?
Cu1 Ca1 Mg2 104.24(3) 3_565 2_665 ?
Cu1 Ca1 Mg2 104.24(3) 2_665 2_665 ?
Cu1 Ca1 Mg2 153.18(6) . 2_665 ?
Mg2 Ca1 Mg2 52.51(6) . 2_665 ?
Cu1 Ca1 Mg2 104.24(3) 3_565 3_565 ?
Cu1 Ca1 Mg2 153.18(6) 2_665 3_565 ?
Cu1 Ca1 Mg2 104.24(3) . 3_565 ?
Mg2 Ca1 Mg2 52.51(6) . 3_565 ?
Mg2 Ca1 Mg2 52.51(6) 2_665 3_565 ?
Cu1 Ca1 Ca4 65.305(13) 3_565 18_566 ?
Cu1 Ca1 Ca4 147.98(6) 2_665 18_566 ?
Cu1 Ca1 Ca4 65.306(13) . 18_566 ?
Mg2 Ca1 Ca4 104.41(4) . 18_566 ?
Mg2 Ca1 Ca4 104.41(4) 2_665 18_566 ?
Mg2 Ca1 Ca4 58.85(4) 3_565 18_566 ?
Cu1 Ca1 Ca4 147.98(6) 3_565 16_556 ?
Cu1 Ca1 Ca4 65.305(13) 2_665 16_556 ?
Cu1 Ca1 Ca4 65.306(13) . 16_556 ?
Mg2 Ca1 Ca4 58.85(4) . 16_556 ?
Mg2 Ca1 Ca4 104.41(4) 2_665 16_556 ?
Mg2 Ca1 Ca4 104.41(4) 3_565 16_556 ?
Ca4 Ca1 Ca4 119.995(1) 18_566 16_556 ?
Cu1 Ca1 Ca4 65.306(13) 3_565 17_666 ?
Cu1 Ca1 Ca4 65.306(13) 2_665 17_666 ?
Cu1 Ca1 Ca4 147.98(6) . 17_666 ?
Mg2 Ca1 Ca4 104.41(4) . 17_666 ?
Mg2 Ca1 Ca4 58.85(4) 2_665 17_666 ?
Mg2 Ca1 Ca4 104.41(4) 3_565 17_666 ?
Ca4 Ca1 Ca4 119.994(1) 18_566 17_666 ?
Ca4 Ca1 Ca4 119.994(1) 16_556 17_666 ?
Cu1 Ca1 Ca5 124.540(14) 3_565 2_665 ?
Cu1 Ca1 Ca5 50.45(2) 2_665 2_665 ?
Cu1 Ca1 Ca5 124.540(14) . 2_665 ?
Mg2 Ca1 Ca5 59.45(2) . 2_665 ?
Mg2 Ca1 Ca5 59.45(2) 2_665 2_665 ?
Mg2 Ca1 Ca5 102.73(6) 3_565 2_665 ?
Ca4 Ca1 Ca5 161.58(6) 18_566 2_665 ?
Ca4 Ca1 Ca5 61.450(8) 16_556 2_665 ?
Ca4 Ca1 Ca5 61.451(8) 17_666 2_665 ?
Cu1 Ca1 Ca5 50.45(2) 3_565 3_565 ?
Cu1 Ca1 Ca5 124.540(14) 2_665 3_565 ?
Cu1 Ca1 Ca5 124.540(14) . 3_565 ?
Mg2 Ca1 Ca5 102.73(6) . 3_565 ?
Mg2 Ca1 Ca5 59.45(2) 2_665 3_565 ?
Mg2 Ca1 Ca5 59.45(2) 3_565 3_565 ?
Ca4 Ca1 Ca5 61.450(8) 18_566 3_565 ?
Ca4 Ca1 Ca5 161.58(6) 16_556 3_565 ?
Ca4 Ca1 Ca5 61.451(8) 17_666 3_565 ?
Ca5 Ca1 Ca5 110.92(3) 2_665 3_565 ?
Cu1 Ca1 Ca5 124.540(14) 3_565 . ?
Cu1 Ca1 Ca5 124.540(14) 2_665 . ?
Cu1 Ca1 Ca5 50.45(2) . . ?
Mg2 Ca1 Ca5 59.45(2) . . ?
Mg2 Ca1 Ca5 102.73(6) 2_665 . ?
Mg2 Ca1 Ca5 59.45(2) 3_565 . ?
Ca4 Ca1 Ca5 61.452(8) 18_566 . ?
Ca4 Ca1 Ca5 61.452(8) 16_556 . ?
Ca4 Ca1 Ca5 161.58(6) 17_666 . ?
Ca5 Ca1 Ca5 110.92(3) 2_665 . ?
Ca5 Ca1 Ca5 110.92(3) 3_565 . ?
Cu1 Ca2 Cu1 154.03(4) . 2_655 ?
Cu1 Ca2 Cu1 135.73(4) . 14 ?
Cu1 Ca2 Cu1 48.35(3) 2_655 14 ?
Cu1 Ca2 Cu1 48.35(3) . 13_665 ?
Cu1 Ca2 Cu1 135.73(4) 2_655 13_665 ?
Cu1 Ca2 Cu1 90.22(4) 14 13_665 ?
Cu1 Ca2 Mg1 101.73(2) . 4_664 ?
Cu1 Ca2 Mg1 101.73(2) 2_655 4_664 ?
Cu1 Ca2 Mg1 101.15(3) 14 4_664 ?
Cu1 Ca2 Mg1 101.15(3) 13_665 4_664 ?
Cu1 Ca2 Ca4 122.66(4) . 17_656 ?
Cu1 Ca2 Ca4 63.86(2) 2_655 17_656 ?
Cu1 Ca2 Ca4 101.56(2) 14 17_656 ?
Cu1 Ca2 Ca4 155.93(4) 13_665 17_656 ?
Mg1 Ca2 Ca4 56.23(2) 4_664 17_656 ?
Cu1 Ca2 Ca4 63.86(2) . 18_566 ?
Cu1 Ca2 Ca4 122.66(4) 2_655 18_566 ?
Cu1 Ca2 Ca4 155.93(4) 14 18_566 ?
Cu1 Ca2 Ca4 101.56(2) 13_665 18_566 ?
Mg1 Ca2 Ca4 56.23(2) 4_664 18_566 ?
Ca4 Ca2 Ca4 60.40(4) 17_656 18_566 ?
Cu1 Ca2 Ca4 101.15(2) . 4_664 ?
Cu1 Ca2 Ca4 101.15(2) 2_655 4_664 ?
Cu1 Ca2 Ca4 63.05(3) 14 4_664 ?
Cu1 Ca2 Ca4 63.05(3) 13_665 4_664 ?
Mg1 Ca2 Ca4 55.87(2) 4_664 4_664 ?
Ca4 Ca2 Ca4 103.64(4) 17_656 4_664 ?
Ca4 Ca2 Ca4 103.64(4) 18_566 4_664 ?
Cu1 Ca2 Ca2 49.99(2) . 3_665 ?
Cu1 Ca2 Ca2 109.36(2) 2_655 3_665 ?
Cu1 Ca2 Ca2 94.11(2) 14 3_665 ?
Cu1 Ca2 Ca2 50.45(2) 13_665 3_665 ?
Mg1 Ca2 Ca2 148.025(6) 4_664 3_665 ?
Ca4 Ca2 Ca2 146.98(2) 17_656 3_665 ?
Ca4 Ca2 Ca2 109.601(19) 18_566 3_665 ?
Ca4 Ca2 Ca2 109.37(2) 4_664 3_665 ?
Cu1 Ca2 Ca2 109.36(2) . 2_655 ?
Cu1 Ca2 Ca2 49.99(2) 2_655 2_655 ?
Cu1 Ca2 Ca2 50.45(2) 14 2_655 ?
Cu1 Ca2 Ca2 94.11(2) 13_665 2_655 ?
Mg1 Ca2 Ca2 148.025(6) 4_664 2_655 ?
Ca4 Ca2 Ca2 109.602(19) 17_656 2_655 ?
Ca4 Ca2 Ca2 146.98(2) 18_566 2_655 ?
Ca4 Ca2 Ca2 109.37(2) 4_664 2_655 ?
Ca2 Ca2 Ca2 60.0 3_665 2_655 ?
Cu1 Ca2 Ca5 109.02(4) . 2_655 ?
Cu1 Ca2 Ca5 49.50(2) 2_655 2_655 ?
Cu1 Ca2 Ca5 93.60(3) 14 2_655 ?
Cu1 Ca2 Ca5 140.53(4) 13_665 2_655 ?
Mg1 Ca2 Ca5 116.49(3) 4_664 2_655 ?
Ca4 Ca2 Ca5 60.33(2) 17_656 2_655 ?
Ca4 Ca2 Ca5 90.49(3) 18_566 2_655 ?
Ca4 Ca2 Ca5 149.824(18) 4_664 2_655 ?
Ca2 Ca2 Ca5 90.077(18) 3_665 2_655 ?
Ca2 Ca2 Ca5 60.061(18) 2_655 2_655 ?
Cu1 Ca2 Ca5 49.50(2) . . ?
Cu1 Ca2 Ca5 109.02(4) 2_655 . ?
Cu1 Ca2 Ca5 140.53(4) 14 . ?
Cu1 Ca2 Ca5 93.60(3) 13_665 . ?
Mg1 Ca2 Ca5 116.49(3) 4_664 . ?
Ca4 Ca2 Ca5 90.49(3) 17_656 . ?
Ca4 Ca2 Ca5 60.33(2) 18_566 . ?
Ca4 Ca2 Ca5 149.825(18) 4_664 . ?
Ca2 Ca2 Ca5 60.061(18) 3_665 . ?
Ca2 Ca2 Ca5 90.077(18) 2_655 . ?
Ca5 Ca2 Ca5 60.06(4) 2_655 . ?
Mg2 Ca3 Mg2 176.01(7) 3_675 . ?
Mg2 Ca3 Ca3 58.00(3) 3_675 3_675 ?
Mg2 Ca3 Ca3 118.00(3) . 3_675 ?
Mg2 Ca3 Ca3 118.00(3) 3_675 2_765 ?
Mg2 Ca3 Ca3 58.00(3) . 2_765 ?
Ca3 Ca3 Ca3 60.0 3_675 2_765 ?
Mg2 Ca3 Ca4 119.67(2) 3_675 16_556 ?
Mg2 Ca3 Ca4 59.025(18) . 16_556 ?
Ca3 Ca3 Ca4 90.53(2) 3_675 16_556 ?
Ca3 Ca3 Ca4 60.27(2) 2_765 16_556 ?
Mg2 Ca3 Ca4 59.025(18) 3_675 3_675 ?
Mg2 Ca3 Ca4 119.67(2) . 3_675 ?
Ca3 Ca3 Ca4 60.27(2) 3_675 3_675 ?
Ca3 Ca3 Ca4 90.53(2) 2_765 3_675 ?
Ca4 Ca3 Ca4 147.36(5) 16_556 3_675 ?
Mg2 Ca3 Ca4 59.025(18) 3_675 18_676 ?
Mg2 Ca3 Ca4 119.67(2) . 18_676 ?
Ca3 Ca3 Ca4 60.27(2) 3_675 18_676 ?
Ca3 Ca3 Ca4 90.53(2) 2_765 18_676 ?
Ca4 Ca3 Ca4 60.69(3) 16_556 18_676 ?
Ca4 Ca3 Ca4 109.37(3) 3_675 18_676 ?
Mg2 Ca3 Ca4 119.67(2) 3_675 . ?
Mg2 Ca3 Ca4 59.025(18) . . ?
Ca3 Ca3 Ca4 90.53(2) 3_675 . ?
Ca3 Ca3 Ca4 60.27(2) 2_765 . ?
Ca4 Ca3 Ca4 109.37(3) 16_556 . ?
Ca4 Ca3 Ca4 60.69(3) 3_675 . ?
Ca4 Ca3 Ca4 147.35(5) 18_676 . ?
Mg2 Ca3 Ca5 122.60(4) 3_675 2_665 ?
Mg2 Ca3 Ca5 60.62(3) . 2_665 ?
Ca3 Ca3 Ca5 149.02(2) 3_675 2_665 ?
Ca3 Ca3 Ca5 110.02(2) 2_765 2_665 ?
Ca4 Ca3 Ca5 61.48(2) 16_556 2_665 ?
Ca4 Ca3 Ca5 150.09(4) 3_675 2_665 ?
Ca4 Ca3 Ca5 92.46(2) 18_676 2_665 ?
Ca4 Ca3 Ca5 110.27(3) . 2_665 ?
Mg2 Ca3 Ca5 60.62(3) 3_675 18_676 ?
Mg2 Ca3 Ca5 122.60(4) . 18_676 ?
Ca3 Ca3 Ca5 110.02(2) 3_675 18_676 ?
Ca3 Ca3 Ca5 149.02(2) 2_765 18_676 ?
Ca4 Ca3 Ca5 150.09(4) 16_556 18_676 ?
Ca4 Ca3 Ca5 61.48(2) 3_675 18_676 ?
Ca4 Ca3 Ca5 110.27(3) 18_676 18_676 ?
Ca4 Ca3 Ca5 92.46(2) . 18_676 ?
Ca5 Ca3 Ca5 92.31(5) 2_665 18_676 ?
Mg2 Ca3 Ca5 60.62(3) 3_675 3_675 ?
Mg2 Ca3 Ca5 122.60(4) . 3_675 ?
Ca3 Ca3 Ca5 110.02(2) 3_675 3_675 ?
Ca3 Ca3 Ca5 149.02(2) 2_765 3_675 ?
Ca4 Ca3 Ca5 92.46(2) 16_556 3_675 ?
Ca4 Ca3 Ca5 110.27(3) 3_675 3_675 ?
Ca4 Ca3 Ca5 61.48(2) 18_676 3_675 ?
Ca4 Ca3 Ca5 150.10(4) . 3_675 ?
Ca5 Ca3 Ca5 62.00(4) 2_665 3_675 ?
Ca5 Ca3 Ca5 60.65(4) 18_676 3_675 ?
Mg2 Ca3 Ca5 122.60(4) 3_675 17_666 ?
Mg2 Ca3 Ca5 60.62(3) . 17_666 ?
Ca3 Ca3 Ca5 149.02(2) 3_675 17_666 ?
Ca3 Ca3 Ca5 110.02(2) 2_765 17_666 ?
Ca4 Ca3 Ca5 110.27(3) 16_556 17_666 ?
Ca4 Ca3 Ca5 92.46(2) 3_675 17_666 ?
Ca4 Ca3 Ca5 150.09(4) 18_676 17_666 ?
Ca4 Ca3 Ca5 61.48(2) . 17_666 ?
Ca5 Ca3 Ca5 60.65(4) 2_665 17_666 ?
Ca5 Ca3 Ca5 62.00(4) 18_676 17_666 ?
Ca5 Ca3 Ca5 92.31(5) 3_675 17_666 ?
Ca01 Ca4 Mg1 0.0 . . ?
Ca01 Ca4 Mg2 173.04(5) . . ?
Mg1 Ca4 Mg2 173.04(5) . . ?
Ca01 Ca4 Cu1 94.00(3) . 16_556 ?
Mg1 Ca4 Cu1 94.00(3) . 16_556 ?
Mg2 Ca4 Cu1 91.61(4) . 16_556 ?
Ca01 Ca4 Cu1 94.00(3) . 17_666 ?
Mg1 Ca4 Cu1 94.00(3) . 17_666 ?
Mg2 Ca4 Cu1 91.61(4) . 17_666 ?
Cu1 Ca4 Cu1 72.64(3) 16_556 17_666 ?
Ca01 Ca4 Ca1 127.87(4) . 16_556 ?
Mg1 Ca4 Ca1 127.87(4) . 16_556 ?
Mg2 Ca4 Ca1 59.10(5) . 16_556 ?
Cu1 Ca4 Ca1 47.43(2) 16_556 16_556 ?
Cu1 Ca4 Ca1 47.43(2) 17_666 16_556 ?
Ca01 Ca4 Ca3 117.15(3) . . ?
Mg1 Ca4 Ca3 117.15(3) . . ?
Mg2 Ca4 Ca3 57.15(3) . . ?
Cu1 Ca4 Ca3 148.76(3) 16_556 . ?
Cu1 Ca4 Ca3 105.51(3) 17_666 . ?
Ca1 Ca4 Ca3 107.65(4) 16_556 . ?
Ca01 Ca4 Ca3 117.15(3) . 2_765 ?
Mg1 Ca4 Ca3 117.15(3) . 2_765 ?
Mg2 Ca4 Ca3 57.15(3) . 2_765 ?
Cu1 Ca4 Ca3 105.51(3) 16_556 2_765 ?
Cu1 Ca4 Ca3 148.76(3) 17_666 2_765 ?
Ca1 Ca4 Ca3 107.65(4) 16_556 2_765 ?
Ca3 Ca4 Ca3 59.47(4) . 2_765 ?
Ca01 Ca4 Ca2 61.26(2) . 17_666 ?
Mg1 Ca4 Ca2 61.26(2) . 17_666 ?
Mg2 Ca4 Ca2 120.56(2) . 17_666 ?
Cu1 Ca4 Ca2 108.92(3) 16_556 17_666 ?
Cu1 Ca4 Ca2 48.011(16) 17_666 17_666 ?
Ca1 Ca4 Ca2 95.32(3) 16_556 17_666 ?
Ca3 Ca4 Ca2 89.60(3) . 17_666 ?
Ca3 Ca4 Ca2 145.56(4) 2_765 17_666 ?
Ca01 Ca4 Ca2 61.26(2) . 18_666 ?
Mg1 Ca4 Ca2 61.26(2) . 18_666 ?
Mg2 Ca4 Ca2 120.56(2) . 18_666 ?
Cu1 Ca4 Ca2 48.011(16) 16_556 18_666 ?
Cu1 Ca4 Ca2 108.92(3) 17_666 18_666 ?
Ca1 Ca4 Ca2 95.32(3) 16_556 18_666 ?
Ca3 Ca4 Ca2 145.56(4) . 18_666 ?
Ca3 Ca4 Ca2 89.60(3) 2_765 18_666 ?
Ca2 Ca4 Ca2 113.96(4) 17_666 18_666 ?
Ca01 Ca4 Ca4 57.535(15) . 2_765 ?
Mg1 Ca4 Ca4 57.535(15) . 2_765 ?
Mg2 Ca4 Ca4 116.77(3) . 2_765 ?
Cu1 Ca4 Ca4 106.667(15) 16_556 2_765 ?
Cu1 Ca4 Ca4 151.534(19) 17_666 2_765 ?
Ca1 Ca4 Ca4 150.0 16_556 2_765 ?
Ca3 Ca4 Ca4 89.47(2) . 2_765 ?
Ca3 Ca4 Ca4 59.657(17) 2_765 2_765 ?
Ca2 Ca4 Ca4 109.600(19) 17_666 2_765 ?
Ca2 Ca4 Ca4 59.802(19) 18_666 2_765 ?
Ca01 Ca4 Ca4 57.536(15) . 3_675 ?
Mg1 Ca4 Ca4 57.536(15) . 3_675 ?
Mg2 Ca4 Ca4 116.77(3) . 3_675 ?
Cu1 Ca4 Ca4 151.534(19) 16_556 3_675 ?
Cu1 Ca4 Ca4 106.666(15) 17_666 3_675 ?
Ca1 Ca4 Ca4 149.997(1) 16_556 3_675 ?
Ca3 Ca4 Ca4 59.657(17) . 3_675 ?
Ca3 Ca4 Ca4 89.47(2) 2_765 3_675 ?
Ca2 Ca4 Ca4 59.801(19) 17_666 3_675 ?
Ca2 Ca4 Ca4 109.601(19) 18_666 3_675 ?
Ca4 Ca4 Ca4 60.0 2_765 3_675 ?
Cu2 Ca5 Cu1 152.88(4) . . ?
Cu2 Ca5 Mg2 103.21(3) . 3_565 ?
Cu1 Ca5 Mg2 101.22(3) . 3_565 ?
Cu2 Ca5 Mg2 103.21(3) . . ?
Cu1 Ca5 Mg2 101.22(3) . . ?
Mg2 Ca5 Mg2 51.10(7) 3_565 . ?
Cu2 Ca5 Ca3 66.25(2) . 2_765 ?
Cu1 Ca5 Ca3 120.30(2) . 2_765 ?
Mg2 Ca5 Ca3 100.50(4) 3_565 2_765 ?
Mg2 Ca5 Ca3 56.12(4) . 2_765 ?
Cu2 Ca5 Ca3 66.25(2) . 3_565 ?
Cu1 Ca5 Ca3 120.30(2) . 3_565 ?
Mg2 Ca5 Ca3 56.12(4) 3_565 3_565 ?
Mg2 Ca5 Ca3 100.50(4) . 3_565 ?
Ca3 Ca5 Ca3 118.05(4) 2_765 3_565 ?
Cu2 Ca5 Ca5 49.67(2) . 16_556 ?
Cu1 Ca5 Ca5 157.45(2) . 16_556 ?
Mg2 Ca5 Ca5 58.839(17) 3_565 16_556 ?
Mg2 Ca5 Ca5 58.839(18) . 16_556 ?
Ca3 Ca5 Ca5 59.674(18) 2_765 16_556 ?
Ca3 Ca5 Ca5 59.674(18) 3_565 16_556 ?
Cu2 Ca5 Ca1 157.65(4) . . ?
Cu1 Ca5 Ca1 49.47(3) . . ?
Mg2 Ca5 Ca1 57.10(3) 3_565 . ?
Mg2 Ca5 Ca1 57.10(4) . . ?
Ca3 Ca5 Ca1 104.52(3) 2_765 . ?
Ca3 Ca5 Ca1 104.52(3) 3_565 . ?
Ca5 Ca5 Ca1 107.98(3) 16_556 . ?
Cu2 Ca5 Ca4 123.30(2) . 18_566 ?
Cu1 Ca5 Ca4 62.90(2) . 18_566 ?
Mg2 Ca5 Ca4 56.76(3) 3_565 18_566 ?
Mg2 Ca5 Ca4 99.79(4) . 18_566 ?
Ca3 Ca5 Ca4 155.74(3) 2_765 18_566 ?
Ca3 Ca5 Ca4 58.93(3) 3_565 18_566 ?
Ca5 Ca5 Ca4 107.45(2) 16_556 18_566 ?
Ca1 Ca5 Ca4 57.62(2) . 18_566 ?
Cu2 Ca5 Ca4 123.30(2) . 16_556 ?
Cu1 Ca5 Ca4 62.90(2) . 16_556 ?
Mg2 Ca5 Ca4 99.79(5) 3_565 16_556 ?
Mg2 Ca5 Ca4 56.76(3) . 16_556 ?
Ca3 Ca5 Ca4 58.93(3) 2_765 16_556 ?
Ca3 Ca5 Ca4 155.74(3) 3_565 16_556 ?
Ca5 Ca5 Ca4 107.45(2) 16_556 16_556 ?
Ca1 Ca5 Ca4 57.62(2) . 16_556 ?
Ca4 Ca5 Ca4 112.73(4) 18_566 16_556 ?
Cu2 Ca5 Ca2 107.92(3) . . ?
Cu1 Ca5 Ca2 49.97(2) . . ?
Mg2 Ca5 Ca2 114.93(3) 3_565 . ?
Mg2 Ca5 Ca2 148.42(4) . . ?
Ca3 Ca5 Ca2 144.23(3) 2_765 . ?
Ca3 Ca5 Ca2 87.45(2) 3_565 . ?
Ca5 Ca5 Ca2 144.756(18) 16_556 . ?
Ca1 Ca5 Ca2 91.34(3) . . ?
Ca4 Ca5 Ca2 58.30(2) 18_566 . ?
Ca4 Ca5 Ca2 107.79(3) 16_556 . ?
Cu2 Ca5 Ca2 107.93(3) . 3_665 ?
Cu1 Ca5 Ca2 49.97(2) . 3_665 ?
Mg2 Ca5 Ca2 148.42(4) 3_565 3_665 ?
Mg2 Ca5 Ca2 114.93(3) . 3_665 ?
Ca3 Ca5 Ca2 87.46(2) 2_765 3_665 ?
Ca3 Ca5 Ca2 144.23(3) 3_565 3_665 ?
Ca5 Ca5 Ca2 144.756(18) 16_556 3_665 ?
Ca1 Ca5 Ca2 91.34(3) . 3_665 ?
Ca4 Ca5 Ca2 107.79(3) 18_566 3_665 ?
Ca4 Ca5 Ca2 58.30(2) 16_556 3_665 ?
Ca2 Ca5 Ca2 59.88(4) . 3_665 ?
Cu1 Cu1 Ca1 143.77(5) 13_665 . ?
Cu1 Cu1 Ca5 136.14(5) 13_665 . ?
Ca1 Cu1 Ca5 80.09(4) . . ?
Cu1 Cu1 Ca2 66.44(3) 13_665 . ?
Ca1 Cu1 Ca2 135.12(3) . . ?
Ca5 Cu1 Ca2 80.53(3) . . ?
Cu1 Cu1 Ca2 66.44(3) 13_665 3_665 ?
Ca1 Cu1 Ca2 135.12(3) . 3_665 ?
Ca5 Cu1 Ca2 80.53(3) . 3_665 ?
Ca2 Cu1 Ca2 80.02(4) . 3_665 ?
Cu1 Cu1 Ca2 65.21(3) 13_665 15 ?
Ca1 Cu1 Ca2 87.47(3) . 15 ?
Ca5 Cu1 Ca2 138.65(2) . 15 ?
Ca2 Cu1 Ca2 81.14(4) . 15 ?
Ca2 Cu1 Ca2 131.65(3) 3_665 15 ?
Cu1 Cu1 Ca2 65.21(3) 13_665 13_665 ?
Ca1 Cu1 Ca2 87.47(3) . 13_665 ?
Ca5 Cu1 Ca2 138.65(2) . 13_665 ?
Ca2 Cu1 Ca2 131.65(3) . 13_665 ?
Ca2 Cu1 Ca2 81.14(4) 3_665 13_665 ?
Ca2 Cu1 Ca2 79.09(4) 15 13_665 ?
Cu1 Cu1 Ca4 118.466(19) 13_665 16_556 ?
Ca1 Cu1 Ca4 67.263(19) . 16_556 ?
Ca5 Cu1 Ca4 70.043(19) . 16_556 ?
Ca2 Cu1 Ca4 139.28(3) . 16_556 ?
Ca2 Cu1 Ca4 68.13(2) 3_665 16_556 ?
Ca2 Cu1 Ca4 139.23(3) 15 16_556 ?
Ca2 Cu1 Ca4 68.77(3) 13_665 16_556 ?
Cu1 Cu1 Ca4 118.466(19) 13_665 18_566 ?
Ca1 Cu1 Ca4 67.263(19) . 18_566 ?
Ca5 Cu1 Ca4 70.04(2) . 18_566 ?
Ca2 Cu1 Ca4 68.13(2) . 18_566 ?
Ca2 Cu1 Ca4 139.28(3) 3_665 18_566 ?
Ca2 Cu1 Ca4 68.77(3) 15 18_566 ?
Ca2 Cu1 Ca4 139.23(3) 13_665 18_566 ?
Ca4 Cu1 Ca4 123.07(4) 16_556 18_566 ?
Ca5 Cu2 Ca5 135.191(16) . 18_666 ?
Ca5 Cu2 Ca5 82.62(3) . 2_655 ?
Ca5 Cu2 Ca5 135.191(16) 18_666 2_655 ?
Ca5 Cu2 Ca5 82.62(3) . 3_665 ?
Ca5 Cu2 Ca5 80.67(4) 18_666 3_665 ?
Ca5 Cu2 Ca5 82.62(3) 2_655 3_665 ?
Ca5 Cu2 Ca5 135.191(16) . 17_656 ?
Ca5 Cu2 Ca5 82.62(3) 18_666 17_656 ?
Ca5 Cu2 Ca5 80.67(4) 2_655 17_656 ?
Ca5 Cu2 Ca5 135.191(16) 3_665 17_656 ?
Ca5 Cu2 Ca5 80.67(4) . 16_556 ?
Ca5 Cu2 Ca5 82.62(3) 18_666 16_556 ?
Ca5 Cu2 Ca5 135.191(15) 2_655 16_556 ?
Ca5 Cu2 Ca5 135.191(16) 3_665 16_556 ?
Ca5 Cu2 Ca5 82.62(3) 17_656 16_556 ?
Ca4 Mg1 Ca4 180.0 14_566 2_765 ?
Ca4 Mg1 Ca4 115.07(3) 14_566 . ?
Ca4 Mg1 Ca4 64.93(3) 2_765 . ?
Ca4 Mg1 Ca4 64.93(3) 14_566 13_776 ?
Ca4 Mg1 Ca4 115.07(3) 2_765 13_776 ?
Ca4 Mg1 Ca4 180.0 . 13_776 ?
Ca4 Mg1 Ca4 64.93(3) 14_566 15_656 ?
Ca4 Mg1 Ca4 115.07(3) 2_765 15_656 ?
Ca4 Mg1 Ca4 115.07(3) . 15_656 ?
Ca4 Mg1 Ca4 64.93(3) 13_776 15_656 ?
Ca4 Mg1 Ca4 115.07(3) 14_566 3_675 ?
Ca4 Mg1 Ca4 64.93(3) 2_765 3_675 ?
Ca4 Mg1 Ca4 64.93(3) . 3_675 ?
Ca4 Mg1 Ca4 115.07(3) 13_776 3_675 ?
Ca4 Mg1 Ca4 180.0 15_656 3_675 ?
Ca4 Mg1 Ca2 62.510(14) 14_566 6_665 ?
Ca4 Mg1 Ca2 117.490(15) 2_765 6_665 ?
Ca4 Mg1 Ca2 117.490(14) . 6_665 ?
Ca4 Mg1 Ca2 62.511(14) 13_776 6_665 ?
Ca4 Mg1 Ca2 116.69(3) 15_656 6_665 ?
Ca4 Mg1 Ca2 63.31(3) 3_675 6_665 ?
Ca4 Mg1 Ca2 117.490(14) 14_566 18_666 ?
Ca4 Mg1 Ca2 62.510(14) 2_765 18_666 ?
Ca4 Mg1 Ca2 62.510(14) . 18_666 ?
Ca4 Mg1 Ca2 117.490(14) 13_776 18_666 ?
Ca4 Mg1 Ca2 63.31(3) 15_656 18_666 ?
Ca4 Mg1 Ca2 116.69(3) 3_675 18_666 ?
Ca2 Mg1 Ca2 180.0 6_665 18_666 ?
Ca4 Mg1 Ca2 117.490(14) 14_566 16_666 ?
Ca4 Mg1 Ca2 62.510(14) 2_765 16_666 ?
Ca4 Mg1 Ca2 116.69(3) . 16_666 ?
Ca4 Mg1 Ca2 63.31(3) 13_776 16_666 ?
Ca4 Mg1 Ca2 117.489(14) 15_656 16_666 ?
Ca4 Mg1 Ca2 62.511(14) 3_675 16_666 ?
Ca2 Mg1 Ca2 63.949(11) 6_665 16_666 ?
Ca2 Mg1 Ca2 116.051(11) 18_666 16_666 ?
Ca4 Mg1 Ca2 62.510(14) 14_566 4_665 ?
Ca4 Mg1 Ca2 117.490(14) 2_765 4_665 ?
Ca4 Mg1 Ca2 63.31(3) . 4_665 ?
Ca4 Mg1 Ca2 116.69(3) 13_776 4_665 ?
Ca4 Mg1 Ca2 62.511(14) 15_656 4_665 ?
Ca4 Mg1 Ca2 117.489(14) 3_675 4_665 ?
Ca2 Mg1 Ca2 116.051(11) 6_665 4_665 ?
Ca2 Mg1 Ca2 63.949(12) 18_666 4_665 ?
Ca2 Mg1 Ca2 180.0 16_666 4_665 ?
Ca4 Mg1 Ca2 63.32(3) 14_566 17_666 ?
Ca4 Mg1 Ca2 116.68(3) 2_765 17_666 ?
Ca4 Mg1 Ca2 62.510(14) . 17_666 ?
Ca4 Mg1 Ca2 117.491(14) 13_776 17_666 ?
Ca4 Mg1 Ca2 117.491(15) 15_656 17_666 ?
Ca4 Mg1 Ca2 62.509(14) 3_675 17_666 ?
Ca2 Mg1 Ca2 63.949(11) 6_665 17_666 ?
Ca2 Mg1 Ca2 116.051(11) 18_666 17_666 ?
Ca2 Mg1 Ca2 116.051(11) 16_666 17_666 ?
Ca2 Mg1 Ca2 63.949(11) 4_665 17_666 ?
Ca4 Mg1 Ca2 116.68(3) 14_566 5_665 ?
Ca4 Mg1 Ca2 63.32(3) 2_765 5_665 ?
Ca4 Mg1 Ca2 117.490(14) . 5_665 ?
Ca4 Mg1 Ca2 62.509(14) 13_776 5_665 ?
Ca4 Mg1 Ca2 62.509(14) 15_656 5_665 ?
Ca4 Mg1 Ca2 117.491(15) 3_675 5_665 ?
Ca2 Mg1 Ca2 116.051(12) 6_665 5_665 ?
Ca2 Mg1 Ca2 63.949(11) 18_666 5_665 ?
Ca2 Mg1 Ca2 63.949(11) 16_666 5_665 ?
Ca2 Mg1 Ca2 116.051(12) 4_665 5_665 ?
Ca2 Mg1 Ca2 180.00(3) 17_666 5_665 ?
Ca4 Ca01 Ca4 180.0 14_566 2_765 ?
Ca4 Ca01 Ca4 115.07(3) 14_566 . ?
Ca4 Ca01 Ca4 64.93(3) 2_765 . ?
Ca4 Ca01 Ca4 64.93(3) 14_566 13_776 ?
Ca4 Ca01 Ca4 115.07(3) 2_765 13_776 ?
Ca4 Ca01 Ca4 180.0 . 13_776 ?
Ca4 Ca01 Ca4 64.93(3) 14_566 15_656 ?
Ca4 Ca01 Ca4 115.07(3) 2_765 15_656 ?
Ca4 Ca01 Ca4 115.07(3) . 15_656 ?
Ca4 Ca01 Ca4 64.93(3) 13_776 15_656 ?
Ca4 Ca01 Ca4 115.07(3) 14_566 3_675 ?
Ca4 Ca01 Ca4 64.93(3) 2_765 3_675 ?
Ca4 Ca01 Ca4 64.93(3) . 3_675 ?
Ca4 Ca01 Ca4 115.07(3) 13_776 3_675 ?
Ca4 Ca01 Ca4 180.0 15_656 3_675 ?
Ca4 Ca01 Ca2 62.510(14) 14_566 6_665 ?
Ca4 Ca01 Ca2 117.490(15) 2_765 6_665 ?
Ca4 Ca01 Ca2 117.490(14) . 6_665 ?
Ca4 Ca01 Ca2 62.511(14) 13_776 6_665 ?
Ca4 Ca01 Ca2 116.69(3) 15_656 6_665 ?
Ca4 Ca01 Ca2 63.31(3) 3_675 6_665 ?
Ca4 Ca01 Ca2 117.490(14) 14_566 18_666 ?
Ca4 Ca01 Ca2 62.510(14) 2_765 18_666 ?
Ca4 Ca01 Ca2 62.510(14) . 18_666 ?
Ca4 Ca01 Ca2 117.490(14) 13_776 18_666 ?
Ca4 Ca01 Ca2 63.31(3) 15_656 18_666 ?
Ca4 Ca01 Ca2 116.69(3) 3_675 18_666 ?
Ca2 Ca01 Ca2 180.0 6_665 18_666 ?
Ca4 Ca01 Ca2 117.490(14) 14_566 16_666 ?
Ca4 Ca01 Ca2 62.510(14) 2_765 16_666 ?
Ca4 Ca01 Ca2 116.69(3) . 16_666 ?
Ca4 Ca01 Ca2 63.31(3) 13_776 16_666 ?
Ca4 Ca01 Ca2 117.489(14) 15_656 16_666 ?
Ca4 Ca01 Ca2 62.511(14) 3_675 16_666 ?
Ca2 Ca01 Ca2 63.949(11) 6_665 16_666 ?
Ca2 Ca01 Ca2 116.051(11) 18_666 16_666 ?
Ca4 Ca01 Ca2 62.510(14) 14_566 4_665 ?
Ca4 Ca01 Ca2 117.490(14) 2_765 4_665 ?
Ca4 Ca01 Ca2 63.31(3) . 4_665 ?
Ca4 Ca01 Ca2 116.69(3) 13_776 4_665 ?
Ca4 Ca01 Ca2 62.511(14) 15_656 4_665 ?
Ca4 Ca01 Ca2 117.489(14) 3_675 4_665 ?
Ca2 Ca01 Ca2 116.051(11) 6_665 4_665 ?
Ca2 Ca01 Ca2 63.949(12) 18_666 4_665 ?
Ca2 Ca01 Ca2 180.0 16_666 4_665 ?
Ca4 Ca01 Ca2 63.32(3) 14_566 17_666 ?
Ca4 Ca01 Ca2 116.68(3) 2_765 17_666 ?
Ca4 Ca01 Ca2 62.510(14) . 17_666 ?
Ca4 Ca01 Ca2 117.491(14) 13_776 17_666 ?
Ca4 Ca01 Ca2 117.491(15) 15_656 17_666 ?
Ca4 Ca01 Ca2 62.509(14) 3_675 17_666 ?
Ca2 Ca01 Ca2 63.949(11) 6_665 17_666 ?
Ca2 Ca01 Ca2 116.051(11) 18_666 17_666 ?
Ca2 Ca01 Ca2 116.051(11) 16_666 17_666 ?
Ca2 Ca01 Ca2 63.949(11) 4_665 17_666 ?
Ca4 Ca01 Ca2 116.68(3) 14_566 5_665 ?
Ca4 Ca01 Ca2 63.32(3) 2_765 5_665 ?
Ca4 Ca01 Ca2 117.490(14) . 5_665 ?
Ca4 Ca01 Ca2 62.509(14) 13_776 5_665 ?
Ca4 Ca01 Ca2 62.509(14) 15_656 5_665 ?
Ca4 Ca01 Ca2 117.491(15) 3_675 5_665 ?
Ca2 Ca01 Ca2 116.051(12) 6_665 5_665 ?
Ca2 Ca01 Ca2 63.949(11) 18_666 5_665 ?
Ca2 Ca01 Ca2 63.949(11) 16_666 5_665 ?
Ca2 Ca01 Ca2 116.051(12) 4_665 5_665 ?
Ca2 Ca01 Ca2 180.00(3) 17_666 5_665 ?
Mg2 Mg2 Mg2 60.0 2_665 3_565 ?
Mg2 Mg2 Ca3 118.00(3) 2_665 . ?
Mg2 Mg2 Ca3 178.00(3) 3_565 . ?
Mg2 Mg2 Ca3 178.00(3) 2_665 2_765 ?
Mg2 Mg2 Ca3 118.00(3) 3_565 2_765 ?
Ca3 Mg2 Ca3 63.99(7) . 2_765 ?
Mg2 Mg2 Ca4 116.77(3) 2_665 16_556 ?
Mg2 Mg2 Ca4 116.77(3) 3_565 16_556 ?
Ca3 Mg2 Ca4 63.83(4) . 16_556 ?
Ca3 Mg2 Ca4 63.83(4) 2_765 16_556 ?
Mg2 Mg2 Ca4 116.77(3) 2_665 . ?
Mg2 Mg2 Ca4 116.77(3) 3_565 . ?
Ca3 Mg2 Ca4 63.83(4) . . ?
Ca3 Mg2 Ca4 63.83(4) 2_765 . ?
Ca4 Mg2 Ca4 117.32(8) 16_556 . ?
Mg2 Mg2 Ca1 63.74(3) 2_665 16_556 ?
Mg2 Mg2 Ca1 63.74(3) 3_565 16_556 ?
Ca3 Mg2 Ca1 115.67(3) . 16_556 ?
Ca3 Mg2 Ca1 115.67(3) 2_765 16_556 ?
Ca4 Mg2 Ca1 179.38(7) 16_556 16_556 ?
Ca4 Mg2 Ca1 62.06(3) . 16_556 ?
Mg2 Mg2 Ca1 63.74(3) 2_665 . ?
Mg2 Mg2 Ca1 63.74(3) 3_565 . ?
Ca3 Mg2 Ca1 115.67(3) . . ?
Ca3 Mg2 Ca1 115.67(3) 2_765 . ?
Ca4 Mg2 Ca1 62.06(3) 16_556 . ?
Ca4 Mg2 Ca1 179.38(7) . . ?
Ca1 Mg2 Ca1 118.56(7) 16_556 . ?
Mg2 Mg2 Ca5 64.45(4) 2_665 17_666 ?
Mg2 Mg2 Ca5 115.11(4) 3_565 17_666 ?
Ca3 Mg2 Ca5 63.25(3) . 17_666 ?
Ca3 Mg2 Ca5 117.18(6) 2_765 17_666 ?
Ca4 Mg2 Ca5 116.36(4) 16_556 17_666 ?
Ca4 Mg2 Ca5 63.904(19) . 17_666 ?
Ca1 Mg2 Ca5 63.46(2) 16_556 17_666 ?
Ca1 Mg2 Ca5 116.28(3) . 17_666 ?
Mg2 Mg2 Ca5 64.45(4) 2_665 2_665 ?
Mg2 Mg2 Ca5 115.11(4) 3_565 2_665 ?
Ca3 Mg2 Ca5 63.25(3) . 2_665 ?
Ca3 Mg2 Ca5 117.18(6) 2_765 2_665 ?
Ca4 Mg2 Ca5 63.903(19) 16_556 2_665 ?
Ca4 Mg2 Ca5 116.36(4) . 2_665 ?
Ca1 Mg2 Ca5 116.28(3) 16_556 2_665 ?
Ca1 Mg2 Ca5 63.46(2) . 2_665 ?
Ca5 Mg2 Ca5 62.32(3) 17_666 2_665 ?
Mg2 Mg2 Ca5 115.11(4) 2_665 16_556 ?
Mg2 Mg2 Ca5 64.45(4) 3_565 16_556 ?
Ca3 Mg2 Ca5 117.18(6) . 16_556 ?
Ca3 Mg2 Ca5 63.25(3) 2_765 16_556 ?
Ca4 Mg2 Ca5 116.36(4) 16_556 16_556 ?
Ca4 Mg2 Ca5 63.904(19) . 16_556 ?
Ca1 Mg2 Ca5 63.46(2) 16_556 16_556 ?
Ca1 Mg2 Ca5 116.28(3) . 16_556 ?
Ca5 Mg2 Ca5 117.68(3) 17_666 16_556 ?
Ca5 Mg2 Ca5 179.54(8) 2_665 16_556 ?
Mg2 Mg2 Ca5 115.11(4) 2_665 . ?
Mg2 Mg2 Ca5 64.45(4) 3_565 . ?
Ca3 Mg2 Ca5 117.18(6) . . ?
Ca3 Mg2 Ca5 63.25(3) 2_765 . ?
Ca4 Mg2 Ca5 63.904(19) 16_556 . ?
Ca4 Mg2 Ca5 116.36(4) . . ?
Ca1 Mg2 Ca5 116.28(3) 16_556 . ?
Ca1 Mg2 Ca5 63.46(2) . . ?
Ca5 Mg2 Ca5 179.54(8) 17_666 . ?
Ca5 Mg2 Ca5 117.68(4) 2_665 . ?
Ca5 Mg2 Ca5 62.32(3) 16_556 . ?
 
_refine_diff_density_max    1.186
_refine_diff_density_min   -1.396
_refine_diff_density_rms    0.200

_shelx_res_file
;
TITL PS_37_CCM_a8_Ca23Cu7Mg4_0m_a.res in P6(3)/mmc
    PS_37_CCM_a8_Ca23Cu7Mg4_0m_a.res
    created by SHELXL-2019/1 at 11:47:59 on 01-Jun-2023
REM Old TITL Integration of PS_37_CCM_a8_Ca23Cu7Mg4
REM SHELXT solution in P6(3)/mmc: R1 0.070, Rweak 0.003, Alpha 0.012
REM <I/s>   0.512 for   80 systematic absences,  Orientation as input
REM Formula found by SHELXT:  Ca23 Cu7 Mg4

CELL  0.71076  10.2358  10.2358  23.4131   90.000   90.000  120.000
ZERR    2.000   0.0020   0.0020   0.0050    0.030    0.030    0.030
LATT  1
SYMM -Y, X-Y, Z
SYMM -X+Y, -X, Z
SYMM -X, -Y, 1/2+Z
SYMM Y, -X+Y, 1/2+Z
SYMM X-Y, X, 1/2+Z
SYMM Y, X, -Z
SYMM X-Y, -Y, -Z
SYMM -X, -X+Y, -Z
SYMM -Y, -X, 1/2-Z
SYMM -X+Y, Y, 1/2-Z
SYMM X, X-Y, 1/2-Z
SFAC CA CU MG
UNIT 46 14 8
L.S. 10
BOND
acta
LIST 4
FMAP 2
eadp CA01 MG1
PLAN 20
WGHT    0.065200
FVAR       0.18321   0.93112
CA1   1    0.333333    0.666667    0.117565    10.16667    0.01623    0.01623 =
         0.02145    0.00000    0.00000    0.00811
CA2   1    0.413024    0.206512    0.032153    10.50000    0.02124    0.01772 =
         0.02498   -0.00031   -0.00062    0.01062
CA3   1    0.878365    1.121635    0.250000    10.25000    0.01851    0.01851 =
         0.02330    0.00000    0.00000    0.00695
CA4   1    0.752222    0.876111    0.381226    10.50000    0.02185    0.02215 =
         0.02152   -0.00204   -0.00407    0.01093
CA5   1    0.539506    0.460494    0.168244    10.50000    0.02398    0.02398 =
         0.01972    0.00074   -0.00074    0.01388
CU1   2    0.474451    0.525549    0.049592    10.50000    0.03137    0.03137 =
         0.01869   -0.00034    0.00034    0.02213
CU2   2    0.666667    0.333333    0.250000    10.08333    0.03123    0.03123 =
         0.02063    0.00000    0.00000    0.01561
MG1   3    1.000000    1.000000    0.500000    20.08333    0.02404    0.02404 =
         0.02204    0.00000    0.00000    0.01202
CA01  1    1.000000    1.000000    0.500000   -20.08333    0.02404    0.02404 =
         0.02204    0.00000    0.00000    0.01202
MG2   3    0.541167    0.770584    0.250000    10.25000    0.01495    0.01948 =
         0.02106    0.00000    0.00000    0.00748
HKLF 4


REM  PS_37_CCM_a8_Ca23Cu7Mg4_0m_a.res in P6(3)/mmc
REM wR2 = 0.1320, GooF = S = 1.156, Restrained GooF = 1.156 for all data
REM R1 = 0.0403 for 1060 Fo > 4sig(Fo) and 0.0864 for all 1592 data
REM 41 parameters refined using 0 restraints

END

WGHT      0.0652      0.0000

REM Highest difference peak  1.186,  deepest hole -1.396,  1-sigma level  0.200
Q1    1   1.0000  1.0000  0.3275  10.16667  0.05    1.19
Q2    1   1.0000  1.0000  0.2011  10.16667  0.05    0.85
Q3    1   0.7462  0.8198  0.3736  11.00000  0.05    0.80
Q4    1   0.8218  0.9109  0.3770  10.50000  0.05    0.80
Q5    1   0.3447  0.1724  0.0344  10.50000  0.05    0.74
Q6    1   1.0000  1.0000  0.2305  10.16667  0.05    0.68
Q7    1   0.6157  0.7631  0.2500  10.50000  0.05    0.65
Q8    1   1.0000  1.0000  0.3708  10.16667  0.05    0.65
Q9    1   0.8426  1.1574  0.2500  10.25000  0.05    0.64
Q10   1   0.9275  1.0725  0.1696  10.50000  0.05    0.63
Q11   1   0.8417  1.1583  0.1477  10.50000  0.05    0.62
Q12   1   0.6667  0.3333  0.0322  10.16667  0.05    0.62
Q13   1   0.4876  0.4016  0.1697  11.00000  0.05    0.61
Q14   1   0.8423  0.9211  0.4481  10.50000  0.05    0.61
Q15   1   0.9201  1.0799  0.3645  10.50000  0.05    0.60
Q16   1   0.9127  1.0873  0.2500  10.25000  0.05    0.60
Q17   1   0.9174  0.8348  0.5195  10.50000  0.05    0.59
Q18   1   1.0411  1.0822  0.2500  10.25000  0.05    0.59
Q19   1   0.8689  0.9344  0.4115  10.50000  0.05    0.58
Q20   1   0.8799  1.1201  0.1651  10.50000  0.05    0.58
;
_shelx_res_checksum   10029

_shelx_hkl_file
;
   1   0   0   -2.67    2.80
   1  -1   0    0.38    3.72
   0   1   0    2.01    2.98
   1   1   0   57.32    5.81
   1   1   0   66.62    6.34
   1  -2   0   46.85    7.14
   1  -2   0   51.82    7.18
   1  -2   0   69.55    8.48
   1   1   0   53.67    6.36
  -2   1   0   62.69    7.45
  -2   1   0   67.75    9.52
  -1   2   0   63.50    8.22
  -1   2   0   59.34    7.30
   2  -1   0   59.14    7.50
  -1  -1   0   70.30    6.00
   2  -1   0   73.17    9.51
  -1  -1   0   61.02    6.78
  -1  -1   0   57.40    6.80
  -1   2   0   53.58    8.07
   0  -2   0 1403.99   84.85
   0  -2   0 1457.26   86.17
   2   0   0 1365.71   85.56
  -2   2   0 1388.30   86.97
   2   0   0 1457.95   85.66
   2   0   0 1409.47   86.26
  -2   2   0 1424.78   86.49
   0   2   0 1412.86   84.87
   0   2   0 1431.31   86.11
  -2   0   0 1420.26   85.66
   0   2   0 1417.62   86.10
   2  -2   0 1429.04   87.11
   2  -2   0 1412.96   86.50
   2  -2   0 1427.80   86.54
  -2   0   0 1431.83   85.62
  -2   0   0 1427.17   86.48
   2  -3   0  557.26   37.02
  -3   1   0  531.22   35.92
  -3   1   0  547.74   38.55
  -3   1   0  530.07   35.77
   2  -3   0  573.19   37.61
   2  -3   0  570.73   37.57
   1   2   0  549.18   35.57
   1   2   0  586.54   35.68
  -1  -2   0  531.80   35.61
  -2   3   0  543.32   36.99
  -1  -2   0  539.73   35.81
  -2   3   0  548.90   36.91
   3  -1   0  557.19   37.91
   3  -1   0  560.33   35.72
   3  -1   0  539.18   35.73
  -2   3   0  586.17   37.36
  -3   2   0  568.13   36.23
   1  -3   0  537.98   35.11
  -3   2   0  477.81   35.22
   1  -3   0  540.31   36.15
   2   1   0  537.29   34.51
   2   1   0  547.17   34.75
   1  -3   0  552.20   36.42
   2   1   0  549.97   34.55
   3  -2   0  536.88   35.81
  -1   3   0  570.22   36.27
  -1   3   0  539.10   35.09
   3  -2   0  575.11   38.07
   3  -2   0  534.79   36.08
  -2  -1   0  527.90   34.64
  -2  -1   0  542.52   34.84
  -2  -1   0  543.42   34.57
  -1   3   0  561.90   36.24
   3   0   0 3389.96  199.49
  -3   3   0 3202.57  200.47
   3   0   0 3392.59  200.34
  -3   3   0 3385.47  200.61
   0  -3   0 3250.75  200.00
  -3   3   0 3225.29  200.93
   0  -3   0 3323.40  198.36
   3   0   0 3311.03  199.38
   0   3   0 3413.91  200.14
  -3   0   0 3378.84  199.42
  -3   0   0 3383.62  199.45
   0   3   0 3253.40  199.98
   3  -3   0 3339.44  200.50
   3  -3   0 3271.33  201.06
  -3   0   0 3387.97  200.38
   0   3   0 3245.81  198.36
   3  -3   0 3469.83  200.73
  -4   1   0  177.54   17.64
   1   3   0  216.64   18.26
   1   3   0  190.68   18.17
   3  -4   0  256.10   21.30
   3  -4   0  190.17   20.15
  -4   1   0  226.38   22.72
  -4   1   0  199.03   18.11
   3  -4   0  216.12   20.41
   4  -1   0  214.58   17.88
  -3   4   0  221.16   21.35
  -1  -3   0  194.92   18.26
  -3   4   0  225.98   20.89
   4  -1   0  223.29   21.57
  -1  -3   0  205.67   18.26
   4  -1   0  239.37   17.84
  -4   2   0 8909.73  532.45
   2  -4   0 9003.15  532.44
  -4   2   0 9112.11  533.70
   2  -4   0 9093.02  533.14
   2   2   0 8964.44  531.09
   2   2   0 8885.28  531.86
   2  -4   0 8941.67  533.02
   2   2   0 9054.37  531.90
  -2  -2   0 8848.54  531.83
   4  -2   0 9218.20  533.73
  -2  -2   0 8481.91  531.76
  -2   4   0 9126.45  533.11
  -2   4   0 8625.83  532.86
   4  -2   0 8903.25  532.48
  -2  -2   0 8820.78  531.06
  -2   4   0 8921.92  532.42
   3   1   0  238.90   17.27
  -4   3   0  207.01   19.60
   3   1   0  176.13   17.13
   3   1   0  221.85   18.53
   1  -4   0  219.74   19.76
  -4   3   0  190.26   19.42
   1  -4   0  195.80   19.87
  -4   3   0  206.23   23.23
   1  -4   0  226.11   17.31
  -1   4   0  184.09   19.46
   4  -3   0  216.20   19.91
   4  -3   0  220.44   23.33
  -1   4   0  228.35   17.44
  -3  -1   0  240.53   18.71
   4  -3   0  211.97   19.44
  -3  -1   0  229.45   17.47
  -3  -1   0  211.37   17.24
  -1   4   0  220.43   19.73
   0  -4   0  662.57   38.23
   0  -4   0  596.81   41.55
   4   0   0  583.80   40.20
  -4   4   0  661.00   42.79
  -4   4   0  611.76   42.18
   4   0   0  591.17   40.09
  -4   4   0  668.69   44.19
   4   0   0  621.69   42.25
   0   4   0  627.51   38.28
  -4   0   0  587.72   40.25
   0   4   0  605.06   41.40
   0   4   0  624.77   41.46
   4  -4   0  620.65   43.78
   4  -4   0  634.46   42.60
   4  -4   0  616.05   42.78
  -4   0   0  639.49   40.28
  -4   0   0  646.89   42.54
   1   4   0  125.83   12.99
   4  -5   0  138.61   15.89
   1   4   0  144.05   14.31
  -5   1   0  143.81   14.82
  -5   1   0  143.32   16.98
  -5   1   0  166.76   15.61
   4  -5   0  133.40   16.53
  -4   5   0  104.10   13.03
   5  -1   0  138.63   13.27
   5  -1   0  106.79   15.93
  -4   5   0  135.61   15.57
  -1  -4   0  137.67   13.90
   5  -1   0  178.43   14.85
  -4   5   0  120.03   16.12
  -1  -4   0  115.51   13.81
   3  -5   0  129.87   14.60
  -5   2   0  105.17   12.25
   2   3   0  115.83    9.52
   2   3   0  138.49   12.88
   3  -5   0  100.70   13.95
  -5   2   0  112.22   12.76
  -5   2   0  118.76   17.47
   2   3   0  131.43   12.34
   3  -5   0  123.70   15.81
  -3   5   0  127.77   15.93
  -2  -3   0  112.35   12.10
  -2  -3   0  134.20   12.86
   5  -2   0  139.96   13.28
  -3   5   0  135.33   15.26
  -3   5   0  121.20   14.40
   5  -2   0   98.34   11.71
   5  -2   0  175.90   18.39
   3   2   0  119.47   11.65
   3   2   0   97.58   10.95
   2  -5   0  109.34   12.85
   2  -5   0   99.74   12.62
  -5   3   0  129.14   13.75
   3   2   0  150.88   12.67
   2  -5   0  114.84   13.08
  -5   3   0  140.71   16.20
  -2   5   0  101.63   13.16
   5  -3   0  114.00   12.85
   5  -3   0  136.86   16.66
  -3  -2   0  135.43   13.45
  -3  -2   0  116.84   12.87
  -2   5   0  133.14   13.16
  -3  -2   0  135.33   12.33
   5  -3   0  108.64   13.04
   1  -5   0  182.72   17.33
   4   1   0  154.25   14.47
   4   1   0  146.26   12.75
  -5   4   0  106.65   12.53
   1  -5   0  139.70   13.42
   1  -5   0  160.81   15.99
  -5   4   0   89.09   13.50
  -5   4   0   98.10   16.51
   4   1   0  131.46   12.59
   5  -4   0  191.76   17.43
  -1   5   0  128.13   15.39
  -4  -1   0  141.54   14.25
   5  -4   0  130.03   17.30
   5  -4   0  124.62   14.74
  -4  -1   0  139.48   14.35
  -1   5   0  161.28   16.09
  -4  -1   0  151.44   14.39
  -1   5   0  113.85   11.74
   5   0   0  643.24   40.75
   0  -5   0  597.07   37.73
  -5   5   0  650.09   44.99
  -5   5   0  644.93   43.36
   5   0   0  683.39   43.29
   5   0   0  562.08   42.12
  -5   5   0  608.33   43.00
   0  -5   0  617.68   42.39
   5  -5   0  621.11   43.28
  -5   0   0  656.86   43.39
  -5   0   0  601.27   40.64
  -5   0   0  619.25   40.64
   5  -5   0  661.94   44.05
   0   5   0  612.77   42.12
   5  -5   0  560.80   44.25
   0   5   0  592.26   41.95
  -6   1   0   16.71   11.89
   1   5   0    2.61    7.92
   1   5   0   17.51    9.66
  -6   1   0    9.32    7.73
  -6   1   0   12.31    8.32
   5  -6   0    7.31   10.64
   5  -6   0   19.45   10.99
   5  -6   0   16.89   14.68
  -1  -5   0    7.16    8.97
  -1  -5   0    8.70    7.61
  -5   6   0   14.13   12.56
   6  -1   0   11.63    7.69
   6  -1   0    7.99    7.76
  -5   6   0    9.19    9.74
  -5   6   0    7.45    8.81
   6  -1   0    3.75   11.97
   4  -6   0  200.95   19.73
   2   4   0  180.49   17.76
   4  -6   0  224.57   22.19
  -6   2   0  196.43   18.54
   4  -6   0  131.72   16.47
   2   4   0  172.18   17.87
  -6   2   0  168.75   17.68
  -6   2   0  216.25   20.96
   6  -2   0  203.70   20.81
   6  -2   0  187.86   17.84
   6  -2   0  166.96   16.73
  -4   6   0  198.06   19.71
  -2  -4   0  178.44   18.06
  -4   6   0  161.88   19.03
  -2  -4   0  173.26   17.29
  -4   6   0  184.65   19.15
   3  -6   0 9655.18  581.51
  -6   3   0 9771.07  581.68
   3  -6   0 9348.42  582.35
   3  -6   0 9975.05  582.73
   3   3   0 9883.94  580.63
   3   3   0 9629.44  579.29
  -6   3   0 9816.42  583.45
   3   3   0 9986.09  580.75
  -3  -3   0 9501.63  580.59
   6  -3   0 9698.46  583.22
  -3   6   0 9514.54  582.34
   6  -3   0 9999.00  581.95
  -3   6   0 9620.73  581.44
  -3   6   0 9938.96  582.65
   2  -6   0  205.33   21.84
   4   2   0  188.70   18.06
  -6   4   0  170.53   21.52
  -6   4   0  147.15   17.44
   2  -6   0  192.31   19.59
   4   2   0  191.52   17.24
   2  -6   0  203.30   18.55
  -6   4   0  199.82   20.91
   4   2   0  181.45   17.46
  -2   6   0  239.58   19.14
  -2   6   0  200.27   20.85
  -2   6   0  215.68   20.93
   6  -4   0  178.02   21.16
  -4  -2   0  209.06   18.21
   6  -4   0  198.11   20.43
  -4  -2   0  232.48   17.85
  -4  -2   0  193.40   17.66
   6  -4   0  191.22   20.13
   5   1   0   13.51    9.67
  -6   5   0    9.42   12.91
   1  -6   0   22.75    8.90
   1  -6   0    7.18   10.08
  -6   5   0    9.16    8.41
   5   1   0   26.11    8.02
  -6   5   0    8.71   10.98
   5   1   0    6.29    6.82
   1  -6   0   22.17    6.48
   6  -5   0   14.00    9.44
   6  -5   0   13.28   10.44
  -5  -1   0   18.98    7.73
  -1   6   0   11.66    6.37
  -1   6   0   23.01    8.72
  -5  -1   0    4.10    7.40
   6  -5   0   20.36   11.93
  -5  -1   0   17.94   10.26
   0  -6   0   18.08   11.30
  -6   6   0   17.18   14.43
  -6   6   0   11.59   11.02
   6   0   0   17.29    8.42
  -6   6   0   11.46   11.86
   6   0   0    4.71   11.16
   6   0   0   11.63    7.27
  -6   0   0   11.58   11.62
  -6   0   0   14.53    8.49
   0   6   0   28.19   10.09
   6  -6   0   11.23   11.43
   6  -6   0   32.04   11.67
  -6   0   0   23.12    8.66
   6  -6   0   27.27   14.63
  -7   1   0  -11.67   12.17
  -7   1   0   16.30    8.20
   6  -7   0    4.94   14.15
  -7   1   0    6.19    8.50
   1   6   0   -2.88    9.16
   1   6   0    0.55    9.14
   6  -7   0    2.95   10.43
   6  -7   0  -25.25    8.56
  -6   7   0   16.07   13.09
   7  -1   0    0.45   12.57
  -1  -6   0    9.17    8.79
   7  -1   0    8.21    7.93
  -1  -6   0   15.32    9.30
  -6   7   0  -17.94   10.26
   7  -1   0   19.67    9.01
  -6   7   0   14.67   16.32
   5  -7   0  512.15   37.12
   2   5   0  470.20   33.27
   5  -7   0  433.49   36.49
  -7   2   0  470.89   33.04
   2   5   0  449.34   33.26
   5  -7   0  443.50   36.27
  -7   2   0  435.17   38.34
  -7   2   0  428.91   33.48
  -5   7   0  483.94   37.38
   7  -2   0  445.54   33.33
  -2  -5   0  432.24   33.13
   7  -2   0  459.46   33.20
  -2  -5   0  497.29   33.52
   7  -2   0  461.13   38.14
  -5   7   0  475.56   37.62
  -5   7   0  399.17   35.34
   4  -7   0  135.78   19.00
  -7   3   0  112.71   21.50
   4  -7   0  123.68   16.34
   3   4   0   99.67   12.98
   4  -7   0  117.65   16.97
  -7   3   0  115.69   14.40
   3   4   0  105.85   12.79
   7  -3   0  118.55   14.12
   7  -3   0  127.73   19.74
  -4   7   0  112.18   16.11
   7  -3   0   70.92   13.26
  -4   7   0  117.33   16.39
  -3  -4   0  104.76   13.38
  -3  -4   0   94.53   12.91
  -4   7   0  119.14   16.54
   3  -7   0  131.49   18.01
   4   3   0  112.31   11.46
   4   3   0  109.07   12.50
   3  -7   0  112.41   14.16
  -7   4   0   84.61   13.66
   3  -7   0   88.28   14.96
   4   3   0   95.18   11.89
  -7   4   0   99.22   18.01
   7  -4   0   91.92   17.01
  -3   7   0  108.96   15.68
   7  -4   0  125.65   14.58
  -3   7   0  111.09   17.27
   7  -4   0   92.21   13.52
  -3   7   0  105.66   14.51
  -4  -3   0  116.18   12.71
  -7   5   0  438.54   39.47
   5   2   0  418.73   33.17
   2  -7   0  480.81   36.46
   5   2   0  466.23   32.35
   2  -7   0  415.62   35.33
  -7   5   0  472.92   35.58
  -7   5   0  500.58   36.04
   5   2   0  443.89   32.38
   2  -7   0  478.41   32.56
  -5  -2   0  479.02   32.50
   7  -5   0  456.55   35.56
  -2   7   0  450.99   35.46
  -2   7   0  490.50   32.66
  -5  -2   0  424.97   32.24
  -2   7   0  492.37   36.37
  -5  -2   0  490.31   33.30
   7  -5   0  464.08   35.30
   1  -7   0  -11.35   10.53
  -7   6   0   -2.37   11.25
   6   1   0   -6.64    6.56
  -7   6   0   -5.20    7.53
   1  -7   0    7.93    6.02
   6   1   0   -1.63   10.36
  -7   6   0  -11.03   14.60
   1  -7   0   -1.63   11.72
   6   1   0   11.93    8.63
  -6  -1   0   -9.24   10.53
  -1   7   0    5.52    9.52
   7  -6   0   -1.90   11.60
  -1   7   0    6.37   10.55
  -6  -1   0   -1.08    7.90
   7  -6   0   -5.97   14.50
  -6  -1   0    1.61    7.46
  -1   7   0   -0.62    6.00
   7  -6   0    4.84   10.71
   0  -7   0  438.00   32.52
   7   0   0  370.45   28.45
   7   0   0  380.21   29.10
  -7   7   0  389.43   37.75
   7   0   0  355.53   33.32
  -7   7   0  389.91   32.68
  -7   7   0  397.09   35.38
  -7   0   0  392.03   29.15
  -7   0   0  354.97   32.93
   0   7   0  398.28   31.85
   7  -7   0  378.88   36.71
   0   7   0  425.78   34.88
  -7   0   0  346.54   28.36
   7  -7   0  344.32   33.39
   7  -7   0  429.84   33.92
   7  -8   0 2000.63  131.56
  -8   1   0 2105.81  127.27
  -8   1   0 2123.02  130.45
   7  -8   0 1995.41  130.15
  -8   1   0 2035.33  126.74
   1   7   0 1920.14  128.10
   7  -8   0 2145.44  131.03
   1   7   0 2066.18  128.28
  -1  -7   0 2135.64  128.63
   8  -1   0 2139.21  127.08
  -7   8   0 1931.86  129.63
  -7   8   0 2118.16  131.31
   8  -1   0 2015.40  130.49
  -1  -7   0 2119.55  128.44
   8  -1   0 2019.30  126.89
  -7   8   0 2082.20  130.96
  -8   2   0   37.68   10.74
   6  -8   0   14.38   14.38
   2   6   0   18.90    9.74
  -8   2   0   33.13   15.78
  -8   2   0   13.87    9.74
   2   6   0   34.43   10.39
   6  -8   0   13.18   15.10
   6  -8   0   19.23   10.71
  -6   8   0    8.18    8.91
  -6   8   0   15.41   14.30
   8  -2   0   23.98    9.35
   8  -2   0   12.16   10.56
  -2  -6   0   13.01    9.40
  -2  -6   0   14.51   10.01
   8  -2   0    5.64   14.39
  -6   8   0   13.01   15.12
   3   5   0   31.89   10.18
   3   5   0   28.23   10.39
   5  -8   0   -1.99   12.99
   5  -8   0   29.96   14.24
   5  -8   0   19.46   11.24
  -8   3   0   21.23   10.32
  -8   3   0   32.90   11.17
  -8   3   0   14.14   15.35
   8  -3   0   34.51   10.80
  -3  -5   0   31.65   10.04
   8  -3   0   -4.63   14.00
   8  -3   0   14.14    9.98
  -5   8   0   39.99   13.61
  -5   8   0   19.82   12.28
  -3  -5   0   35.76    9.82
  -5   8   0   44.33   13.71
  -8   4   0   13.99   11.29
   4   4   0   22.93    8.87
   4  -8   0    2.54    8.44
  -8   4   0   -5.25   14.39
   4  -8   0   27.90   14.19
  -8   4   0   22.88    9.93
   4   4   0   -0.33    5.54
   4   4   0   19.80    8.69
   4  -8   0   14.85   11.73
   8  -4   0   30.14   11.78
   8  -4   0    8.84    8.90
  -4  -4   0   17.99    9.02
  -4   8   0   12.72   12.20
   8  -4   0   -2.77   14.49
  -4   8   0   -5.65   11.19
  -4   8   0    9.13    8.90
  -4  -4   0   17.92    9.56
   5   3   0   10.05    8.83
   3  -8   0   25.41   10.74
  -8   5   0   13.09   17.06
   5   3   0   33.62    9.28
  -8   5   0   16.31   11.34
   5   3   0   33.63    9.60
   3  -8   0    9.07    8.79
   3  -8   0    9.66   21.84
  -8   5   0    9.36    8.23
  -3   8   0    4.98   11.93
   8  -5   0   15.83   16.68
  -3   8   0   26.07   10.82
  -3   8   0   28.69   10.52
  -5  -3   0   25.01    9.38
  -5  -3   0   18.22    7.75
   8  -5   0   15.67   11.31
   8  -5   0   29.83   10.79
   2  -8   0   21.41   13.12
  -8   6   0   16.60   11.62
   2  -8   0   30.32   11.29
   6   2   0    5.60   10.81
   2  -8   0    8.50    8.34
   6   2   0   19.66    8.80
  -8   6   0   32.97   12.25
  -8   6   0   15.88   15.27
   6   2   0   23.72    9.45
   8  -6   0   24.82   11.50
   8  -6   0   25.85   12.71
  -2   8   0   16.78    9.71
  -6  -2   0   25.35    9.20
  -6  -2   0   22.61   10.06
  -2   8   0   34.45   13.69
  -2   8   0   -2.75    8.13
  -6  -2   0   25.95    9.48
   8  -6   0   36.91   17.23
   7   1   0 1973.31  125.67
   7   1   0 2060.65  125.87
   1  -8   0 2124.59  128.92
   7   1   0 2072.56  128.37
  -8   7   0 2029.46  129.39
  -8   7   0 2024.00  128.80
  -8   7   0 2139.81  131.57
   1  -8   0 2030.22  123.10
   1  -8   0 2113.58  128.77
  -7  -1   0 2082.61  125.85
   8  -7   0 2087.50  129.57
  -1   8   0 2106.04  123.08
   8  -7   0 2082.96  129.32
   8  -7   0 1967.02  131.41
  -1   8   0 2022.62  128.37
  -7  -1   0 1927.02  125.28
  -1   8   0 1959.71  128.44
  -7  -1   0 2068.36  127.68
   8   0   0    5.72   14.74
   8   0   0    1.79    8.95
  -8   8   0   -1.88   15.49
  -8   8   0   -0.78   15.29
   0  -8   0    9.85   11.27
  -8   8   0  -17.16   13.13
   8   0   0   -0.71    8.13
   0   8   0   25.83   13.33
  -8   0   0   31.86   13.84
   0   8   0   24.29   19.78
   8  -8   0   -3.43   10.96
   8  -8   0  -18.12   16.02
  -8   0   0   -6.17    9.06
  -8   0   0   -1.41    8.34
   8  -8   0   18.38   15.53
  -9   1   0   25.83   11.09
   8  -9   0   29.90   15.66
  -9   1   0   35.25   11.20
   1   8   0   42.83   12.59
  -9   1   0   25.16   15.19
   8  -9   0   18.21   18.73
   8  -9   0   42.77   16.65
   1   8   0   64.63   16.17
   9  -1   0   50.93   12.27
  -1  -8   0   51.92   14.40
  -8   9   0   28.45   14.86
   9  -1   0   33.70   10.34
  -8   9   0   26.11   16.86
  -1  -8   0   57.53   14.61
   9  -1   0   32.27   17.93
  -8   9   0   62.69   18.41
   7  -9   0  178.32   21.10
   2   7   0  166.20   19.40
   7  -9   0  213.48   26.75
  -9   2   0  193.27   19.41
   7  -9   0  187.97   23.29
  -9   2   0  221.67   22.33
  -9   2   0  195.95   24.56
  -7   9   0  217.35   24.81
  -2  -7   0  179.82   19.28
  -7   9   0  211.07   25.20
   9  -2   0  221.46   26.96
  -7   9   0  166.05   23.05
  -2  -7   0  231.95   23.23
   9  -2   0  224.95   28.74
   9  -2   0  196.84   20.11
   3   6   0  115.46   15.46
  -9   3   0  103.80   14.00
   6  -9   0  142.89   21.99
  -9   3   0  102.97   20.09
   3   6   0  115.54   15.02
   6  -9   0  115.40   19.41
  -9   3   0  128.70   15.88
   6  -9   0   72.67   16.38
  -6   9   0  102.17   18.56
  -3  -6   0   96.11   15.11
  -3  -6   0   93.67   13.89
   9  -3   0   86.96   14.59
   9  -3   0  164.47   24.79
  -6   9   0  118.97   19.60
  -6   9   0   95.43   18.20
   9  -3   0  113.35   15.48
  -9   4   0  104.10   17.01
   4   5   0  151.10   16.03
   4   5   0  102.79   14.81
   5  -9   0  144.70   24.51
  -9   4   0   94.53   14.88
   5  -9   0  126.32   21.72
   5  -9   0  114.01   18.34
  -9   4   0  139.38   22.81
   9  -4   0  125.45   16.60
   9  -4   0  133.93   17.57
   9  -4   0  119.60   22.74
  -4  -5   0  124.04   15.14
  -5   9   0  140.71   20.39
  -5   9   0  124.18   20.14
  -4  -5   0  129.48   15.05
  -5   9   0   98.79   17.37
   5   4   0  158.75   16.03
   5   4   0  118.56   14.11
   4  -9   0  114.41   16.51
  -9   5   0  126.82   23.32
  -9   5   0  112.87   17.11
   4  -9   0  100.32   16.88
   5   4   0  119.75   11.58
   4  -9   0   95.86   16.57
  -4   9   0   68.08   16.94
   9  -5   0   93.47   21.96
  -5  -4   0  108.13   13.99
  -5  -4   0  125.91   14.94
  -4   9   0   95.28   17.26
   9  -5   0  126.04   18.11
  -4   9   0  127.36   17.45
   6   3   0   90.45   13.82
   3  -9   0   89.52   14.10
   3  -9   0  105.37   15.95
   6   3   0  134.95   14.86
  -9   6   0   60.08   18.89
  -9   6   0   99.98   16.06
  -9   6   0   99.26   17.24
   3  -9   0   92.05   17.47
   6   3   0  129.98   14.60
   9  -6   0  100.99   22.28
  -6  -3   0  104.06   13.01
  -3   9   0  120.96   14.60
   9  -6   0  119.20   15.57
  -3   9   0  109.48   15.56
  -3   9   0   93.05   17.37
   9  -6   0  124.76   19.21
  -6  -3   0  114.75   14.02
   7   2   0  234.52   21.98
   7   2   0  231.91   21.88
   2  -9   0  169.12   22.94
  -9   7   0  211.26   27.73
  -9   7   0  176.36   22.96
   7   2   0  209.87   19.32
   2  -9   0  204.74   18.66
  -9   7   0  177.32   22.49
   9  -7   0  197.96   23.68
  -2   9   0  197.68   24.12
  -2   9   0  211.50   24.29
  -2   9   0  202.03   18.02
  -7  -2   0  192.19   19.71
  -7  -2   0  200.18   20.55
  -7  -2   0  193.25   19.86
   9  -7   0  170.78   22.58
   8   1   0   73.49   12.42
   8   1   0   65.41   11.91
  -9   8   0   56.03   16.40
  -9   8   0   33.03   15.27
  -9   8   0   30.96   18.43
   8   1   0   18.45   15.02
   1  -9   0   39.34   14.77
   1  -9   0   50.92   16.16
  -1   9   0   58.29   16.11
   9  -8   0   74.17   15.90
  -1   9   0   14.13   12.07
   9  -8   0   33.74   19.94
  -8  -1   0   50.51   11.65
   9  -8   0   29.56   14.47
  -8  -1   0   41.52   15.22
  -8  -1   0   29.69   10.10
   9   0   0  513.92   35.67
  -9   9   0  433.40   44.60
   9   0   0  484.73   36.17
  -9   9   0  424.71   39.85
   0  -9   0  453.31   38.94
   9   0   0  409.59   41.53
  -9   9   0  501.96   46.50
   9  -9   0  416.99   43.90
   9  -9   0  524.21   42.54
  -9   0   0  500.51   35.92
  -9   0   0  517.30   40.67
   0   9   0  456.98   38.99
   0   9   0  493.48   39.01
  -9   0   0  506.03   35.25
   9  -9   0  427.52   41.61
 -10   1   0   30.73   11.86
 -10   1   0   46.88   16.74
 -10   1   0   34.36   11.12
   9 -10   0   59.24   19.72
   9 -10   0   27.70   14.97
   9 -10   0   13.09   21.48
  -9  10   0   25.37   13.42
  -1  -9   0   50.89   15.58
  10  -1   0   19.72   21.63
  -9  10   0   53.69   20.07
   8 -10   0  215.86   26.74
 -10   2   0  135.27   16.64
   8 -10   0   32.14   23.03
   8 -10   0  171.39   24.20
 -10   2   0  124.81   21.72
 -10   2   0   99.19   16.02
  -2  -8   0  101.82   17.62
  -8  10   0   71.71   16.24
  -8  10   0  142.88   24.25
  -8  10   0  109.87   21.54
  -2  -8   0  110.57   16.43
   7 -10   0  106.38   22.71
   3   7   0  185.17   21.11
   7 -10   0  194.69   25.72
 -10   3   0  164.09   24.77
 -10   3   0  165.86   18.91
 -10   3   0  148.46   18.16
   3   7   0  172.57   19.74
  10  -3   0  156.47   18.64
  -7  10   0  201.96   26.10
  10  -3   0  117.79   26.47
  10  -3   0  146.84   18.85
  -7  10   0  123.40   21.89
  -3  -7   0  173.45   19.89
  -3  -7   0  178.71   18.76
  -7  10   0  153.80   31.74
   6 -10   0   99.53   21.38
 -10   4   0   73.65   13.33
   6 -10   0   63.34   17.45
 -10   4   0   78.51   20.57
   4   6   0   80.29   13.91
   4   6   0   80.00   14.11
   6 -10   0   58.76   16.71
 -10   4   0   87.56   14.87
  10  -4   0   49.86   21.19
  -4  -6   0   84.74   13.46
  10  -4   0   48.42   13.52
  10  -4   0   81.57   15.29
  -6  10   0   72.12   19.54
  -6  10   0   78.06   17.42
  -4  -6   0   75.10   13.89
  -6  10   0   74.25   17.10
   5   5   0 3667.34  217.67
 -10   5   0 3530.89  219.13
   5 -10   0 3548.43  219.37
 -10   5   0 3715.20  219.76
   5 -10   0 3579.46  221.46
 -10   5   0 3705.18  223.49
   5 -10   0 3706.29  222.18
   5   5   0 3487.99  217.59
  -5  10   0 3406.81  220.68
  10  -5   0 3459.54  223.68
  -5  10   0 3695.00  221.46
  10  -5   0 3356.61  219.24
  -5  -5   0 3549.42  217.52
  -5  -5   0 3612.27  217.36
  -5  10   0 3737.19  222.24
  10  -5   0 3555.09  219.31
 -10   6   0   52.47   13.76
 -10   6   0   65.75   16.29
   4 -10   0  105.36   20.88
   6   4   0   73.53   11.43
   6   4   0  114.56   15.01
   4 -10   0   88.15   19.53
   6   4   0   80.70   13.65
 -10   6   0  100.03   20.99
  -4  10   0   75.42   17.66
  10  -6   0   69.35   22.29
  -6  -4   0   95.37   14.09
  10  -6   0   93.76   16.74
  -6  -4   0   83.42   13.44
  -4  10   0   87.69   18.36
  10  -6   0   68.50   14.99
  -4  10   0   80.34   14.87
   7   3   0  155.79   17.29
 -10   7   0  125.53   19.72
   3 -10   0  129.42   16.43
   7   3   0  147.55   17.77
 -10   7   0  152.72   25.30
   7   3   0  161.00   17.31
   3 -10   0  164.56   22.11
 -10   7   0  177.51   22.52
   3 -10   0  137.27   21.69
  -3  10   0  215.47   25.94
  -3  10   0  151.15   22.65
  10  -7   0  151.76   28.28
  -7  -3   0  159.77   17.14
  -3  10   0  155.15   16.76
  10  -7   0  204.03   25.18
  10  -7   0  155.73   21.42
   8   2   0  117.11   19.14
 -10   8   0  151.46   22.95
   8   2   0  150.81   21.04
 -10   8   0   79.71   22.03
   2 -10   0  116.49   18.73
  -2  10   0   95.09   18.66
  -2  10   0  142.78   13.20
  -8  -2   0  128.16   17.47
  -8  -2   0  111.78   15.06
  10  -8   0  144.17   21.99
  10  -8   0  170.44   23.86
  -8  -2   0  134.79   15.36
   1 -10   0   29.96   15.24
   9   1   0   19.42   17.27
 -10   9   0   88.40   21.31
 -10   9   0   64.85   21.30
  10  -9   0   40.78   17.01
  -9  -1   0   24.05   10.35
  -9  -1   0   49.33   15.09
  -9  -1   0   45.76   11.38
  10  -9   0   45.12   17.96
 -10  10   0   91.38   22.37
   0 -10   0   45.61   15.88
 -10  10   0   55.48   20.00
 -10   0   0   63.97   12.42
  10 -10   0   44.05   16.66
 -10   0   0   75.86   17.82
 -10   0   0   68.11   13.56
 -11   1   0   24.33   15.42
  -1 -10   0   -2.75   14.50
 -10  11   0    8.52   17.79
 -10  11   0   -4.19   21.02
 -11   2   0   81.92   20.98
 -11   2   0  127.43   17.63
   9 -11   0  161.36   24.50
  -2  -9   0  108.18   17.53
  -9  11   0  131.35   26.74
  -9  11   0  124.50   23.38
  11  -2   0   75.47   27.11
   8 -11   0   13.31   16.56
 -11   3   0   34.78   17.69
   8 -11   0  -32.13   17.26
 -11   3   0   11.65   12.59
  -3  -8   0   17.77   11.80
  -8  11   0   16.20   16.30
  -8  11   0    2.12   15.43
   7 -11   0   11.67   16.97
   7 -11   0  -22.31   15.20
 -11   4   0   -1.17   17.03
 -11   4   0    6.98   11.77
  -4  -7   0   -2.31   11.42
  -7  11   0   -1.50   15.21
  -7  11   0   -5.63   17.03
  -7  11   0   -6.69   14.32
  -4  -7   0  -19.55   11.15
   6 -11   0  -32.70   13.91
 -11   5   0   19.72   13.60
 -11   5   0  -20.87   16.45
   6 -11   0  -12.99   15.17
  -6  11   0  -16.68   14.00
  -6  11   0  -10.19   14.47
  -5  -6   0   10.48   10.31
  -5  -6   0    4.97   10.90
  -6  11   0   15.85   14.04
   5 -11   0  -15.60   18.61
 -11   6   0   12.17   18.62
 -11   6   0    7.74   13.72
   5 -11   0    1.10   16.09
  -6  -5   0   -5.36   10.02
  -5  11   0    6.35   13.59
  -6  -5   0   -1.33    9.63
  -5  11   0   13.39   12.67
  -5  11   0    5.34   16.60
   4 -11   0  -28.78   11.76
 -11   7   0  -30.25   17.26
 -11   7   0   16.38   14.80
  -4  11   0   22.58   11.35
  -4  11   0   15.80   17.33
  -7  -4   0    6.12    9.86
  -7  -4   0   -8.44   10.15
  -4  11   0    8.04   12.00
 -11   8   0    1.53   18.81
 -11   8   0    2.99   16.26
   3 -11   0   23.84   15.79
  -8  -3   0    9.49   10.04
  -3  11   0   21.14   12.75
 -11   9   0   77.86   18.82
   2 -11   0   97.09   22.28
 -11   9   0  126.88   24.50
  -9  -2   0  113.00   15.30
  -9  -2   0  111.20   15.52
  -9  -2   0  117.81   17.07
   1 -11   0   10.02   16.12
 -11  10   0    4.77   20.90
 -11  10   0  -11.43   18.37
 -10  -1   0   -2.81   13.45
   0 -11   0   65.13   18.32
 -11  11   0   55.71   22.33
 -11  11   0   45.76   16.84
 -11   0   0   97.26   20.12
 -11   0   0   86.14   14.49
 -12   1   0   -0.30   11.93
 -12   1   0   43.26   18.36
  -1 -11   0   35.84   16.69
 -11  12   0  -12.46   18.22
 -11  12   0   -8.17   23.54
 -12   2   0   25.49   18.01
 -12   2   0   51.16   14.19
 -10  12   0   65.56   20.79
 -10  12   0   20.87   25.53
  -2 -10   0   29.43   13.92
 -12   3   0  246.68   30.75
   9 -12   0  245.84   31.76
 -12   3   0  222.50   24.66
  -9  12   0  218.43   29.27
  -3  -9   0  245.80   25.43
  -9  12   0  276.14   36.04
   8 -12   0   87.95   21.68
 -12   4   0  125.59   24.64
 -12   4   0   64.43   23.18
  -8  12   0   84.03   19.76
  -4  -8   0   66.84   16.95
  -8  12   0   78.12   26.43
 -12   5   0  150.40   27.02
   7 -12   0  116.83   21.50
 -12   5   0  125.02   21.32
  -7  12   0  188.01   29.99
  -5  -7   0  161.18   29.66
  -7  12   0  129.88   21.58
 -12   6   0  139.29   25.90
 -12   6   0  170.60   21.57
   6 -12   0  102.72   20.45
  -6  12   0  155.31   21.40
  -6  -6   0  130.92   17.98
   5 -12   0  116.45   20.64
 -12   7   0  127.01   21.05
 -12   7   0  111.74   27.17
  -5  12   0   91.77   24.90
  -7  -5   0  148.98   19.73
  -7  -5   0   99.28   21.73
  -5  12   0  146.62   19.18
 -12   8   0  102.50   21.62
   4 -12   0   80.51   19.28
 -12   8   0  100.60   27.92
  -8  -4   0   73.15   20.49
  -8  -4   0   91.97   21.61
 -12   9   0  228.03   31.65
   3 -12   0  208.09   27.17
 -12   9   0  277.72   31.68
  -9  -3   0  229.35   23.61
   2 -12   0   35.23   17.81
 -12  10   0   44.70   21.13
 -12  10   0   86.10   23.37
 -10  -2   0   57.43   12.88
 -12  11   0  -13.94   19.59
 -12  11   0    3.31   23.43
   1 -12   0   -6.44   16.01
 -11  -1   0   -6.42   10.97
 -12  12   0  116.01   26.38
 -12  12   0   89.52   29.43
   0 -12   0   99.86   21.32
 -12   0   0  117.39   17.62
 -13   1   0   -1.68   13.49
 -12  13   0  -30.71   21.97
  -1 -12   0   -7.77   14.99
 -12  13   0   -1.81   26.96
 -13   2   0  434.83   38.71
 -13   2   0  500.31   47.86
  -2 -11   0  458.83   43.15
 -11  13   0  535.64   48.87
 -13   3   0   13.74   12.86
 -13   3   0  -13.69   16.74
 -10  13   0   29.31   18.84
  -3 -10   0  -11.74   12.55
 -13   4   0   42.11   19.87
 -13   4   0    2.08   13.89
  -4  -9   0   -7.76   12.23
  -9  13   0   46.24   18.58
 -13   5   0  105.77   19.83
 -13   5   0   76.80   23.20
   8 -13   0   86.85   22.29
  -8  13   0   93.22   21.56
  -5  -8   0   82.87   15.88
 -13   6   0   30.49   14.59
 -13   6   0   34.33   20.61
   7 -13   0   58.55   20.38
  -7  13   0   22.35   16.09
  -6  -7   0   20.70   12.74
 -13   7   0   32.32   21.31
   6 -13   0    8.84   17.17
 -13   7   0    0.71   15.12
  -7  -6   0   35.00   12.65
 -13   8   0   82.10   24.74
   5 -13   0   92.60   20.67
 -13   8   0   71.94   21.45
  -8  -5   0   95.23   14.76
 -13   9   0   20.70   21.24
   4 -13   0    4.54   16.75
 -13   9   0   -7.07   16.56
  -9  -4   0   10.72   10.84
 -13  10   0   16.66   21.58
 -13  10   0    5.54   18.03
   3 -13   0  -14.24   17.64
 -10  -3   0   -2.24   10.62
 -13  11   0  554.83   55.53
   2 -13   0  457.17   46.66
 -13  11   0  520.09   54.08
 -11  -2   0  514.28   39.60
 -13  12   0  -13.95   20.10
   1 -13   0    6.79   18.03
 -13  12   0   27.38   22.08
 -12  -1   0    2.47   11.84
 -13  13   0   67.22   28.23
 -13  13   0    2.04   18.99
   0 -13   0   -1.69   16.68
 -13   0   0   -5.54   12.86
 -14   1   0   -3.91   12.45
  -1 -13   0  -14.35   17.27
 -13  14   0   40.81   28.63
 -14   2   0  -12.40   12.14
 -12  14   0   49.86   25.45
  -2 -12   0    6.75   16.83
 -14   3   0   93.62   23.42
 -14   3   0   69.32   16.44
  -3 -11   0   44.43   17.99
 -11  14   0   94.96   27.48
 -14   4   0   72.37   23.58
 -14   4   0   32.69   15.11
 -10  14   0  104.77   25.31
  -4 -10   0   48.39   16.71
 -14   5   0   10.09   14.52
 -14   5   0   68.22   22.53
  -5  -9   0    1.40   12.76
 -14   6   0   79.75   18.50
 -14   6   0   85.53   24.26
  -6  -8   0  117.99   18.10
 -14   7   0  152.02   28.81
   7 -14   0   57.57   40.77
 -14   7   0  150.89   23.18
  -7  -7   0  122.83   18.07
 -14   8   0  110.35   28.83
   6 -14   0   53.91   21.55
 -14   8   0  106.13   22.18
  -8  -6   0  117.69   16.70
   5 -14   0   31.51   18.79
 -14   9   0   52.02   25.32
 -14   9   0   20.08   19.87
  -9  -5   0   15.91   12.23
   4 -14   0   33.78   20.97
 -14  10   0   25.09   25.94
 -14  10   0   23.15   18.41
 -10  -4   0   45.70   13.10
 -14  11   0   40.02   20.21
   3 -14   0   71.96   22.70
 -14  11   0  110.86   31.42
 -11  -3   0   66.97   14.31
 -14  12   0   73.36   28.56
 -14  12   0  -16.93   18.39
   2 -14   0  -14.14   17.54
 -12  -2   0    2.02   12.60
 -14  13   0  -14.84   18.97
   1 -14   0   -1.00   17.77
 -14  13   0   32.49   27.43
 -13  -1   0    5.01   12.61
 -15   4   0    3.70   19.32
 -15   4   0   -0.64   14.48
  -4 -11   0   10.98   15.89
 -15   5   0    6.08   19.59
 -15   6   0   80.04   24.45
 -15   6   0  -19.04   14.42
  -6  -9   0    6.41   14.55
 -15   7   0   18.15   16.44
 -15   7   0   47.80   22.34
  -7  -8   0   19.66   13.26
 -15   8   0   17.17   21.20
 -15   8   0   -2.26   16.75
  -8  -7   0    9.46   12.95
 -15   9   0  -14.40   18.63
 -15   9   0  -12.89   22.28
   6 -15   0   -1.90   19.06
  -9  -6   0  -27.02   10.52
   5 -15   0    5.11   19.27
 -15  10   0   11.99   19.98
 -10  -5   0   16.69   11.90
 -15  11   0   48.24   26.99
   4 -15   0  -13.74   20.82
 -15  11   0    4.21   19.94
   0   1  -1    1.14    2.86
   1  -1  -1    7.12    3.53
   0   1  -1   12.29    3.14
  -1   0  -1   20.60    4.95
   1   0   1    5.49    3.16
   1   0   1    7.98    3.57
  -1   1   1   29.49    7.17
   1   0  -1   -1.66    3.58
   0  -1  -1   21.00    5.35
  -1   1  -1   10.11    4.10
   1  -1   1   12.11    4.08
  -1   2  -1   -2.18    5.43
  -1  -1  -1   -6.09    5.02
   2  -1  -1   10.92    4.98
  -1  -1  -1   -1.45    4.02
  -1   2  -1   -0.05    6.13
   2  -1  -1    4.09    7.73
   2  -1  -1    1.39    5.16
  -1   2  -1   -0.05    6.84
   1  -2   1   -4.61    6.40
   1   1   1   -2.29    5.03
  -2   1   1    1.52    5.01
   1   1   1    2.58    3.60
  -2   1   1    4.01    6.73
  -2   1   1  -15.23    7.31
   1  -2   1    0.34    6.24
   1  -2   1    3.78    6.05
   3  -2  -1  111.77   11.96
   3  -2  -1  120.77   14.37
  -2  -1  -1  110.59   10.72
  -1   3  -1  111.18   11.19
  -2  -1  -1  114.93   11.20
  -2  -1  -1  131.40   11.77
  -1   3  -1  105.85   11.76
   3  -2  -1  100.46   11.39
   2   1   1  112.69   11.00
   2   1   1  127.87   12.48
   1  -3   1  108.31   11.44
  -3   2   1   96.57   13.70
  -3   2   1  123.45   12.51
   1  -3   1  119.08   12.58
   1  -3   1   98.30   10.66
   2   1   1  122.10   11.18
   2  -2  -1   13.29    7.97
  -2   0  -1   23.07    5.93
   0   2  -1   22.18    5.90
   2  -2  -1   15.55    5.64
   0   2  -1   27.10    6.81
   0   2  -1   16.60    4.64
  -2   0  -1   21.48    7.49
   2  -2  -1   28.50    7.48
  -2   2   1   28.36    6.37
  -2   2   1   23.69    8.32
   2   0   1   30.73    7.10
   0  -2   1   28.05    4.92
  -2   2   1    6.65    8.10
   2   0   1   21.08    6.04
   0  -2   1   12.95    5.95
   2   0   1   30.05    5.95
   1   1  -1   -2.78    3.89
   1  -2  -1    0.48    6.31
   1  -2  -1   -4.30    5.55
  -2   1  -1   10.77    8.23
   1   1  -1    0.75    3.86
  -2   1  -1    0.67    4.78
   1  -2  -1    0.71    6.05
   1   1  -1   -9.04    4.20
  -2   1  -1   -3.67    6.14
  -1   2   1   -2.18    6.09
  -1   2   1    8.48    5.65
  -1  -1   1    2.09    4.31
   2  -1   1   -4.54    6.59
   2  -1   1    0.28    6.56
   2  -1   1    3.95    6.36
  -1   2   1   -5.35    6.67
   2   0  -1   13.19    4.74
   2   0  -1   29.86    4.92
   0  -2  -1   21.91    3.79
  -2   2  -1   21.99    8.16
  -2   2  -1   17.00    5.86
   0  -2  -1    9.18    6.42
   0  -2  -1   38.23    7.88
   2   0  -1   26.29    7.41
  -2   2  -1   35.95    9.01
   0   2   1   -0.19    6.60
  -2   0   1   11.65    8.21
  -2   0   1   31.79    5.32
   0   2   1   29.59    3.71
   2  -2   1   15.26    7.35
   2  -2   1   21.28    7.83
  -2   0   1   17.36    5.24
   2  -2   1   33.29    9.03
   0   2   1    0.70    6.11
  -2   3  -1   76.17   10.71
  -2   3  -1  105.80   12.62
  -1  -2  -1  124.90   11.85
   3  -1  -1  118.33   10.70
  -2   3  -1   99.27   11.34
   3  -1  -1  129.74   12.43
   3  -1  -1   87.70   12.19
  -3   1   1   93.77    9.83
   1   2   1  104.63   10.54
  -3   1   1  118.19   11.40
   2  -3   1  120.78   12.80
   1   2   1  124.81   11.62
   2  -3   1   84.16   10.61
  -3   1   1  107.88   12.86
   4  -2  -1   -6.82    7.65
  -2  -2  -1    0.86    5.09
  -2  -2  -1   16.65    7.13
  -2   4  -1   -0.80    8.16
   4  -2  -1   -2.23   10.14
  -2   4  -1   14.98    9.79
  -2  -2  -1    7.25    7.80
   4  -2  -1    1.76    7.49
  -2   4  -1    6.49    6.24
   2  -4   1    5.70    8.61
   2  -4   1   12.46    8.77
   2   2   1   -1.76    7.00
   2  -4   1    2.16    6.24
  -4   2   1  -12.75   11.71
   2   2   1  -16.41    4.87
  -4   2   1    6.75    8.77
  -4   2   1   -5.03    6.93
   2   2   1    7.20    7.31
  -3  -2  -1   61.75    9.55
   5  -3  -1   92.38   12.09
   5  -3  -1  112.44   15.88
  -3  -2  -1   83.58    9.10
  -2   5  -1   63.22   10.42
  -3  -2  -1   68.83    9.75
  -2   5  -1   84.56   12.20
   5  -3  -1   82.52   12.19
  -2   5  -1   78.37   12.40
   3   2   1   72.07    9.66
   2  -5   1   57.65   10.74
   3   2   1   74.15    8.97
  -5   3   1   76.58   10.76
   2  -5   1  118.31   14.59
  -5   3   1   53.29   13.35
   2  -5   1   65.66   10.46
   3   2   1   62.48    9.38
   4  -3  -1   72.59   11.06
  -3  -1  -1   69.16   10.38
   4  -3  -1   68.89   14.02
  -1   4  -1   85.51    9.50
   4  -3  -1   58.23    8.99
  -1   4  -1   75.63   11.04
  -3  -1  -1   67.55    9.53
  -3  -1  -1   80.98   10.05
  -1   4  -1  103.90   12.92
  -4   3   1   87.41   12.28
   1  -4   1   93.16    9.75
   1  -4   1   48.44    9.20
   3   1   1   57.67    8.81
  -4   3   1   74.09    9.92
  -4   3   1   53.33   13.03
   3   1   1   80.09   10.24
   1  -4   1   68.50   10.48
   3   1   1   63.53    9.38
   3  -3  -1  122.94   15.09
   3  -3  -1  120.84   12.84
   0   3  -1  160.17   12.12
  -3   0  -1  151.71   13.95
   0   3  -1  104.55   12.10
  -3   0  -1  156.34   14.83
   3  -3  -1  178.26   16.57
   0   3  -1  156.10   15.37
  -3   0  -1  188.46   15.36
  -3   3   1  149.53   14.97
   3   0   1  134.33   14.40
  -3   3   1  153.05   16.37
   3   0   1  155.42   14.75
  -3   3   1  120.26   13.18
   3   0   1  140.63   14.24
   0  -3   1  149.12   12.08
   0  -3   1  146.28   14.03
   1   2  -1  133.03   11.85
   2  -3  -1   90.84   12.49
   1   2  -1   87.01    9.50
  -3   1  -1  113.91   11.09
   2  -3  -1   96.99   12.32
   2  -3  -1  118.08   13.13
   1   2  -1  106.54    9.67
  -3   1  -1  125.56   13.43
   1   2  -1  103.20   10.14
   3  -1   1  110.43   13.06
   3  -1   1  125.61   11.80
  -2   3   1  105.57   12.63
  -2   3   1  114.74   13.09
  -1  -2   1  112.41   10.23
  -1  -2   1  107.44   10.32
  -2   3   1   97.55   12.54
   2   1  -1  104.86    9.19
   1  -3  -1  106.33   11.57
  -3   2  -1   93.20   11.80
   1  -3  -1  104.95   10.39
   1  -3  -1  127.07   13.24
  -3   2  -1   87.77   12.53
  -3   2  -1   96.05   11.72
   2   1  -1  100.61   10.14
   2   1  -1   98.44   10.30
  -2  -1   1  102.50   10.64
  -1   3   1   78.50   10.46
   3  -2   1   90.45   11.19
   3  -2   1  120.94   13.30
  -1   3   1  106.36   10.20
  -1   3   1  102.55   12.21
  -2  -1   1  101.92   10.39
   3  -2   1   97.63   10.67
  -2  -1   1  112.22   10.45
  -3   3  -1  141.64   15.13
   0  -3  -1  137.22   13.76
   3   0  -1  145.54   14.29
   0  -3  -1  160.55   14.75
   3   0  -1  161.18   13.53
  -3   3  -1  125.87   15.42
   0  -3  -1  145.08   10.75
   3   0  -1  145.88   13.39
  -3   3  -1  138.19   14.15
   3  -3   1  170.09   16.32
   0   3   1  136.52   14.20
  -3   0   1  171.01   15.73
   0   3   1  156.96   14.68
  -3   0   1  123.22   13.36
   3  -3   1  144.79   14.15
   0   3   1  144.96   10.70
  -3   0   1  167.88   13.57
   3  -3   1  152.12   16.44
  -3   4  -1   82.40   12.20
   4  -1  -1   76.44    9.36
  -3   4  -1   75.60   11.72
   4  -1  -1   52.73   11.72
  -3   4  -1   69.91   12.17
   4  -1  -1   73.68    8.99
  -1  -3  -1   70.19   10.32
  -4   1   1   57.24    8.83
  -4   1   1   66.69    8.86
   3  -4   1   56.17   12.18
   1   3   1   77.76   10.75
   3  -4   1   62.60   11.22
   1   3   1   76.32   10.07
  -4   1   1   80.09   12.98
   3  -4   1   51.49    9.61
  -2  -3  -1   66.30   10.39
  -3   5  -1   63.72   12.64
   5  -2  -1  103.76   11.42
   5  -2  -1   75.34   14.50
   5  -2  -1   64.63    9.44
  -3   5  -1   66.93   12.12
  -3   5  -1   70.36   12.40
  -2  -3  -1   90.03   11.67
   2   3   1   87.48   10.66
   3  -5   1  103.60   13.33
   2   3   1   86.43   10.48
   3  -5   1   97.28   13.61
  -5   2   1   84.83   10.64
  -5   2   1   92.59   14.85
   3  -5   1   85.07   13.22
  -5   2   1   84.87   12.00
  -3   6  -1    1.61    9.52
  -3   6  -1   -1.25    9.44
   6  -3  -1   -0.24    8.01
  -3  -3  -1   -1.23    4.59
  -3  -3  -1    1.50    7.22
   6  -3  -1   16.38   15.80
  -3   6  -1   -1.79    7.76
  -6   3   1    4.24    8.55
  -6   3   1   -7.31    7.79
   3   3   1   -4.12    4.90
   3  -6   1  -19.46    8.76
   3   3   1    2.30    7.69
   3   3   1    2.58    7.87
  -6   3   1  -14.84   11.86
   3  -6   1    2.75   10.61
   3  -6   1   -0.78    8.67
  -3   7  -1   -3.21    9.74
  -4  -3  -1   15.49    8.61
   7  -4  -1   22.35   14.13
   7  -4  -1   -6.77    7.24
   7  -4  -1   13.73   11.06
  -3   7  -1   14.41   11.11
  -3   7  -1    4.14    9.97
  -4  -3  -1    2.38    6.05
  -4  -3  -1   10.00    8.45
  -7   4   1   -4.54   12.98
   3  -7   1    1.35    9.34
   4   3   1   25.20    8.53
   3  -7   1    2.27   11.18
   4   3   1    5.68    8.57
   3  -7   1   20.11   10.96
  -7   4   1   21.64   14.46
   4   3   1   -0.08    6.58
  -2   6  -1   11.73    9.92
  -4  -2  -1    8.92    7.69
   6  -4  -1    9.35    8.95
  -4  -2  -1   -0.43    7.71
  -4  -2  -1    4.47    7.70
  -2   6  -1   -4.64    7.87
   6  -4  -1   -1.85   12.78
   6  -4  -1    8.45    7.77
  -2   6  -1   11.75    8.49
  -6   4   1   -6.66   13.22
   2  -6   1    6.21    8.02
  -6   4   1   -6.10    8.26
   4   2   1   -7.89    7.88
   2  -6   1   -0.12    9.42
   4   2   1    3.91    6.91
   4   2   1    4.78    7.24
  -6   4   1    7.25    7.98
   2  -6   1    4.16    9.18
   5  -4  -1   13.68    8.99
  -4  -1  -1    7.94    7.47
  -1   5  -1    3.60    8.00
  -1   5  -1   17.72    9.71
  -4  -1  -1    7.12    6.64
   5  -4  -1   13.15    9.93
  -1   5  -1   11.03    6.92
  -4  -1  -1   13.00    8.52
   5  -4  -1   14.97   12.64
  -5   4   1   10.02    8.99
  -5   4   1    5.40   10.18
   4   1   1   -5.18    8.18
   1  -5   1    3.50    7.76
   4   1   1    9.21    7.41
   1  -5   1   12.25    8.02
   1  -5   1   21.12    6.92
  -5   4   1    2.42   12.01
   4   1   1   14.79    6.90
   0   4  -1   43.25    5.77
   0   4  -1   23.54    7.39
   0   4  -1   36.36    8.58
  -4   0  -1   27.78    7.47
   4  -4  -1   19.37    8.65
  -4   0  -1   43.70    8.49
  -4   0  -1   36.97   10.33
   4  -4  -1   37.60   12.44
   4  -4  -1   54.38   11.18
   4   0   1   31.10    9.48
   4   0   1   32.98    7.53
  -4   4   1   29.74    9.81
   0  -4   1   31.71    5.44
   0  -4   1   31.52    9.99
  -4   4   1   45.45   11.06
   4   0   1   58.62    9.35
  -4   4   1   27.37   11.71
   3  -4  -1   78.74   12.31
   3  -4  -1   80.18   11.99
   1   3  -1   72.69    6.55
  -4   1  -1   76.30    9.52
  -4   1  -1   51.30   11.67
   1   3  -1   75.81    9.34
  -4   1  -1   59.08    9.10
   3  -4  -1   91.48   13.28
   1   3  -1   88.25    9.47
   1   3  -1   74.52    7.47
   4  -1   1   74.94    9.36
   4  -1   1   58.58    9.53
  -1  -3   1   71.84    9.54
  -3   4   1   63.88   11.99
  -1  -3   1   58.21    8.94
   4  -1   1   71.11   12.46
  -3   4   1   93.75   12.67
  -3   4   1   73.92   12.14
   2  -4  -1    6.30    7.86
   2   2  -1   10.66    6.34
   2   2  -1    0.89    5.79
  -4   2  -1    3.54   11.58
   2   2  -1    0.55    6.22
  -4   2  -1   15.20    8.67
   2  -4  -1   14.49    9.81
   2  -4  -1    4.58    8.81
  -2   4   1    2.92    8.87
  -2  -2   1    8.40    5.99
  -2   4   1   -1.05    8.63
   4  -2   1   21.42   11.83
   4  -2   1   -3.79    8.50
   4  -2   1    8.46    7.59
  -2   4   1   11.63    9.33
  -4   3  -1   52.50   10.95
   1  -4  -1   81.24    9.06
   3   1  -1   61.35    7.92
  -4   3  -1   60.93   13.61
   3   1  -1   78.73    8.36
   1  -4  -1   80.69   11.21
   1  -4  -1   54.83    9.53
  -4   3  -1   57.03    9.85
   3   1  -1   75.85    9.62
   4  -3   1   75.90   11.99
   4  -3   1   68.09   10.93
  -3  -1   1   73.42    8.59
  -3  -1   1   66.68    8.04
  -3  -1   1   52.85    9.68
  -1   4   1   94.53   12.02
   4  -3   1   62.41   12.74
  -1   4   1   40.82    9.81
  -1   4   1   69.27    8.59
  -4   4  -1   26.27   11.21
   0  -4  -1   29.27    4.18
   4   0  -1   32.87   10.18
  -4   4  -1   40.50   10.00
   4   0  -1   41.97    7.13
  -4   4  -1   44.35   11.53
   0  -4  -1   42.77    8.95
   4   0  -1   33.73    7.65
   0  -4  -1   35.94    8.67
  -4   0   1   56.54    8.05
   0   4   1   38.69    9.33
   4  -4   1   23.49    8.74
  -4   0   1   23.46   10.05
   4  -4   1   20.31    9.70
   0   4   1   16.10    8.79
  -4   0   1   45.83    7.70
   4  -4   1   43.66   12.26
  -1  -4  -1   10.41    8.35
  -4   5  -1   22.50   10.81
  -4   5  -1   -0.78   10.65
   5  -1  -1   10.02    6.98
  -4   5  -1    9.37    9.49
   5  -1  -1   15.33    7.16
   5  -1  -1   19.63   10.30
  -5   1   1    8.99    6.99
  -5   1   1   13.21    7.28
   4  -5   1    9.34    6.80
  -5   1   1   16.33   10.93
   4  -5   1   19.76   10.24
   1   4   1   12.25    8.01
   1   4   1    8.97    8.39
   4  -5   1    4.85   10.84
   6  -2  -1    1.21    8.22
  -4   6  -1    6.39    9.78
  -4   6  -1   15.20   11.30
  -4   6  -1    0.57   11.48
   6  -2  -1    9.76    8.00
  -2  -4  -1   -1.97    7.92
  -2  -4  -1    4.09    7.92
   6  -2  -1  -11.77   11.16
   2   4   1    0.54    7.68
  -6   2   1   -9.53    7.15
  -6   2   1    4.75   11.53
   2   4   1    1.45    7.38
   4  -6   1   10.74   11.86
  -6   2   1    2.49    7.11
   4  -6   1   -9.29   10.12
   4  -6   1    2.40    9.78
   7  -3  -1    4.89    9.04
  -4   7  -1    5.33   10.98
  -4   7  -1    4.75   11.13
  -3  -4  -1   22.17    9.36
   7  -3  -1    0.06    7.64
   7  -3  -1   28.21   14.47
  -3  -4  -1    5.27    8.21
  -4   7  -1   10.42   11.15
   3   4   1   14.53    8.87
  -7   3   1    2.10    8.36
  -7   3   1   22.48   10.27
   3   4   1   14.26    8.07
   4  -7   1   24.70   10.48
   4  -7   1    7.60   11.47
   4  -7   1   13.69   11.42
  -4  -4  -1   -1.20    8.47
   8  -4  -1   13.94    9.79
  -4   8  -1  -14.05   11.51
  -4   8  -1   17.51   12.39
  -4  -4  -1    0.07    8.88
  -4   8  -1   -1.50   11.81
   8  -4  -1   -1.98    8.23
   8  -4  -1   22.27   15.38
  -8   4   1   -5.37    9.24
  -8   4   1  -18.17   14.05
   4  -8   1   13.06   12.23
   4   4   1   10.39    4.94
  -8   4   1    1.09    9.08
   4  -8   1   -1.75   10.56
   4   4   1   -6.94    8.03
   4   4   1  -12.25    7.74
   4  -8   1  -17.84   11.38
   9  -5  -1   30.07   12.39
  -5  -4  -1   22.24   10.36
   9  -5  -1   28.24   17.23
  -4   9  -1   40.62   13.29
  -4   9  -1   45.94   13.41
  -4   9  -1   24.18   14.49
  -5  -4  -1   15.42    9.65
   9  -5  -1   -7.28    9.88
  -9   5   1    3.04   16.75
   4  -9   1   -2.41    9.49
   5   4   1   24.26   10.03
  -9   5   1   24.61   12.56
   5   4   1   26.17    9.94
   4  -9   1   26.36   15.20
  -9   5   1   32.06   11.03
   5   4   1   24.96    7.04
  -3   8  -1   -9.17   10.03
   8  -5  -1  -12.30   13.92
  -5  -3  -1  -12.20    8.35
  -5  -3  -1    4.53    9.20
   8  -5  -1   -0.28    9.73
  -5  -3  -1    2.16    6.98
   8  -5  -1  -16.62    9.62
  -3   8  -1  -25.84    9.92
  -3   8  -1   17.01   12.58
   5   3   1    1.12    8.08
   3  -8   1    2.07   10.19
  -8   5   1    9.39   16.73
   5   3   1   -4.84    8.55
   5   3   1   -8.44    8.31
   3  -8   1    2.53   15.95
  -8   5   1   17.71   11.05
   3  -8   1    2.34   12.67
  -5  -2  -1   20.18    9.22
  -5  -2  -1   15.50    9.08
   7  -5  -1   18.37   11.22
  -2   7  -1    7.11   10.61
  -5  -2  -1   19.80    8.49
   7  -5  -1   25.83   10.78
   7  -5  -1   17.02   14.44
  -2   7  -1   33.86   10.26
  -2   7  -1   10.85    8.74
   5   2   1   21.69    8.90
   2  -7   1    4.60    8.53
  -7   5   1  -17.53   12.69
   2  -7   1   17.05   13.95
  -7   5   1   15.06   10.71
  -7   5   1   21.52   11.91
   5   2   1   16.67    9.48
   2  -7   1   25.16    8.80
   5   2   1   20.31    8.49
  -1   6  -1    8.02    8.42
   6  -5  -1   14.80   10.63
   6  -5  -1   -7.60   12.68
  -1   6  -1    3.75    6.59
  -5  -1  -1    8.84    9.54
   6  -5  -1    9.40    9.93
  -1   6  -1    1.91    8.96
  -5  -1  -1    3.56    7.53
  -5  -1  -1    7.16    8.18
   5   1   1    7.24    8.36
   1  -6   1   21.29   10.70
  -6   5   1   -5.48   11.84
   1  -6   1   20.27    9.83
  -6   5   1   20.77    8.43
   5   1   1   14.02    7.50
   1  -6   1    5.44    6.40
  -6   5   1   21.71   11.31
   5   1   1   -5.94    9.41
  -5   0  -1   80.89   11.15
  -5   0  -1   92.41   13.31
  -5   0  -1   89.43   11.64
   0   5  -1   98.03   12.79
   0   5  -1   90.74    9.51
   5  -5  -1   73.33   14.99
   5  -5  -1  120.28   15.01
   5  -5  -1   89.22   14.53
   0   5  -1   83.67   11.69
  -5   5   1   52.07    9.77
   5   0   1   82.73   12.74
   5   0   1   80.80   11.81
  -5   5   1   56.22   12.54
   0  -5   1  116.54   13.05
   0  -5   1   91.34    8.94
   5   0   1   98.16   11.35
  -5   5   1   94.49   15.15
  -5   1  -1   15.80    7.74
   4  -5  -1    9.42    7.55
   1   4  -1    4.14    7.18
  -5   1  -1   12.04    7.83
   4  -5  -1    4.08   11.03
   1   4  -1   21.06    7.74
  -5   1  -1   17.61   12.10
   4  -5  -1   -0.81    9.98
  -4   5   1    6.70   11.07
  -4   5   1    9.33    9.68
  -1  -4   1    8.68    7.90
  -4   5   1   12.25   10.43
  -1  -4   1   10.03    7.71
   5  -1   1    2.96    7.09
   5  -1   1   11.05    7.20
   5  -1   1    1.46   10.19
  -5   2  -1   93.74   15.83
   3  -5  -1   68.03   12.01
   3  -5  -1   93.35   14.45
   2   3  -1   96.87    9.57
   3  -5  -1   93.47   12.23
   2   3  -1  106.73   10.53
   2   3  -1   77.96    9.83
   2   3  -1   76.72    7.56
  -5   2  -1   93.68   11.10
  -3   5   1   84.90   13.18
  -2  -3   1   90.24   10.26
  -3   5   1   72.84   11.97
  -3   5   1   81.89   12.87
   5  -2   1   78.10   12.42
  -2  -3   1   64.54    9.35
   5  -2   1   62.28   13.51
   5  -2   1   77.81   11.49
   2  -5  -1   94.75   11.37
   3   2  -1   73.08    9.28
  -5   3  -1   81.49   11.76
   3   2  -1   73.72    9.16
   2  -5  -1   95.08   13.06
  -5   3  -1   40.22   13.42
   2  -5  -1   75.08   12.41
   3   2  -1   76.46    9.17
  -5   3  -1  107.31   13.22
  -2   5   1   63.93   11.62
  -3  -2   1   73.80    8.83
  -3  -2   1   78.48    9.31
   5  -3   1   75.08   12.27
  -3  -2   1   71.94    9.22
   5  -3   1   87.93   11.77
  -2   5   1   84.66   11.22
  -2   5   1   69.19   12.60
   5  -3   1   71.15   13.84
   1  -5  -1   14.83    6.29
   1  -5  -1   15.99    8.82
   4   1  -1    1.59    7.61
  -5   4  -1    0.08    9.33
  -5   4  -1    2.86    7.89
   4   1  -1    8.15    5.95
   4   1  -1    9.40    6.68
  -5   4  -1    2.03   12.30
   1  -5  -1   19.46    9.95
  -4  -1   1   12.50    6.49
   5  -4   1   -1.64   11.48
  -4  -1   1    2.51    6.36
   5  -4   1   11.69    9.68
   5  -4   1    4.08    8.19
  -1   5   1    6.85    8.66
  -1   5   1   11.38    9.66
  -4  -1   1   10.55    8.53
  -1   5   1    6.90    6.13
  -5   5  -1   60.51   14.72
  -5   5  -1   94.87   14.64
   0  -5  -1   77.78   12.04
   0  -5  -1   73.76   11.75
   5   0  -1   91.92   13.53
   5   0  -1   98.00   10.58
  -5   5  -1   64.27   12.17
   5  -5   1  105.23   16.20
   5  -5   1  104.22   13.15
  -5   0   1   83.47   13.41
  -5   0   1  104.36   10.63
   5  -5   1  136.32   15.79
  -5   0   1   66.47    9.77
   0   5   1   75.27   10.93
  -1  -5  -1    8.75    9.08
   6  -1  -1   14.34    7.72
  -5   6  -1   -6.03   10.37
  -5   6  -1   18.03   12.03
  -1  -5  -1   10.52   10.55
  -5   6  -1   11.41   11.55
   6  -1  -1    5.59    7.15
   6  -1  -1    5.42   11.46
   1   5   1    6.23    7.81
  -6   1   1    5.97    8.01
   1   5   1    8.42    8.84
  -6   1   1   12.62    7.97
   5  -6   1   26.57   12.70
  -6   1   1   16.32   12.41
   5  -6   1   15.64   11.66
   7  -2  -1   18.64    8.88
  -5   7  -1   13.82   11.60
   7  -2  -1   37.07    9.74
   7  -2  -1   23.67   14.82
  -5   7  -1    7.92    9.76
  -2  -5  -1   12.80    9.93
  -2  -5  -1   14.24    9.78
  -5   7  -1   12.75   13.51
   2   5   1   24.78    9.86
   5  -7   1    2.94   12.92
  -7   2   1   12.96   13.71
  -7   2   1    7.78    8.13
   5  -7   1   17.44   12.28
   5  -7   1   27.34   13.32
   2   5   1   -2.83    8.47
  -7   2   1   19.67    9.15
  -5   8  -1    0.09   12.20
  -5   8  -1    3.74   13.35
   8  -3  -1    2.00    9.57
  -3  -5  -1   -4.17    7.41
  -5   8  -1   17.22   10.25
   8  -3  -1    0.75    8.88
   8  -3  -1   -6.56   14.64
  -3  -5  -1   -4.04    9.66
  -8   3   1   -2.30   14.80
   5  -8   1   -1.98   11.80
   3   5   1   -4.37    8.89
   3   5   1    1.30    9.16
   5  -8   1   -2.00    8.34
  -8   3   1   -2.87    8.24
   5  -8   1   12.64   12.91
  -8   3   1   -5.44    9.11
   9  -4  -1   47.19   13.11
   9  -4  -1   30.00   10.67
  -4  -5  -1   15.80   10.09
  -5   9  -1   26.95   12.89
  -5   9  -1   15.34   15.37
   9  -4  -1   10.49   16.73
  -4  -5  -1   12.48    9.51
  -5   9  -1   14.12   14.00
   5  -9   1   30.89   15.24
   5  -9   1   23.17   12.59
  -9   4   1   38.57   17.47
   5  -9   1   24.05   13.52
   4   5   1   31.61   10.96
  -9   4   1   39.31   12.06
   4   5   1    7.67    9.24
  -9   4   1   15.87   11.59
  -5  10  -1   17.24   13.40
  -5  10  -1   10.00   10.66
  10  -5  -1   10.87   11.44
  -5  -5  -1   -8.92    9.55
  10  -5  -1  -20.96   17.56
  10  -5  -1    6.41   12.19
  -5  -5  -1    6.34    9.60
  -5  10  -1   -0.03   14.66
   5 -10   1    3.07    9.64
   5   5   1    6.04    9.37
   5   5   1  -10.71   10.01
 -10   5   1   -9.90   11.39
   5 -10   1   -2.13   13.07
 -10   5   1   16.21   16.95
   5 -10   1   18.72   15.70
 -10   5   1   11.83   11.49
  -5  11  -1   43.57   17.84
  -5  11  -1   20.46   16.56
  -6  -5  -1   58.61   13.27
  -6  -5  -1   77.86   14.50
  -5  11  -1   75.47   15.75
 -11   6   1   62.37   16.85
   5 -11   1   58.17   21.39
 -11   6   1   70.01   20.93
   5 -11   1  117.97   22.32
  -6  -4  -1   20.05   10.78
  -4  10  -1    9.85   13.07
  -4  10  -1   42.25   12.43
  10  -6  -1   28.48   14.96
  -4  10  -1   33.27   16.74
  -6  -4  -1   20.36   10.81
  10  -6  -1   19.43   20.16
   4 -10   1   23.18   10.79
   6   4   1   28.33    8.24
   6   4   1   27.91   10.59
 -10   6   1   60.08   18.11
 -10   6   1   27.56   13.30
   4 -10   1   62.50   15.36
   6   4   1    1.26   10.71
   4 -10   1   25.55   13.07
  -3   9  -1   58.54   12.16
  -6  -3  -1   85.71   11.44
   9  -6  -1   48.10   12.39
   9  -6  -1   90.45   15.59
  -6  -3  -1   60.99   11.74
  -6  -3  -1   86.00   12.57
   9  -6  -1   41.61   17.60
  -3   9  -1   88.06   16.65
  -3   9  -1   84.99   13.59
  -9   6   1   85.36   21.35
   6   3   1   65.21   12.46
   6   3   1   91.91   13.22
  -9   6   1   77.18   15.60
   6   3   1   79.06   12.08
   3  -9   1   59.84   12.95
  -9   6   1   60.10   14.83
   3  -9   1   84.99   15.31
   3  -9   1   67.14   15.41
  -2   8  -1   60.35   13.05
   8  -6  -1   38.46   17.00
   8  -6  -1   82.35   15.99
  -6  -2  -1   45.30   11.53
  -6  -2  -1   44.86   10.88
   8  -6  -1   65.50   15.42
  -6  -2  -1   51.06   10.39
  -2   8  -1   52.29   10.52
  -2   8  -1   49.10   13.10
   6   2   1   58.30   12.51
  -8   6   1   69.85   14.71
  -8   6   1   58.27   17.52
   2  -8   1   53.37   15.50
   6   2   1   36.84   11.14
   2  -8   1   40.07    9.90
  -8   6   1   28.99   11.47
   6   2   1   73.88   11.21
   2  -8   1   55.82   13.55
   7  -6  -1    0.81   10.97
  -6  -1  -1    7.33   10.65
   7  -6  -1    7.32   11.07
  -6  -1  -1   17.84    8.59
   7  -6  -1   15.93   14.68
  -1   7  -1   11.68    7.25
  -1   7  -1   17.11   12.16
  -1   7  -1    6.48    9.75
  -6  -1  -1    8.15    8.55
   1  -7   1   12.18    9.04
  -7   6   1    2.74    8.75
   1  -7   1   23.66   13.13
   6   1   1    9.01    8.29
   6   1   1   18.47   11.63
   1  -7   1   16.93    6.77
   6   1   1   12.95    8.38
  -7   6   1   16.61   11.41
  -7   6   1   22.19   15.58
   6  -6  -1   77.58   16.06
  -6   0  -1  102.92   15.27
   6  -6  -1  127.11   17.41
   0   6  -1   94.59   13.71
   6  -6  -1   93.67   14.16
   0   6  -1   83.29    7.89
   0   6  -1   69.95   11.98
  -6   0  -1   73.07   11.28
  -6   0  -1  102.91   12.71
   6   0   1  141.11   16.62
  -6   6   1   70.44   17.41
  -6   6   1   65.70   11.53
   6   0   1   93.31   13.01
   6   0   1   76.33   10.97
   0  -6   1   80.00   13.60
  -6   6   1  120.32   15.71
   5  -6  -1    3.68   11.58
  -6   1  -1    7.99   11.92
   5  -6  -1   11.45    9.88
  -6   1  -1    6.69    8.72
   1   5  -1    5.95    7.80
   5  -6  -1   16.21   13.75
  -6   1  -1    5.58    7.83
   1   5  -1    1.43    7.57
  -5   6   1   -2.88    7.33
  -5   6   1   -9.35   12.19
  -1  -5   1   -2.63    7.67
   6  -1   1   11.87   11.21
   6  -1   1    9.13    8.35
  -5   6   1   13.97   12.18
  -1  -5   1    9.74    9.33
   6  -1   1   14.41    7.92
   4  -6  -1   16.30   11.83
   2   4  -1   -0.29    6.79
   4  -6  -1   -0.51    8.66
   4  -6  -1    0.83    9.79
  -6   2  -1    4.51    8.05
   2   4  -1    5.14    7.35
  -6   2  -1    1.46    7.38
  -6   2  -1   12.20   12.54
  -2  -4   1   -1.43    8.37
  -4   6   1  -10.67   10.05
   6  -2   1   12.89   11.30
   6  -2   1    3.24    7.20
  -4   6   1    7.52   10.37
  -4   6   1   17.37    8.44
   6  -2   1    7.50    9.26
  -2  -4   1   -9.74    6.91
   3  -6  -1    7.42    7.78
   3  -6  -1   -0.07    9.69
  -6   3  -1  -21.04   12.44
   3  -6  -1   -3.15    8.85
  -6   3  -1    2.07    8.99
   3   3  -1    3.41    6.63
   3   3  -1   -1.07    5.57
   3   3  -1   -4.01    6.51
  -3   6   1   16.80    9.83
   6  -3   1    0.52    8.54
  -3   6   1   -4.70    8.50
  -3  -3   1    2.37    6.89
   6  -3   1   -2.35    7.96
  -3  -3   1   -2.37    6.62
  -3   6   1   15.40    9.87
  -6   4  -1   12.10   12.95
   2  -6  -1   13.64    8.37
   2  -6  -1    8.90   10.22
   4   2  -1    1.22    6.70
   4   2  -1    2.80    7.88
  -6   4  -1   -4.67    6.74
   4   2  -1    9.00    6.70
  -6   4  -1   10.10    9.10
   2  -6  -1   18.93    9.25
  -4  -2   1   -2.77    7.43
   6  -4   1   -4.74    9.35
   6  -4   1    5.16   12.80
  -4  -2   1    1.89    6.92
  -2   6   1   -8.98   10.20
  -4  -2   1   16.73    7.27
  -2   6   1    8.22    8.16
   6  -4   1   17.27   10.76
  -2   6   1    5.70    9.08
  -6   5  -1   21.11    8.57
   1  -6  -1    6.34    6.00
   5   1  -1   14.08    7.23
   1  -6  -1    3.56    8.70
   5   1  -1   -6.47    9.16
  -6   5  -1    9.16   13.20
   5   1  -1   17.39    6.65
   1  -6  -1   -1.06   10.70
  -6   5  -1   29.35   10.30
   6  -5   1   26.60   11.90
  -5  -1   1   19.64    7.40
  -1   6   1   25.91   10.49
  -5  -1   1    5.31    6.79
  -1   6   1   19.71    9.69
  -1   6   1    7.36    6.25
   6  -5   1   10.88   13.45
   6  -5   1    5.17    9.93
  -5  -1   1    2.90    9.22
   0  -6  -1   94.50   15.65
  -6   6  -1   74.77   17.09
   6   0  -1   88.08   15.45
   6   0  -1  119.73   12.24
   6   0  -1   83.68   10.88
   0  -6  -1   91.29   13.87
  -6   6  -1   86.14   14.50
  -6   6  -1  103.67   15.43
   6  -6   1  105.26   17.39
  -6   0   1   75.05   10.79
   0   6   1   62.99   12.51
   6  -6   1   84.61   14.99
  -6   0   1   76.99   14.45
   0   6   1   86.42   13.78
  -6   0   1   93.20   11.02
   6  -6   1  112.80   16.49
   7  -1  -1   30.49    8.62
  -1  -6  -1    4.00    9.70
  -6   7  -1   17.86   11.42
   7  -1  -1   23.30   13.78
  -6   7  -1    2.51   12.31
  -1  -6  -1    6.94   10.01
   7  -1  -1   24.51    9.42
  -6   7  -1    3.02   14.38
   1   6   1   28.83    9.92
   6  -7   1   34.21   14.33
   6  -7   1   20.00   11.18
  -7   1   1    8.57    9.04
   6  -7   1    5.51   14.68
   1   6   1   16.91    9.41
  -7   1   1   -4.31   12.95
  -7   1   1   23.00    9.14
  -6   8  -1   47.74   13.26
  -2  -6  -1   53.29   11.93
   8  -2  -1   45.34   16.41
   8  -2  -1   41.79   10.93
  -6   8  -1   50.95   14.68
  -2  -6  -1   33.95   11.23
  -6   8  -1   43.88   16.02
   8  -2  -1   53.85   11.15
   6  -8   1   44.03   10.62
   6  -8   1   67.09   17.15
  -8   2   1   60.77   11.66
  -8   2   1   55.09   16.52
   2   6   1   44.52   11.18
   2   6   1   33.30   12.13
   6  -8   1   43.24   16.07
  -8   2   1   51.81   10.64
   9  -3  -1   77.34   13.05
  -3  -6  -1  105.13   14.28
  -6   9  -1   55.02   15.35
  -3  -6  -1   79.90   13.56
   9  -3  -1   61.23   12.85
  -6   9  -1  101.11   18.63
   9  -3  -1  104.97   20.90
  -6   9  -1   65.38   14.49
  -9   3   1   97.20   14.74
   3   6   1   90.30   15.04
   3   6   1   71.56   14.57
   6  -9   1   85.03   18.38
   6  -9   1   51.90   11.84
  -9   3   1   71.52   14.10
  -9   3   1   75.10   19.04
   6  -9   1   57.91   17.73
  10  -4  -1   40.48   12.64
  10  -4  -1   24.28   20.87
  -6  10  -1   22.41   15.60
  -4  -6  -1   39.83   12.11
  10  -4  -1   20.95   12.33
  -6  10  -1    2.83   14.44
  -4  -6  -1   39.73   12.62
  -6  10  -1   40.53   18.05
 -10   4   1   28.74   12.24
   6 -10   1   24.99   16.89
 -10   4   1   35.60   12.83
   6 -10   1   28.59   15.32
 -10   4   1   21.77   17.41
   4   6   1   13.37   11.34
   4   6   1   18.36   10.60
   6 -10   1   15.88   14.96
  -6  11  -1   39.40   15.92
  -5  -6  -1   51.62   12.94
  -5  -6  -1   44.49   13.21
  -6  11  -1   68.18   22.35
  -6  11  -1   67.39   16.69
   6 -11   1   41.64   16.98
 -11   5   1   95.71   22.89
 -11   5   1   69.59   14.93
   6 -11   1   33.67   16.65
  -6  12  -1   16.39   14.49
  -6  -6  -1   12.12   13.94
 -12   6   1   14.31   19.34
 -12   6   1    0.64   13.69
   6 -12   1   17.16   16.22
  -7  -6  -1   48.70   13.20
 -13   7   1   45.70   22.51
   6 -13   1   63.21   21.50
 -13   7   1   47.98   18.27
  -7  -5  -1    7.57   19.50
  -5  12  -1   -9.16   12.41
   5 -12   1   -6.85   13.68
 -12   7   1    9.74   14.80
 -12   7   1    4.18   22.53
  -7  -4  -1   -0.78   10.38
  -4  11  -1   -0.31   12.89
  -4  11  -1   23.59   19.45
  -7  -4  -1   21.10   11.41
  -4  11  -1   10.12   11.61
 -11   7   1   -0.53   18.12
 -11   7   1   -1.85   14.31
   4 -11   1   -9.15   15.47
  -7  -3  -1   -7.72    8.22
  10  -7  -1  -11.39   11.36
  -3  10  -1    1.76   13.32
  -7  -3  -1    3.32    9.46
  10  -7  -1  -32.10   17.96
  10  -7  -1   -4.63    9.97
  -3  10  -1  -10.16   11.43
  -3  10  -1   -9.19    9.58
  -7  -3  -1   -5.33    8.35
 -10   7   1   -6.13   11.90
   3 -10   1    1.54    9.80
   3 -10   1   -8.40   13.76
   7   3   1   -0.56   10.31
   3 -10   1    7.31   11.18
   7   3   1   -5.33    9.85
 -10   7   1    6.84   17.22
   7   3   1   -1.55   10.36
 -10   7   1   13.60   13.72
   9  -7  -1    3.05   12.00
  -2   9  -1   30.44    8.95
   9  -7  -1    4.49   13.71
  -7  -2  -1    8.91    9.41
  -7  -2  -1    9.66   10.57
  -2   9  -1   13.97   12.90
  -2   9  -1   16.15   13.62
  -7  -2  -1   16.73    9.62
   7   2   1    6.21   10.86
  -9   7   1    5.00   16.26
   7   2   1   12.08   11.71
  -9   7   1  -15.82   12.12
   2  -9   1   37.45   15.71
   7   2   1   26.10   10.13
   2  -9   1   12.50   11.44
  -9   7   1   19.18   10.94
   2  -9   1   15.20    8.49
  -7  -1  -1   20.11   12.07
   8  -7  -1   -1.08   16.87
  -7  -1  -1    2.35    8.74
  -7  -1  -1    7.25    8.40
  -1   8  -1   14.51   11.10
  -1   8  -1   -4.74    8.49
   8  -7  -1   18.13   11.05
  -1   8  -1   -2.33    5.97
   8  -7  -1    4.78   12.27
  -8   7   1    2.95   12.55
   1  -8   1  -16.13    9.66
   1  -8   1   22.34   13.08
  -8   7   1   -3.82   11.06
  -8   7   1  -14.73   15.73
   7   1   1   -1.35    9.07
   7   1   1   31.18   15.21
   7   1   1    6.39    8.97
   1  -8   1   -5.95    5.58
   7  -7  -1   28.17   12.85
  -7   0  -1   18.92    9.12
  -7   0  -1   39.89   10.55
   7  -7  -1   32.60   11.55
  -7   0  -1   28.54   13.55
   0   7  -1   17.60   10.19
   7  -7  -1   24.83   17.08
   7   0   1   50.15   10.62
   7   0   1   32.68    9.74
   7   0   1   26.73   13.85
  -7   7   1   21.18   16.64
  -7   7   1   31.73   11.79
   0  -7   1   52.92   13.82
   0  -7   1   51.03   12.14
  -7   7   1   38.72   12.76
   1   6  -1   16.94    9.46
   6  -7  -1    6.13   13.07
  -7   1  -1   19.15    9.84
  -7   1  -1    5.44   13.24
   6  -7  -1    0.51   11.27
  -7   1  -1   17.89    9.41
   6  -7  -1   20.30   15.29
   1   6  -1   19.79    9.36
  -1  -6   1    1.63   10.39
  -6   7   1   13.79   11.76
  -1  -6   1    6.55    9.81
   7  -1   1   12.13    9.11
  -6   7   1    8.13   12.49
   7  -1   1   16.12    8.85
   7  -1   1    2.83   13.27
  -6   7   1    0.05   15.81
  -7   2  -1   35.26    9.63
   5  -7  -1   23.13   12.45
   2   5  -1   19.78    9.46
  -7   2  -1   19.63   14.33
   5  -7  -1    7.16   10.06
   2   5  -1   18.27    8.64
  -7   2  -1   19.14    9.62
   5  -7  -1   18.13   13.34
  -2  -5   1   26.94   10.03
  -5   7   1   21.84   10.82
   7  -2   1   22.41    9.56
  -5   7   1   -0.12   11.97
  -5   7   1    4.59   12.54
   7  -2   1   15.36   13.98
   7  -2   1    8.95    9.26
  -2  -5   1   18.37    9.34
   3   4  -1    9.76    8.51
   4  -7  -1   11.34   11.75
   3   4  -1    9.94    4.99
   3   4  -1   12.09    4.56
   4  -7  -1   -7.28   11.12
   3   4  -1    7.40    8.41
   4  -7  -1    6.14   11.97
  -7   3  -1    7.94   10.41
  -4   7   1   10.19   11.28
   7  -3   1   14.39   14.27
  -4   7   1   -1.35   10.93
  -3  -4   1   25.67    8.43
   7  -3   1   19.33    9.45
   7  -3   1   24.39    9.93
  -4   7   1   15.38   12.96
  -3  -4   1    7.86    7.38
  -7   4  -1   30.49   11.68
  -7   4  -1    5.06   14.64
   3  -7  -1   14.15   11.98
   3  -7  -1   -2.73   10.00
   4   3  -1    8.79    7.28
   4   3  -1   10.62    7.43
   3  -7  -1   10.11   12.91
  -7   4  -1   17.41   10.60
   4   3  -1   12.64    7.38
  -3   7   1   -9.96    9.49
  -4  -3   1    5.30    7.48
   7  -4   1   -8.29   13.82
  -3   7   1   -4.51   10.90
   7  -4   1    1.30    8.51
   7  -4   1   10.23    9.88
  -4  -3   1    7.98    7.42
  -3   7   1    6.13   11.56
  -7   5  -1    8.56    8.19
   5   2  -1    6.55    9.63
   5   2  -1   15.11    8.12
   5   2  -1   12.87    7.65
   2  -7  -1   15.49   10.45
  -7   5  -1   12.54   10.91
   2  -7  -1   14.32   12.00
   2  -7  -1   14.52    8.42
  -7   5  -1   -6.70   13.37
  -5  -2   1   25.13    9.23
   7  -5   1   29.27   11.55
  -2   7   1   30.34   12.49
   7  -5   1   14.94   11.44
  -5  -2   1   23.32    7.92
  -2   7   1   15.68    8.43
  -5  -2   1   33.57    8.01
   7  -5   1    6.67   14.58
  -2   7   1    8.22   10.52
  -7   6  -1    9.70    9.73
  -7   6  -1   -2.63   14.24
   6   1  -1   10.51    7.72
   6   1  -1   13.44    8.25
   1  -7  -1   13.07   13.54
   1  -7  -1   16.09   12.11
   6   1  -1    9.00   11.36
  -7   6  -1   11.17   11.99
   1  -7  -1   15.19    6.07
  -6  -1   1   -1.14   10.94
  -1   7   1   12.69   11.01
   7  -6   1   18.24   10.83
   7  -6   1   26.08   15.35
  -1   7   1    3.43    5.73
  -1   7   1   16.29   10.52
  -6  -1   1    4.98    7.67
  -6  -1   1   11.44    7.88
   7  -6   1   42.67   12.45
   7   0  -1   39.56    9.50
  -7   7  -1   57.28   15.19
  -7   7  -1    1.45   15.89
   7   0  -1   32.69    8.79
   7   0  -1   34.32   14.36
   0  -7  -1   46.80   13.61
  -7   7  -1   56.30   14.67
   0  -7  -1   24.00    9.39
   7  -7   1   65.87   15.28
  -7   0   1   44.39   14.07
   7  -7   1   29.77   12.48
   7  -7   1   41.17   17.14
  -7   0   1   23.94    8.76
  -7   0   1   22.96    9.31
   0   7   1   14.24   11.96
   0   7   1   37.30   11.79
  -7   8  -1   -0.84   10.22
   8  -1  -1    6.06   14.33
  -7   8  -1   -0.88   15.56
  -7   8  -1   -2.36   10.45
  -1  -7  -1   -0.59    9.00
   8  -1  -1    2.77    7.93
  -1  -7  -1    1.91   10.40
   8  -1  -1   20.40    9.93
   1   7   1   -8.52    9.36
   7  -8   1   -5.75   11.07
  -8   1   1   -8.13   13.33
   7  -8   1  -10.56   16.13
  -8   1   1  -13.12    8.54
  -8   1   1   -2.72    8.51
   1   7   1   -9.27   11.20
   7  -8   1   18.96   13.65
  -2  -7  -1    5.03   10.20
   9  -2  -1   12.31   10.47
   9  -2  -1   -5.76    9.12
  -2  -7  -1   -2.45   11.29
  -7   9  -1   -0.75   15.58
  -7   9  -1    3.17    9.25
   9  -2  -1    4.39   14.95
  -9   2   1   27.69   10.51
   7  -9   1    0.16   15.41
   2   7   1   17.06   14.57
  -9   2   1   13.01   15.39
   7  -9   1   20.65   13.78
   2   7   1   27.09   12.02
  -9   2   1   16.67   10.08
   7  -9   1    6.22   13.13
  -3  -7  -1   10.40   10.72
  10  -3  -1   11.42   10.56
  10  -3  -1  -58.13   16.44
  -7  10  -1   -9.97   14.58
  -7  10  -1   27.31   16.49
  -3  -7  -1  -11.04    9.83
  -7  10  -1  -10.43   18.48
  10  -3  -1    1.05   10.31
 -10   3   1    7.62   16.19
 -10   3   1    7.20   10.11
   7 -10   1   11.72   15.38
   3   7   1   -8.16   10.75
   7 -10   1   -9.05   15.28
 -10   3   1  -10.59   10.81
   3   7   1   -6.08   10.54
   7 -10   1   16.71   15.81
  -7  11  -1  -20.70   22.73
  -7  11  -1   10.16   15.59
  -4  -7  -1    7.30   12.26
  -7  11  -1   -7.18   13.60
  -4  -7  -1   15.97   11.54
   7 -11   1    3.55   15.97
 -11   4   1  -10.95   16.70
 -11   4   1   12.11   13.31
 -11   4   1    1.67   11.63
   7 -11   1  -25.30   16.30
  -7  12  -1  -20.40   20.99
  -7  12  -1   -6.04   14.29
  -5  -7  -1    7.89   14.29
 -12   5   1  -12.13   17.80
 -12   5   1   -4.91   12.52
   7 -12   1  -19.19   16.54
  -7  13  -1   59.58   17.89
  -6  -7  -1   57.81   15.03
 -13   6   1   82.78   23.40
   7 -13   1   78.95   21.92
 -13   6   1   41.61   14.93
  -7  -7  -1   -6.06   11.81
 -14   7   1  -15.05   14.95
   7 -14   1   20.52   24.42
 -14   7   1    5.07   19.41
  -8  -7  -1   21.09   13.32
 -15   8   1  -14.71   17.08
   7 -15   1  -18.34   20.74
 -15   8   1   36.27   22.19
  -8  -6  -1   24.03   12.33
 -14   8   1   17.51   21.73
   6 -14   1    3.77   23.28
 -14   8   1  -10.80   16.14
  -8  -5  -1   18.87   11.84
   5 -13   1   -8.95   17.52
 -13   8   1   31.00   21.75
 -13   8   1   10.28   16.22
  -8  -4  -1   -8.72   10.53
 -12   8   1    2.17   15.31
   4 -12   1  -15.70   13.85
 -12   8   1   11.50   22.88
  -8  -3  -1   68.61   13.00
   3 -11   1   42.53   15.82
 -11   8   1   33.85   16.90
 -11   8   1   58.66   20.92
  -2  10  -1   -2.19   10.17
  -8  -2  -1   -0.70    9.19
  -2  10  -1   16.65   14.46
  -8  -2  -1  -12.32   10.65
  -8  -2  -1   -5.81    8.98
  10  -8  -1   -1.28   13.32
  -2  10  -1   -2.73    7.18
  10  -8  -1   -4.88   12.36
 -10   8   1  -15.28   13.19
 -10   8   1    3.53   16.78
   8   2   1  -30.19   11.75
   2 -10   1  -10.79   13.88
   9  -8  -1   38.13   17.29
  -8  -1  -1   34.76   10.18
   9  -8  -1   28.28   14.58
   9  -8  -1  -15.06   18.50
  -8  -1  -1   26.66   10.50
   1  -9   1   29.99   11.69
   8   1   1    2.07   14.17
   8   1   1   35.10   11.13
  -9   8   1   29.06   12.50
  -9   8   1   74.87   19.56
  -9   8   1   21.17   18.07
   8   1   1   40.36   11.53
   1  -9   1   28.48   14.24
   8  -8  -1   57.94   19.94
   8  -8  -1  111.95   19.22
  -8   0  -1   53.82   11.72
  -8   0  -1   86.88   16.71
  -8   0  -1   80.82   12.97
   0   8  -1   48.03   14.42
   0   8  -1   85.60   15.64
   8  -8  -1   85.62   16.54
   8   0   1  115.48   14.28
  -8   8   1   65.99   18.92
   0  -8   1   87.30   15.06
   0  -8   1  101.02   16.80
  -8   8   1   99.88   18.36
   8   0   1   78.71   17.88
  -8   8   1   90.59   18.91
   8   0   1   93.28   13.90
  -8   1  -1  -11.60    9.23
   7  -8  -1   -5.87   15.43
   7  -8  -1   14.04   14.68
   1   7  -1  -13.15    9.41
  -8   1  -1   21.20   14.12
   7  -8  -1    8.91   14.60
  -8   1  -1    0.23    9.22
   1   7  -1  -12.29   10.23
  -1  -7   1    4.27   10.46
  -7   8   1   -6.62   13.70
  -1  -7   1  -11.35   10.86
   8  -1   1   -2.31   14.56
  -7   8   1  -20.94   14.05
   8  -1   1    5.19    9.90
   8  -1   1    6.98    8.49
  -7   8   1    4.01   10.40
  -8   2  -1   34.70   11.44
   2   6  -1   68.46   11.60
   6  -8  -1   82.77   17.66
   6  -8  -1   64.44   16.56
   2   6  -1   55.97   11.22
  -8   2  -1   42.48   16.03
   6  -8  -1   44.52   16.17
  -8   2  -1   47.29   11.35
  -2  -6   1   25.35   10.40
  -2  -6   1   55.90   11.59
  -6   8   1   37.61   15.33
   8  -2   1   63.15   17.89
   8  -2   1   50.69   11.16
   8  -2   1   55.71   11.59
  -6   8   1   29.85   15.51
  -6   8   1   34.66   12.45
   5  -8  -1  -22.06   12.51
   5  -8  -1   -0.76    9.97
  -8   3  -1   -1.92   10.88
   3   5  -1    3.75    9.27
   3   5  -1   15.18    8.97
  -8   3  -1    4.44   14.45
  -8   3  -1  -12.57    8.07
   5  -8  -1    8.82   13.24
  -5   8   1  -12.83   11.42
   8  -3   1  -20.07   15.35
   8  -3   1  -10.87    8.18
  -3  -5   1  -15.67    7.75
   8  -3   1    1.27   10.04
  -3  -5   1   -3.67    8.61
  -5   8   1    4.98   11.43
  -5   8   1    2.21   12.89
   4  -8  -1   -6.13   12.84
   4   4  -1   -5.35    7.32
   4  -8  -1   -2.46    9.58
   4  -8  -1   12.30   11.29
   4   4  -1  -11.67    7.99
   4   4  -1  -15.13    6.00
  -8   4  -1   -7.67   14.30
  -8   4  -1   -0.50   10.07
  -4  -4   1    6.87    8.36
   8  -4   1   -6.02   17.68
   8  -4   1  -27.44   14.89
   8  -4   1   -5.42    8.66
  -4   8   1   14.81   11.73
  -4   8   1    8.85   12.49
  -4  -4   1   -5.20    7.70
  -4   8   1   -7.68   10.53
   5   3  -1   -3.65    7.83
   5   3  -1   -4.90    8.15
  -8   5  -1    6.88   10.97
   3  -8  -1   27.28   10.30
   5   3  -1   -3.21    7.33
  -8   5  -1   12.31   11.39
   3  -8  -1   -8.89    9.38
   3  -8  -1   12.90   12.27
  -8   5  -1    1.73   16.44
   8  -5   1   -2.14    8.74
  -5  -3   1   13.69    8.09
  -3   8   1   -4.37   12.11
   8  -5   1  -13.87   15.53
   8  -5   1   -9.39    9.28
  -3   8   1   -8.99    8.98
  -3   8   1   -3.25   10.70
  -8   6  -1   53.77   17.68
  -8   6  -1   58.57   13.61
   6   2  -1   49.29   11.93
   6   2  -1   81.74   10.95
  -8   6  -1   48.29   14.49
   6   2  -1   61.62   10.28
   2  -8  -1   56.22   14.66
   2  -8  -1   44.11   15.20
   2  -8  -1   44.53   10.04
  -2   8   1   68.75   14.67
  -2   8   1   59.20   12.98
  -2   8   1   50.71    9.79
   8  -6   1   63.44   15.12
  -6  -2   1   75.99   10.64
   8  -6   1   44.41   13.65
  -6  -2   1   38.74   10.30
   8  -6   1   58.07   18.14
  -6  -2   1   50.20   11.92
   1  -8  -1   -6.66   11.77
   7   1  -1   -8.69   11.47
   1  -8  -1   -4.26   11.01
  -8   7  -1   24.18   13.24
   7   1  -1    5.42    8.08
   7   1  -1    9.95    8.19
  -8   7  -1   12.57    9.40
  -8   7  -1    9.88   16.58
   8  -7   1   20.89   17.01
  -7  -1   1   15.45    8.41
   8  -7   1    8.21   12.65
  -1   8   1    5.29   11.42
  -7  -1   1   11.86    8.49
  -7  -1   1   -7.61   10.78
   8  -7   1   -9.65   12.70
  -8   8  -1   73.36   15.69
   0  -8  -1   34.73   13.48
   8   0  -1   83.48   12.31
   8   0  -1   81.01   12.13
   0  -8  -1   82.18   15.81
   8   0  -1   82.93   17.30
  -8   8  -1   74.29   15.98
  -8   8  -1   92.57   20.67
  -8   0   1   83.37   15.92
   0   8   1   55.10   15.17
   8  -8   1   95.76   21.26
   8  -8   1   87.48   16.36
   0   8   1   54.30   13.40
  -8   0   1   66.35   11.24
   8  -8   1   63.99   14.74
  -8   0   1  101.41   12.55
  -8   9  -1   26.20   16.83
   9  -1  -1   30.04   16.56
  -1  -8  -1   36.08   12.98
  -8   9  -1   14.96   17.20
  -8   9  -1   60.35   19.98
   9  -1  -1   34.19   11.03
  -1  -8  -1   22.79   12.07
   9  -1  -1   37.89   10.08
   8  -9   1    0.57   13.35
   1   8   1   28.06   13.59
  -9   1   1   35.16   15.31
   8  -9   1   28.24   18.45
   1   8   1   18.03   12.12
  -9   1   1   38.54   10.78
   8  -9   1   68.97   19.76
  -9   1   1   34.88   10.08
  -8  10  -1   -8.54   10.67
  -8  10  -1   -8.50   16.18
  -2  -8  -1   -8.03   10.43
  -8  10  -1   -2.17   15.70
  -2  -8  -1  -18.13   10.95
   8 -10   1   -4.66   15.24
 -10   2   1  -25.06   14.50
   2   8   1   -5.44   16.00
   8 -10   1  -17.23   17.24
 -10   2   1   -8.46   10.09
 -10   2   1   -3.10    9.15
   8 -10   1  -17.12   12.92
  -8  11  -1   60.59   23.11
  -8  11  -1   25.09   17.68
  -3  -8  -1   57.37   14.17
 -11   3   1   58.01   13.67
 -11   3   1   57.68   14.06
   8 -11   1   31.38   20.18
   8 -11   1   68.22   20.93
 -11   3   1   59.47   19.56
  -8  12  -1   28.79   18.63
  -8  12  -1   21.70   16.42
  -4  -8  -1   28.20   15.68
 -12   4   1    9.27   17.64
   8 -12   1   15.51   18.95
 -12   4   1   13.83   13.46
  -5  -8  -1   -8.28   11.69
  -8  13  -1   18.90   16.66
   8 -13   1   12.53   19.18
 -13   5   1    0.53   12.97
 -13   5   1   46.28   21.25
  -6  -8  -1  -20.44   12.59
 -14   6   1   24.54   14.92
 -14   6   1    9.26   18.98
   8 -14   1   11.54   24.31
  -7  -8  -1  -10.06   12.38
 -15   7   1   30.40   22.38
 -15   7   1  -22.15   14.62
  -9  -6  -1    4.24   12.43
   6 -15   1   32.84   22.66
 -15   9   1   17.79   22.55
 -15   9   1   24.74   19.87
  -9  -5  -1  -10.39   11.36
   5 -14   1   32.03   22.46
 -14   9   1  -23.46   17.56
 -14   9   1    8.82   21.82
  -9  -4  -1   -3.71   10.83
   4 -13   1   -6.65   17.38
 -13   9   1   15.29   21.91
 -13   9   1  -17.29   16.94
  -9  -3  -1    5.00   10.28
   3 -12   1   -0.51   15.99
 -12   9   1   19.76   19.97
 -12   9   1   29.20   20.62
  -9  -2  -1    6.77   10.84
  -9  -2  -1   -6.24    9.73
  -9  -2  -1   18.53   12.24
   2 -11   1   24.20   17.23
 -11   9   1    0.77   14.59
 -11   9   1   48.67   20.91
  -9  -1  -1   21.56   10.61
  -9  -1  -1   24.15   13.22
  -9  -1  -1   -6.14    9.50
  10  -9  -1   -1.28   12.62
  10  -9  -1   15.21   13.91
 -10   9   1   14.29   14.99
   1 -10   1   -5.85   13.44
   9   1   1  -35.60   13.95
 -10   9   1   12.96   18.43
   0   9  -1    0.30   10.14
   9  -9  -1   -9.23   18.92
  -9   0  -1   12.23   10.16
   9  -9  -1   17.16   13.79
   9  -9  -1    4.45   14.16
  -9   0  -1   -3.79   10.14
  -9   0  -1    7.64   13.61
   0   9  -1   19.09   12.56
  -9   9   1   20.27   17.72
  -9   9   1    2.84   10.56
   0  -9   1    2.50   11.94
   9   0   1  -24.31   15.15
   9   0   1   -1.54   11.31
  -9   9   1   16.41   13.23
   0  -9   1    2.36   11.51
   9   0   1   15.12   10.57
  -9   1  -1   31.35   15.28
   8  -9  -1   48.71   15.33
   8  -9  -1    5.08   18.20
   8  -9  -1   36.02   14.37
   1   8  -1   32.18   12.05
  -9   1  -1   38.15   12.08
   1   8  -1   46.42   13.94
  -9   1  -1   18.34   10.79
   9  -1   1    6.68   16.69
   9  -1   1   32.27   10.51
   9  -1   1   57.72   12.33
  -8   9   1   35.18   17.35
  -8   9   1   17.13   13.04
  -1  -8   1   42.24   13.59
  -1  -8   1   39.86   12.43
  -8   9   1   27.78   16.01
  -9   2  -1   14.50    9.94
   7  -9  -1   20.61   13.43
   2   7  -1   26.29   10.80
  -9   2  -1   13.03   10.55
   7  -9  -1   18.79   16.99
   7  -9  -1   13.82   15.49
  -9   2  -1    6.27   15.00
   9  -2   1  -10.00   15.90
  -7   9   1   12.58   15.54
  -7   9   1   16.00   15.49
   9  -2   1    9.38   11.18
  -2  -7   1    9.40   10.78
  -2  -7   1   21.57   11.60
   6  -9  -1   86.47   19.27
   3   6  -1   62.07   13.55
  -9   3  -1   94.61   19.51
   6  -9  -1   68.83   17.89
  -9   3  -1   76.07   14.31
  -9   3  -1  119.76   15.54
   3   6  -1   66.71   12.88
  -6   9   1   99.25   17.98
  -6   9   1   69.10   17.33
  -6   9   1   37.45   14.12
   9  -3   1   86.23   14.19
  -3  -6   1   75.95   13.22
   9  -3   1   94.32   15.74
  -3  -6   1   73.82   12.84
   9  -3   1   90.97   21.26
  -9   4  -1   24.85   15.79
   4   5  -1   34.80    9.80
  -9   4  -1   41.31   13.49
   5  -9  -1    3.65   13.16
   4   5  -1   19.74    9.71
   5  -9  -1    1.22    9.13
   5  -9  -1   23.90   15.57
  -9   4  -1   16.13    9.42
  -5   9   1   42.06   11.60
  -5   9   1   12.04   13.75
  -5   9   1   18.71   12.97
  -4  -5   1   24.42   10.25
  -4  -5   1   34.42   10.25
   9  -4   1   26.83   10.74
   9  -4   1   26.90   12.33
   9  -4   1    1.79   16.47
   5   4  -1   26.30    9.70
   4  -9  -1   14.51   11.53
  -9   5  -1   26.59   12.86
   5   4  -1   31.94    9.79
   4  -9  -1   40.98   16.61
   5   4  -1   13.36    8.22
  -9   5  -1    9.41   16.06
  -9   5  -1   16.58   10.22
   4  -9  -1   18.17   13.81
   9  -5   1   14.70   10.81
  -4   9   1   10.62   11.26
  -5  -4   1   19.41    9.03
  -4   9   1   43.52   15.21
   9  -5   1   14.59   10.68
  -4   9   1   14.30   14.17
  -5  -4   1   22.58    9.06
   9  -5   1    7.99   17.17
   6   3  -1  104.34   12.74
   3  -9  -1   42.41   13.10
   3  -9  -1   65.10   12.27
   3  -9  -1   58.14   14.31
  -9   6  -1   50.56   13.25
   6   3  -1   81.59   11.93
  -9   6  -1  106.77   18.28
   6   3  -1   63.94   12.56
  -9   6  -1   77.79   19.74
  -6  -3   1   60.94   11.23
   9  -6   1   44.87   19.13
  -3   9   1   47.12   14.97
  -3   9   1   54.69   13.33
  -3   9   1   75.30   12.16
   9  -6   1   93.06   15.55
   9  -6   1   58.25   15.12
   2  -9  -1    8.04   12.95
  -9   7  -1   21.36   13.52
   2  -9  -1    7.63    7.73
  -9   7  -1   34.28   18.97
  -9   7  -1    7.97   12.96
   2  -9  -1   14.80   12.49
   7   2  -1   10.68    8.76
   7   2  -1    9.65   19.94
  -7  -2   1   40.92    9.66
   9  -7   1   24.52   13.02
  -2   9   1   27.81   14.84
  -7  -2   1   26.18   11.09
  -2   9   1   21.45    7.63
   9  -7   1   30.18   13.83
  -7  -2   1   27.97    9.26
  -2   9   1   17.27   12.97
  -9   8  -1   37.98   16.86
   1  -9  -1   18.78   13.55
   8   1  -1   38.78   10.25
   8   1  -1   -0.08   14.52
  -9   8  -1   22.81   15.56
   8   1  -1   26.66    9.56
  -9   8  -1    9.05   17.76
   1  -9  -1   40.16   15.58
   9  -8   1   36.72   15.78
   9  -8   1  -11.26   18.21
  -8  -1   1   45.85   10.33
  -1   9   1    6.40   12.90
   9  -8   1   34.20   13.90
  -8  -1   1   20.52    9.10
  -8  -1   1   38.24   13.76
  -1   9   1   30.01   11.65
   9   0  -1    9.35    9.06
   9   0  -1   -6.19    9.83
   0  -9  -1   22.68   12.36
   9   0  -1   -0.13   16.65
  -9   9  -1   10.88   18.60
  -9   9  -1   16.73   13.88
  -9   9  -1   11.03   17.29
   0   9   1   12.93   14.56
   9  -9   1   16.22   17.83
   0   9   1   13.57   13.15
  -9   0   1    3.85    9.63
  -9   0   1   13.29   13.61
   9  -9   1   18.04   15.78
   9  -9   1  -16.16   18.52
  -9   0   1   -2.34    8.75
  -9  10  -1   -6.40   16.96
  -9  10  -1    9.91   17.63
  10  -1  -1   -7.64   21.49
  -1  -9  -1   22.03   13.16
   9 -10   1    4.23   19.80
 -10   1   1    2.46   14.64
   9 -10   1   -2.05   14.31
   9 -10   1   12.00   15.13
 -10   1   1   18.77   10.69
 -10   1   1    9.88    9.21
  -9  11  -1    2.58   16.33
  11  -2  -1  -21.87   22.10
  -9  11  -1   36.69   19.80
  -2  -9  -1   25.05   12.17
 -11   2   1   25.22   16.35
   9 -11   1   -3.78   17.37
 -11   2   1    7.65   11.17
 -11   2   1  -12.69   17.11
  -9  12  -1   22.89   17.97
  -9  12  -1   14.28   17.61
  -3  -9  -1    4.33   12.90
 -12   3   1   17.42   12.35
 -12   3   1   33.21   17.98
   9 -12   1   26.68   19.28
  -4  -9  -1  -15.50   11.84
  -9  13  -1   11.38   17.09
 -13   4   1   29.02   19.60
 -13   4   1   24.94   13.63
  -5  -9  -1   -3.68   12.77
 -14   5   1    5.57   13.94
 -14   5   1   24.81   19.87
  -6  -9  -1    0.13   14.23
 -15   6   1   39.99   21.21
 -15   6   1  -10.07   14.35
 -10  -5  -1    9.46   13.83
   5 -15   1  -28.33   18.62
 -15  10   1  -33.83   18.41
 -10  -4  -1   -7.54   11.35
 -14  10   1   -6.34   18.45
 -14  10   1  -10.35   23.14
   4 -14   1   -3.68   19.62
 -10  -3  -1   18.86   12.19
 -13  10   1   14.98   17.67
 -13  10   1   81.61   27.53
   3 -13   1   43.34   19.11
 -10  -2  -1    7.23   11.03
   2 -12   1   12.42   16.85
 -12  10   1   19.53   16.62
 -12  10   1   19.28   19.88
 -10  -1  -1    2.21   13.69
 -11  10   1   -6.80   18.28
   1 -11   1    0.05   13.39
 -11  10   1    0.42   18.56
 -10   0  -1   88.99   17.86
 -10   0  -1   41.42   12.57
 -10   0  -1   59.02   13.35
  10 -10  -1   23.38   15.82
   0 -10   1   29.43   15.05
 -10  10   1   62.55   20.39
 -10  10   1   79.02   22.82
   9 -10  -1    7.37   13.65
 -10   1  -1   22.55   11.44
 -10   1  -1   21.78   10.65
   9 -10  -1  -37.81   19.06
 -10   1  -1   24.51   15.97
   9 -10  -1   22.13   15.63
  10  -1   1  -28.62   17.90
  -9  10   1    7.62   17.99
  -1  -9   1    4.99   11.92
  -9  10   1   21.84   14.46
 -10   2  -1    8.02   15.18
 -10   2  -1  -11.08   10.63
 -10   2  -1   -2.47   10.55
   8 -10  -1  -18.50   20.74
   8 -10  -1   -4.23   15.81
   8 -10  -1   -1.70   14.56
  -2  -8   1   19.61   11.08
  -8  10   1  -11.17   14.64
  -8  10   1   17.44   19.14
  -2  -8   1  -15.31   10.35
  -8  10   1   18.19   16.58
   7 -10  -1   36.44   16.13
   7 -10  -1    9.86   13.82
   3   7  -1    2.26   10.12
 -10   3  -1    8.67   11.38
   7 -10  -1  -28.55   15.01
 -10   3  -1   -2.89   15.73
 -10   3  -1    6.49   11.76
   3   7  -1   -0.85   10.76
  -7  10   1   -9.81   14.50
  -7  10   1   -7.99   14.28
  10  -3   1  -44.25   18.56
  10  -3   1   -7.60   11.05
  -3  -7   1   -8.31   10.11
  10  -3   1  -14.65   10.73
  -3  -7   1   -1.02   10.24
  -7  10   1   -4.84   17.37
   6 -10  -1  -12.96   14.18
   4   6  -1   34.26   11.39
 -10   4  -1   40.04   18.65
 -10   4  -1   26.39   13.69
 -10   4  -1   16.99   12.13
   4   6  -1   23.35   11.08
   6 -10  -1   30.12   14.54
   6 -10  -1   21.23   13.74
  -6  10   1   20.80   17.30
  10  -4   1   28.53   12.90
  -4  -6   1   26.04   10.69
  -6  10   1   12.10   13.48
  -4  -6   1   14.97   10.94
  10  -4   1    7.53   18.95
  -6  10   1    6.96   12.01
  10  -4   1   29.23   14.00
   5 -10  -1  -13.89   13.37
   5 -10  -1  -15.17   11.79
   5   5  -1   -8.55    8.38
   5 -10  -1    2.23   12.17
   5   5  -1    1.33    9.10
 -10   5  -1    4.58   12.15
 -10   5  -1   -3.23   18.02
 -10   5  -1   -7.72   12.16
  -5  10   1    1.46   13.49
  -5  -5   1    5.93    9.27
  10  -5   1  -50.23   16.96
  -5  -5   1    9.96    9.24
  -5  10   1  -12.17   17.01
  -5  10   1   14.97   14.65
  10  -5   1   -9.37   11.11
  10  -5   1  -11.88   12.66
   4 -10  -1   23.70   14.01
   6   4  -1   49.04   11.03
 -10   6  -1   20.67   13.84
   6   4  -1    8.00    8.90
   4 -10  -1   22.60   16.96
   6   4  -1   21.04    9.80
 -10   6  -1   27.00   12.13
 -10   6  -1   42.97   18.89
  -4  10   1    0.78   12.91
  -6  -4   1   21.80   10.05
  -4  10   1   22.82   15.60
  10  -6   1   13.27   12.80
  -4  10   1    9.90   10.91
  10  -6   1   32.89   12.56
  -6  -4   1   13.48    9.65
  10  -6   1  -16.78   18.65
   7   3  -1  -39.43   10.62
 -10   7  -1   -6.82   13.62
 -10   7  -1    9.28   12.52
 -10   7  -1    4.19   18.40
   7   3  -1   -9.93    8.71
   3 -10  -1  -10.88   10.64
   3 -10  -1    1.03    9.51
   3 -10  -1   -6.54   13.45
   7   3  -1   -4.54    9.21
  10  -7   1  -12.28   12.85
  -3  10   1   -9.15    9.68
  10  -7   1   35.58   25.01
  10  -7   1  -45.87   18.58
  -7  -3   1    4.12    8.78
  -3  10   1    0.93   13.89
  -3  10   1   -8.45    8.89
   2 -10  -1    1.51   14.54
 -10   8  -1    3.57   14.68
   8   2  -1  -44.04   12.89
 -10   8  -1    7.46   17.56
   8   2  -1   -9.55    7.83
  -8  -2   1   -8.86   11.32
  -8  -2   1   -6.22    8.27
  10  -8   1    5.06   14.09
  -2  10   1  -10.32   11.90
  10  -8   1  -10.53   22.50
  -8  -2   1    6.18    8.95
 -10   9  -1   26.41   19.28
 -10   9  -1   21.11   19.35
   1 -10  -1   17.09   15.00
   9   1  -1  -16.76   15.70
  -9  -1   1   17.21    9.31
  -9  -1   1   35.53   14.24
  -9  -1   1   33.61   10.58
  10  -9   1   10.74   16.62
  10  -9   1   28.10   17.69
  -1  10   1   -4.31   15.18
 -10  10  -1   34.40   14.19
   0 -10  -1   40.59   15.04
 -10  10  -1   90.88   21.60
  10   0  -1    7.32   30.73
 -10   0   1   58.19   12.38
 -10   0   1   51.49   11.35
  10 -10   1   35.44   18.81
  10 -10   1   50.78   16.86
 -10   0   1   68.98   17.52
 -10  11  -1    8.69   18.86
 -10  11  -1   14.94   17.15
  -1 -10  -1    2.34   12.58
 -11   1   1   13.84   15.65
 -10  12  -1    8.12   18.77
 -10  12  -1   39.23   19.36
  -2 -10  -1  -26.17   13.10
 -12   2   1   13.29   12.40
 -12   2   1   -3.49   16.34
  -3 -10  -1   49.70   16.38
 -10  13  -1   76.41   21.65
 -13   3   1   68.00   21.20
 -13   3   1   23.36   13.88
  -4 -10  -1  -21.03   14.03
 -10  14  -1   18.83   21.86
 -14   4   1    1.06   13.58
 -14   4   1   -3.97   18.27
 -15   5   1   10.86   19.96
 -11  -4  -1    6.99   13.46
 -15  11   1   17.35   23.26
   4 -15   1   10.69   22.84
 -15  11   1   52.47   27.26
 -11  -3  -1    0.44   12.26
 -14  11   1   43.04   26.09
   3 -14   1    4.87   17.46
 -14  11   1    0.79   23.15
 -11  -2  -1   -8.33   11.39
 -13  11   1   10.34   18.44
 -13  11   1   27.45   25.12
   2 -13   1    6.14   16.56
 -11  -1  -1   -9.42   11.24
   1 -12   1    5.00   16.37
 -12  11   1  -17.41   18.86
 -11   0  -1   11.53   15.79
 -11   0  -1    9.71   11.73
 -11  11   1  -29.53   18.24
 -11  11   1  -12.51   22.61
   0 -11   1    1.93   15.24
 -11   1  -1   27.23   15.75
 -11   1  -1    9.63   18.02
  -1 -10   1    1.09   15.52
 -10  11   1  -10.44   17.54
 -10  11   1   18.84   17.88
 -11   2  -1    1.60   11.40
 -11   2  -1   13.16   16.81
  11  -2   1  -48.90   19.61
  -2  -9   1    5.79   12.17
  -9  11   1   14.40   17.14
  -9  11   1   -6.01   13.57
   8 -11  -1   16.54   19.65
   8 -11  -1   24.28   18.86
 -11   3  -1   85.84   20.51
 -11   3  -1   51.44   14.28
  -8  11   1   58.81   18.39
  -3  -8   1   40.55   12.88
  -8  11   1   50.05   20.68
 -11   4  -1   21.00   12.98
   7 -11  -1   -8.98   16.02
   7 -11  -1  -17.17   15.73
 -11   4  -1    3.04   16.97
  -7  11   1   22.04   20.38
  -7  11   1   11.67   13.70
  -7  11   1   28.67   16.22
  -4  -7   1   11.13   10.91
  -4  -7   1   16.56   12.32
 -11   5  -1   63.34   16.25
 -11   5  -1   42.50   20.17
   6 -11  -1   61.08   19.06
   6 -11  -1   53.10   17.16
  -6  11   1   76.70   16.71
  -6  11   1   64.62   20.30
  -6  11   1   71.64   22.10
  -5  -6   1   45.86   12.89
  -5  -6   1   58.11   12.91
 -11   6  -1   51.75   20.14
 -11   6  -1   69.08   16.84
   5 -11  -1   62.88   18.12
  -5  11   1   63.21   14.70
  -6  -5   1   59.84   13.20
  -6  -5   1   69.92   12.89
  -5  11   1   65.45   20.80
  -5  11   1   26.48   15.14
 -11   7  -1    6.54   14.58
   4 -11  -1    4.39   15.21
 -11   7  -1    4.35   18.90
  -4  11   1   24.32   16.87
  -7  -4   1    4.83    9.52
  -7  -4   1    6.93   10.59
  -4  11   1    2.05   11.95
  -4  11   1   29.64   11.67
 -11   8  -1   58.66   18.47
 -11   8  -1   75.19   21.22
   3 -11  -1   32.27   18.64
  -8  -3   1   61.09   11.71
  -3  11   1   51.37   16.67
 -11   9  -1    4.73   14.52
 -11   9  -1   10.22   19.86
   2 -11  -1  -17.71   14.29
  -9  -2   1   -8.56    8.59
  -9  -2   1    7.27    9.78
  -9  -2   1    6.99   12.38
 -11  10  -1   15.05   19.78
 -11  10  -1   24.83   18.06
   1 -11  -1   10.42   14.12
 -10  -1   1  -20.01   18.31
 -10  -1   1    2.08    9.00
 -10  -1   1   -2.49   12.98
 -11  11  -1   -8.28   22.65
 -11  11  -1   22.45   19.60
   0 -11  -1   -3.13   14.07
 -11   0   1   -4.06   10.50
 -11   0   1   14.97   14.94
 -11  12  -1  -28.57   17.35
 -11  12  -1   -4.63   18.78
  -1 -11  -1   -2.15   14.47
 -12   1   1   39.59   18.41
 -12   1   1    5.37   11.91
  -2 -11  -1    4.41   15.97
 -11  13  -1   -3.52   17.94
 -13   2   1    5.04   12.03
 -13   2   1   23.00   18.57
 -11  14  -1   22.30   23.63
  -3 -11  -1   -2.84   15.91
 -14   3   1   -1.04   12.82
 -14   3   1   14.12   19.48
  -4 -11  -1  -20.14   14.89
 -15   4   1   18.33   20.47
 -15   4   1    1.97   13.73
 -12  -2  -1  -14.05   12.46
 -14  12   1   -4.05   21.19
   2 -14   1   -0.76   18.17
 -14  12   1   60.84   27.61
 -12  -1  -1   -1.05   12.27
 -13  12   1   10.96   25.66
   1 -13   1  -32.71   14.33
 -13  12   1   64.31   27.52
 -12   0  -1    6.88   12.75
 -12  12   1   28.35   23.40
   0 -12   1   27.19   17.84
 -12  12   1    3.56   24.62
 -12   1  -1   -1.72   12.75
 -12   1  -1   -0.49   15.80
  -1 -11   1  -11.93   12.87
 -11  12   1  -18.81   17.68
 -11  12   1  -20.52   21.74
 -12   2  -1   -3.98   15.86
 -12   2  -1    4.53   12.41
  -2 -10   1   15.30   14.37
 -10  12   1   -8.36   21.59
 -10  12   1   -1.87   17.08
 -12   3  -1   14.14   12.44
 -12   3  -1   22.74   17.50
  -3  -9   1   -0.23   12.01
  -9  12   1   36.89   18.31
  -9  12   1   38.85   23.16
 -12   4  -1   -4.34   19.25
   8 -12  -1   -2.28   18.05
 -12   4  -1   -2.81   17.11
  -8  12   1   23.47   15.93
  -4  -8   1    4.15   11.86
  -8  12   1   -6.09   20.44
 -12   5  -1   20.36   18.66
 -12   5  -1   -8.01   13.07
   7 -12  -1   -0.54   18.30
  -5  -7   1    8.95   13.92
  -7  12   1    9.54   15.58
  -7  12   1   -4.79   21.43
 -12   6  -1   14.10   15.28
 -12   6  -1  -13.56   16.89
   6 -12  -1   -0.63   16.33
  -6  12   1    4.50   13.97
  -6  -6   1    8.74   10.83
  -6  -6   1    2.50   12.71
   5 -12  -1  -11.51   14.51
 -12   7  -1   15.98   15.36
 -12   7  -1   22.80   21.96
  -5  12   1    4.83   17.97
  -5  12   1  -10.27   12.43
  -7  -5   1  -17.23   10.66
  -7  -5   1   -7.13   11.24
   4 -12  -1   -8.32   15.10
 -12   8  -1   -6.28   19.69
 -12   8  -1   -7.38   16.69
  -8  -4   1   -4.22   10.77
 -12   9  -1   -7.70   18.78
   3 -12  -1   -9.76   15.76
 -12   9  -1   17.94   19.69
  -9  -3   1   11.09   10.37
  -9  -3   1   13.09   12.52
 -12  10  -1   13.78   19.12
   2 -12  -1   10.34   21.96
 -12  10  -1    1.51   20.10
 -10  -2   1  -14.43    9.64
 -12  11  -1   24.69   21.21
   1 -12  -1   19.43   16.19
 -12  11  -1    5.84   16.02
 -11  -1   1   20.24   11.21
 -12  12  -1  -11.66   25.34
 -12  12  -1    7.12   19.57
   0 -12  -1    8.42   15.81
 -12   0   1   -1.43   11.34
  -1 -12  -1   31.03   16.85
 -12  13  -1   25.32   21.23
 -13   1   1   -3.95   11.14
 -12  14  -1   38.51   25.13
  -2 -12  -1   -1.28   16.11
 -14   2   1   12.85   12.11
 -13  -1  -1    1.64   13.52
 -14  13   1   10.47   26.73
   1 -14   1  -14.02   19.54
 -14  13   1  -12.38   22.12
 -13   0  -1   -1.66   13.44
 -13  13   1   22.29   24.64
 -13  13   1  -23.91   16.88
   0 -13   1    8.54   18.29
 -13   1  -1   -1.87   13.64
 -12  13   1   41.07   24.18
  -1 -12   1   -8.98   14.98
 -12  13   1   15.96   27.51
 -13   2  -1    4.61   18.17
 -13   2  -1   -0.25   13.79
 -11  13   1   36.19   22.08
 -11  13   1    5.66   19.27
  -2 -11   1   14.41   14.58
 -13   3  -1   59.40   16.83
 -13   3  -1   50.45   19.91
 -10  13   1   12.45   19.71
  -3 -10   1   19.59   13.67
 -13   4  -1   10.23   19.14
 -13   4  -1    2.82   13.20
  -4  -9   1   -4.87   12.10
  -9  13   1   21.29   18.64
   8 -13  -1   -3.92   17.98
 -13   5  -1   16.48   14.13
 -13   5  -1   20.53   19.98
  -5  -8   1   12.76   11.79
  -8  13   1    4.34   16.95
 -13   6  -1   61.19   22.88
 -13   6  -1   24.09   16.68
   7 -13  -1   74.68   20.73
  -6  -7   1   54.88   13.72
  -7  13   1   58.96   18.04
 -13   7  -1   67.38   19.46
   6 -13  -1   43.42   19.18
 -13   7  -1   59.38   22.79
  -7  -6   1   65.26   13.44
 -13   8  -1   -3.96   17.47
 -13   8  -1   32.69   22.07
   5 -13  -1   -7.80   16.79
  -8  -5   1    3.90    9.80
 -13   9  -1   15.46   20.29
   4 -13  -1    5.00   20.06
 -13   9  -1   -2.05   16.33
  -9  -4   1  -12.69    9.63
 -13  10  -1   27.26   23.18
   3 -13  -1   41.07   19.36
 -13  10  -1   28.06   22.24
 -10  -3   1   24.97   11.13
   2 -13  -1    6.90   19.73
 -13  11  -1  -19.96   19.64
 -13  11  -1  -15.07   19.08
 -11  -2   1    7.18   10.62
 -13  12  -1   10.56   17.45
   1 -13  -1   33.89   19.15
 -13  12  -1   51.15   24.51
 -12  -1   1   13.19   12.02
   0 -13  -1  -35.99   15.56
 -13  13  -1   12.78   21.67
 -13   0   1   -3.07   11.24
  -1 -13  -1   31.46   19.06
 -13  14  -1   39.03   28.40
 -14   1   1   -0.50   12.08
 -14   1  -1    1.45   13.12
  -1 -13   1    3.00   18.36
 -13  14   1   47.42   27.35
 -14   2  -1    4.96   13.65
 -12  14   1   55.53   25.49
  -2 -12   1   12.15   18.07
 -14   3  -1    1.55   13.33
 -14   3  -1   26.96   19.24
 -11  14   1   29.81   23.93
  -3 -11   1   -3.33   14.63
 -14   4  -1   20.03   19.02
 -14   4  -1   -0.59   13.76
  -4 -10   1   -6.03   13.54
 -10  14   1   19.04   20.84
 -14   5  -1   23.25   20.44
 -14   5  -1   12.35   14.59
  -5  -9   1   18.07   13.30
 -14   6  -1    1.63   19.85
 -14   6  -1   -0.81   15.56
  -6  -8   1  -20.92   11.04
 -14   7  -1  -10.53   15.76
 -14   7  -1   22.02   20.60
   7 -14  -1   -5.66   21.95
  -7  -7   1   -1.23   10.88
   6 -14  -1   -0.48   20.46
 -14   8  -1   15.73   21.50
 -14   8  -1   12.96   18.47
  -8  -6   1   -4.78    9.88
 -14   9  -1   28.50   21.01
 -14   9  -1    6.97   20.50
   5 -14  -1   10.57   22.80
  -9  -5   1    6.46   11.05
 -14  10  -1   66.05   24.96
 -14  10  -1  -15.76   21.56
   4 -14  -1    1.51   18.16
 -10  -4   1    4.50   10.48
 -14  11  -1    3.39   22.89
 -14  11  -1   34.69   23.23
   3 -14  -1   -0.18   20.61
 -11  -3   1   29.01   11.68
   2 -14  -1  -11.93   18.41
 -14  12  -1   36.39   22.88
 -14  12  -1   11.83   21.29
 -14  13  -1   92.48   31.91
   1 -14  -1    5.02   21.36
 -15   4  -1    8.88   20.54
 -15   4  -1  -24.78   12.93
  -4 -11   1    7.79   15.46
 -15   5  -1   24.41   20.95
 -15   6  -1   54.89   21.87
 -15   6  -1   -2.34   15.28
  -6  -9   1    3.68   13.21
 -15   7  -1   24.78   21.22
 -15   7  -1   10.83   16.98
  -7  -8   1  -18.45   11.50
 -15   8  -1    7.71   18.09
 -15   8  -1   52.57   25.20
  -8  -7   1   11.93   11.63
   6 -15  -1  -19.73   21.53
 -15   9  -1   51.85   26.28
 -15   9  -1    4.47   18.92
  -9  -6   1    4.14   11.18
   5 -15  -1   11.16   21.11
 -15  10  -1    6.83   20.29
   4 -15  -1   -9.11   19.10
 -15  11  -1   23.90   26.96
 -15  11  -1    5.04   21.37
   1  -1  -2  130.55   10.75
   1  -1  -2  142.42   12.18
   0   1  -2  136.72   10.04
  -1   0  -2  149.80   12.94
  -1   0  -2  145.97   11.38
   0   1  -2  141.09   11.09
  -1   0  -2  147.43   12.27
   1  -1  -2  146.83   10.90
   0   1  -2  136.65   10.15
   0  -1   2  150.76   13.76
  -1   1   2  138.17   11.11
   1   0   2  139.39   11.21
   0  -1   2  141.52   10.34
   1   0   2  129.01   11.52
  -1   1   2  131.45   12.26
   1   0   2  127.59   10.85
  -1   1  -2  140.46   11.43
  -1   1  -2  154.82   12.74
   0  -1  -2  149.16   12.31
   0  -1  -2  135.53   11.31
   1   0  -2  151.41   11.53
  -1   1  -2  143.60   12.12
  -1   0   2  134.37   12.30
   0   1   2  133.86   12.86
   1  -1   2  155.64   11.58
   0   1   2  158.58   11.69
   1  -1   2  141.77   12.24
   2  -1  -2  340.80   23.97
  -1   2  -2  356.45   24.97
  -1   2  -2  348.00   25.12
  -1  -1  -2  374.76   24.82
  -1   2  -2  397.17   25.52
   2  -1  -2  388.79   24.04
  -1  -1  -2  380.29   23.68
   2  -1  -2  355.77   25.96
   1  -2   2  382.53   25.41
  -2   1   2  343.61   24.03
  -2   1   2  389.62   24.19
   1   1   2  367.60   24.87
   1   1   2  372.91   23.43
   1  -2   2  359.43   25.16
   1  -2   2  353.31   24.75
   1   1   2  364.97   24.77
  -2   1   2  396.93   26.88
  -2  -1  -2  261.38   19.90
  -1   3  -2  255.58   20.57
  -2  -1  -2  290.88   20.22
   3  -2  -2  234.06   21.40
   3  -2  -2  284.22   20.33
  -1   3  -2  273.36   21.15
   3  -2  -2  265.73   23.90
  -1   3  -2  264.27   20.22
   2   1   2  257.11   19.29
  -3   2   2  227.98   23.14
  -3   2   2  248.75   20.41
   1  -3   2  275.25   20.57
   1  -3   2  246.55   21.02
   2   1   2  243.53   21.53
   2   1   2  237.58   19.91
  -2   0  -2  898.81   55.75
   2  -2  -2  901.01   55.54
   2  -2  -2  903.26   56.32
   0   2  -2  890.81   54.64
  -2   0  -2  897.89   55.35
   0   2  -2  902.56   54.87
   0   2  -2  901.74   54.92
   2  -2  -2  874.93   55.51
  -2   2   2  873.06   55.32
   0  -2   2  919.08   54.68
   2   0   2  900.47   55.57
   2   0   2  928.01   55.38
   0  -2   2  886.85   55.00
   0  -2   2  864.00   54.95
   2   0   2  855.10   55.18
  -2   2   2  867.43   56.35
  -2   2   2  919.65   55.70
   1   1  -2  366.80   24.10
  -2   1  -2  372.67   26.55
   1   1  -2  356.30   22.82
   1  -2  -2  377.73   25.50
   1  -2  -2  386.34   25.17
  -2   1  -2  346.15   24.94
   1   1  -2  372.48   22.86
  -2   1  -2  348.08   24.83
   1  -2  -2  351.43   24.74
   2  -1   2  380.37   26.22
  -1  -1   2  391.87   22.99
  -1  -1   2  376.52   22.97
  -1   2   2  363.71   24.94
  -1   2   2  346.08   25.01
  -1   2   2  367.17   25.29
   2  -1   2  352.89   24.93
   2   0  -2  908.94   53.75
   0  -2  -2  840.92   55.57
  -2   2  -2  929.18   55.92
   2   0  -2  890.79   55.66
   0  -2  -2  873.28   53.84
  -2   2  -2  908.81   55.64
  -2   2  -2  884.30   56.53
   2   0  -2  916.05   53.75
   0  -2  -2  872.03   55.49
  -2   0   2  910.50   53.83
   2  -2   2  874.06   55.75
   2  -2   2  892.77   56.26
  -2   0   2  886.68   53.78
   2  -2   2  932.24   55.89
   0   2   2  908.03   55.58
   0   2   2  853.87   55.44
  -2   0   2  859.84   55.72
  -1  -2  -2  224.10   20.62
   3  -1  -2  260.60   19.18
  -1  -2  -2  263.54   16.93
  -2   3  -2  240.30   21.41
  -2   3  -2  259.83   21.56
   3  -1  -2  257.60   19.18
  -2   3  -2  270.45   22.43
   3  -1  -2  243.09   22.86
   2  -3   2  297.88   21.88
  -3   1   2  292.44   23.60
  -3   1   2  271.47   19.32
   2  -3   2  256.25   21.81
  -3   1   2  254.62   19.21
   1   2   2  274.79   20.63
   2  -3   2  271.01   22.45
   1   2   2  264.45   16.61
   1   2   2  271.73   20.81
  -2  -2  -2  686.61   48.75
  -2   4  -2  733.25   48.20
   4  -2  -2  788.43   47.35
  -2   4  -2  772.98   48.58
  -2  -2  -2  727.96   45.72
   4  -2  -2  750.52   47.29
  -2  -2  -2  739.96   47.47
   4  -2  -2  731.93   49.87
  -2   4  -2  721.38   48.35
   2   2   2  764.19   47.57
   2   2   2  739.76   47.52
   2   2   2  768.40   45.57
  -4   2   2  771.06   47.51
   2  -4   2  722.70   48.08
  -4   2   2  731.14   50.19
  -4   2   2  712.22   47.22
   2  -4   2  720.53   48.79
   5  -3  -2  382.81   33.50
  -3  -2  -2  404.56   29.53
   5  -3  -2  443.40   30.68
  -3  -2  -2  462.34   29.81
  -3  -2  -2  411.98   28.40
  -2   5  -2  438.30   30.65
  -2   5  -2  430.12   30.92
   5  -3  -2  404.27   29.98
  -2   5  -2  426.80   30.68
  -5   3   2  439.81   32.33
   2  -5   2  442.59   31.38
  -5   3   2  379.36   30.22
   3   2   2  435.86   29.69
   2  -5   2  406.43   30.15
   3   2   2  433.68   28.19
   2  -5   2  429.42   31.72
  -5   3   2  410.55   33.93
   3   2   2  408.08   29.71
   4  -3  -2   12.13    7.11
  -3  -1  -2   16.49    7.96
  -1   4  -2   24.53    8.40
  -3  -1  -2   35.33    7.96
  -1   4  -2    9.70    8.57
   4  -3  -2   13.24    9.88
   4  -3  -2   14.89    7.73
  -3  -1  -2    1.67    7.59
  -1   4  -2   22.24    7.63
  -4   3   2   23.12    8.20
   1  -4   2   15.20    7.43
   1  -4   2    9.86    8.24
   3   1   2   -4.40    6.30
   3   1   2   25.27    8.17
   3   1   2   22.29    7.05
   1  -4   2    2.28    4.66
  -4   3   2   -2.46   10.22
   3  -3  -2  300.32   21.93
   3  -3  -2  312.00   23.88
  -3   0  -2  247.08   20.33
  -3   0  -2  241.15   22.09
   0   3  -2  211.33   19.86
   3  -3  -2  314.81   21.73
   0   3  -2  258.73   19.92
   0   3  -2  216.08   18.31
  -3   3   2  323.56   23.95
  -3   3   2  289.01   21.61
   3   0   2  234.01   21.59
   0  -3   2  239.67   20.03
   3   0   2  224.29   20.46
   0  -3   2  255.07   18.50
   3   0   2  265.92   20.31
   0  -3   2  239.31   20.29
  -3   1  -2  266.09   21.00
   2  -3  -2  252.86   22.13
   1   2  -2  272.56   18.50
   2  -3  -2  267.52   21.71
   1   2  -2  263.37   18.82
   2  -3  -2  270.76   21.59
  -3   1  -2  291.40   24.40
  -2   3   2  238.59   21.62
   3  -1   2  255.87   20.57
  -1  -2   2  246.20   18.78
  -1  -2   2  277.44   19.10
   3  -1   2  272.05   20.97
  -2   3   2  254.23   22.02
   3  -1   2  251.78   22.64
  -3   2  -2  263.54   21.46
   1  -3  -2  248.27   21.35
   1  -3  -2  245.15   21.36
   2   1  -2  260.24   17.39
  -3   2  -2  254.01   21.48
   2   1  -2  272.12   17.45
   2   1  -2  254.48   19.94
  -3   2  -2  270.93   24.07
   1  -3  -2  261.51   19.68
  -1   3   2  259.90   21.06
   3  -2   2  267.30   21.05
  -2  -1   2  249.99   17.29
  -2  -1   2  243.96   17.53
  -2  -1   2  252.76   19.97
  -1   3   2  259.37   19.52
   3  -2   2  247.32   23.54
   3  -2   2  250.61   20.97
  -1   3   2  261.32   21.47
   3   0  -2  245.24   17.11
  -3   3  -2  251.41   21.48
   0  -3  -2  241.15   16.06
   3   0  -2  217.78   21.37
  -3   3  -2  233.50   20.84
   0  -3  -2  233.64   20.53
  -3   3  -2  200.46   23.01
   0  -3  -2  224.94   20.78
   3   0  -2  240.62   17.14
  -3   0   2  229.56   17.20
   3  -3   2  223.53   21.34
   3  -3   2  244.86   21.47
   0   3   2  258.31   20.99
  -3   0   2  222.33   21.43
   3  -3   2  241.51   22.96
  -3   0   2  264.70   17.25
   0   3   2  240.76   21.03
   4  -1  -2   21.94    6.40
  -3   4  -2   32.34   11.43
   4  -1  -2   21.32    7.18
  -3   4  -2   21.10   10.58
   4  -1  -2   23.55   10.55
  -1  -3  -2   21.76    8.71
  -3   4  -2   16.26   10.04
  -4   1   2   16.31    6.66
   1   3   2    3.17    8.44
   1   3   2    0.45    7.12
  -4   1   2   14.26    6.92
   3  -4   2    4.03   10.23
  -4   1   2   22.56   10.83
   3  -4   2   40.87   10.96
   3  -4   2   20.38   10.04
  -2  -3  -2  423.54   29.73
  -3   5  -2  407.22   31.61
   5  -2  -2  391.29   32.80
   5  -2  -2  415.88   29.12
   5  -2  -2  438.41   29.18
  -3   5  -2  442.11   31.49
  -3   5  -2  432.36   31.63
   3  -5   2  403.50   31.39
  -5   2   2  439.70   33.28
   2   3   2  409.24   29.72
   3  -5   2  350.29   31.23
  -5   2   2  448.08   29.45
  -5   2   2  407.28   29.05
   3  -5   2  444.09   31.93
   2   3   2  392.45   29.68
  -3   6  -2   13.11    9.07
  -3  -3  -2   11.54    7.33
   6  -3  -2   19.83   12.37
  -3   6  -2   19.58   10.42
  -3   6  -2   22.88    9.79
  -3  -3  -2   40.62    9.82
   6  -3  -2    9.60    7.92
  -3  -3  -2   11.49    5.20
   6  -3  -2   25.11    9.36
   3  -6   2   10.88   10.94
   3  -6   2   11.60    9.49
  -6   3   2   24.43    8.94
   3  -6   2   15.77    8.43
   3   3   2   23.77    8.64
  -6   3   2    6.64   12.48
  -6   3   2   15.17    8.49
   3   3   2   11.42    5.13
   3   3   2   26.91    9.02
  -3   7  -2   65.82   12.73
  -3   7  -2   44.89   13.37
   7  -4  -2   59.52   16.42
   7  -4  -2   45.85   11.31
  -4  -3  -2   70.74    8.76
   7  -4  -2   56.27   11.25
  -3   7  -2   80.10   14.08
  -4  -3  -2   57.95   10.59
  -4  -3  -2   69.68   12.02
   3  -7   2   67.61   13.47
   4   3   2   73.93    9.07
   4   3   2   68.63   11.57
  -7   4   2   67.64   14.17
  -7   4   2   68.45   16.56
  -7   4   2   47.49   10.21
   4   3   2   78.40   12.57
   3  -7   2   50.15   11.75
   3  -7   2   78.69   12.64
  -4  -2  -2  113.60   13.61
  -4  -2  -2  118.75   13.85
   6  -4  -2  159.06   16.65
  -4  -2  -2  140.06   13.33
  -2   6  -2  131.87   16.46
  -2   6  -2  132.68   14.19
   6  -4  -2  132.53   18.57
  -2   6  -2  123.66   14.95
   2  -6   2  127.87   13.93
   2  -6   2  133.39   16.46
   4   2   2  150.41   15.12
  -6   4   2  131.71   19.25
   2  -6   2  109.68   15.14
   4   2   2  123.78   13.85
   4   2   2  142.60   14.77
  -6   4   2  126.95   15.88
  -1   5  -2   71.05    9.18
  -4  -1  -2   67.53   11.03
  -4  -1  -2   59.32    9.35
  -1   5  -2   37.82    8.75
   5  -4  -2   55.16   12.87
   5  -4  -2   61.37   10.88
  -1   5  -2   39.28    9.86
  -4  -1  -2   70.44    9.29
   5  -4  -2   77.80   12.46
  -5   4   2   52.58   13.22
   4   1   2   70.82   10.77
   1  -5   2   60.15    8.90
   4   1   2   52.34   10.32
   1  -5   2   72.34   13.01
  -5   4   2   48.04    9.42
  -5   4   2   69.78   10.86
   4   1   2   49.40    8.75
  -4   0  -2  614.47   43.76
   0   4  -2  680.51   42.21
   4  -4  -2  698.61   45.09
   4  -4  -2  700.79   46.70
   4  -4  -2  696.79   45.63
  -4   0  -2  689.72   45.37
  -4   0  -2  675.98   44.03
   0   4  -2  667.92   44.06
   0   4  -2  686.65   44.14
   4   0   2  662.64   45.03
   0  -4   2  717.42   42.22
  -4   4   2  658.99   46.78
   4   0   2  666.92   43.94
   4   0   2  663.53   43.91
  -4   4   2  697.93   45.20
   0  -4   2  666.54   44.14
   0  -4   2  628.15   44.22
  -4   4   2  684.63   45.39
   3  -4  -2   14.18    9.75
   3  -4  -2   16.75    9.66
  -4   1  -2   28.80   10.20
   1   3  -2   23.29    5.48
   1   3  -2   13.81    6.93
   3  -4  -2   12.46   10.43
  -4   1  -2   12.75    7.37
   4  -1   2   10.44   10.38
   4  -1   2    0.62    7.90
  -3   4   2   12.40    8.16
  -3   4   2    1.94    7.41
  -1  -3   2   17.60    7.34
  -1  -3   2   17.40    6.59
  -3   4   2    5.76    9.58
   2   2  -2  766.71   46.59
   2  -4  -2  753.93   48.42
   2  -4  -2  780.86   49.52
   2   2  -2  758.84   46.91
   2   2  -2  751.86   46.45
  -4   2  -2  742.82   50.41
  -4   2  -2  800.96   48.89
  -4   2  -2  722.33   48.44
   2  -4  -2  734.59   49.34
  -2  -2   2  790.87   46.71
  -2  -2   2  720.89   46.45
   4  -2   2  715.35   48.35
   4  -2   2  748.45   50.43
  -2   4   2  736.92   49.27
  -2   4   2  748.46   48.39
   4  -2   2  722.43   48.42
  -2   4   2  719.70   49.08
   1  -4  -2    7.38    7.07
   3   1  -2   17.03    5.77
  -4   3  -2   12.84    7.94
   3   1  -2   22.71    8.31
  -4   3  -2   36.57   13.17
   1  -4  -2    3.70    7.87
   1  -4  -2   20.05    7.28
   3   1  -2   16.53    5.52
  -4   3  -2   21.42    9.29
  -1   4   2   20.32    6.66
   4  -3   2   21.63   10.79
  -3  -1   2    7.99    5.77
  -3  -1   2   22.40    5.71
  -1   4   2   22.92    8.45
   4  -3   2   19.49    9.37
  -3  -1   2   23.04    8.30
  -1   4   2   -2.41    7.53
   4  -3   2   19.66    9.33
   0  -4  -2  656.46   45.51
   4   0  -2  688.89   43.06
   4   0  -2  691.08   43.14
  -4   4  -2  710.97   46.15
   4   0  -2  662.44   45.98
  -4   4  -2  669.53   46.40
  -4   4  -2  690.64   47.88
   0  -4  -2  684.80   41.60
   4  -4   2  677.20   46.10
  -4   0   2  726.28   46.37
   0   4   2  676.54   45.58
  -4   0   2  743.35   43.30
   4  -4   2  714.62   47.88
   4  -4   2  641.60   45.85
   0   4   2  663.92   45.65
  -4   0   2  677.86   43.14
  -4   5  -2   74.42   13.28
  -4   5  -2   77.51   14.26
  -4   5  -2   63.40   11.92
  -1  -4  -2   67.99   10.09
   5  -1  -2   49.09    9.00
   5  -1  -2   74.21   13.09
   5  -1  -2   55.20    8.30
   4  -5   2   49.84   12.97
  -5   1   2   71.96    9.24
  -5   1   2   80.94   13.63
  -5   1   2   66.49    8.91
   4  -5   2   96.86   14.35
   1   4   2   54.49   10.54
   4  -5   2   80.09   14.27
   1   4   2   64.41   11.29
  -2  -4  -2  127.13   15.48
  -4   6  -2  121.35   16.65
  -4   6  -2  125.18   16.94
  -2  -4  -2  142.11   15.13
   6  -2  -2  125.50   13.39
   6  -2  -2  154.96   14.15
  -4   6  -2  123.48   16.12
  -6   2   2   97.53   12.72
  -6   2   2  135.31   14.14
   2   4   2  152.97   15.91
   4  -6   2  148.53   17.28
   2   4   2  114.17   13.46
   4  -6   2  154.32   18.08
  -6   2   2  145.69   18.25
   4  -6   2  152.16   18.37
   7  -3  -2   71.37   12.47
   7  -3  -2   48.36   15.55
  -4   7  -2   87.68   15.09
   7  -3  -2   69.11   10.94
  -4   7  -2   85.71   15.74
  -3  -4  -2   61.79   11.30
  -3  -4  -2   81.51   12.63
  -7   3   2   53.68   10.69
  -7   3   2   63.12   12.21
   4  -7   2   74.77   13.88
   3   4   2   47.04   10.41
  -7   3   2   98.04   24.50
   4  -7   2   79.97   16.07
   3   4   2   78.26   12.06
   4  -7   2   82.54   16.81
  -4  -4  -2    3.46    9.14
  -4   8  -2   -2.76    8.65
  -4  -4  -2   15.37    9.73
   8  -4  -2    0.00    8.83
   8  -4  -2   22.95   11.14
  -4   8  -2   -7.33   12.16
   8  -4  -2   36.61   17.28
  -4   8  -2   17.86   11.99
  -8   4   2  -16.54   15.47
   4   4   2   13.64    9.53
   4  -8   2   -2.92   10.96
  -8   4   2   11.86   10.09
   4   4   2   -9.87    9.00
   4  -8   2    8.50    7.99
   4  -8   2    8.15   11.52
  -8   4   2    3.98   10.03
   9  -5  -2   17.33   16.92
   9  -5  -2   -2.30   10.11
  -4   9  -2    5.82   12.88
  -4   9  -2  -14.78   11.64
  -4   9  -2    8.10   11.97
   9  -5  -2    4.66    9.26
  -5  -4  -2    4.05    8.80
  -5  -4  -2   -8.81    9.66
   5   4   2    2.89    9.10
   4  -9   2   -1.53   10.20
  -9   5   2    7.71   10.40
   4  -9   2   21.16   13.95
  -9   5   2   18.30   16.95
   5   4   2    9.07    9.51
   4  -9   2  -12.01   13.47
   5   4   2    2.80    6.04
  -9   5   2    3.78   10.14
   8  -5  -2    8.56   10.16
  -3   8  -2   21.05   12.67
  -5  -3  -2   40.13    9.92
  -3   8  -2   35.29   12.63
   8  -5  -2    9.40   15.48
   8  -5  -2   58.49   20.52
  -3   8  -2   18.33   10.59
  -5  -3  -2    6.49    7.75
  -5  -3  -2   29.00   10.03
   5   3   2   10.00    8.19
   3  -8   2   32.62   10.88
   5   3   2    5.24    9.50
   3  -8   2   21.29   12.54
   3  -8   2    7.80   11.03
  -8   5   2   31.17   17.70
  -8   5   2   16.99   10.53
   5   3   2   27.13    9.97
  -2   7  -2  269.24   23.81
  -5  -2  -2  245.41   21.48
  -5  -2  -2  209.82   20.33
  -5  -2  -2  236.23   21.53
  -2   7  -2  229.50   21.60
  -2   7  -2  224.86   23.27
   7  -5  -2  251.80   26.94
   7  -5  -2  235.09   23.49
   7  -5  -2  243.77   22.88
   2  -7   2  224.40   20.96
   5   2   2  250.65   21.42
  -7   5   2  176.82   23.23
  -7   5   2  205.90   21.84
   2  -7   2  202.58   21.96
   2  -7   2  229.11   23.29
   5   2   2  278.93   21.32
   5   2   2  212.82   20.69
   6  -5  -2    0.95   13.56
   6  -5  -2   39.73   13.90
  -1   6  -2   10.43    8.00
  -1   6  -2   13.51    9.17
  -5  -1  -2   12.25    8.44
  -5  -1  -2   34.82    9.70
  -5  -1  -2   13.97    9.84
   6  -5  -2    5.13   10.50
  -1   6  -2    6.47    7.57
   5   1   2   17.30    7.81
   1  -6   2   -3.56   12.08
   1  -6   2    5.46    6.65
  -6   5   2   19.37    8.69
  -6   5   2    9.65    9.72
   5   1   2   41.82    9.60
  -6   5   2   10.84   12.55
   1  -6   2   26.89    9.72
   5   1   2   26.83   10.33
   0   5  -2  454.25   27.62
   0   5  -2  370.60   30.16
  -5   0  -2  452.59   30.09
   5  -5  -2  373.29   32.12
   5  -5  -2  418.97   34.44
   5  -5  -2  385.56   31.38
   0   5  -2  369.21   29.94
  -5   0  -2  450.79   30.09
  -5   0  -2  418.87   32.32
   0  -5   2  407.90   30.45
   5   0   2  445.51   31.66
   0  -5   2  408.79   27.11
  -5   5   2  436.71   32.38
   5   0   2  414.29   31.68
  -5   5   2  422.76   31.91
   0  -5   2  428.85   30.72
   5   0   2  388.82   29.94
  -5   5   2  428.40   33.90
   4  -5  -2   79.38   12.66
   4  -5  -2   61.94   12.51
  -5   1  -2   49.60   13.04
  -5   1  -2   65.65   10.50
   1   4  -2   51.39    9.60
   4  -5  -2   97.39   14.10
  -5   1  -2   49.05    9.17
   1   4  -2   58.17    6.65
   5  -1   2   82.91   11.76
  -4   5   2   44.57   12.86
  -4   5   2   81.81   12.00
  -1  -4   2   63.43    9.52
   5  -1   2   70.27   13.36
  -4   5   2   46.22   11.92
   5  -1   2   52.73    9.46
  -1  -4   2   41.97    9.05
   2   3  -2  432.19   27.94
   2   3  -2  390.40   27.75
  -5   2  -2  420.35   30.02
   2   3  -2  410.36   26.94
   3  -5  -2  390.05   31.09
   3  -5  -2  393.98   31.10
   3  -5  -2  409.32   31.53
  -5   2  -2  432.44   33.25
   2   3  -2  411.84   26.85
   5  -2   2  414.69   30.05
  -2  -3   2  411.95   27.93
  -2  -3   2  398.19   27.86
  -3   5   2  411.83   30.90
   5  -2   2  397.83   29.57
   5  -2   2  440.20   33.61
  -3   5   2  369.06   30.62
  -3   5   2  416.51   31.38
   3   2  -2  405.04   27.25
   2  -5  -2  420.24   29.63
  -5   3  -2  377.30   30.46
   2  -5  -2  433.59   31.66
  -5   3  -2  410.47   30.55
   3   2  -2  419.84   27.35
  -5   3  -2  410.24   33.13
   2  -5  -2  371.36   31.06
   3   2  -2  439.49   28.56
  -2   5   2  404.12   29.16
  -2   5   2  409.20   30.92
   5  -3   2  421.52   30.52
   5  -3   2  400.66   33.15
  -3  -2   2  394.66   27.28
   5  -3   2  433.50   30.98
   4   1  -2   64.92    7.97
  -5   4  -2   44.77   11.34
  -5   4  -2   66.77   13.45
   4   1  -2   48.99   10.30
   1  -5  -2   55.58   12.22
   1  -5  -2   50.26   11.14
  -5   4  -2   67.74   14.59
   1  -5  -2   53.20    8.04
   4   1  -2   65.04    7.69
  -1   5   2   42.47   10.03
  -4  -1   2   58.24    7.56
   5  -4   2   36.34   10.31
   5  -4   2   55.41   14.02
  -4  -1   2   69.15   10.84
  -1   5   2   50.76   11.09
  -4  -1   2   59.58    7.91
   5  -4   2   45.40    9.72
  -1   5   2   68.95    8.02
   5   0  -2  438.14   28.51
   0  -5  -2  410.65   31.94
   5   0  -2  435.13   32.26
   0  -5  -2  418.93   31.15
  -5   5  -2  438.05   32.57
  -5   5  -2  439.98   32.59
  -5   5  -2  431.65   34.30
   0   5   2  407.10   31.33
  -5   0   2  393.53   32.44
   5  -5   2  409.39   32.20
  -5   0   2  415.95   28.53
   0   5   2  415.10   31.50
   5  -5   2  428.08   33.12
   5  -5   2  374.55   33.79
  -5   0   2  437.40   28.72
   6  -1  -2    2.00   11.70
  -5   6  -2   14.53   11.14
  -5   6  -2   37.31   11.12
  -5   6  -2   40.58   13.31
   6  -1  -2   20.67    8.21
  -1  -5  -2   14.33   10.70
   6  -1  -2   18.96    7.43
   5  -6   2   21.66   10.96
  -6   1   2   26.72    7.84
  -6   1   2    2.00   12.47
   1   5   2   19.11    8.88
  -6   1   2   12.60    7.96
   1   5   2   11.30   10.42
   5  -6   2   26.86   12.72
  -5   7  -2  180.43   20.99
  -5   7  -2  216.78   23.24
  -2  -5  -2  246.25   22.47
   7  -2  -2  216.80   20.24
  -2  -5  -2  223.64   21.90
  -5   7  -2  173.01   22.22
   7  -2  -2  222.40   24.88
   7  -2  -2  223.12   20.64
   5  -7   2  256.43   24.52
   2   5   2  239.16   22.14
   5  -7   2  224.00   23.23
  -7   2   2  214.07   20.66
   5  -7   2  319.90   27.13
  -7   2   2  230.33   20.33
   2   5   2  243.83   22.67
  -7   2   2  319.26   31.80
   8  -3  -2   25.07    9.20
  -5   8  -2    7.53   13.27
  -3  -5  -2   18.22   10.02
   8  -3  -2    5.44   15.76
  -3  -5  -2   11.69   10.33
   8  -3  -2   16.20   10.20
  -5   8  -2   -6.20   14.39
  -5   8  -2   14.52   13.08
   5  -8   2   19.56   10.91
  -8   3   2   29.97   16.29
   3   5   2    6.76    9.71
   5  -8   2   -9.22   12.20
  -8   3   2   11.09    9.68
  -8   3   2   21.36    9.64
   3   5   2   15.88   10.00
   5  -8   2   21.50   11.42
  -4  -5  -2   -2.83   10.21
   9  -4  -2   -3.94   10.41
  -5   9  -2    8.36   13.52
  -4  -5  -2  -17.07    9.69
  -5   9  -2   10.41   10.57
   9  -4  -2  -24.17   15.69
   9  -4  -2   -8.47    9.18
  -9   4   2    5.56   15.92
   5  -9   2    6.78   13.43
  -9   4   2   10.12   10.89
   5  -9   2   -7.64   12.42
  -9   4   2    0.32    9.38
   4   5   2    0.19    8.53
   5  -9   2   13.16    9.04
   4   5   2    5.60   10.13
  -5  10  -2  167.11   22.20
  -5  -5  -2  260.30   23.23
  10  -5  -2  217.46   22.76
  -5  10  -2  197.15   26.59
  -5  -5  -2  197.62   20.22
  -5  10  -2  198.84   24.46
  10  -5  -2  154.47   25.38
  10  -5  -2  245.60   24.01
 -10   5   2  237.32   23.64
   5   5   2  222.58   21.56
   5 -10   2  193.90   26.40
   5 -10   2  148.25   21.90
   5 -10   2  173.40   25.07
 -10   5   2  184.19   27.33
   5   5   2  196.67   20.32
 -10   5   2  215.06   22.35
  -5  11  -2   65.68   19.98
  -6  -5  -2   43.33   12.92
  -5  11  -2   66.44   16.13
  -6  -5  -2   37.55   12.81
  -5  11  -2   32.46   15.00
 -11   6   2   49.46   14.91
   5 -11   2   22.12   15.26
   5 -11   2   39.37   17.40
 -11   6   2   46.85   21.20
  10  -6  -2  -24.61   16.86
  -6  -4  -2   -5.93    8.96
  -6  -4  -2    8.34   10.39
  10  -6  -2   17.25   12.94
  -4  10  -2  -18.84   13.21
  -4  10  -2  -21.28   10.54
  10  -6  -2  -10.44   10.58
  -4  10  -2   -8.69   11.54
 -10   6   2   26.86   17.26
   4 -10   2    4.43   13.55
   4 -10   2   -4.15   12.85
   6   4   2   -5.97    7.28
 -10   6   2   -2.46   12.28
   6   4   2   11.84   10.67
   4 -10   2    2.13   11.82
 -10   6   2   26.82   13.53
   6   4   2   -4.38   10.48
   9  -6  -2    8.07   12.17
  -6  -3  -2    0.60    9.52
  -6  -3  -2   13.15    9.40
  -6  -3  -2   -9.11    7.88
  -3   9  -2  -18.62   10.15
   9  -6  -2  -16.12   15.54
   9  -6  -2  -16.40   10.80
  -3   9  -2    0.46   10.83
  -3   9  -2    8.73   12.72
  -9   6   2  -13.12   15.15
   3  -9   2   -0.58    9.06
   6   3   2  -10.32    9.05
   6   3   2  -11.90    9.65
   3  -9   2    2.74    9.51
   6   3   2   -2.34    8.84
   3  -9   2   13.73   12.40
  -9   6   2    8.00   11.91
  -6  -2  -2  411.95   29.20
  -2   8  -2  356.11   27.80
  -6  -2  -2  357.41   28.48
  -2   8  -2  342.23   30.96
   8  -6  -2  315.53   36.21
   8  -6  -2  372.13   31.45
   8  -6  -2  378.86   31.25
  -2   8  -2  311.21   30.26
  -6  -2  -2  358.34   27.97
   2  -8   2  341.79   30.93
   6   2   2  322.04   28.73
   6   2   2  339.22   28.04
   2  -8   2  374.93   27.54
  -8   6   2  332.29   31.75
   6   2   2  392.40   29.03
   2  -8   2  403.00   32.26
  -8   6   2  312.34   30.19
  -8   6   2  356.50   36.05
   7  -6  -2    8.82   10.85
  -1   7  -2    3.67   10.57
  -1   7  -2   -5.32    7.16
   7  -6  -2    5.69   14.94
   7  -6  -2   16.43   11.61
  -6  -1  -2   -7.75    8.10
  -6  -1  -2    6.58    8.94
  -1   7  -2    9.56    9.67
  -6  -1  -2    1.74   10.08
   1  -7   2   -1.30   10.79
  -7   6   2   -8.62   14.91
   6   1   2   17.73   11.38
  -7   6   2  -13.73   15.30
   6   1   2   -7.62    8.16
   6   1   2    3.67    8.67
   1  -7   2   12.69    6.75
  -7   6   2    0.67    8.45
   0   6  -2   63.93   12.45
   0   6  -2   70.65    8.17
  -6   0  -2   63.19   13.80
  -6   0  -2   56.24   11.19
   6  -6  -2   64.56   15.09
   6  -6  -2   46.73   17.82
   6  -6  -2   60.32   15.68
  -6   0  -2   65.62   10.62
   0   6  -2   67.38   11.56
   0  -6   2   54.47   11.85
   6   0   2   80.70   14.63
   6   0   2   78.17   11.52
  -6   6   2   67.69   14.90
  -6   6   2   88.69   15.93
   6   0   2   63.19   10.19
  -6   6   2   84.52   17.73
   5  -6  -2   -0.11   10.40
  -6   1  -2   20.44    9.54
   1   5  -2   18.02    9.37
  -6   1  -2   17.88    8.10
  -6   1  -2    9.08   12.42
   1   5  -2   33.34    4.80
   1   5  -2   48.08   10.12
   5  -6  -2   20.11   10.34
  -5   6   2   13.94   12.71
  -1  -5   2   44.34   10.62
   6  -1   2   15.29   12.27
   6  -1   2   32.42    9.70
  -1  -5   2   25.89    9.51
  -5   6   2   36.01    9.42
   6  -1   2   33.41   10.01
  -5   6   2    8.25    9.92
   4  -6  -2  113.99   15.99
   2   4  -2  131.20   11.21
  -6   2  -2  147.39   15.64
   4  -6  -2  117.37   15.77
  -6   2  -2  152.56   18.55
   2   4  -2  107.41   12.29
   2   4  -2  117.33   12.88
   2   4  -2  123.65   10.68
   6  -2   2  155.61   15.98
  -4   6   2  118.35   15.48
  -2  -4   2  114.76   12.58
  -4   6   2  136.02   16.91
   6  -2   2  131.88   17.84
  -4   6   2  112.84   15.04
   6  -2   2   98.96   14.26
  -2  -4   2  122.77   12.56
   3   3  -2   19.23    7.37
  -6   3  -2  -10.62   13.29
   3  -6  -2    8.01   11.56
   3  -6  -2   12.20    9.74
  -6   3  -2   11.66    9.70
  -6   3  -2   14.99    8.18
   3  -6  -2   16.08   10.93
   3   3  -2   21.85    7.02
   3   3  -2   21.42    6.76
  -3  -3   2   21.70    6.97
   6  -3   2   18.34    9.90
  -3  -3   2   11.97    6.67
  -3   6   2   21.58   11.03
  -3   6   2   17.49   10.52
   6  -3   2    8.50    8.75
  -3   6   2   22.32   10.05
   6  -3   2   29.22   15.12
   4   2  -2  131.39   13.29
  -6   4  -2   97.27   14.42
   2  -6  -2  117.21   15.17
   4   2  -2  142.73   13.48
   2  -6  -2  125.59   15.09
   4   2  -2  126.65   11.72
  -6   4  -2   89.37   12.80
  -6   4  -2  130.59   18.57
   2  -6  -2  142.81   13.61
  -4  -2   2  120.32   12.85
  -4  -2   2  113.66   11.55
  -4  -2   2  133.36   11.97
  -2   6   2   82.78   13.36
   6  -4   2  129.81   15.65
  -2   6   2  135.82   13.37
   6  -4   2  120.15   17.48
   6  -4   2  181.56   18.38
  -2   6   2   94.22   14.63
   5   1  -2    6.77    9.26
   5   1  -2   19.22    6.56
   5   1  -2   19.99    6.95
  -6   5  -2    9.29   12.80
   1  -6  -2   16.90   10.87
   1  -6  -2   18.37    6.49
  -6   5  -2   16.24    7.81
   1  -6  -2   17.95   10.45
  -6   5  -2   11.42   10.90
  -5  -1   2   17.83    7.18
  -1   6   2   13.56    9.51
  -1   6   2   11.04    6.00
  -5  -1   2   24.26    7.01
   6  -5   2   49.27   10.43
  -1   6   2   25.28   10.88
   6  -5   2    4.41   13.65
   6  -5   2   23.31   11.84
  -5  -1   2   14.63    9.60
  -6   6  -2   46.36    9.95
  -6   6  -2   65.75   15.09
   0  -6  -2   99.23   15.31
   6   0  -2   64.32    9.50
   6   0  -2   95.68   15.13
  -6   6  -2   54.77   17.98
   0  -6  -2   57.37   12.28
   6   0  -2   64.72    9.24
  -6   0   2   48.35    8.98
   6  -6   2   46.86   12.94
   6  -6   2   66.27   12.96
  -6   0   2   57.10    9.84
   6  -6   2   95.95   17.80
  -6   0   2   66.51   13.49
   0   6   2   70.84   12.41
   0   6   2   63.66   13.32
   7  -1  -2  -28.05   11.93
  -1  -6  -2    1.67    9.14
   7  -1  -2   -6.12    8.02
  -6   7  -2   12.17   12.13
  -6   7  -2   -8.93   13.57
  -6   7  -2    1.82    9.85
   7  -1  -2    3.43    7.22
   1   6   2   -3.59    9.65
   1   6   2   -2.15    8.67
   6  -7   2   -0.15   12.52
  -7   1   2    0.20    7.97
  -7   1   2    2.68    8.04
   6  -7   2   17.82   15.12
  -7   1   2  -14.03   12.21
   6  -7   2    4.82   12.19
  -6   8  -2  363.67   32.68
   8  -2  -2  330.82   34.71
  -6   8  -2  327.20   31.52
   8  -2  -2  350.31   26.81
  -6   8  -2  341.92   33.87
  -2  -6  -2  374.41   28.78
  -2  -6  -2  376.94   29.17
   8  -2  -2  337.86   27.01
  -8   2   2  349.92   27.11
   6  -8   2  346.70   34.04
  -8   2   2  344.11   33.27
  -8   2   2  272.13   26.00
   2   6   2  324.74   28.63
   2   6   2  310.16   28.67
   6  -8   2  333.72   32.56
   9  -3  -2   18.62   17.33
   9  -3  -2   -5.84    9.24
  -3  -6  -2    3.86    8.45
  -6   9  -2   -2.36   12.26
  -3  -6  -2    1.44    9.53
  -6   9  -2    8.95   14.41
  -6   9  -2    4.21   14.06
   9  -3  -2  -11.34    9.59
   6  -9   2   16.23   15.12
   3   6   2    3.14   10.05
  -9   3   2   -7.12    8.75
   6  -9   2   -6.54   13.73
   6  -9   2   -5.32   14.65
  -9   3   2   -4.18   15.72
  -9   3   2   11.03   10.11
   3   6   2   30.62   12.79
  10  -4  -2   -3.45   17.38
  -6  10  -2    1.26   13.03
  10  -4  -2   14.55   10.48
  -4  -6  -2   -0.39    8.97
  -4  -6  -2    3.01   11.30
  -6  10  -2   13.71   15.72
  -6  10  -2    3.40   14.82
  10  -4  -2   -0.69   10.99
   4   6   2    8.04   10.31
   6 -10   2    9.00   13.04
 -10   4   2   10.44   11.14
   6 -10   2    9.03   15.70
 -10   4   2    6.83   16.47
   6 -10   2  -24.27   13.90
 -10   4   2   -1.74    9.66
   4   6   2   -1.84   10.25
  -5  -6  -2   28.70   11.85
  -6  11  -2   57.91   16.42
  -6  11  -2   61.34   19.49
  -6  11  -2   55.04   17.10
  -5  -6  -2   43.27   12.66
 -11   5   2   18.48   19.11
   6 -11   2   12.29   15.32
 -11   5   2   41.73   13.43
   6 -11   2   66.55   18.75
  -6  12  -2   42.80   19.95
  -6  -6  -2   94.38   20.09
  -6  12  -2  103.43   18.26
 -12   6   2   66.20   17.03
 -12   6   2   54.58   22.69
   6 -12   2   73.42   20.94
  -7  -6  -2   36.64   13.20
 -13   7   2   52.83   23.06
   6 -13   2   52.07   23.32
 -13   7   2   65.48   17.91
  -5  12  -2   38.43   14.58
 -12   7   2    4.80   14.92
   5 -12   2   38.04   16.63
 -12   7   2   54.79   30.08
  -4  11  -2   21.79   17.45
  -4  11  -2   32.15   12.68
  -7  -4  -2   32.08   11.92
  -7  -4  -2   22.02   11.49
 -11   7   2   12.82   14.24
   4 -11   2   46.13   18.84
 -11   7   2   48.23   20.02
  -3  10  -2   20.39   15.55
  -3  10  -2    2.16   10.51
  -7  -3  -2   21.86   10.75
  -7  -3  -2   23.32    9.37
  10  -7  -2  -18.11   18.19
  10  -7  -2   36.87   14.94
  -7  -3  -2   12.34   10.72
  10  -7  -2   22.38   12.62
 -10   7   2    5.87   16.80
 -10   7   2    1.87   13.75
   3 -10   2    8.01   10.51
   7   3   2   19.24   10.52
   3 -10   2   12.46   13.43
   7   3   2   47.26   12.47
   3 -10   2    5.07   12.72
 -10   7   2   19.72   10.04
   7   3   2   22.52   11.51
  -7  -2  -2   -1.75    8.77
  -7  -2  -2   -0.40    9.99
   9  -7  -2    0.23   12.51
  -7  -2  -2   -2.12    8.44
  -2   9  -2   -8.40    8.27
  -2   9  -2    4.80   11.31
  -2   9  -2   -7.54    8.96
   9  -7  -2   16.38   12.40
   7   2   2    3.22    9.94
  -9   7   2   -3.19    9.93
   7   2   2  -13.71   10.28
   2  -9   2   -2.59    8.10
   2  -9   2  -13.25   11.29
  -9   7   2    1.53   15.90
   2  -9   2  -24.94   11.63
  -9   7   2   -5.32   12.13
   7   2   2  -12.59    8.97
   8  -7  -2   32.31   16.56
  -1   8  -2   87.42   14.17
   8  -7  -2  105.56   17.03
   8  -7  -2   66.18   16.10
  -1   8  -2   63.26   13.18
  -7  -1  -2   87.78   12.61
  -7  -1  -2   65.20   14.14
  -7  -1  -2   87.06   12.97
  -1   8  -2   68.90    9.65
   1  -8   2   81.75   16.71
  -8   7   2   93.61   20.33
   1  -8   2   65.32    8.86
   7   1   2   63.04   12.61
  -8   7   2   62.16   12.42
   7   1   2   70.88   12.86
  -8   7   2   89.79   17.44
   7  -7  -2  159.90   20.65
  -7   0  -2  143.32   15.39
   7  -7  -2  110.53   17.74
  -7   0  -2  124.71   14.28
  -7   0  -2  119.44   17.33
   0   7  -2  104.59   14.26
   7  -7  -2   97.58   19.35
   7   0   2  160.47   16.37
   7   0   2  148.83   18.95
   0  -7   2  136.60   17.52
   0  -7   2  126.99   17.54
  -7   7   2  141.94   21.59
   7   0   2  128.71   14.68
  -7   7   2   77.33   13.90
   6  -7  -2    2.82   13.57
  -7   1  -2    5.63    8.65
   6  -7  -2  -11.42   11.87
   1   6  -2   -4.79    8.38
   1   6  -2   -3.71    8.76
  -7   1  -2    1.81   10.20
  -7   1  -2   -7.12   13.05
   7  -1   2   28.08   13.87
   7  -1   2    8.49    8.80
  -6   7   2   -5.72   14.09
  -1  -6   2   -3.40    9.81
   7  -1   2   12.47    8.39
  -1  -6   2  -15.98    9.58
  -6   7   2   -4.70    9.96
  -6   7   2   -7.97   13.73
   2   5  -2  197.94   20.41
  -7   2  -2  205.33   22.04
   5  -7  -2  204.47   21.84
   5  -7  -2  222.24   23.46
  -7   2  -2  208.52   21.19
  -7   2  -2  237.44   24.59
   2   5  -2  250.26   20.71
  -5   7   2  221.34   23.05
   7  -2   2  238.85   24.54
   7  -2   2  233.30   21.99
  -5   7   2  239.48   25.80
  -2  -5   2  206.44   20.15
   7  -2   2  252.09   21.99
  -5   7   2  247.04   24.24
  -2  -5   2  216.71   20.89
   3   4  -2   53.71   10.29
   3   4  -2   62.18    7.60
   4  -7  -2   44.81    9.71
   4  -7  -2   58.35   12.97
   3   4  -2   69.52   10.39
   4  -7  -2   63.10   13.90
  -7   3  -2   60.11   15.20
   3   4  -2   77.59    8.33
  -4   7   2   47.99   13.40
  -4   7   2   63.85   13.46
   7  -3   2   74.00   12.98
  -3  -4   2   88.25   10.87
  -4   7   2   72.63   11.75
   7  -3   2   49.15   10.25
  -3  -4   2   51.36    9.98
   7  -3   2  102.09   18.04
   3  -7  -2   40.60   11.51
   4   3  -2   80.93    9.73
   3  -7  -2   44.28   10.80
  -7   4  -2   69.98   12.70
  -7   4  -2   54.48   16.08
   3  -7  -2   53.10   11.84
  -7   4  -2   72.88   13.70
   4   3  -2   49.33    9.52
   4   3  -2   63.84    9.14
   7  -4   2   45.56   12.14
   7  -4   2   84.10   17.75
  -4  -3   2   68.24    9.93
  -3   7   2   68.84   13.35
  -3   7   2   49.95   11.61
   7  -4   2   55.58   10.21
  -3   7   2   55.45   11.76
  -4  -3   2   63.53    9.48
  -7   5  -2  261.49   24.98
   5   2  -2  215.84   18.88
   2  -7  -2  219.43   20.44
  -7   5  -2  254.20   24.39
   2  -7  -2  214.29   22.34
   5   2  -2  230.26   18.76
   2  -7  -2  268.16   25.34
  -7   5  -2  284.88   27.18
   5   2  -2  213.42   21.52
  -5  -2   2  230.88   18.98
   7  -5   2  211.46   22.90
  -2   7   2  222.43   19.98
  -2   7   2  264.17   24.39
  -5  -2   2  223.53   20.90
   7  -5   2  183.94   20.96
  -5  -2   2  231.79   18.85
   7  -5   2  258.43   26.14
  -2   7   2  174.87   20.13
  -7   6  -2   -0.02    9.85
   1  -7  -2   13.02   10.47
   1  -7  -2    6.81    5.78
   6   1  -2    4.29   10.89
   1  -7  -2   15.62   22.00
   6   1  -2    0.87    7.14
  -7   6  -2    0.53   10.29
  -7   6  -2  -17.75   14.38
   6   1  -2   -9.73    7.10
  -1   7   2   -0.74    5.27
   7  -6   2    8.47   11.79
  -6  -1   2    3.79    7.19
   7  -6   2   32.66   16.40
   7  -6   2   -7.48   12.47
  -1   7   2   16.07    9.90
  -6  -1   2   15.52    7.22
  -6  -1   2   -2.72   10.66
  -7   7  -2  116.29   18.33
   7   0  -2  103.88   12.69
   0  -7  -2  178.33   20.14
   0  -7  -2  152.14   19.49
   7   0  -2  158.08   19.87
  -7   7  -2  100.22   16.94
   7   0  -2  135.36   13.54
  -7   7  -2   91.93   19.84
  -7   0   2  134.46   13.78
  -7   0   2  108.68   17.72
   7  -7   2  122.77   21.91
   7  -7   2  167.69   21.11
   0   7   2  166.87   18.45
   7  -7   2  138.25   19.85
  -7   0   2  125.85   13.26
   0   7   2  138.83   17.07
   8  -1  -2   65.89   11.42
  -7   8  -2   72.13   18.56
   8  -1  -2   36.86   16.52
   8  -1  -2   77.38   10.94
  -7   8  -2   68.62   18.43
  -1  -7  -2   70.92   14.83
  -7   8  -2   62.02   15.12
   1   7   2   48.08   12.09
   7  -8   2   66.91   18.07
  -8   1   2   61.99   11.49
   7  -8   2   73.77   17.43
   7  -8   2   47.15   12.68
  -8   1   2   77.51   11.27
  -8   1   2   75.70   16.78
  -2  -7  -2    0.77    9.83
   9  -2  -2   -7.27    9.19
   9  -2  -2   -3.85    8.91
  -7   9  -2   -2.79   15.83
   9  -2  -2  -33.80   13.88
  -7   9  -2   -4.35   10.39
  -7   9  -2    9.17   13.63
  -2  -7  -2  -12.13   10.08
  -9   2   2   -6.88    9.11
   7  -9   2  -23.77   13.19
   2   7   2   -4.30   10.95
   7  -9   2    4.02   14.96
  -9   2   2   -5.98   14.94
  -9   2   2    9.97    9.75
   7  -9   2   -8.65   15.17
   2   7   2    5.74    9.90
  10  -3  -2   23.04   10.63
  -7  10  -2   20.88   16.35
  -7  10  -2   22.62   16.64
  10  -3  -2  -10.61   16.34
  -3  -7  -2   17.45   11.84
  -7  10  -2   23.79   16.84
  -3  -7  -2   16.88   12.84
  10  -3  -2   33.17   10.85
 -10   3   2   -2.08   10.52
   7 -10   2   14.65   16.32
 -10   3   2   13.88   10.75
 -10   3   2   41.27   17.86
   7 -10   2    2.36   16.85
   7 -10   2   29.29   16.80
   3   7   2   31.62   13.46
   3   7   2   38.29   12.75
  -7  11  -2   16.73   13.91
  -7  11  -2   41.00   17.48
  -7  11  -2   16.70   16.24
  -4  -7  -2   32.67   12.58
 -11   4   2   24.95   11.45
 -11   4   2   28.18   18.53
 -11   4   2   41.40   12.96
   7 -11   2    1.23   16.74
   7 -11   2   47.26   17.84
  -7  12  -2   42.14   17.21
   7 -12   2   46.43   19.66
 -12   5   2    9.53   19.22
 -12   5   2   32.07   18.43
  -7  13  -2   33.81   16.96
  -6  -7  -2   29.87   13.93
   7 -13   2   -3.99   21.14
 -13   6   2   53.31   20.88
 -13   6   2   26.66   15.19
  -7  -7  -2   52.66   15.36
 -14   7   2   30.28   16.47
   7 -14   2   24.30   20.08
 -14   7   2   81.57   24.38
  -8  -7  -2    2.81   13.20
 -15   8   2   18.05   17.54
 -15   8   2   -1.92   20.76
   7 -15   2  -37.88   17.71
  -8  -6  -2   28.89   13.29
 -14   8   2   26.07   21.86
   6 -14   2    6.19   17.65
 -14   8   2   10.81   16.49
  -8  -5  -2   40.28   12.87
 -13   8   2   27.33   17.51
 -13   8   2   47.63   23.08
   5 -13   2   11.90   24.65
  -8  -4  -2    8.59   11.31
   4 -12   2   -2.13   15.39
 -12   8   2    2.08   15.80
 -12   8   2   48.48   23.21
  -8  -3  -2  193.10   21.26
  -3  11  -2  278.01   27.24
  -8  -3  -2  227.71   22.82
  -8  -3  -2  220.91   22.30
 -11   8   2  269.22   28.97
   3 -11   2  200.72   24.86
 -11   8   2  242.86   30.95
  -2  10  -2   45.48    9.52
  -2  10  -2   68.14   16.29
  -8  -2  -2   30.22   11.37
  -8  -2  -2   46.03   12.82
  -2  10  -2   39.97   12.24
  -8  -2  -2   55.57   12.50
  10  -8  -2   26.37   13.68
  10  -8  -2   51.27   16.27
   8   2   2   28.94   13.53
   2 -10   2   71.79   18.01
 -10   8   2   30.23   19.34
 -10   8   2   28.39   16.32
  -8  -1  -2    0.09    8.66
   9  -8  -2  -39.97   18.09
   9  -8  -2   -7.97   14.93
   9  -8  -2   -5.42   12.66
  -1   9  -2    5.73   13.67
  -1   9  -2  -10.71   10.72
  -8  -1  -2   -4.07    9.72
  -9   8   2   16.43   16.95
   8   1   2    4.13   10.36
   8   1   2  -14.43   12.42
   8   1   2    9.85    9.95
  -9   8   2   -3.76    9.18
  -9   8   2    1.19   14.72
   1  -9   2    0.89   11.92
  -8   0  -2  100.38   17.04
   8  -8  -2   75.43   20.67
  -8   0  -2   82.34   13.30
  -8   0  -2  106.83   14.50
   0   8  -2   95.39   15.10
   8  -8  -2  106.63   17.62
   0   8  -2   88.93   15.69
   8  -8  -2   82.31   17.99
   8   0   2   71.36   12.69
   0  -8   2   64.08   13.10
   8   0   2   67.16   17.23
  -8   8   2   78.20   19.91
   0  -8   2   92.43   14.96
  -8   8   2   99.93   17.74
   8   0   2   87.13   14.76
  -8   8   2   80.07   17.79
  -8   1  -2   65.67   17.23
  -8   1  -2   88.39   14.26
   7  -8  -2   47.92   13.72
   7  -8  -2   64.01   18.84
  -8   1  -2   69.80   13.65
   1   7  -2  106.99   13.83
   1   7  -2   93.84   14.01
   7  -8  -2   64.21   17.48
  -7   8   2   70.75   15.16
  -1  -7   2   89.63   15.40
  -1  -7   2   64.15   13.03
   8  -1   2   98.25   13.78
   8  -1   2   77.32   13.07
   8  -1   2   92.16   18.73
  -7   8   2   44.18   18.69
  -7   8   2   54.57   17.28
   2   6  -2  327.67   27.93
  -8   2  -2  362.86   28.95
   6  -8  -2  390.29   35.40
  -8   2  -2  396.36   34.33
   6  -8  -2  381.83   35.98
  -8   2  -2  357.13   29.72
   6  -8  -2  332.92   32.90
   2   6  -2  330.83   28.25
  -6   8   2  359.19   34.57
   8  -2   2  353.97   29.41
   8  -2   2  337.75   34.69
   8  -2   2  344.74   29.06
  -2  -6   2  356.31   28.14
  -2  -6   2  358.42   28.94
  -6   8   2  326.89   31.23
  -6   8   2  364.52   32.98
   5  -8  -2   23.86   13.36
  -8   3  -2    3.09   10.61
  -8   3  -2   27.95   15.75
  -8   3  -2   27.89   10.50
   5  -8  -2    8.28    8.57
   5  -8  -2   27.15   14.06
   3   5  -2   14.77    8.90
   3   5  -2   23.16    9.84
  -3  -5   2   28.10    9.48
  -5   8   2   15.74   13.02
   8  -3   2   34.09   11.18
  -5   8   2   27.12   11.09
   8  -3   2   -0.03   15.10
   8  -3   2   24.48   11.53
  -3  -5   2   32.86    8.93
  -5   8   2   24.90   13.31
   4   4  -2    7.45    8.06
  -8   4  -2    7.48   15.06
   4   4  -2    9.64    8.46
  -8   4  -2    2.06    7.76
   4  -8  -2    9.17   11.66
  -8   4  -2    4.17   11.65
   4  -8  -2   20.01   14.49
   4   4  -2    8.57    6.95
   4  -8  -2  -15.40    8.58
   4   4  -2    2.60    6.20
  -4   8   2   -3.43   11.25
  -4  -4   2    2.30    7.54
   8  -4   2    4.32   15.69
  -4   8   2   -0.53   10.92
  -4   8   2   11.52   12.38
  -4  -4   2    1.95    8.06
   8  -4   2   23.20   11.33
   8  -4   2    6.53   10.20
   5   3  -2   15.73    8.27
   5   3  -2   27.03    8.54
   5   3  -2    8.18    9.16
  -8   5  -2   17.70   11.88
   3  -8  -2   -1.35   10.07
  -8   5  -2   43.78   12.61
  -8   5  -2    2.17   16.09
   3  -8  -2   40.33   14.24
   3  -8  -2   15.04   12.75
   8  -5   2   19.53   11.96
   8  -5   2   35.43   17.43
  -5  -3   2   27.00    8.41
   8  -5   2   22.64   13.02
  -3   8   2   15.63    9.66
  -5  -3   2   21.16    8.27
  -3   8   2   37.90   13.69
  -3   8   2   30.50   12.76
   6   2  -2  346.04   29.13
  -8   6  -2  352.30   31.52
   2  -8  -2  357.66   26.44
   6   2  -2  366.07   26.14
  -8   6  -2  351.75   31.85
   2  -8  -2  377.60   32.95
   2  -8  -2  344.08   31.32
  -8   6  -2  370.10   36.36
   6   2  -2  331.40   25.87
   8  -6   2  379.25   36.26
  -6  -2   2  412.55   28.99
  -6  -2   2  324.68   25.71
  -2   8   2  360.43   25.86
   8  -6   2  292.47   31.30
  -6  -2   2  329.76   25.74
  -2   8   2  366.34   31.77
  -2   8   2  309.00   30.90
   8  -6   2  348.76   31.31
   7   1  -2   79.19   10.79
   1  -8  -2   66.04   15.22
   7   1  -2   75.34   10.66
  -8   7  -2   84.28   19.72
   1  -8  -2   80.30   15.22
  -8   7  -2   57.49   16.35
   7   1  -2   60.00   15.22
  -8   7  -2   50.91   15.84
   8  -7   2   42.80   18.30
  -7  -1   2   61.76   10.31
  -1   8   2  105.20   17.78
   8  -7   2   57.45   14.75
   8  -7   2   46.57   14.85
  -1   8   2   77.17   16.48
  -7  -1   2   71.91   14.94
  -7  -1   2   93.03   11.06
  -8   8  -2   45.37   12.76
  -8   8  -2   58.74   19.69
   8   0  -2   85.39   11.77
   0  -8  -2   68.82   14.77
   8   0  -2   94.35   12.23
   0  -8  -2  118.39   17.89
   8   0  -2   64.34   17.03
  -8   8  -2   85.19   18.44
   0   8   2   85.25   14.56
  -8   0   2   86.44   11.42
  -8   0   2   79.39   12.33
   8  -8   2   52.47   20.42
   8  -8   2  109.98   20.87
  -8   0   2   82.16   16.68
   0   8   2   86.64   15.28
   8  -8   2   92.35   17.29
  -1  -8  -2  -25.21    9.72
  -8   9  -2  -27.15   15.74
   9  -1  -2   -9.92   14.86
   9  -1  -2  -14.90    8.76
   9  -1  -2    3.74    7.91
  -8   9  -2  -19.59   13.43
  -8   9  -2   -6.98   17.55
  -9   1   2    1.64    8.45
  -9   1   2   11.56   14.37
   8  -9   2   -0.45   15.26
   1   8   2   -7.63   12.93
   1   8   2   13.34   10.84
   8  -9   2  -17.91   12.79
   8  -9   2  -34.88   15.92
  -9   1   2   12.20    9.51
  10  -2  -2   22.96   21.02
  -8  10  -2   42.98   12.43
  -2  -8  -2   19.35   11.08
  -8  10  -2    8.93   13.82
  -2  -8  -2   50.21   14.48
  -8  10  -2   34.82   18.33
 -10   2   2   43.95   11.61
 -10   2   2   55.79   18.09
 -10   2   2   25.18   10.43
   8 -10   2   20.05   13.70
   2   8   2   43.74   16.02
   8 -10   2    7.78   17.89
  -8  11  -2  182.47   27.05
  -8  11  -2  240.35   28.41
  -3  -8  -2  188.85   22.82
   8 -11   2  165.03   27.83
 -11   3   2  249.00   24.47
 -11   3   2  249.75   22.81
   8 -11   2  187.30   25.91
 -11   3   2  178.04   26.88
  -8  12  -2   -5.28   16.87
  -4  -8  -2   12.15   13.49
  -8  12  -2   -3.41   14.57
 -12   4   2    1.96   11.94
   8 -12   2   -7.39   17.71
 -12   4   2   24.84   17.78
  -8  13  -2   29.04   17.61
  -5  -8  -2   17.74   13.34
 -13   5   2   -9.12   12.55
 -13   5   2   15.29   18.36
   8 -13   2  -19.52   17.16
  -6  -8  -2   41.46   15.63
 -14   6   2   49.31   22.52
 -14   6   2    9.04   14.35
   8 -14   2   34.55   29.20
  -7  -8  -2   10.44   14.13
 -15   7   2   19.81   21.80
 -15   7   2  -15.40   15.77
  -9  -6  -2  -18.65   12.27
 -15   9   2   48.03   25.34
   6 -15   2  -11.48   22.68
 -15   9   2   -1.20   18.21
  -9  -5  -2  136.44   19.47
 -14   9   2  171.77   32.03
 -14   9   2  131.50   25.58
   5 -14   2  109.46   23.65
  -9  -4  -2   31.06   12.87
   4 -13   2   17.79   18.28
 -13   9   2   19.50   18.49
 -13   9   2   29.37   22.05
  -9  -3  -2   83.37   15.06
 -12   9   2   71.31   23.57
 -12   9   2   83.61   22.45
   3 -12   2  132.70   25.13
  -9  -2  -2   22.79   12.70
  -9  -2  -2   41.50   12.34
 -11   9   2   34.25   19.67
 -11   9   2   37.81   20.17
   2 -11   2   25.28   16.00
  10  -9  -2  107.04   25.89
  10  -9  -2   45.93   16.75
  -9  -1  -2   95.56   14.32
  -9  -1  -2  106.18   17.62
  -9  -1  -2   72.03   14.04
   1 -10   2   75.23   17.40
 -10   9   2   78.50   19.88
   9   1   2   61.53   18.79
 -10   9   2   77.53   21.82
  -9   0  -2  165.46   21.59
   0   9  -2  159.85   21.15
   9  -9  -2  177.97   24.17
   9  -9  -2   86.93   18.78
  -9   0  -2  147.98   17.70
   0   9  -2  121.74   21.81
   9  -9  -2   94.52   24.18
  -9   0  -2  146.30   17.93
   9   0   2  153.71   20.40
   0  -9   2  148.42   18.80
  -9   9   2  142.83   23.00
   0  -9   2  118.01   17.62
   9   0   2  150.08   22.35
  -9   9   2  183.50   25.95
   9   0   2  183.35   24.92
  -9   9   2  131.95   21.92
   8  -9  -2   -3.68   17.55
   8  -9  -2   -1.37   12.25
  -9   1  -2   13.99   10.92
   8  -9  -2   25.76   16.15
   1   8  -2   10.13   10.47
  -9   1  -2   10.14   13.97
   1   8  -2   -1.06   10.84
  -9   1  -2   12.78    9.73
  -8   9   2  -12.18   11.61
   9  -1   2   -3.34    8.48
   9  -1   2  -13.40   15.78
  -1  -8   2   12.07   11.99
  -8   9   2    8.58   16.10
  -1  -8   2   12.84   11.96
   9  -1   2  -15.65    9.59
  -8   9   2   11.30   15.70
  -9   2  -2   14.46   11.57
  -9   2  -2    5.44    9.69
   7  -9  -2   12.49   13.97
   2   7  -2   -4.70   10.50
   7  -9  -2   -3.42   15.86
  -9   2  -2    9.55   15.06
   2   7  -2  -11.16    9.12
   7  -9  -2    3.12   12.29
  -2  -7   2    7.17    9.56
  -2  -7   2  -15.63    9.47
  -7   9   2  -12.27   14.38
  -7   9   2  -22.38   13.40
  -7   9   2    1.17   13.81
   9  -2   2  -36.87   15.14
   9  -2   2  -11.16    9.90
  -9   3  -2   11.35   11.64
   3   6  -2   -3.29    9.57
   3   6  -2  -10.79    9.34
   6  -9  -2    0.00   12.83
  -9   3  -2    4.19    9.29
   6  -9  -2    1.80   10.84
  -9   3  -2   -3.66   14.38
   6  -9  -2   -2.79   13.71
  -3  -6   2    5.08    8.62
  -6   9   2   -8.33   13.09
  -6   9   2  -12.56   12.45
   9  -3   2    7.80   11.37
  -3  -6   2   -9.23    9.30
   9  -3   2  -11.18    9.81
   9  -3   2   -1.07   16.05
  -6   9   2   30.29   15.16
   4   5  -2    3.86    8.26
  -9   4  -2    3.25   11.79
  -9   4  -2    6.15   15.98
   5  -9  -2  -24.15   12.71
   5  -9  -2   -3.84   11.39
   4   5  -2   -6.13    7.72
   5  -9  -2   25.77   15.19
  -4  -5   2   10.19    8.82
   9  -4   2  -32.74   15.77
  -5   9   2    7.39   12.36
  -5   9   2    5.71   14.14
  -5   9   2    2.29   13.96
  -4  -5   2   -9.50    8.08
   9  -4   2    5.54   10.77
   9  -4   2    4.29    9.74
  -9   5  -2   12.02   11.80
  -9   5  -2    7.30   16.76
   4  -9  -2    0.98   11.31
   4  -9  -2    2.99    8.98
   5   4  -2    2.80    8.87
   5   4  -2  -11.17    7.40
  -9   5  -2    2.40    9.89
   5   4  -2  -12.35    7.85
   4  -9  -2   10.43   15.26
   9  -5   2  -21.17   11.45
  -4   9   2   15.44   11.40
  -4   9   2   16.38   13.60
  -5  -4   2   -0.78    7.37
   9  -5   2    1.11   10.84
   9  -5   2  -32.00   16.05
  -5  -4   2    8.49    8.57
  -4   9   2    8.91    9.88
   3  -9  -2  -13.31    9.03
  -9   6  -2   -3.43   11.96
   6   3  -2  -17.13    8.83
   6   3  -2    6.43    8.04
   3  -9  -2    3.55   12.97
  -9   6  -2   -0.18   10.82
   3  -9  -2   -8.08   12.82
   6   3  -2    3.16    7.88
  -9   6  -2   -5.56   16.11
  -3   9   2   13.79   13.28
  -6  -3   2   -0.12    8.17
  -3   9   2   -1.80   13.33
   9  -6   2    1.82   11.82
  -3   9   2    1.09    9.27
  -6  -3   2    8.93    7.84
   9  -6   2  -40.94   15.61
   9  -6   2   -3.42   12.26
   2  -9  -2   -4.41   12.80
  -9   7  -2   -3.17   12.95
  -9   7  -2  -22.51   16.93
   2  -9  -2  -14.13   11.74
   2  -9  -2   -5.87    7.17
   7   2  -2    0.72   12.90
   7   2  -2    1.88    8.08
  -9   7  -2    1.33   13.37
  -2   9   2    2.58    6.66
   9  -7   2  -14.20    8.88
  -2   9   2    9.98   11.48
  -7  -2   2   18.53    8.57
   9  -7   2  -16.91   12.13
  -7  -2   2   11.00    8.34
   9  -7   2  -33.34   29.95
  -7  -2   2   -3.68   10.14
  -9   8  -2   -9.75   17.55
   1  -9  -2    6.03   10.61
   8   1  -2   -9.80   13.68
   1  -9  -2  -27.15   12.06
   8   1  -2    2.23    7.83
  -9   8  -2    4.39   13.58
  -9   8  -2   15.87   13.42
   8   1  -2  -22.72   11.99
   9  -8   2  -36.91   16.06
  -8  -1   2    0.33    7.45
  -1   9   2    1.93   11.97
   9  -8   2  -21.90   12.62
   9  -8   2   10.16   14.12
  -8  -1   2   -5.34   11.37
  -1   9   2  -12.22   12.06
  -8  -1   2    7.89    8.77
  -9   9  -2  181.56   26.81
   9   0  -2  141.27   15.44
   9   0  -2  150.50   21.77
  -9   9  -2   89.82   16.19
   0  -9  -2  153.09   20.52
   9   0  -2  167.30   22.95
  -9   9  -2  152.50   25.11
   0  -9  -2  121.77   19.05
   9  -9   2  121.96   22.15
   9  -9   2   68.71   23.55
  -9   0   2  149.22   15.32
  -9   0   2  119.67   20.21
  -9   0   2  135.14   14.62
   0   9   2  110.05   18.38
   9  -9   2  142.65   23.76
   0   9   2  100.10   17.09
  -1  -9  -2  112.46   17.92
  -9  10  -2   69.67   20.96
  -9  10  -2  124.54   24.65
   9 -10   2  125.85   24.07
 -10   1   2   71.53   12.10
 -10   1   2   74.28   18.78
 -10   1   2   64.44   12.53
   9 -10   2   56.21   24.46
   9 -10   2   77.24   20.04
  -2  -9  -2   14.76   12.46
  -9  11  -2   -5.66   21.80
  -9  11  -2   21.61   18.69
 -11   2   2   39.39   17.64
 -11   2   2   19.79   11.77
 -11   2   2   18.30   10.99
   9 -11   2   12.42   17.37
  -9  12  -2   83.94   21.60
  -3  -9  -2   71.31   15.77
  -9  12  -2   71.75   17.86
   9 -12   2   53.36   21.49
 -12   3   2   88.21   15.72
 -12   3   2   76.53   21.38
  -9  13  -2   49.84   19.43
  -4  -9  -2   29.52   15.51
 -13   4   2   19.12   13.47
 -13   4   2   42.69   21.01
  -5  -9  -2  147.60   22.41
 -14   5   2  137.33   20.78
 -14   5   2  135.40   27.62
  -6  -9  -2   11.01   15.96
 -15   6   2   36.59   22.77
 -15   6   2   -7.27   15.59
   5 -15   2   61.35   25.22
 -15  10   2   56.48   22.55
 -10  -4  -2   10.52   13.01
   4 -14   2  -13.87   16.47
 -14  10   2  -13.47   19.34
 -14  10   2   16.25   23.27
 -10  -3  -2  -10.50   11.03
   3 -13   2  -13.06   16.68
 -13  10   2   -0.28   16.46
 -13  10   2   23.99   24.12
 -10  -2  -2   48.40   13.38
 -12  10   2   27.69   23.85
   2 -12   2   12.94   15.40
 -12  10   2   71.10   24.12
 -10  -1  -2   23.05   13.50
 -10  -1  -2    0.55   13.49
 -11  10   2  -10.76   17.90
   1 -11   2   14.33   16.48
 -11  10   2   -2.39   18.58
  10 -10  -2   73.57   19.44
 -10   0  -2   82.11   18.21
 -10   0  -2   87.01   14.81
   0 -10   2   69.25   16.45
 -10  10   2   89.24   21.51
 -10  10   2   85.44   23.27
 -10   1  -2   76.11   15.29
   9 -10  -2   36.41   22.76
 -10   1  -2  108.55   19.96
   9 -10  -2  112.15   20.14
 -10   1  -2   96.79   15.06
   9 -10  -2   86.36   19.86
  -1  -9   2  108.91   17.97
  -9  10   2   90.98   18.20
  -9  10   2   54.80   20.22
  10  -1   2   70.61   21.54
   8 -10  -2   -7.80   20.26
 -10   2  -2   47.41   12.30
 -10   2  -2   52.25   17.29
   8 -10  -2   36.55   14.24
   8 -10  -2   12.52   17.24
 -10   2  -2   31.40   12.37
  -2  -8   2   81.51   15.13
  -8  10   2   28.90   17.53
  -2  -8   2   27.98   11.62
  -8  10   2   24.48   18.22
   7 -10  -2   12.61   15.68
 -10   3  -2   12.57   11.13
 -10   3  -2   25.64   17.00
   7 -10  -2   -2.36   17.55
   7 -10  -2   37.79   11.04
 -10   3  -2   18.67   12.19
   3   7  -2    8.52   10.40
   3   7  -2   22.03   11.22
  -7  10   2   13.32   15.30
  -3  -7   2   30.22   12.03
  10  -3   2   12.13   11.32
  -7  10   2  -13.12   17.46
  10  -3   2  -12.74   18.70
  -7  10   2    4.08   13.65
  10  -3   2   25.40   13.24
  -3  -7   2    6.04    9.70
 -10   4  -2  -13.33   15.88
   6 -10  -2  -13.14   14.26
   4   6  -2   -9.92    9.73
   6 -10  -2    2.70   13.79
   4   6  -2    0.30    9.32
 -10   4  -2   -6.66    9.00
   6 -10  -2   13.77   12.32
 -10   4  -2   22.21   14.24
  10  -4   2  -60.48   16.32
  -4  -6   2   -0.52    9.45
  10  -4   2   20.06   13.09
  -6  10   2    8.27   13.26
  -4  -6   2   -2.25    9.29
  -6  10   2  -21.27   11.94
  -6  10   2   -6.41   16.44
  10  -4   2  -15.06   11.15
   5 -10  -2  194.15   23.23
 -10   5  -2  180.80   27.32
   5   5  -2  211.77   20.90
   5   5  -2  199.11   20.64
   5 -10  -2  160.90   21.57
   5 -10  -2  191.93   25.17
 -10   5  -2  198.95   22.57
  10  -5   2  162.64   27.79
  -5  -5   2  214.57   20.10
  -5  10   2  214.29   26.97
  10  -5   2  244.78   23.89
  10  -5   2  239.97   26.22
  -5  10   2  206.56   25.28
  -5  -5   2  170.49   18.88
 -10   6  -2  -12.17   11.92
   4 -10  -2   -8.65   10.49
 -10   6  -2  -26.74   12.07
   6   4  -2  -11.70    8.78
 -10   6  -2  -33.36   15.39
   6   4  -2  -19.88    8.93
   4 -10  -2   -9.98   13.20
   4 -10  -2  -21.66   11.70
  -4  10   2   15.50   10.94
  10  -6   2  -36.02   18.00
  -6  -4   2   -1.04    7.97
  -4  10   2   -6.76   11.53
  -4  10   2   -3.45   14.94
  10  -6   2    0.98   13.58
  -6  -4   2   -2.53    8.14
  10  -6   2    6.17   11.82
 -10   7  -2   23.24   15.17
   7   3  -2   34.66    9.95
 -10   7  -2   28.29   14.82
   7   3  -2    7.64    8.82
   3 -10  -2    9.96   16.30
 -10   7  -2   -5.79   17.51
   3 -10  -2    0.36   14.11
   7   3  -2  -12.39   11.75
   3 -10  -2    6.46    9.83
  -3  10   2   16.85    9.44
  10  -7   2  -14.29   20.00
  -3  10   2   13.07   14.39
  -7  -3   2   17.50    9.44
  -3  10   2   22.68   13.26
  -7  -3   2   28.89    8.88
  10  -7   2   19.39   13.89
   2 -10  -2   54.78   17.60
   8   2  -2   33.73    9.57
   8   2  -2   25.67   15.33
 -10   8  -2   58.66   17.62
 -10   8  -2   52.00   20.10
  -8  -2   2   48.44   10.47
  -2  10   2   36.20   17.07
  10  -8   2   67.91   27.67
  -8  -2   2   40.19   10.34
  10  -8   2   65.55   17.11
  -2  10   2   37.29   16.17
   9   1  -2   39.93   18.86
 -10   9  -2  106.31   20.65
   1 -10  -2  115.76   19.87
 -10   9  -2   71.85   21.62
  -9  -1   2  116.90   18.40
  10  -9   2   81.92   19.19
  -9  -1   2   79.42   12.90
  -1  10   2   61.50   15.23
   0 -10  -2  136.12   22.24
 -10  10  -2  101.81   22.85
 -10  10  -2  133.71   26.04
  10   0  -2   42.94   32.25
  10 -10   2  103.15   22.84
 -10   0   2   54.11   18.08
 -10   0   2   80.68   13.18
 -10   0   2   61.29   13.11
  10 -10   2  102.55   24.47
  -1 -10  -2    1.58   13.14
 -10  11  -2  -10.67   17.56
 -10  11  -2    0.17   16.54
 -11   1   2   -7.34   14.96
 -11   1   2    6.25    9.65
  -2 -10  -2   41.78   14.50
 -10  12  -2   31.32   23.48
 -10  12  -2   11.86   16.00
 -12   2   2   41.26   18.98
 -12   2   2   27.99   12.35
  -3 -10  -2    3.68   14.21
 -10  13  -2   -1.96   17.20
 -13   3   2   12.83   18.15
 -13   3   2    2.22   11.57
  -4 -10  -2    6.74   15.04
 -10  14  -2   33.70   20.34
 -14   4   2   30.56   14.38
 -14   4   2   31.82   20.67
  -5 -10  -2   68.15   28.01
 -15   5   2   38.11   22.60
 -11  -4  -2   17.07   13.07
 -15  11   2   -6.51   26.26
   4 -15   2    2.24   22.06
 -15  11   2   68.87   30.92
 -11  -3  -2  -17.02   11.73
   3 -14   2    2.71   16.58
 -14  11   2   37.39   25.97
 -14  11   2  -22.33   17.05
 -11  -2  -2   -6.02   11.89
   2 -13   2   20.24   16.81
 -13  11   2    8.71   18.73
 -13  11   2   50.48   26.16
 -11  -1  -2   77.89   15.65
 -12  11   2   82.10   29.18
 -12  11   2   62.21   26.50
   1 -12   2   91.09   20.35
 -11   0  -2   22.29   15.20
 -11   0  -2   33.76   13.19
 -11  11   2   44.79   20.02
   0 -11   2    4.38   14.02
 -11  11   2   50.05   23.58
 -11   1  -2   16.80   16.10
 -11   1  -2   10.81   14.25
 -10  11   2   20.88   18.47
 -10  11   2   -8.57   14.53
 -11   2  -2   43.11   18.76
   9 -11  -2   36.11   19.60
 -11   2  -2   22.00   13.20
  11  -2   2  -41.34   19.22
  -9  11   2   51.98   18.48
  -9  11   2    2.70   19.63
  -2  -9   2   17.41   12.11
   8 -11  -2  153.69   28.08
 -11   3  -2  192.18   26.41
 -11   3  -2  206.40   22.38
   8 -11  -2  199.12   27.90
  -3  -8   2  181.63   21.63
  -3  -8   2  184.02   20.35
  -8  11   2  325.40   35.07
  -8  11   2  203.87   26.42
   7 -11  -2   29.14   14.54
   7 -11  -2   -8.09   17.26
 -11   4  -2   23.30   13.47
 -11   4  -2   33.09   18.56
  -7  11   2   14.48   19.02
  -4  -7   2   30.31   11.23
  -7  11   2   30.72   16.77
  -4  -7   2   -3.46   11.15
 -11   5  -2   36.79   19.57
 -11   5  -2   39.61   14.76
   6 -11  -2   36.00   16.50
   6 -11  -2   38.49   16.16
  -6  11   2   46.77   15.57
  -5  -6   2   57.46   13.12
  -5  -6   2   57.65   11.78
  -6  11   2   31.31   15.47
  -6  11   2   46.56   18.49
 -11   6  -2   41.91   15.28
 -11   6  -2  107.10   23.32
   5 -11  -2   51.10   18.40
  -5  11   2   54.00   18.74
  -5  11   2   64.40   14.97
  -6  -5   2   71.65   12.35
  -5  11   2   33.31   14.27
  -6  -5   2   72.92   12.89
 -11   7  -2   58.68   20.25
   4 -11  -2   56.57   19.42
 -11   7  -2   -5.44   14.05
  -7  -4   2   26.44    9.67
  -4  11   2   14.41   12.58
  -4  11   2   40.79   11.77
  11  -7   2   25.61   20.75
  -4  11   2   26.76   16.43
 -11   8  -2  229.02   27.81
 -11   8  -2  253.76   31.39
   3 -11  -2  251.10   30.92
  -3  11   2  188.86   25.79
  -8  -3   2  312.30   24.43
  -8  -3   2  228.55   21.53
  11  -8   2  180.32   25.85
 -11   9  -2    5.07   17.13
   2 -11  -2   11.04   15.36
 -11   9  -2   36.95   20.36
  -9  -2   2   21.92    9.71
  11  -9   2   54.28   29.66
   1 -11  -2   -1.40   14.99
 -11  10  -2   19.09   22.74
 -11  10  -2   -0.97   18.18
 -10  -1   2    3.18   13.63
 -10  -1   2    7.97    9.04
 -10  -1   2    3.18   11.09
 -11  11  -2   56.18   22.11
   0 -11  -2   13.86   14.92
 -11  11  -2   32.21   19.57
 -11   0   2   48.42   17.56
 -11   0   2   17.68   10.40
 -11  12  -2   56.56   22.45
  -1 -11  -2   32.13   15.92
 -11  12  -2   57.34   19.05
 -12   1   2   67.88   13.77
 -12   1   2   45.28   19.56
  -2 -11  -2    9.30   15.12
 -11  13  -2   40.42   20.44
 -13   2   2   17.80   12.07
 -13   2   2    9.67   18.60
  -3 -11  -2   -6.67   14.36
 -11  14  -2   50.14   22.07
 -14   3   2   -6.85   11.87
 -14   3   2   -3.30   18.88
  -4 -11  -2   16.59   17.01
 -15   4   2   16.57   14.33
 -15   4   2   43.42   23.39
 -12  -2  -2    0.50   13.94
 -14  12   2   -0.01   22.40
 -14  12   2   10.50   24.14
   2 -14   2   34.49   19.37
 -12  -1  -2   25.52   14.50
   1 -13   2   15.54   16.97
 -13  12   2   62.13   27.38
 -13  12   2   46.89   20.78
 -12   0  -2   -2.23   12.57
 -12  12   2    0.59   16.62
 -12  12   2   17.41   22.25
   0 -12   2   12.13   16.66
 -12   1  -2   76.21   19.71
 -12   1  -2   55.87   15.78
 -11  12   2   39.07   19.53
  -1 -11   2   35.35   15.53
 -11  12   2   84.28   25.60
 -12   2  -2   22.55   14.29
 -12   2  -2   53.94   19.26
 -10  12   2   24.07   20.66
  -2 -10   2   24.08   13.46
 -10  12   2   34.10   19.15
 -12   3  -2   79.17   17.32
 -12   3  -2   94.28   22.45
  -3  -9   2  104.76   16.31
  -9  12   2   78.12   20.75
  -9  12   2  108.60   23.23
 -12   4  -2    4.08   17.09
   8 -12  -2   20.09   17.90
  -8  12   2  -12.48   14.63
  -8  12   2   28.54   17.47
  -4  -8   2   -7.60   10.98
 -12   5  -2   34.63   14.75
 -12   5  -2   81.85   21.19
   7 -12  -2   47.46   21.31
  -5  -7   2   27.13   14.67
  -7  12   2   14.62   15.06
  -7  12   2   41.47   16.10
 -12   6  -2   85.32   22.96
 -12   6  -2   74.16   17.65
   6 -12  -2   65.36   23.77
  -6  -6   2  122.32   16.35
  -6  -6   2   88.58   14.60
  -6  12   2   61.27   16.39
 -12   7  -2   23.95   22.83
   5 -12  -2   16.18   18.27
 -12   7  -2   59.43   18.27
  -7  -5   2   26.57   10.59
  -5  12   2   37.67   20.22
  -7  -5   2   43.00   13.05
   4 -12  -2  -13.58   15.24
 -12   8  -2    2.36   20.40
 -12   8  -2   16.10   18.36
  -8  -4   2   -4.30   10.46
  -8  -4   2  -10.38   17.05
 -12   9  -2  116.31   23.40
 -12   9  -2  131.27   25.13
   3 -12  -2   92.33   23.87
  -9  -3   2   87.98   13.42
  -9  -3   2  109.62   16.02
 -12  10  -2   58.35   22.51
   2 -12  -2  101.70   33.63
 -12  10  -2   37.27   18.59
 -10  -2   2   34.05   12.34
 -10  -2   2   41.09   11.24
 -12  11  -2   47.38   24.35
 -12  11  -2  101.49   25.52
   1 -12  -2   33.66   17.30
 -11  -1   2   60.34   12.54
   0 -12  -2    6.89   15.50
 -12  12  -2   13.38   20.19
 -12  12  -2   39.44   29.56
 -12   0   2    8.88   22.29
 -12   0   2    7.99   11.00
  -1 -12  -2   33.37   17.39
 -12  13  -2    9.89   19.84
 -13   1   2   52.33   13.20
  -2 -12  -2    7.68   17.12
 -12  14  -2   31.70   20.70
 -14   2   2   10.06   11.80
 -13  -1  -2   14.72   14.81
 -14  13   2   60.08   29.87
 -14  13   2  -66.55   23.92
   1 -14   2   -1.08   17.99
 -13   0  -2   54.45   17.18
 -13  13   2   52.75   26.85
 -13  13   2    7.43   19.92
   0 -13   2    2.97   16.81
 -13   1  -2   44.36   16.30
  -1 -12   2   32.23   16.33
 -12  13   2   80.52   26.75
 -12  13   2   58.96   29.89
 -13   2  -2   19.61   18.16
 -13   2  -2   -7.01   13.79
 -11  13   2   17.13   22.02
 -11  13   2   -1.77   18.24
  -2 -11   2   -4.81   13.62
 -13   3  -2    8.41   18.03
 -13   3  -2  -14.18   13.82
 -10  13   2   -6.53   26.04
 -10  13   2   26.28   20.28
  -3 -10   2  -15.05   11.83
 -13   4  -2    5.21   18.42
 -13   4  -2   32.17   16.97
  -9  13   2   40.11   20.33
  -4  -9   2   24.15   13.16
 -13   5  -2   21.09   18.54
 -13   5  -2   -1.12   13.26
   8 -13  -2   -4.77   20.44
  -8  13   2   51.79   18.34
  -5  -8   2   -7.46   10.65
   7 -13  -2   35.20   20.50
 -13   6  -2   43.19   22.61
 -13   6  -2   49.85   17.32
  -6  -7   2   39.86   12.49
  -7  13   2   83.30   23.26
 -13   7  -2   37.57   18.00
   6 -13  -2   29.80   18.87
 -13   7  -2   51.68   21.03
  -7  -6   2   46.74   11.96
 -13   8  -2   -5.78   20.32
   5 -13  -2    5.33   18.81
 -13   8  -2   18.97   18.75
  -8  -5   2   15.08   10.10
   4 -13  -2    3.05   21.11
 -13   9  -2   49.02   22.96
 -13   9  -2   37.70   20.41
  -9  -4   2   43.24   11.04
   3 -13  -2   -4.57   19.12
 -13  10  -2   11.70   17.99
 -13  10  -2   15.07   21.92
 -10  -3   2    2.99    9.71
 -13  11  -2   -1.76   19.50
 -13  11  -2    3.86   16.46
   2 -13  -2   -4.74   17.22
   1 -13  -2   83.92   21.58
 -13  12  -2   58.26   23.69
 -13  12  -2   27.50   17.53
 -13  13  -2   38.43   22.11
   0 -13  -2    9.11   20.77
  -1 -13  -2   -6.84   17.18
 -13  14  -2   32.92   28.12
 -14   1   2   -1.11   12.10
 -14   1  -2    5.51   15.77
 -13  14   2   26.45   27.62
  -1 -13   2    1.50   17.05
 -14   2  -2    2.66   16.83
 -12  14   2   25.41   24.07
  -2 -12   2   64.01   21.57
 -14   3  -2    0.41   13.41
 -14   3  -2   38.35   20.28
 -11  14   2   19.00   23.23
  -3 -11   2  -10.48   14.18
 -14   4  -2   13.21   14.63
 -14   4  -2   39.44   20.29
  -4 -10   2   34.44   14.94
 -10  14   2   42.33   21.75
 -14   5  -2  137.33   22.70
 -14   5  -2  156.20   28.09
  -5  -9   2  130.77   18.97
 -14   6  -2   49.99   22.47
 -14   6  -2   32.93   16.80
  -6  -8   2   36.41   13.01
   7 -14  -2   64.11   25.78
 -14   7  -2   39.30   18.50
 -14   7  -2   47.46   22.47
  -7  -7   2   50.63   13.02
 -14   8  -2   44.54   20.63
   6 -14  -2    9.52   22.65
 -14   8  -2   65.40   24.58
  -8  -6   2   46.57   12.00
 -14   9  -2  138.68   29.55
   5 -14  -2  101.80   24.12
 -14   9  -2  153.30   26.04
 -14  10  -2   11.02   21.12
 -14  10  -2   -4.05   17.64
   4 -14  -2   24.18   22.24
 -14  11  -2   17.79   24.48
 -14  11  -2   16.73   22.25
   3 -14  -2    7.08   18.51
 -14  12  -2   44.42   23.01
   2 -14  -2   -7.90   17.90
 -14  12  -2   -3.43   20.93
   1 -14  -2  -14.29   22.35
 -14  13  -2   33.34   23.79
 -15   4  -2   18.27   15.42
 -15   4  -2   24.53   20.54
  -4 -11   2   11.05   15.22
 -15   5  -2   47.95   22.73
 -15   6  -2  -17.74   14.65
 -15   6  -2   23.67   21.52
  -6  -9   2   -0.17   12.21
 -15   7  -2   25.25   18.14
 -15   7  -2   31.35   22.16
  -7  -8   2    6.79   11.66
 -15   8  -2   22.63   23.24
 -15   8  -2   -0.81   18.56
  -8  -7   2  -11.36   10.18
 -15   9  -2  -34.93   18.24
 -15   9  -2   23.05   22.72
   6 -15  -2   -3.55   18.45
 -15  10  -2    3.30   21.12
   5 -15  -2   23.09   25.05
 -15  11  -2   28.46   22.99
   4 -15  -2  -29.53   18.12
 -15  11  -2   11.54   24.83
   0   0  -3   10.30    5.40
   0   0  -3   -0.01    3.19
   0   0   3   -2.50    3.79
   0   0   3    1.21    3.45
   0   1  -3  338.81   22.14
  -1   0  -3  312.65   21.84
   0   1  -3  316.27   20.71
   1  -1  -3  345.30   22.35
  -1   0  -3  324.09   22.34
   0   1  -3  314.92   20.76
   1  -1  -3  309.23   22.09
  -1   0  -3  322.83   22.03
   1  -1  -3  341.59   21.42
   1   0   3  314.23   21.86
   0  -1   3  337.81   21.90
   0  -1   3  326.93   21.02
   0  -1   3  305.35   20.86
   1   0   3  330.39   21.95
  -1   1   3  324.94   21.55
  -1   1   3  311.60   22.53
   1   0   3  340.22   21.84
   0  -1  -3  318.32   21.51
   1   0  -3  300.43   19.47
  -1   1  -3  312.99   21.28
   0  -1  -3  320.80   21.48
  -1   1  -3  336.13   22.53
   0  -1  -3  305.03   21.12
  -1   1  -3  333.64   21.46
   1  -1   3  343.57   22.13
  -1   0   3  302.36   19.59
   0   1   3  309.65   21.47
   1  -1   3  335.71   21.34
   0   1   3  313.96   21.54
  -1   0   3  320.54   19.64
  -1  -1  -3    4.76    6.73
  -1   2  -3   24.23    8.36
   2  -1  -3  -10.06    4.96
  -1  -1  -3    1.19    6.03
   2  -1  -3   -1.82    8.51
   2  -1  -3    5.22    4.72
  -1   2  -3   -7.42    5.80
  -1  -1  -3   -5.95    7.27
  -1   2  -3   -8.91    5.30
  -2   1   3   -5.71    5.10
  -2   1   3    3.64    8.18
   1  -2   3   -0.87    5.55
   1   1   3    4.73    6.25
   1   1   3    8.09    4.81
   1  -2   3   11.70    6.69
   1  -2   3   -4.05    7.01
   1   1   3   -6.08    5.81
  -2   1   3    4.18    5.05
  -2  -1  -3  402.00   27.49
   3  -2  -3  412.36   27.94
   3  -2  -3  367.18   30.47
  -1   3  -3  437.24   28.31
  -1   3  -3  406.13   28.21
  -2  -1  -3  418.23   28.13
   3  -2  -3  396.02   27.58
  -1   3  -3  398.48   28.21
  -3   2   3  379.72   30.50
   2   1   3  439.81   27.27
   1  -3   3  382.29   28.42
  -3   2   3  398.81   27.91
   2   1   3  361.28   27.79
  -3   2   3  365.26   27.52
   2   1   3  398.71   28.20
   1  -3   3  428.09   28.19
  -2   0  -3    9.06    8.34
   2  -2  -3   14.69    6.05
   2  -2  -3   24.29    9.18
   0   2  -3    9.44    5.86
   0   2  -3    1.54    6.62
   2  -2  -3   17.78    7.00
  -2   0  -3   15.26    6.35
   0   2  -3   23.24    6.13
  -2   0  -3   17.39    7.29
   2   0   3   17.48    6.95
   2   0   3   10.99    6.98
  -2   2   3   10.01    6.97
   2   0   3    7.07    7.63
   0  -2   3   21.62    6.45
   0  -2   3   11.70    6.33
  -2   2   3    6.07    8.36
   0  -2   3   16.23    6.30
  -2   1  -3   -0.99    7.00
   1  -2  -3   -3.90    6.84
   1  -2  -3   -2.99    6.28
   1  -2  -3    3.96    6.74
  -2   1  -3    3.81    7.01
  -2   1  -3   -5.08    9.18
   2  -1   3    7.50    6.73
  -1   2   3    3.02    6.46
  -1   2   3   -2.86    5.86
  -1   2   3    4.82    6.18
   2  -1   3   -5.76    7.67
   2  -1   3   -2.73    6.45
   0  -2  -3   10.73    5.16
   2   0  -3    3.50    8.20
  -2   2  -3    9.54    5.97
  -2   2  -3    3.45    7.15
  -2   2  -3   14.13    9.88
   0  -2  -3   14.42    8.08
   0  -2  -3    7.16    7.08
  -2   0   3   17.75    8.54
   0   2   3   17.45    7.63
   2  -2   3   15.19    7.67
   0   2   3   12.02    7.71
   2  -2   3    5.89    8.85
   2  -2   3    8.65    7.21
  -2   3  -3  430.69   29.17
  -2   3  -3  395.27   28.80
  -1  -2  -3  349.31   27.88
   3  -1  -3  386.90   26.27
   3  -1  -3  393.18   29.97
   3  -1  -3  395.58   26.33
  -1  -2  -3  365.76   28.17
  -1  -2  -3  423.46   25.53
  -2   3  -3  435.77   30.19
   2  -3   3  424.10   29.05
   1   2   3  422.26   25.27
   2  -3   3  422.21   29.28
   1   2   3  356.26   28.31
  -3   1   3  406.26   26.55
   1   2   3  390.51   28.52
  -3   1   3  379.89   26.40
   4  -2  -3    4.05    7.11
  -2   4  -3   -5.85    7.83
  -2  -2  -3   -1.08    5.64
   4  -2  -3   24.51   10.88
  -2   4  -3   -2.50    9.00
  -2   4  -3   14.81    7.69
   4  -2  -3   -2.47    6.76
  -2  -2  -3   -4.80    8.17
  -4   2   3    4.58    7.00
   2  -4   3    2.41    6.47
   2   2   3   -3.29    4.99
   2  -4   3   -6.07    8.26
   2  -4   3    1.65    8.39
   2   2   3   -2.37    7.63
   2   2   3    5.02    7.31
  -4   2   3   15.82   11.25
  -4   2   3    0.46    6.53
   5  -3  -3  491.45   37.54
  -3  -2  -3  531.61   32.70
  -3  -2  -3  478.01   34.06
  -2   5  -3  527.23   35.53
  -3  -2  -3  463.92   33.94
   5  -3  -3  492.81   34.20
   5  -3  -3  520.76   34.46
  -2   5  -3  474.98   34.81
  -2   5  -3  516.43   34.96
  -5   3   3  492.65   37.85
   2  -5   3  559.31   35.89
   3   2   3  462.26   33.93
   3   2   3  463.91   33.99
   2  -5   3  488.77   34.52
   2  -5   3  468.61   35.18
  -5   3   3  484.29   34.19
  -5   3   3  490.82   34.30
   3   2   3  488.92   32.29
  -1   4  -3  192.66   18.12
  -1   4  -3  191.33   17.51
   4  -3  -3  187.53   17.44
   4  -3  -3  174.97   18.64
  -1   4  -3  195.94   17.34
  -3  -1  -3  169.33   17.71
   4  -3  -3  199.14   18.93
  -3  -1  -3  197.21   17.59
   1  -4   3  179.72   18.26
   3   1   3  178.30   16.66
   3   1   3  170.61   17.46
  -4   3   3  213.89   21.75
   1  -4   3  177.41   16.95
  -4   3   3  203.05   18.27
  -3   0  -3 6812.74  405.71
   3  -3  -3 7003.41  406.02
   3  -3  -3 6682.30  405.85
   3  -3  -3 6724.12  406.57
   0   3  -3 6768.86  405.26
   0   3  -3 6684.86  404.93
  -3   0  -3 6855.19  405.91
   0   3  -3 6780.85  405.30
  -3   3   3 7072.33  406.08
  -3   3   3 6808.43  405.88
   0  -3   3 6632.82  404.89
   0  -3   3 6814.78  405.28
   0  -3   3 6567.96  405.27
   3   0   3 7047.33  405.83
   3   0   3 6812.02  405.81
  -3   3   3 6622.10  406.55
   3   0   3 6855.16  405.73
  -3   1  -3  362.58   28.05
   1   2  -3  384.00   26.08
   2  -3  -3  406.08   29.45
   1   2  -3  418.67   26.13
  -3   1  -3  426.81   30.40
   2  -3  -3  400.35   28.95
   2  -3  -3  387.73   29.24
  -3   1  -3  393.34   28.39
   1   2  -3  418.35   26.85
   3  -1   3  445.86   28.93
  -1  -2   3  401.06   26.36
   3  -1   3  418.13   29.83
  -2   3   3  415.04   29.42
  -1  -2   3  377.95   26.04
   3  -1   3  367.55   28.45
  -2   3   3  396.08   28.94
   2   1  -3  415.38   28.20
   1  -3  -3  395.89   27.46
  -3   2  -3  391.49   28.71
   1  -3  -3  418.36   29.18
  -3   2  -3  389.38   28.96
   1  -3  -3  400.34   29.14
  -1   3   3  386.33   29.06
  -1   3   3  439.71   29.15
   3  -2   3  411.50   29.13
  -1   3   3  389.28   27.37
   3  -2   3  430.98   30.67
   3  -2   3  356.55   28.85
   0  -3  -3 6481.81  402.66
   3   0  -3 6812.38  404.59
   3   0  -3 6804.07  402.66
   3   0  -3 6889.80  402.68
  -3   3  -3 7111.28  404.86
  -3   3  -3 6773.11  404.73
   0  -3  -3 6902.85  404.58
  -3   3  -3 6830.88  405.21
  -3   0   3 6618.97  404.50
   3  -3   3 6777.38  405.12
  -3   0   3 6758.21  402.68
  -3   0   3 6586.97  402.62
   0   3   3 6768.14  404.47
   0   3   3 6711.83  404.39
   3  -3   3 6754.28  404.71
   3  -3   3 6766.30  404.71
  -1  -3  -3  171.13   17.05
  -3   4  -3  178.08   19.68
  -3   4  -3  181.35   18.86
   4  -1  -3  166.91   14.76
  -3   4  -3  159.54   16.98
   4  -1  -3  193.01   14.64
   4  -1  -3  199.97   18.57
  -1  -3  -3  178.94   17.83
   3  -4   3  178.59   17.41
   3  -4   3  179.02   18.05
   1   3   3  200.61   17.86
   1   3   3  172.82   17.56
  -4   1   3  183.67   18.35
  -4   1   3  167.76   14.95
  -4   1   3  143.80   14.78
   5  -2  -3  483.06   32.80
  -2  -3  -3  470.55   34.05
   5  -2  -3  483.87   37.05
   5  -2  -3  494.77   32.91
  -3   5  -3  465.47   34.94
  -3   5  -3  472.94   35.66
  -3   5  -3  482.64   35.28
  -5   2   3  533.39   33.19
  -5   2   3  477.54   32.73
  -5   2   3  481.61   36.95
   3  -5   3  492.45   35.18
   2   3   3  509.87   34.04
   3  -5   3  498.84   35.82
   2   3   3  488.64   35.97
   3  -5   3  461.46   35.31
  -3  -3  -3    6.28    5.50
  -3   6  -3    9.24    9.16
  -3   6  -3   10.53   11.53
   6  -3  -3    8.07    8.44
  -3  -3  -3   11.01    8.38
  -3  -3  -3    0.53    7.89
  -3   6  -3   22.44   10.74
   6  -3  -3   -6.64   11.90
   6  -3  -3  -16.96    7.07
   3   3   3   -2.66    4.68
   3  -6   3  -16.92    9.46
  -6   3   3   -0.07    8.58
  -6   3   3  -10.63    7.02
   3  -6   3   -7.21    9.54
  -6   3   3  -20.77   11.79
   3   3   3  -14.35    7.80
   3  -6   3   -7.33    9.00
   3   3   3    0.06    7.37
  -3   7  -3   27.07    9.30
  -4  -3  -3   48.68   10.97
  -3   7  -3   26.73   11.37
   7  -4  -3   40.71   10.83
  -3   7  -3   50.21   13.22
   7  -4  -3   24.67   15.21
   7  -4  -3   31.70   10.49
  -4  -3  -3   31.00    7.76
  -4  -3  -3   52.95   11.35
  -7   4   3   39.76   10.62
   4   3   3   37.06    7.53
  -7   4   3   44.18   11.95
   3  -7   3   42.72   13.88
   3  -7   3   35.97   11.31
   4   3   3   56.37   10.93
   4   3   3   27.47   10.02
  -7   4   3   23.09   15.29
   3  -7   3   19.59    9.10
  -2   6  -3   40.66   10.94
  -2   6  -3   57.93   11.37
   6  -4  -3   46.93   11.11
  -4  -2  -3   44.18    9.27
  -4  -2  -3   47.22    9.40
  -2   6  -3   25.23   10.09
   6  -4  -3   53.66   11.56
   6  -4  -3   54.57   14.14
  -4  -2  -3   40.55    9.87
  -6   4   3   57.03   15.03
   4   2   3   48.73    9.18
   4   2   3   44.30    9.11
  -6   4   3   39.00   11.01
   2  -6   3   26.61    9.37
   2  -6   3   61.68   12.12
   4   2   3   63.12   10.51
   2  -6   3   33.36   12.81
  -4  -1  -3  880.47   54.22
   5  -4  -3  799.08   54.93
  -1   5  -3  798.06   54.65
  -4  -1  -3  816.81   54.13
  -1   5  -3  876.47   53.62
  -1   5  -3  849.90   54.57
   5  -4  -3  854.86   57.24
   5  -4  -3  819.39   54.71
  -4  -1  -3  855.50   54.41
   1  -5   3  832.85   53.38
   1  -5   3  839.92   54.84
  -5   4   3  835.30   55.12
   4   1   3  862.97   54.29
  -5   4   3  834.10   54.47
   4   1   3  889.41   54.39
   4   1   3  868.18   54.13
  -5   4   3  795.78   57.09
   0   4  -3  318.32   23.11
  -4   0  -3  333.43   25.41
  -4   0  -3  316.28   26.80
   4  -4  -3  367.42   26.43
   0   4  -3  351.51   24.56
   4  -4  -3  314.99   28.34
   0   4  -3  346.15   24.75
   4  -4  -3  354.37   26.70
  -4   4   3  354.05   26.14
   4   0   3  326.51   26.36
   0  -4   3  346.98   25.16
  -4   4   3  344.36   28.33
   4   0   3  319.55   25.10
   0  -4   3  309.31   23.05
   0  -4   3  319.38   24.75
   4   0   3  318.76   26.95
   3  -4  -3  190.71   18.82
   1   3  -3  179.30   15.31
  -4   1  -3  159.32   17.50
   3  -4  -3  175.35   18.37
  -4   1  -3  175.42   16.69
   3  -4  -3  193.00   20.09
   1   3  -3  153.74   15.30
   1   3  -3  191.12   14.54
  -3   4   3  148.81   15.97
  -1  -3   3  187.59   15.66
   4  -1   3  187.04   17.87
  -3   4   3  168.28   16.99
   4  -1   3  178.80   17.81
  -1  -3   3  166.69   15.62
   4  -1   3  187.55   17.71
  -3   4   3  177.47   18.28
  -4   2  -3   -5.26   11.29
   2  -4  -3    6.46    8.74
   2   2  -3    1.48    4.98
   2  -4  -3   11.56    8.50
   2  -4  -3    3.53   10.62
  -4   2  -3   -8.57    8.52
  -4   2  -3    5.19    7.71
   2   2  -3    3.95    5.18
   2   2  -3   -3.05    6.81
   4  -2   3    7.30    8.00
  -2   4   3    1.62    8.25
   4  -2   3   21.90   11.37
  -2  -2   3   -0.30    4.93
  -2   4   3   -3.13    7.87
  -2  -2   3   -0.81    4.90
   4  -2   3  -12.22    7.97
  -2   4   3    1.65    8.44
   1  -4  -3  194.29   16.09
  -4   3  -3  191.13   18.94
   1  -4  -3  212.06   19.13
   3   1  -3  191.32   17.63
   3   1  -3  179.95   13.39
   3   1  -3  184.36   13.42
  -4   3  -3  167.16   18.78
  -4   3  -3  150.45   16.64
  -3  -1   3  174.79   13.55
   4  -3   3  193.59   17.52
   4  -3   3  149.91   16.44
   4  -3   3  201.25   21.57
  -3  -1   3  169.65   13.46
  -1   4   3  182.45   17.57
  -1   4   3  196.44   15.65
  -3  -1   3  175.77   17.69
   4   0  -3  342.19   22.47
   4   0  -3  336.44   22.39
  -4   4  -3  323.72   26.49
   0  -4  -3  317.51   25.76
  -4   4  -3  337.10   29.46
  -4   4  -3  344.54   27.16
   0  -4  -3  327.01   21.63
   4   0  -3  299.21   26.68
   0  -4  -3  307.32   26.17
   4  -4   3  354.26   27.41
   0   4   3  345.31   26.51
   4  -4   3  346.59   26.80
   0   4   3  340.07   26.35
  -4   0   3  327.48   22.53
  -4   0   3  327.61   27.03
  -4   0   3  352.13   22.69
   4  -4   3  343.29   28.34
   5  -1  -3  869.03   56.45
  -1  -4  -3  816.81   54.46
   5  -1  -3  830.53   52.46
   5  -1  -3  831.94   52.60
  -4   5  -3  853.37   56.83
  -4   5  -3  885.15   56.05
  -4   5  -3  863.72   55.68
  -1  -4  -3  799.44   54.65
  -5   1   3  835.80   56.17
   1   4   3  838.80   54.70
   4  -5   3  834.37   55.59
   4  -5   3  805.70   56.11
   4  -5   3  874.77   55.92
   1   4   3  851.53   54.64
  -5   1   3  803.83   52.56
  -5   1   3  860.38   52.62
  -4   6  -3   69.73   13.30
  -2  -4  -3   42.69    9.75
   6  -2  -3   32.64    8.16
  -4   6  -3   31.13   13.16
   6  -2  -3   51.44    9.46
  -4   6  -3   65.44   12.99
   4  -6   3   53.58   13.75
  -6   2   3   49.93    9.22
   4  -6   3   61.95   12.87
   2   4   3   55.85   11.53
   4  -6   3   58.51   13.36
  -6   2   3   38.78    8.96
  -6   2   3   37.90   13.92
  -3  -4  -3   38.19    9.98
  -4   7  -3   31.24   13.25
   7  -3  -3    7.62   13.08
  -4   7  -3   28.39   13.06
  -4   7  -3   33.99   10.46
  -3  -4  -3   38.13   11.47
   7  -3  -3   35.84    9.57
   7  -3  -3   26.09    8.90
   4  -7   3   47.50   12.64
  -7   3   3   32.42    9.91
  -7   3   3   35.61    9.36
  -7   3   3   14.84   15.08
   3   4   3   38.78   10.04
   3   4   3   37.48   10.28
   4  -7   3   27.05   10.58
   4  -7   3   42.50   12.92
  -4   8  -3    1.48   10.73
  -4   8  -3   -2.16   11.44
  -4  -4  -3   -4.58    8.91
   8  -4  -3  -13.33    9.33
   8  -4  -3    4.27   10.67
  -4   8  -3    5.26   12.24
   8  -4  -3  -12.37   14.61
  -8   4   3    8.66    9.65
   4   4   3   -0.39    9.62
   4   4   3    2.74    8.76
   4  -8   3    4.39   13.64
   4  -8   3  -13.36   10.61
  -8   4   3    1.91   15.96
  -8   4   3  -15.34    8.67
   9  -5  -3  456.96   46.20
  -5  -4  -3  528.09   38.01
  -4   9  -3  487.35   41.13
   9  -5  -3  557.53   39.42
  -4   9  -3  502.91   39.43
   9  -5  -3  515.91   39.16
  -4   9  -3  475.07   40.31
   4  -9   3  556.72   41.73
  -9   5   3  485.06   38.21
   5   4   3  495.15   38.05
  -9   5   3  542.39   39.53
   4  -9   3  536.24   42.21
  -9   5   3  532.45   45.16
   5   4   3  534.97   33.35
   4  -9   3  489.34   39.72
   5   4   3  506.43   38.44
   8  -5  -3   -0.65   11.41
  -3   8  -3  -10.38   10.48
   8  -5  -3  -27.63   15.35
  -5  -3  -3    9.77    9.66
   8  -5  -3    1.10   10.28
  -5  -3  -3    2.92    9.96
  -3   8  -3   -0.47   11.42
  -5  -3  -3   -2.50    7.70
  -3   8  -3   -5.36   11.09
  -8   5   3   15.78   10.41
   3  -8   3    3.75   11.55
   3  -8   3  -18.95    9.30
   5   3   3   -3.93    7.25
   5   3   3   -8.44    9.45
   5   3   3    2.53    8.94
   3  -8   3  -20.01   10.67
  -8   5   3   -2.99   15.55
  -8   5   3   -5.02   10.50
   7  -5  -3 1248.09   78.91
  -5  -2  -3 1317.15   78.15
  -2   7  -3 1174.33   79.03
   7  -5  -3 1211.77   78.97
  -5  -2  -3 1265.99   77.34
   7  -5  -3 1227.17   81.84
  -5  -2  -3 1192.72   77.46
  -2   7  -3 1291.71   77.67
  -2   7  -3 1176.99   78.79
   5   2   3 1215.06   77.78
   2  -7   3 1266.89   82.50
   5   2   3 1243.49   77.90
  -7   5   3 1214.36   79.28
   2  -7   3 1271.40   79.41
   2  -7   3 1143.66   77.12
   5   2   3 1245.15   77.01
  -7   5   3 1188.56   81.77
  -5  -1  -3   -2.13    9.84
   6  -5  -3    7.76    9.52
  -5  -1  -3   -6.81    7.85
  -1   6  -3    9.87    7.67
   6  -5  -3   15.59   13.42
  -1   6  -3    1.98    8.12
  -1   6  -3    8.00    9.85
  -5  -1  -3    0.10    8.61
   6  -5  -3   24.97   11.87
  -6   5   3   22.61   10.61
   5   1   3   -4.03    7.43
   5   1   3   12.12    9.26
  -6   5   3   -1.03   12.39
  -6   5   3    7.82    8.11
   5   1   3    4.25    8.29
   1  -6   3    3.61    8.65
   1  -6   3    4.91    7.04
  -5   0  -3  113.38   14.78
   0   5  -3  117.74   12.22
   5  -5  -3  123.44   16.88
   0   5  -3   99.75   12.51
   5  -5  -3   94.54   13.99
  -5   0  -3  107.19   12.16
   5  -5  -3   93.64   12.80
  -5   0  -3   74.64   11.96
   5   0   3  107.93   12.33
   0  -5   3   92.49   11.65
   0  -5   3   95.86   13.15
   5   0   3  119.48   14.57
  -5   5   3  108.02   16.42
   5   0   3  112.00   14.20
  -5   5   3   95.93   14.26
   0  -5   3  107.50   11.34
  -5   5   3   90.95   13.84
   1   4  -3  864.74   53.38
  -5   1  -3  849.02   55.88
  -5   1  -3  829.62   54.46
   1   4  -3  801.12   51.87
   4  -5  -3  881.25   55.48
   1   4  -3  887.92   53.41
   4  -5  -3  854.95   55.72
   4  -5  -3  779.44   55.99
  -1  -4   3  819.36   53.35
  -4   5   3  830.31   56.05
   5  -1   3  856.37   56.09
  -1  -4   3  865.77   53.37
  -4   5   3  806.03   55.74
  -4   5   3  873.19   55.46
   5  -1   3  799.76   54.22
   2   3  -3  476.41   31.33
   2   3  -3  507.06   31.38
   2   3  -3  482.55   31.26
   3  -5  -3  475.65   35.24
   2   3  -3  497.98   31.35
  -5   2  -3  452.87   33.50
   3  -5  -3  443.64   34.33
  -5   2  -3  460.33   36.27
   3  -5  -3  466.83   34.58
  -5   2  -3  477.88   34.05
  -3   5   3  461.84   34.54
  -3   5   3  464.35   34.31
   5  -2   3  514.26   33.88
   5  -2   3  450.43   33.80
  -2  -3   3  464.84   31.44
  -3   5   3  449.32   34.84
   5  -2   3  479.34   36.04
  -2  -3   3  497.39   31.47
   3   2  -3  491.29   31.68
   2  -5  -3  496.28   34.26
  -5   3  -3  469.79   35.25
   3   2  -3  492.61   33.56
  -5   3  -3  523.18   38.23
   3   2  -3  498.79   31.71
   2  -5  -3  466.87   35.80
  -5   3  -3  534.60   35.54
   2  -5  -3  522.90   36.39
  -3  -2   3  490.51   31.71
  -2   5   3  482.17   33.95
  -2   5   3  495.66   35.91
  -3  -2   3  501.16   31.86
   5  -3   3  478.53   35.60
  -2   5   3  490.88   36.14
   5  -3   3  504.31   37.53
   4   1  -3  829.92   52.28
   4   1  -3  851.73   52.25
   1  -5  -3  802.33   55.66
  -5   4  -3  850.20   56.40
   1  -5  -3  845.87   53.10
   1  -5  -3  839.54   55.92
  -5   4  -3  921.97   56.19
   4   1  -3  847.48   54.93
  -5   4  -3  922.28   58.14
  -4  -1   3  863.90   52.30
  -4  -1   3  855.10   55.08
  -1   5   3  793.14   55.65
   5  -4   3  854.50   56.18
  -1   5   3  839.02   52.84
   5  -4   3  778.07   57.15
  -4  -1   3  875.42   52.39
   5  -4   3  875.43   56.38
   5   0  -3  104.45   14.50
   0  -5  -3   80.81   12.07
  -5   5  -3  120.24   17.33
   5   0  -3  129.17   10.67
  -5   5  -3   75.66   13.52
   0  -5  -3   88.33   14.23
  -5   5  -3   65.86   12.64
   5  -5   3  132.15   16.56
   5  -5   3  110.63   16.80
  -5   0   3  105.61   10.43
  -5   0   3   93.38   14.39
  -5   0   3  113.15   10.33
   5  -5   3   90.80   15.19
   0   5   3  124.80   15.18
   0   5   3  108.80   13.89
  -5   6  -3    6.89   11.23
  -5   6  -3   16.26   12.73
   6  -1  -3    6.22    6.79
  -1  -5  -3    0.99    5.77
  -5   6  -3    2.64    7.85
   6  -1  -3    8.00    7.00
  -1  -5  -3   15.97    8.49
   6  -1  -3   -4.20   12.91
   1   5   3   11.75    9.63
   5  -6   3    9.75   10.63
   1   5   3    0.74    8.06
  -6   1   3    1.88    6.87
  -6   1   3   -6.46   11.43
  -6   1   3    5.73    7.13
   5  -6   3   18.82   11.33
   5  -6   3   18.48   12.33
   7  -2  -3 1261.50   76.99
  -2  -5  -3 1318.27   78.99
   7  -2  -3 1267.76   81.41
  -5   7  -3 1244.49   80.39
  -5   7  -3 1119.35   80.29
   7  -2  -3 1183.74   76.79
  -5   7  -3 1265.42   81.08
  -7   2   3 1121.95   76.57
   5  -7   3 1285.04   81.00
   2   5   3 1214.40   78.79
  -7   2   3 1230.76   77.08
   2   5   3 1200.22   78.56
   5  -7   3 1245.15   80.72
   5  -7   3 1312.55   80.66
  -5   8  -3   -4.51   10.95
  -3  -5  -3   -0.18    9.78
  -5   8  -3   10.48   13.98
   8  -3  -3  -13.42    7.88
  -3  -5  -3   11.31   10.62
   8  -3  -3   15.34   16.21
   8  -3  -3  -10.11    8.25
  -5   8  -3  -13.41   11.31
  -8   3   3  -11.78   14.50
   3   5   3   -3.82    8.23
  -8   3   3   -5.68    8.41
   5  -8   3  -19.21   12.85
   5  -8   3  -20.54   11.39
   3   5   3  -10.35    9.27
  -8   3   3   -0.96    8.40
   5  -8   3  -14.51   12.21
   9  -4  -3  499.57   37.35
  -4  -5  -3  505.64   37.95
  -5   9  -3  441.20   39.39
   9  -4  -3  543.71   45.44
   9  -4  -3  499.62   37.44
  -4  -5  -3  512.58   37.87
  -5   9  -3  505.15   40.86
  -5   9  -3  508.81   41.65
   5  -9   3  496.33   40.39
   5  -9   3  571.14   42.65
  -9   4   3  501.26   37.11
   4   5   3  510.54   37.60
  -9   4   3  491.26   43.99
  -9   4   3  491.60   37.27
   4   5   3  487.18   37.43
  10  -5  -3    2.26   11.44
  10  -5  -3  -30.04   15.69
  -5  10  -3    0.38   15.97
  -5  -5  -3    0.64    9.63
  -5  -5  -3   -3.03    9.78
  -5  10  -3   18.09   13.08
  10  -5  -3  -15.40    9.44
  -5  10  -3    5.62   13.34
 -10   5   3   -2.48    9.97
 -10   5   3   36.79   19.17
   5 -10   3   -1.39   13.08
 -10   5   3    5.36   11.18
   5 -10   3   -2.10    9.31
   5 -10   3  -11.37   12.50
   5   5   3   -8.31    9.95
   5   5   3   13.22    9.77
  -5  11  -3    6.09   13.70
  -6  -5  -3    8.43   11.62
  -6  -5  -3   10.90   11.64
  -5  11  -3   15.44   17.18
  -5  11  -3   24.43   16.28
   5 -11   3   -4.22   15.56
 -11   6   3   32.57   14.27
   5 -11   3    3.42   16.78
 -11   6   3    7.68   19.04
  -4  10  -3   61.97   16.79
  10  -6  -3   43.07   14.75
  10  -6  -3   40.61   19.73
  -4  10  -3   38.48   14.11
  10  -6  -3   52.08   13.14
  -4  10  -3   22.57   14.43
  -6  -4  -3   64.79   13.50
   6   4   3   54.63   13.66
 -10   6   3   62.44   15.31
   4 -10   3   68.88   18.81
 -10   6   3   70.39   20.22
   6   4   3   92.93   15.24
   4 -10   3   46.73   17.14
 -10   6   3   48.03   12.48
   6   4   3   58.34    9.37
   4 -10   3   52.75   14.40
  -6  -3  -3   92.56   12.15
  -6  -3  -3   86.90   14.02
  -3   9  -3   81.30   16.16
  -3   9  -3   70.87   15.35
  -3   9  -3   72.53   13.94
   9  -6  -3  103.71   17.14
  -6  -3  -3  111.03   14.62
   9  -6  -3   80.02   21.95
  -9   6   3   94.09   15.87
   3  -9   3   69.81   13.41
   3  -9   3  121.83   19.32
   3  -9   3   72.59   15.11
   6   3   3  129.39   16.11
   6   3   3   64.56   11.64
  -9   6   3   77.90   20.24
   6   3   3   90.67   14.52
   8  -6  -3  203.51   24.33
   8  -6  -3  271.28   29.81
  -6  -2  -3  257.82   24.66
  -2   8  -3  261.31   24.31
  -6  -2  -3  288.76   24.86
  -2   8  -3  297.86   27.11
  -6  -2  -3  270.66   23.87
  -2   8  -3  253.32   26.05
   8  -6  -3  315.72   27.61
   6   2   3  278.97   24.75
  -8   6   3  246.54   25.60
  -8   6   3  302.31   28.73
   2  -8   3  300.71   28.60
   2  -8   3  300.33   23.86
  -8   6   3  299.13   31.27
   2  -8   3  274.87   26.76
   6   2   3  266.34   24.38
   6   2   3  299.51   25.43
  -6  -1  -3  390.65   31.43
  -6  -1  -3  351.53   29.75
  -1   7  -3  366.88   28.34
   7  -6  -3  371.35   32.22
   7  -6  -3  407.20   32.72
  -1   7  -3  373.15   30.88
  -6  -1  -3  410.75   29.88
   7  -6  -3  362.44   37.37
  -7   6   3  401.64   32.23
   1  -7   3  408.06   27.88
   1  -7   3  419.10   32.33
  -7   6   3  427.10   33.74
  -7   6   3  417.85   36.42
   6   1   3  388.55   30.06
   6   1   3  380.36   29.81
   6   1   3  367.14   31.15
  -6   0  -3 1270.84   83.36
   0   6  -3 1236.98   79.52
  -6   0  -3 1326.58   82.25
   6  -6  -3 1194.88   85.15
   6  -6  -3 1249.25   83.47
   0   6  -3 1319.61   82.30
  -6   0  -3 1324.75   82.01
   0   6  -3 1299.23   82.07
   6  -6  -3 1352.78   83.98
  -6   6   3 1267.77   83.80
  -6   6   3 1426.00   84.05
  -6   6   3 1249.29   88.02
   0  -6   3 1397.09   82.78
   6   0   3 1380.11   82.40
   0  -6   3 1295.83   82.24
   6   0   3 1230.41   82.96
   6   0   3 1302.67   82.02
   1   5  -3    0.85    5.15
  -6   1  -3   12.17    8.56
  -6   1  -3  -14.57   11.34
   5  -6  -3    7.97   11.12
  -6   1  -3    2.48    8.35
   1   5  -3   -3.73    7.45
   5  -6  -3    0.12    8.61
   6  -1   3   -8.92   11.48
  -1  -5   3   -2.27    7.77
  -5   6   3  -10.11   11.96
  -5   6   3   -4.84    8.38
   6  -1   3    6.61    7.94
  -1  -5   3  -11.09    7.47
   6  -1   3    3.03    7.75
  -5   6   3    0.38   10.72
   4  -6  -3   16.47    6.78
   2   4  -3   51.76    8.59
   4  -6  -3   57.37   13.31
   2   4  -3   33.68    6.53
   2   4  -3   39.21    6.93
  -6   2  -3   56.05   11.73
  -6   2  -3   29.82   14.02
   4  -6  -3   57.28   13.24
   2   4  -3   53.99    8.87
   6  -2   3   37.51   15.16
  -2  -4   3   36.44    8.68
  -4   6   3   46.36   12.20
  -4   6   3   48.79   12.15
   6  -2   3   77.35   12.69
  -2  -4   3   48.10    8.59
   6  -2   3   44.35   12.69
  -4   6   3   49.41   11.74
   3  -6  -3   -1.83    9.82
  -6   3  -3   -4.25    9.12
  -6   3  -3  -18.65   12.75
   3   3  -3   -3.68    6.71
   3  -6  -3   -5.73    9.20
   3  -6  -3   -3.17    9.45
   3   3  -3   -1.39    5.90
  -6   3  -3   -6.07    8.46
   3   3  -3   10.24    6.30
   6  -3   3   -5.71    7.91
  -3  -3   3   -4.08    5.43
  -3   6   3    4.53    8.88
   6  -3   3    4.84    9.44
   6  -3   3   -7.54   11.83
  -3  -3   3    0.32    6.23
  -3   6   3    3.86    9.45
  -3   6   3   12.56    9.34
   2  -6  -3   36.11    9.36
  -6   4  -3   32.36   13.85
  -6   4  -3   38.01   11.62
   4   2  -3   48.22    7.40
   2  -6  -3   50.59   13.37
   4   2  -3   16.16    9.58
   2  -6  -3   57.72   12.24
   4   2  -3   48.49    7.49
  -6   4  -3   41.47   10.48
  -4  -2   3   45.05    7.52
   6  -4   3   48.37   11.01
  -2   6   3   37.37    9.09
  -2   6   3   29.84   10.98
  -2   6   3   47.23   12.17
   6  -4   3   55.54   14.42
   6  -4   3   47.96   11.45
   5   1  -3   -5.95    8.98
   5   1  -3    9.03    5.91
   1  -6  -3    4.16    8.59
  -6   5  -3    5.35   14.07
   5   1  -3   12.11    6.15
   1  -6  -3   16.96   10.48
  -6   5  -3   24.11   11.44
   1  -6  -3   11.98    6.53
  -6   5  -3   -4.57    7.41
   6  -5   3   13.49   14.55
   6  -5   3    1.85   10.17
  -1   6   3   -0.59    5.70
  -5  -1   3    1.88    6.12
  -1   6   3    1.98    7.91
   6  -5   3   21.09   10.99
  -5  -1   3  -12.13    8.89
  -5  -1   3    9.67    6.12
   6   0  -3 1318.95   79.84
   0  -6  -3 1268.57   83.18
   0  -6  -3 1320.40   83.16
  -6   6  -3 1334.87   84.43
   6   0  -3 1212.22   83.23
   6   0  -3 1317.86   79.88
  -6   6  -3 1274.29   83.72
   6  -6   3 1233.14   83.79
   6  -6   3 1212.30   85.23
  -6   0   3 1309.07   83.59
   6  -6   3 1379.33   84.49
  -6   0   3 1346.52   80.03
  -6   0   3 1342.83   79.81
   0   6   3 1324.37   83.15
   0   6   3 1252.47   82.87
   7  -1  -3  397.43   35.09
  -1  -6  -3  400.53   31.99
   7  -1  -3  413.56   28.12
  -6   7  -3  365.94   33.95
  -6   7  -3  410.24   37.25
  -6   7  -3  356.58   32.93
   7  -1  -3  397.12   28.31
  -1  -6  -3  403.71   30.68
   6  -7   3  412.09   35.60
  -7   1   3  418.03   34.78
  -7   1   3  366.78   28.54
   1   6   3  376.07   31.57
   1   6   3  396.81   31.64
   6  -7   3  423.96   33.86
  -7   1   3  376.16   28.27
   6  -7   3  390.88   34.06
  -2  -6  -3  326.74   26.74
  -6   8  -3  222.43   26.39
   8  -2  -3  269.96   22.82
  -6   8  -3  201.73   23.95
  -2  -6  -3  262.76   27.36
  -6   8  -3  248.93   27.35
   8  -2  -3  312.43   29.97
   8  -2  -3  261.38   23.08
  -8   2   3  286.26   23.62
  -8   2   3  270.52   22.80
   6  -8   3  293.10   29.70
   2   6   3  304.63   26.32
   2   6   3  272.42   25.87
   6  -8   3  296.51   29.17
   6  -8   3  300.08   29.89
  -8   2   3  255.22   27.49
  -3  -6  -3   87.24   14.11
  -6   9  -3   58.46   16.61
   9  -3  -3   72.17   13.18
   9  -3  -3   58.88   19.11
  -6   9  -3  103.70   18.45
  -3  -6  -3   91.23   15.11
  -6   9  -3   68.34   15.83
  -9   3   3   61.93   19.19
  -9   3   3  106.80   13.86
   6  -9   3   94.88   17.87
   6  -9   3   59.23   17.64
   3   6   3   74.97   14.81
   3   6   3   86.33   14.46
  -9   3   3   76.18   12.95
  -4  -6  -3   38.20   13.83
  10  -4  -3   53.55   20.08
  10  -4  -3   44.24   12.07
  10  -4  -3   57.76   13.07
  -6  10  -3   72.50   17.64
  -4  -6  -3   34.50   12.63
  -6  10  -3   26.78   15.12
  -6  10  -3   56.92   15.33
   4   6   3   42.83   12.72
 -10   4   3   49.83   19.31
   6 -10   3   34.11   16.42
   6 -10   3   27.24   13.95
   4   6   3   58.09   13.95
 -10   4   3   33.11   11.99
   6 -10   3   12.48   16.01
 -10   4   3   27.62   11.67
  -5  -6  -3   34.17   13.67
  -6  11  -3   32.50   15.95
  -6  11  -3    4.23   16.74
  -5  -6  -3   12.43   10.74
  -6  11  -3   15.84   16.06
 -11   5   3   19.29   12.49
   6 -11   3    6.82   15.28
 -11   5   3   48.57   15.08
 -11   5   3   -0.59   17.48
   6 -11   3    4.96   16.90
  -6  -6  -3  -12.90   20.81
  -6  12  -3    4.50   15.36
  -6  12  -3   12.76   15.19
   6 -12   3  -14.34   15.92
 -12   6   3    5.73   13.90
 -12   6   3   -1.96   17.25
  -7  -6  -3   43.00   14.16
 -13   7   3   67.71   18.55
 -13   7   3   63.14   22.26
   6 -13   3   33.93   18.94
  -5  12  -3    3.49   13.27
 -12   7   3    8.13   14.54
   5 -12   3  -12.85   13.81
  -4  11  -3   -5.46   11.68
  -4  11  -3   14.34   12.60
  -7  -4  -3   -0.69   10.75
 -11   7   3    6.85   19.21
 -11   7   3    9.17   13.49
   4 -11   3   11.26   14.97
  -3  10  -3    0.18   13.81
  10  -7  -3   23.68   14.70
  -7  -3  -3   16.29    9.51
  -3  10  -3   -4.55   11.05
  10  -7  -3  -10.95   17.80
  -7  -3  -3   36.29   11.12
  -3  10  -3    2.53   10.93
  10  -7  -3   28.38   13.19
  -7  -3  -3   10.60   10.61
   3 -10   3   -7.82   10.40
   7   3   3   -5.53   10.71
   3 -10   3   14.30   14.48
   7   3   3   18.62   11.95
 -10   7   3    5.36   13.42
   3 -10   3   35.28   14.83
   7   3   3   15.75   10.21
 -10   7   3   32.37   17.91
 -10   7   3   -5.05    9.62
  -2   9  -3   32.88   13.52
  -7  -2  -3   17.70   11.32
  -2   9  -3   18.31   11.45
  -2   9  -3   24.09   10.01
   9  -7  -3    2.08   19.06
  -7  -2  -3   21.03    9.70
   9  -7  -3   13.93   11.40
   9  -7  -3   15.62   11.43
  -7  -2  -3    7.70    9.69
   2  -9   3   17.03   12.18
   2  -9   3   29.29   12.25
  -9   7   3   31.18   17.05
   7   2   3   31.19   11.38
  -9   7   3   -0.08   11.17
   2  -9   3   19.02    9.15
   7   2   3   10.84   11.70
  -9   7   3   16.12   14.06
   7   2   3   37.88   11.84
  -7  -1  -3    9.37    9.01
  -1   8  -3   -2.19    7.56
  -1   8  -3    4.88   10.70
   8  -7  -3    8.08   13.27
   8  -7  -3  -36.16   14.55
  -7  -1  -3    1.18   11.29
  -1   8  -3  -19.68    9.29
  -7  -1  -3   -5.03    8.45
   8  -7  -3    0.56   12.48
   1  -8   3    7.32   12.55
  -8   7   3  -23.46   15.09
   1  -8   3   -0.96    6.57
  -8   7   3   14.18   13.10
  -8   7   3    3.43   10.11
   7   1   3    8.71   10.76
   7   1   3  -18.91   12.90
   7   1   3   -1.86    8.25
   0   7  -3  486.28   35.36
  -7   0  -3  495.80   37.85
   7  -7  -3  455.27   42.01
  -7   0  -3  502.79   35.01
   7  -7  -3  470.51   37.49
  -7   0  -3  433.04   33.85
   0   7  -3  434.96   34.92
   7  -7  -3  472.29   37.79
   0   7  -3  480.05   30.72
   7   0   3  487.73   35.14
  -7   7   3  413.81   39.53
   0  -7   3  456.85   35.41
   7   0   3  462.25   34.54
   0  -7   3  508.00   36.10
  -7   7   3  489.63   38.64
   7   0   3  406.18   36.78
  -7   7   3  421.61   36.13
  -7   1  -3  408.98   31.04
  -7   1  -3  405.06   30.64
   1   6  -3  396.21   25.04
   6  -7  -3  401.15   33.91
   1   6  -3  365.36   29.82
  -7   1  -3  364.32   34.46
   6  -7  -3  347.32   32.20
   1   6  -3  377.66   29.62
   6  -7  -3  415.34   35.70
   7  -1   3  372.20   30.15
   7  -1   3  375.24   30.53
   7  -1   3  396.83   34.45
  -6   7   3  371.55   32.57
  -1  -6   3  404.57   30.27
  -6   7   3  431.01   34.51
  -6   7   3  381.30   34.32
  -1  -6   3  390.42   30.20
   2   5  -3 1246.52   75.65
   5  -7  -3 1324.34   81.99
   2   5  -3 1245.13   78.23
  -7   2  -3 1261.28   79.92
  -7   2  -3 1238.67   81.39
   5  -7  -3 1214.44   81.69
  -7   2  -3 1253.54   82.71
   2   5  -3 1240.13   75.63
   2   5  -3 1225.63   78.13
   5  -7  -3 1265.51   81.37
  -5   7   3 1237.40   81.30
   7  -2   3 1253.81   79.53
  -5   7   3 1247.69   81.16
  -5   7   3 1201.53   80.64
  -2  -5   3 1175.68   78.29
   7  -2   3 1306.65   82.45
  -2  -5   3 1256.90   78.05
   7  -2   3 1286.56   79.85
  -7   3  -3   34.15    9.69
   4  -7  -3   37.69   12.50
   3   4  -3   28.47    7.10
  -7   3  -3   28.88   10.98
   4  -7  -3   18.69   11.02
   4  -7  -3   37.60   11.57
   3   4  -3   31.23    7.76
   3   4  -3   54.87    9.20
   3   4  -3   45.87    8.54
  -4   7   3   33.62   11.87
   7  -3   3   19.40   15.27
   7  -3   3   19.52   10.87
  -4   7   3   25.89   12.55
  -3  -4   3   29.85    8.39
   7  -3   3   24.84    9.43
  -3  -4   3   22.34    7.89
  -4   7   3    8.15   11.91
   4   3  -3   45.33    8.57
   3  -7  -3   26.88   13.31
  -7   4  -3   43.21   12.06
   4   3  -3   42.25    9.25
  -7   4  -3   50.38   11.36
   3  -7  -3   53.26   14.66
  -7   4  -3   26.11   14.77
   4   3  -3   28.90    7.60
   3  -7  -3   20.69   11.08
   7  -4   3   28.57   10.91
  -4  -3   3   31.34    8.03
   7  -4   3   42.17   11.92
  -4  -3   3   37.22    7.75
  -3   7   3   26.48   12.54
  -3   7   3   56.25   14.67
   7  -4   3   35.17   15.38
  -3   7   3   20.43   10.24
   2  -7  -3 1305.71   80.86
  -7   5  -3 1244.02   80.04
   2  -7  -3 1226.40   80.22
   2  -7  -3 1211.67   77.11
  -7   5  -3 1212.79   80.32
   5   2  -3 1244.93   76.13
   5   2  -3 1254.50   76.05
  -7   5  -3 1250.40   83.23
   5   2  -3 1246.70   78.31
   7  -5   3 1180.79   80.05
   7  -5   3 1220.43   80.13
  -2   7   3 1298.25   77.14
  -5  -2   3 1219.21   78.00
  -5  -2   3 1259.70   76.13
  -2   7   3 1211.42   80.36
   7  -5   3 1185.30   82.29
   6   1  -3  376.97   27.13
   6   1  -3  423.97   32.48
   1  -7  -3  399.76   26.23
   1  -7  -3  359.00   32.17
   1  -7  -3  400.63   33.45
   6   1  -3  386.42   27.11
  -7   6  -3  397.83   37.55
  -7   6  -3  396.60   33.96
  -7   6  -3  396.79   33.13
   7  -6   3  402.62   36.84
  -1   7   3  361.55   32.30
  -6  -1   3  392.89   27.11
   7  -6   3  364.00   32.79
  -6  -1   3  429.65   32.36
  -1   7   3  397.78   33.38
   7  -6   3  427.02   33.75
  -6  -1   3  385.45   27.45
  -7   7  -3  425.63   41.74
   7   0  -3  445.37   38.03
   7   0  -3  465.94   32.07
   0  -7  -3  468.43   36.65
   0  -7  -3  485.51   36.93
  -7   7  -3  498.21   38.10
  -7   7  -3  482.38   38.54
   7   0  -3  441.94   31.66
  -7   0   3  489.71   32.49
  -7   0   3  468.48   31.67
   7  -7   3  443.09   40.19
   7  -7   3  473.51   38.11
   0   7   3  433.28   36.22
  -7   0   3  521.75   38.26
   7  -7   3  443.24   37.97
   0   7   3  447.64   36.47
   8  -1  -3   -1.00   14.99
  -7   8  -3    1.96   15.55
  -1  -7  -3   10.80   10.58
   8  -1  -3   -1.11    7.29
  -7   8  -3   -0.54   13.19
  -1  -7  -3    1.96    8.06
   8  -1  -3    6.53    8.39
  -7   8  -3   -4.26   12.69
   7  -8   3    1.09   12.16
   1   7   3    8.37    9.70
  -8   1   3   -3.42    7.59
  -8   1   3    1.45   13.37
   7  -8   3   -7.75   12.08
  -8   1   3   -1.52    8.42
   1   7   3    1.82    9.63
   7  -8   3    0.04   15.82
  -7   9  -3    6.64   12.55
  -7   9  -3   27.30   11.99
   9  -2  -3   18.99    9.36
   9  -2  -3   31.07   17.12
  -2  -7  -3   23.02   12.73
   9  -2  -3   41.63   10.73
  -2  -7  -3   17.06   12.13
  -7   9  -3   35.30   17.26
  -9   2   3   29.25   15.87
   7  -9   3   20.02   16.08
   7  -9   3   26.02   13.31
   2   7   3   25.29   12.22
  -9   2   3   20.25    9.83
  -9   2   3   38.76   10.55
   7  -9   3   34.29   16.22
   2   7   3   23.74   11.11
  -7  10  -3   14.91   16.56
  10  -3  -3  -25.08   16.89
  -3  -7  -3    1.77   11.78
  -3  -7  -3   10.21   10.20
  -7  10  -3    2.34   13.09
  -7  10  -3   13.49   12.15
  10  -3  -3    8.09   10.27
  10  -3  -3   17.84   10.32
   7 -10   3   12.23   16.50
   7 -10   3   19.68   15.31
 -10   3   3   17.54   16.47
   7 -10   3    5.44   14.35
 -10   3   3   24.67   10.76
   3   7   3   17.34   12.70
   3   7   3    4.47   13.09
 -10   3   3   25.22   10.75
  -4  -7  -3   -0.48   11.61
  -7  11  -3  -16.46   16.59
  -7  11  -3   -7.25   15.38
  -7  11  -3   -1.07   11.53
 -11   4   3   13.90   10.77
   7 -11   3   -0.63   18.63
   7 -11   3  -30.64   14.45
 -11   4   3  -12.80   15.39
 -11   4   3   -4.25   10.37
  -7  12  -3   27.66   16.74
 -12   5   3   -4.45   17.03
   7 -12   3    6.92   18.35
  -7  13  -3  101.27   19.57
  -6  -7  -3   42.76   15.61
 -13   6   3   55.78   16.10
 -13   6   3   29.88   20.68
   7 -13   3   30.61   20.70
  -7  -7  -3   -8.66   12.77
 -14   7   3   13.40   19.26
 -14   7   3   18.76   16.13
   7 -14   3  -40.28   17.62
  -8  -7  -3   20.19   15.13
 -15   8   3   62.25   24.85
   7 -15   3   16.70   20.21
 -15   8   3   19.28   16.36
  -8  -6  -3   -5.52   13.10
   6 -14   3   -9.37   19.72
 -14   8   3  -13.08   15.82
 -14   8   3   12.79   21.08
  -8  -5  -3  116.21   18.03
 -13   8   3  135.92   22.66
   5 -13   3  196.64   40.40
 -13   8   3  144.20   29.55
  -8  -4  -3    3.31   10.87
 -12   8   3    2.09   15.11
   4 -12   3    3.57   17.18
 -12   8   3   21.16   20.17
  -8  -3  -3  293.34   29.84
  -8  -3  -3  312.79   27.77
  -3  11  -3  346.55   27.43
  -8  -3  -3  298.83   26.18
 -11   8   3  286.99   30.23
 -11   8   3  306.28   36.04
   3 -11   3  214.47   27.10
  10  -8  -3  387.56   35.85
  -8  -2  -3  339.45   29.06
  -8  -2  -3  357.05   30.22
  -2  10  -3  352.08   32.32
  10  -8  -3  361.08   34.23
  -8  -2  -3  335.28   28.31
  -2  10  -3  358.40   26.55
  -2  10  -3  295.89   41.87
 -10   8   3  316.69   35.43
   8   2   3  249.43   29.96
   2 -10   3  352.08   33.93
 -10   8   3  369.63   36.67
  -8  -1  -3    9.94   10.46
  -1   9  -3   -9.29    6.63
   9  -8  -3   12.41   15.51
  -1   9  -3    2.89   11.71
   9  -8  -3   -1.11   11.25
  -1   9  -3   18.98   11.86
   9  -8  -3  -34.33   15.19
  -8  -1  -3   -5.77    9.92
  -9   8   3  -19.51   16.47
  -9   8   3   11.61   15.50
   8   1   3   -7.16    9.62
   1  -9   3  -12.55   13.41
   8   1   3    2.73   10.38
  -9   8   3   -2.29   13.97
   1  -9   3  -14.85   10.48
   8   1   3   -8.51   12.18
  -8   0  -3   35.23   13.92
   8  -8  -3   42.62   14.38
  -8   0  -3   34.97   11.48
   8  -8  -3   12.20   16.42
  -8   0  -3   41.27   10.80
   8  -8  -3   36.43   16.21
   0   8  -3   33.59   11.87
   0  -8   3   24.99   12.73
   0  -8   3   54.84   14.99
   8   0   3   32.01   14.57
  -8   8   3   24.00   17.26
   8   0   3   44.68   12.71
  -8   8   3   38.21   16.39
   8   0   3   37.82   10.89
  -8   8   3   25.33   14.18
   7  -8  -3   10.13   14.50
  -8   1  -3    3.23   10.70
   7  -8  -3    6.31    9.65
   1   7  -3    9.17    8.96
  -8   1  -3    1.49   13.13
   7  -8  -3  -16.57   11.78
   1   7  -3   -8.98    9.77
  -8   1  -3   -1.83    9.54
  -7   8   3  -12.38   13.95
  -1  -7   3   -9.72   10.23
   8  -1   3   -0.75   14.48
   8  -1   3   12.90    9.46
  -1  -7   3    4.20    9.75
  -7   8   3    1.53   13.19
  -7   8   3  -14.58   11.65
   8  -1   3   -4.10    9.47
  -8   2  -3  277.04   25.99
   2   6  -3  250.36   23.86
   6  -8  -3  307.77   29.73
   6  -8  -3  272.37   28.32
   2   6  -3  241.89   24.03
  -8   2  -3  213.49   27.02
   6  -8  -3  267.00   28.01
  -8   2  -3  272.26   25.29
  -2  -6   3  290.51   24.85
   8  -2   3  295.28   29.21
   8  -2   3  307.17   26.30
  -2  -6   3  283.18   24.10
  -6   8   3  339.66   30.98
  -6   8   3  301.43   30.43
   8  -2   3  301.38   26.17
  -6   8   3  300.21   28.86
   5  -8  -3    6.32   13.33
   3   5  -3   -0.97    8.32
  -8   3  -3   -6.65   11.02
   3   5  -3   12.54    8.58
  -8   3  -3   17.59   15.08
   5  -8  -3    8.13   11.83
   3   5  -3    7.75    5.53
   5  -8  -3  -16.05   11.96
   3   5  -3   -0.42    5.01
  -3  -5   3   -1.71    7.80
  -5   8   3   -9.58   10.19
  -5   8   3  -16.48   12.02
  -5   8   3   -6.74   11.67
   8  -3   3    0.07   10.54
   8  -3   3   -7.51   14.92
  -3  -5   3    1.18    8.30
   4   4  -3    9.26    7.19
   4  -8  -3   13.77   14.87
  -8   4  -3    1.10    8.46
  -8   4  -3   21.78   16.47
   4  -8  -3   19.47   12.19
   4   4  -3    6.02    7.61
  -8   4  -3   -5.66   10.79
   4   4  -3   -9.19    6.88
   4  -8  -3   -4.55    9.68
   4   4  -3    0.15    7.31
   8  -4   3   -1.92   10.12
  -4  -4   3    3.82    7.50
  -4   8   3  -13.30   11.68
   8  -4   3    5.14   10.97
   8  -4   3    6.34   15.80
  -4  -4   3   -1.20    7.31
  -4   8   3    6.41    9.80
  -4   8   3  -17.31   10.17
  -8   5  -3    9.92   15.93
  -8   5  -3    5.79   11.60
   3  -8  -3   -8.92    9.65
   3  -8  -3    9.16   10.60
   5   3  -3   -3.59    6.96
   3  -8  -3   -9.07   13.84
  -8   5  -3   14.19   10.93
   5   3  -3  -13.76    8.31
   5   3  -3   10.65    7.59
  -5  -3   3    0.74    6.90
  -3   8   3   -3.73    9.33
  -3   8   3    2.17   12.87
   8  -5   3    1.13   12.06
  -5  -3   3   11.79    7.23
   8  -5   3    2.12   11.48
   8  -5   3  -23.47   14.81
  -3   8   3  -11.64    9.33
  -8   6  -3  269.78   27.28
   6   2  -3  240.04   20.78
  -8   6  -3  265.45   29.80
   2  -8  -3  294.16   29.13
   2  -8  -3  265.65   22.22
   2  -8  -3  299.72   28.24
   6   2  -3  273.83   25.99
   6   2  -3  264.14   21.12
  -8   6  -3  275.16   28.55
  -6  -2   3  307.06   25.29
   8  -6   3  277.09   28.09
  -2   8   3  300.72   21.61
   8  -6   3  212.22   23.51
   8  -6   3  320.56   31.63
  -2   8   3  254.92   26.10
  -6  -2   3  254.28   20.79
  -6  -2   3  262.11   21.18
  -2   8   3  268.94   28.28
   7   1  -3   10.12   12.21
  -8   7  -3   -1.69   11.22
  -8   7  -3   18.72   13.23
   7   1  -3   -5.48    6.83
   1  -8  -3   20.53   12.35
  -8   7  -3  -10.80   16.91
   7   1  -3   -8.72    6.96
   1  -8  -3   -0.68   12.36
  -7  -1   3   -2.19    7.53
  -1   8   3    6.96   12.52
  -7  -1   3    3.60   11.73
  -7  -1   3    6.73    7.07
   8  -7   3  -14.09   11.08
   8  -7   3    8.80   14.03
   8  -7   3   -2.33   15.87
  -1   8   3    1.55   10.86
  -8   8  -3   21.35   15.07
  -8   8  -3   43.95   14.56
   8   0  -3   24.23   14.82
   0  -8  -3   30.29   11.83
   8   0  -3   19.19    8.76
   8   0  -3   46.14    9.34
   0  -8  -3   13.82   13.25
  -8   8  -3   18.00   17.36
   8  -8   3   31.17   14.88
  -8   0   3   21.31    9.14
  -8   0   3   21.11   13.45
  -8   0   3   50.51    9.17
   8  -8   3   15.10   14.94
   8  -8   3  -16.48   16.71
   0   8   3   17.44   12.23
   0   8   3   23.89   14.54
   9  -1  -3   -1.09    7.56
  -8   9  -3   -4.56   16.57
  -1  -8  -3    4.58   11.95
   9  -1  -3  -34.11   15.23
  -8   9  -3   13.63   16.98
   9  -1  -3    0.49    9.14
   1   8   3    8.70   11.18
  -9   1   3  -12.00    7.64
   8  -9   3    7.24   15.78
   8  -9   3  -61.28   25.27
  -9   1   3   21.93   14.62
   8  -9   3  -14.86   12.27
   1   8   3   18.04   11.40
  -9   1   3    3.35    8.90
  -8  10  -3  381.75   39.09
  10  -2  -3  341.86   36.05
  -2  -8  -3  326.96   31.99
  -8  10  -3  341.54   34.92
  -2  -8  -3  351.59   32.29
  -8  10  -3  443.03   43.11
 -10   2   3  373.26   29.17
 -10   2   3  334.75   36.49
   8 -10   3  308.55   35.57
   8 -10   3  414.79   37.80
   2   8   3  320.28   32.80
   8 -10   3  365.70   37.29
 -10   2   3  334.91   28.12
  -3  -8  -3  331.88   29.81
  -8  11  -3  307.71   33.21
  -8  11  -3  264.84   29.88
   8 -11   3  241.54   32.32
 -11   3   3  255.30   25.98
 -11   3   3  322.59   34.35
 -11   3   3  312.14   27.14
   8 -11   3  257.02   32.96
  -8  12  -3    1.99   16.35
  -4  -8  -3  -20.40   12.63
   8 -12   3  -19.92   16.78
 -12   4   3    4.82   17.35
 -12   4   3   -3.28   11.43
  -5  -8  -3  165.41   22.40
  -8  13  -3  108.25   23.89
   8 -13   3  190.97   29.89
 -13   5   3  157.57   21.32
 -13   5   3  173.04   29.06
  -6  -8  -3   11.19   14.38
 -14   6   3  -10.57   14.25
   8 -14   3    8.81   21.22
 -14   6   3   -9.14   18.66
  -7  -8  -3   23.84   15.64
 -15   7   3   32.79   16.50
 -15   7   3   -1.20   20.72
  -9  -6  -3   -2.61   14.61
 -15   9   3    4.57   17.97
   6 -15   3   -3.94   20.31
 -15   9   3   21.88   24.90
  -9  -5  -3  100.74   17.80
   5 -14   3   93.19   23.67
 -14   9   3   44.29   19.82
 -14   9   3  141.94   28.92
  -9  -4  -3    5.73   11.87
   4 -13   3    3.97   16.77
 -13   9   3   24.32   18.35
 -13   9   3  -26.11   17.97
  -9  -3  -3   50.23   13.57
 -12   9   3   32.47   19.49
   3 -12   3   45.51   17.58
 -12   9   3   58.54   23.60
  -9  -2  -3   45.46   13.58
  -9  -2  -3   20.27   12.09
   2 -11   3   31.48   15.45
 -11   9   3   11.76   15.20
 -11   9   3    7.73   19.67
  -9  -1  -3   13.21   13.29
  10  -9  -3   43.51   16.62
  -9  -1  -3    0.17   11.15
  -9  -1  -3   25.98   11.39
 -10   9   3   35.42   16.83
   9   1   3   -7.79   22.41
 -10   9   3   14.74   18.85
   1 -10   3   13.89   13.62
   0   9  -3  155.45   21.25
  -9   0  -3  166.11   18.86
   9  -9  -3  168.42   24.27
   9  -9  -3  167.65   21.29
   9  -9  -3  159.58   27.41
  -9   0  -3  160.74   21.59
  -9   0  -3  169.12   20.21
  -9   9   3  116.19   18.83
  -9   9   3  148.13   24.37
  -9   9   3  163.99   22.14
   9   0   3  169.19   23.31
   0  -9   3  152.27   19.02
   0  -9   3  185.41   20.51
   9   0   3  203.07   24.18
   8  -9  -3    4.51   14.28
  -9   1  -3   16.87   10.34
   1   8  -3   -4.08   10.19
   1   8  -3   -2.41    9.80
  -9   1  -3   20.20   14.95
   8  -9  -3  -14.54   16.79
  -9   1  -3   11.51   11.21
   8  -9  -3   -9.49   13.83
   9  -1   3    6.81   10.42
   9  -1   3  -13.35   14.98
  -8   9   3   28.29   16.47
  -8   9   3   12.45    9.92
  -1  -8   3   14.67   11.77
   9  -1   3   -4.64   10.14
  -8   9   3    7.95   15.57
  -1  -8   3    7.60   10.90
   7  -9  -3   15.64   16.78
   2   7  -3   31.37   10.93
  -9   2  -3   29.59   16.16
  -9   2  -3   36.60   11.58
   7  -9  -3   19.91   12.16
  -9   2  -3   12.83   11.95
   2   7  -3   31.77   10.79
   7  -9  -3   24.85   14.62
   9  -2   3   23.74   11.20
  -7   9   3   -0.15   14.28
  -2  -7   3   35.29   10.87
   9  -2   3   32.02   17.07
  -7   9   3   27.12   15.14
  -7   9   3   32.13   15.87
  -2  -7   3   46.64   12.34
  -9   3  -3   92.21   16.33
   3   6  -3   97.10   13.18
   6  -9  -3  104.03   18.92
   6  -9  -3  107.24   20.37
   3   6  -3  118.78   15.32
   6  -9  -3   55.98   15.32
  -9   3  -3   80.57   14.59
  -9   3  -3  101.79   20.89
  -6   9   3  135.37   19.93
   9  -3   3   77.10   20.35
  -3  -6   3   98.27   12.87
  -3  -6   3   83.12   13.66
   9  -3   3   71.32   15.52
   9  -3   3   70.16   15.25
  -6   9   3  109.36   18.16
  -6   9   3  133.30   20.25
   5  -9  -3  560.02   43.46
   4   5  -3  508.39   36.02
   5  -9  -3  499.68   41.47
  -9   4  -3  520.26   40.70
   5  -9  -3  522.18   41.21
   4   5  -3  534.92   33.34
   4   5  -3  495.49   35.76
   4   5  -3  521.43   33.18
  -9   4  -3  524.51   45.68
   9  -4   3  462.10   45.53
   9  -4   3  494.68   39.70
  -4  -5   3  519.52   36.06
  -4  -5   3  526.09   36.48
  -5   9   3  476.48   40.92
   9  -4   3  524.67   39.85
  -5   9   3  487.46   39.77
  -5   9   3  523.20   42.65
  -9   5  -3  466.88   39.39
   4  -9  -3  484.24   39.05
  -9   5  -3  493.39   40.82
   5   4  -3  513.13   35.71
   4  -9  -3  573.98   56.73
   5   4  -3  490.71   35.50
  -9   5  -3  541.59   45.70
   4  -9  -3  513.93   41.70
   5   4  -3  484.19   35.37
   9  -5   3  498.15   40.81
   9  -5   3  531.90   40.34
  -5  -4   3  554.12   35.78
  -5  -4   3  549.21   35.87
  -4   9   3  540.37   38.69
   9  -5   3  521.83   45.83
  -4   9   3  496.91   41.27
  -4   9   3  545.77   43.67
   6   3  -3   82.52   13.74
   3  -9  -3   76.47   12.82
   6   3  -3   92.24   11.46
   3  -9  -3   45.32   13.12
  -9   6  -3   92.75   20.29
  -9   6  -3   80.09   15.85
   3  -9  -3  110.19   19.81
   6   3  -3  110.30   14.04
  -9   6  -3  102.10   18.06
  -6  -3   3   83.45   10.72
   9  -6   3  105.48   17.11
  -3   9   3   98.76   13.05
  -3   9   3   73.34   17.25
  -6  -3   3   97.95   11.80
   9  -6   3   88.90   17.95
   9  -6   3   68.34   20.65
  -9   7  -3   42.10   16.33
  -9   7  -3   31.07   14.67
   7   2  -3   19.85    8.04
   2  -9  -3   51.15   14.90
  -9   7  -3   -1.79   17.30
   2  -9  -3   17.48    7.92
   2  -9  -3    8.62   12.70
   7   2  -3   24.18   12.31
   9  -7   3    6.56   10.78
  -7  -2   3   29.26    8.58
  -2   9   3   44.12   15.72
   9  -7   3    2.75   21.26
   9  -7   3   20.57   12.60
   8   1  -3   -0.68   13.55
   8   1  -3   11.88    8.21
   1  -9  -3   29.42   15.32
  -9   8  -3   -3.93   17.96
  -9   8  -3    5.30   11.77
   8   1  -3    1.13    8.22
   1  -9  -3   -5.35   13.00
  -9   8  -3   -3.66   13.11
  -8  -1   3    8.47    7.53
  -1   9   3    0.02   12.19
   9  -8   3   -4.00   16.97
  -1   9   3  -11.53   10.97
  -8  -1   3   15.21   12.04
  -8  -1   3   13.97    8.50
   9  -8   3    7.56   14.61
   9  -8   3  -21.45   13.17
   9   0  -3  180.28   16.00
   9   0  -3  167.67   23.64
   0  -9  -3  167.12   21.15
  -9   9  -3  161.30   23.85
  -9   9  -3  121.27   24.93
  -9   9  -3  125.60   20.62
   9   0  -3  155.51   16.12
   0  -9  -3  158.80   20.13
  -9   0   3  175.20   16.17
   0   9   3  170.70   23.66
   9  -9   3  157.76   23.82
   9  -9   3  140.70   26.78
   0   9   3  105.40   17.55
   9  -9   3  127.83   20.82
  -9   0   3  172.23   15.71
  -9   0   3  149.30   21.56
  -1  -9  -3    1.96   12.48
  -9  10  -3   15.60   14.78
  10  -1  -3    6.70   19.99
  -9  10  -3   28.45   19.16
 -10   1   3   13.55    8.60
   9 -10   3    9.63   14.85
 -10   1   3   15.53    9.88
 -10   1   3   33.32   16.61
   9 -10   3   47.04   18.20
   9 -10   3  -25.20   20.99
  -9  11  -3   16.61   16.99
  -9  11  -3   13.10   18.76
  -2  -9  -3   34.92   13.60
 -11   2   3   29.24   17.37
 -11   2   3   35.18   11.94
   9 -11   3   14.00   16.20
 -11   2   3   24.96   11.51
  -9  12  -3   26.12   15.29
  -3  -9  -3   36.98   15.51
  -9  12  -3   76.84   21.14
   9 -12   3   59.56   21.22
 -12   3   3   60.46   13.53
 -12   3   3   51.20   20.30
  -4  -9  -3  -24.19   12.42
  -9  13  -3    2.29   17.96
   9 -13   3  -14.68   20.23
 -13   4   3  -10.49   17.87
 -13   4   3    4.40   12.91
  -9  14  -3  118.50   29.05
  -5  -9  -3  119.03   21.41
 -14   5   3  102.49   18.89
 -14   5   3  111.78   26.05
  -6  -9  -3   10.05   17.16
 -15   6   3    0.61   16.34
 -15   6   3   48.72   22.88
 -15  10   3    3.21   18.93
 -15  10   3   61.72   47.07
   5 -15   3    9.19   23.49
 -10  -4  -3   23.35   14.12
   4 -14   3   10.43   17.27
 -14  10   3   65.24   25.89
 -14  10   3   66.56   21.73
 -10  -3  -3    6.45   12.69
   3 -13   3   36.09   20.02
 -13  10   3   40.82   22.74
 -13  10   3   16.88   17.40
 -10  -2  -3   92.45   15.98
 -12  10   3   63.08   24.47
   2 -12   3   60.13   21.16
 -12  10   3   41.03   27.30
 -10  -1  -3   91.28   18.24
 -10  -1  -3   71.85   15.89
 -11  10   3  109.95   24.69
 -11  10   3  113.21   28.59
   1 -11   3   80.80   18.54
 -10   0  -3   -4.15   11.69
  10 -10  -3    7.67   15.51
 -10   0  -3   14.20   14.10
 -10  10   3   -4.33   18.79
   0 -10   3   13.70   13.14
 -10  10   3   -5.02   16.06
   9 -10  -3   -7.50   20.37
   9 -10  -3   21.48   16.24
 -10   1  -3   23.17   11.48
 -10   1  -3   20.83   12.27
   9 -10  -3   60.70   19.46
 -10   1  -3   33.51   15.94
  -1  -9   3   31.68   12.53
  -9  10   3   26.49   18.18
  10  -1   3    1.90   17.88
  -9  10   3   53.32   19.41
  -1  -9   3   29.17   15.48
 -10   2  -3  340.44   29.58
   8 -10  -3  296.49   35.25
 -10   2  -3  312.95   33.98
   8 -10  -3  395.33   37.39
 -10   2  -3  340.95   30.96
   8 -10  -3  364.14   35.40
  -8  10   3  280.74   32.11
  -8  10   3  282.29   35.20
  -2  -8   3  327.07   29.67
  -2  -8   3  339.01   28.85
  -8  10   3  305.33   34.53
   7 -10  -3   25.53   15.67
   3   7  -3   14.41   10.64
 -10   3  -3   35.41   17.17
   7 -10  -3  -29.70   15.86
   7 -10  -3   30.85   17.63
   3   7  -3   13.59   10.75
 -10   3  -3   19.72   13.28
 -10   3  -3   10.80   11.14
  -3  -7   3   23.75   10.17
  -7  10   3   10.19   15.64
  10  -3   3    5.87   10.86
  10  -3   3  -16.67   17.23
  -3  -7   3   16.73   10.99
  10  -3   3   19.94   13.30
  -7  10   3   31.24   19.67
  -7  10   3    7.99   11.41
 -10   4  -3   53.00   14.95
   6 -10  -3   26.27   16.49
   4   6  -3   68.15   12.03
 -10   4  -3   68.27   14.85
   4   6  -3   50.10   11.60
 -10   4  -3   70.98   19.62
   6 -10  -3   57.06   18.29
  -4  -6   3   46.56   12.15
  -6  10   3   23.12   15.82
  -6  10   3   48.23   19.39
  10  -4   3   58.89   21.16
  -6  10   3   57.38   16.02
  10  -4   3   42.49   14.52
  10  -4   3   63.35   15.05
  -4  -6   3   53.29   11.41
 -10   5  -3   -7.93   10.19
 -10   5  -3    0.85   12.71
   5 -10  -3   -1.92   15.14
   5 -10  -3  -10.75   12.70
   5   5  -3   -9.81    8.16
   5 -10  -3   -4.18   12.81
   5   5  -3    5.43    6.67
 -10   5  -3   -8.17   17.49
   5   5  -3  -25.69    6.93
  -5  10   3    5.35   14.19
  -5  10   3   27.44   17.61
  10  -5   3    4.58   12.88
  -5  -5   3  -11.51    7.68
  10  -5   3  -32.97   17.67
  -5  -5   3  -16.52    8.53
  10  -5   3   10.50   12.57
   6   4  -3   64.63   10.96
   4 -10  -3   38.59   15.28
 -10   6  -3   34.38   13.33
 -10   6  -3   85.31   21.71
   6   4  -3   40.51   11.11
 -10   6  -3   65.91   16.72
   4 -10  -3   29.86   13.86
   6   4  -3   50.24   10.52
   4 -10  -3   27.56   13.46
  -4  10   3   45.08   15.22
  -4  10   3   41.98   12.28
  -6  -4   3   44.85   10.39
  10  -6   3   30.32   20.83
  -4  10   3   29.19   17.11
  10  -6   3   42.46   15.37
  -6  -4   3   52.04    9.94
   3 -10  -3   33.13   15.29
 -10   7  -3   14.58   18.37
   7   3  -3    6.35    8.69
   3 -10  -3   13.45    9.86
   3 -10  -3   25.87   14.83
   7   3  -3    3.32   12.48
   7   3  -3   22.49    8.46
 -10   7  -3   29.82   13.43
 -10   7  -3   -8.29   13.77
  -3  10   3   29.55    9.60
  -3  10   3    9.99   12.34
  10  -7   3   -1.21   18.88
  -3  10   3   54.97   16.78
  -7  -3   3   -8.31   10.22
  10  -7   3    1.76   11.57
  10  -7   3   23.27   16.85
  -7  -3   3    8.92    8.20
   8   2  -3  372.15   26.56
 -10   8  -3  319.48   33.48
   8   2  -3  324.39   32.73
   2 -10  -3  397.03   36.75
   8   2  -3  342.48   28.64
 -10   8  -3  322.73   36.73
  -8  -2   3  364.75   27.03
  10  -8   3  332.19   35.17
  -2  10   3  361.85   34.57
  -2  10   3  345.33   35.05
  10  -8   3  402.82   36.60
 -10   9  -3    6.70   14.62
 -10   9  -3   13.65   19.61
   1 -10  -3   55.42   17.16
   9   1  -3  -14.24   15.13
  10  -9   3   33.06   16.22
  -9  -1   3   33.65    9.58
  10  -9   3   22.08   16.98
  -1  10   3    8.05   13.16
  -9  -1   3   22.57    9.30
  -9  -1   3   12.75   13.71
 -10  10  -3   12.57   13.61
 -10  10  -3    7.01   19.47
   0 -10  -3    8.12   13.55
 -10   0   3    7.84    8.31
 -10   0   3   -7.34    8.76
  10 -10   3   12.78   16.58
 -10   0   3   14.57   15.31
  -1 -10  -3   51.06   15.83
 -10  11  -3   46.67   21.77
 -10  11  -3   52.91   24.94
 -11   1   3   74.20   19.47
 -11   1   3   66.38   11.87
 -10  12  -3   51.46   37.66
  -2 -10  -3   62.94   18.93
 -10  12  -3   -1.89   15.13
 -12   2   3   53.42   13.17
 -12   2   3   75.92   21.19
 -10  13  -3   29.56   20.28
  -3 -10  -3   12.51   15.08
 -13   3   3    5.21   18.08
 -13   3   3   11.61   12.13
  -4 -10  -3    0.16   16.13
 -10  14  -3   19.54   19.55
 -14   4   3   23.91   21.29
 -14   4   3   35.84   14.22
  -5 -10  -3   -4.77   24.12
 -15   5   3    1.23   22.42
 -15   5   3   32.37   22.60
 -11  -4  -3   10.66   13.81
 -15  11   3  -27.98   26.21
   4 -15   3   12.35   26.44
 -15  11   3   54.31   28.48
 -11  -3  -3   10.99   13.37
 -14  11   3   -2.08   18.17
 -14  11   3   21.77   25.69
   3 -14   3  -14.23   16.81
 -11  -2  -3  -22.97   11.79
 -13  11   3  -10.51   21.70
 -13  11   3  -32.09   20.07
   2 -13   3  -16.92   14.79
 -11  -1  -3   73.04   15.92
 -12  11   3   86.29   25.10
   1 -12   3   60.21   17.84
 -12  11   3  144.92   29.12
 -11   0  -3   12.94   12.61
 -11   0  -3   54.46   16.77
 -11  11   3   40.84   22.41
 -11  11   3   24.31   16.69
   0 -11   3   21.99   15.00
 -11   1  -3   61.14   16.29
 -11   1  -3   68.56   18.61
  -1 -10   3   81.86   18.71
 -10  11   3   50.73   21.50
 -10  11   3   51.81   22.02
   9 -11  -3   21.99   18.65
 -11   2  -3   59.11   14.63
 -11   2  -3   44.76   18.29
  -2  -9   3   38.96   13.02
  11  -2   3   25.85   21.69
  -9  11   3   64.51   19.71
  -9  11   3   69.09   25.71
   8 -11  -3  244.06   32.81
 -11   3  -3  314.14   30.50
 -11   3  -3  363.29   36.59
   8 -11  -3  271.68   34.00
  -8  11   3  288.61   32.10
  -3  -8   3  297.12   27.24
  -8  11   3  280.23   33.91
  -3  -8   3  320.94   30.05
 -11   4  -3  -24.82   16.56
   7 -11  -3   18.63   16.63
 -11   4  -3    7.17   13.70
  -7  11   3    4.94   14.34
  -4  -7   3   -8.83    9.69
  -4  -7   3    8.94   11.44
  -7  11   3  -11.32   14.64
   6 -11  -3   10.20   18.46
 -11   5  -3   20.08   14.92
 -11   5  -3   11.28   17.73
   6 -11  -3  -31.24   14.07
  -6  11   3   16.75   13.64
  -5  -6   3   27.09   11.97
  -6  11   3  -21.29   14.16
  -5  -6   3   19.64    9.73
   5 -11  -3    1.48   16.09
 -11   6  -3   29.96   19.67
 -11   6  -3   48.31   17.21
  -6  -5   3   16.46    9.28
  -5  11   3   31.95   19.43
  -5  11   3   10.84   12.81
  -6  -5   3    3.61   12.11
  -5  11   3    7.35   15.93
   4 -11  -3   -7.94   14.09
 -11   7  -3  -14.83   14.05
 -11   7  -3    1.65   17.79
  -4  11   3  -32.85   16.87
  -7  -4   3   -2.08    9.22
  11  -7   3   20.61   15.93
  -4  11   3    4.64   10.09
  -7  -4   3  -18.57    7.75
 -11   8  -3  339.91   33.13
   3 -11  -3  371.97   35.99
 -11   8  -3  323.05   35.21
  -3  11   3  225.08   27.93
  -8  -3   3  284.73   23.74
  -8  -3   3  340.98   26.00
  11  -8   3  215.11   26.93
 -11   9  -3   40.57   21.30
   2 -11  -3   43.41   17.69
 -11   9  -3   56.56   22.25
  11  -9   3   26.61   16.73
  -9  -2   3   38.92   10.13
   1 -11  -3   83.27   22.05
 -11  10  -3   71.79   18.62
 -11  10  -3   66.90   32.71
 -10  -1   3   99.65   18.94
 -10  -1   3   78.25   11.82
 -10  -1   3   54.94   12.06
   0 -11  -3   52.93   20.08
 -11  11  -3   45.90   21.55
 -11  11  -3   34.43   15.95
 -11   0   3   38.08   10.58
 -11   0   3   36.79   11.23
 -11   0   3   46.96   17.43
 -11  12  -3   97.24   24.80
 -11  12  -3   30.80   18.68
  -1 -11  -3   86.00   18.09
 -12   1   3   66.59   20.38
 -12   1   3   87.65   14.02
 -11  13  -3    1.97   18.27
  -2 -11  -3   -2.16   15.33
 -13   2   3   21.04   19.39
 -13   2   3    9.19   11.35
  -3 -11  -3  -22.95   14.74
 -11  14  -3   31.72   22.19
 -14   3   3    3.06   20.11
 -14   3   3  -15.93   11.50
  -4 -11  -3  -27.84   15.26
 -15   4   3   14.40   13.99
 -15   4   3   31.37   21.23
 -12  -2  -3   -7.52   16.15
   2 -14   3   33.34   20.99
 -14  12   3    7.36   21.52
 -14  12   3   29.80   27.41
 -12  -1  -3  -12.75   13.16
 -13  12   3   31.89   24.12
   1 -13   3   25.82   18.35
 -13  12   3    4.63   25.03
 -12   0  -3   11.30   13.82
 -12  12   3  -13.55   20.86
   0 -12   3   18.32   15.43
 -12  12   3    8.33   25.36
 -12   1  -3   83.62   17.63
 -12   1  -3  106.68   21.21
 -11  12   3   90.74   27.57
 -11  12   3   81.01   25.56
  -1 -11   3   56.06   16.82
 -12   2  -3   73.41   20.21
 -12   2  -3   41.64   14.80
 -10  12   3   99.75   26.78
  -2 -10   3   52.26   14.58
 -10  12   3   42.57   21.42
 -12   3  -3   37.03   19.73
 -12   3  -3   46.39   15.07
  -9  12   3   67.22   20.96
  -9  12   3   92.82   27.61
  -3  -9   3   47.64   13.18
   8 -12  -3  -11.76   17.44
 -12   4  -3   23.33   24.61
 -12   4  -3   -4.98   16.46
  -4  -8   3   20.89   11.43
  -8  12   3    9.88   16.00
  -8  12   3   14.01   24.99
 -12   5  -3   -8.84   17.02
 -12   5  -3  -12.74   14.00
   7 -12  -3   18.96   16.63
  -7  12   3  -11.88   21.71
  -5  -7   3  -17.31   11.59
  -7  12   3   -6.10   13.98
  -5  -7   3    2.31   18.59
   6 -12  -3    9.20   16.77
 -12   6  -3   -0.61   18.19
 -12   6  -3    1.44   14.80
  -6  -6   3  -27.91   11.03
  -6  12   3    3.76   18.73
  -6  12   3    3.72   13.56
  -6  -6   3    3.60    9.36
   5 -12  -3   -4.88   19.38
 -12   7  -3    2.61   36.77
 -12   7  -3   -8.17   15.55
  -7  -5   3    8.40    9.05
  -7  -5   3  -13.00   10.47
 -12   8  -3   12.07   19.20
 -12   8  -3   15.43   20.44
   4 -12  -3  -14.95   14.40
  -8  -4   3   -0.29    9.96
  -8  -4   3    5.09    8.93
 -12   9  -3   38.75   20.12
 -12   9  -3   52.74   22.06
   3 -12  -3   64.02   21.41
  -9  -3   3   41.39   11.79
  -9  -3   3   46.27   11.68
 -12  10  -3   68.03   23.36
 -12  10  -3   31.30   17.32
   2 -12  -3   30.79   33.33
 -10  -2   3   56.34   10.77
 -12  11  -3  124.69   30.64
   1 -12  -3   89.50   23.25
 -12  11  -3  106.81   26.45
 -12  12  -3   57.19   23.36
   0 -12  -3    6.66   15.95
 -12  12  -3    6.21   20.03
 -12   0   3   -4.21   19.58
  -1 -12  -3  -11.25   17.41
 -12  13  -3    9.33   19.62
 -13   1   3   10.75   25.47
 -13   1   3    2.01   10.88
  -2 -12  -3  -15.55   17.18
 -12  14  -3   74.08   22.29
 -14   2   3    7.43   12.25
 -13  -1  -3   -6.68   14.85
 -14  13   3   -0.41   22.88
 -14  13   3   65.17   29.86
   1 -14   3    1.67   18.59
 -13   0  -3  -13.39   13.74
 -13  13   3   61.87   26.35
   0 -13   3   18.37   17.42
 -13  13   3   -3.97   26.13
 -13   1  -3  -21.02   13.67
 -12  13   3   26.91   24.59
 -12  13   3   -7.46   18.34
  -1 -12   3   -4.12   14.86
 -13   2  -3   18.43   17.92
 -13   2  -3   -1.51   13.98
 -11  13   3    7.68   33.56
 -11  13   3   23.22   22.03
  -2 -11   3  -14.35   12.87
 -13   3  -3   21.04   15.52
 -13   3  -3   34.93   19.92
 -10  13   3   45.71   29.16
  -3 -10   3   18.06   13.59
 -10  13   3   25.12   19.33
 -13   4  -3   14.37   14.74
 -13   4  -3   17.99   19.26
  -4  -9   3    0.95   11.64
  -9  13   3  -11.46   17.58
 -13   5  -3  137.81   26.32
 -13   5  -3  112.96   20.74
  -8  13   3  181.81   25.31
  -5  -8   3  130.95   17.42
 -13   6  -3   50.64   17.83
   7 -13  -3   57.84   22.56
 -13   6  -3   51.57   22.87
  -6  -7   3   48.39   12.70
 -13   7  -3   52.93   23.54
   6 -13  -3    9.86   18.07
 -13   7  -3   53.03   19.55
  -7  -6   3   57.89   11.75
 -13   8  -3   97.96   23.43
   5 -13  -3  178.43   30.41
 -13   8  -3  161.79   28.92
  -8  -5   3  155.02   16.14
  -8  -5   3  181.66   18.57
 -13   9  -3   15.16   18.69
 -13   9  -3   16.21   21.91
 -13  10  -3   33.26   22.69
   3 -13  -3   13.20   17.83
 -13  10  -3   -7.25   17.36
 -13  11  -3   31.43   22.27
   2 -13  -3   -7.86   16.98
 -13  11  -3  -11.67   16.60
   1 -13  -3   11.61   17.49
 -13  12  -3   13.75   18.27
 -13  12  -3   49.05   23.67
   0 -13  -3   -1.76   17.82
 -13  13  -3   14.66   20.93
  -1 -13  -3    4.64   20.54
 -13  14  -3   14.98   26.81
 -14   1  -3  -25.72   15.14
 -13  14   3   56.88   32.97
  -1 -13   3    3.97   16.89
 -14   2  -3   -0.80   20.46
  -2 -12   3   52.50   32.83
 -12  14   3   87.32   27.61
 -14   3  -3   27.24   18.82
 -14   3  -3   -6.64   15.26
  -3 -11   3  -14.29   14.52
 -11  14   3   38.46   23.59
 -14   4  -3   33.09   16.66
 -14   4  -3   59.15   21.56
 -10  14   3   60.26   22.80
  -4 -10   3   28.80   14.44
 -14   5  -3  110.79   26.49
 -14   5  -3   90.65   19.92
  -5  -9   3   94.98   16.35
 -14   6  -3   71.29   22.81
 -14   6  -3   -8.68   15.65
  -6  -8   3    0.21   10.96
 -14   7  -3    7.94   16.93
 -14   7  -3   42.81   21.85
  -7  -7   3    8.17   10.31
 -14   8  -3   10.47   20.19
   6 -14  -3   11.61   20.25
 -14   8  -3  -15.84   17.53
 -14   9  -3  110.78   26.76
 -14   9  -3  114.33   27.25
   5 -14  -3   94.12   26.69
 -14  10  -3    9.85   19.00
 -14  10  -3   31.12   21.65
   4 -14  -3  -12.06   18.53
 -14  11  -3   35.98   22.53
   3 -14  -3  -15.56   18.34
 -14  11  -3   -9.02   22.18
 -14  12  -3  -14.18   18.09
 -14  12  -3    6.89   21.94
   2 -14  -3  -28.71   16.76
   1 -14  -3   -2.82   22.87
 -14  13  -3   35.16   23.13
 -15   4  -3  -12.58   14.24
 -15   4  -3   12.81   19.96
  -4 -11   3    0.58   14.72
 -15   5  -3   35.15   21.81
 -15   6  -3   14.75   21.50
 -15   6  -3  -16.26   15.36
  -6  -9   3   -4.77   11.58
 -15   7  -3   21.82   18.15
 -15   7  -3   31.10   22.89
  -7  -8   3    2.44   11.15
 -15   8  -3   19.03   19.43
 -15   8  -3   32.34   22.21
 -15   9  -3   -9.63   18.24
 -15   9  -3   77.36   25.10
   5 -15  -3    7.32   20.69
 -15  10  -3    2.08   22.06
 -15  11  -3   28.98   23.75
 -15  11  -3  -10.25   24.08
   4 -15  -3  -27.11   18.95
   0   0  -4  413.48   27.23
   0   0  -4  481.51   28.61
   0   0  -4  427.28   27.91
   0   0   4  434.90   28.08
   0   0   4  399.23   27.34
   1  -1  -4   86.85    8.37
  -1   0  -4   84.04    9.54
  -1   0  -4   64.37    8.37
   0   1  -4  104.20    9.82
   0   1  -4  104.11    9.03
   1  -1  -4  107.22   10.68
   0   1  -4   81.24    7.58
  -1   0  -4   84.13    9.04
   1   0   4   95.54    9.17
   1   0   4   69.32    8.35
  -1   1   4   76.84    8.22
   0  -1   4   74.54    7.66
   0  -1   4   80.24    8.89
   0  -1   4   98.12    9.49
   0  -1  -4  102.11    9.43
   1   0  -4  103.64    8.05
  -1   1  -4   83.12   10.55
  -1   1  -4   82.91    8.51
   1   0  -4   92.85    7.92
   0  -1  -4  103.48    9.51
   0  -1  -4   90.71    9.42
   1  -1   4  111.20   11.50
  -1   0   4   91.31    8.22
   0   1   4   86.43    9.50
   0   1   4  121.78   11.67
  -1   0   4   99.65    8.25
   1  -1   4   65.71    8.42
   1  -1   4   74.63    8.52
   2  -1  -4    4.30    5.69
   2  -1  -4    2.82    8.69
  -1  -1  -4    6.11    7.06
  -1  -1  -4   -2.17    5.82
  -1   2  -4   -0.34    8.56
  -1  -1  -4    2.40    6.95
  -1   2  -4    4.55    6.90
  -1   2  -4  -11.91    7.11
   2  -1  -4    1.96    5.62
   1   1   4    9.96    5.95
  -2   1   4    8.84    5.88
   1  -2   4    3.54    7.86
   1  -2   4    2.56    7.45
   1   1   4   -7.83    7.38
  -2   1   4    2.96    6.00
   1   1   4   -5.01    7.86
  -2   1   4   -2.73    8.22
   3  -2  -4  779.58   48.54
  -2  -1  -4  797.71   48.65
  -1   3  -4  790.84   50.47
  -2  -1  -4  742.19   49.15
  -1   3  -4  785.03   49.47
   3  -2  -4  794.18   48.53
   3  -2  -4  778.74   50.95
  -1   3  -4  723.00   49.01
   2   1   4  782.48   49.30
   1  -3   4  754.03   49.23
   1  -3   4  773.07   49.24
   2   1   4  743.03   49.27
  -3   2   4  779.71   48.67
  -3   2   4  745.28   50.62
  -3   2   4  759.09   48.61
   2   1   4  761.82   48.36
   0   2  -4    7.18    5.48
   2  -2  -4   -0.21    9.01
   2  -2  -4    3.97    6.59
   0   2  -4    6.64    6.41
   0   2  -4    5.13    7.75
  -2   0  -4   -3.10    8.23
  -2   0  -4   -2.51    6.74
  -2   0  -4   13.93    7.78
   2  -2  -4    1.98    7.92
   2   0   4   -7.53    7.02
   2   0   4    2.98    7.54
  -2   2   4    4.72    7.19
   0  -2   4    6.08    6.34
   0  -2   4   22.97    6.96
  -2   2   4   -8.72    8.32
   2   0   4   -6.51    7.64
   0  -2   4    1.65    6.24
   1  -2  -4  -13.59    6.66
  -2   1  -4    9.10    7.30
   1  -2  -4   14.65    8.20
  -2   1  -4   -1.99    8.84
   1  -2  -4    2.03    6.95
  -2   1  -4   20.93    7.73
   2  -1   4    4.94    8.50
   2  -1   4   10.97    6.22
  -1   2   4   -1.67    7.20
   2  -1   4    2.50    9.17
   0  -2  -4    4.56    7.90
  -2   2  -4    1.37    7.25
   0  -2  -4   -5.05    7.88
  -2   2  -4    2.84    7.05
   2   0  -4   -0.99    8.11
  -2   2  -4    1.75    9.44
   2  -2   4   20.81   10.65
   2  -2   4   -6.61    6.52
   0   2   4    7.19    8.36
   2  -2   4   -0.52    7.89
   0   2   4  -10.01    8.12
   3  -1  -4  788.93   50.37
  -2   3  -4  784.25   49.25
  -1  -2  -4  750.12   47.02
   3  -1  -4  768.11   47.08
  -2   3  -4  718.08   49.01
  -2   3  -4  748.52   49.80
   3  -1  -4  779.28   47.15
  -1  -2  -4  730.11   49.02
  -1  -2  -4  780.00   49.05
  -3   1   4  788.93   50.35
  -3   1   4  811.48   47.29
   1   2   4  754.61   48.91
   2  -3   4  755.46   49.49
  -3   1   4  750.36   47.07
   1   2   4  757.09   46.87
   2  -3   4  731.64   49.82
   1   2   4  729.69   48.79
   2  -3   4  751.25   49.10
  -2  -2  -4   46.74    8.80
  -2   4  -4   50.62   10.58
   4  -2  -4   24.17    8.33
  -2   4  -4   35.95   10.24
  -2  -2  -4   44.81    9.62
   4  -2  -4   61.95    9.35
  -2  -2  -4   38.68    7.26
   4  -2  -4   31.88   11.31
   2   2   4   52.98   10.14
   2   2   4   45.15    6.60
  -4   2   4   38.76    8.47
   2  -4   4   39.45    9.08
   2  -4   4   55.39   10.66
   2   2   4   44.18    8.56
   2  -4   4   37.59    9.41
  -4   2   4   44.87    8.35
  -4   2   4   49.72   13.22
  -2   5  -4  209.31   20.75
  -2   5  -4  240.66   21.20
   5  -3  -4  218.78   19.63
  -2   5  -4  248.43   21.81
  -3  -2  -4  223.35   20.28
   5  -3  -4  239.18   19.70
   5  -3  -4  219.54   24.18
  -3  -2  -4  222.94   18.52
  -5   3   4  194.24   19.67
   2  -5   4  195.29   20.74
   3   2   4  234.19   20.25
  -5   3   4  193.21   21.22
   2  -5   4  236.05   22.03
   2  -5   4  196.26   20.29
  -5   3   4  263.26   19.89
   3   2   4  228.59   17.74
   3   2   4  237.67   20.45
  -1   4  -4  100.87   11.60
  -3  -1  -4   99.60   12.42
  -3  -1  -4  117.59   11.92
  -1   4  -4   66.79   10.52
   4  -3  -4  107.42   14.78
   4  -3  -4  100.19   11.39
   4  -3  -4   98.40   11.37
  -4   3   4   91.05   13.67
   3   1   4   63.34   10.37
   3   1   4   98.33   11.63
   1  -4   4   91.59   11.45
   3   1   4  100.93   10.94
   1  -4   4   95.53   11.79
  -4   3   4   68.96   11.46
   0   3  -4   33.85    8.06
  -3   0  -4   50.25    9.43
  -3   0  -4   71.53   10.91
   0   3  -4   33.61    7.69
  -3   0  -4   46.94   10.50
   3  -3  -4   54.90    9.78
   3  -3  -4   34.57    8.81
   3  -3  -4   47.29   11.98
   0   3  -4   54.01    8.11
   3   0   4   32.67    8.60
   3   0   4   43.72   10.21
   0  -3   4   28.34    7.66
   0  -3   4   51.64    8.21
  -3   3   4   30.60   12.25
   0  -3   4   32.34    7.41
  -3   3   4   56.43   10.38
   3   0   4   49.26    8.85
  -3   3   4   50.74    8.72
  -3   1  -4  772.68   48.81
   2  -3  -4  738.65   48.98
   1   2  -4  792.76   46.46
   2  -3  -4  798.33   48.96
   2  -3  -4  738.72   49.13
   1   2  -4  780.88   47.90
  -3   1  -4  759.69   48.80
   1   2  -4  772.28   46.40
  -3   1  -4  727.73   49.64
  -2   3   4  760.81   49.13
  -1  -2   4  740.94   46.57
   3  -1   4  734.48   48.74
  -2   3   4  757.55   48.70
  -2   3   4  750.39   49.01
   3  -1   4  749.61   48.87
  -1  -2   4  737.43   46.49
   3  -1   4  715.57   49.42
  -3   2  -4  758.63   49.57
   2   1  -4  798.10   49.00
  -3   2  -4  755.29   49.42
   1  -3  -4  739.65   48.36
   1  -3  -4  748.54   49.35
  -3   2  -4  772.14   50.85
   3  -2   4  737.83   49.17
   3  -2   4  813.33   49.73
   3  -2   4  735.41   50.47
  -1   3   4  755.24   49.61
  -1   3   4  777.67   48.27
  -3   3  -4   34.76   10.04
  -3   3  -4   44.09   10.71
   0  -3  -4   41.21    6.70
   0  -3  -4   36.58    9.48
   0  -3  -4   40.85    8.56
  -3   3  -4   38.93   11.39
   0   3   4   52.00    9.78
   3  -3   4   33.00    9.97
   3  -3   4   42.67   10.58
   0   3   4   65.19   10.65
   3  -3   4   55.41   12.02
  -3   4  -4  101.43   12.25
   4  -1  -4  107.77    9.35
  -1  -3  -4   97.17    9.05
  -3   4  -4   93.00   14.05
  -1  -3  -4   99.31   13.19
  -3   4  -4   71.23   11.15
   4  -1  -4   93.40   13.26
   4  -1  -4   89.40    8.83
   1   3   4   73.96   10.49
   3  -4   4   82.73   13.22
  -4   1   4   90.09    9.06
   1   3   4   97.39   11.94
  -4   1   4   78.12   13.51
   3  -4   4   72.72   11.25
   3  -4   4   58.31   11.03
  -4   1   4   91.44    9.01
   5  -2  -4  222.89   18.15
  -2  -3  -4  211.20   20.46
  -3   5  -4  224.98   21.16
   5  -2  -4  213.70   23.72
  -2  -3  -4  205.79   15.70
   5  -2  -4  188.15   17.86
  -3   5  -4  208.52   23.07
  -3   5  -4  233.80   21.46
  -2  -3  -4  227.32   19.18
   3  -5   4  222.37   22.13
   3  -5   4  220.32   21.56
  -5   2   4  226.87   18.36
  -5   2   4  259.09   18.68
   2   3   4  228.26   20.65
   3  -5   4  206.78   21.83
  -5   2   4  230.10   23.69
   2   3   4  218.65   20.40
   2   3   4  216.53   15.15
  -3   6  -4   34.21   11.78
  -3   6  -4   27.99   11.42
   6  -3  -4   30.42    9.19
  -3   6  -4   37.02   12.16
   6  -3  -4   56.84   13.57
   6  -3  -4   38.03    9.70
  -3  -3  -4   32.39    9.77
  -3  -3  -4   38.85    6.97
   3  -6   4   22.26   10.64
  -6   3   4   30.96    9.44
   3  -6   4   58.97   11.90
   3  -6   4   32.69   11.13
  -6   3   4   24.62    8.58
   3   3   4   45.31    6.48
  -6   3   4   48.93   14.42
   3   3   4   36.11   10.11
   7  -4  -4   33.89   13.62
  -3   7  -4   19.44    9.37
  -3   7  -4   27.59    9.39
  -4  -3  -4   33.06   10.17
  -4  -3  -4   39.93    9.98
   7  -4  -4   53.57   12.05
  -4  -3  -4   33.19    8.03
  -3   7  -4   26.02   12.25
   7  -4  -4   41.12   11.22
   4   3   4   34.89    9.33
   4   3   4   16.25    9.55
   3  -7   4   32.38   11.18
   4   3   4   42.51    7.71
  -7   4   4   43.98   11.16
   3  -7   4   35.00   12.35
   3  -7   4   38.83   11.55
  -7   4   4   74.19   18.05
  -7   4   4   28.62   10.10
  -2   6  -4    1.53    7.65
   6  -4  -4   -2.55    7.96
   6  -4  -4  -11.35   11.16
  -4  -2  -4    6.61    8.91
  -2   6  -4    1.87   10.06
  -4  -2  -4    4.17    7.91
   6  -4  -4   11.74    9.10
  -4  -2  -4    8.21    8.13
   2  -6   4   -7.83    7.96
  -6   4   4   20.64   13.52
   4   2   4   -5.30    7.46
   2  -6   4    3.14   10.01
   4   2   4    0.54    7.28
  -6   4   4   -3.42    8.29
   4   2   4    1.86    7.80
  -6   4   4   10.26    8.86
   2  -6   4    8.18    9.24
  -4  -1  -4   -0.94    8.42
  -4  -1  -4    2.43    8.74
  -1   5  -4    7.56    8.39
   5  -4  -4   -9.63    6.59
   5  -4  -4   -5.73   11.07
   5  -4  -4    6.96    8.10
  -1   5  -4   24.42    8.36
  -1   5  -4    3.06    8.20
   4   1   4   10.97    8.26
  -5   4   4   -5.90   11.56
  -5   4   4    5.87    8.95
   4   1   4    7.07    8.16
   1  -5   4   -0.73    9.04
   1  -5   4    5.44    7.26
   4  -4  -4  537.03   38.72
  -4   0  -4  555.48   37.64
   0   4  -4  529.06   35.22
   4  -4  -4  544.63   37.05
  -4   0  -4  527.72   36.53
   4  -4  -4  536.54   36.69
   0   4  -4  522.13   35.32
   0   4  -4  508.73   34.68
  -4   4   4  533.73   37.02
   0  -4   4  528.40   35.58
  -4   4   4  534.41   36.64
   4   0   4  555.69   36.80
   0  -4   4  494.83   34.61
  -4   4   4  535.59   38.67
   0  -4   4  535.34   35.58
   4   0   4  511.81   36.62
   4   0   4  511.01   36.33
   3  -4  -4   89.06   13.04
   1   3  -4   93.36    9.99
  -4   1  -4  111.92   13.02
   1   3  -4   99.79    9.67
   3  -4  -4   98.03   12.95
  -4   1  -4   79.42   10.73
  -4   1  -4   97.85   13.88
   1   3  -4   98.69    9.72
   3  -4  -4  109.67   13.79
   4  -1   4   92.05   13.04
  -1  -3   4   80.37    9.47
  -3   4   4   76.22   11.57
   4  -1   4   94.17   12.42
  -1  -3   4   98.88    9.90
  -3   4   4   61.69   10.88
   4  -1   4   84.87   11.25
  -3   4   4  121.99   13.94
   2  -4  -4   37.80   10.54
  -4   2  -4   50.85   12.63
  -4   2  -4   28.85   10.41
   2   2  -4   47.95    5.81
  -4   2  -4   43.82   10.39
   2  -4  -4   36.29    9.81
   2   2  -4   46.17    6.02
   2  -4  -4   40.44    9.87
   2   2  -4   45.79    8.74
   4  -2   4   36.05   12.37
   4  -2   4   29.37    7.41
  -2   4   4   27.62   10.53
   4  -2   4   24.42    8.49
  -2  -2   4   47.40    6.15
  -2  -2   4   54.24    5.90
  -2   4   4   32.03    9.36
  -2   4   4   43.84    9.25
   1  -4  -4   92.01   12.64
   3   1  -4  117.15   12.36
   1  -4  -4   94.62   12.94
   1  -4  -4  108.67   10.69
  -4   3  -4   89.48   13.66
  -4   3  -4  101.16   13.19
  -4   3  -4  105.39   15.16
   4  -3   4   79.63   14.56
   4  -3   4   82.84   12.41
  -1   4   4   90.57   10.00
  -1   4   4   99.77   13.51
   4  -3   4   83.69   13.02
   0  -4  -4  522.30   37.30
  -4   4  -4  515.68   37.68
   4   0  -4  516.70   37.64
   4   0  -4  529.72   33.37
  -4   4  -4  554.72   39.39
   0  -4  -4  577.09   37.68
  -4   4  -4  546.75   38.04
   0  -4  -4  518.46   33.57
   4   0  -4  537.81   33.34
   0   4   4  543.66   37.43
   4  -4   4  571.28   38.61
   4  -4   4  519.65   39.15
  -4   0   4  509.61   37.98
   4  -4   4  516.75   37.73
  -4   0   4  523.91   33.40
   0   4   4  524.50   37.30
  -4   0   4  548.50   33.49
  -4   5  -4   -3.56   11.66
  -1  -4  -4    8.32    9.11
  -4   5  -4   11.06    8.92
   5  -1  -4    8.26   10.94
  -4   5  -4   14.42    8.03
   5  -1  -4    7.46    5.72
  -1  -4  -4    6.97    7.23
   5  -1  -4    4.92    5.60
   1   4   4    5.12    8.96
   4  -5   4    7.47    8.82
  -5   1   4    9.11    5.85
  -5   1   4   15.85   10.12
   1   4   4    4.41    7.81
  -5   1   4    1.31    5.89
   4  -5   4   -0.84    8.44
   4  -5   4   -9.44    9.66
   6  -2  -4   -0.20    6.31
  -4   6  -4   13.47   12.17
  -2  -4  -4   10.32    9.86
  -4   6  -4   10.99   11.22
   6  -2  -4    7.31    6.89
  -4   6  -4    7.14   10.55
   6  -2  -4    7.60   11.90
  -2  -4  -4    4.24    6.61
  -6   2   4   -8.97   11.72
   4  -6   4    9.44   11.03
   2   4   4    1.93    9.63
  -6   2   4   -3.67    7.12
   4  -6   4   19.82   11.73
   4  -6   4    3.35   10.69
  -6   2   4   -5.35    6.53
   2   4   4   -5.49    9.18
  -4   7  -4    4.57   13.04
  -3  -4  -4   30.08   10.87
   7  -3  -4   51.12   10.02
   7  -3  -4   46.45   15.51
   7  -3  -4   23.30    9.01
  -4   7  -4   44.98   13.67
  -7   3   4   48.07   16.86
   4  -7   4   26.50   12.24
   4  -7   4   46.71   12.77
  -7   3   4   29.10    8.78
   3   4   4   30.43   10.24
   4  -7   4   31.22   11.24
   3   4   4   23.70   10.79
  -7   3   4   28.33    9.13
  -4   8  -4   23.84   12.39
   8  -4  -4   16.47    9.86
  -4  -4  -4   20.76    4.73
  -4   8  -4   29.94   14.73
   8  -4  -4   29.81   16.03
  -4  -4  -4    9.40    9.64
  -4   8  -4    9.48   12.95
   8  -4  -4   26.63   10.36
   4  -8   4    9.32   11.81
   4  -8   4   22.83   13.70
   4   4   4    4.51   10.45
  -8   4   4    6.00    8.57
   4   4   4   13.49    9.67
  -8   4   4   19.68   15.75
   4  -8   4   23.31   14.10
  -8   4   4   10.69   10.17
  -4   9  -4   38.67   14.76
  -5  -4  -4   15.17   10.95
  -5  -4  -4   40.81    6.50
   9  -5  -4   42.30   11.15
  -4   9  -4   38.96   11.11
  -5  -4  -4   12.68    9.50
   9  -5  -4   19.66   10.64
  -4   9  -4   28.44   13.36
   9  -5  -4   45.16   18.43
   5   4   4   27.18   11.95
   4  -9   4   28.31   12.69
  -9   5   4   20.01   16.33
   5   4   4   34.21    6.90
   4  -9   4   35.13   12.97
  -9   5   4   28.71   11.94
   4  -9   4   45.02   17.62
   5   4   4   28.13   11.30
  -9   5   4   12.99   10.01
   8  -5  -4    5.79   11.29
  -5  -3  -4   11.72    9.89
  -3   8  -4   13.43   10.30
  -5  -3  -4   11.88   10.44
  -3   8  -4   10.79   11.66
  -3   8  -4    8.78   11.72
   8  -5  -4   26.16   16.73
   8  -5  -4   19.72   10.56
  -5  -3  -4   13.98    8.59
   5   3   4   11.56    8.05
   5   3   4   19.82   10.24
   3  -8   4   -8.34   11.26
  -8   5   4   -4.70    8.43
   3  -8   4   10.19   12.59
   3  -8   4    3.71   10.04
  -8   5   4   24.44   15.77
  -8   5   4   12.60   11.37
   5   3   4    6.50    9.39
  -5  -2  -4   -7.49    7.75
   7  -5  -4    1.56   13.39
  -5  -2  -4   -6.53    8.75
   7  -5  -4   -1.92    9.82
  -5  -2  -4    1.25    9.35
  -2   7  -4    0.29    9.48
  -2   7  -4   -1.59    8.92
  -2   7  -4    9.47    9.83
  -7   5   4   -7.72   10.11
   2  -7   4    4.35    8.27
   5   2   4   -2.11    9.24
   2  -7   4    3.49    9.02
   2  -7   4  -11.42   10.89
   5   2   4   17.71    8.78
  -7   5   4   -2.61   13.93
   5   2   4    4.85    8.02
  -1   6  -4   -0.86    7.06
   6  -5  -4   -6.81   12.08
   6  -5  -4   -0.99    7.15
  -1   6  -4   22.94    8.92
   6  -5  -4   -6.97   10.64
  -5  -1  -4   -3.60    8.34
  -5  -1  -4    5.75    9.00
  -1   6  -4   12.44    9.08
  -5  -1  -4  -15.14    9.15
   5   1   4   14.89    9.14
   5   1   4   -7.17    9.04
  -6   5   4   12.76    8.41
   1  -6   4    3.72    8.47
   5   1   4    4.89    7.84
   1  -6   4    8.56    7.92
  -6   5   4    8.07    9.99
  -6   5   4   -8.56   12.64
   1  -6   4    9.25   11.82
  -5   0  -4  749.08   48.28
   0   5  -4  663.89   46.10
   5  -5  -4  731.31   48.28
   5  -5  -4  697.55   49.59
   0   5  -4  693.51   46.26
   0   5  -4  673.51   44.85
   5  -5  -4  733.04   47.74
  -5   0  -4  679.51   46.84
  -5   5   4  677.78   48.00
  -5   5   4  688.59   49.65
   5   0   4  700.58   48.75
   0  -5   4  683.31   44.75
   0  -5   4  761.25   46.81
   0  -5   4  715.96   46.50
   5   0   4  799.64   50.63
   5   0   4  681.51   47.74
  -5   5   4  670.01   47.32
   1   4  -4    8.55    6.24
  -5   1  -4   -3.55    6.30
   4  -5  -4    5.17    9.26
  -5   1  -4   14.37   11.18
  -5   1  -4    7.86    9.27
   1   4  -4    1.47    6.57
   4  -5  -4   11.98    7.07
   4  -5  -4  -15.86   10.11
   1   4  -4   11.10    6.52
  -1  -4   4   -6.95    7.13
   5  -1   4    4.48   10.34
  -4   5   4   14.51   10.50
   5  -1   4   -5.75    8.45
  -4   5   4   -6.88    9.41
   5  -1   4   15.20    9.43
  -1  -4   4   -1.08    6.78
  -4   5   4   -2.55   11.20
   2   3  -4  173.14   17.37
   3  -5  -4  242.47   22.05
  -5   2  -4  215.03   21.38
   2   3  -4  203.59   16.59
   2   3  -4  220.93   16.42
   2   3  -4  214.96   17.63
   3  -5  -4  208.56   21.18
   3  -5  -4  214.87   21.53
  -5   2  -4  201.71   20.65
  -5   2  -4  204.63   19.86
  -2  -3   4  199.58   16.49
   5  -2   4  226.47   20.51
  -3   5   4  233.22   21.07
  -3   5   4  210.42   21.53
   5  -2   4  208.07   20.28
   5  -2   4  208.40   22.50
  -3   5   4  198.59   21.00
  -2  -3   4  228.95   16.81
   3   2  -4  211.28   19.32
  -5   3  -4  242.86   21.69
  -5   3  -4  222.39   24.45
   2  -5  -4  220.76   21.52
   3   2  -4  208.60   15.67
   2  -5  -4  216.71   19.75
   3   2  -4  203.89   15.45
  -5   3  -4  239.25   21.39
   2  -5  -4  201.24   20.83
  -2   5   4  210.51   19.43
   5  -3   4  241.22   20.95
   5  -3   4  226.07   23.19
  -3  -2   4  219.94   15.78
  -3  -2   4  225.89   15.76
   5  -3   4  235.19   22.28
  -2   5   4  202.40   21.09
  -2   5   4  217.13   21.63
  -5   4  -4   -2.79    9.07
  -5   4  -4   11.75   12.32
   4   1  -4   -2.96    8.29
   1  -5  -4   -7.45    7.96
   1  -5  -4   10.94    6.74
   1  -5  -4   -7.08    8.32
  -5   4  -4   24.89   10.88
  -4  -1   4    5.58    8.51
   5  -4   4   25.21   12.09
   5  -4   4    3.57   10.20
   5  -4   4   -0.16    9.24
  -1   5   4    9.98    9.05
  -4  -1   4    7.34    4.88
   5   0  -4  684.26   47.46
   5   0  -4  663.53   43.03
  -5   5  -4  756.88   50.18
   0  -5  -4  692.48   42.09
   0  -5  -4  683.88   47.18
  -5   5  -4  664.82   47.68
   0  -5  -4  693.78   46.77
   0  -5  -4  722.98   42.25
  -5   0   4  672.89   47.65
  -5   0   4  692.00   43.20
   5  -5   4  702.05   47.78
   5  -5   4  669.55   47.66
   0   5   4  708.89   47.24
   0   5   4  648.02   46.73
  -5   0   4  678.95   43.11
   6  -1  -4    4.16    6.38
  -1  -5  -4   21.11   10.93
   6  -1  -4   12.65    6.82
   6  -1  -4    2.93   19.75
  -5   6  -4   -7.87    7.86
  -5   6  -4  -18.83   11.86
  -1  -5  -4    5.39    9.43
  -5   6  -4    3.59   10.86
   1   5   4  -11.67    8.10
   1   5   4   12.97   10.07
  -6   1   4    4.22    6.39
  -6   1   4   17.65    6.76
  -6   1   4    1.32   11.53
   5  -6   4   14.34   12.30
   5  -6   4  -11.96   10.19
   5  -6   4   -3.07   10.25
  -2  -5  -4   11.30   10.56
   7  -2  -4   -1.56    7.05
   7  -2  -4   -0.01    7.55
  -5   7  -4    8.96   13.99
   7  -2  -4  -15.17   12.85
  -5   7  -4  -12.75    8.13
  -5   7  -4   10.59   11.46
  -7   2   4   -0.32    7.71
   5  -7   4   26.94   13.46
   5  -7   4  -14.00   11.56
   5  -7   4   20.55   10.70
   2   5   4    4.59    9.39
  -7   2   4   10.56   15.33
  -7   2   4   15.25    7.77
   2   5   4    6.93    9.95
   8  -3  -4   21.18    9.42
  -3  -5  -4   10.38   10.28
  -5   8  -4   37.72   15.60
   8  -3  -4   -4.89    8.13
  -5   8  -4   14.72   11.35
  -3  -5  -4    1.99    8.48
   8  -3  -4   19.65   15.52
   5  -8   4   -4.31   11.32
   3   5   4   -3.10   10.82
   5  -8   4    8.40   11.54
  -8   3   4   10.69    8.57
   3   5   4  -12.35    9.03
  -8   3   4   13.42   15.12
   5  -8   4   27.90   13.76
  -8   3   4    5.35    9.05
  -5   9  -4   20.62   10.44
  -5   9  -4   12.79   13.02
   9  -4  -4   21.40    9.81
   9  -4  -4   39.37   17.05
   9  -4  -4   45.15   12.46
  -5   9  -4   29.82   14.34
  -4  -5  -4   32.93   12.29
  -4  -5  -4   46.15   12.36
  -9   4   4   12.12   10.20
   5  -9   4   21.65   15.24
  -9   4   4   45.38   11.49
   4   5   4   20.32   11.29
  -9   4   4   20.16   17.42
   4   5   4   29.55    9.94
   5  -9   4   36.55   14.37
   5  -9   4    4.39   11.60
  10  -5  -4   -1.23    9.50
  -5  -5  -4   10.41   10.02
  10  -5  -4  -15.69   10.74
  10  -5  -4  -15.85   17.63
  -5  10  -4  -10.86   12.18
  -5  10  -4   -8.34   13.41
  -5  10  -4    5.97   14.15
  -5  -5  -4    5.36   10.54
 -10   5   4    4.73   11.04
   5 -10   4  -13.79   12.72
   5   5   4   -5.97   10.75
   5 -10   4  -11.68   14.59
 -10   5   4    4.50   11.00
   5   5   4    9.59   11.04
   5 -10   4    4.89   12.98
 -10   5   4   21.18   18.51
  -5  11  -4   31.54   15.13
  -5  11  -4    5.50   14.02
  -6  -5  -4   18.62   13.44
  -6  -5  -4   -5.01   11.29
  -5  11  -4    6.88   16.68
 -11   6   4   -4.68   12.52
   5 -11   4   34.11   18.39
 -11   6   4   27.50   18.01
   5 -11   4   12.47   18.61
  -4  10  -4   16.99   14.77
  -4  10  -4   14.74   13.03
  10  -6  -4   26.32   12.15
  -6  -4  -4    9.98   11.05
  -6  -4  -4   18.60    6.36
  10  -6  -4   19.50   11.20
  -4  10  -4    5.39   12.23
  10  -6  -4  -24.40   16.91
 -10   6   4   16.11   13.04
   6   4   4   13.22    7.29
 -10   6   4   25.35   19.16
   6   4   4   18.68   12.14
   6   4   4    9.96   11.09
   4 -10   4   -6.29   11.59
   4 -10   4    7.91   12.85
 -10   6   4    0.46    9.53
   4 -10   4   15.76   16.02
  -3   9  -4    4.84   12.64
   9  -6  -4   17.04   10.96
  -6  -3  -4   24.58   10.93
   9  -6  -4   -5.82   12.03
  -6  -3  -4    1.60    8.60
  -3   9  -4   13.58   12.89
  -6  -3  -4   12.34   10.39
   9  -6  -4  -17.17   25.66
  -3   9  -4   13.41   11.33
   3  -9   4   -2.37   10.43
   6   3   4    3.46   10.56
   3  -9   4   -5.91   11.27
  -9   6   4   -5.69    9.18
   6   3   4    0.58   10.70
   6   3   4   12.73    9.03
   3  -9   4   -0.77    9.34
  -9   6   4   12.74   12.17
  -9   6   4  -12.12   14.50
   8  -6  -4  339.95   33.98
   8  -6  -4  290.03   27.75
  -6  -2  -4  303.71   26.07
  -2   8  -4  288.05   25.96
   8  -6  -4  315.09   27.25
  -6  -2  -4  257.01   24.81
  -6  -2  -4  313.72   25.70
  -2   8  -4  301.05   27.32
  -2   8  -4  304.92   27.95
   2  -8   4  280.34   28.76
  -8   6   4  327.26   29.63
   6   2   4  291.62   25.73
   2  -8   4  289.53   27.09
   2  -8   4  287.61   25.09
   6   2   4  278.97   26.16
  -8   6   4  306.96   32.12
  -8   6   4  208.39   26.49
   6   2   4  293.11   25.58
  -6  -1  -4   61.96   12.15
  -6  -1  -4   71.98   13.34
  -1   7  -4   60.79   10.82
  -1   7  -4   73.90   13.25
   7  -6  -4   70.89   17.11
  -1   7  -4   41.04   11.96
  -6  -1  -4   40.26   12.70
   7  -6  -4   55.21   12.29
   7  -6  -4   90.22   16.15
   6   1   4   56.18   12.62
   1  -7   4   45.61   11.64
   6   1   4   76.70   12.35
   6   1   4   37.72   11.68
   1  -7   4   61.38    9.87
  -7   6   4   46.26   11.51
   1  -7   4   42.99   11.18
  -7   6   4   49.95   13.50
  -7   6   4   62.50   16.89
  -6   0  -4   12.13    8.66
  -6   0  -4   -0.32    9.87
  -6   0  -4   -2.75   11.61
   0   6  -4    6.22    7.49
   6  -6  -4  -13.77   12.29
   0   6  -4  -10.87    8.37
   6  -6  -4   -7.39    9.83
   6  -6  -4   15.47   10.40
   6   0   4   -3.92    8.42
  -6   6   4    9.10   11.16
  -6   6   4   -6.67    9.44
   6   0   4   -9.62    8.42
   0  -6   4    4.02    8.91
   6   0   4   -1.46   10.62
   0  -6   4    0.76    9.11
   5  -6  -4   -6.78    6.94
   5  -6  -4  -11.48   12.26
   1   5  -4    1.22    5.83
  -6   1  -4    9.47   12.37
  -6   1  -4   -6.40    9.25
   1   5  -4    9.07    7.89
   5  -6  -4    7.91    9.41
   1   5  -4    4.64    6.72
  -5   6   4   21.67   11.55
   6  -1   4    9.80   11.28
  -5   6   4    2.45   11.94
   6  -1   4   -8.25    9.16
  -1  -5   4   -0.83    7.68
  -5   6   4   -1.46   10.93
  -1  -5   4   -4.15    7.71
   4  -6  -4    9.32    9.92
  -6   2  -4   -0.93    9.72
   2   4  -4    6.40    6.85
   2   4  -4   -4.02    6.33
   2   4  -4    7.83    6.08
  -6   2  -4   -8.93    8.63
   2   4  -4   -1.31    6.66
   4  -6  -4    8.68   12.23
   4  -6  -4   -7.07   10.61
  -6   2  -4   -5.27   12.39
  -2  -4   4    4.28    6.54
   6  -2   4   -2.03    8.73
  -4   6   4   -3.84    9.52
  -2  -4   4   -4.05    6.94
  -4   6   4   -7.39    7.59
  -4   6   4   -0.99   10.40
   3   3  -4   31.33    6.69
  -6   3  -4   37.71   14.66
  -6   3  -4   45.67   11.77
  -6   3  -4   28.46   10.72
   3  -6  -4   23.65   11.06
   3  -6  -4   40.07   10.97
   3   3  -4   37.00    8.24
   3   3  -4   32.83    6.96
   3  -6  -4   27.91   11.64
  -3   6   4   45.78   12.38
  -3   6   4   34.68   10.10
  -3  -3   4   20.66    6.95
   6  -3   4   37.13   13.32
   6  -3   4   12.97    7.95
  -3   6   4   47.18   12.61
   6  -3   4   21.15   10.91
  -3  -3   4   35.01    6.75
  -6   4  -4    4.98   11.15
   2  -6  -4    1.46    8.73
  -6   4  -4   -1.86   13.50
  -6   4  -4    4.51    9.98
   4   2  -4   -2.76    7.66
   2  -6  -4    8.01    9.33
   2  -6  -4    2.12   11.68
   4   2  -4   -1.69    5.18
   4   2  -4   -2.42    5.25
  -4  -2   4  -14.73    5.16
  -4  -2   4    8.49    5.08
  -2   6   4   11.25    9.42
  -2   6   4   -5.22    7.52
  -2   6   4    2.71   10.52
   6  -4   4   -5.06    7.92
   6  -4   4  -14.07    9.84
   6  -4   4    1.30   12.66
  -6   5  -4   -7.80   10.51
   1  -6  -4    8.85    6.91
   1  -6  -4   -8.00   10.32
   5   1  -4    3.31    5.23
   5   1  -4    9.83   10.09
  -6   5  -4   -1.54    9.98
  -6   5  -4   -7.75   13.35
   5   1  -4    4.06    4.96
   1  -6  -4    3.35   10.78
  -5  -1   4    6.89    5.39
  -5  -1   4    1.23    5.52
  -1   6   4   21.68   11.66
  -5  -1   4    0.05    8.97
  -1   6   4    9.33   10.80
   6  -5   4    6.78   10.90
   6  -5   4   18.97   12.89
   6  -5   4    7.61    8.21
   0  -6  -4    5.18   11.33
   6   0  -4    4.75    5.63
  -6   6  -4   11.07   10.16
   6   0  -4   -0.20   12.60
  -6   6  -4   -5.11   11.38
   0  -6  -4   13.25   10.34
   6   0  -4    9.41    6.39
  -6   6  -4   -5.28   14.59
   0   6   4   -8.05    9.30
   0   6   4   -2.28   10.50
  -6   0   4    5.44    6.01
  -6   0   4   -3.43    6.31
   6  -6   4   24.07   12.41
   6  -6   4    3.58   13.67
  -6   0   4    4.71   11.29
   6  -6   4   21.61   12.35
   7  -1  -4   44.41   14.95
   7  -1  -4   66.77    9.44
  -6   7  -4   46.85   15.02
  -6   7  -4   54.76   16.39
  -1  -6  -4   30.75   12.61
   7  -1  -4   55.47    9.22
  -6   7  -4   29.74    9.70
  -1  -6  -4   84.74   14.77
   1   6   4   63.28   13.88
   1   6   4   45.01   12.18
   6  -7   4   65.25   15.15
  -7   1   4   57.01    9.25
   6  -7   4   53.93   16.36
  -7   1   4   73.58    9.95
   6  -7   4   48.16   12.66
   8  -2  -4  282.36   23.25
   8  -2  -4  312.30   23.39
   8  -2  -4  325.26   31.55
  -2  -6  -4  311.24   27.60
  -6   8  -4  328.78   32.03
  -6   8  -4  336.13   32.78
  -8   2   4  304.55   30.99
   6  -8   4  258.58   28.30
  -8   2   4  304.17   23.95
   2   6   4  282.53   27.20
   6  -8   4  244.15   25.59
  -8   2   4  253.93   23.00
   6  -8   4  219.30   24.54
   2   6   4  263.97   26.52
  -6   9  -4    2.50   12.16
  -3  -6  -4   -5.58    9.55
   9  -3  -4   17.58    9.72
  -6   9  -4   16.52   15.25
  -6   9  -4   -0.34    9.43
  -3  -6  -4    2.68    9.48
   9  -3  -4   11.95   16.05
   6  -9   4   -2.20   14.45
   6  -9   4   -5.46   14.59
   3   6   4    6.16   12.26
   6  -9   4   13.49   12.10
  -9   3   4    3.00    9.28
  -9   3   4    2.34   14.93
   3   6   4   17.55   11.18
  -9   3   4   -6.07    8.42
  -4  -6  -4   16.95   11.73
  -4  -6  -4   20.56   12.90
  10  -4  -4   15.37   10.69
  -6  10  -4   22.18   15.25
  10  -4  -4  -11.97   18.06
  10  -4  -4    9.32   10.76
  -6  10  -4   -6.68   16.71
  -6  10  -4   13.48   15.28
   4   6   4   19.23   12.02
   6 -10   4    8.64   13.66
   6 -10   4   10.10   14.91
 -10   4   4   19.79   17.00
   4   6   4   26.14   10.97
 -10   4   4   10.59   10.10
 -10   4   4   23.91   12.01
   6 -10   4    0.90   15.31
  -6  11  -4   27.04   16.23
  -5  -6  -4   11.13   12.45
  -6  11  -4   27.94   18.32
   6 -11   4   23.72   16.99
 -11   5   4   24.69   17.88
 -11   5   4   11.96   11.22
   6 -11   4   -5.23   15.39
 -11   5   4   11.95   11.80
  -6  12  -4   14.75   16.17
 -12   6   4   -6.25   17.15
 -12   6   4   -6.96   21.45
   6 -12   4   -2.86   16.34
  -7  -6  -4   21.24   13.55
 -13   7   4   59.18   22.23
   6 -13   4   45.63   18.68
 -13   7   4   36.08   15.13
  -5  12  -4   14.21   14.37
   5 -12   4   16.60   15.84
 -12   7   4   -7.90   18.50
  -4  11  -4    6.71   15.14
  -7  -4  -4   22.60   11.53
  -4  11  -4   34.57   18.86
   4 -11   4   -1.49   13.45
 -11   7   4   -0.32   18.71
 -11   7   4  -16.50   13.27
  -7  -3  -4   18.72   11.75
  -7  -3  -4    7.91   10.37
  -3  10  -4   22.63   15.19
  -7  -3  -4   44.33   10.45
  10  -7  -4   -3.04   18.21
  -3  10  -4   26.79   12.38
  10  -7  -4   14.91   13.05
  -3  10  -4   38.85   14.99
   3 -10   4   10.29   11.26
 -10   7   4   35.95   19.41
   3 -10   4   29.02   11.38
   7   3   4   24.34   18.00
 -10   7   4   11.42   14.00
   3 -10   4   33.97   16.18
   7   3   4   21.00   10.64
   7   3   4   23.54   12.17
  -7  -2  -4   -3.86   10.62
   9  -7  -4   -3.88   11.49
  -7  -2  -4   -7.24    9.24
  -2   9  -4   21.56   12.72
  -2   9  -4    7.38    9.76
   9  -7  -4    8.75   13.01
   9  -7  -4   35.53   18.99
  -2   9  -4    5.88   12.92
  -7  -2  -4   -8.88   10.05
   7   2   4    0.19    9.74
  -9   7   4    6.19   12.59
  -9   7   4  -27.93   16.06
   7   2   4   -6.30    9.93
   2  -9   4   -2.53    8.29
   2  -9   4   18.72   12.51
  -9   7   4   -2.28   13.63
   2  -9   4    0.79    8.81
   7   2   4    7.24   10.33
   8  -7  -4  -23.59   10.72
  -1   8  -4   -4.02    9.86
   8  -7  -4    1.48   15.92
  -1   8  -4   -8.88   10.62
  -1   8  -4  -15.88    8.44
   8  -7  -4   -5.68   11.71
  -7  -1  -4    7.85    9.10
  -7  -1  -4   -0.04   11.13
  -7  -1  -4   -2.23    9.22
   1  -8   4  -18.73    8.37
   7   1   4   -5.49    8.51
   1  -8   4    4.80   11.88
   7   1   4  -15.31   12.51
  -8   7   4  -18.79   14.60
   1  -8   4   -2.74    6.82
  -8   7   4   11.00   11.35
   7   1   4   -0.41   10.39
  -8   7   4  -24.94   10.04
   7  -7  -4  155.69   20.28
  -7   0  -4  151.55   18.68
   0   7  -4  136.30   14.68
  -7   0  -4  126.12   16.67
   0   7  -4  133.78   16.98
   7  -7  -4   93.27   20.09
   7  -7  -4  169.18   21.74
  -7   0  -4  142.92   16.71
   0   7  -4  135.20   17.26
   0  -7   4  108.42   15.04
   7   0   4  123.46   16.51
   7   0   4  108.80   17.40
  -7   7   4   90.38   13.84
  -7   7   4  131.86   20.96
   7   0   4  133.29   16.96
   0  -7   4  130.07   15.65
  -7   7   4  126.80   18.75
   6  -7  -4   31.44   10.50
   6  -7  -4   59.33   14.52
  -7   1  -4   65.10   12.85
   6  -7  -4   29.50   15.74
   1   6  -4   79.77   12.07
   1   6  -4   53.92    8.02
  -7   1  -4   28.16   15.00
  -7   1  -4   73.99   13.34
  -6   7   4   56.40   14.89
   7  -1   4   74.06   13.90
  -6   7   4   51.50   14.34
   7  -1   4   56.43   14.65
  -1  -6   4   53.53   12.27
  -1  -6   4   65.97   12.00
  -6   7   4   61.89   15.88
   7  -1   4   86.02   13.90
   2   5  -4   -4.59    5.82
  -7   2  -4    4.52   15.26
   5  -7  -4   -5.30    6.89
   5  -7  -4    8.35   11.58
   2   5  -4    1.57    5.98
  -7   2  -4    3.96   10.83
   2   5  -4   -9.38    7.08
   5  -7  -4    4.95   12.68
   2   5  -4   -6.93    7.72
   7  -2   4    0.42   12.92
  -5   7   4  -10.25   10.33
  -2  -5   4    5.22    8.34
  -5   7   4   10.18   12.78
  -5   7   4    0.94   11.42
  -2  -5   4    0.11    7.88
   7  -2   4   10.28   10.99
   7  -2   4    1.54    8.92
   3   4  -4   48.76    8.36
  -7   3  -4   45.34   16.61
  -7   3  -4   22.51   11.22
  -7   3  -4   27.34   10.79
   3   4  -4   42.92    8.61
   3   4  -4   46.52    8.58
   3   4  -4   35.31    8.26
   4  -7  -4   40.87   13.12
   4  -7  -4   14.97   12.37
   4  -7  -4   48.85   12.67
   7  -3   4   24.85    9.36
   7  -3   4   25.61   10.89
  -3  -4   4   43.95    7.81
  -4   7   4   41.77   12.85
   7  -3   4   36.47   15.79
  -4   7   4   59.48   14.50
  -3  -4   4   32.18    8.85
  -4   7   4   29.35   13.45
   4   3  -4   32.24    6.93
  -7   4  -4   21.35   15.67
   4   3  -4   32.83    7.16
   3  -7  -4   35.59   11.19
   3  -7  -4   46.43   14.11
  -7   4  -4   21.22   10.71
  -7   4  -4   44.31   12.41
   3  -7  -4   37.14   11.64
   4   3  -4   50.18   10.13
   7  -4   4   24.71   11.56
   7  -4   4   47.32   15.05
  -3   7   4   24.96   10.49
   7  -4   4    8.91   11.17
  -4  -3   4   44.00    7.31
  -3   7   4   32.17   11.69
  -4  -3   4   33.64    7.31
  -3   7   4   14.57   12.64
   2  -7  -4   -3.10   11.85
  -7   5  -4   -7.11   10.69
  -7   5  -4  -19.44   10.54
   5   2  -4    4.86    5.76
   2  -7  -4   17.92    9.00
   5   2  -4    0.64    9.30
  -7   5  -4   12.71   15.50
   2  -7  -4   -3.74   11.73
   5   2  -4    5.21    5.81
   7  -5   4    6.67   14.26
  -2   7   4    9.13   11.09
   7  -5   4   10.87   11.90
  -2   7   4    9.85   18.97
  -2   7   4    6.18    7.64
  -5  -2   4    3.82    5.98
   7  -5   4   -2.26   10.96
  -5  -2   4   -1.93    5.87
   6   1  -4   74.58    8.41
   1  -7  -4   51.10   11.93
  -7   6  -4   41.06   16.34
   6   1  -4   56.40    8.07
   6   1  -4   49.70   12.79
   1  -7  -4   43.44   14.02
   1  -7  -4   57.60    7.97
  -7   6  -4   40.56   12.99
  -7   6  -4   52.72   13.71
   7  -6   4   51.51   16.40
  -6  -1   4   71.28    8.52
  -1   7   4   53.30   13.80
  -1   7   4   43.24   10.89
   7  -6   4   38.85   14.06
   7  -6   4   85.78   16.41
  -6  -1   4   61.96    7.95
  -6  -1   4   56.56   12.79
   0  -7  -4  131.51   16.80
  -7   7  -4  117.47   18.07
  -7   7  -4  141.31   20.99
   7   0  -4  123.37   18.01
   7   0  -4  123.11   11.89
   0  -7  -4  117.99   18.13
   7   0  -4  116.41   11.80
   0   7   4   98.75   17.04
  -7   0   4  132.66   18.66
   0   7   4   96.54   14.45
   7  -7   4  120.42   21.32
  -7   0   4  107.39   11.58
  -7   0   4  121.71   12.15
   7  -7   4  108.04   17.16
  -7   8  -4    2.41   15.50
   8  -1  -4   -0.69    6.61
   8  -1  -4   -1.83   14.34
  -1  -7  -4   -1.99   11.14
  -7   8  -4    1.11   12.45
  -7   8  -4   -7.54   10.56
   8  -1  -4    4.69    7.73
  -1  -7  -4   -1.34    9.01
  -8   1   4    5.32    7.84
   1   7   4    2.22   11.49
  -8   1   4  -15.43   13.04
  -8   1   4    4.42    7.24
   1   7   4   -3.94   10.19
   7  -8   4   -0.08   13.12
   7  -8   4  -19.76   14.48
   9  -2  -4   -5.34   15.18
  -7   9  -4   -6.69   12.67
  -7   9  -4  -11.39   15.35
  -2  -7  -4    7.88   10.85
  -7   9  -4    5.12   11.98
   9  -2  -4   12.79    9.01
   9  -2  -4   -2.08    8.10
   2   7   4    7.88   11.43
   7  -9   4   11.27   15.69
  -9   2   4  -11.49    8.37
  -9   2   4    5.16    8.91
   7  -9   4   13.58   13.94
  -9   2   4   -9.31   14.67
  10  -3  -4   26.30   10.65
  -7  10  -4   29.89   17.40
  10  -3  -4   -0.62   18.50
  -3  -7  -4   21.26   11.81
  -3  -7  -4   21.73   11.54
  -7  10  -4   23.54   10.88
  -7  10  -4   34.81   17.94
  10  -3  -4   26.05   10.95
   7 -10   4   34.55   15.95
   3   7   4   43.63   14.18
 -10   3   4   24.56   11.07
 -10   3   4   24.88   17.47
   7 -10   4   29.90   17.58
   3   7   4   29.96   14.63
 -10   3   4   36.29   10.50
   7 -10   4   18.37   15.81
  -4  -7  -4   -9.51   10.88
  -7  11  -4   29.43   17.07
  -7  11  -4   18.66   13.54
  -7  11  -4   24.09   20.50
 -11   4   4   22.04   17.43
 -11   4   4   16.32   10.67
   7 -11   4   -4.83   15.66
 -11   4   4   16.64   11.81
  -7  12  -4   11.63   16.14
 -12   5   4   10.01   17.90
 -12   5   4  -11.44   17.03
   7 -12   4   -6.81   16.31
  -7  13  -4   52.19   18.98
  -6  -7  -4   20.95   13.60
 -13   6   4   44.77   21.18
 -13   6   4   27.01   14.96
   7 -13   4   19.40   18.63
  -7  -7  -4    7.79   13.78
   7 -14   4   30.77   18.97
 -14   7   4    5.28   19.35
 -14   7   4    2.62   14.19
  -8  -7  -4    5.00   14.94
 -15   8   4  -11.26   15.00
   7 -15   4   10.66   20.29
 -15   8   4   37.36   24.53
  -8  -6  -4   14.27   13.62
 -14   8   4    7.88   15.88
 -14   8   4   53.59   23.89
   6 -14   4    8.72   17.95
  -8  -5  -4   -2.82   12.08
 -13   8   4   -4.65   15.21
 -13   8   4   45.46   22.06
   5 -13   4    9.58   19.68
  -8  -4  -4   -3.37   10.55
 -12   8   4    5.50   18.77
 -12   8   4  -16.09   18.75
   4 -12   4    3.35   16.58
  -8  -3  -4  150.74   17.47
  -3  11  -4  154.83   17.66
  -8  -3  -4  164.19   19.86
 -11   8   4  183.01   23.29
 -11   8   4  191.00   28.95
   3 -11   4  105.06   19.71
  -2  10  -4   -1.18   12.42
  -8  -2  -4   -0.93    9.82
  -8  -2  -4   12.37   11.37
  -2  10  -4    4.70    9.17
  -8  -2  -4   -5.03   10.33
  10  -8  -4   -3.85   12.31
   8   2   4   -9.00   11.88
   2 -10   4  -13.79   11.34
 -10   8   4   -3.51   17.99
 -10   8   4    4.05   13.55
   9  -8  -4    2.81   13.14
  -8  -1  -4   11.33   10.40
  -1   9  -4   -0.75   12.50
   9  -8  -4  -11.39   16.89
  -8  -1  -4   19.51   11.83
  -1   9  -4   13.60    8.44
   9  -8  -4    6.36   15.18
  -8  -1  -4   10.48   13.70
  -1   9  -4   18.94   11.72
  -9   8   4   25.62   18.19
   8   1   4   20.11   13.32
   8   1   4   -4.18   10.35
  -9   8   4  -12.62   14.88
   1  -9   4   16.14   10.95
  -9   8   4    8.39   10.09
   1  -9   4   13.87   12.22
   8   1   4    4.23   11.01
   0   8  -4   34.82   13.11
  -8   0  -4   49.79   11.78
   8  -8  -4   29.51   17.68
   8  -8  -4   41.65   15.16
  -8   0  -4   58.71   15.36
   0   8  -4   46.17    7.57
   8  -8  -4   22.28   12.42
  -8   0  -4   36.89   10.73
   8   0   4   43.39   12.51
  -8   8   4   26.03   17.56
  -8   8   4   35.81   15.80
   8   0   4   18.78   13.83
  -8   8   4   19.58   13.96
   0  -8   4   46.83   13.99
   8   0   4   24.29   11.74
   0  -8   4   32.44   12.35
   1   7  -4   -7.43    9.21
   7  -8  -4    1.48   15.57
   7  -8  -4  -12.95   11.60
   7  -8  -4   -3.95   10.47
  -8   1  -4   -1.49   14.02
  -8   1  -4   -2.22    9.44
   1   7  -4   -6.90    8.67
  -8   1  -4   -7.09    9.58
   8  -1   4   -1.56    9.24
  -7   8   4   -5.43   13.08
   8  -1   4   13.10   13.75
  -1  -7   4    6.52    9.57
  -1  -7   4   20.92   10.37
   8  -1   4  -10.83    8.95
  -7   8   4   -7.96   14.21
  -7   8   4  -14.35   11.61
   6  -8  -4  326.15   31.74
   2   6  -4  270.25   19.55
   6  -8  -4  296.78   32.41
   6  -8  -4  276.71   28.66
   2   6  -4  252.26   23.85
   2   6  -4  305.56   24.51
  -8   2  -4  286.23   27.09
   2   6  -4  267.09   19.46
  -8   2  -4  268.93   25.77
  -8   2  -4  316.02   32.24
  -2  -6   4  310.79   24.91
   8  -2   4  289.21   26.76
  -6   8   4  297.65   30.77
  -2  -6   4  304.56   24.14
   8  -2   4  258.21   26.52
   8  -2   4  290.87   28.92
  -6   8   4  319.34   30.47
  -6   8   4  257.49   27.81
   3   5  -4    0.75    8.02
  -8   3  -4    4.14   10.85
   3   5  -4   18.26    7.32
   3   5  -4   13.41    6.53
   5  -8  -4   -2.59   13.28
   5  -8  -4    0.01    7.87
  -8   3  -4   30.02   16.53
  -8   3  -4    0.94    7.63
   3   5  -4   24.95    8.78
   5  -8  -4   10.81   10.95
  -5   8   4   -1.19   12.79
   8  -3   4   21.45   16.04
   8  -3   4   12.33   11.57
  -5   8   4    3.30   12.47
  -3  -5   4   18.80    8.12
   8  -3   4    5.16   12.11
  -5   8   4   13.37   12.04
  -3  -5   4   11.51    8.71
   4   4  -4   21.08    8.35
   4  -8  -4   13.85   11.88
   4   4  -4   16.76    7.46
   4   4  -4   22.83    8.58
  -8   4  -4    9.96   11.64
  -8   4  -4    3.83    9.73
   4  -8  -4    1.11   12.01
  -8   4  -4   19.90   17.19
   4   4  -4   26.14    7.67
   4  -8  -4   31.50   15.37
   8  -4   4    2.90   12.36
  -4   8   4    1.98   13.11
  -4   8   4   20.85   11.64
  -4  -4   4   19.54    7.45
  -4   8   4   18.90   13.62
   8  -4   4   41.57   16.79
  -4  -4   4   17.27    7.84
   8  -4   4   24.50   12.09
   3  -8  -4   -1.81   13.31
   3  -8  -4   27.46   13.83
  -8   5  -4   31.23   13.18
   5   3  -4    7.55    6.94
  -8   5  -4   27.25   11.40
   5   3  -4   13.06    6.86
  -8   5  -4    4.51   16.08
   5   3  -4    4.77    8.90
   3  -8  -4    3.99   10.44
   8  -5   4   -2.18   15.07
  -5  -3   4   19.85    7.23
  -3   8   4   24.27   13.47
   8  -5   4   25.73   11.97
  -3   8   4    6.69    9.68
   8  -5   4   -0.84   12.16
  -3   8   4    6.88   12.68
  -5  -3   4    6.38    6.73
   2  -8  -4  337.68   30.06
  -8   6  -4  279.21   29.72
  -8   6  -4  385.11   35.40
   6   2  -4  256.76   26.44
   2  -8  -4  304.85   30.93
   6   2  -4  310.94   21.89
   6   2  -4  264.32   22.38
   2  -8  -4  275.70   23.82
  -8   6  -4  288.31   30.67
   8  -6   4  322.13   32.15
  -2   8   4  295.97   29.53
   8  -6   4  328.31   30.62
   8  -6   4  332.93   29.41
  -6  -2   4  300.79   22.02
  -8   7  -4  -13.85   16.39
   1  -8  -4    2.51   10.35
   7   1  -4    0.64    6.70
  -8   7  -4   -8.13    9.98
  -8   7  -4   11.92   13.42
   7   1  -4   -8.81   11.74
   1  -8  -4  -16.42   11.80
  -7  -1   4    4.91    6.71
   8  -7   4  -21.71   12.77
   8  -7   4    6.88   15.76
  -1   8   4   -4.53   12.10
  -7  -1   4   -4.39   10.74
  -7  -1   4   -7.90    6.73
   8  -7   4    8.50   12.81
  -1   8   4    0.98   12.33
   8   0  -4   41.57    8.61
  -8   8  -4   33.23   15.94
   0  -8  -4   39.24   13.32
  -8   8  -4   16.39   16.98
   8   0  -4    9.32   14.28
   0  -8  -4   33.46   15.09
   8   0  -4   48.18   10.95
  -8   8  -4   36.53   16.51
   0   8   4   54.18   13.17
   8  -8   4   42.61   14.61
   0   8   4   68.04   13.78
   8  -8   4   36.32   17.44
   8  -8   4   35.59   15.42
  -8   0   4   50.21    9.09
  -8   0   4   61.88    9.71
  -8   0   4   38.19   14.27
   9  -1  -4    1.29    7.36
  -1  -8  -4    0.30   10.31
  -8   9  -4    0.64   16.84
   9  -1  -4   13.97   10.08
  -8   9  -4   13.70   12.28
  -1  -8  -4    5.41   11.59
  -8   9  -4    9.71   12.48
   9  -1  -4    7.23   15.77
   8  -9   4   23.43   15.49
  -9   1   4   12.12    8.56
   1   8   4  -24.49   13.24
  -9   1   4   11.16   14.25
   8  -9   4   14.15   12.88
  -9   1   4    2.13    8.62
   1   8   4    5.23   11.41
  -2  -8  -4   16.22   11.98
  -8  10  -4    2.61   11.69
  -8  10  -4   23.79   18.32
  10  -2  -4  -20.96   16.85
  -8  10  -4   25.37   14.84
   8 -10   4  -13.53   14.12
 -10   2   4    6.57    9.25
   2   8   4   14.87   12.30
 -10   2   4   -4.65    9.17
 -10   2   4   10.22   15.20
   8 -10   4   -4.42   18.02
   8 -10   4   -1.46   15.16
  -3  -8  -4  149.46   21.00
  -8  11  -4  114.22   23.39
  -8  11  -4  132.95   24.58
   8 -11   4   87.06   24.27
 -11   3   4  156.30   24.52
 -11   3   4  150.42   17.60
   8 -11   4  180.07   26.68
 -11   3   4  149.37   17.34
  -8  12  -4  -14.29   16.04
  -4  -8  -4   21.36   15.54
   8 -12   4  -13.53   17.18
 -12   4   4   18.62   17.99
 -12   4   4   -4.81   11.25
  -5  -8  -4   18.48   13.72
  -8  13  -4   13.83   17.97
   8 -13   4   22.36   19.70
 -13   5   4  -10.27   12.49
 -13   5   4    2.40   18.50
  -6  -8  -4   36.42   15.31
   8 -14   4   22.74   23.24
 -14   6   4   14.34   14.17
 -14   6   4   22.88   21.19
  -7  -8  -4    7.55   15.64
 -15   7   4   13.66   15.45
 -15   7   4   17.40   22.20
  -9  -6  -4   -4.66   17.64
 -15   9   4   -9.96   16.16
   6 -15   4    4.06   19.43
 -15   9   4    1.51   25.54
  -9  -5  -4   39.57   15.34
   5 -14   4   99.88   25.45
 -14   9   4   44.95   19.14
 -14   9   4   56.27   26.03
  -9  -4  -4    8.84   12.24
   4 -13   4   -5.05   15.32
 -13   9   4   -4.49   16.05
 -13   9   4   15.72   20.98
  -9  -3  -4    1.89   11.88
 -12   9   4   21.53   20.12
   3 -12   4   -9.62   30.37
  -9  -2  -4   -0.44   11.00
  -9  -2  -4   10.51   12.16
   2 -11   4   16.17   15.13
 -11   9   4   18.05   18.21
 -11   9   4   23.30   20.67
  10  -9  -4   11.63   15.66
  -9  -1  -4    6.09   12.52
  -9  -1  -4   16.59   11.30
  -9  -1  -4   -3.49   10.46
   1 -10   4   20.02   12.72
 -10   9   4  -17.43   17.55
 -10   9   4  -11.45   17.06
  -9   0  -4    2.61   12.53
  -9   0  -4   -4.83   10.23
  -9   0  -4   -4.94   10.71
   9  -9  -4  -22.91   16.13
   9  -9  -4  -29.41   13.81
   0   9  -4   -3.16   10.64
   9  -9  -4  -13.22   14.76
  -9   9   4  -19.13   16.38
   0  -9   4    1.59   11.82
   0  -9   4   -1.26   10.91
  -9   9   4   13.75   17.33
   9   0   4  -28.73   13.60
  -9   9   4   20.56   26.25
   8  -9  -4    9.39   11.59
   8  -9  -4  -15.05   15.82
   8  -9  -4    1.59   13.35
  -9   1  -4   -5.64   11.29
  -9   1  -4   11.82   14.67
  -9   1  -4    4.08    9.55
   1   8  -4    8.45   10.52
   1   8  -4    2.18   10.31
  -8   9   4    9.36   15.49
   9  -1   4   15.17   16.10
  -8   9   4   23.54   13.96
  -1  -8   4    3.85   11.99
   9  -1   4    6.17   10.64
   9  -1   4    9.04    9.86
  -1  -8   4  -11.10   10.27
  -8   9   4   12.57   14.39
   7  -9  -4   17.08   16.37
   2   7  -4   -1.77    9.10
  -9   2  -4   -2.74   11.82
   7  -9  -4  -27.87   14.21
   7  -9  -4   -1.88    9.33
   2   7  -4    2.32    8.96
  -9   2  -4    0.39   15.28
  -9   2  -4    8.87   10.29
  -2  -7   4   -5.74    9.41
  -2  -7   4    9.53    9.49
   9  -2   4    1.03   15.61
  -7   9   4   -9.94   12.11
  -7   9   4  -12.74   15.45
  -7   9   4   -0.34   14.41
   9  -2   4  -15.99    9.34
   3   6  -4   13.75   16.01
   6  -9  -4  -15.65   14.51
  -9   3  -4   -1.95   15.33
   6  -9  -4  -11.55   10.05
   6  -9  -4    0.66   13.33
   3   6  -4   14.42    8.96
  -9   3  -4   12.18   11.64
  -6   9   4  -15.99   12.51
  -6   9   4    6.91   15.32
   9  -3   4  -13.42   15.19
   9  -3   4    2.81   10.31
  -3  -6   4    5.38    9.17
  -3  -6   4   17.64    8.59
   9  -3   4   -0.67   10.56
  -6   9   4    7.79   12.97
  -9   4  -4   29.24   13.03
   4   5  -4   31.90    8.67
   5  -9  -4   36.86   17.08
   4   5  -4   42.31    9.78
  -9   4  -4   32.56   17.97
   5  -9  -4   54.04   15.46
   5  -9  -4   30.72   14.72
   4   5  -4   45.21    8.51
   4   5  -4   33.34    7.93
  -9   4  -4   44.79   13.80
  -5   9   4   44.01   13.93
  -4  -5   4   16.89    9.42
  -5   9   4   24.65   16.57
   9  -4   4   50.98   13.47
   9  -4   4   18.01   17.49
  -4  -5   4   36.20    9.41
   9  -4   4   34.12   13.34
  -5   9   4   35.98   13.31
  -9   5  -4   31.40   13.96
   5   4  -4   41.31    8.47
  -9   5  -4   25.07   18.37
  -9   5  -4   21.07   10.41
   4  -9  -4   37.05   14.83
   5   4  -4   26.73    9.88
   4  -9  -4   32.25   18.22
   4  -9  -4   16.14   12.61
  -4   9   4   38.21   15.62
  -5  -4   4   25.29    8.26
  -4   9   4   38.94   12.27
  -5  -4   4   24.45    8.59
   9  -5   4   30.89   13.55
   9  -5   4   29.79   17.78
   9  -5   4   31.27   14.32
  -4   9   4   23.85   14.42
  -9   6  -4   12.26   13.45
   3  -9  -4  -12.38    9.70
   6   3  -4   -1.59    7.15
   6   3  -4   19.11    7.00
  -9   6  -4    7.73   17.04
   3  -9  -4    5.04   10.69
   3  -9  -4    0.76   14.69
   6   3  -4    5.23    9.92
  -9   6  -4    8.23   13.81
  -6  -3   4    8.49    6.94
  -3   9   4  -17.17    8.93
  -3   9   4    6.71    9.04
  -3   9   4    1.88   12.14
   9  -6   4   -2.65   18.95
   9  -6   4   -1.41   12.84
  -6  -3   4   13.57    7.22
   9  -6   4   -9.33   11.03
   2  -9  -4   24.16   15.17
  -9   7  -4   12.39   17.02
   7   2  -4   -2.90    6.37
  -9   7  -4   -0.87   13.63
  -9   7  -4    1.10   13.13
   7   2  -4  -14.04   10.92
   7   2  -4    4.63    7.89
   2  -9  -4    9.56   11.93
   2  -9  -4    4.91    7.46
   9  -7   4   15.61   13.37
   9  -7   4  -29.44   15.94
  -2   9   4   -6.05   12.52
   9  -7   4   -2.14   11.34
  -7  -2   4    4.00    7.27
  -2   9   4   -1.49   12.47
  -9   8  -4   13.93   10.98
   8   1  -4   13.16    7.94
   8   1  -4   11.42    7.38
   1  -9  -4    6.17   14.29
  -9   8  -4    6.91   14.74
   1  -9  -4   -0.12   13.98
   8   1  -4   10.78   13.87
  -9   8  -4   26.12   19.13
  -8  -1   4    1.51    7.55
  -8  -1   4   20.54   12.52
  -1   9   4   -5.71   12.36
  -1   9   4    0.53   12.58
   9  -8   4   16.68   19.61
   9  -8   4   14.45   14.77
   9  -8   4   29.65   16.55
   9   0  -4    8.41    8.02
  -9   9  -4   -1.71   14.62
  -9   9  -4   17.57   16.96
   9   0  -4    2.12    7.95
   9   0  -4  -22.14   14.60
   0  -9  -4   -7.03   12.53
  -9   9  -4   -9.36   17.52
   0  -9  -4    1.84   12.97
  -9   0   4   -0.47    8.01
  -9   0   4    4.45   14.08
  -9   0   4   20.32    9.66
   9  -9   4  -28.43   16.42
   0   9   4   10.41   14.14
   9  -9   4   -2.26   12.37
   9  -9   4    1.64   13.76
   0   9   4    7.28   11.79
  10  -1  -4  -16.32   16.83
  -9  10  -4    8.48   19.24
  -9  10  -4   17.06   17.63
  -1  -9  -4    9.43   13.82
   9 -10   4   15.88   14.53
 -10   1   4    8.76    9.52
 -10   1   4   13.61    8.66
 -10   1   4   27.77   16.47
   9 -10   4   41.98   20.81
  -2  -9  -4   -1.75   12.51
  -9  11  -4   -6.75   12.56
  -9  11  -4   28.29   19.77
 -11   2   4   -0.15    9.66
 -11   2   4   -1.14   15.95
 -11   2   4   24.87    9.62
   9 -11   4    3.78   16.83
  -9  12  -4    0.12   21.35
  -9  12  -4   11.31   18.67
  -3  -9  -4  -23.30   12.13
   9 -12   4   -4.22   17.55
 -12   3   4    6.95   11.15
 -12   3   4   -0.39   17.59
  -4  -9  -4  -15.83   12.55
  -9  13  -4   29.33   19.85
 -13   4   4    1.04   12.47
 -13   4   4   -0.86   18.68
   9 -13   4    3.79   19.14
  -9  14  -4   66.03   21.88
  -5  -9  -4   45.83   16.90
 -14   5   4   38.49   15.29
 -14   5   4   64.58   22.55
  -6  -9  -4    6.28   21.07
 -15   6   4   -8.05   18.16
 -15   6   4   19.18   21.83
 -10  -5  -4   20.18   16.79
 -15  10   4   -5.66   26.66
 -15  10   4   54.57   43.08
   5 -15   4   52.56   25.70
 -10  -4  -4   24.95   14.46
   4 -14   4   23.78   18.13
 -14  10   4    6.78   17.95
 -14  10   4   -0.52   22.67
 -10  -3  -4   15.63   13.62
 -13  10   4   58.47   23.75
   3 -13   4   31.68   18.97
 -13  10   4   -9.59   16.91
 -10  -2  -4   -7.92   11.38
 -12  10   4  -20.91   18.72
   2 -12   4   -6.77   14.74
 -12  10   4   -6.18   18.69
 -10  -1  -4   10.33   13.25
 -10  -1  -4   -2.71   11.13
 -11  10   4   25.54   27.26
 -11  10   4  -26.50   16.79
 -10   0  -4   83.89   15.79
 -10   0  -4  105.82   19.00
  10 -10  -4   82.67   20.32
 -10  10   4   59.87   18.03
 -10  10   4   70.38   22.54
   0 -10   4   60.07   16.20
   9 -10  -4    5.47   16.70
   9 -10  -4   32.75   20.76
 -10   1  -4    9.86   14.79
   9 -10  -4  -27.01   20.82
 -10   1  -4   19.32   12.43
  -9  10   4   -6.65   16.56
  -1  -9   4    8.48   11.58
  10  -1   4    6.64   18.87
  -9  10   4   20.46   20.52
  -1  -9   4   11.43   13.91
   8 -10  -4    5.77   13.74
   8 -10  -4  -40.13   17.72
 -10   2  -4   -7.37   15.01
   8 -10  -4   16.24   15.30
 -10   2  -4    2.90   11.16
 -10   2  -4   -6.12   11.92
  -2  -8   4    8.23   10.08
  -2  -8   4    4.16   11.06
  -8  10   4    2.18   15.10
  -8  10   4    2.46   16.25
   7 -10  -4   18.38   13.26
   7 -10  -4   54.41   18.61
   7 -10  -4    0.00   17.26
   3   7  -4   30.69   11.82
   3   7  -4   24.59   10.79
 -10   3  -4   38.30   13.12
 -10   3  -4   38.52   17.71
 -10   3  -4   41.22   14.54
  10  -3   4   52.59   15.44
  10  -3   4   30.56   12.59
  10  -3   4    2.28   17.69
  -7  10   4   47.19   17.84
  -7  10   4   36.87   17.08
  -7  10   4   10.61   15.36
  -3  -7   4   27.86   10.33
  -3  -7   4   20.76   11.09
 -10   4  -4   16.95   13.80
   6 -10  -4   19.03   11.02
   4   6  -4    8.48   10.29
   6 -10  -4  -27.29   14.00
 -10   4  -4   13.72   17.17
   4   6  -4   -8.48    8.56
   6 -10  -4    1.12   15.57
  10  -4   4   10.76   18.30
  -4  -6   4   12.01    9.22
  10  -4   4    9.12   12.78
  -6  10   4    9.29   12.79
  -6  10   4   -1.59   13.03
  -4  -6   4   12.67    9.84
  10  -4   4   -0.12   17.13
 -10   5  -4    5.60   17.12
 -10   5  -4    1.66   12.07
   5 -10  -4    5.96   15.60
   5   5  -4    4.02    8.24
   5   5  -4   -3.72    7.33
   5   5  -4   -4.43    7.64
   5 -10  -4   -5.45   13.42
 -10   5  -4   -6.67   13.12
   5   5  -4   -8.52    7.61
   5 -10  -4  -10.16   13.22
  10  -5   4  -13.90   17.85
  -5  10   4   -0.11   16.78
  10  -5   4   -5.47   11.87
  -5  -5   4   -5.62    8.72
  -5  10   4   25.42   13.93
  10  -5   4  -11.59   12.73
  -5  10   4   -0.60   12.98
  -5  -5   4   -3.39    7.79
 -10   6  -4   18.66   11.88
 -10   6  -4   -3.81   17.80
   4 -10  -4   16.84   13.44
   6   4  -4   -8.21    9.41
   4 -10  -4   -1.41   13.33
 -10   6  -4   19.96   15.14
   6   4  -4   13.05    7.91
   4 -10  -4    5.64   14.99
   6   4  -4   20.49    8.06
  10  -6   4  -14.81   19.04
  -4  10   4   15.80   10.87
  -4  10   4    2.40   15.62
  -4  10   4   26.57   16.41
  10  -6   4   23.05   14.97
  -6  -4   4   13.85    7.99
   3 -10  -4   13.27   12.36
   3 -10  -4   26.23   10.31
   3 -10  -4   14.16   15.60
 -10   7  -4   28.68   19.55
 -10   7  -4   13.60   15.73
   7   3  -4    4.39   12.01
   7   3  -4   20.19    8.22
 -10   7  -4   16.21   14.89
   7   3  -4   31.65    7.74
  10  -7   4   14.89   12.53
  -7  -3   4   30.59    8.39
  -3  10   4   32.39   12.43
  10  -7   4   19.00   20.31
  -7  -3   4   23.00    8.36
  10  -7   4   25.03   13.61
   8   2  -4   -0.17    7.36
   2 -10  -4    8.29   15.20
   8   2  -4  -35.82   11.69
 -10   8  -4   19.98   17.07
 -10   8  -4   -1.29   18.83
  -2  10   4  -26.68   16.71
  -2  10   4  -14.55   12.56
  -8  -2   4    1.07    7.84
  -8  -2   4   11.24    7.90
  10  -8   4   10.50   15.44
  10  -8   4    0.76   12.85
 -10   9  -4   23.90   20.29
 -10   9  -4   32.33   20.47
   1 -10  -4   36.11   16.31
   9   1  -4  -23.94   14.63
  -9  -1   4   16.64    8.51
  -1  10   4    7.20   13.27
  -9  -1   4    8.52    7.79
  10  -9   4  -15.69   14.71
  10  -9   4   12.22   12.78
  -9  -1   4   23.64   14.17
 -10  10  -4   82.56   23.31
   0 -10  -4   78.61   17.62
 -10  10  -4   76.00   23.13
 -10   0   4   68.96   17.70
  10 -10   4   83.63   21.44
 -10   0   4   70.18   11.91
 -10   0   4   75.12   10.84
 -10  11  -4   19.79   20.64
 -10  11  -4   40.65   25.83
  -1 -10  -4  -11.34   14.36
 -11   1   4   -4.08    8.09
 -11   1   4   19.11   15.98
  10 -11   4   24.45   20.40
 -10  12  -4    6.12   17.98
  -2 -10  -4    5.38   14.98
 -12   2   4  -11.52   16.43
 -12   2   4    3.38   10.23
  -3 -10  -4   -6.20   14.10
 -10  13  -4   36.95   20.86
 -13   3   4   12.16   11.73
 -13   3   4   19.35   19.47
 -10  14  -4   32.74   19.99
  -4 -10  -4  -11.40   13.68
 -14   4   4    0.15   18.95
 -14   4   4   -0.01   13.12
  -5 -10  -4   42.40   21.41
 -15   5   4   50.78   23.17
 -15   5   4   -1.17   21.29
 -11  -4  -4   -2.41   14.42
 -15  11   4   31.49   27.61
 -15  11   4   17.81   27.43
 -11  -3  -4    2.06   14.18
 -14  11   4  -17.05   22.82
 -14  11   4  -18.78   18.56
   3 -14   4  -18.66   17.50
 -11  -2  -4    8.52   13.01
   2 -13   4   14.97   16.94
 -13  11   4  -11.78   21.37
 -13  11   4    4.92   22.45
 -11  -1  -4   28.80   14.35
   1 -12   4   11.34   15.20
 -12  11   4    3.46   19.22
 -12  11   4   42.87   23.67
 -11   0  -4   34.66   16.34
 -11   0  -4   11.65   12.80
 -11  11   4   26.71   20.93
 -11  11   4   11.15   16.25
   0 -11   4   12.44   14.54
 -11   1  -4   32.50   13.94
 -11   1  -4    2.23   14.92
 -10  11   4  -24.90   17.21
 -10  11   4  -12.02   19.63
  -1 -10   4   25.44   13.32
 -11   2  -4   12.91   16.36
 -11   2  -4    3.73   12.92
  -2  -9   4    1.25   11.35
  -9  11   4   34.22   22.50
  -9  11   4    2.39   16.88
  11  -2   4  -16.50   20.14
   8 -11  -4   62.95   22.89
   8 -11  -4  125.55   22.86
 -11   3  -4  171.49   20.80
 -11   3  -4  168.03   24.61
  -8  11   4  159.88   23.43
  -3  -8   4  117.30   16.35
  -8  11   4  119.08   22.11
  -3  -8   4  167.84   19.25
   7 -11  -4    4.36   17.67
   7 -11  -4  -39.56   16.18
 -11   4  -4    5.85   17.12
 -11   4  -4  -13.33   12.20
  -4  -7   4    7.81    9.93
  -4  -7   4    9.93   11.20
  -7  11   4   10.78   16.07
  -7  11   4   18.72   15.50
   6 -11  -4   25.48   17.69
   6 -11  -4  -29.87   14.53
 -11   5  -4    9.28   14.88
 -11   5  -4   30.82   18.89
  -6  11   4   38.03   20.51
  -5  -6   4    2.63    8.65
  -6  11   4   16.87   13.58
  -6  11   4    5.26   13.73
   5 -11  -4    6.87   14.44
 -11   6  -4   43.34   16.52
 -11   6  -4    3.89   18.45
  -6  -5   4   18.39   10.12
  -6  -5   4   11.08    8.58
  -5  11   4   14.55   19.05
  -5  11   4   27.37   13.42
  -5  11   4   16.25   13.87
   4 -11  -4   41.64   19.05
 -11   7  -4   -7.48   18.42
 -11   7  -4   -0.06   15.25
  -4  11   4   13.88   15.72
  11  -7   4   -3.28   14.75
  -7  -4   4    1.52    9.07
  -4  11   4   14.71   16.62
  -7  -4   4    7.99    7.61
  -4  11   4   13.84   10.19
   3 -11  -4  124.38   20.91
 -11   8  -4  158.73   27.26
 -11   8  -4  108.28   23.58
  -3  11   4  147.35   25.57
  -8  -3   4  158.85   15.10
  11  -8   4  138.05   20.90
   2 -11  -4   -2.66   15.56
 -11   9  -4   15.09   20.25
 -11   9  -4   21.92   17.80
  11  -9   4    8.56   16.72
 -11  10  -4  -25.64   18.57
   1 -11  -4    0.71   15.51
   0 -11  -4   10.43   16.47
 -11  11  -4   29.20   20.20
 -11  11  -4    1.69   14.00
 -11   0   4   -2.94    8.28
 -11   0   4   17.05    9.43
 -11   0   4   20.14   15.55
  -1 -11  -4    0.49   14.97
 -11  12  -4   21.66   22.18
 -11  12  -4   76.76   23.41
 -12   1   4   24.03   10.94
 -12   1   4   29.62   17.98
 -11  13  -4    3.51   20.03
  -2 -11  -4   -4.74   15.38
 -13   2   4   37.51   19.24
 -13   2   4   12.43   11.15
  -3 -11  -4    0.57   15.90
 -11  14  -4   10.11   19.96
 -14   3   4    2.60   12.23
 -14   3   4   21.70   20.04
  -4 -11  -4   -1.59   16.09
 -15   4   4  -11.39   19.19
 -15   4   4  -10.04   12.44
 -14  12   4  -19.18   19.36
 -14  12   4   -3.84   25.76
   2 -14   4    4.67   19.66
 -12  -1  -4   25.14   15.24
 -13  12   4   70.42   27.55
   1 -13   4    9.14   17.52
 -13  12   4   -3.76   18.04
 -12   0  -4   22.09   14.47
   0 -12   4   12.38   16.20
 -12  12   4   13.36   23.19
 -12  12   4   35.65   21.39
 -12   1  -4   29.17   15.48
 -12   1  -4   46.62   18.49
 -11  12   4   67.11   24.05
  -1 -11   4    9.62   13.83
 -11  12   4   -5.07   21.77
 -12   2  -4  -11.58   15.95
 -12   2  -4   -4.51   12.89
 -10  12   4    4.61   20.11
  -2 -10   4  -13.89   11.46
 -10  12   4   -9.26   20.49
 -12   3  -4   -4.49   12.54
 -12   3  -4   18.32   18.11
  -3  -9   4   -0.98   10.96
  -9  12   4  -11.27   18.44
  -9  12   4   -5.34   16.17
 -12   4  -4    2.46   18.06
   8 -12  -4  -13.16   15.82
 -12   4  -4  -12.11   23.21
  -4  -8   4    0.81   10.43
  -8  12   4   11.42   16.77
  -8  12   4   12.95   15.24
 -12   5  -4   31.83   15.27
 -12   5  -4   -3.12   17.76
   7 -12  -4   -5.05   19.72
  -7  12   4    2.78   17.00
  -7  12   4   30.06   16.16
  -5  -7   4  -13.07   11.36
   6 -12  -4   -5.87   16.44
 -12   6  -4  -34.03   16.44
 -12   6  -4    7.05   15.27
  -6  -6   4   -6.16   10.60
  -6  -6   4   -6.61    8.52
  -6  12   4   -2.36   13.84
  -6  12   4   16.99   22.98
   5 -12  -4   10.06   17.91
 -12   7  -4  -33.69   16.32
  -7  -5   4   -2.93    9.42
  -7  -5   4   -2.84    7.99
 -12   8  -4  -10.55   18.63
 -12   8  -4    9.32   16.88
   4 -12  -4    4.26   16.26
   3 -12  -4   41.66   19.10
 -12   9  -4    2.83   16.05
 -12   9  -4    7.11   20.09
 -12  10  -4   -4.41   19.24
   2 -12  -4   -1.28   31.67
 -12  10  -4   15.81   20.40
   1 -12  -4   31.05   17.96
 -12  11  -4    2.52   26.26
 -12  11  -4   40.06   22.08
   0 -12  -4    4.44   15.94
 -12  12  -4   32.03   23.25
 -12  12  -4   26.40   24.47
  -1 -12  -4   12.34   17.14
 -12  13  -4   33.49   22.16
 -13   1   4   45.20   23.73
  -2 -12  -4   11.87   18.13
 -12  14  -4    6.13   19.49
 -13  -1  -4    6.05   15.97
 -14  13   4  -24.21   20.08
   1 -14   4  -21.00   16.48
 -14  13   4   17.16   26.11
 -13   0  -4   36.17   16.55
 -13  13   4   -8.37   21.73
 -13  13   4   24.33   25.79
   0 -13   4    3.43   17.32
 -13   1  -4   22.05   15.34
 -12  13   4   49.11   25.77
  -1 -12   4    3.23   15.68
 -12  13   4   -3.19   23.79
 -13   2  -4   -3.69   14.59
 -13   2  -4    1.94   17.64
 -11  13   4   29.81   22.54
 -11  13   4  -19.07   25.01
  -2 -11   4   -8.49   12.40
 -13   3  -4   12.36   17.63
 -13   3  -4   -6.93   14.57
 -10  13   4   -6.48   18.17
 -10  13   4    4.00   18.72
  -3 -10   4  -13.25   11.88
 -13   4  -4    6.85   14.61
 -13   4  -4   -2.98   17.49
  -4  -9   4   -2.92   11.24
  -9  13   4   -6.27   20.52
  -9  13   4   -2.16   17.88
 -13   5  -4   15.42   18.81
 -13   5  -4  -15.18   13.93
  -8  13   4   16.65   17.28
  -5  -8   4   -8.95   10.17
   7 -13  -4   36.10   24.84
 -13   6  -4    0.08   15.76
 -13   6  -4   49.25   21.80
  -6  -7   4   33.43   10.68
 -13   7  -4   24.76   18.79
 -13   7  -4   66.84   22.68
   6 -13  -4   20.14   18.83
  -7  -6   4   42.91   12.32
 -13   8  -4   -1.00   19.07
   5 -13  -4   12.42   22.26
 -13   8  -4   16.30   21.48
 -13   9  -4   30.83   21.94
   4 -13  -4   10.58   24.52
 -13   9  -4   -1.98   20.57
   3 -13  -4   17.85   19.23
 -13  10  -4  -19.52   17.60
 -13  10  -4   30.42   22.83
   2 -13  -4   -5.43   19.77
 -13  11  -4   15.04   20.72
 -13  11  -4   -9.99   15.41
 -13  12  -4   48.97   26.00
   1 -13  -4   -2.27   17.33
 -13  12  -4   21.73   22.81
 -13  13  -4   34.25   22.07
   0 -13  -4  -12.82   17.01
  -1 -13  -4   15.68   19.72
 -14   1  -4  -25.42   15.44
  -1 -13   4   -5.36   16.69
 -13  14   4   35.82   37.86
 -12  14   4   46.42   25.96
 -14   3  -4   26.20   19.77
  -3 -11   4   -6.43   13.75
 -11  14   4   60.03   24.01
 -14   4  -4    7.03   17.01
 -14   4  -4   35.93   19.86
  -4 -10   4    3.42   13.34
 -10  14   4   10.74   18.58
 -14   5  -4   38.72   21.36
 -14   5  -4   40.17   17.88
  -5  -9   4   35.43   12.87
 -14   6  -4   15.66   20.55
 -14   6  -4   29.26   17.76
  -6  -8   4   16.43   10.76
 -14   7  -4   43.16   22.15
 -14   7  -4   18.98   18.70
 -14   8  -4   35.74   22.27
 -14   8  -4    1.63   18.47
   6 -14  -4    7.73   21.91
 -14   9  -4   84.37   25.39
   5 -14  -4   82.02   25.92
 -14   9  -4   77.84   23.71
 -14  10  -4   33.84   21.84
   4 -14  -4   19.81   21.91
 -14  10  -4   16.79   21.46
 -14  11  -4   17.93   21.82
 -14  11  -4  -28.25   24.09
   3 -14  -4  -16.38   18.74
 -14  12  -4   40.49   25.21
   2 -14  -4    7.25   18.62
 -14  12  -4  -14.35   18.20
   1 -14  -4  -24.96   17.22
 -14  13  -4   29.15   22.47
 -15   4  -4   12.81   20.03
 -15   4  -4   -4.79   15.12
  -4 -11   4    1.09   14.22
 -15   5  -4   55.48   22.23
 -15   5  -4   59.87   22.52
 -15   6  -4  -14.06   16.52
 -15   6  -4   -0.22   19.93
  -6  -9   4   -4.72   10.73
 -15   7  -4   39.74   22.99
 -15   7  -4   -6.87   18.13
 -15   8  -4   63.00   24.79
 -15   8  -4   15.41   21.00
 -15   9  -4    1.83   19.49
 -15   9  -4   16.35   25.52
 -15  10  -4   14.48   33.62
   5 -15  -4   29.35   22.81
 -15  10  -4   22.25   24.28
 -15  11  -4   -8.69   25.27
 -15  11  -4   49.89   24.87
   4 -15  -4  -26.45   20.20
   0   0  -5   -1.66    6.98
   0   0  -5   -8.76    5.24
   0   0  -5   11.40    5.33
   0   0   5  -15.16    6.81
   0   0   5    6.53    6.44
   0   1  -5   27.99    6.01
   1  -1  -5   22.20    6.65
   1  -1  -5   15.89    7.05
  -1   0  -5   16.12    8.02
  -1   0  -5   18.68    8.25
   0   1  -5   34.29    8.01
  -1   0  -5   25.89    7.99
   0   1  -5   17.13    5.39
  -1   1   5    8.84    6.04
   1   0   5   25.26    8.38
   0  -1   5   19.88    6.04
   1   0   5   29.44    8.75
   0  -1   5    9.20    6.11
   1   0   5   13.34    7.83
   0  -1   5   17.76    6.93
   1   0  -5   12.91    4.65
   0  -1  -5   34.18    7.84
   0  -1  -5   19.20    7.81
  -1   1  -5   13.53    8.46
  -1   1  -5   23.98    6.36
   0  -1  -5    6.00    5.87
  -1   1  -5    8.25    6.56
   1   0  -5   20.72    4.77
  -1   0   5   13.43    5.10
   1  -1   5   19.68    9.21
   0   1   5   15.24    7.21
  -1   0   5   18.03    4.82
   1  -1   5   18.22    6.66
   0   1   5    9.25    7.65
   1  -1   5   20.37    7.87
   2  -1  -5   -1.78    5.53
   2  -1  -5    2.19    5.90
  -1  -1  -5    1.62    7.64
  -1   2  -5    9.09    8.24
   2  -1  -5    4.12    8.51
  -1   2  -5    7.19    9.61
  -1   2  -5   -7.04    7.51
  -1  -1  -5   -0.07    7.21
  -1  -1  -5    5.34    8.05
   1   1   5  -13.78    8.12
   1  -2   5   13.18    8.67
   1   1   5    7.13    6.36
   1  -2   5   -7.80    6.46
  -2   1   5   -4.10    5.68
   1   1   5   -4.73    8.08
  -2   1   5   -5.83    9.24
  -1   3  -5 3831.61  230.13
  -2  -1  -5 3677.60  230.04
  -2  -1  -5 3867.53  229.51
   3  -2  -5 3845.40  229.30
   3  -2  -5 3897.15  230.96
  -2  -1  -5 3730.28  229.96
   3  -2  -5 3979.86  229.42
  -1   3  -5 3724.77  229.61
  -1   3  -5 4079.16  230.67
   1  -3   5 3785.93  230.02
  -3   2   5 3844.90  229.34
  -3   2   5 3759.89  230.90
   2   1   5 3871.07  229.43
  -3   2   5 3885.57  229.44
   2   1   5 3785.06  230.10
   1  -3   5 3699.17  229.59
   2  -2  -5  755.61   48.29
  -2   0  -5  740.96   47.56
   0   2  -5  714.78   47.36
   0   2  -5  736.76   46.03
   0   2  -5  728.31   45.96
  -2   0  -5  750.54   47.99
   2  -2  -5  780.98   46.93
  -2   0  -5  750.22   47.64
   2  -2  -5  730.36   47.30
   2   0   5  752.86   47.49
   2   0   5  751.92   47.67
   2   0   5  725.09   47.40
   0  -2   5  739.38   46.07
   0  -2   5  733.59   46.18
  -2   2   5  721.22   48.35
   0  -2   5  677.31   47.20
  -2   2   5  750.69   47.04
  -2   1  -5   25.82   10.49
   1  -2  -5  -13.12    7.33
  -2   1  -5    8.87    8.14
   1   1  -5  -21.43    7.36
   1   1  -5    4.74    3.99
   1  -2  -5   -3.12    8.23
   1   1  -5   -0.39    4.25
  -2   1  -5   -4.42    6.52
   1  -2  -5   -4.98    7.23
  -1   2   5   21.66    7.23
  -1   2   5    1.98    7.43
   2  -1   5   -4.50    7.84
  -1  -1   5   -1.26    4.29
  -1  -1   5    7.73    4.25
   2  -1   5    0.63    8.85
   2  -1   5   14.51    6.62
   2   0  -5  726.17   47.61
  -2   2  -5  701.71   48.24
   0  -2  -5  771.24   47.46
   0  -2  -5  716.19   46.13
  -2   2  -5  760.69   47.19
  -2   2  -5  714.31   47.07
   0  -2  -5  710.18   47.10
   2  -2   5  729.89   48.11
   0   2   5  711.56   47.20
   2  -2   5  738.33   47.11
   2  -2   5  769.02   47.25
   3  -1  -5 3866.46  228.87
  -2   3  -5 3802.14  230.86
   3  -1  -5 3950.11  231.21
  -2   3  -5 3827.00  230.45
  -1  -2  -5 3926.71  230.56
  -2   3  -5 3713.19  230.38
   3  -1  -5 3871.21  228.89
  -1  -2  -5 3808.29  229.22
  -1  -2  -5 3672.66  230.36
  -3   1   5 3914.85  228.95
   2  -3   5 3845.66  230.48
   1   2   5 3845.47  230.59
   1   2   5 3763.85  229.15
   1   2   5 3933.03  230.57
   2  -3   5 3829.29  230.51
  -3   1   5 3872.96  231.19
  -3   1   5 3810.50  228.84
   2  -3   5 3771.38  230.82
  -2  -2  -5    0.79    8.76
  -2   4  -5   -0.66    8.20
   4  -2  -5    2.48   10.65
  -2   4  -5    4.19    9.44
   4  -2  -5   11.12    6.34
  -2  -2  -5    2.88    8.47
   4  -2  -5    0.92    6.51
  -2   4  -5    9.95    8.75
  -2  -2  -5    0.92    6.33
   2   2   5    1.85    6.94
  -4   2   5   -0.98    6.41
   2   2   5    2.65    8.13
   2  -4   5    7.64    8.98
   2  -4   5   12.22    8.13
  -4   2   5    7.50   10.44
   2   2   5   -4.34    5.49
  -4   2   5   10.86    6.89
   2  -4   5   -0.34    8.94
  -2   5  -5  463.19   32.78
  -2   5  -5  412.89   33.05
  -2   5  -5  400.92   32.29
  -3  -2  -5  455.63   31.00
  -3  -2  -5  507.82   32.94
   5  -3  -5  436.15   31.50
  -3  -2  -5  478.04   31.97
   5  -3  -5  435.68   35.36
   5  -3  -5  439.26   31.16
   3   2   5  444.79   30.28
  -5   3   5  465.82   35.72
  -5   3   5  438.28   31.83
   2  -5   5  483.47   33.63
  -5   3   5  441.80   31.47
   2  -5   5  410.33   32.22
   3   2   5  435.90   32.43
   2  -5   5  494.14   32.81
   3   2   5  477.79   32.87
  -1   4  -5  126.89   13.24
  -3  -1  -5  127.36   12.83
  -1   4  -5  101.20   11.95
   4  -3  -5  132.18   15.69
   4  -3  -5   90.73   11.28
  -1   4  -5  122.92   12.56
   4  -3  -5  113.20   11.98
  -3  -1  -5  123.96   13.25
  -4   3   5  104.95   11.86
   1  -4   5  132.80   13.62
  -4   3   5  103.93   11.69
   3   1   5   91.51   11.47
   1  -4   5  140.47   13.97
   1  -4   5  121.70   13.05
   3   1   5  168.94   15.88
  -4   3   5  138.31   15.82
   3   1   5  102.27   12.18
   0   3  -5 1242.72   77.90
   3  -3  -5 1276.56   79.53
   0   3  -5 1322.14   77.50
  -3   0  -5 1250.76   78.78
  -3   0  -5 1301.54   78.73
  -3   0  -5 1244.64   78.66
   3  -3  -5 1200.15   78.19
   0   3  -5 1280.01   77.44
   3  -3  -5 1355.53   78.55
   3   0   5 1289.41   78.80
  -3   3   5 1236.61   79.68
   0  -3   5 1250.31   77.51
  -3   3   5 1290.93   78.56
   0  -3   5 1183.55   77.75
   3   0   5 1288.95   78.63
   3   0   5 1261.65   78.60
   0  -3   5 1200.81   77.36
   1   2  -5 3799.35  227.50
   1   2  -5 3936.11  226.18
   1   2  -5 3988.22  226.19
   2  -3  -5 3671.80  227.90
  -3   1  -5 3961.81  228.15
  -3   1  -5 3525.18  227.81
  -3   1  -5 3748.55  228.38
   2  -3  -5 3750.72  228.08
   3  -1   5 3982.11  228.17
  -1  -2   5 3818.15  226.18
  -2   3   5 3791.40  228.07
   3  -1   5 3714.52  228.35
  -2   3   5 3734.33  227.89
  -1  -2   5 3843.91  226.19
   3  -1   5 3662.48  227.94
  -2   3   5 3723.37  228.05
   2   1  -5 3816.55  228.13
   1  -3  -5 4012.44  228.68
   1  -3  -5 3648.64  228.41
  -3   2  -5 3640.04  228.88
  -3   2  -5 3797.57  228.45
   1  -3  -5 3758.29  227.65
  -3   2  -5 3896.00  228.52
  -1   3   5 3916.47  228.50
   3  -2   5 3746.14  228.96
   3  -2   5 3737.99  228.39
   3  -2   5 3809.87  228.50
   0  -3  -5 1291.16   79.99
   0  -3  -5 1207.20   77.97
  -3   3  -5 1319.25   80.09
   0  -3  -5 1266.42   79.99
   3   0  -5 1284.95   80.19
   0  -3  -5 1284.13   78.09
  -3   3  -5 1297.03   80.13
  -3   0   5 1260.78   80.40
   0   3   5 1289.85   79.98
   3  -3   5 1262.45   80.70
   3  -3   5 1309.79   80.20
   3  -3   5 1299.35   80.19
   0   3   5 1300.32   79.90
  -3   4  -5  139.67   15.48
  -3   4  -5  102.68   12.77
   4  -1  -5  127.47   11.91
  -1  -3  -5  144.92   14.96
  -1  -3  -5  113.99   11.85
  -3   4  -5  146.00   17.25
  -1  -3  -5  142.88   15.12
   4  -1  -5  142.33   16.25
   4  -1  -5  122.20   11.78
   1   3   5  122.48   14.18
  -4   1   5  132.61   16.14
   3  -4   5  130.49   13.74
   3  -4   5  153.60   16.50
  -4   1   5  110.83   11.97
  -4   1   5  123.90   12.21
   3  -4   5  119.84   14.74
   1   3   5  137.66   14.19
  -3   5  -5  466.37   34.75
  -3   5  -5  467.66   33.62
   5  -2  -5  454.40   35.12
   5  -2  -5  459.52   30.74
   5  -2  -5  434.24   30.30
  -3   5  -5  434.05   33.19
  -2  -3  -5  446.12   32.89
  -2  -3  -5  473.86   33.14
  -2  -3  -5  464.53   29.34
  -5   2   5  445.27   30.78
  -5   2   5  486.24   35.97
   2   3   5  440.75   28.96
   3  -5   5  457.34   33.91
  -5   2   5  418.07   30.49
   3  -5   5  414.87   33.94
   2   3   5  450.81   33.16
   2   3   5  460.32   32.74
   3  -5   5  495.29   34.03
  -3   6  -5    2.12   10.82
  -3  -3  -5   -2.65    7.26
  -3  -3  -5   -0.39    9.43
   6  -3  -5   -3.54    8.26
   6  -3  -5   -4.81   11.64
  -3   6  -5   -8.34    9.24
   6  -3  -5   -7.25    6.64
  -3  -3  -5   -5.10    6.27
  -3   6  -5    4.45    9.19
  -6   3   5  -11.81    7.80
   3   3   5   -3.10    5.43
  -6   3   5  -17.89   10.93
   3   3   5  -12.84    8.58
  -6   3   5  -10.86    7.01
   3  -6   5   -3.44    9.98
   3   3   5    5.82    9.85
   3  -6   5   -8.52    9.52
   3  -6   5    7.81    8.78
  -4  -3  -5 1289.44   76.57
  -4  -3  -5 1207.23   73.70
  -3   7  -5 1114.40   76.47
   7  -4  -5 1191.46   75.46
  -3   7  -5 1082.34   76.73
   7  -4  -5 1190.56   75.64
  -3   7  -5 1157.33   77.07
   7  -4  -5 1178.64   79.93
  -7   4   5 1211.87   75.89
   4   3   5 1153.44   75.97
   3  -7   5 1274.74   78.03
   3  -7   5 1176.13   76.51
  -7   4   5 1223.39   79.91
   4   3   5 1201.54   76.48
   4   3   5 1236.82   73.51
  -7   4   5 1170.23   75.38
   3  -7   5 1137.56   77.00
  -2   6  -5   22.57   10.26
  -4  -2  -5   24.08    8.61
   6  -4  -5   -5.98    7.95
  -2   6  -5    4.64    8.70
  -4  -2  -5   22.93    9.53
  -2   6  -5   12.01   10.39
   6  -4  -5  -23.36   11.70
   6  -4  -5    8.29    9.27
   4   2   5   -7.50    7.39
   2  -6   5    5.32    9.78
   2  -6   5    1.35    6.33
  -6   4   5    5.94   12.73
   4   2   5    6.55    7.52
   4   2   5    5.41    8.20
  -6   4   5   11.25   10.07
   2  -6   5    0.55    8.54
  -6   4   5   -3.32    7.44
  -1   5  -5  810.71   50.69
  -1   5  -5  754.55   50.53
  -1   5  -5  775.17   50.21
  -4  -1  -5  814.93   51.24
   5  -4  -5  782.70   50.87
  -4  -1  -5  742.16   50.79
   5  -4  -5  763.45   53.62
  -5   4   5  770.47   53.41
   1  -5   5  789.32   51.09
   1  -5   5  781.25   50.77
   4   1   5  852.06   51.40
  -5   4   5  780.91   51.09
   1  -5   5  737.27   50.09
   4   1   5  722.26   50.20
   4   1   5  760.29   50.90
   0   4  -5  154.90   16.47
   4  -4  -5  191.39   18.45
   4  -4  -5  223.73   19.20
  -4   0  -5  189.21   18.67
   4  -4  -5  167.03   19.15
  -4   0  -5  187.02   18.17
  -4   0  -5  180.10   18.68
   0   4  -5  192.45   16.80
   0   4  -5  191.79   16.82
   4   0   5  183.61   19.32
  -4   4   5  221.26   21.74
   0  -4   5  180.50   17.31
   0  -4   5  155.01   16.43
   0  -4   5  182.49   17.01
   4   0   5  212.17   19.21
   4   0   5  171.74   18.34
  -4   4   5  174.45   18.62
  -4   4   5  192.95   18.78
   1   3  -5  116.71   12.02
  -4   1  -5  114.42   15.36
   1   3  -5  132.94   14.14
   3  -4  -5  103.09   12.06
   1   3  -5  129.26   12.01
   3  -4  -5  114.37   14.64
   3  -4  -5  107.49   13.07
  -4   1  -5  130.58   13.74
   4  -1   5  120.11   14.66
  -3   4   5  124.76   15.03
   4  -1   5  107.07   12.08
  -1  -3   5  123.83   12.59
  -3   4   5  153.90   16.09
   4  -1   5  123.62   13.17
  -1  -3   5  112.87   11.12
   2  -4  -5    4.21    8.97
  -4   2  -5   13.55    7.68
   2   2  -5   11.08    7.82
  -4   2  -5   12.56   11.39
  -4   2  -5    6.29    7.20
   2  -4  -5    0.56    8.53
   2  -4  -5    6.92    8.81
  -2   4   5    3.08    8.29
   4  -2   5  -12.09    9.28
   4  -2   5   10.01   10.04
   4  -2   5    9.82    9.81
  -2   4   5   -0.25    6.48
  -2   4   5   -3.78    8.71
   1  -4  -5  139.75   14.42
  -4   3  -5  135.48   15.65
   1  -4  -5  152.06   15.92
  -4   3  -5  127.92   17.31
   1  -4  -5  132.39   15.40
   3   1  -5  114.92   13.26
  -4   3  -5  106.47   13.46
   4  -3   5  101.98   15.48
   4  -3   5  104.67   13.71
  -1   4   5  134.54   14.68
  -1   4   5  110.77   14.53
   4  -3   5  135.25   14.17
   4   0  -5  186.04   18.50
  -4   4  -5  211.59   19.52
   0  -4  -5  168.67   14.78
  -4   4  -5  143.47   18.78
  -4   4  -5  192.77   19.09
   0  -4  -5  227.85   20.35
   0  -4  -5  184.58   15.24
   0  -4  -5  195.97   19.81
   4  -4   5  217.33   20.10
   0   4   5  203.40   19.66
   4  -4   5  178.59   19.74
   4  -4   5  215.78   20.50
  -4   0   5  182.53   20.33
   0   4   5  215.36   20.40
   5  -1  -5  807.86   48.64
  -1  -4  -5  758.17   51.56
  -4   5  -5  787.77   52.34
  -1  -4  -5  768.30   47.46
  -1  -4  -5  772.18   47.42
  -4   5  -5  827.38   52.83
  -1  -4  -5  810.76   52.12
   5  -1  -5  786.64   48.52
  -4   5  -5  775.99   53.46
   5  -1  -5  758.19   52.77
  -5   1   5  754.22   53.42
   1   4   5  824.29   51.91
  -5   1   5  772.34   48.65
   4  -5   5  770.76   52.30
   1   4   5  770.82   51.54
  -5   1   5  802.63   48.63
   4  -5   5  722.39   53.06
   4  -5   5  752.13   52.49
  -4   6  -5   10.10   11.44
  -4   6  -5    1.31   11.62
  -4   6  -5   -4.09    8.36
   6  -2  -5   11.78    7.28
  -2  -4  -5    3.14    9.95
   6  -2  -5    9.94    6.86
   6  -2  -5   24.27   13.76
   4  -6   5    6.39   10.35
   4  -6   5   10.21   11.50
  -6   2   5   10.26    7.19
  -6   2   5  -26.35   11.01
   4  -6   5   -2.97   10.53
   2   4   5    7.72   10.16
   2   4   5   10.77   11.13
  -6   2   5    8.98    7.27
   7  -3  -5 1258.36   74.95
  -4   7  -5 1188.79   77.88
   7  -3  -5 1161.83   79.19
  -4   7  -5 1222.70   78.02
   7  -3  -5 1257.21   74.94
  -4   7  -5 1126.71   77.13
  -3  -4  -5 1205.35   76.48
  -7   3   5 1075.21   74.32
   4  -7   5 1129.58   77.36
   4  -7   5 1210.99   81.08
   3   4   5 1234.35   76.53
  -7   3   5 1183.31   74.79
  -7   3   5 1232.65   79.40
   4  -7   5 1169.36   77.93
   3   4   5 1158.06   76.33
  -4   8  -5   -3.52   13.08
  -4  -4  -5   10.69    9.73
   8  -4  -5   -7.03    9.58
   8  -4  -5   -7.22    8.02
  -4   8  -5   20.79   12.47
   8  -4  -5   -6.28   15.11
  -4  -4  -5   -6.34    4.87
  -4  -4  -5  -17.53    9.14
  -4   8  -5   -2.08    9.37
  -8   4   5   19.84   10.31
   4   4   5   -9.48    4.74
  -8   4   5   16.15   15.29
   4  -8   5   -1.38   13.21
  -8   4   5    8.51    8.97
   4  -8   5   21.73   12.39
   4   4   5   -2.25    8.54
   4   4   5    4.82   10.56
   4  -8   5  -27.23   12.29
   9  -5  -5  -11.21   10.81
  -4   9  -5  -11.44   12.23
   9  -5  -5   -4.91    9.37
  -4   9  -5  -19.33   12.47
  -4   9  -5    0.38   13.07
  -5  -4  -5   14.94   11.91
  -5  -4  -5    2.87    9.01
   9  -5  -5   16.20   15.68
  -5  -4  -5  -10.98    5.51
  -9   5   5    2.23   11.38
   5   4   5   -7.64    9.55
  -9   5   5   14.61    9.43
  -9   5   5   -9.17   13.96
   4  -9   5    1.10   12.45
   4  -9   5   -1.21   13.64
   5   4   5   -0.13    6.16
   5   4   5   10.10   10.96
   4  -9   5   -9.52   10.86
  -5  -3  -5  376.71   28.79
  -3   8  -5  421.97   33.45
   8  -5  -5  453.93   38.01
  -5  -3  -5  421.19   32.25
   8  -5  -5  349.71   31.19
   8  -5  -5  409.98   32.11
  -3   8  -5  385.11   32.93
  -5  -3  -5  401.90   31.42
  -3   8  -5  410.22   34.14
   5   3   5  372.42   31.57
  -8   5   5  406.43   31.49
  -8   5   5  398.59   32.36
   3  -8   5  386.79   32.23
   3  -8   5  373.68   33.01
   5   3   5  424.12   32.25
   3  -8   5  421.01   34.45
  -8   5   5  374.74   37.87
   5   3   5  378.16   28.51
  -2   7  -5 1209.23   75.64
   7  -5  -5 1113.38   77.75
   7  -5  -5 1145.23   74.99
   7  -5  -5 1187.16   74.99
  -5  -2  -5 1143.97   73.65
  -2   7  -5 1154.01   75.15
  -2   7  -5 1153.39   74.37
  -5  -2  -5 1221.79   75.11
  -5  -2  -5 1114.63   74.25
   5   2   5 1141.87   74.74
   5   2   5 1193.77   73.54
  -7   5   5 1086.10   78.00
   2  -7   5 1255.77   75.92
  -7   5   5 1103.80   74.80
  -7   5   5 1198.33   75.51
   2  -7   5 1125.13   73.93
   5   2   5 1226.25   75.06
   6  -5  -5  -10.02   12.61
  -1   6  -5    4.81    7.76
  -5  -1  -5    4.23    9.14
  -1   6  -5   -0.22    8.77
  -5  -1  -5    0.18   10.06
   6  -5  -5    0.16    8.34
  -1   6  -5   15.77    8.88
   6  -5  -5    7.62    9.88
   1  -6   5   23.76    9.98
   5   1   5  -12.02    8.86
   5   1   5   15.34    8.29
  -6   5   5    6.45    8.46
  -6   5   5   -5.88   13.02
   1  -6   5    4.27    7.93
  -6   5   5   14.47   10.05
   1  -6   5    2.52    8.45
   0   5  -5 5635.39  340.72
   0   5  -5 5572.48  340.52
   0   5  -5 5630.05  340.08
  -5   0  -5 5680.46  341.73
   5  -5  -5 5482.52  341.72
  -5   0  -5 5820.30  341.49
   5  -5  -5 5747.20  341.97
   0  -5   5 5664.88  340.06
   0  -5   5 5616.92  340.73
   5   0   5 5730.04  341.55
  -5   5   5 5801.34  341.83
   5   0   5 5794.78  343.39
  -5   5   5 5879.32  342.13
  -5   5   5 5662.02  343.00
   0  -5   5 5601.46  340.72
   5   0   5 5663.47  341.62
  -5   1  -5  851.97   51.53
   1   4  -5  752.06   49.17
   4  -5  -5  822.97   52.34
   4  -5  -5  748.01   52.64
   1   4  -5  769.97   49.12
   1   4  -5  731.70   49.13
  -5   1  -5  790.08   51.33
  -5   1  -5  762.34   53.04
   4  -5  -5  769.77   51.49
  -1  -4   5  783.49   49.16
  -1  -4   5  788.88   49.33
   5  -1   5  841.83   51.51
  -4   5   5  725.49   51.39
   5  -1   5  752.07   51.27
   5  -1   5  742.70   52.09
  -4   5   5  757.52   52.52
  -4   5   5  768.21   51.50
   3  -5  -5  439.28   33.54
   2   3  -5  448.01   29.26
  -5   2  -5  504.12   33.60
   2   3  -5  467.24   31.17
   3  -5  -5  394.66   33.03
  -5   2  -5  428.18   32.75
   2   3  -5  450.08   29.22
   3  -5  -5  472.50   34.41
   2   3  -5  448.19   31.20
  -5   2  -5  502.46   36.09
  -2  -3   5  468.67   29.41
  -3   5   5  413.85   33.24
  -2  -3   5  501.49   29.60
   5  -2   5  455.50   33.44
   5  -2   5  425.18   33.06
  -3   5   5  417.93   33.06
   5  -2   5  452.02   34.73
  -3   5   5  390.86   33.53
   2  -5  -5  488.40   34.40
   2  -5  -5  434.20   33.55
  -5   3  -5  510.33   34.54
  -5   3  -5  510.94   37.46
  -5   3  -5  438.12   33.82
   3   2  -5  450.65   31.97
   2  -5  -5  445.50   32.43
   5  -3   5  466.27   33.84
   5  -3   5  425.70   33.54
  -2   5   5  448.90   33.80
  -2   5   5  462.79   32.22
  -2   5   5  444.18   33.90
   5  -3   5  438.00   35.21
   1  -5  -5  766.11   52.08
   4   1  -5  791.17   51.29
   1  -5  -5  865.53   52.71
  -5   4  -5  729.41   52.29
  -5   4  -5  828.92   54.89
   1  -5  -5  759.12   49.38
  -5   4  -5  810.57   52.86
   5  -4   5  725.55   52.16
   5  -4   5  711.13   53.13
   5  -4   5  844.74   52.79
  -1   5   5  756.89   52.06
  -1   5   5  766.12   52.29
  -5   5  -5 5775.43  343.78
   0  -5  -5 5649.94  339.96
   5   0  -5 5508.49  343.27
  -5   5  -5 5699.51  343.64
   0  -5  -5 5833.60  343.58
  -5   5  -5 5675.39  344.43
   5   0  -5 5671.65  339.89
   0  -5  -5 5683.62  339.88
   0  -5  -5 5507.45  343.20
  -5   0   5 5793.95  340.01
   5  -5   5 5735.07  344.66
   0   5   5 5828.78  343.50
   0   5   5 5686.05  343.43
   5  -5   5 5991.06  343.97
   5  -5   5 5638.71  343.66
  -5   0   5 5652.57  343.36
   6  -1  -5  -11.99   12.04
  -5   6  -5   -3.56   12.52
   6  -1  -5   -4.94    5.93
   6  -1  -5   11.04    6.36
  -1  -5  -5    0.13    8.01
  -5   6  -5    9.25   10.61
  -5   6  -5  -19.12    9.02
  -1  -5  -5   27.11   11.35
  -6   1   5    8.06   11.80
  -6   1   5   -3.40    5.89
   5  -6   5   -2.26   10.02
   1   5   5   12.72   10.04
   5  -6   5    5.98   12.09
   5  -6   5    6.24    9.38
  -6   1   5    2.09    6.43
   1   5   5   -0.18    9.46
  -5   7  -5 1162.49   77.87
   7  -2  -5 1154.03   72.55
   7  -2  -5 1146.41   72.41
  -5   7  -5 1200.48   76.39
   7  -2  -5 1132.36   77.80
  -2  -5  -5 1168.06   75.26
  -2  -5  -5 1165.06   75.24
   5  -7   5 1258.00   77.24
  -7   2   5 1139.79   77.54
   2   5   5 1207.22   75.34
   5  -7   5 1107.27   76.39
   5  -7   5 1166.64   77.06
  -7   2   5 1113.38   72.34
   2   5   5 1149.51   75.05
  -7   2   5 1175.59   72.58
  -5   8  -5  422.01   35.97
  -5   8  -5  414.58   36.76
   8  -3  -5  447.61   30.83
  -3  -5  -5  383.57   32.96
   8  -3  -5  453.04   39.01
  -5   8  -5  436.39   34.83
   8  -3  -5  401.79   30.11
   3   5   5  453.08   42.93
  -8   3   5  389.49   30.40
   3   5   5  347.27   32.01
   5  -8   5  388.76   36.02
  -8   3   5  411.88   30.30
   5  -8   5  393.92   35.46
   5  -8   5  424.49   35.19
  -8   3   5  350.56   36.45
  -5   9  -5   -2.41   13.96
   9  -4  -5   25.05   16.25
   9  -4  -5   -7.50    9.05
  -5   9  -5   10.64   14.07
  -4  -5  -5   -7.00    8.34
  -5   9  -5    1.67   13.04
  -4  -5  -5    3.72   10.66
   9  -4  -5   -6.42    9.60
  -9   4   5    2.58   10.23
   5  -9   5   -3.09   12.49
   5  -9   5   10.59   13.67
  -9   4   5   10.17   15.02
  -9   4   5   -7.69    9.30
   4   5   5  -17.10   10.46
   5  -9   5   13.96   13.50
   4   5   5    5.70    9.15
  -5  -5  -5    6.51   12.08
  10  -5  -5   -6.35    9.16
  -5  10  -5    2.85   16.04
  10  -5  -5    9.02   11.14
  10  -5  -5   18.10   19.55
  -5  -5  -5   -5.97   10.82
  -5  10  -5  -12.62   12.53
  -5  10  -5  -16.28   14.17
 -10   5   5   -8.16   11.24
 -10   5   5  -23.24   15.04
   5 -10   5   -0.32   12.86
   5 -10   5   10.59   15.40
 -10   5   5    8.73   10.73
   5   5   5    0.11   10.37
   5   5   5  -17.65   10.16
   5 -10   5   -2.97   13.43
  -5  11  -5   71.13   19.97
  -5  11  -5   92.59   18.15
  -6  -5  -5   64.43   16.59
 -11   6   5  121.49   23.84
   5 -11   5   73.67   21.32
 -11   6   5   99.51   17.31
  -6  -4  -5   33.70   10.65
  -6  -4  -5    7.03    6.83
  10  -6  -5    8.18   19.57
  -4  10  -5    2.00   14.04
  -6  -4  -5   18.04   13.23
  10  -6  -5   16.29   12.87
  10  -6  -5    5.83   10.15
   4 -10   5   -3.02   13.85
   6   4   5   12.39   12.00
   4 -10   5   25.98   15.73
 -10   6   5   10.00   17.01
 -10   6   5  -10.64   11.73
   6   4   5   12.17    7.37
   6   4   5   39.35   12.88
   4 -10   5   -1.04   11.60
 -10   6   5   10.11   10.23
  -3   9  -5  161.89   20.62
  -6  -3  -5  164.48   18.08
   9  -6  -5  139.49   17.73
  -6  -3  -5  143.83   16.92
  -3   9  -5  124.88   18.41
  -6  -3  -5  170.88   16.01
  -3   9  -5  143.25   18.28
   9  -6  -5  162.30   17.92
  -9   6   5  105.90   16.39
  -9   6   5  148.13   24.11
   3  -9   5  147.38   19.12
   3  -9   5   93.92   16.33
   3  -9   5  100.86   18.04
   6   3   5  133.73   18.55
   6   3   5  169.02   15.83
   6   3   5  183.67   20.52
  -9   6   5  157.23   19.18
  -2   8  -5  926.95   63.71
  -6  -2  -5  952.78   63.88
  -2   8  -5  944.11   65.38
  -6  -2  -5  937.09   63.45
   8  -6  -5  985.72   69.31
  -6  -2  -5 1043.27   64.72
   8  -6  -5  914.05   67.80
  -2   8  -5  914.67   65.01
   8  -6  -5  970.09   65.38
   6   2   5  932.63   63.31
   2  -8   5 1090.77   66.45
  -8   6   5 1023.35   65.86
   6   2   5 1032.46   64.82
   6   2   5 1046.01   64.84
  -8   6   5  951.63   69.28
   2  -8   5  973.51   63.40
  -1   7  -5   18.62   10.03
   7  -6  -5   16.66   10.07
   7  -6  -5   17.67   14.05
  -6  -1  -5   10.84    9.17
  -1   7  -5   20.07    9.85
  -6  -1  -5   25.22   11.74
  -6  -1  -5   41.61   11.85
  -1   7  -5   17.96   10.80
   7  -6  -5   17.62   12.65
  -7   6   5   25.35   12.02
   1  -7   5   12.93    9.59
   6   1   5   15.64   10.62
  -7   6   5   22.03   14.71
   6   1   5   19.76    9.79
   1  -7   5   12.50    8.21
   6   1   5   16.58   10.53
   1  -7   5   12.69   10.04
  -7   6   5   26.41   11.95
   0   6  -5   35.59   10.21
   0   6  -5   52.27    9.35
   6  -6  -5   33.19   11.21
  -6   0  -5   45.69   13.53
   6  -6  -5    7.86   14.02
  -6   0  -5   48.65   11.28
   0   6  -5   39.23    9.27
   6  -6  -5   31.70   12.17
   0  -6   5   21.19   10.63
  -6   6   5   46.13   17.55
   6   0   5   37.78   12.01
   0  -6   5   33.50    9.55
   6   0   5   36.32   12.58
  -6   6   5   38.50   12.18
   6   0   5   30.44   10.38
  -6   6   5   39.06   12.30
   5  -6  -5   17.36   12.69
   5  -6  -5   -1.29    9.25
  -6   1  -5    2.36   11.80
  -6   1  -5   -8.77    8.45
   5  -6  -5   -2.32    9.42
   1   5  -5   -8.45    6.52
   1   5  -5   11.53    7.14
  -6   1  -5   12.05    7.57
   1   5  -5   -6.34    7.29
  -5   6   5   -0.60   11.30
   6  -1   5    7.57    9.03
   6  -1   5   13.64   12.53
  -5   6   5    3.60   10.55
  -5   6   5    2.07    9.13
  -1  -5   5    3.16    7.80
   6  -1   5    6.98    7.96
   2   4  -5    3.14    6.54
   4  -6  -5   13.80   10.84
   4  -6  -5   -0.31    8.84
   2   4  -5   20.42    7.50
   2   4  -5   -3.10    6.06
  -6   2  -5   -1.06   13.01
   2   4  -5   -8.17    6.79
   4  -6  -5   10.21   11.32
  -6   2  -5   12.84    9.55
  -6   2  -5    8.48    8.84
  -4   6   5  -17.42    8.83
  -2  -4   5   -3.90    6.57
  -4   6   5   16.08   11.91
   6  -2   5    6.29   12.27
  -2  -4   5    7.27    6.59
   6  -2   5   -6.55    7.82
  -4   6   5   14.73   10.60
   3   3  -5   12.92    7.53
   3   3  -5   -4.69    5.02
   3  -6  -5    4.98    9.13
  -6   3  -5  -12.48    8.57
   3  -6  -5    5.22   10.41
   3   3  -5   -4.16    5.15
   3  -6  -5   14.05    9.99
  -6   3  -5    2.71    9.13
  -6   3  -5    1.41   12.50
   6  -3   5    8.74    8.76
   6  -3   5    1.90   12.45
  -3  -3   5    5.04    5.56
  -3  -3   5   -2.88    5.30
  -3   6   5    4.74    9.44
  -3   6   5    1.95    9.43
   6  -3   5   13.85   10.72
  -3   6   5    2.04    7.84
  -6   4  -5    5.91    9.78
   2  -6  -5    8.03   12.26
  -6   4  -5   11.52   11.22
   2  -6  -5    3.22    6.72
   4   2  -5  -12.02    8.17
  -6   4  -5    7.50   13.60
   2  -6  -5    4.94    8.53
  -2   6   5   14.36   10.32
   6  -4   5   -3.42    9.09
  -2   6   5    4.41    8.45
  -2   6   5   -0.22    7.92
   6  -4   5    6.92   11.19
   6  -4   5   16.89   12.82
   1  -6  -5    1.04    7.14
   1  -6  -5   13.62   11.51
  -6   5  -5   15.19   19.82
   1  -6  -5    8.45   11.75
   5   1  -5  -20.37    8.88
  -6   5  -5    2.98   10.93
  -6   5  -5   21.59   11.42
  -5  -1   5    8.07    9.79
  -1   6   5   16.84   11.26
   6  -5   5   12.14   11.52
  -1   6   5  -12.07    9.96
   6  -5   5   -9.69   12.39
   6  -5   5   -8.15    9.92
  -6   6  -5   48.41   15.79
   0  -6  -5   31.19    8.94
   0  -6  -5   34.16   12.49
   6   0  -5   48.52    6.97
  -6   6  -5   25.10    8.48
   6   0  -5   48.55    6.73
   6   0  -5   41.31   13.54
  -6   6  -5   24.32   12.35
   6  -6   5   15.25   11.35
   6  -6   5   30.17   14.05
  -6   0   5   41.41    6.86
   0   6   5   21.77    9.90
   0   6   5   35.67   10.33
   6  -6   5   45.64   15.39
  -6   0   5   48.86   13.19
  -6   0   5   47.58    7.16
  -6   7  -5   27.49   13.68
  -6   7  -5   16.92   15.02
  -1  -6  -5    2.36    9.26
   7  -1  -5   25.60    7.10
  -6   7  -5   27.94   11.62
  -1  -6  -5   34.46   12.18
   7  -1  -5   37.35    7.94
   7  -1  -5   16.86   13.70
   6  -7   5   28.04   13.45
   6  -7   5   28.43   14.90
  -7   1   5   41.12   14.51
  -7   1   5   20.23    7.40
   6  -7   5   30.03   14.64
   1   6   5   23.52   12.71
   1   6   5   10.32    9.18
  -7   1   5   12.84    7.37
  -6   8  -5  947.07   67.23
   8  -2  -5 1022.14   68.97
   8  -2  -5 1048.57   62.36
  -2  -6  -5 1071.44   65.92
   8  -2  -5  933.15   62.04
  -2  -6  -5  962.11   65.17
  -6   8  -5  984.31   68.87
  -6   8  -5  993.50   67.01
  -8   2   5  932.94   61.90
   6  -8   5 1080.03   68.77
   2   6   5  942.55   65.49
  -8   2   5  958.18   68.42
   6  -8   5  945.73   67.57
  -8   2   5  994.80   62.29
   6  -8   5  923.45   67.15
   2   6   5  931.65   65.20
   9  -3  -5  165.16   23.95
   9  -3  -5  113.65   22.41
  -3  -6  -5  150.19   17.96
  -6   9  -5  103.09   16.88
   9  -3  -5  181.01   16.83
  -6   9  -5  114.48   17.03
  -6   9  -5  152.17   22.17
   3   6   5  121.96   17.15
   6  -9   5  128.01   21.04
   6  -9   5  121.55   18.32
   6  -9   5  157.85   22.21
   3   6   5  160.28   19.56
  -9   3   5  150.16   22.20
  -9   3   5  124.39   15.32
  -9   3   5  151.36   15.75
  10  -4  -5   -3.21   18.94
  -6  10  -5    1.14   14.96
  -4  -6  -5   15.99   12.11
  10  -4  -5    8.07   10.00
  -6  10  -5   -0.52   13.71
  -4  -6  -5   18.49   12.45
  10  -4  -5    3.75   10.94
  -6  10  -5    7.74   13.07
   4   6   5   17.82   10.49
 -10   4   5   21.02   11.46
   6 -10   5   -0.71   14.31
 -10   4   5   14.89    9.48
 -10   4   5   18.70   17.56
   6 -10   5   -7.03   14.62
   6 -10   5   12.86   14.90
   4   6   5   -1.88   11.77
  -5  -6  -5   68.41   14.60
  -6  11  -5   93.87   19.50
  -6  11  -5   85.73   21.86
  -6  11  -5   53.64   14.39
 -11   5   5   37.81   13.21
 -11   5   5   73.44   21.49
   6 -11   5   75.54   19.04
   6 -11   5   47.60   18.01
 -11   5   5   60.84   14.70
  -6  12  -5   -1.31   15.66
   6 -12   5   27.29   17.10
  -7  -6  -5   87.61   17.17
 -13   7   5   74.73   18.27
   6 -13   5   86.11   28.92
 -13   7   5   27.32   20.65
  -5  12  -5   35.82   15.63
  -7  -5  -5    8.28   14.39
   5 -12   5   14.17   17.97
 -12   7   5   23.70   20.22
  -7  -4  -5   19.92   12.19
  -4  11  -5   22.60   14.14
 -11   7   5   14.80   13.84
 -11   7   5   -8.06   16.77
   4 -11   5   16.65   14.17
  10  -7  -5    7.09   16.77
  -7  -3  -5   18.14   11.22
  -3  10  -5   18.63   13.56
  10  -7  -5   39.99   13.91
  -7  -3  -5   55.86   10.96
  -3  10  -5   18.65   11.90
  10  -7  -5   23.74   31.60
  -7  -3  -5   39.53   12.67
  -3  10  -5   21.73   15.12
   7   3   5   28.14   11.20
   7   3   5   56.62   15.46
 -10   7   5   22.53   14.22
 -10   7   5   22.67   12.05
 -10   7   5   12.38   16.50
   3 -10   5    9.18   12.01
   3 -10   5   24.81   13.44
  -7  -2  -5  444.89   33.30
   9  -7  -5  428.68   41.55
  -7  -2  -5  431.28   33.69
  -2   9  -5  369.41   37.67
   9  -7  -5  421.12   35.68
  -7  -2  -5  397.06   32.61
  -2   9  -5  388.08   35.18
  -2   9  -5  446.62   32.85
   9  -7  -5  390.77   34.59
   7   2   5  420.04   33.73
   2  -9   5  435.93   31.86
   2  -9   5  371.47   35.80
   7   2   5  390.39   33.80
   7   2   5  445.72   33.18
  -9   7   5  447.71   41.45
  -9   7   5  447.68   36.79
  -9   7   5  364.62   33.20
  -7  -1  -5   17.01   11.51
   8  -7  -5    8.53   12.75
  -1   8  -5   22.12   11.41
   8  -7  -5   18.07   15.31
   8  -7  -5    3.49   12.55
  -7  -1  -5   18.81   10.86
  -1   8  -5    6.75    9.52
  -7  -1  -5   -4.19    9.77
  -1   8  -5   -7.97   10.65
   7   1   5   -8.75   11.11
   1  -8   5   20.68    8.20
  -8   7   5   10.39   12.55
   7   1   5    9.67   10.07
   1  -8   5   13.16   12.19
   1  -8   5    9.29    9.90
  -8   7   5    3.85   15.87
  -8   7   5   11.49   11.84
   7   1   5   25.42   10.58
   7  -7  -5  256.88   26.73
  -7   0  -5  266.80   24.41
  -7   0  -5  263.67   25.43
   0   7  -5  269.85   24.85
  -7   0  -5  271.36   26.16
   7  -7  -5  283.33   30.99
   0   7  -5  304.24   22.42
   0   7  -5  259.27   23.93
   7  -7  -5  261.84   27.74
   0  -7   5  238.85   24.50
   7   0   5  256.57   24.78
  -7   7   5  276.75   29.52
  -7   7   5  263.63   26.86
   0  -7   5  290.51   25.24
   7   0   5  256.53   25.43
  -7   7   5  291.73   29.46
   7   0   5  256.53   27.57
   1   6  -5    4.88    8.07
  -7   1  -5   25.19   14.37
   6  -7  -5   -9.67   11.42
   6  -7  -5   40.22   15.30
   6  -7  -5    6.46   12.36
   1   6  -5   26.98    7.52
  -7   1  -5   13.70   10.34
  -6   7   5    9.39   13.49
  -1  -6   5   29.19   10.39
   7  -1   5   22.37   13.05
  -6   7   5   19.59    9.59
   7  -1   5   10.33    9.29
  -1  -6   5    8.99    8.99
  -6   7   5   31.62   13.17
   2   5  -5 1165.90   72.90
   2   5  -5 1214.74   73.78
   5  -7  -5 1091.37   77.52
   2   5  -5 1135.59   73.53
  -7   2  -5 1233.77   76.65
   5  -7  -5 1301.34   78.34
  -7   2  -5 1142.27   75.90
   2   5  -5 1189.37   72.97
   5  -7  -5 1158.08   77.33
  -2  -5   5 1180.90   73.65
   7  -2   5 1139.15   76.16
  -5   7   5 1180.75   77.46
   7  -2   5 1140.70   78.41
  -2  -5   5 1203.00   74.00
  -5   7   5 1119.16   77.20
   7  -2   5 1247.97   76.42
  -5   7   5 1215.67   77.56
   3   4  -5 1148.90   73.64
  -7   3  -5 1173.71   76.31
   3   4  -5 1239.19   73.70
  -7   3  -5 1162.83   79.27
   3   4  -5 1168.15   72.81
   3   4  -5 1170.81   72.90
   4  -7  -5 1155.69   76.51
   4  -7  -5 1138.79   77.59
  -7   3  -5 1180.06   76.69
   7  -3   5 1195.61   78.88
  -4   7   5 1126.75   77.69
  -4   7   5 1125.38   77.06
   7  -3   5 1288.72   76.98
  -3  -4   5 1160.39   72.72
  -4   7   5 1230.18   76.50
   7  -3   5 1163.99   76.48
  -3  -4   5 1233.68   73.15
   4   3  -5 1206.76   75.67
  -7   4  -5 1212.67   78.37
  -7   4  -5 1211.31   80.54
  -7   4  -5 1096.13   77.43
   3  -7  -5 1297.36   79.20
   4   3  -5 1173.84   73.21
   3  -7  -5 1144.74   78.28
   3  -7  -5 1172.61   76.55
   4   3  -5 1204.48   73.21
  -4  -3   5 1218.90   73.25
   7  -4   5 1141.00   77.70
  -3   7   5 1149.68   76.18
  -3   7   5 1231.83   78.81
  -3   7   5 1219.38   78.56
  -4  -3   5 1235.23   73.39
   7  -4   5 1209.15   80.36
   7  -4   5 1292.10   78.54
  -7   5  -5 1163.60   76.74
   5   2  -5 1174.57   74.94
  -7   5  -5 1286.23   79.49
  -7   5  -5 1135.02   76.68
   2  -7  -5 1218.80   77.37
   2  -7  -5 1129.89   76.52
   2  -7  -5 1091.00   73.41
   7  -5   5 1110.12   76.29
   7  -5   5 1146.18   78.72
  -2   7   5 1188.61   77.04
   7  -5   5 1249.09   77.17
  -7   6  -5   17.61   12.77
   1  -7  -5   16.31   11.86
  -7   6  -5   16.50   16.76
  -7   6  -5    9.15   10.41
   1  -7  -5   18.80   12.96
   1  -7  -5   19.54    6.91
  -1   7   5   15.63   11.97
   7  -6   5    0.20   14.98
  -6  -1   5   14.73   11.21
  -1   7   5    9.89   11.98
   7  -6   5   -0.77   11.49
  -7   7  -5  274.77   27.93
   0  -7  -5  313.03   28.65
   7   0  -5  268.63   19.41
   7   0  -5  259.90   19.33
   0  -7  -5  257.18   26.81
  -7   7  -5  251.68   28.72
   7   0  -5  266.66   28.13
   7  -7   5  264.97   28.96
   7  -7   5  218.79   26.83
  -7   0   5  277.28   19.92
   0   7   5  247.54   26.17
   7  -7   5  182.82   22.77
   0   7   5  268.17   27.22
  -7   0   5  247.79   19.31
   8  -1  -5   11.99    7.59
  -1  -7  -5   17.69   10.26
  -1  -7  -5   19.31   13.48
  -7   8  -5   15.45   11.97
   8  -1  -5   23.54   14.78
   8  -1  -5    1.53    6.13
  -7   8  -5  -12.09   12.92
  -7   8  -5   13.66   16.66
   7  -8   5    6.87   13.65
  -8   1   5    8.66    7.00
   7  -8   5    1.50   10.96
  -8   1   5   -3.38   13.62
  -8   1   5    5.85    7.67
   1   7   5    4.12   12.71
   7  -8   5  -14.42   15.18
   1   7   5   -1.82   11.23
  -2  -7  -5  462.37   34.19
   9  -2  -5  413.96   38.99
   9  -2  -5  399.91   30.49
  -7   9  -5  473.81   40.86
  -2  -7  -5  391.83   35.18
  -7   9  -5  457.76   37.63
  -7   9  -5  450.69   41.75
   9  -2  -5  415.57   30.58
  -9   2   5  424.24   30.70
  -9   2   5  395.39   30.37
  -9   2   5  469.95   40.13
   7  -9   5  359.65   37.51
   2   7   5  396.30   35.27
   7  -9   5  383.84   41.08
   7  -9   5  431.18   39.44
   2   7   5  368.33   34.75
  10  -3  -5   51.41   20.71
  -7  10  -5   18.97   16.61
  -3  -7  -5   24.85   10.63
  -7  10  -5   30.90   16.88
  -7  10  -5   27.97   15.27
  -3  -7  -5   34.50   12.91
  10  -3  -5   36.11   11.34
 -10   3   5   36.39   11.25
 -10   3   5   22.04   10.00
   3   7   5   18.72   14.50
   7 -10   5   42.94   16.24
 -10   3   5   35.26   18.07
   3   7   5   32.73   15.56
   7 -10   5   22.63   17.23
   7 -10   5   43.88   20.45
  -7  11  -5   49.12   18.04
  -7  11  -5   18.51   16.03
  -4  -7  -5    9.70   13.11
  -7  11  -5   -8.80   19.47
   7 -11   5   -2.20   15.18
 -11   4   5    0.36   10.79
   7 -11   5  -14.31   15.93
 -11   4   5   30.10   19.42
 -11   4   5    2.49   10.34
  -7  12  -5    9.73   16.93
  -5  -7  -5   26.75   23.20
 -12   5   5   -5.19   17.31
 -12   5   5   -1.59   13.10
   7 -12   5  -11.79   16.15
  -7  13  -5   87.22   20.49
  -6  -7  -5   69.31   16.90
 -13   6   5   53.31   15.94
   7 -13   5   26.90   19.58
 -13   6   5   93.30   23.34
  -7  -7  -5   11.59   14.81
   7 -14   5  -16.47   20.53
 -14   7   5   21.47   21.98
 -14   7   5   -0.25   14.49
  -8  -7  -5   -9.90   17.22
 -15   8   5  -15.71   15.63
   7 -15   5  -11.04   19.61
 -15   8   5   11.26   23.55
  -8  -6  -5   59.44   16.95
 -14   8   5   97.22   27.46
 -14   8   5   69.53   18.85
   6 -14   5   74.79   21.08
  -8  -5  -5   40.74   15.00
   5 -13   5   34.63   17.42
 -13   8   5   41.36   22.53
 -13   8   5   50.92   17.81
  -8  -4  -5   56.15   14.63
 -12   8   5   46.91   26.44
 -12   8   5   44.22   20.20
   4 -12   5   77.18   17.70
  -3  11  -5  366.70   29.08
  -8  -3  -5  275.58   26.39
  -8  -3  -5  281.65   28.69
 -11   8   5  264.33   32.80
 -11   8   5  341.37   33.90
   3 -11   5  271.99   29.93
  -8  -2  -5  196.47   21.65
  -2  10  -5  206.39   29.14
  -8  -2  -5  197.34   22.18
  10  -8  -5  164.96   21.97
  -8  -2  -5  230.24   22.95
  -2  10  -5  242.39   22.19
 -10   8   5  217.74   24.80
 -10   8   5  258.88   32.29
   2 -10   5  195.07   22.94
   9  -8  -5    2.21   15.27
   9  -8  -5   38.19   14.45
  -8  -1  -5   13.92   11.43
  -1   9  -5   15.20   11.13
  -1   9  -5   32.98    9.91
   9  -8  -5   15.02   19.06
  -8  -1  -5    7.72   11.14
  -8  -1  -5   33.26   13.65
  -1   9  -5   18.54   12.14
  -9   8   5   25.77   13.73
   1  -9   5    1.57   12.84
   8   1   5   24.49   12.51
   8   1   5   21.25   13.17
  -9   8   5   33.39   14.92
   1  -9   5   31.94   13.88
  -9   8   5   -2.50   16.71
   8   1   5   32.21   12.19
   0   8  -5    0.91    7.52
   8  -8  -5   -1.69   12.38
   0   8  -5   22.85   10.88
  -8   0  -5   34.93   11.62
   8  -8  -5   -4.13   12.72
  -8   0  -5   23.27   13.80
   0   8  -5    6.20   19.31
   8  -8  -5   11.09   17.06
  -8   0  -5   13.67   10.86
  -8   8   5    8.94   11.08
   0  -8   5    7.17   11.42
   8   0   5    1.79   10.41
   8   0   5    1.90   13.54
   0  -8   5   13.42   10.44
  -8   8   5   26.29   17.30
   8   0   5   14.05   12.21
  -8   8   5    4.70   13.36
   7  -8  -5   -1.29   10.16
   1   7  -5    7.30    6.82
  -8   1  -5    2.91   10.93
   1   7  -5   15.06   10.37
  -8   1  -5   15.18   14.61
  -8   1  -5   -4.15    8.92
   1   7  -5    2.12    5.95
   7  -8  -5   20.29   15.85
   1   7  -5   -0.11    8.30
   7  -8  -5    4.26   14.03
   8  -1   5    9.73    9.45
  -7   8   5   -1.70   14.62
  -1  -7   5   -2.78    9.21
  -1  -7   5    2.22    9.60
  -7   8   5  -13.33   12.02
   8  -1   5   21.33   11.86
   8  -1   5   -4.80   13.32
  -7   8   5    7.01   14.00
   6  -8  -5  918.09   66.94
   2   6  -5  974.74   62.11
   2   6  -5  930.46   59.86
   2   6  -5  941.36   59.86
  -8   2  -5  994.19   64.91
  -8   2  -5  945.65   67.35
   2   6  -5 1021.92   62.29
   6  -8  -5  974.39   66.87
  -6   8   5  938.71   67.16
  -6   8   5  936.17   65.45
  -6   8   5  981.44   66.25
  -2  -6   5 1011.98   62.12
   8  -2   5  995.73   67.72
   8  -2   5 1004.60   65.16
  -2  -6   5  922.90   62.21
   8  -2   5  948.16   64.45
   5  -8  -5  377.09   35.23
  -8   3  -5  420.15   32.49
   3   5  -5  389.02   28.69
  -8   3  -5  396.61   33.94
   3   5  -5  443.73   28.85
   5  -8  -5  425.57   35.77
   3   5  -5  401.24   28.36
  -8   3  -5  380.50   38.30
   3   5  -5  390.29   28.30
   8  -3   5  380.41   37.00
  -5   8   5  373.14   33.72
   8  -3   5  395.98   33.22
  -3  -5   5  392.60   29.24
   8  -3   5  401.39   33.46
  -5   8   5  411.42   37.13
  -5   8   5  386.62   34.36
  -3  -5   5  418.53   28.74
   4  -8  -5    5.13   13.00
   4  -8  -5    1.52   12.06
   4   4  -5   14.55    8.72
  -8   4  -5  -11.47   11.06
   4  -8  -5   -0.83   12.83
   4   4  -5  -15.30    6.13
   4   4  -5    2.93    6.27
  -8   4  -5   -6.43   11.27
   4   4  -5  -11.93    7.91
  -8   4  -5   -4.08   15.94
  -4   8   5    3.48   10.91
  -4  -4   5  -12.44    6.68
   8  -4   5   -3.33   11.75
  -4  -4   5    1.63    6.64
  -4   8   5   -0.47   12.71
  -4   8   5   11.32   12.34
   8  -4   5    2.26   14.40
   8  -4   5   -0.50   10.14
   3  -8  -5  401.71   35.61
   5   3  -5  374.85   30.03
  -8   5  -5  396.53   38.06
   3  -8  -5  394.55   31.19
  -8   5  -5  393.88   32.65
  -8   5  -5  386.25   34.67
   3  -8  -5  338.20   33.69
   8  -5   5  381.24   33.41
  -3   8   5  330.15   33.45
   8  -5   5  394.04   37.73
  -3   8   5  413.11   35.22
  -3   8   5  364.25   29.99
  -5  -3   5  393.88   26.13
   8  -5   5  415.47   33.86
  -8   6  -5  959.70   66.42
  -8   6  -5  980.12   70.40
   2  -8  -5  970.70   69.46
   6   2  -5  974.79   66.29
   2  -8  -5  965.34   67.09
  -8   6  -5 1034.84   67.88
   2  -8  -5  962.32   62.03
  -2   8   5  933.83   66.69
   8  -6   5 1103.21   67.44
   8  -6   5  925.06   69.57
  -2   8   5  992.76   67.27
   8  -6   5  927.74   66.58
   1  -8  -5   -8.55    9.30
   1  -8  -5   -7.16   12.32
   7   1  -5   -6.08   11.89
  -8   7  -5   28.74   17.25
  -8   7  -5    6.39   15.37
  -8   7  -5    2.92   13.00
  -1   8   5   18.77   12.88
  -7  -1   5    5.78   12.57
   8  -7   5   -9.15    9.56
   8  -7   5   14.86   13.14
   8  -7   5   25.06   17.13
  -1   8   5   16.88   12.75
   0  -8  -5   34.84   15.04
  -8   8  -5   -3.02    9.19
   8   0  -5   12.91    7.35
   8   0  -5   20.52    6.85
   0  -8  -5   -5.31   12.61
  -8   8  -5   12.36   17.00
   8   0  -5   11.22   13.54
  -8   0   5   20.93    7.10
  -8   0   5   15.05    7.43
   8  -8   5    9.76   15.55
   0   8   5   21.35   13.31
   8  -8   5    2.28   15.88
  -8   0   5    1.86   12.86
   0   8   5   -4.19   10.47
   8  -8   5   27.35   12.64
  -1  -8  -5  -16.63   11.75
   9  -1  -5   38.60   16.53
   9  -1  -5    2.46    7.40
   9  -1  -5   17.47    8.60
  -1  -8  -5   11.43   12.48
  -8   9  -5   10.48   10.58
  -8   9  -5   -9.75   17.10
   8  -9   5   25.34   14.68
  -9   1   5   16.67    7.68
   1   8   5   36.57   15.00
   1   8   5   41.08   17.46
  -9   1   5   40.08   16.08
  -9   1   5   25.88    8.86
   8  -9   5   29.87   15.36
   8  -9   5   15.59   18.06
  10  -2  -5  207.27   28.54
  -8  10  -5  265.57   35.66
  -2  -8  -5  229.81   25.51
  -8  10  -5  176.17   24.84
  -8  10  -5  173.22   26.88
   8 -10   5  306.33   32.16
 -10   2   5  214.66   20.84
   8 -10   5  171.94   24.08
 -10   2   5  237.54   20.45
   8 -10   5  187.52   28.27
   2   8   5  191.70   22.57
 -10   2   5  191.82   26.83
  -3  -8  -5  300.56   31.09
  -8  11  -5  322.77   34.87
  -8  11  -5  274.44   32.99
   8 -11   5  354.04   35.52
 -11   3   5  382.30   38.00
   8 -11   5  194.18   31.11
 -11   3   5  306.20   26.84
 -11   3   5  288.30   26.11
  -4  -8  -5   36.74   15.21
  -8  12  -5   95.33   21.78
   8 -12   5   58.75   20.07
 -12   4   5   46.45   20.36
 -12   4   5   37.66   13.28
  -8  13  -5   88.67   21.29
  -5  -8  -5   37.99   14.77
   8 -13   5   54.40   21.06
 -13   5   5   36.00   20.74
 -13   5   5   51.73   15.33
  -6  -8  -5   88.16   19.90
 -14   6   5   68.91   17.14
 -14   6   5   87.30   26.51
   8 -14   5   66.93   23.20
  -7  -8  -5    8.47   17.02
 -15   7   5  -14.10   21.64
   8 -15   5   14.02   31.55
 -15   7   5   -4.96   16.34
   6 -15   5   15.29   19.00
 -15   9   5   43.05   23.10
  -9  -5  -5   64.59   16.80
 -14   9   5   33.05   17.67
 -14   9   5   78.09   26.77
   5 -14   5   56.03   22.10
  -9  -4  -5   -9.88   11.73
 -13   9   5    6.47   15.60
 -13   9   5   25.27   21.78
   4 -13   5    1.49   18.84
  -9  -3  -5   -2.86   11.69
 -12   9   5    7.14   17.25
 -12   9   5   41.63   21.89
   3 -12   5   29.09   17.62
  -9  -2  -5  138.63   19.31
  -9  -2  -5  146.18   19.04
   2 -11   5  156.48   23.50
 -11   9   5  133.93   22.20
 -11   9   5  127.46   25.24
  -9  -1  -5    9.20   13.02
  -9  -1  -5   -3.09   10.76
  10  -9  -5    1.48   15.29
 -10   9   5   -7.49   16.71
   1 -10   5  -18.58   11.97
 -10   9   5    0.85   15.36
   9  -9  -5  219.25   29.10
   9  -9  -5  294.38   32.18
  -9   0  -5  170.18   20.64
  -9   0  -5  223.47   23.69
  -9   0  -5  203.78   24.29
   9  -9  -5  219.18   27.30
   9   0   5  181.89   24.84
   0  -9   5  208.67   22.51
  -9   9   5  221.25   29.25
   0  -9   5  233.25   23.86
  -9   9   5  195.49   26.99
   1   8  -5   -5.39   10.43
   8  -9  -5   -0.34   13.84
   8  -9  -5   10.08   14.19
  -9   1  -5   12.89   12.44
  -9   1  -5   32.96   15.70
   1   8  -5   -0.86    9.11
  -9   1  -5    8.67   11.08
  -1  -8   5   26.80   11.47
  -8   9   5   17.24   11.42
   9  -1   5   10.98   11.58
   9  -1   5   12.21   15.19
   9  -1   5   38.80   13.37
  -1  -8   5   20.64   11.05
  -8   9   5   16.31   16.26
  -8   9   5   26.11   15.77
   7  -9  -5  371.24   39.69
   2   7  -5  405.88   31.63
  -9   2  -5  401.23   35.13
   7  -9  -5  455.76   37.52
   2   7  -5  370.55   31.59
   7  -9  -5  394.09   37.95
  -9   2  -5  460.36   39.99
  -9   2  -5  421.37   33.82
  -7   9   5  401.80   36.64
   9  -2   5  430.26   35.07
   9  -2   5  430.89   39.40
  -7   9   5  452.81   41.58
  -7   9   5  453.41   38.61
  -2  -7   5  423.40   32.43
  -2  -7   5  390.21   31.72
   6  -9  -5  109.58   19.86
   3   6  -5  144.17   14.90
   6  -9  -5   80.72   15.46
   3   6  -5  173.93   13.89
  -9   3  -5  148.80   22.97
   3   6  -5  118.43   13.18
  -9   3  -5  118.74   18.10
   6  -9  -5  103.52   17.03
   9  -3   5  145.81   17.96
  -6   9   5  131.39   18.35
  -6   9   5  128.78   19.47
  -3  -6   5  183.94   16.54
  -6   9   5  106.28   28.39
   9  -3   5  153.75   19.12
  -3  -6   5  172.55   16.02
   9  -3   5  130.67   22.49
   5  -9  -5    0.50   12.19
  -9   4  -5   -8.09   11.47
   4   5  -5  -12.46    7.38
  -9   4  -5   23.49   13.37
  -9   4  -5   -5.12   15.86
   4   5  -5   -0.60    6.59
   5  -9  -5    4.98   14.95
   5  -9  -5  -10.94   12.80
   4   5  -5   13.59    7.59
   4   5  -5   15.22    7.72
  -4  -5   5    9.78    7.86
   9  -4   5    1.52   11.50
   9  -4   5  -29.97   11.81
  -4  -5   5    8.69    8.22
  -5   9   5   14.40   16.86
   9  -4   5  -21.63   15.25
  -5   9   5   -6.78   13.16
  -9   5  -5   12.59   17.84
   5   4  -5    4.19    6.74
   5   4  -5    2.89    8.81
   5   4  -5   -2.69    6.65
   5   4  -5   -4.19    8.61
   4  -9  -5    3.01   13.57
   4  -9  -5   18.82   14.00
   4  -9  -5   -0.50   11.88
  -9   5  -5   -0.16   12.40
  -9   5  -5   15.52   14.04
   9  -5   5  -16.81   15.33
  -5  -4   5    9.27    7.10
  -4   9   5   -1.86   10.42
  -4   9   5   -3.50   11.87
   9  -5   5   -3.77   10.75
   9  -5   5   -8.21   11.68
  -5  -4   5   -6.57    7.47
  -4   9   5   13.59   14.31
   3  -9  -5   85.31   16.19
   6   3  -5  178.28   18.01
  -9   6  -5  139.53   20.01
  -9   6  -5  136.29   24.82
  -9   6  -5  202.34   23.11
   3  -9  -5  139.92   21.77
   3  -9  -5  164.79   17.19
  -3   9   5   95.43   16.51
  -3   9   5  148.82   15.76
   9  -6   5  149.66   21.68
   9  -6   5  133.55   18.39
   2  -9  -5  417.74   37.59
   7   2  -5  459.97   34.92
  -9   7  -5  423.91   36.71
   2  -9  -5  433.83   29.58
  -9   7  -5  422.22   38.88
   2  -9  -5  360.63   36.01
  -9   7  -5  452.28   42.26
   9  -7   5  418.82   37.25
  -2   9   5  430.79   38.07
   9  -7   5  431.83   37.50
  -2   9   5  360.40   36.28
   9  -7   5  342.24   39.93
  -9   8  -5    3.77    9.79
  -9   8  -5   15.07   17.32
   1  -9  -5   10.90   13.28
  -9   8  -5   11.01   18.20
   1  -9  -5   19.11   12.89
   8   1  -5   21.90   14.35
  -1   9   5   21.16   12.75
  -8  -1   5   37.86   14.00
   9  -8   5   33.51   16.48
   9  -8   5  -15.90   17.32
   9  -8   5   26.70   16.81
  -1   9   5   18.53   14.55
  -9   9  -5  204.33   28.67
  -9   9  -5  225.71   27.82
  -9   9  -5  278.78   31.42
   9   0  -5  238.63   27.06
   9   0  -5  207.86   18.01
   9   0  -5  197.02   17.85
   0  -9  -5  210.97   24.57
  -9   0   5  148.94   23.06
   0   9   5  144.92   20.11
  -9   0   5  194.58   18.44
   9  -9   5  189.53   24.77
  -9   0   5  183.03   17.17
   9  -9   5  263.19   28.71
   9  -9   5  161.29   27.34
   0   9   5  244.50   27.19
  10  -1  -5  -36.62   16.82
  -9  10  -5   39.95   20.31
  -9  10  -5   37.68   22.73
  -1  -9  -5   -1.91   12.87
   9 -10   5   10.65   16.56
 -10   1   5   12.46   16.29
 -10   1   5   11.04    8.28
 -10   1   5    2.10    8.43
  -9  11  -5   69.99   17.09
  -2  -9  -5  114.76   19.55
  -9  11  -5  144.94   25.47
 -11   2   5  109.96   13.90
   9 -11   5  138.00   24.15
 -11   2   5  165.28   16.15
 -11   2   5  115.97   23.04
  -3  -9  -5   26.92   15.59
  -9  12  -5   26.69   19.89
   9 -12   5  -12.89   16.40
 -12   3   5   12.99   11.49
 -12   3   5   35.38   20.09
  -4  -9  -5   13.49   14.60
  -9  13  -5   19.38   19.79
   9 -13   5    3.58   17.84
 -13   4   5   23.64   19.79
 -13   4   5   -6.16   11.71
  -9  14  -5   64.25   21.26
  -5  -9  -5   50.86   17.57
 -14   5   5   39.30   14.83
 -14   5   5   80.30   24.70
  -6  -9  -5    7.51   32.35
 -15   6   5   23.39   23.04
 -10  -5  -5  104.82   20.48
   5 -15   5   62.16   25.33
 -15  10   5   66.49   33.94
 -15  10   5  172.98   36.92
 -10  -4  -5   41.86   16.19
 -14  10   5   33.04   25.08
 -14  10   5   30.45   20.67
   4 -14   5   12.79   18.29
 -10  -3  -5    9.68   13.64
   3 -13   5  -12.58   15.15
 -13  10   5   50.65   23.61
 -13  10   5   -2.66   19.01
 -10  -2  -5    1.09   12.27
   2 -12   5   -8.52   14.49
 -12  10   5   16.75   20.77
 -12  10   5   -9.19   17.43
 -10  -1  -5   24.98   13.02
 -10  -1  -5   49.52   15.72
   1 -11   5   22.35   17.79
 -11  10   5   45.77   17.95
 -10   0  -5  426.21   37.75
 -10   0  -5  476.80   40.65
 -10  10   5  503.71   49.18
 -10  10   5  471.75   46.68
   0 -10   5  463.72   38.89
   9 -10  -5    6.23   14.39
   9 -10  -5  -53.77   29.93
 -10   1  -5    1.21   14.60
 -10   1  -5    6.89   13.11
   9 -10  -5   -3.89   14.05
  -9  10   5    7.21   15.82
  -1  -9   5    2.02   11.89
  -9  10   5   16.79   16.72
  -1  -9   5   10.25   12.44
   8 -10  -5  193.49   28.74
 -10   2  -5  236.26   24.83
   8 -10  -5  219.41   29.91
 -10   2  -5  252.23   28.96
 -10   2  -5  249.13   29.23
  -2  -8   5  223.94   22.79
  10  -2   5  207.40   30.33
  -2  -8   5  215.57   22.85
  -8  10   5  216.91   27.14
  -8  10   5  243.50   30.79
   7 -10  -5   15.94   17.56
   7 -10  -5   21.59   12.65
   3   7  -5   40.09   10.83
 -10   3  -5   39.20   13.04
 -10   3  -5   19.72   17.39
 -10   3  -5   30.24   14.77
   7 -10  -5   38.99   18.59
  -7  10   5   19.69   15.16
  -3  -7   5   31.10   10.18
  -3  -7   5   38.68   11.74
  -7  10   5   41.84   16.76
  10  -3   5   -6.10   16.98
  10  -3   5   43.54   18.79
  10  -3   5   23.37   13.39
 -10   4  -5   21.51   13.51
 -10   4  -5   39.00   18.32
   4   6  -5   20.34    9.17
   6 -10  -5   40.56   18.45
 -10   4  -5   25.83   12.11
   4   6  -5   20.29    8.66
   6 -10  -5   51.74   18.11
   4   6  -5   15.33    6.43
   4   6  -5    4.40    6.33
   6 -10  -5   26.95   16.20
  10  -4   5    7.27   12.87
  10  -4   5   -5.85   17.54
  -4  -6   5   16.04    8.80
  -6  10   5   32.50   15.19
  -6  10   5    8.57   15.65
  -6  10   5  -12.74   13.09
  -4  -6   5   17.45    9.87
  10  -4   5    1.62   11.28
   5 -10  -5    1.14   13.37
   5 -10  -5  -22.07   12.66
   5   5  -5    8.77    8.52
   5   5  -5    7.67    7.76
   5 -10  -5   35.42   16.90
   5   5  -5    3.11    7.72
 -10   5  -5   17.23   18.33
   5   5  -5   10.58    8.77
 -10   5  -5   -9.85   13.08
 -10   5  -5    6.49   12.47
  -5  10   5   28.10   13.88
  10  -5   5  -27.04   17.20
  -5  10   5   -2.96   16.82
  10  -5   5    8.23   13.22
  -5  10   5   -1.75   12.56
  -5  -5   5   -7.65    7.58
  10  -5   5   19.58   13.83
   6   4  -5    1.48    9.64
 -10   6  -5   33.78   19.82
 -10   6  -5    9.83   13.77
   4 -10  -5   -1.30   11.54
   4 -10  -5   10.26   13.87
 -10   6  -5   -3.64   14.17
  -4  10   5   14.34   15.92
  10  -6   5   16.17   13.99
  -4  10   5    6.08   10.40
  -6  -4   5   22.22    8.12
  -4  10   5   27.15   12.94
  10  -6   5   19.66   20.46
  10  -6   5    3.24   12.94
 -10   7  -5   14.51   16.03
 -10   7  -5   24.13   14.71
   3 -10  -5   25.34   10.67
   3 -10  -5   63.04   20.02
 -10   7  -5   26.43   19.73
   7   3  -5   30.53   12.63
   3 -10  -5   55.75   18.07
  -3  10   5   27.86   15.34
  10  -7   5   32.68   17.40
  -3  10   5   30.37   16.64
  10  -7   5   45.41   16.70
 -10   8  -5  236.84   30.54
 -10   8  -5  220.19   27.48
   8   2  -5  207.69   24.15
   2 -10  -5  271.90   28.41
  10  -8   5  216.77   27.49
  10  -8   5  191.13   24.36
  -2  10   5  233.66   27.39
   1 -10  -5    4.84   15.17
 -10   9  -5   -7.95   17.43
 -10   9  -5   18.68   19.50
   9   1  -5    0.56   15.26
  10  -9   5   21.35   16.65
  10  -9   5  -13.91   15.50
  -1  10   5   -7.86   15.20
 -10  10  -5  429.00   46.01
   0 -10  -5  424.45   41.33
 -10  10  -5  553.07   51.02
 -10   0   5  487.15   41.79
  -1 -10  -5   38.79   17.28
 -10  11  -5    0.19   23.56
 -10  11  -5   23.57   20.92
 -11   1   5   35.62    9.09
 -11   1   5   21.58   17.97
  10 -11   5   32.43   20.43
 -11   1   5   53.45   18.07
 -10  12  -5   42.50   22.50
  -2 -10  -5   20.25   15.97
 -12   2   5   50.18   19.10
 -12   2   5   11.93   10.71
  -3 -10  -5    0.58   16.13
 -10  13  -5   46.55   20.83
 -13   3   5   -1.04   18.72
 -13   3   5  -22.19   10.62
  -4 -10  -5   19.24   15.67
 -10  14  -5   53.78   22.08
 -14   4   5   42.60   22.17
 -14   4   5   10.29   12.72
  -5 -10  -5  133.08   24.26
 -15   5   5  104.64   27.46
 -15   5   5   91.54   20.62
 -11  -4  -5   -4.80   14.34
   4 -15   5   -8.61   19.93
 -15  11   5   13.76   21.35
 -15  11   5   72.61   30.58
 -11  -3  -5   19.92   15.28
 -14  11   5   61.28   29.14
   3 -14   5   34.75   20.79
 -14  11   5   15.79   20.54
 -11  -2  -5    0.85   13.84
 -13  11   5   32.15   25.01
   2 -13   5    3.16   16.16
 -13  11   5  -12.98   21.12
 -11  -1  -5   52.88   16.54
 -12  11   5   58.67   24.24
 -12  11   5    6.33   20.04
   1 -12   5   39.36   16.62
 -11   0  -5   28.04   15.08
 -11   0  -5   53.63   17.31
   0 -11   5   45.95   16.13
 -11  11   5   24.93   22.48
 -11  11   5   32.54   17.52
 -11   1  -5   29.97   17.36
 -11   1  -5   40.54   15.01
  -1 -10   5   34.70   13.12
 -10  11   5    8.16   19.18
 -10  11   5   34.89   21.91
 -11   2  -5  137.73   19.79
   9 -11  -5   63.08   31.30
 -11   2  -5  150.87   23.91
  -9  11   5  159.77   25.74
  -9  11   5  174.74   28.52
  -2  -9   5  114.65   17.05
 -11   3  -5  334.14   35.14
 -11   3  -5  326.89   31.92
   8 -11  -5  224.96   32.67
   8 -11  -5  276.31   29.69
  -8  11   5  311.92   32.88
  -8  11   5  243.91   29.65
  -3  -8   5  356.42   30.13
  -3  -8   5  318.63   26.56
   7 -11  -5  -18.49   17.01
 -11   4  -5    3.32   17.05
   7 -11  -5   15.23   18.59
 -11   4  -5   35.11   15.65
  -7  11   5   17.40   15.41
  -7  11   5   17.35   18.34
  -4  -7   5    6.90   13.63
  -4  -7   5   28.14   10.60
   6 -11  -5   35.25   18.68
   6 -11  -5   66.88   18.20
 -11   5  -5   64.56   22.14
 -11   5  -5   71.55   17.96
  -6  11   5   73.50   16.78
  -5  -6   5   71.00   12.64
  -6  11   5   79.91   24.19
  -5  -6   5   64.95   11.26
   6   5  -5   67.30   12.76
 -11   6  -5   66.24   21.84
 -11   6  -5   61.46   18.16
   5 -11  -5   68.99   21.88
  -6  -5   5   82.07   11.78
  -6  -5   5   80.58   10.90
  -5  11   5   54.59   16.95
  -5  11   5   52.28   17.92
  -5  11   5  125.55   17.02
 -11   7  -5   -3.95   17.12
   4 -11  -5   26.91   15.05
 -11   7  -5   20.70   19.87
  -4  11   5    1.81   17.24
  11  -7   5   19.01   15.34
 -11   8  -5  292.56   36.47
   3 -11  -5  391.03   37.30
 -11   8  -5  392.13   36.24
  -3  11   5  241.93   30.31
  11  -8   5  294.41   31.70
 -11   9  -5  149.98   21.90
 -11   9  -5  143.22   28.39
   2 -11  -5  125.35   22.69
  11  -9   5  178.63   27.73
   1 -11  -5   12.75   16.04
 -11  10  -5   -0.31   31.92
 -11  10  -5   28.19   22.76
 -11  11  -5   28.19   17.72
 -11  11  -5   44.52   21.70
   0 -11  -5   19.17   16.78
 -11   0   5   52.92   18.51
 -11  12  -5   59.47   32.27
  -1 -11  -5   18.24   15.48
 -11  12  -5   34.42   21.38
 -12   1   5   42.08   18.61
  -2 -11  -5    7.63   16.89
 -11  13  -5   20.57   20.99
 -13   2   5    8.89   18.19
 -13   2   5   24.93   11.15
 -11  14  -5   37.63   21.95
  -3 -11  -5   19.00   17.81
 -14   3   5   44.98   21.77
 -14   3   5    1.44   11.77
  -4 -11  -5  -20.34   16.84
 -15   4   5   20.69   20.28
 -15   4   5    2.62   12.65
 -14  12   5   61.28   27.26
 -14  12   5   66.16   35.78
   2 -14   5   64.36   24.66
 -12  -1  -5   88.15   19.26
 -13  12   5   73.11   23.72
 -13  12   5   96.36   29.15
   1 -13   5   89.91   21.58
 -12   0  -5  179.41   23.86
   0 -12   5  157.61   24.14
 -12  12   5  198.88   33.45
 -12   1  -5   48.99   18.55
 -12   1  -5   46.79   16.40
  -1 -11   5   36.48   15.22
 -11  12   5   88.69   24.97
 -11  12   5   17.31   24.23
 -12   2  -5   13.38   14.40
 -12   2  -5   31.03   18.69
 -10  12   5   16.19   16.28
  -2 -10   5    6.97   12.61
 -10  12   5   -3.29   26.67
 -12   3  -5   -3.90   13.76
 -12   3  -5   16.99   18.08
  -9  12   5   19.99   17.60
  -3  -9   5   20.58   11.58
  -9  12   5   27.58   18.79
 -12   4  -5   37.18   20.16
   8 -12  -5   69.31   38.48
 -12   4  -5   56.46   24.13
  -8  12   5   48.11   24.61
  -4  -8   5   62.81   12.81
  -8  12   5   65.03   19.11
 -12   5  -5    1.04   14.77
   7 -12  -5   -1.97   16.04
 -12   5  -5    7.36   18.53
  -7  12   5   13.25   15.72
  -7  12   5   11.89   22.20
  -5  -7   5    7.77   11.05
   6 -12  -5    1.39   19.21
 -12   6  -5    8.67   16.20
 -12   6  -5   33.77   22.16
  -6  12   5   17.76   14.96
  -6  -6   5   -0.89    9.62
  -6  -6   5   -8.27    8.06
  -6  12   5   -5.89   13.58
 -12   7  -5   24.58   16.05
   5 -12  -5   10.36   16.37
 -12   8  -5   49.96   21.90
 -12   8  -5   79.70   20.30
   4 -12  -5   57.55   20.83
   3 -12  -5   -5.50   16.45
 -12   9  -5  -10.45   19.15
 -12   9  -5    4.49   17.63
 -12  10  -5   14.44   21.08
   2 -12  -5    5.77   19.53
 -12  10  -5  -22.39   18.64
 -12  11  -5   36.16   23.96
 -12  11  -5   35.83   22.56
   1 -12  -5   26.04   19.08
   0 -12  -5  140.06   25.43
 -12  12  -5  184.12   35.76
 -12  12  -5  141.40   28.78
 -12  13  -5   73.15   24.64
  -1 -12  -5   81.44   21.82
  -2 -12  -5   59.21   22.08
 -12  14  -5   69.34   24.02
 -13   0  -5   96.59   22.78
   0 -13   5   39.09   20.51
 -13  13   5   -0.59   23.62
 -13  13   5   92.76   31.09
 -13   1  -5   74.21   18.73
 -12  13   5  105.95   28.67
 -12  13   5  112.58   30.07
  -1 -12   5   84.20   19.57
 -13   2  -5   -9.44   13.90
 -13   2  -5    6.44   17.41
 -11  13   5   -8.91   17.30
 -11  13   5   -0.02   20.26
  -2 -11   5   13.34   13.47
 -13   3  -5   20.33   15.50
 -13   3  -5   13.49   18.72
  -3 -10   5   -9.20   11.41
 -10  13   5  -21.19   21.38
 -10  13   5    7.27   19.73
 -13   4  -5   11.63   16.94
 -13   4  -5   18.60   18.39
  -9  13   5   20.12   24.40
  -4  -9   5  -22.74   10.01
  -9  13   5  -17.22   16.94
 -13   5  -5   60.67   21.71
 -13   5  -5   60.35   19.58
  -5  -8   5   49.68   12.20
  -8  13   5   59.38   20.27
   7 -13  -5   91.16   25.23
 -13   6  -5   41.25   22.29
 -13   6  -5   78.68   20.64
  -6  -7   5   61.94   11.83
  -6  -7   5   68.34   13.83
 -13   7  -5   59.29   22.92
 -13   7  -5   22.71   19.80
   6 -13  -5   62.77   21.77
 -13   8  -5   76.99   23.52
   5 -13  -5   54.91   25.77
 -13   8  -5   53.89   22.68
 -13   9  -5    7.25   20.57
   4 -13  -5   -2.24   22.50
 -13   9  -5   -9.15   21.79
 -13  10  -5   27.85   22.23
   3 -13  -5   -0.21   18.64
 -13  10  -5   24.83   18.86
 -13  11  -5   -2.19   20.52
 -13  11  -5   -4.29   20.30
   2 -13  -5    3.08   18.63
 -13  12  -5   74.00   30.74
   1 -13  -5   39.90   20.75
 -13  12  -5  151.05   29.24
 -13  13  -5   45.79   23.88
   0 -13  -5   44.45   20.17
 -14   2  -5   72.10   31.14
 -12  14   5   82.56   28.35
  -2 -12   5   84.31   28.88
 -14   3  -5   62.12   21.08
 -14   3  -5   35.81   18.01
  -3 -11   5   16.46   14.52
 -11  14   5   29.97   23.73
 -14   4  -5   25.24   18.95
 -14   4  -5   28.77   20.63
 -10  14   5   20.54   20.49
  -4 -10   5   18.01   12.50
 -14   5  -5   59.09   21.04
 -14   5  -5   75.57   23.55
  -5  -9   5   50.55   13.24
 -14   6  -5   97.67   24.98
 -14   6  -5   64.94   20.64
 -14   7  -5   49.48   23.07
 -14   7  -5  -31.64   17.81
 -14   8  -5  113.06   24.69
 -14   8  -5   94.88   26.59
 -14   9  -5   48.48   22.21
 -14   9  -5   59.99   25.25
   5 -14  -5   60.75   23.10
 -14  10  -5   21.19   20.01
   4 -14  -5   22.15   20.44
 -14  10  -5   24.61   22.18
 -14  11  -5   10.90   23.02
   3 -14  -5  -18.87   19.03
 -14  11  -5   37.84   26.38
 -14  12  -5  113.88   38.97
   2 -14  -5   86.57   24.00
 -14  12  -5   27.18   39.65
 -15   4  -5   25.82   20.40
 -15   4  -5    7.40   18.18
  -4 -11   5   11.88   13.79
 -15   5  -5  113.76   27.67
 -15   5  -5  108.59   26.15
 -15   6  -5   18.47   18.60
 -15   6  -5   42.26   22.72
 -15   7  -5   16.99   20.30
 -15   7  -5   25.77   21.80
 -15   8  -5  -12.83   18.64
 -15   8  -5   50.02   23.67
 -15   9  -5   64.40   46.12
 -15   9  -5   34.78   22.11
 -15  10  -5  129.50   31.13
 -15  10  -5   53.43   24.97
 -15  11  -5   47.73   23.53
   4 -15  -5   12.47   21.72
 -15  11  -5    1.50   19.94
   0   0  -6  186.59   16.46
   0   0  -6  172.91   15.18
   0   0  -6  220.30   18.03
   0   0   6  165.56   15.47
   0   0   6  165.99   16.90
  -1   0  -6   39.72    8.20
   0   1  -6   70.90   10.56
   1  -1  -6   54.46    8.32
  -1   0  -6   66.09   11.04
   0   1  -6   75.17    8.16
   1  -1  -6   65.83    8.01
   0   1  -6   59.99    7.65
  -1   0  -6   64.41    9.83
   0  -1   6   53.30    7.75
   0  -1   6   79.58    8.49
   1   0   6   51.07    9.10
   1   0   6   81.64   10.55
  -1   1   6   75.31    9.58
   0  -1   6   51.62   10.00
   1   0   6   75.18   10.40
   0  -1  -6   86.03   10.21
   0  -1  -6   46.29    7.77
  -1   1  -6   47.98   10.43
   1   0  -6   68.26    6.85
   1   0  -6   68.70    7.36
  -1   1  -6   70.64    9.62
  -1   1  -6   69.94    8.28
   0  -1  -6   42.94    8.59
  -1   0   6   58.16    6.97
   1  -1   6   85.93   10.94
   0   1   6   34.94    7.07
  -1   0   6   52.81    6.82
   1  -1   6   66.90    9.52
   0   1   6   59.72   10.11
   1  -1   6   84.53    9.85
   2  -1  -6   80.59    8.56
  -1   2  -6   84.76   10.80
   2  -1  -6   78.58    8.60
  -1   2  -6  106.77   12.97
  -1  -1  -6   96.05   11.39
  -1   2  -6   97.08   12.16
  -1  -1  -6   60.94   10.84
   2  -1  -6   88.32   12.68
   1  -2   6   56.24    9.04
  -2   1   6   75.52    8.85
   1   1   6   91.11   10.26
   1   1   6   96.69   11.69
   1  -2   6   86.82   12.20
  -2   1   6   84.39    9.06
   1   1   6   70.62   10.49
  -1   3  -6  250.32   20.80
  -2  -1  -6  180.84   19.34
  -2  -1  -6  244.26   19.39
   3  -2  -6  208.28   17.88
   3  -2  -6  200.70   17.62
   3  -2  -6  207.57   22.38
  -1   3  -6  234.39   18.79
  -1   3  -6  195.53   18.53
  -2  -1  -6  218.51   20.09
   1  -3   6  196.01   20.38
   2   1   6  238.25   19.17
  -3   2   6  215.77   22.33
  -3   2   6  232.98   18.18
   2   1   6  180.40   19.76
  -3   2   6  192.57   17.98
   2   1   6  245.67   20.18
   1  -3   6  231.64   20.46
   1  -3   6  200.84   18.64
   0   2  -6  710.37   47.30
   0   2  -6  752.51   45.51
  -2   0  -6  710.09   46.98
   0   2  -6  723.20   45.48
  -2   0  -6  752.14   47.74
   2  -2  -6  752.01   46.18
  -2   0  -6  692.08   46.96
   2  -2  -6  720.78   47.91
   0  -2   6  724.26   45.43
   2   0   6  725.72   47.10
   0  -2   6  704.71   45.39
   2   0   6  727.60   47.37
   2   0   6  738.99   47.08
   0  -2   6  690.56   46.92
   1  -2  -6   66.34    9.90
  -2   1  -6   87.00   11.27
   1   1  -6   76.20    7.01
   1   1  -6   65.39   10.76
   1  -2  -6   76.76   10.29
   1   1  -6   82.59    7.16
  -2   1  -6   75.82   10.74
   1  -2  -6   95.83   11.42
   2  -1   6   63.71   11.15
  -1  -1   6   65.29    6.80
  -1   2   6   75.12   10.46
   2  -1   6   62.12   10.29
  -1  -1   6   79.99    7.28
  -1   2   6   53.56   10.38
   2  -1   6   74.58   10.38
   0  -2  -6  715.40   46.17
  -2   2  -6  743.53   46.90
   2   0  -6  734.48   43.92
  -2   2  -6  729.93   47.15
  -2   2  -6  710.47   48.06
   0  -2  -6  723.92   46.90
   0  -2  -6  731.82   47.02
   2   0  -6  711.52   47.59
   2  -2   6  694.88   47.75
   2  -2   6  726.91   47.04
   0   2   6  693.62   46.97
   0   2   6  742.60   47.10
   2  -2   6  739.44   47.07
  -1  -2  -6  228.21   19.53
   3  -1  -6  204.57   15.73
  -1  -2  -6  201.85   19.57
  -2   3  -6  232.36   22.37
  -1  -2  -6  209.59   17.72
  -2   3  -6  170.34   19.02
   3  -1  -6  237.50   15.72
   3  -1  -6  219.32   21.85
  -2   3  -6  207.94   19.61
   2  -3   6  206.43   20.36
   1   2   6  190.03   17.10
  -3   1   6  222.53   15.87
  -3   1   6  185.93   15.79
  -3   1   6  189.25   19.49
   1   2   6  210.33   20.03
   1   2   6  219.46   20.08
   2  -3   6  198.07   20.13
  -2  -2  -6   44.16   11.30
  -2  -2  -6   48.18    8.25
  -2   4  -6   27.93    8.06
  -2  -2  -6   16.37    9.78
  -2   4  -6   60.35   11.10
   4  -2  -6   50.42   11.96
   4  -2  -6   55.11    8.38
  -2   4  -6   38.71    9.06
   4  -2  -6   40.78    7.31
   2   2   6   22.24    7.88
   2  -4   6   34.72    9.57
   2  -4   6   25.99   10.00
   2  -4   6   38.76   10.44
  -4   2   6   36.27   11.53
  -4   2   6   33.59    7.67
  -4   2   6   40.60    7.68
   2   2   6   24.17    8.19
   2   2   6   34.12    7.32
  -2   5  -6  231.86   22.75
  -3  -2  -6  213.71   21.42
  -3  -2  -6  209.41   21.95
  -3  -2  -6  270.87   20.39
  -2   5  -6  260.31   21.43
   5  -3  -6  253.01   20.29
   5  -3  -6  227.21   24.30
  -2   5  -6  200.58   21.07
   5  -3  -6  261.74   19.76
   3   2   6  250.88   19.36
  -5   3   6  231.21   20.17
   2  -5   6  182.20   19.82
  -5   3   6  238.04   20.27
   2  -5   6  244.59   22.31
   3   2   6  239.75   21.85
  -5   3   6  241.12   25.01
   3   2   6  223.39   21.54
   2  -5   6  240.13   21.93
  -1   4  -6  280.84   22.01
  -1   4  -6  252.76   21.53
  -3  -1  -6  311.38   23.62
  -1   4  -6  277.34   22.63
   4  -3  -6  287.24   21.60
   4  -3  -6  259.10   24.69
  -3  -1  -6  272.18   22.99
  -3  -1  -6  253.95   22.86
   4  -3  -6  256.82   21.79
  -4   3   6  280.64   21.91
   3   1   6  271.98   21.91
  -4   3   6  240.72   25.81
   3   1   6  287.60   23.12
   3   1   6  309.88   23.24
   1  -4   6  250.00   22.46
  -4   3   6  247.92   21.73
   1  -4   6  273.55   22.38
   1  -4   6  269.21   22.17
   3  -3  -6   40.96    9.61
  -3   0  -6   37.85   10.05
   0   3  -6   19.35    8.59
   0   3  -6   26.93    6.98
  -3   0  -6   12.91    8.91
   0   3  -6   36.66    7.15
   3  -3  -6   14.57   11.28
   3  -3  -6   43.62    9.20
  -3   0  -6    9.48    8.02
  -3   3   6   26.54    8.52
   0  -3   6   26.04    7.35
   0  -3   6   35.26    8.63
   3   0   6   16.45    8.60
   3   0   6   30.79    9.47
   3   0   6   39.43    9.86
  -3   3   6   49.75   11.69
   0  -3   6   20.05    7.36
  -3   1  -6  258.29   21.96
   1   2  -6  208.08   15.18
  -3   1  -6  207.31   19.52
   2  -3  -6  206.12   20.07
   1   2  -6  249.09   19.31
   2  -3  -6  195.38   19.45
   2  -3  -6  204.50   18.88
  -3   1  -6  222.73   19.48
   1   2  -6  212.30   15.41
  -2   3   6  200.51   19.52
  -1  -2   6  203.56   15.38
  -2   3   6  182.25   19.35
  -2   3   6  194.15   20.64
   3  -1   6  214.18   21.39
  -1  -2   6  186.31   15.45
   3  -1   6  217.04   20.22
   1  -3  -6  219.07   18.95
   2   1  -6  214.41   19.63
   1  -3  -6  250.04   20.60
  -3   2  -6  196.06   22.24
  -3   2  -6  202.78   20.49
   1  -3  -6  223.77   19.85
   3  -2   6  221.79   21.54
   3  -2   6  180.19   19.65
  -1   3   6  189.91   19.48
  -1   3   6  183.34   19.78
   0  -3  -6   14.48    8.06
   0  -3  -6   37.43    7.54
  -3   3  -6   24.92    8.92
  -3   3  -6   23.23   11.10
   3   0  -6   11.75    9.21
  -3   3  -6   27.17    9.46
   0   3   6   27.93   10.31
   3  -3   6   19.96    7.00
   3  -3   6   16.49    9.38
   0   3   6   22.78    9.66
   3  -3   6   29.62   11.41
  -1  -3  -6  294.27   20.54
   4  -1  -6  291.93   19.72
  -3   4  -6  281.56   25.49
  -3   4  -6  302.30   24.41
  -1  -3  -6  279.11   23.80
  -3   4  -6  263.18   24.09
   4  -1  -6  268.55   25.64
  -1  -3  -6  261.25   23.71
   4  -1  -6  300.54   19.59
   1   3   6  325.95   24.73
   3  -4   6  290.06   24.87
   1   3   6  249.23   23.79
   3  -4   6  266.01   25.72
   3  -4   6  253.42   24.36
  -4   1   6  290.91   19.77
  -4   1   6  275.41   25.94
  -4   1   6  275.42   19.64
  -2  -3  -6  227.84   22.48
  -3   5  -6  205.55   21.95
  -3   5  -6  252.52   24.13
  -2  -3  -6  262.63   18.97
   5  -2  -6  249.52   19.21
   5  -2  -6  221.71   24.25
  -3   5  -6  220.00   22.10
   5  -2  -6  235.91   19.34
  -2  -3  -6  261.23   22.88
   2   3   6  270.09   18.26
   2   3   6  242.59   22.28
   3  -5   6  270.77   23.14
   3  -5   6  257.72   23.34
  -5   2   6  238.64   19.33
  -5   2   6  266.17   25.65
   3  -5   6  243.98   22.89
   2   3   6  230.50   22.48
  -5   2   6  240.55   19.41
   6  -3  -6   35.43    9.10
  -3  -3  -6   59.71   11.27
  -3  -3  -6   32.60    7.90
  -3  -3  -6   39.44   11.32
  -3   6  -6   27.51   10.95
   6  -3  -6   36.08    8.90
   6  -3  -6   30.89   13.67
  -3   6  -6   37.30   12.78
  -3   6  -6   43.97   11.22
   3  -6   6   24.28   10.38
   3   3   6   31.76    7.12
   3  -6   6   33.27   12.77
   3   3   6   32.28    9.29
  -6   3   6   28.01    8.98
  -6   3   6   32.29   13.61
   3   3   6   50.98   12.57
  -6   3   6   32.82    9.99
   3  -6   6   21.90   11.02
  -4  -3  -6   36.15    9.20
  -3   7  -6   22.87   10.77
  -3   7  -6   26.91   11.17
  -3   7  -6   56.08   13.71
  -4  -3  -6   56.44   11.78
   7  -4  -6   23.32    9.39
   7  -4  -6   45.67   10.74
   7  -4  -6   26.37   14.77
   4   3   6   23.48    7.91
   4   3   6   24.38   10.38
   4   3   6   26.74   10.66
   3  -7   6   48.55   12.27
  -7   4   6   22.55   15.47
  -7   4   6   24.12   10.69
   3  -7   6   25.02   11.04
  -7   4   6   42.88   11.66
  -4  -2  -6   35.93   10.05
  -4  -2  -6   30.46    9.17
  -2   6  -6   40.16   11.45
   6  -4  -6   25.84    9.06
  -2   6  -6   34.96   10.29
  -4  -2  -6   23.75    9.95
   6  -4  -6   46.54   10.82
  -2   6  -6   26.64   10.49
   6  -4  -6   31.95   14.37
   4   2   6   21.54    8.46
   2  -6   6   42.67   12.95
   4   2   6   37.84   10.20
  -6   4   6   35.78   10.15
   2  -6   6   39.56   11.06
  -6   4   6   31.81   13.96
   4   2   6   33.11    8.74
  -6   4   6   24.39    9.96
   5  -4  -6   12.95    8.52
  -4  -1  -6   29.25    9.91
  -1   5  -6   35.67    9.31
   5  -4  -6   15.68    7.55
  -1   5  -6   30.96    9.19
  -4  -1  -6   10.84    9.21
  -1   5  -6    1.16    9.42
  -4  -1  -6   12.74    9.09
   4   1   6    0.85    7.62
   1  -5   6   30.73   10.42
  -5   4   6   17.57    9.47
   1  -5   6   19.15    8.30
   4   1   6    7.84    8.72
   4   1   6   15.73    8.66
  -5   4   6   22.05   12.55
   1  -5   6   11.74    8.40
  -4   0  -6   45.02    9.98
   4  -4  -6   50.31   10.96
   4  -4  -6   38.66   10.23
   0   4  -6   40.25    8.90
   0   4  -6   47.28    8.59
  -4   0  -6   49.35   12.04
   4  -4  -6   46.63   12.69
   0   4  -6   56.85    9.14
  -4   0  -6   23.42    9.19
   0  -4   6   35.12    8.67
   4   0   6   39.78   11.29
   4   0   6   36.11   10.43
   0  -4   6   47.54    8.69
  -4   4   6   58.09   11.23
  -4   4   6   36.06    9.17
   0  -4   6   36.17    8.57
  -4   4   6   66.48   13.56
   4   0   6   47.19   10.52
   3  -4  -6  262.82   23.42
  -4   1  -6  288.68   25.42
   1   3  -6  285.09   19.87
   3  -4  -6  283.81   23.43
   1   3  -6  263.29   21.96
  -4   1  -6  272.48   24.10
   1   3  -6  269.92   19.70
   3  -4  -6  294.21   24.92
  -4   1  -6  293.49   23.72
  -1  -3   6  297.94   20.15
   4  -1   6  238.01   23.52
   4  -1   6  237.69   24.50
  -1  -3   6  269.58   19.90
   4  -1   6  311.75   23.96
  -3   4   6  266.99   23.19
  -3   4   6  289.10   25.25
  -3   4   6  258.95   23.70
   2  -4  -6   20.05    9.52
  -4   2  -6   21.50    9.12
   2  -4  -6   15.65    7.17
   2  -4  -6   27.89    9.36
  -4   2  -6   33.29   11.53
   2   2  -6   25.89    8.84
  -4   2  -6   43.61   10.12
   4  -2   6   43.93   11.73
  -2   4   6   51.44   11.03
  -2   4   6   26.84    9.76
   4  -2   6   39.74   10.42
   4  -2   6   34.51   11.89
  -2   4   6   51.90    9.89
  -4   3  -6  289.38   24.23
   1  -4  -6  299.09   23.85
  -4   3  -6  264.43   23.96
   3   1  -6  286.73   22.87
  -4   3  -6  238.89   25.34
   1  -4  -6  242.07   21.30
   4  -3   6  221.03   23.33
   4  -3   6  262.82   24.89
  -1   4   6  260.03   23.89
   4  -3   6  295.49   23.62
  -1   4   6  289.99   23.90
   0  -4  -6   49.87   11.39
   4   0  -6   32.85   10.87
   0  -4  -6   48.74    7.32
   0  -4  -6   27.98    8.37
   0  -4  -6   56.31    7.77
  -4   4  -6   52.51   13.72
  -4   4  -6   16.63    8.60
  -4   4  -6   63.70   11.73
   4  -4   6   31.60    8.48
   4  -4   6   61.89   12.66
  -4   0   6   55.81   12.41
   0   4   6   51.70   11.97
   4  -4   6   28.18   11.13
   0   4   6   24.68    9.20
  -4   5  -6   28.89   10.03
  -4   5  -6   14.43   10.40
  -1  -4  -6   20.60    5.22
  -4   5  -6    3.59   12.78
   5  -1  -6    5.56    5.22
   5  -1  -6   16.80   11.29
  -1  -4  -6   32.47   11.52
   5  -1  -6   15.30    5.87
  -1  -4  -6   25.90   10.86
  -1  -4  -6   15.96    5.47
  -5   1   6    3.42    5.66
  -5   1   6   13.32   11.87
   4  -5   6   11.16   11.58
   4  -5   6    8.24   11.21
   1   4   6    7.72    9.98
   1   4   6   22.83    8.74
  -5   1   6   25.32    6.24
   4  -5   6   21.13   10.53
  -4   6  -6   79.21   14.59
   6  -2  -6   36.21    8.28
  -4   6  -6   17.47    8.66
   6  -2  -6   31.46    7.75
  -2  -4  -6   48.85    6.60
  -4   6  -6   65.10   15.14
  -2  -4  -6   43.07   10.82
   6  -2  -6   31.26   13.51
   2   4   6   42.35   11.39
   2   4   6   45.72   12.43
  -6   2   6   36.49   13.50
  -6   2   6   35.37    8.73
   4  -6   6   41.51   10.23
   4  -6   6   34.20   12.71
  -6   2   6   53.41    8.62
   7  -3  -6   19.95    8.79
   7  -3  -6   53.99   15.60
  -3  -4  -6   33.95   10.97
  -3  -4  -6   29.95    8.85
  -3  -4  -6   34.31    6.33
  -4   7  -6   40.89   13.09
  -4   7  -6   20.04   13.51
   7  -3  -6   29.36    9.03
  -4   7  -6   52.03   13.55
   3   4   6   44.47   11.74
   3   4   6   39.39   10.78
  -7   3   6   25.07    8.73
  -7   3   6   37.41   16.44
   4  -7   6   44.98   14.28
   4  -7   6   31.76   11.73
  -7   3   6   21.59    9.48
   4  -7   6   43.15   13.39
  -4  -4  -6  105.79   11.21
   8  -4  -6   94.47   13.41
   8  -4  -6  106.27   13.89
  -4  -4  -6  113.84   15.94
   8  -4  -6   85.00   19.29
  -4   8  -6   72.36   16.44
  -4   8  -6   67.51   15.39
  -4   8  -6   67.11   14.10
   4  -8   6  118.88   19.05
   4  -8   6  126.61   17.14
   4   4   6  111.73   10.83
  -8   4   6   89.16   13.38
   4   4   6   66.01   16.31
   4  -8   6   82.44   17.01
  -8   4   6   89.13   19.90
   4   4   6   93.38   15.20
  -8   4   6   79.64   13.20
  -5  -4  -6   -0.20    6.28
   9  -5  -6    8.71   10.76
  -5  -4  -6   -7.04   10.38
  -4   9  -6  -24.47   12.22
  -5  -4  -6  -14.77    9.88
  -4   9  -6   -3.08   11.84
   5   4   6   -1.94    9.32
   5   4   6    1.03   11.25
   4  -9   6   19.38   12.79
   4  -9   6   15.54   12.73
  -9   5   6   12.30   14.92
  -9   5   6    0.46   10.30
   4  -9   6    3.65   12.08
  -9   5   6    2.35    9.15
   5   4   6    0.82    6.42
  -3   8  -6  338.84   31.92
  -5  -3  -6  351.80   31.87
   8  -5  -6  358.03   29.86
  -5  -3  -6  337.78   27.47
  -5  -3  -6  428.74   31.68
  -3   8  -6  316.95   31.30
   8  -5  -6  330.93   29.28
   8  -5  -6  378.78   36.05
  -3   8  -6  376.09   32.48
  -8   5   6  365.13   29.59
   5   3   6  384.10   27.27
  -8   5   6  380.55   30.87
   5   3   6  369.08   30.76
   5   3   6  367.07   30.79
   3  -8   6  350.61   33.21
  -8   5   6  390.63   36.09
   3  -8   6  315.69   31.21
   3  -8   6  394.42   32.59
   7  -5  -6   41.07   15.82
  -2   7  -6   28.00   11.03
  -2   7  -6   51.61   13.12
  -2   7  -6   27.25   12.60
   7  -5  -6   77.71   13.37
  -5  -2  -6   51.57   11.20
  -5  -2  -6   50.84   13.25
   7  -5  -6   48.23   10.95
  -7   5   6   55.99   12.17
   5   2   6   41.09   10.41
   2  -7   6   35.34   11.47
   2  -7   6   46.89   11.09
   5   2   6   56.19   15.63
  -7   5   6   28.95   15.12
   5   2   6   32.60   10.83
  -7   5   6   52.63   11.53
   6  -5  -6  381.95   35.04
   6  -5  -6  432.30   31.96
  -5  -1  -6  439.27   32.43
   6  -5  -6  385.34   31.15
  -1   6  -6  403.14   30.92
  -5  -1  -6  402.05   31.83
  -1   6  -6  423.72   31.51
  -1   6  -6  377.11   30.58
   1  -6   6  411.04   30.44
   5   1   6  439.28   31.71
   1  -6   6  405.62   30.99
   5   1   6  405.75   31.19
   5   1   6  377.41   31.48
  -6   5   6  448.71   32.50
  -5   0  -6  148.01   16.25
   5  -5  -6  188.40   21.14
   0   5  -6  176.79   17.09
   5  -5  -6  136.12   16.19
   0   5  -6  183.24   17.27
  -5   0  -6  174.00   17.00
   0   5  -6  171.66   16.89
  -5   0  -6  193.92   18.88
   5  -5  -6  121.95   15.70
   5   0   6  193.03   18.34
   0  -5   6  197.26   17.18
   5   0   6  143.91   17.75
   5   0   6  199.07   20.44
  -5   5   6  187.48   19.49
   0  -5   6  171.05   17.56
  -5   5   6  159.68   19.30
   0  -5   6  215.16   18.02
  -5   5   6  154.54   16.93
   4  -5  -6   14.04    8.46
   4  -5  -6   47.79   12.81
  -5   1  -6   16.02   10.31
   1   4  -6   15.23    6.93
   1   4  -6   19.17    7.82
  -5   1  -6   14.53    9.92
   1   4  -6    2.24    7.26
   4  -5  -6   11.41    9.32
  -5   1  -6   -5.07   11.41
   5  -1   6    7.11    7.54
   5  -1   6   29.58   10.20
  -1  -4   6   32.94    7.80
   5  -1   6   23.92   11.49
  -4   5   6   27.49   11.82
  -1  -4   6   20.43    7.00
  -4   5   6   22.21   11.18
  -4   5   6   13.22    9.62
   3  -5  -6  239.16   23.06
   3  -5  -6  242.73   23.73
   2   3  -6  245.64   17.71
   2   3  -6  247.70   20.97
  -5   2  -6  248.78   22.94
  -5   2  -6  296.97   26.35
   2   3  -6  272.74   21.26
   3  -5  -6  254.84   23.59
   2   3  -6  239.88   17.93
  -5   2  -6  216.39   23.30
  -2  -3   6  240.20   17.99
  -3   5   6  268.04   23.66
   5  -2   6  247.82   25.81
   5  -2   6  258.99   23.28
  -3   5   6  241.88   23.48
  -2  -3   6  269.59   18.11
  -3   5   6  228.23   22.96
   5  -2   6  280.18   23.14
   2  -5  -6  236.85   23.35
   2  -5  -6  257.24   21.70
  -5   3  -6  232.35   23.54
   2  -5  -6  281.27   24.07
  -5   3  -6  234.83   23.00
  -5   3  -6  267.50   26.76
   3   2  -6  240.82   21.30
  -2   5   6  276.42   21.67
   5  -3   6  258.05   25.76
[truncated: 852,449 more chars]
